# Supplementary material for: Repeated Exposure of Macrophages to Synthetic Amorphous Silica Induces Adaptive Proteome Changes and a Moderate Cell Activation
Source: MDPI journal article supplement (doi:10.3390/nano12091424), 2022-04-22
Supplement: s1 [file s1]

Table S3: list of proteins modulated in response to treatment with fumed silica

Coverage: % coverage of the protein sequence by the peptides identified in the mass spectrometry analysis

#peptides: number of peptides used for protein identification

U Fu vs ctrl: result of the Mann Whitney U test in the comparison control vs treated with fumed silica

B-H: evaluation of the false positive rate by the Benjamini-Hochberg method

SGoF+ : evaluation of the false positive rate by the Sequential Goodness of Fit method

Sfisher : : evaluation of the false positive rate by the Sequential Fisher test method

| accession number | gene_name | description                                                                   | protein_set_s core | coverage | MW     | #peptides | U Fu vs ctrl | ratio Fu/ctrl | B-H         | SGoF+       | Sfisher     |
|------------------|-----------|-------------------------------------------------------------------------------|--------------------|----------|--------|-----------|--------------|---------------|-------------|-------------|-------------|
| A2RSY6           | Trmt1l    | TRMT1-like protein                                                            | 90.625             | 4.4      | 80861  | 2         | 0            | 0.825740987   | 0.23128573  | 1.61254E-24 | 4.1071E-32  |
| D3ZCL3           | Snrpc     | U1 small nuclear ribonucleoprotein C                                          | 61.28              | 16.98    | 17364  | 2         | 0            | 0.625453666   | 0.13358441  | 1.07272E-52 | 1.50246E-86 |
| O08528           | Hk2       | Hexokinase-2                                                                  | 826.505            | 39.04    | 102535 | 30        | 0            | 0.908565234   | 0.28507094  | 3.80878E-10 | 1.98838E-12 |
| O08553           | Dpysl2    | Dihydropyrimidinase-related protein 2                                         | 1630.64            | 79.2     | 62278  | 33        | 0            | 0.893579019   | 0.079171354 | 1.45742E-53 | 4.19836E-89 |
| O08997           | Atox1     | Copper transport protein ATOX1                                                | 124.127            | 58.82    | 7338   | 4         | 0            | 0.746070005   | 0.30513796  | 0.00367379  | 0.000359576 |
| O09159           | Man2b1    | Lysosomal alpha-mannosidase                                                   | 557.178            | 24.38    | 114648 | 17        | 0            | 0.874440359   | 0.20737785  | 5.12043E-39 | 1.96722E-56 |
| O35691           | Pnn       | Pinin                                                                         | 55.561             | 3.17     | 82436  | 2         | 0            | 0.541080378   | 0.0235938   | 6.57984E-56 | 1.48736E-97 |
| O35855           | Bcat2     | Branched-chain-amino-acid aminotransferase, mitochondrial                     | 337.251            | 36.64    | 44127  | 10        | 0            | 0.914033063   | 0.25788439  | 1.89868E-16 | 1.48269E-20 |
| O54734           | Ddost     | Dolichyl-diphosphooligosaccharide--protein glycosyltransferase 48 kDa subunit | 568.017            | 50.57    | 49028  | 15        | 0            | 1.08875869    | 0.21730432  | 2.0596E-28  | 3.38859E-38 |
| O55143           | Atp2a2    | Sarcoplasmic/endoplasmic reticulum calcium ATPase 2                           | 625.662            | 20.69    | 114858 | 16        | 0            | 0.913351432   | 0.23103754  | 1.02063E-25 | 6.06881E-34 |
| O70152           | Dpm1      | Dolichol-phosphate mannosyltransferase subunit 1                              | 34.675             | 7.31     | 29175  | 2         | 0            | 1.584323185   | 0.3363215   | 1           | 0.91986959  |
| P01899           | H2-D1     | H-2 class I histocompatibility antigen, D-B alpha chain                       | 255.44             | 28.45    | 40836  | 9         | 0            | 1.126852296   | 0.26627283  | 4.97035E-15 | 1.13625E-18 |
| P01902           | H2-K1     | H-2 class I histocompatibility antigen, K-D alpha chain                       | 345.838            | 33.15    | 41490  | 11        | 0            | 1.164794807   | 0.21730432  | 9.72367E-34 | 6.03285E-47 |
| P05063           | Aldoc     | Fructose-bisphosphate aldolase C                                              | 1174.329           | 80.17    | 39395  | 30        | 0            | 0.897673154   | 0.054065425 | 9.93139E-55 | 5.86034E-93 |
| P05064           | Aldoa     | Fructose-bisphosphate aldolase A                                              | 1657.605           | 92.31    | 39356  | 40        | 0            | 0.917053025   | 0.19007698  | 8.4882E-42  | 8.62523E-62 |
| P06745           | Gpi       | Glucose-6-phosphate isomerase                                                 | 1529.065           | 69.53    | 62767  | 39        | 0            | 0.956501712   | 0.31817293  | 0.61475177  | 0.16266973  |
| P08113           | Hsp90b1   | Endoplasmic                                                                   | 1785.373           | 54.49    | 92476  | 49        | 0            | 1.033435631   | 0.21730432  | 3.33874E-34 | 9.53284E-48 |
| P08752           | Gnai2     | Guanine nucleotide-binding protein G(i) subunit alpha-2                       | 1256.755           | 69.86    | 40489  | 26        | 0            | 0.89378071    | 0.19007698  | 7.84297E-43 | 7.17829E-64 |
| P08775           | Polr2a    | DNA-directed RNA polymerase II subunit RPB1                                   | 350.364            | 7.41     | 217176 | 10        | 0            | 0.865504602   | 0.25788439  | 4.23775E-17 | 1.94236E-21 |
| P09528           | Fth1      | Ferritin heavy chain                                                          | 222.436            | 41.21    | 21067  | 6         | 0            | 1.285977137   | 0.075061067 | 1.94894E-54 | 6.31071E-92 |
| P10711           | Tcea1     | Transcription elongation factor A protein 1                                   | 175.251            | 20.93    | 33880  | 4         | 0            | 0.448016733   | 0.21319152  | 2.23498E-35 | 8.4609E-50  |
| P11598           | Pdia3     | Protein disulfide-isomerase A3                                                | 945.818            | 52.28    | 56623  | 26        | 0            | 1.078688558   | 0.19007698  | 2.2946E-47  | 2.43873E-73 |
| P11835           | Itgb2     | Integrin beta-2                                                               | 1205.242           | 41.76    | 85026  | 25        | 0            | 0.871278553   | 0.19007698  | 1.29006E-43 | 1.82672E-65 |
| P13020           | Gsn       | Gelsolin                                                                      | 1819.541           | 61.03    | 85942  | 44        | 0            | 0.906421704   | 0.19007698  | 3.83853E-44 | 1.50279E-66 |
| P14069           | S100a6    | Protein S100-A6                                                               | 189.18             | 78.65    | 10051  | 6         | 0            | 0.766567122   | 0.19007698  | 1.22202E-47 | 6.22557E-74 |
| P14152           | Mdh1      | Malate dehydrogenase, cytoplasmic                                             | 618.435            | 47.6     | 36511  | 13        | 0            | 0.929614466   | 0.19007698  | 4.69237E-42 | 2.63898E-62 |
| P16460           | Ass1      | Argininosuccinate synthase                                                    | 229.08             | 26.21    | 46584  | 10        | 0            | 1.408366188   | 0.19007698  | 1.42635E-42 | 2.40972E-63 |

|        |         |                                                                                                                 |          |       |        |    |   |             |             |             |             |
|--------|---------|-----------------------------------------------------------------------------------------------------------------|----------|-------|--------|----|---|-------------|-------------|-------------|-------------|
| P17742 | Ppia    | Peptidyl-prolyl cis-trans isomerase A                                                                           | 1008.804 | 71.34 | 17971  | 20 | 0 | 0.899337986 | 0.0235938   | 3.3236E-56  | 7.62619E-99 |
| P21575 | Dnm1    | Dynamin-1                                                                                                       | 42.89    | 3.94  | 97295  | 4  | 0 | 1.097507022 | 0.20548165  | 1.6246E-39  | 2.25866E-57 |
| P24051 | Rps27l  | 40S ribosomal protein S27-like                                                                                  | 146.25   | 25    | 9477   | 3  | 0 | 0.826258334 | 0.048095791 | 5.05192E-55 | 4.98947E-94 |
| P27867 | Sord    | Sorbitol dehydrogenase                                                                                          | 47.078   | 7.28  | 38235  | 2  | 0 | 0.891187628 | 0.13937684  | 1.49845E-51 | 1.91913E-83 |
| P28798 | Grn     | Granulins                                                                                                       | 274.292  | 20.54 | 63458  | 9  | 0 | 0.61930017  | 0.19007698  | 1.50305E-46 | 1.36729E-71 |
| P29391 | Ftl1    | Ferritin light chain 1                                                                                          | 365.894  | 55.74 | 20802  | 7  | 0 | 1.33053224  | 0.26575971  | 5.73344E-16 | 6.54364E-20 |
| P30681 | Hmgb2   | High mobility group protein B2                                                                                  | 399.936  | 29.05 | 24162  | 10 | 0 | 0.852623927 | 0.14885417  | 1.06284E-50 | 3.21073E-81 |
| P32020 | Scp2    | Non-specific lipid-transfer protein                                                                             | 78.683   | 5.3   | 59126  | 3  | 0 | 0.788356734 | 0.19007698  | 2.76273E-41 | 9.06199E-61 |
| P34884 | Mif     | Macrophage migration inhibitory factor                                                                          | 364.546  | 71.3  | 12504  | 8  | 0 | 0.721635942 | 0.19007698  | 2.3587E-43  | 6.28867E-65 |
| P34960 | Mmp12   | Macrophage metalloelastase                                                                                      | 124.013  | 12.26 | 54971  | 5  | 0 | 1.539224247 | 0.19007698  | 1.82635E-48 | 8.92547E-76 |
| P35700 | Prdx1   | Peroxiredoxin-1                                                                                                 | 593.265  | 64.82 | 22176  | 20 | 0 | 1.112919429 | 0.19007698  | 2.80234E-46 | 5.09651E-71 |
| P42667 | Sec11a  | Signal peptidase complex catalytic subunit SEC11A                                                               | 70.665   | 16.2  | 20599  | 4  | 0 | 1.138299919 | 0.19007698  | 6.49656E-48 | 1.53694E-74 |
| P47791 | Gsr     | Glutathione reductase, mitochondrial                                                                            | 264.542  | 25.8  | 53663  | 7  | 0 | 0.934307942 | 0.19007698  | 2.08826E-44 | 4.24836E-67 |
| P48036 | Anxa5   | Annexin A5                                                                                                      | 1571.408 | 83.39 | 35752  | 38 | 0 | 1.129761056 | 0.13141194  | 2.83999E-53 | 3.42738E-88 |
| P50543 | S100a11 | Protein S100-A11                                                                                                | 164.439  | 71.43 | 11083  | 4  | 0 | 0.773037747 | 0.20737785  | 2.4875E-36  | 1.66111E-51 |
| P51859 | Hdgf    | Hepatoma-derived growth factor                                                                                  | 165.045  | 31.22 | 26269  | 7  | 0 | 0.846730763 | 0.25546543  | 4.2253E-18  | 8.25101E-23 |
| P54822 | Adsl    | Adenylosuccinate lyase                                                                                          | 453.506  | 35.12 | 54866  | 11 | 0 | 0.896985899 | 0.30059583  | 8.3726E-06  | 3.18165E-07 |
| P55302 | Lrpap1  | Alpha-2-macroglobulin receptor-associated protein                                                               | 230.143  | 22.5  | 42215  | 7  | 0 | 1.182569906 | 0.14885417  | 7.4198E-50  | 4.10885E-79 |
| P59325 | Elf5    | Eukaryotic translation initiation factor 5                                                                      | 111.347  | 7.46  | 48968  | 4  | 0 | 0.888638808 | 0.21730432  | 3.87268E-32 | 3.07881E-44 |
| P60335 | Pcbp1   | Poly(rC)-binding protein 1                                                                                      | 636.305  | 63.48 | 37498  | 14 | 0 | 0.8335091   | 0.19007698  | 2.58938E-42 | 8.01417E-63 |
| P60766 | Cdc42   | Cell division control protein 42 homolog                                                                        | 384.278  | 58.12 | 21259  | 9  | 0 | 0.821026933 | 0.21730432  | 1.95112E-34 | 3.75513E-48 |
| P60843 | Elf4a1  | Eukaryotic initiation factor 4A-I                                                                               | 1018.101 | 54.93 | 46154  | 24 | 0 | 1.085676355 | 0.3759886   | 1           | 0.99998262  |
| P60867 | Rps20   | 40S ribosomal protein S20                                                                                       | 130.94   | 28.57 | 13373  | 4  | 0 | 0.772099227 | 0.022124067 | 4.2385E-57  | 5.3311E-103 |
| P62774 | Mtpn    | Myotrophin                                                                                                      | 279.736  | 75.42 | 12861  | 5  | 0 | 0.749382254 | 0.26627283  | 7.07726E-15 | 1.80937E-18 |
| P62830 | Rpl23   | 60S ribosomal protein L23                                                                                       | 191.96   | 50    | 14865  | 7  | 0 | 0.915340671 | 0.14885417  | 1.41308E-49 | 2.02197E-78 |
| P62869 | Elob    | Elongin-B                                                                                                       | 274.104  | 59.32 | 13170  | 7  | 0 | 0.851529511 | 0.20548165  | 5.11777E-40 | 2.53701E-58 |
| P63323 | Rps12   | 40S ribosomal protein S12                                                                                       | 225.662  | 45.45 | 14525  | 6  | 0 | 0.8063337   | 0.079171354 | 7.46598E-54 | 5.07238E-90 |
| P68033 | Actc1   | Actin, alpha cardiac muscle 1                                                                                   | 1232.137 | 40.58 | 42019  | 30 | 0 | 1.1038074   | 0.19007698  | 6.14763E-45 | 3.33583E-68 |
| P70340 | Smad1   | Mothers against decapentaplegic homolog 1                                                                       | 42.288   | 8.17  | 52157  | 2  | 0 | 0.635624247 | 0.30513796  | 0.000231415 | 1.48166E-05 |
| P97429 | Anxa4   | Annexin A4                                                                                                      | 866.33   | 67.71 | 35916  | 20 | 0 | 1.185125351 | 0.20548165  | 8.92814E-41 | 8.9825E-60  |
| P97821 | Ctsc    | Dipeptidyl peptidase 1                                                                                          | 238.605  | 18.18 | 52376  | 7  | 0 | 0.798001626 | 0.18417611  | 5.09813E-49 | 4.71151E-77 |
| P97874 | Gak     | Cyclin-G-associated kinase                                                                                      | 63.416   | 2.91  | 143703 | 2  | 0 | 1.267689151 | 0.20737785  | 1.53577E-37 | 1.06403E-53 |
| Q01205 | Dlst    | Dihydrolipoylysine-residue succinyltransferase component of 2-oxoglutarate dehydrogenase complex, mitochondrial | 264.324  | 19.16 | 48925  | 8  | 0 | 1.153323641 | 0.20737785  | 2.69012E-37 | 2.96102E-53 |
| Q04750 | Top1    | DNA topoisomerase 1                                                                                             | 324.79   | 22.69 | 90876  | 14 | 0 | 0.836048306 | 0.25788439  | 1.3087E-16  | 8.96325E-21 |
| Q04899 | Cdk18   | Cyclin-dependent kinase 18                                                                                      | 112.94   | 10.64 | 51848  | 4  | 0 | 1.404300606 | 0.13937684  | 4.02343E-52 | 5.76702E-85 |
| Q04931 | Ssrp1   | FACT complex subunit SSRP1                                                                                      | 364.482  | 25.81 | 80914  | 12 | 0 | 0.89580918  | 0.24413627  | 2.27351E-20 | 5.21678E-26 |
| Q3UQ44 | Iqgap2  | Ras GTPase-activating-like protein IQGAP2                                                                       | 68.925   | 2.16  | 180528 | 4  | 0 | 1.161738739 | 0.13937684  | 2.88415E-51 | 1.08847E-82 |
| Q3UW53 | Fam129a | Protein Niban                                                                                                   | 737.731  | 34.99 | 102649 | 25 | 0 | 0.936900574 | 0.14885417  | 3.88912E-50 | 8.26178E-80 |
| Q501J6 | Ddx17   | Probable ATP-dependent RNA helicase DDX17                                                                       | 518.414  | 21.23 | 72399  | 11 | 0 | 0.886215268 | 0.047137948 | 2.56531E-55 | 3.99693E-95 |
| Q5FWK3 | Arhgap1 | Rho GTPase-activating protein 1                                                                                 | 222.831  | 31.89 | 50411  | 9  | 0 | 0.698145128 | 0.22950591  | 6.40192E-26 | 2.94971E-34 |

|        |         |                                                          |          |       |        |    |   |             |             |             |             |
|--------|---------|----------------------------------------------------------|----------|-------|--------|----|---|-------------|-------------|-------------|-------------|
| Q60631 | Grb2    | Growth factor receptor-bound protein 2                   | 219.982  | 46.54 | 25238  | 8  | 0 | 1.093551069 | 0.15367011  | 2.68641E-49 | 9.88764E-78 |
| Q61191 | Hcfc1   | Host cell factor 1                                       | 498.608  | 10.12 | 210437 | 13 | 0 | 0.88861105  | 0.21730432  | 2.8683E-29  | 1.43925E-39 |
| Q61207 | Psap    | Prosaposin                                               | 294.177  | 14.54 | 61422  | 7  | 0 | 0.787122054 | 0.30547343  | 0.10598378  | 0.018694137 |
| Q61210 | Arhgef1 | Rho guanine nucleotide exchange factor 1                 | 557.637  | 26.09 | 102805 | 17 | 0 | 0.915925148 | 0.20737785  | 8.20969E-37 | 2.25147E-52 |
| Q61749 | Eif2b4  | Translation initiation factor eIF-2B subunit delta       | 64.619   | 7.25  | 57624  | 2  | 0 | 0.431785992 | 0.32376711  | 1           | 0.53526425  |
| Q62193 | Rpa2    | Replication protein A 32 kDa subunit                     | 79.469   | 13.7  | 29718  | 2  | 0 | 0.656031223 | 0.022124067 | 8.43542E-57 | 1.4591E-101 |
| Q64514 | Tpp2    | Tripeptidyl-peptidase 2                                  | 740.218  | 25.91 | 139879 | 24 | 0 | 0.931966117 | 0.24413627  | 1.83456E-21 | 1.40837E-27 |
| Q64620 | Ppp6c   | Serine/threonine-protein phosphatase 6 catalytic subunit | 117.876  | 19.02 | 35159  | 5  | 0 | 0.884688172 | 0.20737785  | 4.31829E-36 | 4.4772E-51  |
| Q68FD5 | Cltc    | Clathrin heavy chain 1                                   | 4079.117 | 65.73 | 191557 | 96 | 0 | 0.921387776 | 0.21730432  | 8.86351E-28 | 3.50657E-37 |
| Q6IMY8 | Hnrnpu  | Heterogeneous nuclear ribonucleoprotein U                | 1237.314 | 46.87 | 87732  | 34 | 0 | 0.919004705 | 0.24163074  | 2.14046E-22 | 6.14911E-29 |
| Q6NWW9 | Fndc3b  | Fibronectin type III domain-containing protein 3B        | 80.396   | 3.31  | 132764 | 3  | 0 | 0.751618241 | 0.2700068   | 4.24535E-13 | 3.71908E-16 |
| Q6P549 | Inpp1   | Phosphatidylinositol 3,4,5-trisphosphate 5-phosphatase 2 | 207.803  | 7.4   | 138973 | 6  | 0 | 1.102664536 | 0.21730432  | 1.13816E-34 | 1.47371E-48 |
| Q6TUG0 | Dnajb11 | DnaJ homolog subfamily B member 11                       | 290.148  | 30.17 | 40495  | 7  | 0 | 1.143332857 | 0.23103754  | 1.62416E-25 | 1.2399E-33  |
| Q6ZQ38 | Cand1   | Cullin-associated NEDD8-dissociated protein 1            | 877.807  | 33.66 | 136332 | 29 | 0 | 0.962876329 | 0.29414201  | 5.00468E-08 | 7.47404E-10 |
| Q78P75 | Dynll2  | Dynein light chain 2, cytoplasmic                        | 86.955   | 25.84 | 10350  | 2  | 0 | 0.719928788 | 0.19007698  | 3.32669E-45 | 9.25185E-69 |
| Q792H5 | Celf2   | CUGBP Elav-like family member 2                          | 155.568  | 10.24 | 54271  | 5  | 0 | 0.836640115 | 0.19007698  | 5.21555E-46 | 1.89112E-70 |
| Q77PJ0 | Ssr1    | Translocon-associated protein subunit alpha              | 59.898   | 10.66 | 35629  | 3  | 0 | 1.196385887 | 0.33798703  | 1           | 0.95198661  |
| Q8BH61 | F13a1   | Coagulation factor XIII A chain                          | 164.935  | 14.48 | 83207  | 9  | 0 | 0.562158101 | 0.30513796  | 0.000161183 | 9.77704E-06 |
| Q8BHN3 | Ganab   | Neutral alpha-glucosidase AB                             | 999.162  | 43.64 | 106911 | 31 | 0 | 1.077496556 | 0.13937684  | 7.77146E-52 | 3.35941E-84 |
| Q8BK67 | Rcc2    | Protein RCC2                                             | 650.406  | 48.27 | 55983  | 19 | 0 | 0.859099982 | 0.19007698  | 4.3049E-43  | 2.13036E-64 |
| Q8BP48 | Metap1  | Methionine aminopeptidase 1                              | 116.45   | 12.95 | 43221  | 3  | 0 | 0.62447758  | 0.21730432  | 1.05879E-29 | 2.8999E-40  |
| Q8BPU7 | Elmo1   | Engulfment and cell motility protein 1                   | 416.403  | 28.61 | 83936  | 16 | 0 | 0.767226417 | 0.21730432  | 6.6274E-35  | 5.75061E-49 |
| Q8BSY0 | Asph    | Aspartyl/asparaginyl beta-hydroxylase                    | 677.992  | 35.76 | 83042  | 22 | 0 | 1.096959946 | 0.20548165  | 2.86473E-40 | 8.41248E-59 |
| Q8BT18 | Srrm2   | Serine/arginine repetitive matrix protein 2              | 362.852  | 6.4   | 294840 | 11 | 0 | 0.567063723 | 0.13141194  | 5.52438E-53 | 2.29869E-87 |
| Q8BVF2 | Pdcl3   | Phosducin-like protein 3                                 | 109.738  | 18.33 | 27581  | 3  | 0 | 0.806282156 | 0.21730432  | 2.81154E-33 | 3.695E-46   |
| Q8K0F1 | Tbc1d23 | TBC1 domain family member 23                             | 84.48    | 7.02  | 76426  | 2  | 0 | 0.694888001 | 0.14885417  | 5.54148E-51 | 6.06013E-82 |
| Q8QZY1 | Eif3l   | Eukaryotic translation initiation factor 3 subunit L     | 688.491  | 35.64 | 66613  | 16 | 0 | 1.108691595 | 0.24163074  | 5.08299E-22 | 2.1795E-28  |
| Q8VCN5 | Cth     | Cystathionine gamma-lyase                                | 349.244  | 29.9  | 43567  | 8  | 0 | 1.332107743 | 0.079171354 | 3.81791E-54 | 5.84577E-91 |
| Q91YR9 | Ptgr1   | Prostaglandin reductase 1                                | 329.123  | 36.47 | 35560  | 9  | 0 | 0.74835585  | 0.14885417  | 2.0349E-50  | 1.64629E-80 |
| Q924Z4 | Cers2   | Ceramide synthase 2                                      | 118.544  | 11.84 | 45024  | 3  | 0 | 1.27841818  | 0.36932998  | 1           | 0.99986935  |
| Q99KP3 | Cryl1   | Lambda-crystallin homolog                                | 80.371   | 14.42 | 35209  | 3  | 0 | 0.884253083 | 0.25425995  | 2.85856E-18 | 4.80724E-23 |
| Q99PD4 | Arpc1a  | Actin-related protein 2/3 complex subunit 1A             | 94.403   | 9.46  | 41599  | 3  | 0 | 0.729192917 | 0.20737785  | 4.7037E-37  | 8.18201E-53 |
| Q9CPU0 | Glo1    | Lactoylglutathione lyase                                 | 134.222  | 36.96 | 20810  | 6  | 0 | 0.914009045 | 0.20548165  | 4.97092E-41 | 2.90438E-60 |
| Q9CQW9 | Ifitm3  | Interferon-induced transmembrane protein 3               | 116.3    | 36.5  | 14954  | 3  | 0 | 1.260239649 | 0.21730432  | 4.7679E-33  | 9.03159E-46 |
| Q9CZU6 | Cs      | Citrate synthase, mitochondrial                          | 529.968  | 37.93 | 51737  | 16 | 0 | 1.057230626 | 0.20548165  | 1.6007E-40  | 2.76753E-59 |
| Q9D0F6 | Rfc5    | Replication factor C subunit 5                           | 98.822   | 15.63 | 38096  | 3  | 0 | 0.851420698 | 0.21730432  | 3.35621E-28 | 7.40925E-38 |
| Q9D0G0 | Mrps30  | 28S ribosomal protein S30, mitochondrial                 | 101.961  | 9.05  | 49939  | 2  | 0 | 0.771268276 | 0.24413627  | 1.76023E-19 | 9.57315E-25 |
| Q9D2V7 | Coro7   | Coronin-7                                                | 315.235  | 17.25 | 100812 | 9  | 0 | 0.895847579 | 0.033029055 | 1.30035E-55 | 2.67466E-96 |
| Q9DAR7 | Dcps    | m7GpppX diphosphatase                                    | 396.432  | 47.93 | 38988  | 11 | 0 | 0.915625723 | 0.24413627  | 1.50145E-20 | 2.88368E-26 |
| Q9DBR3 | Armc8   | Armadillo repeat-containing protein 8                    | 79.415   | 9.81  | 75364  | 4  | 0 | 0.851557407 | 0.20737785  | 2.82694E-38 | 4.73503E-55 |
| Q9DCL9 | Paics   | Multifunctional protein ADE2                             | 428.915  | 45.41 | 47006  | 13 | 0 | 0.883671184 | 0.30513796  | 0.016393867 | 0.002052137 |

|        |         |                                                                      |          |       |        |     |   |             |            |             |             |
|--------|---------|----------------------------------------------------------------------|----------|-------|--------|-----|---|-------------|------------|-------------|-------------|
| Q9DCX2 | Atp5pd  | ATP synthase subunit d, mitochondrial                                | 201.244  | 54.04 | 18749  | 6   | 0 | 0.892459328 | 0.19007698 | 7.04325E-44 | 5.26919E-66 |
| Q9EPB4 | Pycard  | Apoptosis-associated speck-like protein containing a CARD            | 197.84   | 36.79 | 21459  | 6   | 0 | 0.841254737 | 0.26627283 | 3.48412E-15 | 7.11934E-19 |
| Q9EQ32 | Pik3ap1 | Phosphoinositide 3-kinase adapter protein 1                          | 749.784  | 26.63 | 90928  | 18  | 0 | 0.859744459 | 0.19007698 | 1.13405E-44 | 1.19358E-67 |
| Q9ESY9 | Ifi30   | Gamma-interferon-inducible lysosomal thiol reductase                 | 195.149  | 20.97 | 27784  | 6   | 0 | 0.677976041 | 0.0235938  | 1.67586E-56 | 3.8105E-100 |
| Q9JHS3 | Lamtor2 | Ragulator complex protein LAMTOR2                                    | 122.42   | 21.6  | 13480  | 2   | 0 | 0.577106017 | 0.13358441 | 2.07933E-52 | 9.34414E-86 |
| Q9JKF1 | Iqgap1  | Ras GTPase-activating-like protein IQGAP1                            | 3899.36  | 65.42 | 188742 | 92  | 0 | 1.102472694 | 0.23342411 | 9.78772E-24 | 6.26599E-31 |
| Q9JLJ2 | Aldh9a1 | 4-trimethylaminobutyraldehyde dehydrogenase                          | 687.374  | 69.64 | 53515  | 21  | 0 | 0.958831319 | 0.19007698 | 3.44761E-48 | 3.75412E-75 |
| Q9QZQ8 | H2afy   | Core histone macro-H2A.1                                             | 155.609  | 18.01 | 39735  | 5   | 0 | 1.07710626  | 0.26575971 | 8.25615E-16 | 1.06256E-19 |
| Q9WTP6 | Ak2     | Adenylate kinase 2, mitochondrial                                    | 334.009  | 47.28 | 26469  | 8   | 0 | 0.904475564 | 0.32961405 | 1           | 0.63841845  |
| Q9WUM5 | Succlg1 | Succinate--CoA ligase [ADP/GDP-forming] subunit alpha, mitochondrial | 257.113  | 25.72 | 36155  | 7   | 0 | 0.861061759 | 0.19007698 | 9.65787E-49 | 2.09158E-76 |
| Q9WVQ5 | Apip    | Methylthioribulose-1-phosphate dehydratase                           | 113.666  | 9.13  | 26949  | 2   | 0 | 0.851251469 | 0.21730432 | 3.88007E-30 | 5.73343E-41 |
| Q9Z0J0 | Npc2    | NPC intracellular cholesterol transporter 2                          | 140.289  | 41.61 | 16442  | 5   | 0 | 0.783300611 | 0.27534881 | 1.04594E-11 | 2.23698E-14 |
| E9Q7G0 | Numa1   | Nuclear mitotic apparatus protein 1                                  | 1707.656 | 34.62 | 235630 | 48  | 1 | 0.929641415 | 0.30513796 | 5.20087E-05 | 2.65604E-06 |
| O08807 | Prdx4   | Peroxiredoxin-4                                                      | 341.044  | 54.74 | 31053  | 12  | 1 | 1.173508932 | 0.19007698 | 1.53272E-41 | 2.80432E-61 |
| O35737 | Hnmp1   | Heterogeneous nuclear ribonucleoprotein H                            | 631.314  | 41.2  | 49199  | 14  | 1 | 0.904594749 | 0.21003578 | 1.2944E-35  | 3.20056E-50 |
| O55173 | Pdpk1   | 3-phosphoinositide-dependent protein kinase 1                        | 52.966   | 4.47  | 63593  | 2   | 1 | 0.596221732 | 0.25788439 | 2.89921E-17 | 1.1584E-21  |
| O70439 | Stx7    | Syntaxin-7                                                           | 430.805  | 44.83 | 29821  | 8   | 1 | 0.927133043 | 0.28507094 | 6.17947E-09 | 5.94154E-11 |
| P01901 | H2-K1   | H-2 class I histocompatibility antigen, K-B alpha chain              | 85.959   | 9.21  | 41302  | 4   | 1 | 1.117417985 | 0.32376711 | 1           | 0.49984662  |
| P06151 | Ldha    | L-lactate dehydrogenase A chain                                      | 1682.741 | 84.64 | 36499  | 35  | 1 | 0.929243565 | 0.29433913 | 2.82228E-07 | 5.85466E-09 |
| P06339 | H2-T23  | H-2 class I histocompatibility antigen, D-37 alpha chain             | 147.539  | 8.68  | 40875  | 3   | 1 | 1.182345467 | 0.27894049 | 1.42609E-11 | 3.3096E-14  |
| P08753 | Gnai3   | Guanine nucleotide-binding protein G(k) subunit alpha                | 420.479  | 29.94 | 40522  | 10  | 1 | 0.878366576 | 0.21730432 | 5.70293E-34 | 2.4042E-47  |
| P19783 | Cox4i1  | Cytochrome c oxidase subunit 4 isoform 1, mitochondrial              | 181.422  | 30.77 | 19530  | 5   | 1 | 1.065006288 | 0.24163074 | 7.81132E-22 | 4.07853E-28 |
| P25976 | Ubtf    | Nucleolar transcription factor 1                                     | 64.217   | 6.54  | 89509  | 4   | 1 | 0.739498768 | 0.20737785 | 9.0661E-39  | 5.72539E-56 |
| P26039 | Tln1    | Talin-1                                                              | 5661.689 | 64.62 | 269821 | 120 | 1 | 0.976991675 | 0.25785466 | 1.97977E-17 | 6.88355E-22 |
| P27008 | Parp1   | Poly [ADP-ribose] polymerase 1                                       | 679.782  | 24.85 | 112660 | 16  | 1 | 0.919689781 | 0.20737785 | 1.60235E-38 | 1.65416E-55 |
| P27773 | Pdia3   | Protein disulfide-isomerase A3                                       | 1310.895 | 67.33 | 56678  | 34  | 1 | 1.046527292 | 0.21730432 | 5.09857E-31 | 2.12707E-42 |
| P32921 | Wars    | Tryptophan--tRNA ligase, cytoplasmic                                 | 342.969  | 29.73 | 54358  | 10  | 1 | 1.157309994 | 0.30513796 | 0.012704669 | 0.001522726 |
| P36536 | Sar1a   | GTP-binding protein SAR1a                                            | 121.468  | 27.27 | 22371  | 3   | 1 | 0.637932946 | 0.30513796 | 0.001071466 | 8.63757E-05 |
| P43883 | Plin2   | Perilipin-2                                                          | 41.644   | 6.35  | 46646  | 2   | 1 | 1.86808436  | 0.32135255 | 0.85951591  | 0.2518881   |
| P47911 | Rpl6    | 60S ribosomal protein L6                                             | 224.616  | 24.32 | 33510  | 7   | 1 | 1.182681073 | 0.40804158 | 1           | 0.99999997  |
| P50429 | Arsb    | Arylsulfatase B                                                      | 484.17   | 37.83 | 59647  | 14  | 1 | 0.844875141 | 0.2682679  | 4.02736E-14 | 1.76379E-17 |
| P60710 | Actb    | Actin, cytoplasmic 1                                                 | 3245.62  | 90.93 | 41737  | 62  | 1 | 1.067602774 | 0.21730432 | 1.26162E-28 | 1.54549E-38 |
| P61205 | Arf3    | ADP-ribosylation factor 3                                            | 661.188  | 58.56 | 20601  | 14  | 1 | 1.092594191 | 0.21730432 | 2.34246E-30 | 2.53209E-41 |
| P62245 | Rps15a  | 40S ribosomal protein S15a                                           | 335.051  | 71.54 | 14840  | 13  | 1 | 0.93388564  | 0.23342411 | 5.76886E-23 | 8.85177E-30 |
| P62317 | Snrpd2  | Small nuclear ribonucleoprotein Sm D2                                | 180.707  | 52.54 | 13527  | 7   | 1 | 0.873362345 | 0.19007698 | 9.68966E-46 | 6.97624E-70 |
| P63001 | Rac1    | Ras-related C3 botulinum toxin substrate 1                           | 404.337  | 54.17 | 21450  | 9   | 1 | 0.781259368 | 0.21730432 | 1.65493E-33 | 1.50393E-46 |

|        |          |                                                                          |          |       |        |    |   |             |            |             |             |
|--------|----------|--------------------------------------------------------------------------|----------|-------|--------|----|---|-------------|------------|-------------|-------------|
| P63213 | Gng2     | Guanine nucleotide-binding protein G(I)/G(S)/G(O) subunit gamma-2        | 99.828   | 49.3  | 7850   | 3  | 1 | 0.839095217 | 0.23342411 | 2.38497E-23 | 2.36888E-30 |
| P63245 | Rack1    | Receptor of activated protein C kinase 1                                 | 898.447  | 82.02 | 35077  | 20 | 1 | 0.905584905 | 0.25788439 | 9.00359E-17 | 5.40094E-21 |
| P63259 | Actg1    | Actin, cytoplasmic 2                                                     | 3229.127 | 90.93 | 41793  | 61 | 1 | 1.068615526 | 0.21730432 | 6.41531E-30 | 1.29356E-40 |
| P83868 | Ptges3   | Prostaglandin E synthase 3                                               | 136.366  | 26.25 | 18721  | 3  | 1 | 0.701389709 | 0.36311283 | 1           | 0.99966826  |
| P83870 | Phf5a    | PHD finger-like domain-containing protein 5A                             | 32.466   | 21.82 | 12405  | 2  | 1 | 0.567198852 | 0.30547343 | 0.042172257 | 0.006243256 |
| Q07984 | Ssr4     | Translocon-associated protein subunit delta                              | 153.742  | 30.64 | 18980  | 4  | 1 | 1.268839368 | 0.24413627 | 6.51219E-21 | 8.71359E-27 |
| Q3U1J4 | Ddb1     | DNA damage-binding protein 1                                             | 492.801  | 19.56 | 126853 | 16 | 1 | 0.901877493 | 0.20548165 | 2.88679E-39 | 6.67813E-57 |
| Q3V0K9 | Pls1     | Plastin-1                                                                | 323.882  | 11.59 | 70408  | 9  | 1 | 1.089921318 | 0.26244782 | 2.74948E-16 | 2.44559E-20 |
| Q571I9 | Aldh16a1 | Aldehyde dehydrogenase family 16 member A1                               | 241.958  | 13.47 | 84756  | 7  | 1 | 0.88151529  | 0.21730432 | 8.07095E-33 | 2.20012E-45 |
| Q60973 | Rbbp7    | Histone-binding protein RBBP7                                            | 381.971  | 45.18 | 47790  | 13 | 1 | 0.941652781 | 0.28507094 | 1.7857E-08  | 2.15388E-10 |
| Q61686 | Cbx5     | Chromobox protein homolog 5                                              | 139.648  | 18.85 | 22186  | 3  | 1 | 0.874662241 | 0.20737785 | 4.9785E-38  | 1.35093E-54 |
| Q61990 | Pcbp2    | Poly(rC)-binding protein 2                                               | 555.288  | 49.17 | 38222  | 13 | 1 | 0.897887996 | 0.21730432 | 1.36376E-32 | 5.32141E-45 |
| Q63584 | Tmed10   | Transmembrane emp24 domain-containing protein 10                         | 373.401  | 35.16 | 24858  | 7  | 1 | 1.084705903 | 0.2558024  | 9.18024E-18 | 2.40069E-22 |
| Q68FL6 | Mars     | Methionine--tRNA ligase, cytoplasmic                                     | 594.832  | 28.49 | 101431 | 15 | 1 | 0.860164429 | 0.22884711 | 2.50504E-26 | 6.87386E-35 |
| Q6DFW4 | Nop58    | Nucleolar protein 58                                                     | 431.638  | 23.51 | 60343  | 9  | 1 | 0.906899943 | 0.21730432 | 2.3238E-27  | 1.63923E-36 |
| Q6PDG5 | Smarcc2  | SWI/SNF complex subunit SMARCC2                                          | 128.747  | 5.94  | 132604 | 5  | 1 | 0.850354161 | 0.24413627 | 7.80611E-20 | 3.01974E-25 |
| Q6TEK4 | Vkorc1   | Vitamin K epoxide reductase complex subunit 1                            | 78.781   | 19.25 | 17783  | 2  | 1 | 0.772560853 | 0.21730432 | 1.43647E-27 | 7.59311E-37 |
| Q6ZWQ7 | Spcs3    | Signal peptidase complex subunit 3                                       | 55.049   | 17.78 | 20313  | 3  | 1 | 1.131968789 | 0.30513796 | 7.6412E-05  | 4.14E-06    |
| Q794E4 | Hnmpf    | Heterogeneous nuclear ribonucleoprotein F                                | 906.329  | 65.78 | 45730  | 19 | 1 | 0.92467834  | 0.19007698 | 4.30096E-47 | 9.5017E-73  |
| Q80UJ7 | Rab3gap1 | Rab3 GTPase-activating protein catalytic subunit                         | 70.334   | 6.01  | 110198 | 3  | 1 | 0.927469132 | 0.30513796 | 0.000134131 | 7.91449E-06 |
| Q8BUM3 | Ptpn7    | Tyrosine-protein phosphatase non-receptor type 7                         | 193.124  | 21.73 | 40351  | 5  | 1 | 0.885579565 | 0.30513796 | 0.00273087  | 0.000254891 |
| Q8BZW8 | Nhlrc2   | NHL repeat-containing protein 2                                          | 86.826   | 3.17  | 78430  | 2  | 1 | 1.489667127 | 0.30468754 | 2.35443E-05 | 1.06141E-06 |
| Q8CGK3 | Lonp1    | Lon protease homolog, mitochondrial                                      | 813.421  | 32.67 | 105843 | 22 | 1 | 1.102458889 | 0.28507094 | 1.57116E-09 | 1.12367E-11 |
| Q8R2U0 | Seh1l    | Nucleoporin SEH1                                                         | 78.308   | 14.17 | 39775  | 4  | 1 | 1.131650492 | 0.21730432 | 2.30021E-32 | 1.28304E-44 |
| Q8VCT3 | Rnpep    | Aminopeptidase B                                                         | 1034.075 | 55.85 | 72416  | 27 | 1 | 0.919007372 | 0.2700068  | 5.89883E-13 | 5.67835E-16 |
| Q8VDL4 | Adpgk    | ADP-dependent glucokinase                                                | 153.351  | 11.69 | 53902  | 4  | 1 | 1.143296045 | 0.30044021 | 5.46268E-06 | 1.93092E-07 |
| Q8VDM6 | Hnmpul1  | Heterogeneous nuclear ribonucleoprotein U-like protein 1                 | 336.085  | 17.23 | 96002  | 11 | 1 | 0.82404115  | 0.30351064 | 1.92199E-05 | 8.38378E-07 |
| Q8VIJ6 | Sfpq     | Splicing factor, proline- and glutamine-rich                             | 665.644  | 31.9  | 75442  | 18 | 1 | 0.915796431 | 0.34568264 | 1           | 0.99161318  |
| Q91YH5 | Ati3     | Atlastin-3                                                               | 275.605  | 21.44 | 60575  | 7  | 1 | 1.169822729 | 0.30513796 | 0.018570175 | 0.002375411 |
| Q91YQ5 | Rpn1     | Dolichyl-diphosphooligosaccharide--protein glycosyltransferase subunit 1 | 874.429  | 46.71 | 68528  | 22 | 1 | 1.074921917 | 0.19007698 | 1.79699E-45 | 2.54773E-69 |
| Q91ZX7 | Lrp1     | Prolow-density lipoprotein receptor-related protein 1                    | 2764.038 | 22.4  | 504742 | 73 | 1 | 0.885694922 | 0.21730432 | 7.71407E-29 | 7.02882E-39 |
| Q99NB9 | Sf3b1    | Splicing factor 3B subunit 1                                             | 1219.249 | 29.6  | 145816 | 30 | 1 | 0.934063113 | 0.23103754 | 2.57986E-25 | 2.52113E-33 |
| Q9CSN1 | Snw1     | SNW domain-containing protein 1                                          | 136.612  | 9.33  | 61475  | 3  | 1 | 0.885455112 | 0.30547343 | 0.026689309 | 0.003639243 |
| Q9DC50 | Crot     | Peroxisomal carnitine O-octanoyltransferase                              | 63.466   | 6.54  | 70264  | 2  | 1 | 0.660754714 | 0.24657069 | 3.93986E-19 | 2.99843E-24 |
| Q9JHJ3 | GImp     | Glycosylated lysosomal membrane protein                                  | 116.49   | 13.12 | 43804  | 3  | 1 | 0.813000595 | 0.19007698 | 8.04737E-47 | 3.62111E-72 |
| Q9JKP5 | Mbnl1    | Muscleblind-like protein 1                                               | 28.027   | 6.45  | 36976  | 2  | 1 | 0.902987531 | 0.32376711 | 1           | 0.39461287  |
| Q9QWT9 | Kifc1    | Kinesin-like protein KIFC1                                               | 85.723   | 8.46  | 74153  | 4  | 1 | 0.858901013 | 0.21319152 | 3.85211E-35 | 2.21105E-49 |
| Q9QXG4 | Acss2    | Acetyl-coenzyme A synthetase, cytoplasmic                                | 116.082  | 7.42  | 78862  | 3  | 1 | 0.633892322 | 0.21730432 | 4.70813E-29 | 3.18766E-39 |
| Q9R0X4 | Acot9    | Acyl-coenzyme A thioesterase 9, mitochondrial                            | 118.054  | 18.22 | 50560  | 6  | 1 | 1.255790773 | 0.21730432 | 1.82823E-31 | 3.97487E-43 |
| Q9R233 | Tapbp    | Tapasin                                                                  | 125.12   | 16.56 | 49736  | 6  | 1 | 1.166527914 | 0.21730432 | 1.41162E-30 | 1.11432E-41 |

|        |         |                                                               |          |       |        |    |   |             |            |             |             |
|--------|---------|---------------------------------------------------------------|----------|-------|--------|----|---|-------------|------------|-------------|-------------|
| Q9Z0S1 | Bpnt1   | 3'(2'),5'-bisphosphate nucleotidase 1                         | 96.983   | 13.64 | 33196  | 3  | 1 | 0.845941076 | 0.22752045 | 3.75238E-27 | 3.52451E-36 |
| Q9Z2L7 | Crif3   | Cytokine receptor-like factor 3                               | 120.444  | 20.81 | 49559  | 4  | 1 | 0.798701327 | 0.22884711 | 4.0083E-26  | 1.42643E-34 |
| A6H5Z3 | Exoc6b  | Exocyst complex component 6B                                  | 77.214   | 5.56  | 94130  | 3  | 2 | 1.273485682 | 0.34568264 | 1           | 0.9882078   |
| B0BNM1 | Naxe    | NAD(P)H-hydrate epimerase                                     | 199.691  | 29.43 | 30891  | 4  | 2 | 0.712774135 | 0.34335689 | 1           | 0.95999631  |
| B9EJ86 | Osbpl8  | Oxysterol-binding protein-related protein 8                   | 668.143  | 27.11 | 101269 | 18 | 2 | 1.107375456 | 0.24413627 | 5.18394E-20 | 1.68871E-25 |
| E9Q1P8 | Irf2bp2 | Interferon regulatory factor 2-binding protein 2              | 130.928  | 11.58 | 59292  | 4  | 2 | 0.925494688 | 0.44788539 | 1           | 1           |
| F1M775 | Diaph1  | Protein diaphanous homolog 1                                  | 461.72   | 12.65 | 140409 | 12 | 2 | 1.123745239 | 0.2682679  | 1.11767E-13 | 6.62068E-17 |
| O35114 | Scarb2  | Lysosome membrane protein 2                                   | 48.249   | 12.97 | 54044  | 4  | 2 | 1.174255995 | 0.24163074 | 3.30152E-22 | 1.15979E-28 |
| O35239 | Ptpn9   | Tyrosine-protein phosphatase non-receptor type 9              | 99.563   | 10.29 | 67970  | 4  | 2 | 0.549169256 | 0.21730432 | 3.05586E-31 | 9.22423E-43 |
| O54774 | Ap3d1   | AP-3 complex subunit delta-1                                  | 96.886   | 5.34  | 135081 | 4  | 2 | 0.840313903 | 0.27894049 | 3.57377E-11 | 1.04728E-13 |
| O54988 | Slk     | STE20-like serine/threonine-protein kinase                    | 256.181  | 9     | 141457 | 9  | 2 | 0.869774668 | 0.20981848 | 7.48307E-36 | 1.20273E-50 |
| O70145 | Ncf2    | Neutrophil cytosol factor 2                                   | 441.898  | 43.62 | 59485  | 17 | 2 | 0.919604096 | 0.2682679  | 1.42684E-14 | 4.55048E-18 |
| O88838 | Spsb2   | SPRY domain-containing SOCS box protein 2                     | 11.784   | 6.82  | 28938  | 2  | 2 | 1.84341756  | 0.24825716 | 8.75323E-19 | 9.19938E-24 |
| P01900 | H2-D1   | H-2 class I histocompatibility antigen, D-D alpha chain       | 393.694  | 33.42 | 41110  | 12 | 2 | 1.103110134 | 0.30970752 | 0.16596425  | 0.032119244 |
| P04441 | Cd74    | H-2 class II histocompatibility antigen gamma chain           | 251.246  | 21.51 | 31557  | 6  | 2 | 1.062924886 | 0.27894049 | 2.63607E-11 | 7.15305E-14 |
| P05555 | Itgam   | Integrin alpha-M CD11b                                        | 968.769  | 29.31 | 127481 | 23 | 2 | 0.937863358 | 0.2682679  | 2.8551E-14  | 1.12632E-17 |
| P08228 | Sod1    | Superoxide dismutase [Cu-Zn]                                  | 173.22   | 34.42 | 15943  | 4  | 2 | 0.88267918  | 0.23342411 | 1.52926E-23 | 1.22014E-30 |
| P08508 | Fcgr3   | Low affinity immunoglobulin gamma Fc region receptor III      | 55.362   | 8.05  | 30036  | 2  | 2 | 0.88097937  | 0.32961405 | 1           | 0.71700353  |
| P09055 | Itgb1   | Integrin beta-1                                               | 467.858  | 21.55 | 88231  | 13 | 2 | 0.896515266 | 0.28507094 | 5.07607E-10 | 2.82839E-12 |
| P09103 | P4hb    | Protein disulfide-isomerase                                   | 1539.052 | 66.6  | 57058  | 38 | 2 | 1.052306347 | 0.29414201 | 6.44452E-08 | 1.00983E-09 |
| P09411 | Pgk1    | Phosphoglycerate kinase 1                                     | 2028.486 | 82.97 | 44550  | 48 | 2 | 0.944655104 | 0.23128573 | 1.02265E-24 | 2.05754E-32 |
| P13471 | Rps14   | 40S ribosomal protein S14                                     | 311.078  | 66.89 | 16259  | 9  | 2 | 0.936865748 | 0.27894049 | 1.94072E-11 | 4.8724E-14  |
| P14733 | Lmnbl   | Lamin-B1                                                      | 1089.586 | 57.99 | 66786  | 32 | 2 | 0.955287605 | 0.23342411 | 6.25294E-24 | 3.20019E-31 |
| P17047 | Lamp2   | Lysosome-associated membrane glycoprotein 2                   | 207.745  | 17.11 | 45681  | 7  | 2 | 1.09499716  | 0.29732277 | 2.27238E-06 | 6.89483E-08 |
| P17182 | Eno1    | Alpha-enolase                                                 | 1915.87  | 79.26 | 47141  | 40 | 2 | 0.943830323 | 0.27894049 | 8.80416E-11 | 3.22616E-13 |
| P17225 | Ptbp1   | Polypyrimidine tract-binding protein 1                        | 1128.374 | 66.98 | 56478  | 21 | 2 | 0.906433418 | 0.29936128 | 3.53681E-06 | 1.16053E-07 |
| P19253 | Rpl13a  | 60S ribosomal protein L13a                                    | 144.874  | 27.59 | 23464  | 6  | 2 | 1.107453316 | 0.29686941 | 1.44881E-06 | 4.05691E-08 |
| P21300 | Akr1b7  | Aldose reductase-related protein 1                            | 111.066  | 15.82 | 35988  | 6  | 2 | 1.076573729 | 0.22829718 | 9.73076E-27 | 1.57137E-35 |
| P23198 | Cbx3    | Chromobox protein homolog 3                                   | 366.566  | 42.62 | 20855  | 7  | 2 | 0.888633541 | 0.26244782 | 3.97411E-16 | 4.0056E-20  |
| P24369 | Ppib    | Peptidyl-prolyl cis-trans isomerase B                         | 393.827  | 43.06 | 23713  | 11 | 2 | 1.065995295 | 0.2682679  | 2.1865E-13  | 1.57844E-16 |
| P28740 | Kif2a   | Kinesin-like protein KIF2A                                    | 100.667  | 5.53  | 79756  | 4  | 2 | 0.863815653 | 0.37616256 | 1           | 0.99999152  |
| P29418 | Atp5f1e | ATP synthase subunit epsilon, mitochondrial                   | 2.148    | 29.41 | 5767   | 2  | 2 | 0.635655679 | 0.22829718 | 1.56271E-26 | 3.29266E-35 |
| P35564 | Canx    | Calnexin                                                      | 771.865  | 29.1  | 67278  | 17 | 2 | 1.07457164  | 0.24413627 | 9.89738E-21 | 1.58905E-26 |
| P40124 | Cap1    | Adenylyl cyclase-associated protein 1                         | 1729.781 | 73.42 | 51565  | 40 | 2 | 0.944986989 | 0.20737785 | 1.43033E-36 | 6.13662E-52 |
| P41565 | Idh3g   | Isocitrate dehydrogenase [NAD] subunit gamma 1, mitochondrial | 188.881  | 21.63 | 42851  | 6  | 2 | 0.884012134 | 0.23128573 | 6.47358E-25 | 1.02712E-32 |
| P49242 | Rps3a   | 40S ribosomal protein S3a                                     | 727.985  | 57.58 | 29945  | 20 | 2 | 0.887662227 | 0.34568264 | 1           | 0.98683272  |
| P49717 | Mcm4    | DNA replication licensing factor MCM4                         | 823.128  | 32.48 | 96736  | 22 | 2 | 0.918095248 | 0.30513796 | 9.23533E-05 | 5.14943E-06 |
| P56135 | Atp5mf  | ATP synthase subunit f, mitochondrial                         | 50.03    | 34.09 | 10344  | 4  | 2 | 1.109296296 | 0.25546543 | 6.2339E-18  | 1.40963E-22 |
| P57716 | Ncstn   | Nicastrin                                                     | 174.822  | 12.01 | 78492  | 6  | 2 | 1.112639054 | 0.27166054 | 4.07994E-12 | 6.75132E-15 |
| P60892 | Prps1   | Ribose-phosphate pyrophosphokinase 1                          | 338.338  | 27.04 | 34834  | 8  | 2 | 1.123564546 | 0.25788439 | 6.18274E-17 | 3.24303E-21 |
| P61028 | Rab8b   | Ras-related protein Rab-8B                                    | 303.135  | 44.44 | 23603  | 9  | 2 | 1.114711399 | 0.25681693 | 1.34939E-17 | 4.07355E-22 |
| P61354 | Rpl27   | 60S ribosomal protein L27                                     | 150.104  | 36.03 | 15798  | 5  | 2 | 1.105769465 | 0.26627283 | 1.00584E-14 | 2.87338E-18 |
| P61589 | Rhoa    | Transforming protein RhoA                                     | 508.556  | 64.77 | 21782  | 11 | 2 | 0.827756774 | 0.21730432 | 1.0918E-31  | 1.70673E-43 |
| P62270 | Rps18   | 40S ribosomal protein S18                                     | 304.374  | 54.61 | 17719  | 13 | 2 | 1.072471959 | 0.24413627 | 3.43622E-20 | 9.40887E-26 |

|        |          |                                                                                                              |          |       |        |    |   |             |            |             |             |
|--------|----------|--------------------------------------------------------------------------------------------------------------|----------|-------|--------|----|---|-------------|------------|-------------|-------------|
| P63158 | Hmgb1    | High mobility group protein B1                                                                               | 259.891  | 35.81 | 24894  | 9  | 2 | 0.8578287   | 0.29686941 | 1.15352E-06 | 3.10133E-08 |
| P68037 | Ube2l3   | Ubiquitin-conjugating enzyme E2 L3                                                                           | 192.778  | 51.95 | 17862  | 4  | 2 | 0.890058672 | 0.31014969 | 0.19611539  | 0.039315603 |
| P70333 | Hnrnp2   | Heterogeneous nuclear ribonucleoprotein H2                                                                   | 330.103  | 25.17 | 49280  | 8  | 2 | 0.900568955 | 0.28124977 | 2.13218E-10 | 9.69885E-13 |
| P84082 | Arf2     | ADP-ribosylation factor 2                                                                                    | 569.006  | 58.56 | 20746  | 13 | 2 | 1.090046349 | 0.24453979 | 2.63589E-19 | 1.69759E-24 |
| P84096 | Rhog     | Rho-related GTP-binding protein RhoG                                                                         | 411.779  | 51.83 | 21309  | 9  | 2 | 0.845645683 | 0.24067098 | 1.38516E-22 | 3.24205E-29 |
| Q04692 | Smarcd1  | SWI/SNF-related matrix-associated actin-dependent regulator of chromatin subfamily A containing DEAD/H box 1 | 102      | 4.51  | 116451 | 3  | 2 | 0.803274931 | 0.29433913 | 2.21707E-07 | 4.39489E-09 |
| Q2TBE6 | Pi4k2a   | Phosphatidylinositol 4-kinase type 2-alpha                                                                   | 55.402   | 3.34  | 54258  | 2  | 2 | 1.191827363 | 0.27166054 | 2.96978E-12 | 4.50636E-15 |
| Q3T1J9 | Mob1a    | MOB kinase activator 1A                                                                                      | 118.443  | 33.8  | 25080  | 6  | 2 | 1.062070226 | 0.30513796 | 0.003170452 | 0.000303084 |
| Q3TBD2 | Arhgap45 | Rho GTPase-activating protein 45                                                                             | 339.323  | 15.77 | 122902 | 11 | 2 | 0.907713491 | 0.29433913 | 7.27028E-07 | 1.79505E-08 |
| Q3TCN2 | Plbd2    | Putative phospholipase B-like 2                                                                              | 263.875  | 17    | 66289  | 8  | 2 | 0.788186964 | 0.32376711 | 1           | 0.55289498  |
| Q3THK7 | Gmps     | GMP synthase [glutamine-hydrolyzing]                                                                         | 511.269  | 31.17 | 76723  | 17 | 2 | 0.925830686 | 0.27166054 | 1.5646E-12  | 1.98744E-15 |
| Q3TRM8 | Hk3      | Hexokinase-3                                                                                                 | 1391.424 | 50.65 | 100101 | 33 | 2 | 1.23300809  | 0.32376711 | 0.93335884  | 0.28132664  |
| Q4FZY0 | Efh2     | EF-hand domain-containing protein D2                                                                         | 624.41   | 58.16 | 26759  | 16 | 2 | 1.05405137  | 0.30166128 | 1.27343E-05 | 5.1889E-07  |
| Q4V7C7 | Actr3    | Actin-related protein 3                                                                                      | 974.506  | 76.56 | 47357  | 29 | 2 | 0.919608436 | 0.24413627 | 2.8037E-21  | 2.59348E-27 |
| Q4V8H8 | Ehd2     | EH domain-containing protein 2                                                                               | 30.884   | 3.5   | 61237  | 2  | 2 | 1.104120752 | 0.20737785 | 8.75188E-38 | 3.80668E-54 |
| Q5X173 | Arhgdia  | Rho GDP-dissociation inhibitor 1                                                                             | 574.961  | 77.94 | 23407  | 15 | 2 | 0.917503881 | 0.29414201 | 1.36032E-07 | 2.4568E-09  |
| Q61183 | Papola   | Poly(A) polymerase alpha                                                                                     | 33.647   | 3.38  | 82309  | 2  | 2 | 0.703755546 | 0.29414201 | 1.06249E-07 | 1.83097E-09 |
| Q61316 | Hspa4    | Heat shock 70 kDa protein 4                                                                                  | 1248.721 | 50.3  | 94133  | 30 | 2 | 0.945588414 | 0.30547343 | 0.058290321 | 0.009157355 |
| Q61699 | Hsph1    | Heat shock protein 105 kDa                                                                                   | 136.096  | 5.48  | 96407  | 3  | 2 | 0.729615566 | 0.2682679  | 5.67024E-14 | 2.74864E-17 |
| Q61820 | Rasl2-9  | GTP-binding nuclear protein Ran, testis-specific isoform                                                     | 154.659  | 25    | 24452  | 6  | 2 | 0.934013098 | 0.31168245 | 0.35665743  | 0.081811092 |
| Q62159 | Rhoc     | Rho-related GTP-binding protein RhoC                                                                         | 544.859  | 65.8  | 22006  | 11 | 2 | 0.827359531 | 0.21730432 | 6.50834E-32 | 7.30752E-44 |
| Q640N3 | Arhgap30 | Rho GTPase-activating protein 30                                                                             | 48.964   | 5.18  | 120114 | 3  | 2 | 0.832564347 | 0.21730432 | 8.49135E-31 | 4.88691E-42 |
| Q69ZN7 | Myof     | Myoferlin                                                                                                    | 429.761  | 10.11 | 233324 | 17 | 2 | 1.113769486 | 0.24413627 | 1.1982E-21  | 7.60908E-28 |
| Q6A028 | Swap70   | Switch-associated protein 70                                                                                 | 515.661  | 32.82 | 68996  | 15 | 2 | 0.898624906 | 0.38229794 | 1           | 0.99999413  |
| Q6ZPF4 | Fmn13    | Formin-like protein 3                                                                                        | 410.717  | 14.4  | 117169 | 10 | 2 | 0.851591711 | 0.30547343 | 0.030006931 | 0.004178273 |
| Q80SW1 | Ahcyl1   | S-adenosylhomocysteine hydrolase-like protein 1                                                              | 265.391  | 25.28 | 58951  | 10 | 2 | 0.918508708 | 0.24067098 | 8.94737E-23 | 1.70315E-29 |
| Q80UM7 | Mogs     | Mannosyl-oligosaccharide glucosidase                                                                         | 495.036  | 21.82 | 91831  | 11 | 2 | 1.105813534 | 0.30547343 | 0.033674166 | 0.004787065 |
| Q80UU9 | Pgrmc2   | Membrane-associated progesterone receptor component 2                                                        | 189.428  | 20.28 | 23334  | 2  | 2 | 0.541445519 | 0.23342411 | 3.71266E-23 | 4.58538E-30 |
| Q80VD1 | Fam98b   | Protein FAM98B                                                                                               | 80.732   | 6.76  | 45349  | 2  | 2 | 0.888992761 | 0.31168245 | 0.33295811  | 0.075118817 |
| Q8BH86 | Dglucy   | D-glutamate cyclase, mitochondrial                                                                           | 162.102  | 14.42 | 66366  | 5  | 2 | 0.818974968 | 0.2682679  | 7.9683E-14  | 4.27291E-17 |
| Q8BH95 | Echs1    | Enoyl-CoA hydratase, mitochondrial                                                                           | 206.452  | 23.1  | 31474  | 5  | 2 | 0.87439013  | 0.27166054 | 2.15762E-12 | 2.99749E-15 |
| Q8BK64 | Ahsa1    | Activator of 90 kDa heat shock protein ATPase homolog 1                                                      | 296.164  | 32.84 | 38117  | 7  | 2 | 1.14062151  | 0.32961405 | 1           | 0.68655037  |
| Q8BMK4 | Ckap4    | Cytoskeleton-associated protein 4                                                                            | 910.017  | 51.48 | 63692  | 24 | 2 | 1.092209153 | 0.22752045 | 6.04816E-27 | 7.45331E-36 |
| Q8BUR4 | Dock1    | Dedicator of cytokinesis protein 1                                                                           | 77.53    | 1.88  | 215085 | 3  | 2 | 0.852304158 | 0.21730432 | 5.45912E-28 | 1.61421E-37 |
| Q8BVI4 | Qdpr     | Dihydropteridine reductase                                                                                   | 216.144  | 31.12 | 25570  | 5  | 2 | 0.863244122 | 0.27166054 | 5.59449E-12 | 1.0091E-14  |
| Q8C156 | Ncaph    | Condensin complex subunit 2                                                                                  | 76.659   | 5.06  | 82303  | 2  | 2 | 0.694736573 | 0.46500925 | 1           | 1           |
| Q8C878 | Uba3     | NEDD8-activating enzyme E1 catalytic subunit                                                                 | 227.269  | 24.89 | 51737  | 6  | 2 | 0.816779358 | 0.30513796 | 0.011152637 | 0.001307915 |
| Q8C9B9 | Dido1    | Death-inducer obliterator 1                                                                                  | 38.162   | 1.37  | 247176 | 2  | 2 | 0.861617872 | 0.24825716 | 1.93032E-18 | 2.77861E-23 |
| Q8CFI7 | Polr2b   | DNA-directed RNA polymerase II subunit RPB2                                                                  | 67.151   | 5.79  | 133911 | 5  | 2 | 0.786317889 | 0.32376711 | 1           | 0.51757375  |
| Q8K2V6 | Ipo11    | Importin-11                                                                                                  | 82.276   | 3.9   | 112416 | 2  | 2 | 0.76039248  | 0.28507094 | 3.59373E-09 | 3.07451E-11 |
| Q8K411 | Pitrm1   | Presequence protease, mitochondrial                                                                          | 259.001  | 16.89 | 117372 | 11 | 2 | 0.889329306 | 0.30547343 | 0.064692459 | 0.010363383 |
| Q8R0G9 | Nup133   | Nuclear pore complex protein Nup133                                                                          | 140.219  | 7.53  | 128620 | 5  | 2 | 0.844584906 | 0.29686941 | 1.8162E-06  | 5.29426E-08 |
| Q8VE99 | Ccdc115  | Coiled-coil domain-containing protein 115                                                                    | 70.489   | 22.78 | 19743  | 2  | 2 | 0.79138375  | 0.23128573 | 4.09042E-25 | 5.11191E-33 |

|        |          |                                                     |          |       |       |    |   |             |            |             |             |
|--------|----------|-----------------------------------------------------|----------|-------|-------|----|---|-------------|------------|-------------|-------------|
| Q8WTY4 | Ciapin1  | Anamorsin                                           | 142.093  | 29.77 | 33429 | 5  | 2 | 0.701233726 | 0.31926343 | 0.71619676  | 0.19815419  |
| Q91XU1 | Qki      | Protein quaking                                     | 203.341  | 23.75 | 37643 | 5  | 2 | 0.834706533 | 0.21730432 | 1.74426E-29 | 6.47029E-40 |
| Q99K51 | Pls3     | Plastin-3                                           | 1198.189 | 64.6  | 70742 | 32 | 2 | 1.063142115 | 0.29247805 | 3.8791E-08  | 5.50721E-10 |
| Q99KP6 | Prpf19   | Pre-mRNA-processing factor 19                       | 539.892  | 46.23 | 55239 | 14 | 2 | 0.899185235 | 0.23128573 | 2.53804E-24 | 8.16907E-32 |
| Q99MD9 | Nasp     | Nuclear autoantigenic sperm protein                 | 209.463  | 13.45 | 83954 | 7  | 2 | 0.82981051  | 0.24413627 | 4.27691E-21 | 4.7626E-27  |
| Q99P91 | Gpnmb    | Transmembrane glycoprotein NMB                      | 122.195  | 7.67  | 63676 | 5  | 2 | 1.221748592 | 0.28507094 | 6.75214E-10 | 4.01019E-12 |
| Q9CPU4 | Mgst3    | Microsomal glutathione S-transferase 3              | 204.663  | 49.67 | 16958 | 4  | 2 | 0.889985192 | 0.34389346 | 1           | 0.96989572  |
| Q9CR62 | Slc25a11 | Mitochondrial 2-oxoglutarate/malate carrier protein | 437.786  | 57.01 | 34155 | 15 | 2 | 1.120601088 | 0.2700068  | 3.04959E-13 | 2.42886E-16 |
| Q9CX86 | Hnmpa0   | Heterogeneous nuclear ribonucleoprotein A0          | 472.942  | 32.79 | 30530 | 10 | 2 | 0.93185776  | 0.33140787 | 1           | 0.83374379  |
| Q9CXF4 | Tbc1d15  | TBC1 domain family member 15                        | 177.005  | 8.64  | 76527 | 5  | 2 | 0.880527655 | 0.34389346 | 1           | 0.97983101  |
| Q9CZX9 | Emc4     | ER membrane protein complex subunit 4               | 49.036   | 15.85 | 20117 | 2  | 2 | 2.33834168  | 0.20548165 | 9.12645E-40 | 7.61364E-58 |
| Q9JI75 | Nqo2     | Ribosylidihydronicotinamide dehydrogenase [quinone] | 90.129   | 22.08 | 26248 | 3  | 2 | 3.393253366 | 0.28507094 | 4.71697E-09 | 4.27917E-11 |
| Q9JK81 | Myg1     | UPF0160 protein MYG1, mitochondrial                 | 343.682  | 30.53 | 42723 | 8  | 2 | 0.946486505 | 0.36932998 | 1           | 0.99990523  |
| Q9JM14 | Nt5c     | 5'(3')-deoxyribonucleotidase, cytosolic type        | 114.573  | 27.5  | 23076 | 3  | 2 | 0.838988226 | 0.28507094 | 2.07407E-09 | 1.5761E-11  |
| Q9WU28 | Pfdn5    | Prefoldin subunit 5                                 | 128.072  | 21.43 | 17356 | 2  | 2 | 0.803748195 | 0.3139939  | 0.46177628  | 0.11303125  |
| Q9WU78 | Pdcd6ip  | Programmed cell death 6-interacting protein         | 1224.259 | 53.39 | 96024 | 35 | 2 | 0.948587472 | 0.27933403 | 1.18457E-10 | 4.67111E-13 |
