# Supplementary material for: Repeated Exposure of Macrophages to Synthetic Amorphous Silica Induces Adaptive Proteome Changes and a Moderate Cell Activation
Source: MDPI journal article supplement (doi:10.3390/nano12091424), 2022-04-22
Supplement: s1 [file s1]

Table S6: proteins linked to mitochondria

| accession number | gene_name | description                                                          | ratio Pr/ctrl | ratio Fu/ctrl | T test Pr vs ctrl | T test Py vs ctrl |
|------------------|-----------|----------------------------------------------------------------------|---------------|---------------|-------------------|-------------------|
| O35129           | Phb2      | Prohibitin-2                                                         | 1.129835927   | 1.034913261   | 0.002533893       | 0.193535478       |
| O35658           | C1qbp     | Complement component 1 Q subcomponent-binding protein, mitochondrial | 1.246582495   | 1.009048216   | 0.005126001       | 0.886624753       |
| P00405           | Mtco2     | Cytochrome c oxidase subunit 2                                       | 0.735392594   | 0.998870793   | 0.015434415       | 0.986849666       |
| P09671           | Sod2      | Superoxide dismutase [Mn], mitochondrial                             | 1.332345703   | 0.993033623   | 0.00222107        | 0.87326313        |
| P11928           | Oas1a     | 2'-5'-oligoadenylate synthase 1A                                     | 1.285445563   | 1.096041935   | 0.027726763       | 0.193590535       |
| P16332           | Mut       | Methylmalonyl-CoA mutase, mitochondrial                              | 1.17406184    | 1.017172881   | 0.005280587       | 0.665421768       |
| P19783           | Cox4i1    | Cytochrome c oxidase subunit 4 isoform 1, mitochondrial              | 1.107095629   | 1.065006288   | 0.002540912       | 0.015186435       |
| P20108           | Prdx3     | Thioredoxin-dependent peroxide reductase, mitochondrial Prx3         | 1.157475522   | 1.069655803   | 0.002485883       | 0.069271673       |
| P28352           | Apex1     | DNA-(apurinic or apyrimidinic site) lyase                            | 0.819428042   | 0.879554978   | 0.030341022       | 0.054971364       |
| P29758           | Oat       | Ornithine aminotransferase, mitochondrial                            | 1.267633192   | 1.042378612   | 3.99937E-05       | 0.042302865       |
| P32020           | Scp2      | Non-specific lipid-transfer protein                                  | 0.719113476   | 0.788356734   | 0.007574101       | 0.004745788       |
| P36552           | Cpox      | Oxygen-dependent coproporphyrinogen-III oxidase, mitochondrial       | 0.676224731   | 0.968451308   | 0.006153699       | 0.742848346       |
| P38060           | Hmgcl     | Hydroxymethylglutaryl-CoA lyase, mitochondrial                       | 0.819813757   | 0.959369323   | 0.004561241       | 0.410133949       |
| P38647           | Hspa9     | Stress-70 protein, mitochondrial                                     | 1.263736865   | 1.073657338   | 0.004889481       | 0.302685727       |
| P41216           | Acsl1     | Long-chain-fatty-acid--CoA ligase 1                                  | 1.197712734   | 1.013246654   | 0.006746039       | 0.725914863       |
| P48962           | Slc25a4   | ADP/ATP translocase 1                                                | 1.176749339   | 1.034227196   | 0.000999067       | 0.317209232       |
| P51174           | Acadl     | Long-chain specific acyl-CoA dehydrogenase, mitochondrial            | 1.116231094   | 1.050999123   | 0.004417197       | 0.175955813       |
| P51881           | Slc25a5   | ADP/ATP translocase 2                                                | 1.218654174   | 1.026985015   | 0.000157509       | 0.425442585       |
| P56135           | Atp5mf    | ATP synthase subunit f, mitochondrial                                | 1.221393033   | 1.109296296   | 0.000560756       | 0.01847533        |
| P56480           | Atp5f1b   | ATP synthase subunit beta, mitochondrial                             | 1.104016508   | 1.05561257    | 0.02764585        | 0.076372893       |
| P59017           | Bcl2l13   | Bcl-2-like protein 13                                                | 0.339690983   | 0.884244902   | 0.019963606       | 0.616853809       |
| P62908           | Rps3      | 40S ribosomal protein S3                                             | 1.123328077   | 1.008923814   | 0.00255899        | 0.747024505       |
| P63038           | Hspd1     | 60 kDa heat shock protein, mitochondrial                             | 1.125244274   | 1.038345336   | 0.000320689       | 0.044564605       |
| P63087           | Ppp1cc    | Serine/threonine-protein phosphatase PP1-gamma catalytic subunit     | 0.840743359   | 0.914840159   | 0.005791729       | 0.057155038       |
| P67778           | Phb       | Prohibitin                                                           | 1.123958779   | 1.002925161   | 0.010113763       | 0.926671094       |

|        |         |                                                                                                          |             |             |             |             |
|--------|---------|----------------------------------------------------------------------------------------------------------|-------------|-------------|-------------|-------------|
| P99029 | Prdx5   | Peroxisredoxin-5, mitochondrial                                                                          | 0.758889457 | 0.857463329 | 0.003933749 | 0.060601088 |
| Q03265 | Atp5f1a | ATP synthase subunit alpha, mitochondrial                                                                | 1.101111398 | 1.032742313 | 0.003000464 | 0.060770771 |
| Q05921 | Rnasel  | 2-5A-dependent ribonuclease                                                                              | 0.683721407 | 0.750508144 | 0.011798925 | 0.066830648 |
| Q14C51 | Ptcd3   | Pentatricopeptide repeat domain-containing protein 3, mitochondrial                                      | 1.354000989 | 1.095789987 | 0.034473285 | 0.127217175 |
| Q3TL44 | Nlr1    | NLR family member X1                                                                                     | 0.841418495 | 0.953612312 | 0.085814762 | 0.289174857 |
| Q60597 | Ogdh    | 2-oxoglutarate dehydrogenase, mitochondrial                                                              | 1.140917251 | 1.060496406 | 0.000120067 | 0.038505047 |
| Q60931 | Vdac3   | Voltage-dependent anion-selective channel protein 3                                                      | 1.152675268 | 1.018637496 | 0.001376895 | 0.563536334 |
| Q62465 | Vat1    | Synaptic vesicle membrane protein VAT-1 homolog                                                          | 0.732685002 | 0.989629175 | 0.001912047 | 0.842823689 |
| Q6P3A8 | Bckdhd  | 2-oxoisovalerate dehydrogenase subunit beta, mitochondrial                                               | 0.563177632 | 0.815164552 | 0.006279063 | 0.148122198 |
| Q6PB66 | Lrpprc  | Leucine-rich PPR motif-containing protein, mitochondrial                                                 | 1.184423355 | 1.076639133 | 0.00353685  | 0.118913828 |
| Q78IK2 | Atp5md  | Up-regulated during skeletal muscle growth protein 5                                                     | 1.144676857 | 0.94535141  | 0.003949396 | 0.226226199 |
| Q78IK4 | Apool   | MICOS complex subunit Mic27                                                                              | 0.918855935 | 0.938495996 | 0.021896988 | 0.063203722 |
| Q811U4 | Mfn1    | Mitofusin-1                                                                                              | 1.758044799 | 1.095676459 | 0.004433715 | 0.692082075 |
| Q8BGH2 | Samm50  | Sorting and assembly machinery component 50 homolog                                                      | 1.172946106 | 1.029190215 | 0.003570799 | 0.663343489 |
| Q8BH86 | Dglucy  | D-glutamate cyclase, mitochondrial                                                                       | 0.635894178 | 0.818974968 | 0.001061496 | 0.02270373  |
| Q8BH95 | Echs1   | Enoyl-CoA hydratase, mitochondrial                                                                       | 0.81513449  | 0.87439013  | 0.004987222 | 0.023936642 |
| Q8BMF4 | Dlat    | Dihydrolipoyllysine-residue acetyltransferase component of pyruvate dehydrogenase complex, mitochondrial | 1.119977864 | 1.060972461 | 0.01512153  | 0.054667904 |
| Q8BMS1 | Hadha   | Trifunctional enzyme subunit alpha, mitochondrial                                                        | 0.884115547 | 0.956841894 | 0.002220491 | 0.1297981   |
| Q8BP40 | Acp6    | Lysophosphatidic acid phosphatase type 6                                                                 | 0.744733387 | 0.88203816  | 0.007667602 | 0.326682704 |
| Q8CGK3 | Lonp1   | Lon protease homolog, mitochondrial                                                                      | 1.153231196 | 1.102458889 | 0.007621942 | 0.028061524 |
| Q8JZR0 | Acs15   | Long-chain-fatty-acid--CoA ligase 5                                                                      | 1.110855155 | 1.00971884  | 0.009702883 | 0.773577546 |
| Q8QZT1 | Acat1   | Acetyl-CoA acetyltransferase, mitochondrial                                                              | 0.85669917  | 0.909236673 | 0.002081238 | 0.020956994 |
| Q8R111 | Uqcrl0  | Cytochrome b-c1 complex subunit 9                                                                        | 1.222113776 | 1.048813555 | 0.004470015 | 0.358517296 |

|        |          |                                                                                     |             |             |             |             |
|--------|----------|-------------------------------------------------------------------------------------|-------------|-------------|-------------|-------------|
| Q8VDK1 | Nit1     | Deaminated glutathione amidase                                                      | 0.600417003 | 0.814885405 | 0.005428763 | 0.119433048 |
| Q8WTY4 | Ciapi1   | Anamorsin                                                                           | 0.419992511 | 0.701233726 | 1.28693E-05 | 0.04810254  |
| Q99LX0 | Park7    | Protein/nucleic acid deglycase DJ-1                                                 | 0.683484548 | 0.897481046 | 0.00475433  | 0.160566324 |
| Q9CPQ1 | Cox6c    | Cytochrome c oxidase subunit 6C                                                     | 1.213058624 | 1.049462551 | 0.000347832 | 0.153293215 |
| Q9CPQ3 | Tomm22   | Mitochondrial import receptor subunit TOM22 homolog                                 | 0.849591285 | 1.072415204 | 0.036739609 | 0.261491408 |
| Q9CPV4 | Glod4    | Glyoxalase domain-containing protein 4                                              | 0.810717354 | 0.972547966 | 0.000578651 | 0.30961383  |
| Q9CQN1 | Trap1    | Heat shock protein 75 kDa, mitochondrial                                            | 1.440789908 | 1.278062455 | 0.000830321 | 0.066341924 |
| Q9CQN6 | Tmem14c  | Transmembrane protein 14C                                                           | 1.270038298 | 1.036161387 | 0.008086005 | 0.649579907 |
| Q9CR62 | Slc25a11 | Mitochondrial 2-oxoglutarate/malate carrier protein                                 | 1.135506908 | 1.120601088 | 0.012552281 | 0.023143678 |
| Q9CXT8 | Pmpcb    | Mitochondrial-processing peptidase subunit beta                                     | 1.206171867 | 0.864809902 | 0.001528758 | 0.557885593 |
| Q9CYG7 | Tomm34   | Mitochondrial import receptor subunit TOM34                                         | 0.830737984 | 0.889982954 | 0.021865182 | 0.136182571 |
| Q9CZD3 | Gars     | Glycine--tRNA ligase                                                                | 1.161207289 | 1.060155091 | 0.017496975 | 0.083260838 |
| Q9CZU6 | Cs       | Citrate synthase, mitochondrial                                                     | 1.165369721 | 1.057230626 | 0.000758099 | 0.005533219 |
| Q9D172 | Gatd3a   | Glutamine amidotransferase-like class 1 domain-containing protein 3A, mitochondrial | 0.813822625 | 0.865534683 | 0.004131675 | 0.063834172 |
| Q9D6K5 | Synj2bp  | Synaptojanin-2-binding protein                                                      | 1.270926418 | 1.07243633  | 0.012714228 | 0.247341673 |
| Q9D6U8 | Fam162a  | Protein FAM162A                                                                     | 1.347411615 | 1.135720045 | 0.002408274 | 0.072679044 |
| Q9D880 | Timm50   | Mitochondrial import inner membrane translocase subunit TIM50                       | 0.938113622 | 0.970462852 | 0.028275219 | 0.174855024 |
| Q9D964 | Gatm     | Glycine amidinotransferase, mitochondrial                                           | 0.813274821 | 0.869573    | 0.000980394 | 0.03719697  |
| Q9DCN2 | Cyb5r3   | NADH-cytochrome b5 reductase 3                                                      | 1.21038842  | 1.077371373 | 0.003638862 | 0.038532839 |
| Q9EPB4 | Pycard   | Apoptosis-associated speck-like protein containing a CARD                           | 0.883879676 | 0.841254737 | 0.001444539 | 0.021412344 |
| Q9JIK9 | Mrps34   | 28S ribosomal protein S34, mitochondrial                                            | 1.137472101 | 0.988529205 | 0.015233536 | 0.787494993 |
| Q9JK81 | Myg1     | UPF0160 protein MYG1, mitochondrial                                                 | 0.80861539  | 0.946486505 | 0.000172796 | 0.072743279 |
| Q9JM90 | Stap1    | Signal-transducing adaptor protein 1                                                | 1.375519337 | 1.069388073 | 0.012401315 | 0.340023646 |
| Q9QYR9 | Acot2    | Acyl-coenzyme A thioesterase 2, mitochondrial                                       | 0.829231863 | 0.913943398 | 0.024604635 | 0.169339435 |

|        |          |                                                                      |             |             |             |             |
|--------|----------|----------------------------------------------------------------------|-------------|-------------|-------------|-------------|
| Q9R0X4 | Acot9    | Acyl-coenzyme A thioesterase 9, mitochondrial                        | 1.236014962 | 1.255790773 | 0.012366826 | 0.009974659 |
| Q9WTP6 | Ak2      | Adenylate kinase 2, mitochondrial                                    | 0.877418771 | 0.904475564 | 0.022543927 | 0.05362444  |
| Q9WUM5 | Suclg1   | Succinate--CoA ligase [ADP/GDP-forming] subunit alpha, mitochondrial | 0.888785741 | 0.861061759 | 0.001077851 | 0.002579821 |
| Q9Z110 | Aldh18a1 | Delta-1-pyrroline-5-carboxylate synthase                             | 1.265385246 | 1.048428033 | 0.000150112 | 0.340822589 |
