# Supplementary material for: Repeated Exposure of Macrophages to Synthetic Amorphous Silica Induces Adaptive Proteome Changes and a Moderate Cell Activation
Source: MDPI journal article supplement (doi:10.3390/nano12091424), 2022-04-22
Supplement: s1 [file s1]

Table S9: proteins linked to immunity

| accession number | gene_name | description                                                          | ratio Pr/ctrl | ratio Fu/ctrl | T test Pr/<br>vs ctrl | T test Fu<br>vs ctrl |
|------------------|-----------|----------------------------------------------------------------------|---------------|---------------|-----------------------|----------------------|
| O35658           | C1qbp     | Complement component 1 Q subcomponent-binding protein, mitochondrial | 1.2465825     | 1.0090482     | 0.005126              | 0.8866248            |
| P01896           |           | H-2 class I histocompatibility antigen, alpha chain                  | 1.2104044     | 1.0837322     | 0.0098115             | 0.1721726            |
| P01899           | H2-D1     | H-2 class I histocompatibility antigen, D-B alpha chain              | 1.309791      | 1.1268523     | 0.0008594             | 0.0214163            |
| P01900           | H2-D1     | H-2 class I histocompatibility antigen, D-D alpha chain              | 1.2731407     | 1.1031101     | 0.0009463             | 0.0437297            |
| P01901           | H2-K1     | H-2 class I histocompatibility antigen, K-B alpha chain              | 1.3182079     | 1.117418      | 0.0009352             | 0.0516113            |
| P01902           | H2-K1     | H-2 class I histocompatibility antigen, K-D alpha chain              | 1.4290736     | 1.1647948     | 2.138E-05             | 0.0083836            |
| P04441           | Cd74      | H-2 class II histocompatibility antigen gamma chain                  | 1.0932528     | 1.0629249     | 0.0120611             | 0.0254623            |
| P06339           | H2-T23    | H-2 class I histocompatibility antigen, D-37 alpha chain             | 1.4726637     | 1.1823455     | 5.269E-05             | 0.0252435            |
| P09581           | Csf1r     | Macrophage colony-stimulating factor 1 receptor                      | 0.7084985     | 0.9251445     | 0.0002168             | 0.0970605            |
| P10810           | Cd14      | Monocyte differentiation antigen CD14                                | 1.1153535     | 1.0394854     | 0.0165151             | 0.449006             |
| P11928           | Oas1a     | 2'-5'-oligoadenylate synthase 1A                                     | 1.2854456     | 1.0960419     | 0.0277268             | 0.1935905            |
| P16110           | Lgals3    | Galectin-3                                                           | 0.6757279     | 0.9169138     | 0.0018308             | 0.2550878            |
| P26151           | Fcgr1     | High affinity immunoglobulin gamma Fc receptor I                     | 0.8073186     | 0.9297252     | 0.0039684             | 0.2308725            |
| P30681           | Hmgb2     | High mobility group protein B2                                       | 0.7236594     | 0.8526239     | 2.813E-07             | 0.0015849            |
| P34884           | Mif       | Macrophage migration inhibitory factor                               | 0.7153846     | 0.7216359     | 0.0011537             | 0.0043229            |
| P42082           | Cd86      | T-lymphocyte activation antigen CD86                                 | 1.2275484     | 1.0905935     | 0.0012159             | 0.2079109            |
| P58242           | Smpdl3b   | Acid sphingomyelinase-like phosphodiesterase 3b                      | 0.7807617     | 0.8441364     | 0.0578773             | 0.1415048            |
| P63158           | Hmgb1     | High mobility group protein B1                                       | 0.7370306     | 0.8578287     | 0.0003459             | 0.0323128            |
| Q3TL44           | Nlrp1     | NLR family member X1 Deoxynucleoside triphosphate                    | 0.8414185     | 0.9536123     | 0.0858148             | 0.2891749            |
| Q60710           | Samhd1    | triphosphohydrolase SAMHD1                                           | 0.6900705     | 0.8403139     | 0.002299              | 0.0575615            |
| Q61990           | Pcbp2     | Poly(rC)-binding protein 2                                           | 0.8990317     | 0.897888      | 0.0042718             | 0.00904              |
| Q62418           | Dbnl      | Drebrin-like protein                                                 | 0.8199604     | 1.0097015     | 0.0357454             | 0.8921289            |
| Q6Q899           | Ddx58     | Probable ATP-dependent RNA helicase DDX58                            | 1.5029793     | 0.8023908     | 0.015233              | 0.3183146            |
| Q9CQW9           | Ifitm3    | Interferon-induced transmembrane protein 3                           | 1.4607914     | 1.2602396     | 0.0031971             | 0.0088772            |

|            |        |                                                           |           |           |           |           |
|------------|--------|-----------------------------------------------------------|-----------|-----------|-----------|-----------|
| Q9EPB4     | Pycard | Apoptosis-associated speck-like protein containing a CARD | 0.8838797 | 0.8412547 | 0.0014445 | 0.0214123 |
| Q9ES52     | Inpp5d | Phosphatidylinositol 3,4,5-trisphosphate 5-phosphatase 1  | 0.9392637 | 1.0315179 | 0.0132339 | 0.2094514 |
| Q9ESY9     | Ifi30  | Gamma-interferon-inducible lysosomal thiol reductase      | 0.4049389 | 0.677976  | 3.43E-07  | 4.007E-05 |
| Q9QUN7     | Tlr2   | Toll-like receptor 2                                      | 1.2979424 | 1.0041935 | 0.0066166 | 0.9564243 |
| Q9R0Q8     | Clec4e | C-type lectin domain family 4 member E                    | 5.5255633 | 1.6245915 | 0.001789  | 0.1522657 |
| Q9R1P4     | Psma1  | Proteasome subunit alpha type-1                           | 0.8812492 | 0.9986071 | 0.0019385 | 0.9594586 |
| P05555     | Itgam  | Integrin alpha-M CD11b                                    | 0.888415  | 0.9378634 | 0.0008045 | 0.0221523 |
| P11835     | Itgb2  | Integrin beta-2                                           | 0.8640331 | 0.8712786 | 0.0006385 | 0.0041396 |
| P30204     | Msr1   | Macrophage scavenger receptor types I and II CD204        | 1.3888459 | 1.1784492 | 0.0028806 | 0.0426059 |
| P42082     | Cd86   | T-lymphocyte activation antigen CD86                      | 1.2275484 | 1.0905935 | 0.0012159 | 0.2079109 |
| P34960     | Mmp12  | Macrophage metalloelastase                                | 1.7433544 | 1.5392242 | 0.0006312 | 0.0026677 |
| P26151     | Fcgr1  | High affinity immunoglobulin gamma Fc receptor I          | 0.8073186 | 0.9297252 | 0.0039684 | 0.2308725 |
| P08101     | Fcgr2  | Low affinity immunoglobulin gamma Fc region receptor II   | 0.7733526 | 0.8721087 | 0.0017031 | 0.0425047 |
| P08508     | Fcgr3  | Low affinity immunoglobulin gamma Fc region receptor III  | 0.721257  | 0.8809794 | 0.0005607 | 0.0544209 |
| A0A0B4J1G0 | Fcgr4  | Low affinity immunoglobulin gamma Fc region receptor IV   | 0.7064723 | 0.9184123 | 2.968E-05 | 0.0334368 |
