# Supplementary material for: Repeated Exposure of Macrophages to Synthetic Amorphous Silica Induces Adaptive Proteome Changes and a Moderate Cell Activation
Source: MDPI journal article supplement (doi:10.3390/nano12091424), 2022-04-22
Supplement: s1 [file s1]

Table S8: proteins linked to lysosomes

| accession number | gene_name | description                                                    | ratio Pr/ctrl | ratio Fu/ctrl | T test Pr vs ctrl | T test Py vs ctrl |
|------------------|-----------|----------------------------------------------------------------|---------------|---------------|-------------------|-------------------|
| O70439           | Stx7      | Syntaxin-7                                                     | 0.8152205     | 0.927133      | 0.0003277         | 0.0285204         |
| O08709           | Prdx6     | Peroxiredoxin-6                                                | 0.8286838     | 0.9322557     | 0.0016014         | 0.0868954         |
| O09159           | Man2b1    | Lysosomal alpha-mannosidase                                    | 0.5432037     | 0.8744404     | 4.3E-06           | 0.0060299         |
| O70370           | Ctss      | Cathepsin S                                                    | 0.7378722     | 0.9307412     | 1.821E-05         | 0.1781141         |
| O70404           | Vamp8     | Vesicle-associated membrane protein 8                          | 0.7382257     | 1.0473583     | 0.0842288         | 0.3784841         |
| O88384           | Vti1b     | Vesicle transport through interaction with t-SNAREs homolog 1B | 0.6138922     | 0.980002      | 0.0031462         | 0.7655956         |
| O88531           | Ppt1      | Palmitoyl-protein thioesterase 1                               | 0.7369213     | 0.9803523     | 0.024622          | 0.8372305         |
| O89017           | Lgmn      | Legumain                                                       | 0.5272381     | 0.81788       | 0.0013673         | 0.0728018         |
| O89023           | Tpp1      | Tripeptidyl-peptidase 1                                        | 0.6368712     | 0.9176056     | 0.0004264         | 0.1401913         |
| P10605           | Ctsb      | Cathepsin B                                                    | 0.7351592     | 0.9233382     | 0.0021039         | 0.1549488         |
| P12265           | Gusb      | Beta-glucuronidase                                             | 0.69189       | 0.9424831     | 0.0018083         | 0.3413921         |
| P16675           | Ctsa      | Lysosomal protective protein                                   | 0.7933639     | 1.0047681     | 0.0014561         | 0.9139159         |
| P17047           | Lamp2     | Lysosome-associated membrane glycoprotein 2                    | 1.0085785     | 1.0949972     | 0.8304094         | 0.0326377         |
| P17439           | Gba       | Glucosylceramidase                                             | 0.7359921     | 0.9187196     | 0.0307469         | 0.1293887         |
| P18242           | Ctsd      | Cathepsin D                                                    | 0.7153965     | 1.0005894     | 0.0067871         | 0.9927962         |
| P20060           | Hexb      | Beta-hexosaminidase subunit beta                               | 0.7627635     | 0.9610381     | 0.0067747         | 0.4284235         |
| P23780           | Glb1      | Beta-galactosidase                                             | 0.8165547     | 0.955713      | 0.0135993         | 0.5097627         |
| P24668           | M6pr      | Cation-dependent mannose-6-phosphate receptor                  | 1.0702246     | 0.9801959     | 0.0141635         | 0.5424002         |
| P29416           | Hexa      | Beta-hexosaminidase subunit alpha                              | 0.8214424     | 0.9676633     | 0.0043188         | 0.430075          |
| P48441           | Idua      | Alpha-L-iduronidase                                            | 0.7567304     | 0.9821068     | 0.0040303         | 0.8492658         |
| P50428           | Arsa      | Arylsulfatase A                                                | 0.478642      | 0.8143551     | 0.018173          | 0.1476579         |
| P50429           | Arsb      | Arylsulfatase B                                                | 0.5314164     | 0.8448751     | 4.783E-05         | 0.0225149         |
| P51569           | Gla       | Alpha-galactosidase A                                          | 0.6835181     | 0.9681942     | 0.000531          | 0.5062944         |
| P52875           | Tmem165   | Transmembrane protein 165                                      | 1.3079191     | 0.9691447     | 0.005236          | 0.6632996         |
| P70665           | Siae      | Sialate O-acetyltransferase                                    | 0.6749521     | 0.9238752     | 2.13E-05          | 0.0342826         |
| P97821           | Ctsc      | Dipeptidyl peptidase 1                                         | 0.6424995     | 0.7980016     | 4.772E-05         | 0.0022992         |
| Q3TCN2           | Plbd2     | Putative phospholipase B-like 2                                | 0.5727974     | 0.788187      | 0.0030461         | 0.0518813         |
| Q571E4           | Galns     | N-acetylgalactosamine-6-sulfatase                              | 0.5648582     | 0.8264042     | 0.0266381         | 0.2571584         |
| Q61207           | Psap      | Prosaposin                                                     | 0.4839972     | 0.7871221     | 0.0009209         | 0.0425497         |
| Q7TMR0           | Prcp      | Lysosomal Pro-X carboxypeptidase                               | 0.7396043     | 0.9148804     | 0.0087178         | 0.1867965         |
| Q8BFR4           | Gns       | N-acetylglucosamine-6-sulfatase                                | 0.6888079     | 1.0206849     | 0.0244023         | 0.8663465         |

|        |          |                                                      |           |           |           |           |
|--------|----------|------------------------------------------------------|-----------|-----------|-----------|-----------|
| Q8K2I4 | Manba    | Beta-mannosidase                                     | 0.5641421 | 0.8795761 | 0.0088641 | 0.3300241 |
| Q8VE99 | Ccdc115  | Coiled-coil domain-containing protein 115            | 0.7700426 | 0.7913837 | 0.0101929 | 0.0131147 |
| Q8VEB4 | Pla2g15  | Group XV phospholipase A2                            | 0.7071917 | 0.9517657 | 0.0042617 | 0.4659972 |
| Q8VEH3 | Arl8a    | ADP-ribosylation factor-like protein 8A              | 0.7723031 | 1.0092352 | 0.0039101 | 0.8541104 |
| Q9CQ22 | Lamtor1  | Ragulator complex protein LAMTOR1                    | 0.7949129 | 0.9596358 | 0.0122936 | 0.5195798 |
| Q9CQW9 | Ifitm3   | Interferon-induced transmembrane protein 3           | 1.4607914 | 1.2602396 | 0.0031971 | 0.0088772 |
| Q9ESY9 | Ifi30    | Gamma-interferon-inducible lysosomal thiol reductase | 0.4049389 | 0.677976  | 3.43E-07  | 4.007E-05 |
| Q9JHJ3 | GImp     | Glycosylated lysosomal membrane protein              | 0.708834  | 0.8130006 | 0.005138  | 0.0035245 |
| Q9JHS3 | Lamtor2  | Ragulator complex protein LAMTOR2                    | 0.6197474 | 0.5771106 | 0.0022696 | 0.0009776 |
| Q9QWR8 | Naga     | Alpha-N-acetylgalactosaminidase                      | 0.6342371 | 0.8896636 | 0.0054548 | 0.1938527 |
| Q9WUU7 | Ctsz     | Cathepsin Z                                          | 0.7994102 | 0.9767766 | 0.0004218 | 0.4512307 |
| Q9WV54 | Asah1    | Acid ceramidase                                      | 0.7288531 | 0.9099175 | 0.0053045 | 0.2137605 |
| Q9Z0J0 | Npc2     | NPC intracellular cholesterol transporter 2          | 0.676353  | 0.7833006 | 0.0046602 | 0.0247731 |
| Q9Z0M5 | Lipa     | Lysosomal acid lipase/cholesteryl ester hydrolase    | 1.6849821 | 1.2364377 | 0.0054501 | 0.0551958 |
| P28798 | Grn      | Granulins                                            | 0.684622  | 0.6193002 | 0.0201477 | 0.003634  |
| Q09014 | Ncf1     | Neutrophil cytosol factor 1                          | 0.9276363 | 0.973097  | 0.0060703 | 0.2079595 |
| O70145 | Ncf2     | Neutrophil cytosol factor 2                          | 0.8562981 | 0.9196041 | 0.0189294 | 0.0218527 |
| P97369 | Ncf4     | Neutrophil cytosol factor 4                          | 1.0789373 | 1.0575496 | 0.0873325 | 0.2493613 |
| Q8CIZ9 | Nox1     | NADPH oxidase 1                                      | 1.4172108 | 1.0061708 | 0.0032124 | 0.9565631 |
| P50408 | Atp6v1f  | V-type proton ATPase sub. F                          | 0.6764728 | 0.8520792 | 0.0558461 | 0.4287312 |
| P50518 | Atp6v1e1 | V-type proton ATPase sub. E 1                        | 0.6214155 | 0.7445003 | 0.0079272 | 0.0175893 |
| P51863 | Atp6v0d1 | V-type proton ATPase sub. d 1                        | 1.0575101 | 1.0365863 | 0.0298925 | 0.2672908 |
| P63081 | Atp6v0c  | V-type proton ATPase 16 kDa proteolipid subunit      | 0.3221168 | 0.8576433 | 0.0069397 | 0.5426731 |
| Q9CR51 | Atp6v1g1 | V-type proton ATPase sub. G 1                        | 0.6764339 | 0.7534751 | 0.0165677 | 0.040652  |
