# Supplementary material for: Repeated Exposure of Macrophages to Synthetic Amorphous Silica Induces Adaptive Proteome Changes and a Moderate Cell Activation
Source: MDPI journal article supplement (doi:10.3390/nano12091424), 2022-04-22
Supplement: s1 [file s1]

Table S1: list of identified and quantified proteins, with abundances normalized in part per billion

| accession number | gene_name | description                                                                | protein_set_score | coverage | MW     | #peptides | abundance_Ctrl1.mgf | abundance_Ctrl2.mgf | abundance_Ctrl3.mgf | abundance_Ctrl4.mgf | abundance_Ctrl5.mgf | Abundance_Precip1.mgf | Abundance_Precip2.mgf | Abundance_Precip3.mgf | Abundance_Precip4.mgf | Abundance_Precip5.mgf | Abundance_Fumed1.mgf | Abundance_Fumed2.mgf | Abundance_Fumed3.mgf | Abundance_Fumed4.mgf | Abundance_Fumed5.mgf |
|------------------|-----------|----------------------------------------------------------------------------|-------------------|----------|--------|-----------|---------------------|---------------------|---------------------|---------------------|---------------------|-----------------------|-----------------------|-----------------------|-----------------------|-----------------------|----------------------|----------------------|----------------------|----------------------|----------------------|
| A0A0B4J1G0       | Fcgr4     | Low affinity immunoglobulin gamma Fc region receptor IV                    | 72.487            | 18.07    | 28398  | 4         | 39199.1254          | 40783.24956         | 35556.49013         | 36118.01865         | 39123.69075         | 27629.59008           | 28880.24694           | 27611.01412           | 26285.32985           | 24375.01463           | 35482.56764          | 34927.08094          | 32841.60974          | 35668.44065          | 36295.5207           |
| A0JPJ7           | Ola1      | Obg-like ATPase 1                                                          | 219.668           | 22.73    | 44535  | 6         | 82274.18741         | 91846.7714          | 84096.9419          | 77577.22846         | 94372.99772         | 86495.08578           | 86345.93951           | 92501.26224           | 76991.43938           | 85365.98096           | 83510.68824          | 94351.35539          | 82115.6756           | 88591.99183          | 92528.93282          |
| A1A5S1           | Pripf6    | Pre-mRNA-processing factor 6                                               | 88.778            | 6.38     | 106764 | 5         | 19284.48583         | 22107.45939         | 28889.96191         | 32631.19027         | 29398.58121         | 25059.85319           | 24831.9695            | 29456.51304           | 26291.35342           | 30150.27304           | 25093.82159          | 25789.38977          | 17666.00727          | 27789.91731          | 19229.83464          |
| A1L134           | Aup1      | Ancient ubiquitous protein 1                                               | 115.993           | 13.17    | 46199  | 4         | 11288.9064          | 8626.344556         | 17931.7066          | 8539.454192         | 15158.96742         | 20405.69066           | 22803.89933           | 18614.40804           | 9700.546022           | 20000.48209           | 11639.88605          | 13270.35529          | 15527.14316          | 14721.39664          | 17689.45437          |
| A1L134           | Mpeg1     | Macrophage-expressed gene 1 protein                                        | 674.945           | 37.87    | 78390  | 18        | 270985.5302         | 290690.2226         | 299066.9048         | 306651.2484         | 284129.8829         | 512932.7903           | 504834.4794           | 553927.0619           | 543097.6479           | 395463.1491           | 280364.3471          | 314709.092           | 283823.0185          | 286390.758           | 323019.339           |
| A2A432           | Cul4b     | Cullin-4B                                                                  | 133.737           | 6.39     | 110699 | 5         | 25357.46478         | 27985.71566         | 25521.27573         | 26714.345           | 25515.08437         | 22013.61073           | 28483.06444           | 30003.46203           | 30853.48448           | 26782.55516           | 24382.70908          | 27362.54817          | 26405.27526          | 25725.17047          | 26451.34808          |
| A2A5R2           | Arfge2    | Brefeldin A-inhibited guanine nucleotide-exchange protein 2                | 185.217           | 4.41     | 202240 | 5         | 11966.06851         | 11589.80098         | 12760.37278         | 11626.13357         | 9736.615617         | 8661.744692           | 9599.587996           | 12566.264             | 13088.76094           | 8834.79459            | 5888.337078          | 10137.02645          | 11756.36018          | 11407.59272          | 12959.89439          |
| A2AA5Y           | Sh3pxd2b  | SH3 and PX domain-containing protein 2B                                    | 31.872            | 3.96     | 101517 | 3         | 29090.19323         | 30299.05295         | 28345.29327         | 28780.96837         | 27827.00585         | 28913.96872           | 32515.66241           | 30931.1368            | 31854.0312            | 30920.55281           | 29209.94605          | 27975.94429          | 31478.41193          | 29930.82787          | 28075.06625          |
| A2ADY9           | Ddi2      | Protein DD11 homolog 2                                                     | 137.299           | 18.8     | 44591  | 4         | 27053.59116         | 31684.44214         | 25878.21622         | 28804.77197         | 26497.00021         | 18223.66116           | 9766.676001           | 17323.70043           | 17181.35877           | 19769.30858           | 28385.84973          | 23429.13251          | 31361.3572           | 28044.08008          | 27119.55092          |
| A2AGT5           | Ckap5     | Cytoskeleton-associated protein 5                                          | 272.831           | 6.55     | 225635 | 12        | 55367.49803         | 56866.51885         | 55265.13076         | 55008.64188         | 54973.54139         | 56990.89208           | 56133.61946           | 61208.28856           | 63444.09718           | 61135.76176           | 48593.98515          | 59081.85269          | 53545.19334          | 57446.45932          | 56843.63289          |
| A2AN08           | Ubr4      | E3 ubiquitin-protein ligase UBR4                                           | 402.156           | 3.82     | 572290 | 13        | 49053.91728         | 51485.92435         | 41384.20797         | 46255.18572         | 43823.30684         | 38990.05335           | 45584.1359            | 45343.30333           | 41442.83611           | 41372.04433           | 40144.68803          | 39800.25162          | 46820.54038          | 43991.6389           | 43192.97326          |
| A2APV2           | Fmn12     | Formin-like protein 2                                                      | 199.494           | 4.88     | 123101 | 6         | 56055.62275         | 52978.95696         | 53287.51964         | 53507.80453         | 51585.7791          | 45010.26093           | 46782.28673           | 46437.69427           | 47934.28832           | 50259.34296           | 47918.35937          | 50426.32392          | 47982.38964          | 55278.6502           | 50880.98518          |
| A2RRU1           | Gys1      | Glycogen [starch] synthase, muscle                                         | 88.101            | 7.05     | 84072  | 4         | 23643.45434         | 20401.76787         | 27989.29427         | 29177.0179          | 23427.47143         | 30067.73633           | 35033.54715           | 31218.5437            | 37237.5909            | 22279.59438           | 28079.3857           | 27655.24839          | 27275.9754           | 27125.9026           | 30906.64841          |
| A2RSY6           | Trmt11    | TRMT1-like protein                                                         | 90.625            | 4.4      | 80861  | 2         | 4801.508825         | 3885.840982         | 4648.393544         | 4273.258544         | 4237.050857         | 3293.58488            | 4043.112321           | 3758.433466           | 3637.863005           | 823.0014014           | 3682.784955          | 3849.754951          | 2909.892912          | 3764.883504          | 3831.864847          |
| A2RUW1           | Tollip    | Toll-interacting protein                                                   | 85.043            | 15.69    | 30315  | 3         | 31414.45584         | 31833.20242         | 27983.08667         | 34385.0813          | 30164.63002         | 25686.10416           | 27763.51268           | 33819.37114           | 28870.81819           | 24468.88864           | 27129.09535          | 31398.41389          | 27675.58675          | 29755.71537          | 28221.78529          |
| A2VCX1           | Tipr1     | TIP41-like protein                                                         | 59.903            | 13.65    | 31225  | 2         | 1124.436964         | 3842.729994         | 1331.070623         | 7308.946582         | 6698.604554         | 7374.377256           | 893.2508298           | 8326.04246            | 1026.472359           | 6778.178977           | 3692.047914          | 8647.84603           | 7472.475779          | 1296.345814          | 6840.481923          |
| A4L9P7           | Pds5a     | Sister chromatid cohesion protein PDS homolog A                            | 309.96            | 9.38     | 150286 | 11        | 63429.17092         | 53941.52014         | 67850.58406         | 64025.41418         | 60121.84484         | 57292.46206           | 65361.1896            | 61492.69509           | 61924.02283           | 60071.48549           | 52052.05521          | 62159.51169          | 58086.22294          | 62370.19568          | 62781.86627          |
| A6H5Z3           | Exoc6b    | Exocyst complex component 6B                                               | 77.214            | 5.56     | 94130  | 3         | 9178.157293         | 9090.210846         | 4916.481731         | 7375.548834         | 6570.796273         | 4153.79809            | 9639.28834            | 9393.971203           | 9428.50367            | 10577.51547           | 9887.769856          | 8554.38407           | 9264.532701          | 9418.151975          | 10161.20655          |
| A6H8H2           | Denn4dc   | DENN domain-containing protein 4C                                          | 112.131           | 2.2      | 211458 | 3         | 5947.45996          | 5213.832828         | 4526.716528         | 5352.962258         | 5203.628412         | 4982.039589           | 5206.836719           | 5418.706607           | 5847.080292           | 5133.178784           | 5789.807166          | 4625.995993          | 4479.588196          | 5579.617439          | 5612.275251          |
| A9UMV8           | H2afj     | Histone H2A.J                                                              | 423.071           | 64.34    | 14045  | 9         | 15775724.09         | 14961418.38         | 15768989.1          | 15352083.55         | 16118673.57         | 18102989.21           | 16482237.44           | 16993907.28           | 16681569.96           | 18141460.33           | 15544061.94          | 14722481.37          | 16412267.93          | 13465380.97          | 17123953.9           |
| B0BN0G           | Emc2      | ER membrane protein complex subunit 2                                      | 111.856           | 8.42     | 34870  | 2         | 15405.82219         | 16554.65356         | 15765.09539         | 15132.25107         | 19080.96043         | 22127.64274           | 19409.87424           | 19105.87408           | 19552.5286            | 18067.9977            | 13346.04712          | 16069.46249          | 16022.57937          | 17965.01167          |                      |
| B0BNM1           | Naxe      | NAD(P)H-hydrate epimerase                                                  | 199.691           | 29.43    | 30891  | 4         | 57464.32921         | 60050.63995         | 61329.97125         | 68961.76989         | 41226.00451         | 18796.49291           | 42662.57028           | 32076.41431           | 48277.82203           | 26501.20784           | 57322.07465          | 53159.14517          | 28334.62145          | 29729.53786          | 37469.66413          |
| B0BNM9           | GLTP      | Glycolipid transfer protein                                                | 119.801           | 32.54    | 23704  | 4         | 56125.1394          | 53064.1022          | 51287.7742          | 45652.58918         | 41924.71757         | 30814.51315           | 31769.41016           | 28372.12028           | 38651.05717           | 38375.948             | 47258.41607          | 51551.59447          | 49278.84411          | 48449.8964           | 44707.40457          |
| B1A2I6           | Thoc2     | THO complex subunit 2                                                      | 150.676           | 4.52     | 182773 | 6         | 45995.92108         | 49662.41796         | 46917.63903         | 58110.10736         | 48615.83532         | 53942.88849           | 52682.14686           | 56939.32409           | 56707.29846           | 49934.95978           | 51718.04426          | 22891.35687          | 51233.62685          | 48837.24225          | 45039.45593          |
| B1H268           | Mombp     | Mini-chromosome maintenance complex-binding protein                        | 64.848            | 6.23     | 73007  | 4         | 16874.80506         | 18280.15861         | 13401.83692         | 20335.09039         | 21214.36623         | 26470.93346           | 22150.56935           | 22792.57235           | 21337.82334           | 17897.01812           | 21026.28543          | 16458.37805          | 22857.72804          | 20533.72514          | 21094.65006          |
| B2GUV7           | Eif5b     | Eukaryotic translation initiation factor 5B                                | 215.548           | 9.7      | 137686 | 7         | 66780.06579         | 72584.40624         | 49682.23385         | 74552.54345         | 66804.08919         | 61732.94225           | 59383.47235           | 68271.52979           | 63718.06745           | 57784.85562           | 58419.09149          | 44695.55573          | 58270.67102          | 62438.53665          | 65132.64999          |
| B2RQC6           | Cad       | CAD protein                                                                | 670.669           | 12.18    | 243238 | 18        | 86332.50187         | 94621.20998         | 84688.42072         | 86805.81657         | 74219.92439         | 86412.15803           | 102778.585            | 98854.07731           | 98990.22902           | 96122.70456           | 85393.90477          | 88954.75562          | 82749.71528          | 84527.65707          | 89995.17897          |
| B2RX12           | Abcc3     | Canalicular multispecific organic anion transporter 2                      | 272.445           | 7.88     | 169124 | 7         | 17139.02056         | 24232.75343         | 15987.27203         | 19579.28827         | 18757.33346         | 12812.40764           | 15139.55339           | 14769.45041           | 16005.35522           | 15500.08045           | 15520.64466          | 17846.26773          | 23566.25976          | 18766.28207          | 15621.22641          |
| B2RXC1           | Trappc11  | Trafficking protein particle complex subunit 11                            | 68.93             | 2.56     | 128396 | 2         | 6565.583218         | 6296.46119          | 5683.375741         | 6497.188125         | 6781.489422         | 4510.488886           | 5172.005933           | 6977.154892           | 6363.053419           | 5645.542238           | 4717.439535          | 5440.041302          | 6026.939742          | 7282.92288           | 6003.433455          |
| B2RXR6           | Ankrd44   | Serine/threonine-protein phosphatase 5 regulatory ankyrin repeat subunit B | 292.332           | 9.87     | 107385 | 6         | 22499.2513          | 18788.17334         | 21190.11696         | 23429.38636         | 22795.344           | 17618.52925           | 13892.52112           | 17903.30146           | 14582.7373            | 21870.73124           | 20132.62177          | 18482.42109          | 19052.23901          | 14232.39986          | 18800.27882          |
| B2RSX4           | Plexn2    | Plexin-B2                                                                  | 833.25            | 21.61    | 206230 | 28        | 259584.866          | 310327.3357         | 250420.4627         | 276834.9817         | 275066.3025         | 262659.9789           | 276495.7578           | 253657.1997           | 255526.6456           | 261798.0571           | 274144.7856          | 279203.1975          | 285625.0544          | 281458.9554          | 284835.4018          |
| B2RY04           | Dock5     | Dedicator of cytokinesis protein 5                                         | 25.042            | 1.28     | 214429 | 2         | 1056.327021         | 1100.59322          | 1086.020592         | 986.4857275         | 739.8470698         | 860.4103692           | 869.0210861           | 908.1529155           | 1004.702566           | 1028.147332           | 959.330505           | 1370.485242          | 922.557431           | 1095.731413          | 1033.997502          |
| B2RY56           | Rbm25     | RNA-binding protein 25                                                     | 152.921           | 15.04    | 99552  | 8         | 42490.63847         | 45823.95128         | 43314.07929         | 35741.19406         | 39447.12141         | 30784.12861           | 36274.28787           | 41789.69158           | 35050.71537           | 32543.36117           | 36284.22451          | 36248.40245          | 34810.9823           | 33111.34949          | 38753.48034          |
| B2RYG6           | Otub1     | Ubiquitin thioesterase OTUB1                                               | 342.545           | 46.13    | 31270  | 9         | 92335.01197         | 101363.7237         | 81621.12998         | 104826.3107         | 97190.75464         | 92471.53947           | 97846.75261           | 99285.10296           | 90983.00957           | 85079.78343           | 90344.26405          | 100043.3001          | 100954.9737          | 104630.5396          | 94670.45166          |
| B3GN16           | Sept11    | Septin-11                                                                  | 222.449           | 23.67    | 49695  | 7         | 72574.68817         | 74438.83157         | 79434.99016         | 75105.15289         | 64860.327           | 70636.7083            | 77672.51949           | 74382.76386           | 69332.69172           | 65841.51073           | 76217.14683          | 74747.71343          | 66576.25079          | 69878.47259          | 64872.67605          |
| B5DF51           | Mmg1      | Membrane magnesium transporter 1                                           | 153.631           | 42.75    | 14677  | 3         | 12313.45739         | 9662.080722         | 8835.279163         | 9873.321287         | 9127.239964         | 11747.24643           | 10052.75075           | 12455.93951           | 12031.68662           | 11952.00804           | 9817.320424          | 9555.24321           | 10289.4183           | 11109.13755          | 10056.92119          |
| B5DF89           | Cul3      | Cullin-3                                                                   | 234.173           | 15.36    | 88932  | 9         | 41767.32971         | 46972.16798         | 41273.92146         | 52735.05192         | 49025.81366         | 36297.86409           | 42389.42512           | 49405.55491           | 47472.87815           | 52598.50765           | 51685.67753          | 52042.30684          | 54092.76837          | 47863.34329          | 46421.65465          |
| B5DF91           | Elavl1    | ELAV-like protein 1                                                        | 298.701           | 33.13    | 36169  | 8         | 143292.3387         | 123840.6449         | 144173.6677         | 124160.4279         | 133434.3308         | 131075.0413           | 152263.8724           | 140035.0069           | 137379.1673           | 140371.3398           | 135046.984           | 134895.4308          | 150930.318           | 140777.2369          | 140966.4707          |
| B9EJ86           | Ospb18    | Oxysterol-binding protein-related protein 8                                | 668.143           | 27.11    | 101269 | 18        | 278513.1669         | 271911.7461         | 268075.5864         | 249974.3599         | 246843.7174         | 299100.6129           | 355227.974            | 342382.983            | 340763.1951           | 324279.8038           |                      |                      |                      |                      |                      |

|        |         |                                                             |          |       |        |    |             |             |             |             |               |             |             |             |             |             |             |             |             |             |             |
|--------|---------|-------------------------------------------------------------|----------|-------|--------|----|-------------|-------------|-------------|-------------|---------------|-------------|-------------|-------------|-------------|-------------|-------------|-------------|-------------|-------------|-------------|
| D4A631 | Arfgef1 | Brefeldin A-inhibited guanine nucleotide-exchange protein 1 | 177.655  | 3.25  | 207890 | 5  | 17438.37484 | 15652.28154 | 17254.61831 | 15578.3175  | 16015.48295   | 16165.7652  | 15076.59161 | 18059.53689 | 11593.50374 | 17042.46985 | 12704.53917 | 14641.91264 | 15290.29873 | 16047.2641  | 16869.88196 |
| D4AE41 | Rbmxd1  | RNA binding motif protein, X-linked-like-1                  | 209.356  | 15.98 | 42250  | 7  | 161433.3002 | 162972.5616 | 172382.8598 | 172738.1314 | 175003.3189   | 152573.7196 | 170435.2818 | 141831.4852 | 151609.47   | 152120.757  | 174188.5247 | 167344.3619 | 182227.0242 | 177162.7353 | 159462.7568 |
| E9PVA8 | Gcn1    | eIF-2-alpha kinase activator GCN1                           | 950.724  | 15.46 | 293021 | 30 | 201110.6101 | 195927.4064 | 202721.2273 | 206996.3855 | 200843.1709   | 259928.2996 | 256546.9955 | 247360.7911 | 268080.4388 | 217864.0713 | 206431.9654 | 218210.9091 | 192418.8724 | 204103.5442 | 211272.7761 |
| E9PVX6 | Mki67   | Proliferation marker protein Ki-67                          | 309.544  | 7.9   | 350864 | 12 | 53153.83644 | 63441.61202 | 73201.84314 | 69799.63733 | 75052.84193   | 47396.88177 | 65364.98676 | 48253.58573 | 54361.01889 | 54967.30309 | 73694.59389 | 58538.26462 | 61400.47017 | 67573.28177 | 60377.01672 |
| E9Q1P8 | Irf2bp2 | Interferon regulatory factor 2-binding protein 2            | 130.928  | 11.58 | 59292  | 4  | 29222.02642 | 29130.12469 | 29079.3852  | 25268.41734 | 29745.12528   | 26522.79874 | 23439.16967 | 24055.63916 | 24191.26682 | 24490.75706 | 28296.70142 | 28520.91357 | 24633.77794 | 25203.11433 | 25177.65695 |
| E9Q3L2 | Pl4ka   | Phosphatidylinositol 4-kinase alpha                         | 102.128  | 1.62  | 237042 | 2  | 5458.826993 | 5357.480423 | 4704.588883 | 4364.419911 | 4546.641908   | 4982.128573 | 4742.564964 | 3973.061039 | 4879.431734 | 4714.122774 | 5210.215947 | 4944.907362 | 4333.335112 | 5958.950795 | 847.0776106 |
| E9Q555 | Rnf123  | E3 ubiquitin-protein ligase RNF213                          | 1509.702 | 11.59 | 584784 | 40 | 185282.779  | 192406.6481 | 173891.2088 | 206454.8135 | 174660.137    | 231588.8638 | 230885.9772 | 245923.2196 | 245008.3715 | 211914.41   | 182647.8074 | 199871.5017 | 163673.268  | 174015.2872 | 173996.4321 |
| E9Q634 | Myo1e   | Unconventional myosin-le                                    | 753.556  | 27.55 | 126818 | 22 | 215521.1424 | 257169.21   | 224111.7135 | 239053.7398 | 214177.4893   | 236270.5047 | 256880.7006 | 255674.6101 | 250748.4394 | 241243.1439 | 244899.9563 | 222625.3143 | 258838.7068 | 240091.1576 | 244911.8471 |
| E9Q7G0 | Numa1   | Nuclear mitotic apparatus protein 1                         | 1707.656 | 34.62 | 235630 | 48 | 439269.3358 | 446280.1195 | 446012.6279 | 444480.6285 | 460376.3457   | 354781.589  | 339391.3523 | 392140.642  | 361472.9119 | 366912.6338 | 441828.0124 | 383603.1361 | 430440.9465 | 401908.4759 | 421287.207  |
| F1LMZ8 | Psmd11  | 26S proteasome non-ATPase regulatory subunit 11             | 596.643  | 43.13 | 47464  | 16 | 279823.4771 | 285585.8642 | 293265.9883 | 290393.8531 | 289354.9969   | 332846.964  | 342161.5596 | 339914.0161 | 339946.4065 | 311994.2757 | 271739.0024 | 305926.7993 | 307423.6998 | 314320.4353 | 309937.4481 |
| F1LNI5 | Ppm1g   | Protein phosphatase 1G                                      | 85.929   | 4.43  | 58743  | 2  | 10075.60935 | 11628.80792 | 12425.30629 | 11562.20639 | 11956.03697   | 12817.39842 | 12883.62146 | 11210.4511  | 12338.8274  | 11253.14865 | 13541.18389 | 10597.07241 | 10709.27709 | 11317.42762 | 11376.96518 |
| F1LNJ2 | Snmp200 | U5 small nuclear ribonucleoprotein 200 kDa helicase         | 1370.18  | 26.18 | 244875 | 39 | 262417.4071 | 290472.9393 | 269195.9117 | 276014.3513 | 291651.1202   | 260596.4615 | 294304.5049 | 290638.6581 | 287971.7478 | 278404.7604 | 263713.2769 | 290307.7097 | 273160.0374 | 276386.4235 | 282437.4005 |
| F1LP64 | Tripl2  | E3 ubiquitin-protein ligase TRIP12                          | 297.575  | 6.62  | 223928 | 10 | 44539.04532 | 50029.19134 | 49479.52996 | 44976.23863 | 46200.53068   | 36539.47557 | 44421.80799 | 38328.46301 | 47784.34557 | 46411.22755 | 44204.57003 | 32841.63828 | 45033.03378 | 39578.49996 | 45449.03428 |
| F1LP90 | Mink1   | Missshapen-like kinase 1                                    | 27.601   | 2.47  | 150382 | 2  | 11024.30016 | 15081.66798 | 11827.71378 | 15966.97397 | 14967.15403   | 17661.32351 | 18061.42618 | 15712.04781 | 19978.49216 | 2421.042407 | 17044.25457 | 16134.16684 | 11313.0198  | 12750.83022 | 16431.016   |
| F1LQ48 | Hnmp1   | Heterogeneous nuclear ribonucleoprotein L                   | 894.689  | 60.67 | 67903  | 25 | 508020.3411 | 525763.589  | 496055.2591 | 470609.2495 | 515460.3272   | 443745.0093 | 419379.9763 | 422833.3292 | 402523.7539 | 393307.5166 | 493381.4631 | 474475.7906 | 518757.8561 | 472038.4304 | 418205.2732 |
| F1LSG8 | Vps50   | Syndetin                                                    | 85       | 3.63  | 111188 | 3  | 11660.58149 | 8828.764901 | 12369.52825 | 14460.24762 | 8760.917761   | 12899.47999 | 8914.31114  | 12038.35967 | 8030.472619 | 6468.306519 | 12168.47146 | 8195.903357 | 12750.84085 | 8566.247604 |             |
| F1MOZ7 | Trio    | Triple functional domain protein                            | 43.187   | 1.23  | 347860 | 2  | 5516.774821 | 5610.4579   | 2691.678099 | 5603.847519 | 5824.894999   | 4897.668496 | 6686.596107 | 4703.810713 | 5498.399482 | 5791.564787 | 4616.570085 | 5596.200575 | 5591.095415 | 4924.195488 | 4883.89971  |
| F1MT75 | Diaph1  | Protein diaphanous homolog 1                                | 461.72   | 12.65 | 140409 | 12 | 74301.01755 | 63867.21722 | 70912.56351 | 66907.67654 | 66772.91037   | 88987.74537 | 72320.80222 | 82604.71023 | 79406.58080 | 70400.35136 | 70435.24628 | 84727.62534 | 75094.26139 | 78768.18124 | 76151.16052 |
| F6ZDS4 | Tpr     | Nucleoprotein TPR                                           | 576.672  | 10.08 | 273990 | 17 | 101036.6403 | 95580.01841 | 10815.69    | 114724.527  | 99262.96415   | 99328.18174 | 100802.8106 | 101070.6666 | 99357.55794 | 101480.2303 | 100625.176  | 98635.09292 | 95943.1153  | 98497.91419 | 100402.4765 |
| G3V6S8 | Srsf6   | Serine/arginine-rich splicing factor 6                      | 94.874   | 9.14  | 39025  | 3  | 131356.9627 | 123124.2799 | 135216.0577 | 130876.7389 | 118565.3731   | 121574.86   | 122810.6007 | 124721.4906 | 99870.77563 | 108388.3523 | 123883.8383 | 122067.1418 | 130715.4694 | 117437.9506 | 122848.4435 |
| G3V9R8 | Hnmpc   | Heterogeneous nuclear ribonucleoprotein C                   | 583.779  | 37.25 | 32857  | 13 | 263892.2574 | 268958.4716 | 297709.8396 | 298336.946  | 241350.0622   | 280079.5601 | 290836.1622 | 305227.723  | 264340.0022 | 258167.6935 | 256957.9686 | 265399.688  | 300347.3455 | 321532.1236 | 289773.28   |
| G5E829 | Atp2b1  | Plasma membrane calcium-transporting ATPase 1               | 383.056  | 12.54 | 134747 | 11 | 95333.44539 | 83266.98391 | 67533.03365 | 83602.28587 | 76960.26327   | 97361.17951 | 107473.8329 | 102404.2432 | 98695.21313 | 100208.6186 | 81592.63876 | 71434.07014 | 85043.95941 | 77302.03488 | 80838.33963 |
| O08528 | Hk2     | Hexokinase-2                                                | 826.505  | 39.04 | 102535 | 30 | 336599.2744 | 346847.3301 | 380622.5464 | 344898.8776 | 354229.723    | 288574.6415 | 317923.3325 | 311154.9489 | 311559.7274 | 231115.7525 | 298499.8211 | 326225.234  | 288512.0167 | 336510.8898 | 334060.9116 |
| O08529 | Capn2   | Calpain-2 catalytic subunit                                 | 654.542  | 36.43 | 79872  | 20 | 267259.7078 | 238570.0838 | 220517.6113 | 231706.9704 | 235493.4036   | 209204.1446 | 220068.4175 | 196243.0881 | 212122.2499 | 211830.706  | 224969.3903 | 232441.2282 | 232405.3017 | 229032.8006 | 245970.5366 |
| O08539 | Bin1    | Myc box-dependent-interacting protein 1                     | 97.106   | 8.5   | 64470  | 3  | 19987.8848  | 13134.53783 | 23685.9639  | 21277.56344 | 10255.34579   | 7840.56321  | 21354.47712 | 10557.50489 | 17050.0486  | 22382.96236 | 14379.73057 | 12948.22383 | 15306.94409 | 21781.43477 | 12108.77839 |
| O08547 | Sec22b  | Vesicle-trafficking protein SEC22b                          | 311.197  | 61.4  | 24741  | 9  | 55213.13907 | 57161.55137 | 51205.57047 | 53609.97062 | 47546.43156   | 41965.37976 | 54371.37489 | 46911.19483 | 47180.723   | 45216.09043 | 46356.60138 | 55638.95467 | 53061.16307 | 46807.84558 | 52552.28615 |
| O08553 | Dpysl2  | Dihydropyrimidinase-related protein 2                       | 1630.64  | 79.2  | 62278  | 33 | 1961265.623 | 1932813.829 | 1857964.148 | 1832358.196 | 1964268.572   | 1376391.05  | 1421111.213 | 1429171.027 | 1394428.273 | 1458417.048 | 1687801.742 | 1638124.239 | 1743962.126 | 1737091.316 | 1726232.076 |
| O08560 | Dgkz    | Diacylglycerol kinase zeta                                  | 32.898   | 3.77  | 104009 | 2  | 5328.804581 | 6562.205385 | 6029.369694 | 6718.587188 | 6259.582551   | 5231.534768 | 5796.358305 | 3742.869912 | 0.012083387 | 7401.013001 | 4547.578584 | 4649.261571 | 6532.658534 | 5698.34826  | 5135.424435 |
| O08561 | Pl4kb   | Phosphatidylinositol 4-kinase beta                          | 40.23    | 1.96  | 91655  | 2  | 3428.329116 | 5854.973486 | 2252.571783 | 5986.317077 | 7248.022766   | 6854.059629 | 7117.996965 | 6173.434552 | 6462.831986 | 5516.452577 | 5814.830529 | 6530.811141 | 6724.711238 | 6613.256621 | 6816.709947 |
| O08579 | Emk     | Emerin                                                      | 135.864  | 29.73 | 29436  | 4  | 33310.16991 | 36331.52768 | 41143.73544 | 37955.13745 | 33112.88212   | 59025.58438 | 33631.81628 | 37590.44466 | 35220.46279 | 39816.97577 | 39681.79373 | 34320.86337 | 36431.16238 | 36690.17686 | 35851.38    |
| O08583 | Allyref | THO complex subunit 4                                       | 246.457  | 41.96 | 26940  | 5  | 40968.7675  | 49909.66736 | 43169.28129 | 42314.85772 | 35822.14964   | 24740.14118 | 29577.97894 | 20919.46735 | 21638.09087 | 29099.20373 | 39971.73424 | 36668.37872 | 41152.07582 | 32823.23373 | 31139.03515 |
| O08585 | Cita    | Claithrin light chain 1                                     | 53.48    | 3.88  | 25604  | 2  | 0.008226335 | 2573.714592 | 851.9605061 | 162.7194985 | 606.9259413   | 2019.7958   | 0.012348474 | 1698.867431 | 0.01320187  | 414.1805425 | 108.0626992 | 417.107871  | 0.00945634  | 159.5268437 |             |
| O08599 | Stxbp1  | Syntaxin-binding protein 1                                  | 53.807   | 5.22  | 67569  | 2  | 4093.520339 | 3320.638775 | 8498.689899 | 8860.94723  | 3384.511241   | 9974.878542 | 3409.083376 | 6329.545839 | 6598.244462 | 9138.70884  | 3205.40215  | 3076.893949 | 9384.895157 | 2459.446034 | 10482.36393 |
| O08618 | Prpsap2 | Phosphoribosyl pyrophosphate synthase-associated protein 2  | 66.222   | 9.49  | 40867  | 3  | 13753.68614 | 13931.74595 | 13020.32756 | 5605.415778 | 22774.48511   | 8904.493913 | 21901.08695 | 16437.08589 | 11799.96804 | 15634.37624 | 14111.8431  | 13924.13049 | 17216.30652 | 10767.14785 | 9097.38664  |
| O08638 | Myh11   | Myosin-11                                                   | 625.102  | 7.86  | 227028 | 18 | 720522.0811 | 724313.0589 | 642229.0812 | 670649.7289 | 581439.1076   | 619695.3459 | 615293.1115 | 612514.0571 | 613903.9091 | 629362.6475 | 681100.2457 | 660945.2051 | 692605.0268 | 68475.14895 | 664403.2106 |
| O08697 | Adp1    | ADP-ribosylation factor-like protein 2                      | 99.388   | 24.46 | 20836  | 3  | 2090.132762 | 16048.02972 | 8599.294746 | 10455.08337 | 8253.72102    | 9720.300249 | 10883.57307 | 8846.464591 | 11806.35562 | 9081.126538 | 7701.088119 | 11282.12681 | 8922.514468 | 864194.18   | 8918.16186  |
| O08700 | Vps45   | Vacuolar protein sorting-associated protein 45              | 189.022  | 14.74 | 64894  | 7  | 33060.78616 | 30485.68581 | 22298.54777 | 31551.65278 | 18066.56596   | 26437.44466 | 29017.73485 | 29360.47845 | 29404.81628 | 29576.53929 | 26012.58807 | 23892.42659 | 33372.41186 | 29264.75167 | 31294.37146 |
| O08709 | Prdx6   | Peroxiredoxin-6                                             | 499.923  | 80.36 | 24871  | 13 | 426853.7228 | 394210.2557 | 381962.0024 | 361269.4076 | 375503.8617   | 341041.246  | 314778.0527 | 298759.3456 | 332688.5202 | 320213.0175 | 384276.7918 | 364521.8387 | 366404.3473 | 345348.1796 | 347837.7792 |
| O08734 | Bak1    | Bcl-2 homologous antagonist/killer                          | 209.444  | 36.84 | 23295  | 6  | 59723.6264  | 71470.5229  | 72658.36562 | 71379.47457 | 69548.25103   | 71093.6942  | 68860.34584 | 60275.25018 | 68105.37607 | 70425.9794  | 63130.46    | 91859.27797 | 73307.11939 | 71781.4711  | 71030.19802 |
| O08738 | Casp6   | Caspase-6                                                   | 73.728   | 14.49 | 31595  | 4  | 3813.155027 | 9613.305031 | 9759.573623 | 8397.546267 | 11796.06677</ |             |             |             |             |             |             |             |             |             |             |

|        |          |                                                               |          |       |        |    |             |               |             |             |             |             |             |             |             |             |             |             |             |             |             |
|--------|----------|---------------------------------------------------------------|----------|-------|--------|----|-------------|---------------|-------------|-------------|-------------|-------------|-------------|-------------|-------------|-------------|-------------|-------------|-------------|-------------|-------------|
| O09131 | Gsto1    | Glutathione S-transferase omega-1                             | 126.438  | 29.17 | 27498  | 6  | 72297.83908 | 74790.95277   | 67611.91366 | 72476.04509 | 74649.40189 | 66409.62511 | 66618.04817 | 52717.10604 | 62418.48711 | 64831.29444 | 75354.43373 | 68074.62478 | 72814.14585 | 72848.83179 | 72914.08956 |
| O09159 | Man2b1   | Lysosomal alpha-mannosidase                                   | 557.178  | 24.38 | 114648 | 17 | 247770.8613 | 219268.2579   | 223566.0724 | 240154.3273 | 217784.1645 | 114832.5951 | 141303.3051 | 104673.6978 | 123056.6201 | 140026.973  | 186737.5457 | 200474.3643 | 207592.1826 | 213967.0738 | 195561.7844 |
| O09167 | Rpl21    | 60S ribosomal protein L21                                     | 125.555  | 36.88 | 18562  | 7  | 383426.6024 | 393902.4956   | 383249.9495 | 397415.8086 | 392568.5291 | 423591.248  | 446812.2103 | 449680.328  | 401700.4403 | 385041.1151 | 373324.0681 | 402530.7517 | 397095.2368 | 411963.0992 | 400282.001  |
| O09172 | Gclm     | Glutamate-cysteine ligase regulatory subunit                  | 94.314   | 10.22 | 30535  | 2  | 19624.76202 | 11948.05719   | 27803.11386 | 10955.41866 | 14922.21359 | 26885.20324 | 27962.19346 | 29009.42781 | 14849.85114 | 12231.00855 | 11481.52243 | 21908.2158  | 23479.24567 | 13282.67249 | 12392.14874 |
| O35114 | Scarb2   | Lysosome membrane protein 2                                   | 48.249   | 12.97 | 54044  | 4  | 30316.47658 | 30666.68089   | 24432.10013 | 27695.8709  | 26692.20054 | 25697.76145 | 21418.62898 | 13517.70792 | 23804.86125 | 28801.53419 | 31733.77234 | 32465.75031 | 36355.79265 | 33655.08429 | 29954.49763 |
| O35129 | Phb2     | Prohibitin-2                                                  | 503.598  | 58.19 | 33296  | 15 | 539452.609  | 533144.1438   | 545562.4059 | 546039.5226 | 533728.173  | 619590.8847 | 615948.8154 | 614025.0041 | 566651.6973 | 631998.2862 | 528597.5253 | 546438.7988 | 572753.1169 | 597217.4068 | 547113.4311 |
| O35130 | Emg1     | Ribosomal RNA small subunit methyltransferase NEP1            | 98.513   | 18.85 | 26974  | 3  | 5524.497828 | 8162.521749   | 4395.34358  | 4869.467406 | 4134.284574 | 9606.060172 | 7809.09321  | 12391.32976 | 9578.469075 | 9821.355099 | 6326.899201 | 4670.56401  | 10637.45625 | 8752.020794 | 9784.24538  |
| O35143 | ATP5IF1  | ATPase inhibitor, mitochondrial                               | 26.206   | 22.64 | 12159  | 2  | 28871.96706 | 3727.046058   | 28828.19262 | 1282.188338 | 27243.02705 | 21817.29254 | 19272.77135 | 0.01388636  | 0.012083387 | 0.013320187 | 24744.66123 | 21646.99374 | 26769.33432 | 19248.2587  | 22935.91367 |
| O35215 | Ddt      | D-dopachrome decarboxylase                                    | 43.602   | 19.49 | 13077  | 2  | 10885.33576 | 8554.171696   | 9951.440345 | 8989.832189 | 6308.390919 | 8427.474064 | 7788.752186 | 6461.891594 | 3496.355549 | 7471.754915 | 11162.6488  | 9106.340363 | 8313.999335 | 3254.975545 | 6190.474563 |
| O35226 | Psmd4    | 26S proteasome non-ATPase regulatory subunit 4                | 259.238  | 24.2  | 40704  | 7  | 115665.335  | 114185.981    | 103741.7591 | 100749.1957 | 102771.7882 | 116355.7845 | 115907.3345 | 104963.3465 | 110333.4299 | 97174.92607 | 110610.6555 | 108300.2051 | 97876.56763 | 99676.74149 | 102996.9735 |
| O35239 | Ptpn9    | Tyrosine-protein phosphatase non-receptor type 9              | 99.563   | 10.29 | 67970  | 4  | 16032.28745 | 9544.6175     | 14581.49701 | 16526.96729 | 16113.03972 | 4489.361612 | 6487.360393 | 5955.213884 | 8027.323188 | 10047.08065 | 12526.52116 | 4801.850072 | 5086.121077 | 7721.337129 | 9842.818618 |
| O35263 | Pafah1b3 | Platelet-activating factor acetylhydrolase 1B subunit gamma   | 86.012   | 13.36 | 25863  | 2  | 19507.23443 | 16855.12914   | 22768.79417 | 21588.22311 | 21041.22335 | 19383.19381 | 21777.15767 | 13764.57268 | 14300.73522 | 16542.04541 | 16195.33303 | 20647.34373 | 19569.15528 | 17107.11528 | 19907.18185 |
| O35264 | Pafah1b2 | Platelet-activating factor acetylhydrolase 1B subunit beta    | 163.641  | 36.68 | 25581  | 4  | 60608.61967 | 47504.85698   | 47533.78183 | 53364.39139 | 40903.16899 | 28690.70646 | 36217.41697 | 29693.02899 | 42991.38255 | 39551.90406 | 45321.23623 | 48156.58165 | 44880.21993 | 46404.73128 | 40359.38118 |
| O35286 | Dhx15    | Pre-mRNA-splicing factor ATP-dependent RNA helicase DHX15     | 433.044  | 24.91 | 91007  | 16 | 211779.5912 | 214119.2965   | 214393.0153 | 212886.8203 | 218954.6432 | 220254.6394 | 223073.3199 | 227012.914  | 220258.8643 | 216533.4113 | 200723.3999 | 211674.9368 | 215891.2573 | 221588.9213 | 222199.348  |
| O35295 | Purb     | Transcription activator protein Pur-beta                      | 243.206  | 24.38 | 33901  | 4  | 61228.52339 | 56841.44566   | 48897.10458 | 48587.20478 | 57210.91102 | 41274.09953 | 44499.11561 | 46527.98338 | 39763.68335 | 45799.87759 | 62941.6789  | 55180.07368 | 55258.40491 | 46046.40693 | 56111.69535 |
| O35303 | Dnm1l    | Dynamin-1-like protein                                        | 215.368  | 14.3  | 83908  | 7  | 40620.0891  | 37092.44282   | 37957.04293 | 35192.40897 | 36350.79265 | 39129.55545 | 31332.81442 | 65052.63693 | 42363.708   | 29702.2652  | 39113.71622 | 37238.21443 | 37485.49424 | 40090.8137  | 44334.93206 |
| O35309 | Nmi      | N-myc-interactor                                              | 89.153   | 13.69 | 35236  | 2  | 8403.700264 | 7865.951219   | 7737.733645 | 7167.87607  | 8543.252402 | 5613.99147  | 6831.476864 | 6779.172274 | 8783.932011 | 6900.280534 | 7245.617931 | 8116.635704 | 8915.63746  | 7450.288838 | 6750.89022  |
| O35316 | Slc6a6   | Sodium- and chloride-dependent taurine transporter            | 23.147   | 2.9   | 69856  | 2  | 6444.583574 | 6892.853597   | 7670.94849  | 9158.332876 | 8548.51048  | 7992.771283 | 8110.598925 | 15393.91652 | 15171.12574 | 11034.25555 | 9854.307809 | 8582.82355  | 7540.801877 | 6863.673699 | 10187.90472 |
| O35326 | Srsf5    | Serine/arginine-rich splicing factor 5                        | 49.024   | 8.92  | 30891  | 2  | 102740.2156 | 93251.40693   | 111019.5468 | 111612.1112 | 99864.9088  | 100943.0082 | 101518.4232 | 103713.949  | 104097.8465 | 88348.15769 | 95393.369   | 102240.4311 | 108142.6601 | 86686.63396 | 101771.3155 |
| O35343 | Kpna4    | Importin subunit alpha-3                                      | 134.512  | 13.63 | 57923  | 5  | 48704.66822 | 38664.84677   | 63555.2016  | 54716.31754 | 47456.23864 | 29522.58473 | 56096.70369 | 62959.27518 | 65366.10851 | 30854.25491 | 47043.31915 | 45071.70861 | 42734.17497 | 44266.68126 | 48096.42636 |
| O35344 | Kpna3    | Importin subunit alpha-4                                      | 211.239  | 15.16 | 57773  | 5  | 31438.46029 | 43897.72081   | 43374.92375 | 47740.50098 | 46441.70364 | 54357.77439 | 60651.3334  | 65457.47986 | 53537.1917  | 50163.5908  | 45047.89528 | 49747.38566 | 52120.37874 | 45862.89248 | 50684.85732 |
| O35345 | Kpna6    | Importin subunit alpha-7                                      | 106.416  | 8.58  | 59964  | 3  | 7460.152475 | 10148.98024   | 10058.52083 | 8397.742895 | 9362.546237 | 8742.846026 | 10036.15984 | 11583.20612 | 10640.4153  | 8643.890537 | 9999.588955 | 10062.2279  | 7577.077141 | 9269.609996 | 7812.956577 |
| O35350 | Capn1    | Calpain-1 catalytic subunit                                   | 199.376  | 16.83 | 82106  | 8  | 46764.44178 | 48541.29361   | 45719.6462  | 49192.5022  | 44429.50014 | 31044.48189 | 47810.81583 | 43388.32956 | 35628.9296  | 42552.10299 | 45581.55806 | 47773.18303 | 40249.01446 | 33629.98716 | 42769.51454 |
| O35381 | Anp32a   | Acidic leucine-rich nuclear phosphoprotein 32 family member A | 234.908  | 25.51 | 28538  | 8  | 363948.2856 | 272991.0541   | 340428.1987 | 298048.1296 | 320601.8944 | 222746.0631 | 275804.3667 | 225191.3292 | 273727.8996 | 249687.6895 | 279477.9534 | 294400.0604 | 276290.5626 | 334761.5805 | 294519.3661 |
| O35382 | Exoc4    | Exocyst complex component 4                                   | 240.907  | 10.15 | 110545 | 7  | 18305.48817 | 24614.41154   | 18322.13983 | 17918.55617 | 14207.01324 | 16205.62969 | 11944.89892 | 22026.24839 | 19776.59991 | 15377.47479 | 19491.88728 | 19615.66987 | 16461.86392 | 14347.72938 | 13369.00264 |
| O35435 | Dhohd    | Dihydroorotate dehydrogenase (quinone), mitochondrial         | 55.499   | 11.9  | 42700  | 2  | 3613.34273  | 3572.200151   | 4966.831086 | 4277.690755 | 3742.867222 | 3309.769495 | 3869.63824  | 4260.174575 | 3216.57415  | 2879.550081 | 1023.15025  | 5197.343393 | 4189.80808  | 3510.688538 | 4173.314394 |
| O35459 | Ech1     | Delta(3,5)-Delta(2,4)-dienoyl-CoA isomerase, mitochondrial    | 99.792   | 7.03  | 36118  | 2  | 4102.762915 | 4306.964953   | 3470.003362 | 3760.305832 | 3086.044754 | 3831.763779 | 3591.454903 | 3188.013686 | 3322.553428 | 4266.631561 | 5493.266383 | 3474.084355 | 4382.671761 | 3667.219611 | 4751.048782 |
| O35465 | Fkbp8    | Peptidyl-prolyl cis-trans isomerase FKBP8                     | 239.618  | 24.13 | 43529  | 6  | 48640.61386 | 55559.34017   | 49244.15951 | 52644.07457 | 50377.23613 | 54753.29329 | 52163.832   | 58841.92098 | 52449.52375 | 48111.08986 | 51064.09554 | 52309.89156 | 51453.05325 | 53590.40043 | 63085.01206 |
| O35495 | Cdk14    | Cyclin-dependent kinase 14                                    | 62.015   | 3.41  | 52996  | 2  | 1613.716891 | 1531.455805   | 0.009509917 | 1820.8997   | 1331.9565   | 1907.263423 | 1494.565148 | 1899.544419 | 2146.174149 | 2075.22165  | 1989.844437 | 1123.166297 | 1560.91759  | 1664.01747  | 1370.712908 |
| O35509 | Rab11b   | Ras-related protein Rab-11B                                   | 284.8    | 57.34 | 24489  | 11 | 503272.6597 | 499734.6012   | 483091.6059 | 501161.1304 | 502336.4907 | 506993.922  | 512924.9033 | 497842.2221 | 498533.7303 | 522081.8088 | 526637.224  | 479367.345  | 533580.1861 | 545834.343  | 514391.1326 |
| O35522 | Psmb9    | Proteasome subunit beta type-9                                | 88.912   | 26.03 | 23427  | 4  | 104274.5423 | 100427.7084   | 106939.64   | 105195.9887 | 114456.737  | 96459.82099 | 101160.8917 | 99964.06957 | 104913.0884 | 96858.65155 | 101201.9193 | 104077.3408 | 109313.6341 | 108666.6566 | 96699.99512 |
| O35550 | Rabep1   | Rab GTPase-binding effector protein 1                         | 27.948   | 3.25  | 99428  | 2  | 6288.795826 | 5290.666027   | 5181.300219 | 6398.813732 | 4562.714871 | 3783.984835 | 5807.910303 | 7548.003622 | 5939.926802 | 6157.021231 | 5939.361444 | 5249.570371 | 7019.51945  | 9119.932121 | 6027.209264 |
| O35593 | Psmd14   | 26S proteasome non-ATPase regulatory subunit 14               | 213.025  | 36.13 | 34577  | 5  | 69209.88668 | 70664.61139   | 67243.6421  | 66149.32715 | 66341.416   | 69671.94172 | 72141.37862 | 73351.4656  | 77332.43155 | 69739.35707 | 68452.82543 | 74127.79615 | 71759.52255 | 70362.3062  | 67187.44696 |
| O35601 | Fyb1     | FYN-binding protein 1                                         | 254      | 13.92 | 90055  | 9  | 44146.93705 | 51145.92571   | 54788.92164 | 54260.37612 | 48076.26485 | 59323.01775 | 65730.55716 | 57310.01251 | 55452.1306  | 56971.58495 | 45898.74797 | 51838.51622 | 54700.31676 | 43675.54183 | 45595.74296 |
| O35604 | Npc1     | NPC intracellular cholesterol transporter 1                   | 62.038   | 2.58  | 142885 | 4  | 54234.16404 | 48165.4718    | 34510.52046 | 94778.14691 | 29494.07874 | 25409.06101 | 29798.75114 | 33881.32513 | 40806.69714 | 30159.50726 | 34020.27146 | 33982.02296 | 48380.99531 | 49270.07783 | 51201.71778 |
| O35609 | Scamp3   | Secretory carrier-associated membrane protein 3               | 184.82   | 16.33 | 38488  | 3  | 28458.28522 | 33162.08901   | 28275.20043 | 26463.65747 | 29562.74943 | 23371.83155 | 25320.0275  | 23891.75581 | 23990.70374 | 22588.36297 | 29830.21849 | 28416.26715 | 31287.48329 | 30177.48703 | 29038.85437 |
| O35638 | Stag2    | Cohesin subunit SA-2                                          | 177.342  | 8.12  | 141281 | 7  | 31000.87272 | 27637.30761   | 28310.88402 | 37024.77255 | 26422.90092 | 26416.49827 | 29454.67943 | 28111.81006 | 28493.6111  | 31034.25393 | 41575.26924 | 26514.49689 | 30468.56627 | 30180.18209 | 18787.1975  |
| O35639 | Anxa3    | Annexin A3                                                    | 1159.261 | 73.99 | 36384  | 27 | 1196052.963 | 1200598.235   | 1067847.339 | 1110616.698 | 1145943.776 | 1034128.825 | 1029181.709 | 1012668.448 | 1048517.447 | 1085266.398 | 1183991.444 | 1115642.143 | 1179338.314 | 1160695.265 | 1167628     |
| O35643 | Ap1b1    | AP-1 complex subunit beta-1                                   | 982.506  | 39.45 | 103935 | 25 | 312119.6419 | 329410.4867   | 318067.5678 | 313881.398  | 290494.3298 | 264462.0126 | 294434.0404 | 275082.1028 | 288442.5649 | 273336.8289 | 306938.1348 | 297210.2615 | 303215.7835 | 302618.8581 | 294349.4346 |
| O35654 | Pol2     | DNA polymerase delta subunit 2                                | 107.401  | 9.59  | 51355  | 3  | 15092.8636  | 9680.313706</ |             |             |             |             |             |             |             |             |             |             |             |             |             |

|        |          |                                                                                               |          |       |        |    |             |             |             |             |             |             |             |             |             |             |             |             |              |             |             |
|--------|----------|-----------------------------------------------------------------------------------------------|----------|-------|--------|----|-------------|-------------|-------------|-------------|-------------|-------------|-------------|-------------|-------------|-------------|-------------|-------------|--------------|-------------|-------------|
| O35864 | Cops5    | COP9 signalosome complex subunit 5                                                            | 113.598  | 20.06 | 37549  | 6  | 68889.41334 | 76681.79869 | 70412.93146 | 74244.94922 | 78083.22981 | 70837.10309 | 79089.78473 | 73122.75032 | 75154.86023 | 71470.16218 | 67816.20871 | 77417.98141 | 75125.14327  | 74370.59797 | 74309.66358 |
| O35887 | Calu     | Calumenin                                                                                     | 199.75   | 31.43 | 37064  | 8  | 75091.97969 | 67573.45884 | 61175.62054 | 72058.67734 | 71158.78752 | 106466.14   | 84362.15715 | 91645.17511 | 96126.45424 | 70223.53254 | 80796.85578 | 71026.99158 | 68694.00403  | 62743.00714 | 75583.40946 |
| O35892 | Sp100    | Nuclear autoantigen Sp-100                                                                    | 15.562   | 4.56  | 54727  | 2  | 14486.63925 | 9973.78081  | 12686.96573 | 16443.70743 | 11300.47996 | 17618.86185 | 14288.04738 | 17720.54308 | 12075.10446 | 15255.5085  | 15689.58128 | 15668.22806 | 10130.45155  | 16088.18523 | 15092.79207 |
| O35900 | Lsm2     | U6 snRNA-associated Sm-like protein LSm2                                                      | 101.258  | 28.42 | 10835  | 2  | 13696.00513 | 12761.09534 | 10445.96437 | 11671.54085 | 11453.78788 | 9990.600645 | 10576.61779 | 7028.590454 | 10779.66727 | 11601.63558 | 10941.00008 | 11856.501   | 12793.63904  | 11963.01429 | 11339.66121 |
| O35955 | Psmb10   | Proteasome subunit beta type-10                                                               | 214.461  | 22.34 | 29063  | 4  | 58833.48756 | 51019.74302 | 47943.37873 | 54685.86489 | 53716.58942 | 53190.59563 | 55594.89875 | 54357.60237 | 56538.42709 | 49027.89501 | 56939.85357 | 54037.70322 | 55153.38165  | 55532.47727 | 51846.71588 |
| O35964 | Sh3gl1   | Endophilin-A2                                                                                 | 113.857  | 13.59 | 41492  | 4  | 48640.04213 | 46094.51939 | 41773.13506 | 37002.59911 | 44351.70188 | 31155.78042 | 36954.85858 | 31349.07109 | 31597.55528 | 26603.34204 | 41014.35325 | 36239.32522 | 41557.22567  | 42731.43507 | 34253.36344 |
| O35972 | Mrp123   | 39S ribosomal protein L23, mitochondrial                                                      | 53.308   | 25.34 | 17122  | 2  | 8189.40937  | 3799.502508 | 3770.26146  | 9168.696223 | 6707.670135 | 5034.925783 | 6282.281195 | 4756.855773 | 6559.492254 | 6494.862397 | 6722.013709 | 7250.595235 | 3204.027803  | 6833.412231 | 6458.998432 |
| O35987 | Nsf11c   | NSFL1 cofactor p47                                                                            | 378.771  | 31.08 | 40680  | 8  | 107174.9507 | 115927.5902 | 107765.7761 | 98696.15244 | 101580.9507 | 85149.47096 | 96732.94494 | 80584.58561 | 84036.49398 | 94139.86154 | 116788.5607 | 99167.62673 | 96436.00053  | 96365.39613 | 96761.80537 |
| O54692 | Zw10     | Centromere/kinetochore protein zw10 homolog                                                   | 68.856   | 4.88  | 88063  | 2  | 1916.158232 | 4397.227111 | 2627.358676 | 3664.375813 | 3090.507037 | 885.7265591 | 2212.265192 | 3154.555197 | 3111.579004 | 2602.372376 | 3461.283363 | 2501.771978 | 3546.011122  | 3420.695201 | 3762.952847 |
| O54734 | Ddost    | Dolichyl-diphosphooligosaccharide--protein glycosyltransferase 48 kDa subunit                 | 568.017  | 50.57 | 49028  | 15 | 347296.8667 | 350428.376  | 342539.5525 | 335502.1648 | 349227.1921 | 456906.3485 | 433003.9984 | 425131.0773 | 442426.7466 | 437688.7809 | 358741.9258 | 372391.4234 | 389216.7262  | 395830.3191 | 361921.9782 |
| O54772 | Smardc2  | SWI/SNF-related matrix-associated actin-dependent regulator of chromatin subfamily D member 2 | 71.472   | 7.91  | 59128  | 2  | 8875.578283 | 12671.86734 | 8466.768673 | 9796.081106 | 9268.542757 | 7770.165136 | 9935.466491 | 8557.76678  | 6235.072227 | 8290.674945 | 11194.25917 | 10402.55519 | 1871.127105  | 9575.563954 | 8083.011197 |
| O54774 | Ap3d1    | AP-3 complex subunit delta-1                                                                  | 96.886   | 5.34  | 135081 | 4  | 19319.93517 | 17934.26128 | 17663.24044 | 17329.08577 | 15343.34567 | 13201.16458 | 17280.35895 | 17129.73576 | 18706.98756 | 15282.57512 | 12145.50302 | 13899.84146 | 15228.52496  | 15605.6034  | 16723.51129 |
| O54782 | Man2b2   | Epididymis-specific alpha-mannosidase                                                         | 109.642  | 6.39  | 115610 | 3  | 12811.3841  | 16465.61368 | 9684.222633 | 12485.30892 | 10772.94975 | 5862.544397 | 6227.306159 | 6123.892326 | 6862.095933 | 7879.618172 | 13130.14455 | 12666.16916 | 14841.70547  | 12297.44483 | 10926.00474 |
| O54824 | Il1f6    | Pro-interleukin-16                                                                            | 73.99    | 2.27  | 141435 | 2  | 8600.384744 | 8577.539561 | 5674.170711 | 4634.322006 | 4197.396721 | 7236.354139 | 0.012348474 | 0.01388636  | 0.012083387 | 2959.357381 | 6215.360761 | 3749.685792 | 2719.528439  | 0.00945634  | 2487.664401 |
| O54825 | Bysl     | Bystin                                                                                        | 36.418   | 6.65  | 49784  | 2  | 1718.215494 | 2050.062906 | 2095.043424 | 2175.222446 | 1748.062815 | 1751.082787 | 2503.291745 | 2544.722249 | 2749.138176 | 1920.482903 | 1972.830642 | 1940.129868 | 1797.438089  | 1795.620309 | 1415.3001   |
| O54924 | Exoc8    | Exocyst complex component 8                                                                   | 44.609   | 5.03  | 81043  | 2  | 8218.868905 | 7439.505652 | 8137.922859 | 7784.420754 | 8111.028571 | 5859.277014 | 7689.831647 | 7392.0555   | 6899.175896 | 6366.215566 | 8916.953085 | 9071.546198 | 7578.931532  | 8860.699526 | 7190.340916 |
| O54950 | Prkag1   | 5'-AMP-activated protein kinase subunit gamma-1                                               | 230.611  | 31.21 | 37520  | 6  | 3409.35039  | 10473.03259 | 21404.01878 | 11193.54522 | 19615.95575 | 29537.48802 | 22072.10869 | 73681.87263 | 9874.742423 | 20751.01302 | 28529.78612 | 9007.484321 | 7478.557149  | 21049.56846 | 16101.50295 |
| O54984 | Asna1    | ATPase Asna1                                                                                  | 98.575   | 8.05  | 38823  | 2  | 28603.38338 | 30543.50804 | 27492.24892 | 32187.43496 | 29046.33783 | 31064.09244 | 30830.47232 | 30027.2077  | 30961.88152 | 28527.77437 | 27641.65035 | 28437.72357 | 30399.554    | 30637.54504 | 31088.13442 |
| O54988 | Slk      | STE20-like serine/threonine-protein kinase                                                    | 256.181  | 9     | 141457 | 9  | 68759.82799 | 74734.63546 | 71341.88397 | 77192.14299 | 68474.66888 | 51236.27211 | 52052.10301 | 57633.96739 | 44507.10146 | 56808.91217 | 61015.237   | 64013.89716 | 69621.5378   | 57938.12278 | 60967.72106 |
| O55023 | Impa1    | Inositol monophosphatase 1                                                                    | 249.78   | 32.85 | 30436  | 7  | 149633.2967 | 161967.6073 | 159794.9054 | 133249.3951 | 150299.229  | 113677.8515 | 128182.6191 | 123935.2311 | 122400.0209 | 115945.4071 | 147212.4321 | 137075.172  | 139437.3745  | 135817.7934 | 136951.2913 |
| O55029 | Copb2    | Cotamer subunit beta'                                                                         | 596.274  | 26.52 | 102449 | 14 | 236755.4198 | 251320.8612 | 221556.741  | 229331.7647 | 239437.3094 | 237228.154  | 255257.4196 | 256966.0415 | 254997.8283 | 228459.2277 | 240927.1648 | 247228.5445 | 227592.0692  | 241631.9357 | 241627.5536 |
| O55043 | Arhgef7  | Rho guanine nucleotide exchange factor 7                                                      | 125.311  | 9.6   | 73140  | 5  | 33763.33165 | 35695.03318 | 28639.01896 | 26352.0566  | 32878.77233 | 29908.47646 | 31747.81577 | 27256.68804 | 30017.21442 | 29353.38953 | 30543.19374 | 29288.89277 | 30633.01343  | 28013.85998 | 32815.28322 |
| O55047 | Tlk2     | Serine/threonine-protein kinase tousled-like 2                                                | 46.593   | 2.37  | 82261  | 2  | 2528.013517 | 2911.725497 | 3041.180357 | 2872.093616 | 3288.79619  | 3446.933673 | 2617.227226 | 2160.205274 | 2836.173483 | 2337.604956 | 2256.935561 | 3385.430071 | 2551.014378  | 3065.30142  | 2852.766934 |
| O55098 | Stk10    | Serine/threonine-protein kinase 10                                                            | 145.935  | 5.69  | 111906 | 4  | 32541.1409  | 32701.32236 | 29847.50599 | 29484.96521 | 30252.39897 | 28860.44771 | 32961.76338 | 27055.41567 | 28632.83588 | 28177.11046 | 27598.21175 | 31010.16516 | 30142.83374  | 19850.10034 | 29245.01112 |
| O55125 | Nipsnap1 | Protein NipSnap homolog 1                                                                     | 182.332  | 33.45 | 33363  | 5  | 51999.89959 | 50731.87966 | 47397.39535 | 45965.06702 | 50858.75961 | 47672.73084 | 37042.29504 | 40184.14236 | 43464.64351 | 42662.93361 | 53514.81406 | 41376.73626 | 46402.55683  | 55180.11041 | 44521.86505 |
| O55126 | Nipsnap2 | Protein NipSnap homolog 2                                                                     | 84.772   | 21.71 | 32933  | 4  | 19685.386   | 32179.42493 | 16149.77274 | 16816.99313 | 18081.08701 | 13547.3082  | 14168.76884 | 14337.71481 | 12696.90405 | 11793.75929 | 13218.6944  | 20345.19689 | 13629.79747  | 20793.73429 | 15123.46667 |
| O55128 | Sap18    | Histone deacetylase complex subunit SAP18                                                     | 51.533   | 24.18 | 17595  | 3  | 22867.11451 | 30337.29231 | 26324.56182 | 30620.68259 | 28823.89737 | 24320.79701 | 28535.36332 | 25302.46414 | 28989.72174 | 23210.62216 | 27439.33315 | 22495.02916 | 2841.063086  | 26577.77533 | 27351.67088 |
| O55131 | Sept7    | Septin-7                                                                                      | 479.287  | 43.35 | 50550  | 15 | 183243.7008 | 191115.2446 | 160562.4128 | 178921.748  | 184533.722  | 157132.601  | 172067.1327 | 179574.3326 | 169529.6765 | 166422.4019 | 180869.13   | 171386.4635 | 178460.7668  | 176075.8425 | 170386.7387 |
| O55135 | Eif6     | Eukaryotic translation initiation factor 6                                                    | 213.179  | 30.61 | 26511  | 5  | 136890.0781 | 137495.6452 | 128503.473  | 103037.5053 | 118301.1054 | 125305.9979 | 122617.5323 | 128117.1336 | 120495.2079 | 115881.337  | 106870.9447 | 123673.6736 | 96407.0269   | 123777.5658 | 119767.8772 |
| O55142 | Rpl35a   | 60S ribosomal protein L35a                                                                    | 50.285   | 27.27 | 12554  | 5  | 242272.3294 | 264723.8213 | 247384.5737 | 278058.572  | 294663.3315 | 315193.8154 | 291734.0959 | 309158.507  | 305370.0124 | 294534.3346 | 274913.7982 | 291631.5222 | 291895.8772  | 295546.4995 | 292159.4083 |
| O55143 | Atp2a2   | Sarcoplasmic/endoplasmic reticulum calcium ATPase 2                                           | 625.662  | 20.69 | 114858 | 16 | 149389.7478 | 151301.2434 | 144904.6475 | 144343.2481 | 151449.6381 | 175381.1834 | 170141.6845 | 180312.2955 | 194950.5971 | 151077.7864 | 126036.4088 | 130881.1256 | 135284.2265  | 143388.9361 | 141557.5739 |
| O55166 | Vps52    | Vacuolar protein sorting-associated protein 52 homolog                                        | 137.297  | 6.5   | 82103  | 3  | 543491.0815 | 533071.4236 | 553398.0073 | 558030.0436 | 545203.6319 | 493446.2603 | 535991.4084 | 541695.6232 | 515583.0509 | 584416.5539 | 536135.4123 | 559590.4827 | 563521.117   | 568694.6657 | 569382.3593 |
| O55173 | Pdpk1    | 3-phosphoinositide-dependent protein kinase 1                                                 | 52.966   | 4.47  | 63593  | 2  | 7661.606132 | 7609.824488 | 5594.506132 | 6131.443366 | 6699.040082 | 3958.371248 | 5355.454494 | 1496.85992  | 1686.194712 | 4136.387572 | 5578.849121 | 2523.380685 | 5920.507879  | 3846.443964 | 2220.956351 |
| O55201 | Supt5h   | Transcription elongation factor SPT5                                                          | 105.897  | 5.91  | 120664 | 4  | 8774.614413 | 9793.092011 | 9627.405931 | 10221.81061 | 9873.228501 | 7404.346473 | 9105.131199 | 10353.39193 | 9861.123661 | 9310.324463 | 9153.253333 | 11797.18793 | 8722.062144  | 7522.138106 | 7886.046105 |
| O55234 | Psmb5    | Proteasome subunit beta type-5                                                                | 72.572   | 13.26 | 28532  | 3  | 6192.029444 | 6736.991718 | 6935.147727 | 6640.872952 | 6529.537238 | 0.014539799 | 7180.33978  | 0.01388636  | 6390.763646 | 6399.598885 | 6531.152606 | 7638.573332 | 6127.1416557 | 6501.49646  | 6785.977688 |
| O55242 | Sigmar1  | Sigma non-opioid intracellular receptor 1                                                     | 83.285   | 13.9  | 25250  | 2  | 6797.529884 | 3297.641469 | 7994.169187 | 6476.24646  | 3483.761971 | 6009.797088 | 6866.736388 | 7860.712288 | 8702.739203 | 6080.113336 | 6330.739878 | 8176.123127 | 7101.12626   | 9347.413212 | 6794.248859 |
| O70133 | Dhx9     | ATP-dependent RNA helicase A                                                                  | 1082.594 | 27.17 | 149475 | 30 | 367874.1561 | 415823.307  | 401381.4821 | 422711.4732 | 419856.6423 | 339163.7507 | 375517.8505 | 343841.384  | 372313.4017 | 324548.9781 | 333447.004  | 388257.6828 | 328308.4544  | 385741.0477 | 368614.3515 |
| O70145 | Ncf2     | Neutrophil cytosol factor 2                                                                   | 441.898  | 43.62 | 59485  | 17 | 272852.7932 | 293447.8121 | 291695.8439 | 271442.7579 | 282258.8231 | 253669.4394 | 274534.6966 | 207267.955  | 242946.1965 | 230416.0697 | 239220.2936 | 270720.2982 | 258438.6883  | 254785.4394 | 275038.5711 |
| O70152 | Dpm1     | Dolichol-phosphate mannosyltransferase subunit 1                                              | 34.675   | 7.31  | 29175  | 2  | 11273.38536 | 10398.12308 | 4954.559441 | 2391.239446 | 9495.170911 | 10853.91389 | 12120.02733 | 2702.987935 | 12547.53849 | 11777.22561 | 11796.1053  | 12455.62191 | 12236.67186  | 11582.68622 | 12945.12691 |
| O70172 | Pip4k2a  | Phosphatidylinositol 5-phosphate 4-kinase type-2 alpha                                        | 73.489   | 8.64  | 46152  | 3  |             |             |             |             |             |             |             |             |             |             |             |             |              |             |             |

|        |           |                                                                        |          |       |        |    |              |             |             |             |              |             |             |             |             |             |             |             |             |             |              |
|--------|-----------|------------------------------------------------------------------------|----------|-------|--------|----|--------------|-------------|-------------|-------------|--------------|-------------|-------------|-------------|-------------|-------------|-------------|-------------|-------------|-------------|--------------|
| O70404 | Vamp8     | Vesicle-associated membrane protein 8                                  | 106.163  | 30.69 | 11451  | 3  | 73924.10331  | 76094.55442 | 67899.71704 | 66213.94674 | 77765.77949  | 67654.3628  | 66167.0078  | 30222.46727 | 66962.82538 | 36155.82916 | 73147.56601 | 78179.1632  | 85922.55787 | 69862.97365 | 71924.73711  |
| O70435 | Psma3     | Proteasome subunit alpha type-3                                        | 399.733  | 37.25 | 28405  | 8  | 248671.1349  | 251047.0412 | 251386.0236 | 260080.6593 | 270301.2166  | 234303.372  | 250357.0759 | 246561.4922 | 237976.2753 | 236510.5348 | 267942.7654 | 263204.8122 | 249312.6339 | 265506.8859 | 251204.8263  |
| O70439 | Stx7      | Syntaxin-7                                                             | 430.805  | 44.83 | 29821  | 8  | 139418.6068  | 150411.1169 | 134815.9945 | 138207.6147 | 150125.96    | 115212.2147 | 118960.186  | 117464.7569 | 110002.3089 | 119595.8843 | 130335.0482 | 129243.7451 | 134139.2532 | 129713.7451 | 137594.87    |
| O70454 | Bud31     | Protein BUD31 homolog                                                  | 46.673   | 12.5  | 17000  | 2  | 8439.244737  | 8204.965808 | 7910.225717 | 9907.880298 | 8959.18472   | 7497.221332 | 8842.683645 | 8232.664468 | 8518.339167 | 9058.453049 | 8749.853914 | 9559.051745 | 8880.639518 | 10055.98028 | 8848.973014  |
| O70456 | Sfn       | 14-3-3 protein sigma                                                   | 110.508  | 16.13 | 27706  | 7  | 1000864.467  | 970155.88   | 1005264.322 | 962494.2763 | 1094754.899  | 1078826.96  | 1116554.473 | 1058920.134 | 1064293.517 | 1015722.767 | 998809.1183 | 1069851.898 | 1161584.281 | 1146421.564 | 1105105.9525 |
| O70469 | Dok2      | Docking protein 2                                                      | 60.094   | 4.85  | 45522  | 2  | 15861.97454  | 14814.71565 | 9007.071067 | 13556.33333 | 16696.54014  | 9568.303948 | 13665.97293 | 14224.45279 | 15362.47793 | 14901.3368  | 8800.374845 | 11011.30359 | 8226.91087  | 17061.09261 |              |
| O70480 | Vamp4     | Vesicle-associated membrane protein 4                                  | 107.302  | 31.91 | 16353  | 3  | 8280.583901  | 10684.02021 | 9774.70685  | 8911.383119 | 8869.016598  | 12318.86323 | 9502.279735 | 9538.146331 | 13419.46511 | 14479.07481 | 8734.152485 | 12562.00843 | 13495.29038 | 7588.269882 | 8559.526284  |
| O70492 | Snx3      | Sorting nexin-3                                                        | 216.177  | 62.35 | 18757  | 8  | 162265.2788  | 150729.3887 | 139896.9722 | 133969.4551 | 159117.3795  | 127978.8492 | 127196.754  | 109408.6687 | 118051.0166 | 125767.0736 | 142750.0158 | 142169.7971 | 142782.6068 | 142140.9357 | 144036.6973  |
| O70493 | Snx12     | Sorting nexin-12                                                       | 73.96    | 29.7  | 19116  | 3  | 65089.63614  | 56930.47798 | 65128.95029 | 54853.53559 | 69145.05483  | 59671.38771 | 60454.08505 | 51425.51839 | 55533.8143  | 57765.78777 | 64894.79468 | 59766.93623 | 65483.64192 | 64318.10707 | 66822.04543  |
| O70503 | Hsd17b12  | Very-long-chain 3-oxoacyl-CoA reductase                                | 331.683  | 42.31 | 34742  | 10 | 108287.2335  | 110549.7296 | 103036.0757 | 103533.6803 | 95815.23306  | 115014.5025 | 130016.4046 | 122551.0804 | 125209.4446 | 126746.8133 | 108070.9959 | 114792.9386 | 110179.1832 | 111923.9968 | 109869.1414  |
| O70551 | Srpk1     | SRSF protein kinase 1                                                  | 79.132   | 4.17  | 73088  | 2  | 7204.264582  | 6917.599221 | 7309.867005 | 5992.198499 | 7677.793165  | 6309.574602 | 6330.708392 | 9212.945149 | 9362.817654 | 10618.77388 | 7899.639066 | 6654.244686 | 7446.372043 | 7787.502523 | 8467.17871   |
| O70593 | Sgta      | Small glutamine-rich tetratricopeptide repeat-containing protein alpha | 62.997   | 7.96  | 34157  | 2  | 9543.694503  | 7871.189137 | 8273.677549 | 9583.395188 | 9779.963848  | 5221.67315  | 5115.134665 | 7159.951944 | 6367.37468  | 4494.950753 | 9608.373984 | 8517.726349 | 7749.703534 | 4801.472416 | 6233.453456  |
| O88339 | Epn1      | Epsin-1                                                                | 34.239   | 5.74  | 60158  | 2  | 8999.082312  | 6612.240218 | 6658.101863 | 6585.254794 | 8051.449789  | 5332.413278 | 4794.258023 | 3980.085801 | 5135.080313 | 5652.527877 | 6919.434134 | 7802.488128 | 7040.509209 | 6720.215117 | 7438.836702  |
| O88342 | Wdr1      | WD repeat-containing protein 1                                         | 1015.99  | 62.38 | 66407  | 24 | 1042079.526  | 990616.6915 | 913664.1886 | 969942.313  | 999272.7883  | 849554.3879 | 945796.4149 | 902258.5337 | 874182.5939 | 841086.2192 | 979526.1604 | 967300.5076 | 1018522.426 | 971628.9187 | 876752.3856  |
| O88351 | Ikkb      | Inhibitor of nuclear factor kappa-B kinase subunit beta                | 21.733   | 1.98  | 86690  | 2  | 34230.46616  | 33799.09019 | 35607.76998 | 32919.22942 | 39017.44966  | 43307.62861 | 31532.2145  | 35845.83188 | 39951.33835 | 33430.07269 | 36647.06176 | 33345.06011 | 36177.15303 | 40757.16413 | 35973.17447  |
| O88384 | Vti1b     | Vesicle transport through interaction with t-SNAREs homolog 1B         | 104.755  | 15.09 | 26713  | 3  | 50997.29029  | 59333.04988 | 44845.23782 | 43282.01938 | 48009.96026  | 27326.79331 | 40047.04924 | 36050.27381 | 27519.50887 | 20360.89472 | 44207.41444 | 48131.42992 | 52566.33514 | 47157.86253 | 49475.64647  |
| O88441 | Mtx2      | Metaxin-2                                                              | 93.071   | 28.14 | 29758  | 4  | 28326.06745  | 30792.30207 | 19330.77951 | 23826.69692 | 23335.3691   | 22461.90364 | 24538.53271 | 16852.69074 | 19940.27391 | 17531.21082 | 24691.67153 | 18007.51234 | 24481.28375 | 20376.38919 | 16275.11504  |
| O88447 | Klc1      | Kinesin light chain 1                                                  | 63.553   | 9.98  | 61450  | 3  | 10208.32687  | 10654.13448 | 9292.836384 | 8715.949789 | 3579.096007  | 9640.777578 | 9097.481319 | 3911.669027 | 3801.592475 | 10663.99345 | 10681.49094 | 9721.456804 | 11380.52477 | 10536.81269 | 9373.598611  |
| O88456 | Capns1    | Calpain small subunit 1                                                | 288.071  | 47.58 | 28463  | 9  | 88897.55549  | 84890.64969 | 67609.17956 | 79752.87103 | 79800.68518  | 66372.09062 | 60921.28339 | 66801.15178 | 79990.76459 | 79724.84851 | 89715.81444 | 78652.30921 | 79126.12823 | 84155.73923 | 76522.16682  |
| O88487 | Dync1l2   | Cytoplasmic dynein 1 intermediate chain 2                              | 368.398  | 23.69 | 68394  | 7  | 35961.15344  | 38408.27291 | 27363.04243 | 36327.20006 | 30389.15554  | 21942.7183  | 34007.55257 | 32552.73032 | 38407.07546 | 32386.24624 | 36488.94155 | 39101.22458 | 31961.70633 | 30657.24496 | 35709.05637  |
| O88508 | Dnmt3a    | DNA (cytosine-5)-methyltransferase 3A                                  | 225.665  | 8.15  | 101672 | 5  | 26237.0225   | 27078.08398 | 24269.17385 | 27043.90173 | 20448.1521   | 23827.86873 | 16879.83002 | 28126.32998 | 30019.95735 | 26061.36861 | 25797.80295 | 28540.1057  | 29847.78696 | 26070.00535 | 25734.02651  |
| O88531 | Ppt1      | Palmitoyl-protein thioesterase 1                                       | 424.343  | 35.29 | 34490  | 10 | 464342.7782  | 412613.3338 | 293926.0146 | 355745.0283 | 355686.8947  | 268546.9692 | 297834.9089 | 264191.642  | 266017.6113 | 290526.1038 | 392587.9399 | 294585.3517 | 397748.6495 | 389695.462  | 370713.5791  |
| O88543 | Cops3     | COP9 signalosome complex subunit 3                                     | 188.945  | 25.3  | 47832  | 6  | 56521.44311  | 59963.29405 | 53188.87327 | 50317.48939 | 54262.38822  | 44602.87029 | 53803.83902 | 49548.19714 | 49507.43654 | 49179.38217 | 48990.93118 | 53585.90494 | 47847.75991 | 47542.91995 | 50801.76944  |
| O88544 | Cops4     | COP9 signalosome complex subunit 4                                     | 489.518  | 40.15 | 46285  | 11 | 87980.13812  | 93125.44734 | 83114.05389 | 105251.1529 | 83711.51928  | 79971.5794  | 103585.99   | 109489.4526 | 68912.14152 | 94575.69805 | 106074.2524 | 73748.37816 | 88314.78054 | 67761.56695 | 100744.795   |
| O88545 | Cops6     | COP9 signalosome complex subunit 6                                     | 44.237   | 13.58 | 35880  | 3  | 9800.203978  | 25100.20222 | 22937.59283 | 32022.81594 | 4562.387336  | 26246.75338 | 6714.492792 | 22559.74497 | 27531.59527 | 25412.90694 | 26233.05196 | 9904.160088 | 22691.24252 | 21930.08843 | 24561.42937  |
| O88569 | Hnrnpa2b1 | Heterogeneous nuclear ribonucleoproteins A2/B1                         | 1252.754 | 68.84 | 37403  | 26 | 1444429.324  | 1382914.526 | 1552060.383 | 1535065.646 | 1442598.841  | 1043050.213 | 1272160.164 | 1172549.881 | 1171723.816 | 1268102.8   | 1373371.619 | 1318469.403 | 1372729.858 | 1482031.747 | 1247509.879  |
| O88587 | Comt      | Catechol O-methyltransferase                                           | 81.166   | 8.68  | 29486  | 2  | 13788.99151  | 10797.15962 | 9357.995343 | 11641.82647 | 9690.489024  | 7145.613068 | 8909.978198 | 9813.044176 | 9848.914909 | 8414.097332 | 8196.05513  | 7251.183362 | 10091.46883 | 7317.304334 | 9525.201293  |
| O88668 | Creg1     | Protein CREG1                                                          | 88.14    | 13.18 | 24452  | 2  | 37496.59893  | 93238.04006 | 42547.07117 | 46024.02805 | 37987.32526  | 34541.81618 | 43085.22459 | 35652.64485 | 34474.83928 | 33524.51282 | 37597.48898 | 39780.89194 | 40585.75559 | 39645.77708 | 40919.24255  |
| O88685 | Psmc3     | 26S proteasome regulatory subunit 6A                                   | 481.329  | 48.42 | 49549  | 14 | 128408.52737 | 131106.9604 | 101792.6825 | 137397.1643 | 111242.95954 | 134610.9897 | 121133.5174 | 106165.1901 | 139370.7753 | 107969.1327 | 136363.0566 | 126359.5351 | 99505.39375 | 116829.3973 | 110922.2881  |
| O88696 | Clpp      | ATP-dependent Clp protease proteolytic subunit, mitochondrial          | 52.788   | 12.13 | 29800  | 2  | 18264.06446  | 19334.84714 | 16587.53921 | 17333.14857 | 15925.08649  | 18122.53504 | 17322.56295 | 16054.27541 | 19714.29645 | 16896.28413 | 21998.89454 | 19836.0215  | 20682.84681 | 21924.81179 | 14725.32751  |
| O88712 | Ctbp1     | C-terminal-binding protein 1                                           | 152.517  | 23.13 | 47745  | 8  | 155295.4011  | 161167.6701 | 152572.5891 | 162515.3956 | 162535.7916  | 152827.3519 | 144557.3132 | 159661.8208 | 162459.2035 | 162818.279  | 147891.904  | 161040.271  | 157802.3067 | 158170.8687 | 159870.9883  |
| O88736 | Hsd17b7   | 3-keto-steroid reductase                                               | 103.985  | 8.68  | 37317  | 2  | 4175.086264  | 7745.688958 | 7740.73759  | 4629.957432 | 5303.776484  | 11023.07449 | 9465.117743 | 9734.436063 | 8451.943977 | 5065.11556  | 8393.190429 | 7474.097038 | 7170.868909 | 8298.281979 | 7661.267801  |
| O88738 | Birc6     | Baculoviral IAP repeat-containing protein 6                            | 275.402  | 3.17  | 532170 | 10 | 27508.57537  | 33278.24015 | 26585.23579 | 32542.22827 | 32637.95893  | 30520.0495  | 25682.39193 | 29654.1333  | 29494.1569  | 28432.85805 | 28388.7907  | 29523.10185 | 30757.50681 | 26161.50253 | 33108.44934  |
| O88746 | Tom1      | Target of Myb protein 1                                                | 200.291  | 21.14 | 54325  | 6  | 53758.54612  | 50371.16756 | 45729.70769 | 45190.67737 | 44769.83448  | 38261.1141  | 44724.01528 | 42062.7481  | 39824.14862 | 42591.71723 | 49068.59524 | 50363.1774  | 52532.53912 | 46538.71815 | 45997.10032  |
| O88763 | Pik3c3    | Phosphatidylinositol 3-kinase catalytic subunit type 3                 | 28.945   | 4.4   | 101534 | 2  | 4091.985346  | 3258.698091 | 3605.62634  | 3362.409476 | 4143.992536  | 3793.035424 | 4484.086704 | 4263.715597 | 4983.224644 | 3740.535727 | 3923.807727 | 4826.250603 | 3765.196209 | 4165.427761 | 4475.161558  |
| O88796 | Rpp30     | Ribonuclease P protein subunit p30                                     | 55.805   | 7.09  | 29473  | 2  | 6794.182794  | 6232.645253 | 6305.649439 | 6854.423247 | 4510.32999   | 3389.483727 | 6026.433531 | 4757.096146 | 5197.790433 | 6245.065602 | 5117.572957 | 5830.37657  | 5683.835792 | 5441.293082 | 6447.467961  |
| O88829 | St3gal5   | Lactosylceramide alpha-2,3-sialyltransferase                           | 33.56    | 8.94  | 47360  | 2  | 2856.977962  | 6418.272801 | 5055.114313 | 7701.179232 | 6959.29528   | 6658.982339 | 4621.450018 | 7566.892543 | 7126.653206 | 4957.588351 | 5906.041738 | 5902.232677 | 6012.329646 | 5635.6628   | 5656.181402  |
| O88838 | Spsb2     | SPRY domain-containing SOCS box protein 2                              | 11.784   | 6.82  | 28938  | 2  | 13173.18656  | 36502.45718 | 14860.73434 | 11992.9972  | 25471.34764  | 32178.13915 | 16607.16954 | 26583.40963 | 11774.07104 | 12170.08947 | 36619.65163 | 39554.85241 | 43787.31181 | 35970.13334 | 32097.97459  |
| O88844 | Idh1      | Isocitrate dehydrogenase [NADP] cytoplasmic                            | 570.313  | 39.13 | 46674  | 14 | 435753.6963  | 449509.8155 | 443980.8911 | 467251.3416 | 445680.0453  | 350899.3754 | 379597.6876 | 393642.4518 | 360151.7386 | 384121.6493 | 421457.4037 | 439981.1641 | 454785.5425 | 444800.9572 | 457500.51    |
| O88879 | Apaf1     | Apoptotic protease-activating factor 1                                 | 113.035  | 4.08  | 141003 | 4  | 7384.271195  | 5765.625889 | 5448.2953   |             |              |             |             |             |             |             |             |             |             |             |              |

|        |        |                                                          |          |       |        |    |             |             |             |             |             |             |             |              |             |             |             |              |              |             |             |
|--------|--------|----------------------------------------------------------|----------|-------|--------|----|-------------|-------------|-------------|-------------|-------------|-------------|-------------|--------------|-------------|-------------|-------------|--------------|--------------|-------------|-------------|
| O89079 | Cope   | Coatomer subunit epsilon                                 | 352.186  | 48.05 | 34567  | 7  | 40865.39019 | 45602.86027 | 41692.20567 | 43608.51067 | 41807.96231 | 39929.41526 | 47103.76999 | 38362.85605  | 35553.7649  | 31967.0766  | 30042.22156 | 34151.87414  | 34716.94067  | 42001.92102 | 30749.69587 |
| O89086 | Rbm3   | RNA-binding protein 3                                    | 157.678  | 43.79 | 16605  | 5  | 34115.66148 | 21466.81123 | 31757.82255 | 25418.9931  | 27797.7757  | 11194.52054 | 21558.06332 | 20206.55554  | 21587.29392 | 17419.24133 | 33140.03124 | 29755.33195  | 31878.68801  | 26481.2261  | 25495.12825 |
| O89110 | Casp8  | Caspase-8                                                | 162.529  | 13.54 | 55357  | 5  | 20542.86629 | 23378.04354 | 22695.13273 | 21687.72271 | 20726.29619 | 15334.25588 | 17753.41973 | 17587.40934  | 22395.53053 | 13482.23364 | 21991.59845 | 24197.08453  | 25457.15677  | 23680.4026  | 17766.11757 |
| O89112 | Lanc1  | LaNC-like protein 1                                      | 225.478  | 17.54 | 45341  | 5  | 33944.59895 | 31724.16751 | 22426.91739 | 30714.90192 | 31143.45444 | 28405.44287 | 27413.95208 | 28975.63188  | 26136.94586 | 21637.91435 | 30223.47524 | 31712.89205  | 31053.96888  | 20792.29929 | 29855.02209 |
| P00173 | Cyb5a  | Cytochrome b5                                            | 126.291  | 41.04 | 15355  | 4  | 38399.46802 | 39871.53606 | 44536.76938 | 43419.62262 | 41001.28061 | 49514.14919 | 50506.50008 | 49360.55076  | 48231.13786 | 43164.26548 | 45863.62534 | 47028.5532   | 40221.4238   | 42280.5568  | 42557.33321 |
| P00375 | Dhfr   | Dihydrofolate reductase                                  | 163.632  | 36.9  | 21606  | 6  | 45017.97434 | 45807.45765 | 51379.74937 | 52764.80756 | 51303.16112 | 45170.11876 | 49220.70904 | 45842.64987  | 45866.83895 | 42625.30408 | 48580.53556 | 51517.00065  | 52598.76735  | 52617.45184 | 45287.49984 |
| P00405 | Mitco2 | Cytochrome c oxidase subunit 2                           | 186.311  | 40.53 | 25976  | 7  | 59725.16472 | 61000.87261 | 47389.47359 | 64785.47398 | 52546.83812 | 46857.37524 | 36426.22658 | 29939.75488  | 48920.048   | 47772.81039 | 57435.01422 | 50540.96303  | 673671.49027 | 57784.57074 | 55693.43497 |
| P00493 | Hprt1  | Hypoxanthine-guanine phosphoribosyltransferase           | 409.853  | 59.17 | 24570  | 10 | 264238.4545 | 281765.5738 | 257625.4234 | 278590.441  | 253299.6839 | 198596.285  | 226359.5206 | 192174.5653  | 224206.966  | 212015.3771 | 257247.5432 | 250923.9561  | 256867.99    | 253840.6565 | 253415.8221 |
| P00564 | Ckm    | Creatine kinase M-type                                   | 53.894   | 8.4   | 43045  | 2  | 14311.66201 | 10115.37759 | 14627.07685 | 12532.85651 | 11080.81993 | 9240.513258 | 22480.8509  | 14879.19257  | 16690.02409 | 11916.1826  | 11138.50149 | 9373.943785  | 14418.01648  | 6963.493638 | 11187.79822 |
| P01896 |        | H-2 class I histocompatibility antigen, K-B alpha chain  | 107.51   | 27.03 | 20454  | 4  | 234761.1423 | 219046.2103 | 183925.0276 | 184713.8135 | 214137.3833 | 271808.159  | 238268.4878 | 231869.4739  | 245384.3098 | 267354.8661 | 244194.4944 | 219907.2245  | 221987.0805  | 221630.0375 | 215660.2053 |
| P01899 | H2-D1  | H-2 class I histocompatibility antigen, D-B alpha chain  | 255.44   | 28.45 | 40836  | 9  | 300775.9532 | 284979.3282 | 251421.5146 | 261122.1298 | 301392.8648 | 409545.3946 | 339294.5896 | 348631.206   | 354408.9881 | 381423.5122 | 318627.9751 | 301800.14    | 328544.482   | 320679.3887 | 307593.9218 |
| P01900 | H2-D1  | H-2 class I histocompatibility antigen, D-D alpha chain  | 393.694  | 33.42 | 41110  | 12 | 412785.8667 | 406011.3751 | 343379.5825 | 361209.6487 | 404193.9307 | 536442.4828 | 465331.6614 | 457999.4238  | 477901.8306 | 516405.7042 | 431334.6428 | 410374.6865  | 442112.1469  | 433472.7541 | 409039.2468 |
| P01901 | H2-K1  | H-2 class I histocompatibility antigen, K-B alpha chain  | 85.959   | 9.21  | 41302  | 4  | 265491.2925 | 254753.8349 | 209802.7873 | 225566.2379 | 256081.2115 | 353265.3206 | 303017.7611 | 295496.9399  | 309536.7509 | 335949.6196 | 273590.6125 | 259015.568   | 278401.801   | 277092.7743 | 265869.4366 |
| P01902 | H2-K1  | H-2 class I histocompatibility antigen, K-D alpha chain  | 345.838  | 33.15 | 41490  | 11 | 254578.7954 | 265347.2366 | 217114.3162 | 251806.3795 | 268494.895  | 377330.4916 | 336294.5279 | 351074.0111  | 358607.3609 | 373527.3853 | 277370.2095 | 274321.9863  | 311233.1282  | 295762.4634 | 305857.2052 |
| P02262 |        | Histone H2A type 1                                       | 466.815  | 63.85 | 14077  | 10 | 16091889.14 | 15232084.62 | 16100043.78 | 15574715.09 | 16314933.9  | 18270634.73 | 16674355.2  | 17090545.68  | 16795951.11 | 18297070.8  | 15805338.62 | 14870157.42  | 16645788.465 | 1624506.04  | 17301139.19 |
| P02301 | H3f3c  | Histone H3.3C                                            | 244.642  | 55.15 | 15315  | 11 | 17617614.52 | 18038387.95 | 19065016.32 | 19836384.03 | 19172892.84 | 20973416.41 | 18439241    | 18768337.85  | 18742133.49 | 21255499.23 | 19356494.77 | 18469476.64  | 19522586.6   | 19934927.39 | 19107943.52 |
| P03921 | Mtnd5  | NADH-ubiquinone oxidoreductase chain 5                   | 87.885   | 5.44  | 68475  | 2  | 6429.509349 | 5411.68642  | 3126.483128 | 5310.962639 | 4674.814879 | 3722.082802 | 4775.451296 | 4644.501238  | 4745.786817 | 4540.858777 | 4421.922659 | 4051.729878  | 4623.348253  | 3696.442064 | 4240.166655 |
| P03975 | lap    | IgE-binding protein                                      | 126.577  | 10.95 | 62747  | 4  | 24203.09605 | 29154.53806 | 22579.52304 | 25818.56892 | 17660.80941 | 20632.44429 | 24046.22374 | 29251.66147  | 24081.45451 | 16095.39124 | 15345.66116 | 16306.43967  | 15077.82016  | 16613.39742 | 24385.05623 |
| P04256 | Hnmpa1 | Heterogeneous nuclear ribonucleoprotein A1               | 841.217  | 49.38 | 34212  | 18 | 485966.3587 | 500638.0376 | 488821.9778 | 470920.8469 | 517809.4488 | 404888.1041 | 465222.6985 | 483711.6092  | 420676.1185 | 395341.9353 | 475094.3624 | 488564.1296  | 468279.4252  | 432524.5774 | 419998.3712 |
| P04441 | Cd74   | H-2 class II histocompatibility antigen gamma chain      | 251.246  | 21.51 | 31557  | 6  | 139862.8289 | 150396.7936 | 143464.884  | 147093.0201 | 143189.0032 | 156834.2298 | 150511.0189 | 152378.939   | 168625.1504 | 163172.8225 | 153383.8437 | 147949.3969  | 160612.9349  | 159372.2588 | 148246.1242 |
| P04550 | Ptms   | Parathyroid hormone                                      | 83.296   | 11.76 | 11559  | 2  | 25172.9563  | 13430.02599 | 13686.83488 | 4310.81105  | 22082.22769 | 18632.31313 | 11174.54406 | 12670.87259  | 13003.34801 | 10993.58982 | 19491.13494 | 12902.72632  | 26151.73641  | 10396.27376 | 9597.513789 |
| P04692 | Tpm1   | Tropomyosin alpha-1 chain                                | 138.598  | 21.83 | 32681  | 8  | 540462.6714 | 367698.0295 | 484858.2062 | 489067.8564 | 452743.7177 | 431545.7687 | 479785.501  | 438887.4605  | 505052.4276 | 495470.1533 | 486163.6948 | 434966.1424  | 398877.6103  | 516333.7786 | 493861.9256 |
| P05063 | Aldoc  | Fructose-bisphosphate aldolase C                         | 1174.329 | 80.17 | 39395  | 30 | 4006973.451 | 3753982.921 | 3749252.864 | 3828756.465 | 3827635.73  | 3073012.677 | 3405920.574 | 3113646.204  | 2907326.7   | 3133873.848 | 3521674.326 | 3389887.271  | 343421.045   | 3513232.917 | 3346338.001 |
| P05064 | Aldoa  | Fructose-bisphosphate aldolase A                         | 1657.605 | 92.31 | 39356  | 40 | 11928239.94 | 11788232.62 | 10950522.98 | 11133586    | 11665209.7  | 9688244.775 | 10210130.93 | 9959441.037  | 9489874.479 | 9800521.261 | 10707215.97 | 10237847.86  | 10697867.2   | 10444974.65 | 10611272.01 |
| P05132 | Prkaca | cAMP-dependent protein kinase catalytic subunit alpha    | 253.713  | 25.64 | 40571  | 8  | 108286.2957 | 108371.2774 | 108729.6728 | 109683.3914 | 117022.0712 | 113733.3063 | 118483.2015 | 121446.7815  | 123715.2372 | 109288.5771 | 110887.9111 | 110309.0922  | 121389.2586  | 120975.7564 | 112518.5693 |
| P05201 | Got1   | Aspartate aminotransferase, cytoplasmic                  | 819.476  | 50.12 | 46248  | 17 | 637248.468  | 673636.3433 | 607158.7499 | 649143.4908 | 634328.7019 | 580784.7998 | 668473.8897 | 616085.4066  | 611535.5346 | 580988.9501 | 636615.3826 | 600209.6328  | 664549.5304  | 645313.4091 | 661377.9689 |
| P05202 | Got2   | Aspartate aminotransferase, mitochondrial                | 943.827  | 66.98 | 47411  | 25 | 1338992.713 | 1429739.552 | 1262160.363 | 1294326.963 | 1417763.704 | 1461399.442 | 1347146.224 | 13958827.212 | 1401597.105 | 1367917.141 | 1258891.263 | 1262041.561  | 1328076.605  | 1329357.101 | 1353072.081 |
| P05213 | Tuba1b | Tubulin alpha-1B chain                                   | 1739.652 | 89.36 | 50152  | 39 | 5904946.168 | 6474169.108 | 6611794.927 | 6825657.136 | 6462916.143 | 5966887.102 | 6497842.556 | 5471556.717  | 6445999.333 | 6419215.471 | 5951809.555 | 6630710.209  | 6645788.465  | 6624506.04  | 6818078.475 |
| P05555 | Iltgam | Integrin alpha-M CD11b                                   | 968.769  | 29.31 | 127481 | 23 | 483369.6008 | 513416.7657 | 492420.1077 | 478056.8826 | 514439.6259 | 438091.6154 | 445175.5435 | 435078.3488  | 435179.5178 | 451248.3582 | 455189.4161 | 449687.1784  | 476731.8719  | 490871.4116 | 455009.037  |
| P05708 | Hk1    | Hexokinase-1                                             | 866.042  | 31.92 | 102408 | 27 | 648657.2763 | 685724.532  | 629981.1824 | 663173.0783 | 722764.9283 | 641209.8799 | 622903.97   | 638992.1231  | 681254.2603 | 639638.7454 | 643070.2858 | 650379.5576  | 657277.847   | 710833.6628 | 673918.5073 |
| P05712 | Rab2a  | Ras-related protein Rab-2A                               | 311.354  | 52.36 | 23536  | 9  | 10247.8067  | 116447.0677 | 115780.2019 | 113742.5219 | 112670.9065 | 110368.3023 | 106521.6544 | 118954.305   | 107145.4007 | 116685.5699 | 104543.9278 | 106232.6096  | 108317.8951  | 109743.5446 | 111327.2768 |
| P05765 | Rps21  | 40S ribosomal protein S21                                | 71.433   | 28.92 | 9127   | 3  | 20668.30006 | 21905.69036 | 15481.92452 | 12171.64801 | 20845.83947 | 15002.73028 | 16759.36602 | 15472.96636  | 10744.56689 | 16449.0755  | 23507.7749  | 126539.46047 | 19204.35423  | 17731.28679 | 16554.7388  |
| P06151 | Ldha   | L-lactate dehydrogenase A chain                          | 1682.741 | 84.64 | 36499  | 35 | 8217265.576 | 8792004.974 | 8585379.425 | 8550950.978 | 8893594.46  | 7565543.398 | 8029616.434 | 7931280.684  | 7533344.073 | 7711121.431 | 7256506.959 | 8102216.036  | 8157885.436  | 8354161.324 | 8123125.622 |
| P06339 | H2-T23 | H-2 class I histocompatibility antigen, D-37 alpha chain | 147.539  | 8.68  | 40875  | 3  | 115638.5418 | 110479.8982 | 94251.9551  | 102794.9388 | 117511.9473 | 174669.4312 | 150703.3711 | 153362.0377  | 150847.6849 | 166653.2674 | 125052.4844 | 116537.7369  | 148204.5896  | 130256.0568 | 119216.4647 |
| P06685 | Atp1a1 | Sodium/potassium-transporting ATPase subunit alpha-1     | 1379.998 | 33.24 | 113054 | 29 | 1070626.094 | 1144754.816 | 968789.224  | 1028690.275 | 1059259.714 | 1091179.973 | 1051726.466 | 1030060.946  | 1099545.976 | 1067758.664 | 1116839.62  | 1081040.388  | 1147860.535  | 1104696.865 | 1140510.977 |
| P06745 | Gpi    | Glucose-6-phosphate isomerase                            | 1529.065 | 69.53 | 62767  | 39 | 2059905.701 | 2041316.466 | 2029275.345 | 2102741.554 | 2079254.341 | 1748598.982 | 1868822.231 | 1859687.61   | 1824612.314 | 1811778.163 | 2014666.341 | 1962044.924  | 2025673.602  | 2010582.123 | 1850950.606 |
| P06761 | Hspa5  | Endoplasmic reticulum chaperone BiP                      | 1805.756 | 54.59 | 72347  | 39 | 4095761.539 | 3799424.207 | 4227951.981 | 3726789.64  | 3603341.846 | 4616002.48  | 5060551.693 | 5276284.285  | 4355010.024 | 4678664.729 | 4129526.965 | 3886069.767  | 4109104.964  | 4365993.821 | 3906113.136 |
| P06800 | Ptpcr  | Receptor-type tyrosine-protein phosphatase C             | 1161.594 | 32.25 | 144837 | 33 | 698054.3799 | 748973.4915 | 620899.4394 | 723468.9027 | 707437.1824 | 633142.9665 | 651798.6091 | 624290.1343  | 640504.1013 | 672197.0652 | 666874.238  | 640184.8914  | 729892.6017  | 645171.3371 | 719376.3687 |
| P07091 | S100a4 | Protein S100-A4                                          | 293.402  | 51.49 | 11721  | 8  | 1380613.363 | 1021022.695 | 1319901.539 | 1216087.324 | 1013109.836 | 931273.3532 | 876619.5715 | 820435.7958  | 924493.7569 | 931754.4404 | 1393770.648 | 1274459.144  | 1100906.11   | 1005796.262 | 895379.4581 |
| P07356 | Anxa2  | Annexin A2                                               | 1133.734 | 71.98 | 38676  | 29 | 3914881.141 | 4078368.447 |             |             |             |             |             |              |             |             |             |              |              |             |             |

|         |            |                                                                   |          |       |        |    |             |             |             |             |             |             |             |             |             |             |             |             |             |              |             |
|---------|------------|-------------------------------------------------------------------|----------|-------|--------|----|-------------|-------------|-------------|-------------|-------------|-------------|-------------|-------------|-------------|-------------|-------------|-------------|-------------|--------------|-------------|
| P08775  | Polr2a     | DNA-directed RNA polymerase II subunit RPB1                       | 350.364  | 7.41  | 217176 | 10 | 67225.97018 | 68831.88263 | 67329.82098 | 73785.90797 | 65737.21064 | 58469.41884 | 56376.2361  | 58969.61994 | 53815.21835 | 59508.84079 | 54754.77959 | 64481.17866 | 52162.53424 | 60263.34213  | 65129.0342  |
| P08905  | Lyz2       | Lysozyme C-2                                                      | 74.868   | 16.22 | 16689  | 2  | 39325.11995 | 13085.21103 | 27255.24751 | 31909.88297 | 32612.46289 | 38409.49008 | 54998.59094 | 43681.36846 | 44790.33605 | 34711.9209  | 43283.55256 | 46010.10732 | 34826.85746 | 38023.57749  | 34333.10512 |
| P09056  | Itgb1      | Integrin beta-1                                                   | 467.858  | 21.55 | 88231  | 13 | 162465.2775 | 166235.139  | 147856.8778 | 160350.7034 | 155741.768  | 158808.8364 | 155111.6652 | 144306.0999 | 153334.3372 | 154473.3551 | 130795.3437 | 130380.2828 | 146139.5344 | 148091.7534  | 153215.7008 |
| P09103  | P4hb       | Protein disulfide-isomerase                                       | 1539.052 | 66.6  | 57058  | 38 | 3149509.482 | 3124158.322 | 3130231.795 | 3166294.926 | 3116742.237 | 4472751.723 | 4095885.341 | 4037445.936 | 4271935.096 | 4018740.471 | 3274469.996 | 3337629.635 | 3314583.428 | 3446869.385  | 3133910.671 |
| P09330  | Prps2      | Ribose-phosphate pyrophosphokinase 2                              | 365.808  | 30.19 | 34813  | 9  | 103237.7608 | 101587.3443 | 108403.4921 | 120495.0587 | 109634.3605 | 104403.2624 | 104673.9893 | 107501.2314 | 115980.2866 | 122539.6456 | 97034.46068 | 114130.19   | 105680.6476 | 109431.4853  | 104665.9226 |
| P09405  | Ncl        | Nucleolin                                                         | 1046.262 | 36.35 | 76723  | 29 | 2539139.093 | 2502691.099 | 2540729.357 | 2594511.685 | 2565329.035 | 2315674.772 | 2727556.458 | 2784384.179 | 2511331.298 | 2429433.099 | 2508072.225 | 2655998.829 | 2571673.211 | 2628877.55   | 2683720.564 |
| P09411  | Pgk1       | Phosphoglycerate kinase 1                                         | 2028.486 | 82.97 | 44550  | 48 | 8829100.648 | 8700622.921 | 8504147.384 | 8855084.731 | 8216684.888 | 8527302.509 | 8263255.096 | 7769414.168 | 8309214.286 | 7817266.91  | 8384398.878 | 8054228.452 | 8011241.567 | 8315448.129  | 7954646.35  |
| P09527  | Rab7a      | Ras-related protein Rab-7a                                        | 710.488  | 74.88 | 23504  | 17 | 762887.4449 | 751813.2693 | 739696.3013 | 703704.2206 | 756792.2294 | 678752.9796 | 686777.4401 | 684488.2249 | 720469.5392 | 684392.2824 | 710076.759  | 750621.8073 | 748692.1579 | 770192.7709  | 740368.7277 |
| P09528  | Fth1       | Ferritin heavy chain                                              | 222.436  | 41.21 | 21067  | 6  | 121468.2824 | 139999.4249 | 142364.3108 | 136725.922  | 146750.2989 | 307375.1546 | 283079.816  | 266604.0082 | 279662.0026 | 218345.1032 | 169146.7018 | 193189.5279 | 167126.7122 | 172174.1946  | 182225.5453 |
| P09581  | Csf1r      | Macrophage colony-stimulating factor 1 receptor                   | 258.036  | 13    | 109179 | 11 | 128403.6754 | 143937.2201 | 126039.4629 | 128494.5906 | 141602.1567 | 92418.38924 | 96309.23175 | 95294.10769 | 91506.99355 | 98086.27993 | 124556.8812 | 120639.4346 | 134892.6852 | 111759.7685  | 126589.1444 |
| P09671  | Sod2       | Superoxide dismutase [Mn], mitochondrial                          | 338.067  | 51.35 | 24603  | 8  | 164062.3876 | 164225.2152 | 143801.2023 | 137839.7251 | 138823.3072 | 194138.746  | 208178.5658 | 220371.9431 | 206391.462  | 168515.5761 | 150325.2382 | 147256.7959 | 154223.6273 | 144534.1272  | 147195.9613 |
| P09895  | Rpl5       | 60S ribosomal protein L5                                          | 265.395  | 31.65 | 34459  | 10 | 269234.4396 | 265367.6248 | 285121.9042 | 233051.3442 | 263201.8853 | 225296.2712 | 368384.2111 | 320393.2106 | 318513.499  | 223172.0193 | 278873.989  | 295418.3206 | 167234.1688 | 272775.2176  | 262567.8205 |
| POC0A1  | Vps25      | Vacuolar protein-sorting-associated protein 25                    | 70.109   | 18.75 | 20762  | 3  | 9988.27857  | 15778.92554 | 33800.50051 | 36361.50458 | 15175.51154 | 18430.01726 | 6413.609872 | 17345.17742 | 9055.648111 | 32308.7394  | 34138.64638 | 33329.81691 | 34515.10644 | 41182.26915  | 13803.79047 |
| POC0R5  | Pik3r4     | Phosphoinositide 3-kinase regulatory subunit 4                    | 85.965   | 3.46  | 152447 | 3  | 10832.12474 | 12414.55615 | 12664.84209 | 11414.71326 | 10533.03423 | 10851.62481 | 10377.58663 | 11352.97896 | 11897.93035 | 10533.7853  | 11884.03357 | 11167.8512  | 10680.0142  | 11900.81049  | 12190.13356 |
| POC0S6  | H2afz      | Histone H2A.Z                                                     | 301.957  | 53.91 | 13553  | 6  | 13696408.72 | 12798786.28 | 13878419.94 | 13354976.97 | 14412748.41 | 16271450.93 | 14491249.3  | 14768626.39 | 14491136.89 | 15818692.53 | 13653452.23 | 13202000.81 | 14276762.65 | 13708250.03  | 14755555.37 |
| POC5H9  | Manf       | Mesencephalic astrocyte-derived neurotrophic factor               | 71.399   | 24.58 | 20388  | 3  | 23731.92446 | 19659.14432 | 20132.06257 | 15725.95508 | 22381.18314 | 15787.147   | 25690.88613 | 24849.20468 | 23611.42586 | 21291.82593 | 16375.71165 | 15155.85047 | 21632.42232 | 22137.72601  | 21365.9147  |
| POC7N9  | Psmg4      | Proteasome assembly chaperone 4                                   | 41.763   | 22.76 | 13974  | 2  | 5934.791938 | 6829.138354 | 5706.056276 | 6978.448667 | 4855.974114 | 3530.214664 | 5834.514349 | 3734.005207 | 6270.359825 | 5083.782936 | 5431.354203 | 5947.876232 | 5240.557322 | 7052.160392  | 6192.447549 |
| POCC09  | Hist2h2aa3 | Histone H2A type 2-A                                              | 539.504  | 63.85 | 14095  | 11 | 16594916.52 | 15622893.81 | 16174435.98 | 15922750.99 | 16558365.43 | 18273188.15 | 16796799.9  | 17243684.01 | 16998064.22 | 18335364.74 | 16057336.56 | 15179166.25 | 16884687.36 | 13701470.51  | 17397126.76 |
| POCG49  | Ubb        | Polyubiquitin-B                                                   | 202.537  | 56.07 | 34369  | 6  | 1610577.211 | 1615007.605 | 1710586.751 | 1581392.485 | 1435783.541 | 1488857.329 | 1697072.343 | 1532412.889 | 1509388.456 | 1533816.552 | 1715221.557 | 1463096.299 | 1508059.47  | 1556813.539  | 1500721.26  |
| PDDV2   | Ifi204     | Interferon-activable protein 204                                  | 98.075   | 10.99 | 69438  | 5  | 35404.79815 | 36719.13552 | 30485.70229 | 35468.67013 | 44162.22359 | 39480.25542 | 40990.69802 | 35976.71776 | 42355.03213 | 38142.07216 | 27184.15701 | 37538.29397 | 42919.73986 | 46845.15084  | 37855.44359 |
| PDDP2   | Calm1      | Calmodulin-1                                                      | 247.581  | 60.4  | 16838  | 6  | 121159.8771 | 114690.621  | 66994.51555 | 123069.1124 | 117272.0721 | 88270.19173 | 111763.4582 | 93131.63353 | 120327.6355 | 86240.57111 | 150799.9127 | 135815.9461 | 143977.8841 | 104046.90294 | 74852.79728 |
| P10107  | Anxa1      | Annexin A1                                                        | 1203.964 | 71.1  | 38734  | 27 | 1239134.742 | 1235226.355 | 1113844.756 | 1141203.282 | 1065915.449 | 1171545.865 | 1102419.027 | 1154005.148 | 1158600.388 | 1082946.021 | 1197693.275 | 1170649.026 | 1213033.041 | 1204045.547  | 1214181.413 |
| P10126  | Eef1a1     | Elongation factor 1-alpha                                         | 1368.036 | 67.53 | 50114  | 40 | 14777322.33 | 15271049.09 | 15477283.86 | 15327406.97 | 14750610.17 | 17100977.89 | 16285461.64 | 17192873.71 | 16407405.06 | 15777184.7  | 15579185.02 | 16099263.52 | 15350929.54 | 14959460.84  | 15770801.93 |
| P10404  |            | MLV-related proviral Env polyprotein                              | 68.924   | 3.28  | 69613  | 2  | 20497.5145  | 21628.00601 | 22870.68818 | 20090.12333 | 5563.862273 | 13113.2579  | 23645.6485  | 24467.08505 | 9583.069039 | 23641.22052 | 17271.0711  | 18159.74167 | 18897.36306 | 20973.33145  | 19989.96546 |
| P10518  | Alad       | Delta-aminolevulinic acid dehydratase                             | 122.125  | 25.15 | 36024  | 4  | 22405.08855 | 21118.57522 | 19959.60972 | 20980.01157 | 21262.93641 | 19477.48259 | 19968.43499 | 19119.27789 | 21188.48476 | 15671.29314 | 22737.06313 | 23361.33514 | 22603.82861 | 19927.43665  | 6686.24381  |
| P10605  | Ctsb       | Cathepsin B                                                       | 1041.968 | 69.32 | 37280  | 22 | 891880.3315 | 884936.409  | 708097.6605 | 789889.9238 | 799651.9644 | 602047.0464 | 608949.3052 | 599163.9332 | 623961.703  | 561251.8964 | 707292.8262 | 751564.6213 | 729519.4473 | 815184.5973  | 758539.5724 |
| P10639  | Txn        | Thioredoxin                                                       | 141.27   | 34.29 | 11675  | 4  | 390853.8644 | 294971.1851 | 352268.4643 | 334582.8901 | 319369.9508 | 324094.47   | 356393.5958 | 303167.2927 | 322863.9533 | 319149.0276 | 146396.8809 | 369370.7883 | 325758.326  | 339604.8907  | 275852.7039 |
| P10649  | Gstm1      | Glutathione S-transferase Mu 1                                    | 172.837  | 32.57 | 25970  | 6  | 80192.77004 | 115674.151  | 104459.6818 | 82813.48842 | 98427.3602  | 77315.73237 | 73462.55422 | 73259.43375 | 78725.99648 | 87493.16819 | 107737.1016 | 107732.9767 | 75847.83066 | 81240.56723  | 86474.60759 |
| P10711  | Tcea1      | Transcription elongation factor A protein 1                       | 175.251  | 20.93 | 33880  | 4  | 21691.99485 | 23008.87854 | 21195.57566 | 19742.04097 | 21796.2021  | 6086.037908 | 18255.45466 | 5711.095988 | 17508.84725 | 15613.23378 | 7771.933314 | 19470.24811 | 6493.548898 | 6804.142495  | 7592.666975 |
| P10810  | Cd14       | Monocyte differentiation antigen CD14                             | 612.498  | 50.55 | 39204  | 14 | 312606.6409 | 297975.4001 | 273550.8263 | 288584.3026 | 290226.1853 | 313357.5551 | 325549.9477 | 303191.0662 | 335513.5435 | 354086.8123 | 291379.4467 | 273624.2408 | 309551.1665 | 296560.5028  | 349592.9581 |
| P10852  | Slc3a2     | 4F2 cell-surface antigen heavy chain                              | 727.33   | 46.58 | 58337  | 19 | 668401.5999 | 661311.6021 | 547358.4108 | 620283.7152 | 616898.1215 | 604427.1534 | 651725.7531 | 625579.3439 | 644469.2889 | 641201.8427 | 680422.3508 | 645496.7343 | 692883.99   | 660976.5118  | 666502.6454 |
| P10853  | Hist1h2bf  | Histone H2B type 1-F/J/L                                          | 656.022  | 61.11 | 13936  | 15 | 14768653.22 | 13656565.05 | 13749574.4  | 8090721.226 | 15931577.91 | 15402620.44 | 11711306.28 | 13749871.51 | 12937014.59 | 14303050.48 | 15935824.02 | 14420528.14 | 7532344.915 | 7166764.013  | 13936174.71 |
| P10854  | Hist1h2bm  | Histone H2B type 1-M                                              | 661.54   | 61.11 | 13936  | 15 | 14780585.49 | 13643805.02 | 13754024.74 | 8094255.842 | 15911415.03 | 15406088.59 | 11713037.04 | 13759850.14 | 12946048.71 | 14309976.13 | 15944194.36 | 14408511.83 | 7546320.387 | 7169908.967  | 13942298.8  |
| P11030  | Dbi        | Acyl-CoA-binding protein                                          | 123.494  | 39.08 | 10027  | 2  | 22916.11056 | 16520.02526 | 14984.54633 | 16354.18714 | 14107.62249 | 11350.81429 | 11633.04981 | 10513.01043 | 10879.71088 | 9861.848467 | 17696.02673 | 14570.01691 | 14306.15699 | 12900.59618  | 11507.27073 |
| P111031 | Sub1       | Activated RNA polymerase II transcriptional coactivator p15       | 35.967   | 15.75 | 14427  | 2  | 33524.67744 | 37580.02201 | 35331.34759 | 36123.66805 | 38590.04276 | 36893.98859 | 34404.97894 | 32751.78087 | 36165.59511 | 37052.2178  | 41582.83288 | 40646.89677 | 42826.54127 | 42885.04858  | 34890.54719 |
| P11103  | Parp1      | Poly [ADP-ribose] polymerase 1                                    | 499.094  | 19.94 | 113100 | 14 | 176669.3946 | 165246.5951 | 186738.0231 | 180237.0127 | 147865.975  | 129466.5179 | 129711.0268 | 119223.2005 | 144080.4083 | 101756.8306 | 165229.3822 | 164404.4804 | 148321.9166 | 163870.0722  | 139027.1872 |
| P11157  | Rrm2       | Ribonucleic acid-diphosphate reductase subunit M2                 | 154.207  | 6.92  | 45096  | 2  | 7521.543559 | 8606.449731 | 9515.558651 | 9969.680926 | 8508.566791 | 9632.020984 | 9250.797627 | 10832.77073 | 10634.45819 | 8670.997117 | 10368.80199 | 9110.259306 | 8330.842156 | 8054.522366  | 8913.590259 |
| P11167  | Slc2a1     | Solute carrier family 2, facilitated glucose transporter member 1 | 91.916   | 3.86  | 53963  | 3  | 54798.40015 | 53621.67155 | 61101.94245 | 60189.07275 | 52347.89543 | 54404.37445 | 60125.01056 | 64318.06249 | 60382.09808 | 58966.34954 | 47567.00436 | 55968.55376 | 52407.31379 | 58713.62274  | 57706.32924 |
| P11240  | Cox5a      | Cytochrome c oxidase subunit 5A, mitochondrial                    | 114.351  | 27.4  | 16130  | 3  | 36882.30556 | 17955.13544 | 29665.45051 | 40046.09176 | 37278.33774 | 43100.15294 | 27917.55372 | 25861.66436 | 36989.19876 | 12484.00552 | 28318.64603 | 17515.05646 | 33784.15033 | 54044.28582  | 32918.2824  |
| P11352  | Gpx1       | Glutathione peroxidase 1                                          | 33.565   | 15.42 | 22329  | 2  | 0.008226335 | 0.007562416 |             |             |             |             |             |             |             |             |             |             |             |              |             |

|        |          |                                                                |          |       |        |    |             |             |             |             |             |              |             |              |             |             |             |             |              |              |             |
|--------|----------|----------------------------------------------------------------|----------|-------|--------|----|-------------|-------------|-------------|-------------|-------------|--------------|-------------|--------------|-------------|-------------|-------------|-------------|--------------|--------------|-------------|
| P12265 | Gusb     | Beta-glucuronidase                                             | 922.641  | 47.69 | 74195  | 24 | 957313.4583 | 897881.2682 | 733869.3086 | 774917.1067 | 774041.8867 | 539496.8875  | 575199.5918 | 522805.8417  | 576562.4429 | 648992.0208 | 789073.6224 | 724976.3516 | 800412.1109  | 816334.2613  | 769220.3331 |
| P12368 | Prkar2a  | cAMP-dependent protein kinase type II-alpha regulatory subunit | 196.091  | 21.2  | 45480  | 6  | 24147.84592 | 21105.48657 | 17230.68304 | 23488.313   | 25542.0228  | 15083.15987  | 21608.28302 | 15583.67363  | 25236.01468 | 19372.97974 | 29451.62232 | 23066.2076  | 12486.53504  | 27202.65025  | 24264.26154 |
| P12382 | Pfkfb    | ATP-dependent 6-phosphofructokinase, liver type                | 814.492  | 35.13 | 85360  | 20 | 422151.3192 | 494340.9956 | 428366.7858 | 418021.5543 | 462092.5033 | 398424.1637  | 399882.3037 | 422020.3384  | 411998.4101 | 431679.938  | 427420.1349 | 421910.2471 | 469296.1387  | 471921.8148  | 431763.163  |
| P12815 | Pdcd6    | Programmed cell death protein 6                                | 164.125  | 42.41 | 21867  | 4  | 37132.13937 | 35198.54925 | 33444.65367 | 33814.28098 | 31260.70978 | 26589.78541  | 25926.4765  | 27567.79107  | 30959.22015 | 29178.20909 | 31910.10362 | 30695.14357 | 34564.0393   | 32178.81492  | 33097.44398 |
| P12970 | Rpl7a    | 60S ribosomal protein L7a                                      | 552.629  | 53.38 | 29977  | 16 | 940026.6372 | 996769.8359 | 948022.0748 | 932551.9436 | 954359.8801 | 899642.9708  | 1114657.451 | 1083516.321  | 1067781.942 | 931120.293  | 931965.1628 | 981529.8123 | 897174.5627  | 902745.5651  | 955964.5228 |
| P13020 | Gsn      | Gelsolin                                                       | 1819.541 | 61.03 | 85942  | 44 | 4273537.252 | 4589352.044 | 4147595.766 | 4275285.908 | 4468035.598 | 3163679.377  | 3279380.327 | 3121558.096  | 2931246.779 | 3468644.671 | 4065772.278 | 3825802.124 | 4114477.634  | 3889786.781  | 3822283.606 |
| P13084 | Npm1     | Nucleophosmin                                                  | 512.731  | 39.04 | 32560  | 13 | 924459.8442 | 912642.8616 | 908040.2516 | 977502.3105 | 964659.8016 | 934118.3266  | 936707.1477 | 971746.1239  | 689917.0821 | 894033.1629 | 982874.3083 | 937885.3898 | 921848.0432  | 920002.9776  | 851565.1732 |
| P13379 | Cd5      | T-cell surface glycoprotein CD5                                | 215.179  | 18.62 | 53849  | 6  | 132250.1288 | 148942.2991 | 117595.6547 | 115518.8087 | 141436.8064 | 127858.925   | 117968.3071 | 112970.5338  | 108294.1651 | 109090.4926 | 84557.78508 | 104504.4492 | 128064.5347  | 119790.9243  | 140431.5002 |
| P13439 | Umps     | Uridine 5'-monophosphate synthase                              | 164.849  | 12.68 | 52292  | 5  | 33067.6531  | 40673.41681 | 43304.95928 | 34639.34557 | 44716.66434 | 47217.70055  | 48545.22281 | 49129.65879  | 42718.86593 | 43479.07478 | 39377.04339 | 46981.03481 | 47236.26727  | 45079.93593  | 51577.05496 |
| P13471 | Rps14    | 40S ribosomal protein S14                                      | 311.078  | 66.89 | 16259  | 9  | 412032.9925 | 417151.9327 | 401519.9465 | 388677.2142 | 421716.0307 | 370168.7389  | 434378.1366 | 408967.6881  | 376770.0206 | 358786.8669 | 399914.6889 | 388175.4801 | 389631.1285  | 357666.0076  | 146847.6089 |
| P13668 | Stmn1    | Stathmin                                                       | 133.677  | 20.81 | 17288  | 3  | 29627.59298 | 26582.06514 | 31565.5653  | 28988.30868 | 25721.62958 | 33084.72835  | 27025.61726 | 25731.88939  | 25237.98719 | 28896.02093 | 31610.68624 | 30718.60614 | 27965.12677  | 28567.50029  | 31399.43386 |
| P13832 | Rlc-a    | Myosin regulatory light chain RLC-A                            | 323.911  | 62.21 | 19895  | 9  | 288074.8863 | 243261.1864 | 264530.5555 | 267275.7019 | 287919.4156 | 281607.7221  | 238012.1087 | 227580.4357  | 250202.5362 | 253733.1102 | 276914.3315 | 277683.7141 | 302376.0291  | 274221.6783  | 284715.6354 |
| P13864 | Dnmt1    | DNA (cytosine-5)-methyltransferase 1                           | 633.574  | 15    | 183189 | 19 | 157446.67   | 167368.7451 | 178273.8162 | 164405.7252 | 177585.3583 | 173946.3669  | 173034.5739 | 188698.8929  | 173139.5038 | 183148.0411 | 162729.4719 | 171190.7564 | 156101.6246  | 171052.8619  | 164139.6353 |
| P14069 | S100a6   | Protein S100-A6                                                | 189.18   | 78.65 | 10051  | 6  | 1475254.916 | 1346599.079 | 1811803.691 | 1167499.991 | 1273583.98  | 780560.0736  | 784260.5919 | 1372953.175  | 989172.5503 | 777370.4371 | 1112436.618 | 1044828.126 | 9669225.3079 | 894718.5924  | 919118.3222 |
| P14115 | Rpl27a   | 60S ribosomal protein L27a                                     | 165.384  | 22.3  | 16605  | 4  | 251604.4487 | 281065.8386 | 259889.3924 | 253659.8229 | 273213.0804 | 302284.4801  | 319616.3141 | 335720.03    | 309138.7483 | 287038.2129 | 252421.2839 | 267204.8342 | 255775.4493  | 239804.012   | 297720.4002 |
| P14131 | Rps16    | 40S ribosomal protein S16                                      | 263.487  | 52.05 | 16445  | 10 | 758597.2465 | 764597.5028 | 753821.9523 | 834505.0686 | 794222.2869 | 844077.3618  | 896367.4488 | 908372.8894  | 926429.3221 | 891551.5056 | 767183.946  | 930588.5549 | 804625.1299  | 837723.8206  | 818720.0021 |
| P14148 | Rpl7     | 60S ribosomal protein L7                                       | 220.793  | 31.48 | 31420  | 8  | 104689.4787 | 76632.46149 | 99615.70071 | 112751.3365 | 112247.2151 | 188307.7049  | 248458.8931 | 209632.0105  | 240837.2347 | 222102.4083 | 100693.0556 | 148036.4906 | 125724.8237  | 93349.23042  | 162682.5774 |
| P14152 | Mdh1     | Malate dehydrogenase, cytoplasmic                              | 618.435  | 47.6  | 36511  | 13 | 803781.6768 | 833422.6852 | 791333.4794 | 816405.5654 | 817977.043  | 670679.0872  | 710145.4455 | 722568.2888  | 706358.7533 | 688691.5059 | 746250.828  | 785122.1216 | 723093.9546  | 778977.1051  | 743505.6133 |
| P14206 | Rpsa     | 40S ribosomal protein SA                                       | 721.327  | 57.63 | 32838  | 16 | 1596701.16  | 1868727.377 | 1649457.002 | 1766340.043 | 1782659.848 | 1214712.203  | 1474296.387 | 1367801.419  | 1251295.601 | 1698761.669 | 1677039.37  | 1536935.849 | 1477521.451  | 1484104.555  |             |
| P14211 | Calr     | Calreticulin                                                   | 725.785  | 58.41 | 47995  | 23 | 2262972.197 | 2142861.438 | 2083942.611 | 2121351.557 | 2198651.962 | 2592538.375  | 2412202.707 | 2448570.679  | 2479346.283 | 2324927.57  | 2177894.49  | 2152030.509 | 2197709.867  | 2229371.41   | 2183858.144 |
| P14576 | Srp54    | Signal recognition particle 54 kDa protein                     | 68.357   | 8.93  | 55721  | 3  | 18395.50073 | 20393.42842 | 21346.55273 | 20467.12218 | 18038.17687 | 6178.030274  | 8989.676794 | 19848.94186  | 19150.74239 | 20097.77773 | 17415.88656 | 20873.77951 | 17979.60654  | 17100.06676  | 19223.08483 |
| P14685 | Psmd3    | 26S proteasome non-ATPase regulatory subunit 3                 | 410.713  | 25.66 | 60718  | 11 | 182469.9152 | 199012.7359 | 201565.0115 | 192621.3959 | 195571.6194 | 209823.8309  | 235282.034  | 222864.8502  | 220811.6067 | 204560.2549 | 198289.9852 | 193853.1822 | 196063.1128  | 194999.2263  | 198333.5067 |
| P14733 | Lmnb1    | Lamin-B1                                                       | 1089.586 | 57.99 | 66786  | 32 | 798742.0919 | 800963.708  | 827822.348  | 811240.4732 | 835253.2833 | 713690.0239  | 733323.3832 | 676299.3276  | 715340.8181 | 714114.3081 | 778236.4453 | 775402.4149 | 782313.9657  | 805848.618   | 750061.1876 |
| P14824 | Anxa6    | Annexin A6                                                     | 901.215  | 49.03 | 75885  | 27 | 401262.8769 | 419406.1981 | 379407.8668 | 411517.3709 | 402444.2682 | 414277.636   | 385650.6626 | 388219.5784  | 413867.9034 | 417435.9163 | 400193.7066 | 416034.4693 | 429665.0067  | 433299.4383  | 416767.3717 |
| P14869 | Rplp0    | 60S acidic ribosomal protein P0                                | 485.889  | 50.47 | 34216  | 11 | 886598.4977 | 936993.5377 | 937544.3521 | 943630.9303 | 927806.2381 | 858277.6278  | 110184.12   | 1690428.7646 | 947189.2575 | 915159.1925 | 822486.6104 | 945797.5069 | 830097.3517  | 865893.7267  | 915425.3724 |
| P14901 | Hmxo1    | Heme oxygenase 1                                               | 113.408  | 17.99 | 32929  | 3  | 13269.84291 | 16814.54543 | 16955.96649 | 18077.50744 | 15987.73137 | 16864.87692  | 20622.00577 | 17603.84423  | 15910.79517 | 14089.40439 | 17724.92545 | 15745.84452 | 15571.38117  | 14102.42635  | 15231.84828 |
| P15307 | Rel      | Proto-oncogene c-Rel                                           | 32.916   | 4.26  | 64960  | 2  | 3054.836793 | 4084.514112 | 4708.266511 | 4157.772293 | 5299.297463 | 6235.991367  | 4434.638042 | 4462.438914  | 5345.161715 | 5210.689351 | 3366.154271 | 4313.608314 | 4068.443027  | 4825.117662  | 5157.161884 |
| P15379 | Cd44     | CD44 antigen                                                   | 157.423  | 5.4   | 85617  | 4  | 103019.8205 | 116311.9424 | 103651.0915 | 93331.87304 | 109898.1572 | 116554.2963  | 94727.99112 | 93847.96138  | 110721.935  | 100615.2506 | 107826.5698 | 111941.5999 | 124356.3815  | 123498.6321  | 129839.9116 |
| P15429 | Eno3     | Eno3-enolase                                                   | 440.355  | 19.35 | 47014  | 6  | 454116.1271 | 466351.1943 | 388086.271  | 443157.1648 | 472476.7035 | 402459.2198  | 420399.4663 | 422363.137   | 391885.7093 | 424566.5853 | 377157.3186 | 431400.1938 | 467166.9844  | 4494531.5754 | 410162.316  |
| P15532 | Nme1     | Nucleoside diphosphate kinase A                                | 349.309  | 69.08 | 17208  | 11 | 379268.0583 | 393672.7192 | 369495.9236 | 391599.589  | 388728.3222 | 403240.4535  | 387813.0279 | 328844.1245  | 376129.6619 | 402684.8522 | 375495.963  | 387569.9416 | 362405.3124  |              |             |
| P15651 | Acads    | Short-chain specific acyl-CoA dehydrogenase, mitochondrial     | 152.91   | 14.81 | 44765  | 5  | 44345.86218 | 41180.00792 | 39556.73706 | 15632.39262 | 38797.19759 | 34888.94662  | 36857.85206 | 39699.69588  | 45666.57795 | 23515.85591 | 46406.36447 | 40489.64184 | 44335.18119  | 43205.53339  | 37423.77526 |
| P15702 | Spn      | Leukosialin                                                    | 103.556  | 9.62  | 40038  | 2  | 14853.66851 | 14233.34454 | 14701.86166 | 15468.43538 | 46698.26351 | 70019.29397  | 60215.1606  | 58564.54789  | 60177.31488 | 57170.44202 | 18221.39163 | 46763.53166 | 45257.53444  | 0.00945634   | 11923.16376 |
| P15864 | Hist1h1c | Histone H1.2                                                   | 41.584   | 16.04 | 21267  | 3  | 56425.07981 | 43960.18636 | 57196.35249 | 53962.43447 | 45579.806   | 1265604.7035 | 63624.26559 | 61026.41891  | 80390.37428 | 89961.93163 | 57442.56981 | 48214.20783 | 49919.85002  | 52731.97284  | 85028.51956 |
| P16045 | Lgals1   | Galectin-1                                                     | 739.544  | 94.81 | 14866  | 15 | 1018485.738 | 863511.2988 | 892948.0887 | 751039.368  | 745615.4655 | 667351.5087  | 650364.803  | 601819.4495  | 654489.22   | 610574.3107 | 846281.4862 | 811152.6153 | 793474.3748  | 781777.3164  | 748009.7422 |
| P16110 | Lgals3   | Galectin-3                                                     | 576.284  | 30.68 | 27515  | 12 | 1169621.024 | 1027561.694 | 996914.8429 | 984889.0842 | 837723.7171 | 662869.063   | 765936.6418 | 648957.1413  | 676283.5416 | 635885.0102 | 1076787.755 | 935526.1084 | 868780.9981  | 881177.668   | 837618.4777 |
| P16330 | Cnp      | 2',3'-cyclic-nucleotide 3'-phosphodiesterase                   | 106.342  | 8.81  | 47123  | 3  | 4882.079117 | 4257.701978 | 3242.539498 | 5196.943993 | 3496.470977 | 2083.650019  | 2511.014357 | 3597.164646  | 3788.442367 | 3462.323443 | 4127.655346 | 4901.234283 | 4176.513081  | 3848.783128  | 4059.286353 |
| P16332 | Mut      | Methylmalonyl-CoA mutase, mitochondrial                        | 107.713  | 7.35  | 82844  | 4  | 26024.94551 | 29136.44498 | 30318.56073 | 30892.99559 | 29158.51587 | 33858.57646  | 35935.58157 | 30521.8433   | 36195.62535 | 34351.31014 | 28728.88274 | 30228.19266 | 30569.89302  | 27219.28395  | 31284.40474 |
| P16446 | Pitpna   | Phosphatidylinositol transfer protein alpha isoform            | 125.049  | 40.96 | 31907  | 8  | 155140.8776 | 158746.3963 | 145309.3135 | 145705.2212 | 148475.4002 | 109878.8636  | 109076.6649 | 99940.90018  | 100265.1895 | 122419.1245 | 156407.1255 | 140785.1023 | 115958.1607  | 146264.5049  | 145406.5205 |
| P16460 | Ass1     | Argininosuccinate synthase                                     | 229.08   | 26.21 | 46584  | 10 | 26640.81011 | 30540.1957  | 37466.49524 | 26158.04878 | 36157.73525 | 227123.0516  | 209305.4381 | 239170.8939  | 216288.1909 | 129783.3364 | 37608.05788 | 50082.59113 | 40506.4436   | 45401.99048  | 47462.7004  |
| P16546 | Sptan1   | Spectrin alpha chain, non-erythrocytic 1                       | 408.587  | 7.2   | 284597 | 13 | 82159.40535 | 86486.16815 | 68529.54461 | 68020.1039  | 74881.33363 | 56126.29745  |             |              |             |             |             |             |              |              |             |



|        |         |                                                                                    |          |       |        |    |             |             |              |             |             |             |             |             |             |             |             |             |             |             |             |
|--------|---------|------------------------------------------------------------------------------------|----------|-------|--------|----|-------------|-------------|--------------|-------------|-------------|-------------|-------------|-------------|-------------|-------------|-------------|-------------|-------------|-------------|-------------|
| P18155 | Mthfd2  | Bifunctional methylenetetrahydrofolate dehydrogenase/cyclohydrolase, mitochondrial | 92.016   | 21.71 | 37863  | 3  | 6528.54003  | 8519.781611 | 8914.609088  | 10252.59457 | 6465.215465 | 15415.33707 | 18768.85637 | 17360.16775 | 13248.56071 | 6674.025105 | 8614.913579 | 16081.49493 | 7569.150014 | 9320.430162 | 7732.265146 |
| P18242 | Ctsd    | Cathepsin D                                                                        | 859.885  | 54.39 | 44954  | 24 | 3486009.506 | 3181916.544 | 2556173.311  | 2712380.763 | 2746133.921 | 2063456.244 | 2209473.362 | 1953448.42  | 2184164.801 | 2093347.947 | 3099020.171 | 2796425.376 | 2927266.118 | 3046832.63  | 2821723.634 |
| P18572 | Bsg     | Basigin                                                                            | 59.597   | 9.77  | 42445  | 3  | 19205.6179  | 20426.20582 | 17169.73992  | 19827.60049 | 17761.75414 | 22546.83243 | 22389.35488 | 26367.74579 | 24688.91205 | 21363.58178 | 19131.22658 | 20975.19478 | 19063.47083 | 19938.00645 | 20378.58857 |
| P18653 | Rps6ka1 | Ribosomal protein S6 kinase alpha-1                                                | 168.673  | 9.25  | 81595  | 6  | 36831.26527 | 37419.56648 | 31669.55149  | 35227.07716 | 35909.5611  | 32099.83984 | 34694.08759 | 37147.95581 | 36464.73839 | 35293.7067  | 32777.74315 | 25788.78294 | 39251.29468 | 29764.29463 | 38567.15611 |
| P18654 | Rps6ka3 | Ribosomal protein S6 kinase alpha-3                                                | 227.92   | 13.51 | 83694  | 9  | 71039.62932 | 73037.93943 | 63383.93274  | 62485.12274 | 69019.79814 | 51198.28325 | 59854.46785 | 68652.43263 | 68600.72243 | 67102.17318 | 73607.62817 | 66266.13647 | 74477.9855  | 47729.02545 | 67351.45236 |
| P18666 | My12b   | Myosin regulatory light chain 12B                                                  | 271.774  | 50.58 | 19838  | 8  | 285538.2136 | 243322.3663 | 265505.5312  | 265932.0985 | 284653.3432 | 281715.1131 | 238044.684  | 229293.6097 | 249800.8119 | 252356.8419 | 275110.7746 | 277686.8116 | 301616.5335 | 272124.7539 | 280978.3016 |
| P18760 | Cfi1    | Cofilin-1                                                                          | 690.857  | 73.49 | 18560  | 14 | 4079557.369 | 3736853.868 | 3271299.932  | 3483498.016 | 3558292.254 | 2690209.071 | 3090002.942 | 2943822.471 | 2968897.066 | 2784959.544 | 3630720.195 | 3173095.683 | 3566846.162 | 3436213.83  | 3297672.223 |
| P19096 | Fasn    | Fatty acid synthase                                                                | 3301.881 | 53.55 | 272428 | 87 | 1647409.607 | 1758399.96  | 1664420.134  | 1658048.091 | 1548736.57  | 1382850.444 | 1528066.879 | 1534771.681 | 1480953.347 | 1384053.748 | 1644986.062 | 1674982.385 | 1583010.917 | 1598236.392 | 1587597.435 |
| P19139 | Csnk2a1 | Casein kinase II subunit alpha                                                     | 141.339  | 24.55 | 45073  | 6  | 76034.08429 | 66710.62502 | 69416.96732  | 71021.0816  | 62903.91804 | 69228.56508 | 79121.81668 | 74034.87584 | 76625.14863 | 86554.97415 | 72686.86014 | 70872.29076 | 80583.32598 | 74196.59659 | 68658.24279 |
| P19253 | Rpl13a  | 60S ribosomal protein L13a                                                         | 144.874  | 27.59 | 23464  | 6  | 262092.2036 | 276162.6103 | 278112.7717  | 281233.3329 | 293542.4149 | 384131.8608 | 377854.33   | 401350.9088 | 401262.8525 | 361044.7984 | 296866.0436 | 334145.5026 | 292754.8427 | 288498.387  | 328361.522  |
| P19783 | Cox4i1  | Cytochrome c oxidase subunit 4 isoform 1, mitochondrial                            | 181.422  | 30.77 | 19530  | 5  | 152733.9341 | 167376.3075 | 162399.3484  | 160146.8847 | 165220.0632 | 181846.6106 | 173956.9802 | 169912.3426 | 181957.0049 | 186723.6455 | 179583.1671 | 169602.6559 | 175008.0486 | 167308.5296 | 168891.1918 |
| P19973 | Lsp1    | Lymphocyte-specific protein 1                                                      | 598.308  | 46.06 | 36714  | 12 | 507845.6137 | 470264.5932 | 442871.8065  | 395328.5387 | 41327.835   | 339035.3352 | 361245.1384 | 300981.1631 | 297177.0169 | 341216.6612 | 414119.4219 | 377151.9388 | 416378.112  | 397496.5261 | 368137.6066 |
| P20060 | Hexb    | Beta-hexosaminidase subunit beta                                                   | 453.303  | 38.06 | 61116  | 16 | 205799.539  | 251540.8821 | 214056.1169  | 225602.5555 | 225005.9463 | 194354.6039 | 140166.307  | 181033.3447 | 193838.1401 | 146432.0648 | 224035.0238 | 201569.5923 | 196119.9416 | 232477.5371 | 224087.4925 |
| P20108 | Prdx3   | Thioredoxin-dependent peroxide reductase, mitochondrial Prx3                       | 201.247  | 42.8  | 28127  | 8  | 177021.4653 | 208692.991  | 200427.3211  | 199514.3974 | 203364.7704 | 244162.6497 | 223185.7404 | 218994.819  | 224172.335  | 234251.9905 | 200029.6536 | 211024.4878 | 211257.6554 | 216127.9798 | 219472.217  |
| P20152 | Vim     | Vimentin                                                                           | 2334.946 | 84.12 | 53688  | 58 | 13333859.25 | 12695979.03 | 11874148.08  | 12236534.33 | 11847859.53 | 10401975.38 | 11917033.83 | 1046571.216 | 10628389.37 | 11971825.11 | 13136296.79 | 12479391.93 | 12834910.03 | 12357881.1  | 10786640.55 |
| P20491 | Fcer1g  | High affinity immunoglobulin epsilon receptor subunit gamma                        | 107.446  | 25.58 | 9652   | 3  | 219974.5513 | 212848.0695 | 204452.7506  | 204267.3769 | 216755.2635 | 242411.0691 | 218590.4781 | 233933.5419 | 215342.69   | 249051.1178 | 211674.1603 | 203882.1568 | 213734.2764 | 13980.0101  | 228415.598  |
| P20611 | Acp2    | Lysosomal acid phosphatase                                                         | 47.903   | 4.49  | 48320  | 2  | 12980.64918 | 11988.39323 | 12286.80623  | 11322.33388 | 9918.447982 | 10626.59052 | 12616.9716  | 12804.99052 | 14420.14778 | 13263.32223 | 10614.86456 | 4570.278612 | 14007.52653 | 13286.19024 | 13669.33039 |
| P21107 | Tpm3    | Tropomyosin alpha-3 chain                                                          | 198.317  | 29.82 | 32994  | 11 | 687946.2539 | 505291.8575 | 630474.2145  | 624577.846  | 577723.9016 | 537671.9682 | 597976.945  | 542081.8306 | 606217.0077 | 616796.6495 | 629390.0185 | 560341.611  | 524573.3033 | 638906.7012 | 612655.8718 |
| P21279 | Gnaq    | Guanine nucleotide-binding protein G(q) subunit alpha                              | 213.382  | 17.27 | 42158  | 5  | 29040.07839 | 27759.04359 | 29192.95263  | 26249.15682 | 21936.0811  | 21545.10204 | 23994.18881 | 22773.12103 | 23956.34765 | 24942.46957 | 25223.66266 | 22952.99084 | 24680.56451 | 22836.15234 | 25446.94713 |
| P21300 | Akr1b7  | Aldose reductase-related protein 1                                                 | 111.066  | 15.82 | 35988  | 6  | 201564.2596 | 185546.7808 | 181711.0237  | 187702.9147 | 183192.5864 | 193358.584  | 209095.7116 | 205194.2216 | 198545.4168 | 185280.0303 | 194219.14   | 200118.8889 | 206074.9576 | 204465.0979 | 206797.159  |
| P21575 | Dnm1    | Dynamin-1                                                                          | 42.89    | 3.94  | 97295  | 4  | 60213.63217 | 63484.3548  | 63073.70972  | 61717.92324 | 62232.6786  | 70938.91803 | 70460.97975 | 66737.62076 | 71888.72076 | 69304.75933 | 65234.83643 | 72267.33786 | 66930.10088 | 66640.80158 | 69946.82997 |
| P21619 | LmnB2   | Lamin-B2                                                                           | 262.278  | 18.96 | 67318  | 11 | 301689.5371 | 265232.8928 | 298083.9408  | 286754.8142 | 305382.9272 | 267101.1316 | 275601.506  | 196285.8026 | 265088.9547 | 283547.6579 | 300674.6721 | 279497.7906 | 279861.3731 | 311133.8569 | 272060.6144 |
| P21670 | Pisma4  | Proteasome subunit alpha type-4                                                    | 257.786  | 46.36 | 29478  | 7  | 113086.7244 | 102374.9019 | 119383.1483  | 119810.0507 | 121847.8207 | 105269.0275 | 118735.3079 | 115862.7431 | 110726.5629 | 103899.5958 | 105875.7794 | 116045.4441 | 114270.4789 | 115552.7631 | 116602.6559 |
| P21788 | Mapk3   | Mitogen-activated protein kinase 3                                                 | 616.377  | 62.37 | 43081  | 17 | 381849.581  | 368153.5591 | 305185.9091  | 335128.2406 | 346758.3454 | 303075.5033 | 261840.811  | 26979.5048  | 262982.8636 | 316531.238  | 342251.7518 | 312026.3252 | 342858.7267 | 374685.452  | 316166.7017 |
| P21855 | Cd72    | B-cell differentiation antigen CD72                                                | 115.763  | 10.73 | 40347  | 3  | 23549.84687 | 26321.19961 | 199602.58898 | 14560.54052 | 19382.07947 | 24533.50518 | 23069.86068 | 24728.12746 | 26505.7852  | 25999.68282 | 27100.89265 | 15416.5647  | 21345.87482 | 21441.81979 | 25734.57561 |
| P21956 | Mtgef   | Lactadherin                                                                        | 107.297  | 12.31 | 51241  | 4  | 25934.37356 | 28469.9844  | 22546.53313  | 35534.58743 | 30383.51203 | 37076.48125 | 35904.42328 | 41784.40991 | 36459.73082 | 30080.02238 | 21713.57047 | 33597.22049 | 25684.46188 | 28836.66554 | 25922.49285 |
| P21958 | Tap1    | Antigen peptide transporter 1                                                      | 167.833  | 13.26 | 78864  | 6  | 30447.1766  | 20772.79889 | 20747.53662  | 21398.04194 | 21123.5203  | 31134.77768 | 22319.78821 | 20747.03348 | 26536.53159 | 27361.44715 | 19962.25892 | 36864.07608 | 29774.09865 | 18671.96218 | 18639.9539  |
| P22437 | Ptgs1   | Prostaglandin G/H synthase 1                                                       | 696.456  | 49.17 | 69042  | 19 | 433215.7731 | 455019.1261 | 399279.2958  | 434137.1643 | 443337.2694 | 371643.3944 | 322282.739  | 300295.1214 | 347545.7452 | 404945.7635 | 397657.7966 | 381032.4969 | 431493.1021 | 412416.474  | 400772.3388 |
| P22509 | Fbl     | rRNA 2'-O-methyltransferase fibrillar                                              | 373.27   | 49.85 | 34222  | 12 | 393057.1074 | 363254.2027 | 372857.778   | 351674.2322 | 373405.3254 | 373061.5774 | 372988.1174 | 370621.4506 | 365840.1863 | 351718.3232 | 363879.0827 | 355937.3905 | 372165.87   | 394331.3758 | 339358.3169 |
| P22682 | Cbl     | E3 ubiquitin-protein ligase CBL                                                    | 70.203   | 3.61  | 100564 | 2  | 12235.89025 | 12348.5788  | 12000.86203  | 10004.00722 | 12262.7365  | 9192.402006 | 12916.17976 | 9944.72762  | 11642.779   | 10288.72216 | 13995.76241 | 11573.47382 | 10529.12992 | 11086.54045 | 11008.96966 |
| P22892 | Ap1g1   | AP-1 complex subunit gamma-1                                                       | 392.919  | 19.1  | 91350  | 12 | 12608.2875  | 113158.0521 | 117250.0453  | 110250.6333 | 116049.5827 | 106342.7408 | 118572.5303 | 124272.9751 | 121794.4378 | 115405.5799 | 116360.2658 | 121639.5352 | 125597.8324 | 130209.3933 | 114576.4382 |
| P22907 | Hmbs    | Porphobilinogen deaminase                                                          | 130.623  | 18.01 | 39344  | 5  | 36401.87935 | 38947.57146 | 39131.48921  | 42968.70697 | 4140.98759  | 34746.16942 | 41326.81731 | 43043.44447 | 39515.42412 | 32784.48319 | 36459.6771  | 35000.20618 | 34445.8822  | 31700.92525 | 39141.54128 |
| P23116 | Eif3a   | Eukaryotic translation initiation factor 3 subunit A                               | 755.463  | 20.54 | 161936 | 23 | 284581.4908 | 312976.9642 | 329336.7439  | 315103.6127 | 305473.7194 | 308736.0217 | 334950.8163 | 317303.7171 | 332875.9335 | 284462.3818 | 317881.6534 | 336489.1332 | 321105.0596 | 306966.4102 | 300413.6144 |
| P23198 | Cbx3    | Chromobox protein homolog 3                                                        | 366.566  | 42.62 | 20855  | 7  | 181265.1684 | 164451.0139 | 166250.5417  | 151729.2973 | 157472.4571 | 135580.8525 | 148903.7415 | 145687.7828 | 127410.4819 | 117736.6392 | 154881.6528 | 140744.2726 | 155029.1393 | 140583.3252 | 138479.4631 |
| P23249 | Mov10   | Putative helicase MOV-10                                                           | 210.926  | 8.76  | 113583 | 5  | 13893.24489 | 21290.75252 | 12588.34313  | 17977.70635 | 16878.23095 | 17956.39057 | 16281.04325 | 22844.97426 | 19862.27414 | 18593.95194 | 19225.98124 | 16636.78145 | 18124.8137  | 18176.97126 | 19759.65111 |
| P23475 | Xrcc6   | X-ray repair cross-complementing protein 6                                         | 172.197  | 15.95 | 69484  | 6  | 30397.69313 | 26603.56697 | 26802.89878  | 21422.40956 | 19911.2205  | 22968.01407 | 27516.5094  | 25353.19426 | 29251.02346 | 33487.35616 | 19825.92238 | 23689.04581 | 33095.76672 | 21198.9999  | 17733.57162 |
| P23492 | Pnp     | Purine nucleoside phosphorylase                                                    | 251.547  | 31.49 | 32277  | 7  | 135185.5732 | 149361.7409 | 169505.5962  | 153615.5549 | 158496.8119 | 129690.14   | 130946.5287 | 145799.9151 | 128537.4148 | 120052.0207 | 137573.9142 | 151188.0651 | 139668.2511 | 151424.0351 | 150059.912  |
| P23591 | Tsta3   | GDP-L-fucose synthase                                                              | 149.431  | 18.69 | 35878  | 4  | 20211.5856  | 26494.98014 | 18521.99669  | 26500.44964 | 21421.6781  | 15456.90636 | 23425.87036 | 11258.03792 | 18959.52279 | 16810.00595 | 23949.27454 | 19691.45338 | 18940.56349 | 22408.03075 | 22854.35647 |
| P23780 | Glb1    | Beta-galactosidase                                                                 | 558.879  | 27.36 | 73121  | 14 | 340958.574  | 323585.4302 | 275563.0107  | 300544.2839 | 265219.3831 | 231928.4844 | 246125.9947 | 233130.0221 | 242555.4198 | 275885.8331 | 280198.1861 | 239567.3106 | 304706.7724 | 308360.3881 | 306346.9421 |
| P24049 | Rpl17   | 60S ribosomal protein L17                                                          | 248.799  | 46.74 | 21397  | 8  | 145057.7761 | 160413.6367 | 146180.032   | 165907.9153 | 176641.8307 |             |             |             |             |             |             |             |             |             |             |

|        |         |                                                                                |          |       |        |    |             |             |             |             |             |             |             |             |             |             |             |             |             |             |             |
|--------|---------|--------------------------------------------------------------------------------|----------|-------|--------|----|-------------|-------------|-------------|-------------|-------------|-------------|-------------|-------------|-------------|-------------|-------------|-------------|-------------|-------------|-------------|
| P26040 | Ezr     | Ezrin                                                                          | 686.864  | 35.32 | 69407  | 21 | 2288924.771 | 2262365.756 | 2321924.872 | 2467061.518 | 2262552.077 | 2434898.335 | 2509015.93  | 2144583.161 | 2317616.239 | 2522809.741 | 2282502.081 | 2281179.081 | 2349590.771 | 2458283.973 | 2512921.719 |
| P26041 | Msn     | Moesin                                                                         | 2283.098 | 75.91 | 67767  | 64 | 6700957.438 | 6455066.547 | 6446020.481 | 6664342.558 | 6472790.207 | 6331356.37  | 6605123.333 | 6131361.424 | 6375972.529 | 6589812.326 | 6839948     | 6540733.344 | 6839466.429 | 6968232.323 | 6588426.662 |
| P26043 | Rdx     | Radixin                                                                        | 725.608  | 37.22 | 68543  | 22 | 2644547.536 | 2612303.293 | 2681833.252 | 2815841.671 | 2595404.33  | 2708650.654 | 2808725.053 | 2433873.134 | 2621765.527 | 2843350.555 | 2628223.957 | 2608346.867 | 2690908.835 | 2792952.153 | 2861085.924 |
| P26151 | Fcgr1   | High affinity immunoglobulin gamma Fc receptor I                               | 103.29   | 10.4  | 44888  | 3  | 12664.11419 | 11701.37119 | 13104.68528 | 12090.59838 | 11317.16977 | 8813.541143 | 9204.61279  | 10233.01719 | 11421.06251 | 9475.657953 | 11202.28949 | 10143.6461  | 13137.28753 | 11907.10841 | 10209.42393 |
| P26284 | Pdha1   | Pyruvate dehydrogenase E1 component subunit alpha, somatic form, mitochondrial | 124.753  | 11.54 | 43227  | 3  | 33987.57744 | 32313.97165 | 23120.63496 | 22969.56328 | 32869.22939 | 31397.49368 | 30156.15611 | 29876.72122 | 34149.15273 | 31510.24747 | 33896.28818 | 29168.86503 | 35101.94501 | 31079.60055 | 31120.92773 |
| P26350 | Ptma    | Prothymosin alpha                                                              | 360.673  | 36.04 | 12254  | 6  | 142795.4187 | 139083.2685 | 197963.5868 | 207257.285  | 180266.6376 | 191854.2818 | 167435.3435 | 180735.149  | 168030.7203 | 189576.35   | 157167.5605 | 187412.926  | 143538.4524 | 162797.4396 | 152136.6057 |
| P26369 | U2af2   | Splicing factor U2AF 65 kDa subunit                                            | 384.06   | 29.68 | 53517  | 10 | 132941.7826 | 134065.9535 | 152999.0423 | 143578.2222 | 136445.8064 | 114966.9574 | 137348.805  | 154753.2565 | 142563.6049 | 107424.337  | 124339.837  | 150747.9686 | 127436.8676 | 134463.0499 | 133581.3171 |
| P26443 | Glud1   | Glutamate dehydrogenase 1, mitochondrial                                       | 1054.563 | 57.71 | 61337  | 31 | 913737.5729 | 955763.393  | 877551.7605 | 878663.6201 | 840218.9485 | 917540.9779 | 801960.6971 | 824319.8661 | 902040.0207 | 868725.8202 | 837504.9653 | 909063.1173 | 925996.3051 | 913842.5128 | 854177.9045 |
| P26516 | Psmc7   | 26S proteasome non-ATPase regulatory subunit 7                                 | 536.353  | 57.63 | 36540  | 13 | 206425.0202 | 207311.7006 | 200838.8152 | 209144.9366 | 188912.6269 | 190314.9242 | 217051.8088 | 211564.7696 | 202880.2714 | 204604.8909 | 205495.1367 | 208899.334  | 195094.3557 | 187862.697  | 190127.9738 |
| P26638 | Sars    | Serine--tRNA ligase, cytoplasmic                                               | 962.88   | 54.3  | 58389  | 23 | 922304.0178 | 973630.9008 | 859825.1222 | 882140.4412 | 883823.2059 | 761219.6977 | 880074.7733 | 881424.9645 | 859231.6743 | 756118.9847 | 899131.9877 | 917092.9775 | 880287.2461 | 875527.316  | 890208.6156 |
| P26645 | Marcks  | Myristoylated alanine-rich C-kinase substrate                                  | 25.002   | 11    | 29661  | 2  | 26471.9111  | 19583.9153  | 21101.95052 | 16117.98193 | 19713.81939 | 26968.34363 | 20838.90826 | 16138.47882 | 18969.56107 | 28344.78498 | 24932.26152 | 20596.0485  | 27216.32093 | 19329.30899 | 14566.82868 |
| P26817 | Grk2    | Beta-adrenergic receptor kinase 1                                              | 67.4     | 6.24  | 79875  | 4  | 23886.69268 | 26134.2151  | 30062.96268 | 28092.16575 | 25287.53355 | 27618.15089 | 27374.64688 | 25915.83852 | 25754.22875 | 23451.87572 | 24603.06233 | 28331.42874 | 26714.97927 | 27509.03764 | 82067.82684 |
| P26883 | Fkbp1a  | Peptidyl-prolyl cis-trans isomerase FKBP1A                                     | 125.15   | 25    | 11923  | 2  | 80731.92229 | 75777.84802 | 67591.7669  | 67413.25197 | 69154.31673 | 52411.60406 | 55013.42145 | 51183.86796 | 50696.69556 | 54434.97847 | 68629.97543 | 62812.11626 | 66173.74992 | 68019.04416 | 59267.57151 |
| P27008 | Parp1   | Poly [ADP-ribose] polymerase 1                                                 | 679.782  | 24.85 | 112660 | 16 | 131113.603  | 139617.7044 | 144746.7639 | 137513.1696 | 135061.4982 | 115746.974  | 119858.5663 | 100576.9302 | 98007.6382  | 84542.04082 | 122749.4458 | 124316.9855 | 127622.8954 | 133563.7992 | 124541.9468 |
| P27546 | Map4    | Microtubule-associated protein 4                                               | 360.388  | 16.8  | 117429 | 13 | 152503.1854 | 155412.944  | 137253.0915 | 151441.3338 | 154751.0387 | 135121.5111 | 129334.1391 | 132570.6304 | 137573.444  | 145037.3747 | 144843.1473 | 129930.622  | 141305.6092 | 148738.8224 | 152038.8241 |
| P27601 | Gna13   | Guanine nucleotide-binding protein subunit alpha-13                            | 295.529  | 24.93 | 44055  | 7  | 47104.56784 | 51459.54665 | 42397.60855 | 35682.22844 | 40034.24124 | 38938.21533 | 43904.53667 | 40201.13927 | 43630.28559 | 46020.45322 | 38725.3456  | 42492.01676 | 48712.02855 | 46855.62846 | 39782.34741 |
| P27612 | Plaa    | Phospholipase A-2-activating protein                                           | 103.381  | 8.19  | 87221  | 4  | 1830.762044 | 11460.7909  | 1395.904914 | 3104.00446  | 7268.662078 | 5426.006839 | 3974.590268 | 10701.55595 | 6579.926772 | 2002.736323 | 3083.654009 | 7471.346469 | 2980.649488 | 4688.116909 | 7667.036636 |
| P27641 | Xrcc5   | X-ray repair cross-complementing protein 5                                     | 78.459   | 3.28  | 83057  | 2  | 7373.605752 | 7184.696672 | 7029.969925 | 7383.175798 | 6996.046322 | 7088.023613 | 5870.572264 | 8563.494903 | 6441.798556 | 6151.125783 | 6525.117267 | 8476.227577 | 7068.611741 | 6542.770451 | 1399.698453 |
| P27659 | Rpl3    | 60S ribosomal protein L3                                                       | 722.272  | 44.42 | 46110  | 23 | 772497.6472 | 776790.4159 | 800106.4163 | 779532.4462 | 774436.9286 | 912640.3094 | 1010706.91  | 998739.6515 | 957444.3796 | 923380.0922 | 844734.6422 | 877673.6111 | 803867.5175 | 767754.5483 | 854650.4224 |
| P27661 | H2afx   | Histone H2AX                                                                   | 358.821  | 52.45 | 15143  | 7  | 13682382.1  | 12537895.74 | 13951678.86 | 13323869.76 | 14337292.89 | 16254877.88 | 14496492.47 | 14779639.49 | 14421095.78 | 15782729.31 | 13634208.8  | 13065821.7  | 14172149.71 | 13688429.54 | 14755760.92 |
| P27704 | Mapk6   | Microtubule-associated protein kinase 6                                        | 43.662   | 2.5   | 82275  | 2  | 57331.89344 | 51417.91177 | 49422.34683 | 46751.39745 | 53781.19537 | 45234.5228  | 41639.54242 | 49397.37045 | 44867.5942  | 54061.94333 | 52452.93192 | 47569.72753 | 48767.61121 | 58351.30808 | 53773.74301 |
| P27773 | Pdia3   | Protein disulfide-isomerase A3                                                 | 1310.895 | 67.33 | 56673  | 34 | 1870878.994 | 1902343.223 | 1797064.463 | 1818613.719 | 1824297.691 | 2082046.25  | 1966529.681 | 1992033.614 | 2065410.821 | 2015997.515 | 1903671.952 | 1906018.16  | 1988455.807 | 1942544.743 | 1901172.104 |
| P27867 | Sord    | Sorbitol dehydrogenase                                                         | 47.078   | 7.28  | 38235  | 3  | 39365.22334 | 40272.98312 | 38100.45724 | 42193.89086 | 40845.44024 | 29678.28599 | 38779.27462 | 29983.54899 | 31249.29998 | 30262.12598 | 34927.42897 | 37422.06118 | 36511.1788  | 34664.32159 | 35405.87432 |
| P27870 | Vav1    | Proto-oncogene vav                                                             | 714.634  | 30.77 | 98137  | 20 | 251441.814  | 227767.3696 | 280648.6293 | 247574.6305 | 267598.2477 | 295496.2839 | 293335.2485 | 291719.7112 | 284236.9904 | 279966.6855 | 284813.4707 | 258898.948  | 264285.1598 | 279526.0985 | 254629.6278 |
| P28063 | Psmb8   | Proteasome subunit beta type-8                                                 | 321.323  | 23.91 | 30260  | 7  | 145714.1554 | 136934.6803 | 135536.58   | 154237.3557 | 164972.7983 | 135761.6404 | 155907.5984 | 147187.218  | 161677.4688 | 142690.4243 | 153865.3255 | 161734.8827 | 157545.0763 | 155958.5202 | 147108.8509 |
| P28271 | Aco1    | Cytoplasmic aconitate hydratase                                                | 290.564  | 15.86 | 98126  | 8  | 54424.82992 | 49271.1726  | 51139.21027 | 51461.99268 | 46483.63635 | 38684.67758 | 47520.79648 | 41035.61227 | 41259.46467 | 38712.05961 | 44727.69601 | 64546.66645 | 46252.41988 | 47934.7623  | 46763.40336 |
| P28352 | Apex1   | DNA-(apurinic or pyrimidinic site) lyase                                       | 249.51   | 38.8  | 35490  | 8  | 71974.45361 | 75384.21672 | 59284.70183 | 69387.44666 | 72215.51146 | 55391.69226 | 49640.40897 | 68726.54413 | 62552.655   | 49051.50837 | 62039.63499 | 54354.20113 | 65719.51745 | 67404.51921 | 56783.92063 |
| P28474 | Adh5    | Alcohol dehydrogenase class-3                                                  | 574.766  | 62.3  | 39548  | 15 | 275593.1006 | 288504.4424 | 261883.7933 | 275976.7131 | 280863.4469 | 278189.9968 | 281821.7288 | 275056.5241 | 298370.5414 | 297952.0015 | 241388.0799 | 261550.5945 | 265120.2046 | 275688.2241 | 258580.6763 |
| P28650 | Adss1   | Adenylosuccinate synthetase isozyme 1                                          | 216.936  | 24.07 | 50254  | 7  | 37206.90853 | 32330.61653 | 29438.64611 | 38154.03118 | 26164.02455 | 17641.39308 | 25055.08173 | 20924.85178 | 26352.70078 | 29027.04495 | 33919.4659  | 28114.55732 | 28022.66194 | 30401.84341 | 30488.86461 |
| P28656 | Nap11   | Nucleosome assembly protein 1-like 1                                           | 243.648  | 20.2  | 45345  | 7  | 72953.46978 | 66162.81875 | 68892.73312 | 65754.52489 | 59881.20502 | 61144.32755 | 66725.78861 | 65863.10736 | 68442.79861 | 63516.11912 | 71851.12668 | 68692.74874 | 66010.20543 | 66604.79656 | 59367.86552 |
| P28658 | Atxn10  | Ataxin-10                                                                      | 372.172  | 28.21 | 53707  | 9  | 79924.35117 | 80202.61744 | 77304.27889 | 75972.00102 | 68613.89022 | 74534.37052 | 82410.12271 | 88025.36223 | 82716.02146 | 71933.79126 | 77184.56801 | 77935.32636 | 72366.61469 | 73179.87933 | 74092.68019 |
| P28667 | Marcks1 | MARCKS-related protein                                                         | 68.906   | 17.5  | 20165  | 3  | 18449.00482 | 21605.00114 | 25940.62961 | 19393.36249 | 29338.10405 | 42612.19001 | 34104.00959 | 39635.16944 | 33583.92512 | 27901.91873 | 28140.71552 | 20386.26431 | 30997.75193 | 30012.88525 | 23642.82562 |
| P28740 | Kif2a   | Kinesin-like protein KIF2A                                                     | 100.667  | 5.53  | 79756  | 4  | 20494.91704 | 22409.2943  | 17569.59153 | 20612.50481 | 20786.37245 | 16770.32097 | 19948.65891 | 23867.56578 | 15738.40602 | 23471.25493 | 20137.69101 | 20242.72419 | 15922.3442  | 15010.54431 | 16685.91204 |
| P28798 | Gm      | Granulins                                                                      | 274.292  | 20.54 | 63458  | 9  | 164623.0782 | 114631.4527 | 122420.3782 | 116267.024  | 123277.4252 | 117579.9411 | 102307.7994 | 74869.93207 | 86591.10322 | 57644.12119 | 73503.57186 | 78936.20588 | 68454.86124 | 83406.74571 | 92731.87266 |
| P28867 | Prkcd   | Protein kinase C delta type                                                    | 208.842  | 17.8  | 77547  | 9  | 119460.3491 | 87404.82016 | 113772.1353 | 117303.799  | 113990.121  | 106155.9261 | 118251.2971 | 114622.055  | 112382.0836 | 122101.5579 | 108662.8504 | 73733.14407 | 119073.9489 | 121386.7601 | 95245.64127 |
| P29066 | Arrb1   | Beta-arrestin-1                                                                | 207.183  | 21.77 | 47020  | 7  | 78022.64456 | 88633.78078 | 79214.40762 | 82500.46948 | 86466.60446 | 72331.25649 | 72615.92431 | 67453.05387 | 71257.56921 | 65498.79664 | 72806.26903 | 65908.87229 | 75273.76433 | 82873.21372 | 74399.67488 |
| P29067 | Arrb2   | Beta-arrestin-2                                                                | 367.675  | 39.76 | 46340  | 11 | 164546.31   | 165950.7921 | 159366.5026 | 156624.1905 | 159255.3202 | 168843.4353 | 174107.9897 | 159360.0285 | 168270.0318 | 149035.5087 | 143867.551  | 143869.3549 | 151335.3356 | 167787.3987 | 172691.7552 |
| P29314 | Rps9    | 40S ribosomal protein S9                                                       | 270.149  | 44.85 | 22591  | 13 | 871313.8351 | 788713.381  | 822263.1546 | 700696.2453 | 923844.974  | 1021702.414 | 971923.3164 | 1038348.881 | 1035510.696 | 877155.6869 | 895855.4208 | 931048.5386 | 1006616.729 | 873367.1854 | 877641.5916 |
| P29341 | Pabpc1  | Polyadenylate-binding protein 1                                                | 1065.199 | 46.86 | 70671  | 26 | 709188.626  | 725754.3343 | 739722.0161 | 708362.8478 | 691330.1313 | 719866.8215 | 756605.399  | 722712.2625 | 716404.3978 | 695659.4022 | 769538.5218 | 713210.232  | 707218.9587 | 733514.5799 | 691595.787  |
| P29351 | Ptpn6   | Tyrosine-protein phosphatase non-receptor type 6                               | 1259.199 | 70.42 | 67559  | 36 | 1041504.999 | 1125985.022 | 1158329.183 | 1078        |             |             |             |             |             |             |             |             |             |             |             |

|        |         |                                                                                   |         |       |        |    |              |             |             |             |             |             |             |             |             |             |             |             |             |             |             |
|--------|---------|-----------------------------------------------------------------------------------|---------|-------|--------|----|--------------|-------------|-------------|-------------|-------------|-------------|-------------|-------------|-------------|-------------|-------------|-------------|-------------|-------------|-------------|
| P31266 | Rbpj    | Recombining binding protein suppressor of hairless                                | 94.601  | 7.22  | 58537  | 3  | 87533.37408  | 87023.36435 | 93910.61563 | 86717.39796 | 97345.20222 | 95254.12267 | 98804.50643 | 99780.46412 | 103599.8901 | 88116.71278 | 90378.46938 | 88831.86808 | 94150.76344 | 91268.42909 | 98182.40498 |
| P31750 | Akt1    | RAC-alpha serine/threonine-protein kinase                                         | 63.158  | 5.21  | 55707  | 2  | 10429.78085  | 11377.05889 | 10694.76046 | 11704.50065 | 11061.42203 | 9216.319031 | 10513.967   | 10550.53047 | 9865.373992 | 11867.97937 | 10457.28144 | 12780.02785 | 10986.71329 | 11349.78485 | 10900.00786 |
| P31938 | Map2k1  | Dual specificity mitogen-activated protein kinase kinase 1                        | 480.979 | 39.95 | 43474  | 11 | 151520.8787  | 157152.7987 | 152128.7422 | 141490.613  | 173557.6202 | 127616.9827 | 134377.9103 | 132987.3739 | 134454.3956 | 127764.1692 | 167020.3063 | 149778.0012 | 149904.7812 | 148689.3374 | 152200.861  |
| P31996 | Cd68    | Macrosialin CD68                                                                  | 137.842 | 16.87 | 34818  | 5  | 847693.2623  | 821643.5875 | 716359.4203 | 729747.7338 | 742959.8765 | 859681.0093 | 795964.5744 | 786611.4012 | 834496.0146 | 860294.0886 | 772058.7252 | 718728.7955 | 838701.1744 | 802406.813  | 905626.4074 |
| P32020 | Scp2    | Non-specific lipid-transfer protein                                               | 78.683  | 5.3   | 59126  | 3  | 79426.95404  | 86278.01703 | 65416.77269 | 67246.76892 | 76792.44981 | 64886.443   | 43302.8047  | 39982.55408 | 56233.53303 | 50995.69955 | 63970.14425 | 49543.4773  | 58031.74408 | 56308.97514 | 52139.19562 |
| P32067 | Ssb     | Lupus La protein homolog                                                          | 467.172 | 32.29 | 47756  | 13 | 321847.5466  | 305189.249  | 307609.1502 | 349324.7055 | 320476.6832 | 281428.6499 | 300963.6665 | 298532.5258 | 306603.3395 | 302003.8958 | 308330.6162 | 333728.982  | 307832.2152 | 325468.3817 | 303468.6526 |
| P32233 | Drg1    | Developmentally-regulated GTP-binding protein 1                                   | 186.528 | 19.89 | 40512  | 5  | 22331.74255  | 25073.43316 | 24928.9743  | 25902.48451 | 21178.86643 | 18578.8939  | 27809.86885 | 30941.71127 | 29382.84567 | 23236.70309 | 23879.36724 | 22990.70485 | 13881.34948 | 18546.56639 | 24332.59885 |
| P32577 | Csk     | Tyrosine-protein kinase CSK                                                       | 379.565 | 33.56 | 50746  | 12 | 111256.1426  | 102382.8802 | 101167.7097 | 104318.6626 | 104923.6806 | 92764.14567 | 91678.70832 | 96397.42062 | 97598.95389 | 96985.14004 | 96891.86201 | 107272.5255 | 107049.0308 | 100957.6783 | 99924.74732 |
| P32921 | Wars    | Tryptophan--tRNA ligase, cytoplasmic                                              | 342.969 | 29.73 | 54358  | 10 | 87427.28726  | 98066.28357 | 89703.97972 | 89321.5787  | 70348.04728 | 80172.54124 | 99711.21784 | 95246.19281 | 89510.49179 | 94386.15845 | 91881.05801 | 110293.7403 | 99435.41346 | 99670.11259 | 101995.805  |
| P33609 | Pola1   | DNA polymerase alpha catalytic subunit                                            | 28.801  | 2.87  | 167340 | 2  | 5135.273379  | 4867.209505 | 4306.025865 | 4845.784728 | 4536.868026 | 2892.219897 | 3882.534678 | 3425.155214 | 4884.578109 | 3571.840155 | 3206.630235 | 4804.483985 | 3739.917579 | 4455.37658  | 3995.176095 |
| P33611 | Pola2   | DNA polymerase alpha subunit B                                                    | 42.166  | 6.83  | 66214  | 2  | 8140.260636  | 8310.837737 | 8082.567389 | 5981.989364 | 7591.734249 | 6737.163277 | 6812.554371 | 8356.532601 | 6431.620598 | 7879.493296 | 7864.791506 | 8268.7156   | 7188.004714 | 7986.404806 | 7459.864565 |
| P34022 | Ranbp1  | Ran-specific GTPase-activating protein                                            | 104.906 | 35.47 | 23596  | 5  | 114958.1663  | 109654.2866 | 116325.7954 | 118573.2081 | 117619.1555 | 102447.7611 | 129762.4582 | 122030.9946 | 116113.0226 | 111888.8374 | 120521.6977 | 123600.4102 | 113581.4894 | 115935.5274 | 116650.4278 |
| P34884 | Mif     | Macrophage migration inhibitory factor                                            | 364.546 | 71.3  | 12504  | 8  | 401394.4982  | 341766.627  | 343561.3741 | 337389.9815 | 305590.9954 | 278252.6925 | 245459.5229 | 230377.1346 | 263141.5236 | 220172.3931 | 292495.3887 | 278395.2264 | 245761.2307 | 246844.516  | 184719.8363 |
| P34960 | Mmp12   | Macrophage metalloelastase                                                        | 124.013 | 12.26 | 54971  | 5  | 32006.70263  | 32104.78011 | 20548.53989 | 25036.66584 | 20757.08031 | 52248.96914 | 41840.64967 | 46870.33421 | 48401.14206 | 38066.06052 | 44183.64129 | 40111.12956 | 37870.80765 | 42418.13708 | 36213.88839 |
| P35123 | Usp4    | Ubiquitin carboxyl-terminal hydrolase 4                                           | 358.208 | 16.22 | 108343 | 12 | 51568.34604  | 54013.06059 | 42174.91957 | 49647.52651 | 52892.09892 | 47942.3896  | 43384.02061 | 52238.54391 | 55871.15225 | 46456.11658 | 42005.1533  | 46286.22841 | 36455.74822 | 54630.63562 | 43320.61878 |
| P35276 | Rab3d   | Ras-related protein Rab-3D                                                        | 80.876  | 11.87 | 24416  | 3  | 58983.41663  | 54893.74549 | 48042.02511 | 55518.81203 | 67863.61112 | 65666.14701 | 61902.71542 | 66175.23107 | 71341.04124 | 59381.31332 | 48205.29474 | 54083.62302 | 58528.697   | 57447.09289 | 55373.08571 |
| P35278 | Rab5c   | Ras-related protein Rab-5C                                                        | 510.872 | 58.8  | 23413  | 10 | 413151.0831  | 395009.361  | 387205.885  | 400086.3239 | 393951.9694 | 346599.695  | 387108.4247 | 377406.9646 | 396771.0951 | 387021.1876 | 404274.5294 | 378123.6271 | 380486.4517 | 405204.502  | 402500.3734 |
| P35279 | Rab6a   | Ras-related protein Rab-6A                                                        | 196.33  | 28.85 | 23590  | 5  | 57130.65671  | 63832.43011 | 54489.12625 | 57769.87776 | 56104.75312 | 60565.80347 | 60268.49983 | 60789.30932 | 63712.27951 | 64093.61583 | 68729.67059 | 60488.00386 | 63477.95175 | 63047.51546 | 61853.39682 |
| P35280 | Rab8a   | Ras-related protein Rab-8A                                                        | 324.08  | 44.93 | 23668  | 10 | 114906.1923  | 92005.67288 | 95754.33186 | 77769.10629 | 109114.8596 | 105326.7287 | 103678.9616 | 114871.5001 | 103175.1228 | 93134.17411 | 104644.1942 | 96412.39354 | 121976.6588 | 88589.19276 | 94131.57531 |
| P35282 | Rab21   | Ras-related protein Rab-21                                                        | 103.17  | 22.97 | 24106  | 4  | 21632.16677  | 23314.8709  | 25835.30747 | 25374.44447 | 22206.6454  | 14715.94727 | 24233.86652 | 26283.89301 | 22442.72673 | 21182.9667  | 23312.18509 | 23956.81394 | 22137.74129 | 24909.70539 | 19621.91813 |
| P35285 | Rab22a  | Ras-related protein Rab-22A                                                       | 73.206  | 22.16 | 21802  | 3  | 34711.13299  | 33617.97033 | 29779.92376 | 30305.75377 | 36030.89564 | 28900.58846 | 26219.20634 | 29841.32142 | 29343.13966 | 28837.80505 | 26251.15037 | 29749.83425 | 30037.30764 | 31197.40527 | 33845.49197 |
| P35286 | Rab13   | Ras-related protein Rab-13                                                        | 40.06   | 12.81 | 22901  | 3  | 63762.85987  | 52372.45878 | 51522.92593 | 54181.00022 | 57519.40114 | 59346.69218 | 57830.31215 | 63593.736   | 59164.73914 | 62578.75759 | 66782.58627 | 54068.75116 | 57992.6498  | 55520.49609 | 51529.15875 |
| P35293 | Rab18   | Ras-related protein Rab-18                                                        | 80.318  | 18.93 | 23035  | 3  | 8883.651403  | 10849.1569  | 8617.629248 | 8225.590366 | 10949.84739 | 15499.80422 | 13246.80861 | 14203.1178  | 14683.58827 | 13584.23377 | 9531.331516 | 10850.10114 | 11772.55421 | 12140.42704 | 12691.83156 |
| P35434 | Atp5f1d | ATP synthase subunit delta, mitochondrial                                         | 85.494  | 28.57 | 17595  | 3  | 109105.2932  | 32361.43337 | 110720.2982 | 87468.6214  | 71595.68776 | 104718.6379 | 92556.24846 | 33360.32628 | 101582.5445 | 89537.80356 | 108712.867  | 87077.46913 | 87467.8637  | 84520.20547 | 79825.30075 |
| P35505 | Fah     | Fumarylacetoacetase                                                               | 102.778 | 9.31  | 46176  | 1  | 11898.57245  | 22341.43108 | 22426.76523 | 21300.9658  | 14628.19905 | 18810.40023 | 12282.58498 | 20307.40175 | 14896.83588 | 19848.36223 | 21514.09366 | 16882.20782 | 11615.80425 | 16370.30567 | 25172.82864 |
| P35564 | Canx    | Calinein                                                                          | 771.865 | 29.1  | 67278  | 17 | 388870.5937  | 386615.1703 | 367497.7603 | 367987.241  | 374049.335  | 472574.3201 | 444755.0533 | 454753.8483 | 473423.1474 | 473101.1905 | 383442.8286 | 408923.005  | 429925.21   | 401461.0398 | 401837.0581 |
| P35585 | Ap1m1   | AP-1 complex subunit mu-1                                                         | 12.778  | 15.37 | 48543  | 5  | 43590.49539  | 41221.90748 | 39386.87804 | 17325.43109 | 40687.11184 | 34727.80202 | 40470.61734 | 29503.28924 | 42208.61169 | 42473.90018 | 42541.74095 | 41478.0904  | 46030.82021 | 51046.83894 | 36406.08966 |
| P35700 | Prdx1   | Peroxiredoxin-1                                                                   | 593.265 | 64.82 | 22176  | 20 | 2205034.841  | 2258420.958 | 2224902.868 | 2187989.53  | 2232499.53  | 2630003.367 | 2578725.535 | 2547737.283 | 2620800.357 | 2499457.002 | 2555874.66  | 2496023.888 | 2537582.409 | 2467131.324 | 2306040.188 |
| P35922 | Fmr1    | Synaptic functional regulator FMR1                                                | 106.209 | 6.51  | 68989  | 3  | 39571.95937  | 33354.41258 | 37374.44399 | 32652.90515 | 34219.26734 | 36515.42674 | 37845.68676 | 37600.40465 | 39595.54302 | 38436.35838 | 34380.73905 | 32372.26458 | 37973.85142 | 38345.48074 | 37661.56754 |
| P35979 | Rpl12   | 60S ribosomal protein L12                                                         | 358.578 | 58.79 | 17805  | 7  | 620494.5819  | 646830.7255 | 603865.047  | 599613.9552 | 655884.3428 | 650830.7488 | 619855.9714 | 605742.235  | 564828.7492 | 569881.8323 | 584131.6691 | 592725.6658 | 576467.7457 | 575717.0523 | 621040.1011 |
| P35991 | Btk     | Tyrosine-protein kinase BTK                                                       | 95.635  | 3.03  | 76437  | 3  | 58494.289465 | 43782.92334 | 14504.6117  | 38088.04738 | 33941.10259 | 26489.01006 | 32105.30409 | 34367.57684 | 42704.56585 | 32933.53276 | 5628.974782 | 38590.8627  | 22816.30596 | 4921.054592 | 421.823714  |
| P36371 | Tap2    | Antigen peptide transporter 2                                                     | 125.645 | 7.69  | 77445  | 4  | 16575.79217  | 21245.61814 | 10744.66018 | 28752.57922 | 23799.3049  | 33245.68757 | 28645.8729  | 21558.13574 | 14509.24312 | 30126.91609 | 10779.59391 | 30984.06896 | 28724.65669 | 26503.60453 | 19556.55168 |
| P36506 | Map2k2  | Dual specificity mitogen-activated protein kinase kinase 2                        | 178.952 | 24.75 | 44282  | 8  | 97626.55282  | 96717.5343  | 98153.60796 | 88827.32958 | 119230.0722 | 89609.66348 | 91819.78346 | 86900.34493 | 93266.50385 | 86654.05636 | 113910.0019 | 93913.96705 | 95078.39042 | 91750.74023 | 100609.861  |
| P36536 | Sar1a   | GTP-binding protein SAR1a                                                         | 121.468 | 27.27 | 22371  | 3  | 7633.222725  | 7251.516778 | 6539.004983 | 6785.529916 | 5861.205884 | 4614.056749 | 5644.679652 | 7437.40224  | 6863.69303  | 1106.544357 | 5038.667743 | 5950.118779 | 1144.738928 | 5009.375338 | 4591.781982 |
| P36552 | Cpox    | Oxygen-dependent coproporphyrinogen-III oxidase, mitochondrial                    | 58.206  | 7.45  | 49715  | 2  | 4976.339017  | 5981.715792 | 4596.213245 | 6193.350012 | 4395.232037 | 3498.577005 | 2688.871529 | 4106.340998 | 3789.934665 | 3594.717576 | 5659.808184 | 4847.00282  | 5942.342985 | 4223.296399 | 4645.626984 |
| P36860 | Ralb    | Ras-related protein Rab-B                                                         | 252.646 | 23.3  | 23317  | 7  | 64769.98543  | 78384.03797 | 45275.82786 | 78059.86696 | 77771.55733 | 57192.83536 | 58204.71171 | 53282.19756 | 62073.86891 | 67375.64994 | 85848.47927 | 73596.7749  | 78199.20768 | 79063.01808 | 66368.60107 |
| P36876 | Ppp2r2a | Serine/threonine-protein phosphatase 2A 55 kDa regulatory subunit B alpha isoform | 291.297 | 21.92 | 51678  | 8  | 99527.83167  | 106189.9818 | 114684.3837 | 113471.6441 | 106068.4029 | 117733.7285 | 123081.2422 | 130067.3641 | 124616.537  | 114441.2916 | 108078.1975 | 112476.4251 | 110744.4485 | 111513.2796 | 108121.2045 |
| P36916 | Gnl1    | Guanine nucleotide-binding protein-like 1                                         | 100.222 | 6.43  | 68771  | 3  | 14485.54206  | 13608.89508 | 12087.95148 | 12983.09121 | 13244.18843 | 12250.16719 | 14195.17296 | 12793.44575 | 14803.49927 | 12266.60928 | 10597.00855 | 11230.3207  | 16185.21878 | 12942.77854 | 13369.25129 |
| P37040 | Por     | NADPH--cytochrome P450 reductase                                                  | 191.7   | 19.17 | 77044  | 9  | 80717.92107  | 87521.09231 | 83672.94223 | 88574.4364  | 85550.42492 | 89831.21368 | 94789.02962 | 92441.04404 | 91910.93514 | 79656.34278 | 93107.64637 | 90030.99071 | 88121.34504 | 90170.49132 | 85862.69886 |
| P37913 | Lig1    | DNA ligase 1                                                                      | 423.733 | 18.56 | 102290 | 11 | 77901.3637   | 85607.03733 | 94133.5281  | 78295.53681 | 86856.67861 | 87359.      |             |             |             |             |             |             |             |             |             |

|        |         |                                                                                  |          |       |        |    |             |             |             |             |             |             |             |             |              |             |             |             |             |             |             |
|--------|---------|----------------------------------------------------------------------------------|----------|-------|--------|----|-------------|-------------|-------------|-------------|-------------|-------------|-------------|-------------|--------------|-------------|-------------|-------------|-------------|-------------|-------------|
| P41498 | Acp1    | Low molecular weight phosphotyrosine protein phosphatase                         | 157.634  | 24.05 | 18152  | 3  | 71540.28409 | 66287.49274 | 65201.19237 | 44585.71469 | 69908.94005 | 43708.98523 | 64456.13289 | 58783.43163 | 58791.15103  | 39596.30357 | 50054.93355 | 69703.08394 | 71803.09092 | 70231.87491 | 66680.01448 |
| P41565 | Idh3g   | Isocitrate dehydrogenase [NAD] subunit gamma 1, mitochondrial                    | 188.881  | 21.63 | 42851  | 6  | 66681.67882 | 71470.75734 | 62607.10562 | 64038.24914 | 70945.32171 | 77309.50934 | 74037.16576 | 73613.54286 | 77873.97875  | 65270.78068 | 56739.03904 | 58345.60072 | 55552.37978 | 61266.89617 | 64897.06966 |
| P42082 | Cd86    | T-lymphocyte activation antigen CD86                                             | 79.02    | 10.68 | 34666  | 3  | 60447.65496 | 53914.11016 | 54687.56969 | 48781.6551  | 52439.08852 | 67337.94769 | 69593.14134 | 64194.54323 | 61205.49027  | 69438.48735 | 56407.34144 | 50082.47792 | 68320.79077 | 60669.92691 | 59274.2488  |
| P42125 | Eci1    | Enoyl-CoA delta isomerase 1, mitochondrial                                       | 293.464  | 37.72 | 32250  | 8  | 153728.0868 | 158000.3035 | 126227.8733 | 111838.3531 | 140363.2367 | 126925.6443 | 141385.7435 | 127342.3743 | 139625.3844  | 149899.7757 | 160238.5897 | 141118.1884 | 165534.2126 | 149997.6976 | 144097.0985 |
| P42208 | Sept2   | Septin-2                                                                         | 454.811  | 50.14 | 41526  | 11 | 240634.5483 | 302625.3178 | 263036.167  | 249265.5619 | 260506.7359 | 255244.7975 | 264207.322  | 288498.3535 | 259598.4328  | 272844.9677 | 269763.429  | 284565.217  | 293633.6275 | 258491.0384 | 274684.1205 |
| P42225 | Stat1   | Signal transducer and activator of transcription 1                               | 225.904  | 10.55 | 87197  | 6  | 28022.80977 | 16771.50394 | 25780.99634 | 20948.58907 | 22077.08219 | 33751.3309  | 23088.20288 | 34298.17628 | 32674.2938   | 20948.73787 | 13561.77166 | 27055.0893  | 16728.47426 | 30040.16916 | 23011.69753 |
| P42227 | Stat3   | Signal transducer and activator of transcription 3                               | 196.162  | 14.29 | 88054  | 6  | 26189.88148 | 32764.59331 | 18233.21735 | 29357.19798 | 28092.38951 | 12967.53821 | 21135.29633 | 34656.92691 | 16083.52265  | 18307.48634 | 25167.57106 | 24248.34805 | 23458.9087  | 28040.4583  | 18408.29504 |
| P42346 | Mtor    | Serine/threonine-protein kinase mTOR                                             | 86.655   | 2.28  | 288794 | 4  | 7498.400287 | 5905.048476 | 4482.734396 | 4890.135635 | 5027.794457 | 4121.690578 | 4500.043279 | 4585.1592   | 4471.828523  | 4320.682748 | 6277.872882 | 5173.701943 | 16093.0119  | 5426.029935 | 5086.676758 |
| P42667 | Sec11a  | Signal peptidase complex catalytic subunit SEC11A                                | 70.665   | 16.2  | 20599  | 4  | 44711.07034 | 41038.39412 | 41960.47568 | 45155.3136  | 43660.67607 | 57441.27327 | 51844.56838 | 55117.32857 | 55075.44914  | 54277.0843  | 45703.84756 | 48485.17087 | 50363.41238 | 52443.84763 | 49475.16989 |
| P42669 | Pura    | Transcriptional activator protein Pur-alpha                                      | 180.048  | 23.68 | 34884  | 5  | 49930.04256 | 68913.73065 | 73285.71586 | 65490.63097 | 64080.26136 | 56254.7275  | 74610.6536  | 61456.2434  | 56183.01843  | 76346.52942 | 70276.40993 | 61120.84118 | 50962.55714 | 48711.5344  | 60899.75766 |
| P42932 | Cct8    | T-complex protein 1 subunit theta                                                | 1318.426 | 61.86 | 59555  | 32 | 1006932.541 | 1079858.884 | 1130846.054 | 1045364.662 | 1062158.121 | 1180823.071 | 1235372.183 | 1262936.64  | 1144391.002  | 1080583.34  | 1050088.637 | 1119871.257 | 1067529.514 | 1127274.67  | 1087329.301 |
| P43247 | Msh2    | DNA mismatch repair protein Msh2                                                 | 478.624  | 18.93 | 104151 | 13 | 59481.13871 | 84647.54071 | 62844.96767 | 71285.83302 | 72835.60793 | 65670.22542 | 63988.69375 | 69138.92041 | 75661.49248  | 57489.18743 | 55553.59607 | 70811.88857 | 72497.28545 | 64809.43011 | 74328.97022 |
| P43883 | Plin2   | Perilipin-2                                                                      | 41.644   | 6.35  | 46646  | 2  | 2862.46571  | 3099.207889 | 3201.594263 | 3710.156495 | 2360.914013 | 10370.13754 | 5882.534046 | 14181.61047 | 15895.60786  | 5402.315625 | 4689.272033 | 8590.821611 | 3705.078732 | 7312.421931 | 4161.43457  |
| P45376 | Akr1b1  | Aldose reductase                                                                 | 575.159  | 56.65 | 35732  | 20 | 1388197.913 | 1424876.979 | 1389402.603 | 1378776.1   | 1440627.996 | 1232236.035 | 1275814.028 | 1257179.355 | 1274101.423  | 1152637.878 | 1363924.349 | 1390569.754 | 1266539.02  | 1416766.965 | 1337986.652 |
| P45377 | Akr1b6  | Aldose reductase-related protein 2                                               | 465.668  | 55.7  | 36121  | 16 | 568552.4476 | 560424.4997 | 537070.43   | 501679.7013 | 527493.434  | 567008.6307 | 559515.4491 | 577958.7401 | 561341.0971  | 512283.5326 | 509674.0814 | 514662.081  | 510380.7989 | 526913.7961 | 554295.6449 |
| P45878 | Fkbp2   | Peptidyl-prolyl cis-trans isomerase FKBP2                                        | 130.253  | 30.71 | 15344  | 2  | 12292.46687 | 9824.060104 | 7654.866602 | 9439.827292 | 8929.925646 | 7658.324999 | 10184.0953  | 95709.8552  | 11880.68657  | 27300.6788  | 10102.43428 | 10013.20602 | 9906.760147 | 8979.826379 | 10742.37153 |
| P45952 | Acadm   | Medium-chain specific acyl-CoA dehydrogenase, mitochondrial                      | 283.311  | 25.89 | 46481  | 8  | 157402.2314 | 166453.4508 | 139334.7744 | 152510.7487 | 148988.8919 | 159572.6847 | 153390.7077 | 153996.6299 | 151207.0932  | 156393.3402 | 172410.4427 | 160332.2185 | 161364.3064 | 161079.3929 | 155783.3377 |
| P46061 | Rangap1 | Ran GTPase-activating protein 1                                                  | 236.691  | 19.02 | 63531  | 6  | 25548.81551 | 38497.69091 | 24143.76181 | 29266.60353 | 26883.80935 | 29917.82918 | 21593.53586 | 27558.56708 | 35254.79472  | 26625.58175 | 25436.39192 | 29450.117   | 28000.20566 | 32194.09164 | 24551.1622  |
| P46062 | Sipa1   | Signal-induced proliferation-associated protein 1                                | 62.107   | 4.92  | 112066 | 3  | 9620.672436 | 11297.47391 | 9173.998648 | 10755.78666 | 10503.85471 | 9334.176828 | 11475.45476 | 9768.066257 | 8593.697995  | 9543.409419 | 9978.323271 | 10067.69616 | 10524.53466 | 10233.71928 | 11056.84644 |
| P46413 | Gss     | Glutathione synthetase                                                           | 90.551   | 11.6  | 52345  | 4  | 19642.55559 | 21252.37326 | 20333.9914  | 20354.51708 | 27530.47436 | 13867.27641 | 9100.353821 | 17553.50753 | 136383.89348 | 19654.30043 | 17179.22925 | 16726.26845 | 20690.9659  | 20661.32189 | 20143.63893 |
| P46460 | Nsf     | Vesicle-fusing ATPase                                                            | 751.067  | 32.53 | 82613  | 21 | 302632.0119 | 338094.8927 | 316006.2361 | 357751.0421 | 292728.8229 | 336766.1378 | 328110.9965 | 305709.8552 | 334193.2885  | 333711.4285 | 316026.7925 | 325509.3924 | 328839.4773 | 309748.7868 | 306503.5916 |
| P46462 | Vcp     | Transitional endoplasmic reticulum ATPase                                        | 1627.367 | 63.28 | 89349  | 43 | 1236682.899 | 1298652.033 | 1178802.97  | 1256048.831 | 1199860.586 | 1033930.386 | 1225597.921 | 1094622.52  | 1149565.108  | 1089240.715 | 1192705.267 | 1271033.364 | 1086801.282 | 1185399.612 | 1207292.814 |
| P46467 | Vps4b   | Vacuolar protein sorting-associated protein 4B                                   | 260.717  | 23.65 | 49419  | 9  | 105067.5775 | 98706.16982 | 103746.0005 | 122403.7672 | 118518.6214 | 119387.6089 | 92726.79123 | 95351.9791  | 116820.372   | 111622.9931 | 99632.11891 | 111504.6915 | 108985.6523 | 119710.5549 | 94531.35271 |
| P46471 | Psmc2   | 26S proteasome regulatory subunit 7                                              | 451.861  | 44.11 | 48648  | 15 | 153468.7762 | 184504.6799 | 162572.7333 | 159442.7091 | 166891.238  | 170862.5918 | 180132.7361 | 175056.7527 | 137702.3254  | 141510.3623 | 168579.2521 | 170437.1464 | 154267.7108 | 177385.0916 | 163093.0468 |
| P46664 | Adss    | Adenylosuccinate synthetase isozyme 2                                            | 471.809  | 35.53 | 50021  | 12 | 106395.1353 | 122381.386  | 108875.1935 | 122969.184  | 109948.5293 | 105169.03   | 119375.354  | 130125.6452 | 119961.3397  | 109755.7627 | 105612.4201 | 113340.0977 | 105732.2762 | 107538.5342 | 110316.1312 |
| P46737 | Brcc3   | Lys-63-specific deubiquitinase BRCC36                                            | 120.438  | 14.78 | 33340  | 3  | 19565.68048 | 20884.62811 | 20622.24413 | 21674.90838 | 22162.11928 | 18028.97506 | 22806.85216 | 17098.82473 | 16864.60637  | 20298.41471 | 18958.08772 | 20900.93287 | 19934.32305 | 18112.3821  | 21536.09965 |
| P46978 | Stt3a   | Dolichyl-diphosphoglycerol-saccharide--protein glycosyltransferase subunit STT3A | 246.339  | 18.44 | 80598  | 11 | 103439.3636 | 117572.2039 | 102742.7803 | 102923.1141 | 100679.2695 | 134838.1886 | 124961.0875 | 117650.3619 | 132947.6577  | 125738.1954 | 107043.8059 | 109389.2199 | 120317.8035 | 99964.26149 | 118034.2583 |
| P47197 | Akt2    | RAC-beta serine/threonine-protein kinase                                         | 39.141   | 3.33  | 55543  | 2  | 3958.240599 | 3742.844171 | 5167.034772 | 4136.57989  | 4842.857229 | 3487.86728  | 4111.923391 | 4214.378611 | 2476.574185  | 3433.91941  | 4755.710807 | 4216.690187 | 4613.666666 | 4530.712674 | 5239.064242 |
| P47199 | Cryz    | Quinone oxidoreductase                                                           | 56.587   | 9.97  | 35269  | 2  | 22882.62043 | 26512.87659 | 22463.61141 | 19147.65487 | 19328.81221 | 20600.82749 | 18598.24985 | 20840.27691 | 17821.06535  | 18603.69732 | 21847.02036 | 18135.51943 | 21316.89875 | 20961.09968 | 21254.91405 |
| P47226 | Tes     | Testin                                                                           | 241.991  | 30.5  | 47983  | 8  | 86354.12068 | 71274.56559 | 75882.50819 | 101849.7832 | 70489.97208 | 66638.15441 | 89765.12086 | 72145.10895 | 73039.38544  | 76682.15151 | 78085.96831 | 63521.05636 | 63597.11351 | 75234.70883 | 70956.78411 |
| P47713 | Pla2g4a | Cytosolic phospholipase A2                                                       | 413.173  | 26.07 | 85222  | 13 | 130722.2104 | 138157.0389 | 120746.0716 | 139694.4249 | 142948.4667 | 122217.3519 | 146811.5889 | 145472.4887 | 148507.3141  | 125814.4801 | 126174.0187 | 146445.9175 | 123053.2454 | 134094.1108 | 134205.0038 |
| P47738 | Aldh2   | Aldehyde dehydrogenase, mitochondrial                                            | 996.969  | 62.62 | 56538  | 25 | 793715.0113 | 785429.5986 | 734327.8388 | 786447.2383 | 756560.8514 | 814239.1926 | 738122.1978 | 719269.7785 | 811527.6228  | 800100.9631 | 749229.0337 | 740667.3369 | 794393.603  | 763123.1357 | 780932.9913 |
| P47740 | Aldh3a2 | Fatty aldehyde dehydrogenase                                                     | 180.153  | 17.56 | 53971  | 7  | 36681.26215 | 34287.05884 | 33946.44922 | 30589.7668  | 36787.15147 | 40681.70812 | 35458.50136 | 30796.6127  | 40309.65306  | 39272.19012 | 43257.08386 | 43119.12542 | 36883.61695 | 41132.3775  | 33176.49396 |
| P47753 | Capza1  | F-actin-capping protein subunit alpha-1                                          | 366.653  | 55.94 | 32940  | 11 | 504879.5592 | 519825.1567 | 499250.3251 | 503365.0934 | 510819.2458 | 437325.8333 | 485327.5455 | 454978.6962 | 451747.823   | 466040.0528 | 477555.7947 | 494522.1465 | 524923.3024 | 541378.6671 | 533864.0744 |
| P47754 | Capza2  | F-actin-capping protein subunit alpha-2                                          | 660.331  | 70.28 | 32967  | 14 | 540284.7193 | 549555.8563 | 523091.8023 | 529975.0139 | 540276.4526 | 446637.3244 | 513903.594  | 501390.4646 | 462481.4472  | 489341.3755 | 502095.1898 | 487402.9293 | 553094.6541 | 567568.9452 | 563398.4313 |
| P47757 | Capzb   | F-actin-capping protein subunit beta                                             | 867.592  | 66.79 | 31345  | 21 | 489360.7092 | 511178.2301 | 434624.5778 | 471727.6472 | 479991.1297 | 366934.9421 | 362326.1238 | 362791.4046 | 374227.966   | 355511.5128 | 432139.993  | 491508.6122 | 461482.6985 | 439731.6026 | 414627.6555 |
| P47758 | Srprb   | Signal recognition particle receptor subunit beta                                | 192.735  | 18.22 | 29579  | 3  | 20321.01437 | 26198.74708 | 20597.56589 | 22589.90252 | 21876.90788 | 24747.92906 | 25893.68512 | 28607.5826  | 25483.24067  | 22456.96266 | 23228.11407 | 24136.7412  | 22381.02702 | 21882.76891 | 24559.25109 |
| P47791 | Gsr     | Glutathione reductase, mitochondrial                                             | 264.542  | 25.8  | 53663  | 7  | 158738.8463 | 154395.3302 | 148312.0414 | 149466.0524 | 151390.2727 | 142899.6205 | 156838.2288 | 150124.5024 | 150301.5279  | 139363.8275 | 145803.3267 | 143803.9894 | 136273.3918 | 143589.6847 | 142754.9273 |
| P47802 | Mtx1    | Metaxin-1                                                                        | 109.481  | 12.62 | 35624  | 3  | 12270.58173 | 12729.06568 | 10633.04466 | 13900.44231 | 6781.015168 | 9693.552543 | 10755.39745 | 13655.29918 | 13850.32999  | 13173.23528 | 10948.09602 | 10362.10139 | 10437.40406 | 13010.83464 | 11886.0644  |
| P47811 | Mapk14  | Mitogen-activated protein kinase 14                                              | 242.495  | 36.94 | 41287  | 8  | 61429.459   |             |             |             |             |             |             |             |              |             |             |             |             |             |             |

|        |          |                                                                  |          |       |        |    |             |              |             |             |             |              |             |             |             |             |             |             |             |              |             |
|--------|----------|------------------------------------------------------------------|----------|-------|--------|----|-------------|--------------|-------------|-------------|-------------|--------------|-------------|-------------|-------------|-------------|-------------|-------------|-------------|--------------|-------------|
| P48025 | Syk      | Tyrosine-protein kinase SYK                                      | 114.19   | 10.81 | 71376  | 4  | 8072.583069 | 14322.66707  | 11619.32177 | 11646.26987 | 12844.79349 | 8903.898726  | 11750.52394 | 8828.337218 | 5409.943048 | 6959.531257 | 8379.419986 | 14170.38107 | 13385.06453 | 6476.846761  | 7970.551465 |
| P48036 | Anxa5    | Annexin A5                                                       | 1571.408 | 83.39 | 35752  | 38 | 5574873.479 | 5496021.557  | 5094108.873 | 5311873.889 | 5111634.684 | 5718685.048  | 5792282.358 | 5924580.422 | 5822760.664 | 5865091.859 | 5857922.629 | 5982034.421 | 5998937.483 | 6156422.665  | 6043348.731 |
| P48193 | Epb41    | Protein A.1                                                      | 155.158  | 8.62  | 95911  | 5  | 47369.69029 | 50306.86056  | 54455.06172 | 54377.95884 | 51153.89624 | 40423.99745  | 48019.19325 | 52396.62969 | 40119.16149 | 43485.72822 | 49833.52824 | 54134.39293 | 50129.11161 | 50003.45479  | 46439.70768 |
| P48410 | Abcd1    | ATP-binding cassette sub-family D member 1                       | 41.003   | 5.03  | 81859  | 2  | 5718.81156  | 2294.911012  | 1841.544829 | 7240.448756 | 5908.156996 | 7167.819413  | 6000.744074 | 6159.57128  | 5477.431785 | 5979.255411 | 4999.588288 | 5410.124372 | 6201.839922 | 6968.520865  | 1949.930286 |
| P48441 | Idua     | Alpha-L-iduronidase                                              | 73.994   | 3.31  | 71254  | 2  | 5524.020701 | 5406.639453  | 4309.623276 | 5019.397755 | 4517.101795 | 3841.350959  | 3819.495718 | 3641.933436 | 3254.537554 | 4192.027658 | 3493.898283 | 4828.131141 | 4978.824618 | 5244.102396  | 5788.491692 |
| P48678 | Lmna     | Prelamin-A/C                                                     | 1621.487 | 59.85 | 74238  | 47 | 2832693.434 | 2705449.507  | 2389153.598 | 2414607.941 | 2577206.215 | 2593459.384  | 2511151.524 | 2475488.443 | 2446144.036 | 2711995.396 | 2883235.762 | 2456646.257 | 2712312.23  | 2692986.691  | 2532066.94  |
| P48758 | Cbr1     | Carbonyl reductase [NADPH] 1                                     | 110.481  | 25.99 | 30641  | 4  | 11401.85707 | 10400.08836  | 11687.97148 | 8401.446829 | 8803.017847 | 5913.621768  | 7898.86353  | 7297.277625 | 3506.823145 | 8387.839914 | 9456.602394 | 4990.207289 | 9802.556742 | 8656.726895  | 8142.443106 |
| P48771 | Cox7a2   | Cytochrome c oxidase subunit 7A2, mitochondrial                  | 84.488   | 27.71 | 9291   | 2  | 33067.09782 | 36109.87328  | 37436.9931  | 32763.84341 | 36716.66436 | 36188.23763  | 30028.55007 | 27957.92316 | 35702.83462 | 39486.56188 | 44563.15475 | 35637.48377 | 30998.42403 | 37299.9642   | 30417.35442 |
| P48774 | Gstm5    | Glutathione S-transferase Mu 5                                   | 104.255  | 27.23 | 26635  | 5  | 76102.54385 | 74671.26998  | 69671.02952 | 76640.37729 | 64013.9981  | 66020.67821  | 61851.11115 | 64700.03449 | 70517.64905 | 69624.05753 | 67825.446   | 68877.8318  | 68584.09951 | 69293.30957  | 74954.91033 |
| P48962 | Slc25a4  | ADP/ATP translocase 1                                            | 705.604  | 58.39 | 32904  | 22 | 2888003.101 | 2578678.978  | 2855141.379 | 2655645.528 | 2532936.655 | 3282575.621  | 3178345.704 | 3256407.534 | 3083208.806 | 3097823.242 | 2785614.524 | 2687891.044 | 2783705.442 | 2965831.895  | 2749786.04  |
| P48999 | Alox5    | Arachidonate 5-lipoxygenase                                      | 576.016  | 30.27 | 77967  | 16 | 225251.2847 | 192218.5708  | 203566.9823 | 228473.8813 | 262766.4399 | 175337.6658  | 160150.9046 | 160745.2484 | 216559.8496 | 212151.8157 | 180209.8063 | 167536.6816 | 190734.3597 | 226055.3964  | 212074.4858 |
| P49186 | Mapk9    | Mitogen-activated protein kinase 9                               | 56.326   | 4.96  | 48017  | 2  | 26393.76503 | 25266.57536  | 31203.50848 | 28916.60441 | 31430.95134 | 30293.67391  | 31336.28434 | 31996.2796  | 33252.15459 | 30582.91604 | 28963.3836  | 28523.22994 | 28270.28195 | 32994.56842  | 29839.49701 |
| P49242 | Rps3a    | 40S ribosomal protein S3a                                        | 727.985  | 57.58 | 29945  | 20 | 1083636.669 | 1110727.697  | 937474.4352 | 1086150.614 | 1212456.035 | 1147364.55   | 1212069.921 | 1181991.384 | 1054458.703 | 1103664.666 | 904945.8165 | 1047413.764 | 1048886.786 | 895036.4254  | 924118.5079 |
| P49300 | Clec10a  | C-type lectin domain family 10 member A                          | 363.302  | 46.05 | 34596  | 10 | 327689.2319 | 325165.3398  | 271385.9887 | 292427.0501 | 329697.0835 | 282326.2208  | 267192.0964 | 248712.6837 | 258818.7644 | 273859.3532 | 256460.9251 | 266585.5056 | 299397.8779 | 307867.5994  | 332068.6242 |
| P49442 | Inpp1    | Inositol polyphosphate 1-phosphatase                             | 154.202  | 11.87 | 43346  | 3  | 9735.588171 | 13744.87771  | 9216.002765 | 15250.96642 | 13036.41883 | 8776.548258  | 13686.17658 | 10131.34037 | 11352.47491 | 11713.62838 | 12059.51997 | 13152.22389 | 12531.53958 | 12548.63122  | 9830.333694 |
| P49615 | Cdk5     | Cyclin-dependent-like kinase 5                                   | 54.739   | 9.25  | 33288  | 3  | 10638.17346 | 9338.403787  | 8597.538359 | 7903.976361 | 8352.762541 | 8123.937576  | 9236.323672 | 7887.291683 | 8795.221701 | 7760.500736 | 9059.769009 | 8447.736017 | 8966.105827 | 10252.07404  | 8909.387193 |
| P49710 | Hcls1    | Hematopoietic lineage cell-specific protein                      | 322.005  | 24.69 | 54240  | 10 | 139127.0161 | 142703.896   | 128709.7906 | 129538.4181 | 135306.3991 | 175869.3717  | 170139.6594 | 128732.9405 | 123613.4105 | 122480.5572 | 136168.8482 | 125793.8097 | 174996.3532 | 129176.6629  | 123167.9898 |
| P49717 | Mcm4     | DNA replication licensing factor MCM4                            | 823.128  | 32.48 | 96736  | 22 | 255697.5112 | 270464.7838  | 270443.0804 | 282847.759  | 271316.446  | 205171.0951  | 217216.0435 | 229738.3065 | 220709.5021 | 212721.2404 | 265645.4639 | 254713.6527 | 225763.5616 | 237138.9262  | 256873.5283 |
| P49718 | Mcm5     | DNA replication licensing factor MCM5                            | 742.669  | 38.74 | 82343  | 21 | 417834.8294 | 411009.1639  | 432411.2396 | 475239.3362 | 449111.2694 | 442170.0583  | 415588.5008 | 442770.2255 | 473600.7248 | 454056.4668 | 440687.5449 | 434464.2671 | 416989.2563 | 456281.6721  | 433756.5486 |
| P49793 | Nup98    | Nuclear pore complex protein Nup98-Nup96                         | 83.503   | 3.85  | 197283 | 5  | 17402.08848 | 16104.62177  | 15322.86402 | 15683.44013 | 15042.50457 | 14675.77562  | 16399.29069 | 16162.26615 | 16210.63686 | 16700.82371 | 15367.66711 | 16499.96626 | 16453.24444 | 14968.09481  | 15396.48696 |
| P49813 | Tmod1    | Tropomodulin-1                                                   | 39.829   | 6.96  | 40466  | 2  | 9628.270485 | 6550.701552  | 5635.174724 | 8585.707507 | 7231.177979 | 6876.303269  | 6157.974478 | 7068.403897 | 6911.931421 | 7242.516097 | 10647.57025 | 8844.017311 | 9152.434694 | 9061.314636  | 8006.026205 |
| P50171 | Hsd17b8  | Estradiol 17-beta-dehydrogenase 8                                | 113.905  | 14.67 | 26588  | 3  | 42837.77059 | 40519.6729   | 39736.49827 | 40361.89872 | 38956.25751 | 39121.853    | 38162.07937 | 36186.87393 | 40605.29729 | 41523.82453 | 42914.78107 | 37781.83873 | 41286.56314 | 40455.696032 | 37594.13677 |
| P50247 | Ahcy     | Adenosylhomocysteinase                                           | 813.817  | 58.33 | 47688  | 23 | 100923.742  | 1035375.182  | 958438.1733 | 995632.7754 | 1001827.203 | 846790.0813  | 905941.2702 | 885730.2359 | 879678.9882 | 847177.9136 | 989722.9711 | 993483.3789 | 986184.7593 | 1024472.911  | 1012521.622 |
| P50396 | Gdi1     | Rab GDP dissociation inhibitor alpha                             | 659.795  | 46.31 | 50522  | 16 | 273039.0868 | 291239.4355  | 265625.2801 | 275107.4025 | 276283.7808 | 127826.3122  | 138665.1277 | 248771.1175 | 240217.6469 | 238922.6341 | 248874.1158 | 275518.0204 | 269222.1165 | 263091.1694  | 262602.4657 |
| P50399 | Gdi2     | Rab GDP dissociation inhibitor beta                              | 1482.039 | 80    | 50537  | 37 | 1086323.916 | 1133474.233  | 994410.9197 | 1058344.342 | 1046434.936 | 767213.3519  | 855547.7401 | 957196.2185 | 937096.8261 | 905707.7207 | 996367.0618 | 1051231.755 | 1041277.545 | 1059553.056  | 1052613.783 |
| P50408 | Atp6v1f  | V-type proton ATPase subunit F                                   | 178.96   | 57.98 | 13370  | 5  | 10747.93849 | 9334.911712  | 9017.439255 | 11069.74449 | 8454.139706 | 8434.931091  | 2148.453896 | 6223.886335 | 8735.095492 | 7350.561994 | 11418.68669 | 9779.881143 | 9474.550377 | 2217.26147   | 8541.304901 |
| P50428 | Arsa     | Arylsulfatase A                                                  | 16.653   | 8.89  | 53748  | 2  | 1177.976751 | 963.1616286  | 983.4723463 | 819.5440822 | 614.5203232 | 336.8241952  | 533.2008755 | 574.3375386 | 0.012083387 | 737.5985568 | 790.0857898 | 800.401921  | 668.3075853 | 680.290687   | 773.2942976 |
| P50429 | Arsb     | Arylsulfatase B                                                  | 484.17   | 37.83 | 59647  | 14 | 1522174.642 | 1280422.86   | 1175037.347 | 1294895.718 | 1302751.882 | 670399.8649  | 648891.4819 | 583370.5877 | 692618.734  | 898932.4343 | 1229972.169 | 972948.2624 | 1082473.429 | 1165131.121  | 1104767.705 |
| P50431 | Shmt1    | Serine hydroxymethyltransferase, cytosolic                       | 94.741   | 7.74  | 52601  | 2  | 19746.80176 | 20871.893    | 18324.66828 | 24120.94031 | 17169.52498 | 14464.2624   | 16311.99779 | 13647.06283 | 19177.52522 | 19627.31539 | 18737.23761 | 25969.00682 | 20292.09042 | 21703.10791  | 16239.44801 |
| P50516 | Atp6v1a  | V-type proton ATPase catalytic subunit A                         | 1366.171 | 59.48 | 68326  | 30 | 755996.1677 | 816061.0122  | 712038.6464 | 772261.155  | 712309.7409 | 720185.5339  | 752553.0692 | 792242.5978 | 811900.8545 | 785177.5052 | 772394.8725 | 793118.3617 | 771611.3261 | 784640.5448  | 780204.7784 |
| P50518 | Atp6v1e1 | V-type proton ATPase subunit E 1                                 | 214.308  | 36.73 | 26157  | 7  | 115809.518  | 98654.51852  | 89228.17953 | 107446.3574 | 88555.20517 | 76333.76371  | 45585.4294  | 52322.21964 | 47924.42902 | 52501.62993 | 100251.2427 | 68999.07244 | 63674.55241 | 71097.63599  | 71079.64829 |
| P50543 | S100a11  | Protein S100-A11                                                 | 164.439  | 71.43 | 11083  | 4  | 58592.71095 | 49915.3732   | 43285.05027 | 50926.99176 | 47468.49691 | 36542.32537  | 33193.02252 | 31213.27986 | 37520.34216 | 35247.86195 | 42463.66653 | 40317.85469 | 36990.68348 | 38416.80755  | 35216.23725 |
| P50544 | Acadvl   | Very long-chain specific acyl-CoA dehydrogenase, mitochondrial   | 264.315  | 15.09 | 70875  | 5  | 21895.24291 | 24494.54347  | 22153.72362 | 26088.90325 | 23531.05711 | 31382.93934  | 27511.80447 | 22720.39973 | 28228.54992 | 27646.45753 | 24567.24771 | 21602.97594 | 24953.90069 | 24792.13472  | 27998.09094 |
| P50580 | Pa2g4    | Proliferation-associated protein 2G4                             | 398.528  | 45.43 | 43699  | 14 | 359090.503  | 411904.8262  | 400449.6243 | 420092.793  | 406725.9286 | 395329.3674  | 447617.3308 | 499268.4067 | 444653.6665 | 381510.9459 | 381774.4837 | 426007.9234 | 398774.8241 | 388676.7873  | 397119.919  |
| P50637 | Tspo     | Translocator protein                                             | 244.825  | 42.6  | 18841  | 5  | 269762.2577 | 212246.7365  | 220294.9842 | 242211.0757 | 206165.3426 | 294165.427   | 232751.9057 | 267193.4008 | 230703.2848 | 234550.4959 | 250478.2985 | 246872.0547 | 267862.6421 | 260684.5499  | 204310.8662 |
| P51125 | Cast     | Calpastatin                                                      | 88.948   | 7.23  | 84922  | 3  | 5700.222634 | 2771.230938  | 8753.947401 | 10560.45247 | 5681.806781 | 3506.331953  | 5522.249964 | 9316.431507 | 9125.730245 | 9869.179565 | 8792.09979  | 5143.586299 | 2781.782979 | 4994.429593  | 10359.8248  |
| P51174 | Acadl    | Long-chain specific acyl-CoA dehydrogenase, mitochondrial        | 859.062  | 52.09 | 47908  | 20 | 502445.9459 | 510079.3809  | 459195.1614 | 480346.2102 | 511499.1623 | 571867.8317  | 521657.2503 | 544519.9976 | 535275.8299 | 576587.9071 | 479804.9303 | 509294.5909 | 543231.1802 | 553211.6874  | 503663.1698 |
| P51175 | Ppox     | Protoporphyrinogen oxidase                                       | 80.073   | 15.3  | 50871  | 5  | 29871.88223 | 330138.97785 | 33385.86267 | 30484.19823 | 27652.91653 | 369697.45049 | 31429.69129 | 27549.0341  | 32302.77168 | 38753.69185 | 29813.01122 | 29224.04577 | 30894.08267 | 33328.39376  | 34663.45722 |
| P51410 | Rpl9     | 60S ribosomal protein L9                                         | 476.129  | 59.38 | 21881  | 11 | 477190.5042 | 480333.0119  | 484492.9493 | 489914.8628 | 462392.1572 | 474091.8555  | 557509.4642 | 546645.3882 | 565826.982  | 499941.6868 | 444965.3119 | 525617.4761 | 468140.5296 | 503339.5197  | 493647.8794 |
| P51432 | Picb3    | 1-phosphatidylinositol 4,5-bisphosphate phosphodiesterase beta-3 | 233.802  | 8.35  | 139487 | 7  | 22575.27909 |              |             |             |             |              |             |             |             |             |             |             |             |              |             |

|        |         |                                                                                                            |          |       |        |    |             |             |             |             |             |             |             |             |             |             |             |             |             |             |             |
|--------|---------|------------------------------------------------------------------------------------------------------------|----------|-------|--------|----|-------------|-------------|-------------|-------------|-------------|-------------|-------------|-------------|-------------|-------------|-------------|-------------|-------------|-------------|-------------|
| P52633 | Stat6   | Signal transducer and transcription activator 6                                                            | 87.955   | 6.69  | 93497  | 4  | 21323.854   | 18977.09572 | 19746.09306 | 22479.27837 | 18461.20493 | 21738.89394 | 20481.77804 | 22375.08763 | 19049.84007 | 22856.22361 | 17212.75265 | 20429.28129 | 19683.75588 | 15376.13822 | 21162.80218 |
| P52825 | Cpt2    | Carnitine O-palmitoyltransferase 2, mitochondrial                                                          | 46.797   | 4.56  | 73981  | 2  | 12408.84689 | 14091.5275  | 12489.77283 | 14314.34568 | 12627.40037 | 12426.82124 | 13214.83378 | 11804.47054 | 8455.96398  | 13419.22083 | 13124.23747 | 8262.873732 | 12037.77866 | 13283.37225 | 14758.57668 |
| P52875 | Tmem165 | Transmembrane protein 165                                                                                  | 69.156   | 13.62 | 34791  | 2  | 9960.508518 | 12160.92596 | 9554.755535 | 8535.347831 | 11581.79917 | 14828.46446 | 13428.72787 | 13836.68454 | 13178.50425 | 12469.11188 | 10024.49866 | 10351.90756 | 10450.51847 | 9828.881561 | 9539.431325 |
| P53042 | Ppp5c   | Serine/threonine-protein phosphatase 5                                                                     | 90.421   | 7.01  | 56917  | 3  | 25372.75137 | 23834.562   | 20423.39889 | 16853.25109 | 22381.18107 | 23290.74491 | 24189.62348 | 22713.71866 | 23934.75464 | 21451.5383  | 24047.25983 | 25525.8151  | 23283.32784 | 24415.37997 | 21324.28611 |
| P53395 | Dbt     | Lipoamide acyltransferase component of branched-chain alpha-keto acid dehydrogenase complex, mitochondrial | 118.196  | 6.43  | 53247  | 2  | 10116.58061 | 8488.310618 | 5546.879895 | 8068.922695 | 8174.572858 | 6870.990281 | 7808.367737 | 6519.340296 | 10402.97294 | 8600.196994 | 9160.552442 | 6827.297567 | 8296.852355 | 7036.347643 | 8746.129043 |
| P53569 | Cebpz   | CCAAT/enhancer-binding protein zeta                                                                        | 47.08    | 3.14  | 120262 | 2  | 4815.777939 | 3408.595833 | 3133.401878 | 7336.047194 | 3158.825642 | 5534.984017 | 4375.199835 | 6805.714384 | 4879.082041 | 6056.536205 | 4368.698602 | 5233.380699 | 5334.235343 | 5089.640748 | 5214.034097 |
| P53676 | Ap3m1   | AP-3 complex subunit mu-1                                                                                  | 157.049  | 25.36 | 46981  | 6  | 37250.62327 | 37931.22438 | 30883.57346 | 34448.88238 | 34181.4841  | 27373.46243 | 36308.53327 | 32936.35489 | 30077.00301 | 31204.31608 | 35160.13951 | 31589.52901 | 35122.25255 | 30106.53139 | 33278.91963 |
| P53811 | Pitpnb  | Phosphatidylinositol transfer protein beta isoform                                                         | 114.69   | 34.69 | 31487  | 7  | 89439.07869 | 88773.67034 | 88995.73813 | 91973.81601 | 89147.3465  | 74110.78254 | 69762.11168 | 71274.13565 | 70237.54406 | 76374.12219 | 82452.26204 | 84070.48313 | 72463.07244 | 91352.82692 | 87217.75848 |
| P53986 | Slc16a1 | Monocarboxylate transporter 1                                                                              | 98.015   | 6.49  | 53267  | 3  | 8955.279133 | 10618.9598  | 7967.785681 | 9482.408726 | 8788.707579 | 22321.12749 | 12522.49034 | 13996.07995 | 11924.81963 | 11405.67391 | 11231.52415 | 9977.673655 | 19293.69244 | 9443.363144 | 10221.46076 |
| P54001 | P4ha1   | Prolyl 4-hydroxylase subunit alpha-1                                                                       | 376.958  | 26.03 | 60898  | 11 | 64288.56795 | 70455.62403 | 59467.14485 | 55151.9312  | 68341.48522 | 59154.88314 | 63156.99933 | 63695.80769 | 58437.94759 | 51109.99674 | 53881.9642  | 50311.50178 | 57113.6     | 59608.69392 | 56897.03048 |
| P54071 | Idh2    | Isocitrate dehydrogenase [NADP], mitochondrial                                                             | 817.561  | 48.67 | 50906  | 23 | 605879.8719 | 602116.279  | 564916.0769 | 574929.086  | 566185.2915 | 567399.5187 | 479365.1589 | 514710.6495 | 548026.5581 | 577065.9952 | 584121.7559 | 546511.4735 | 596883.781  | 583467.1325 | 580585.8237 |
| P54116 | Stom    | Erythrocyte band 7 integral membrane protein                                                               | 430.834  | 47.18 | 31375  | 11 | 349521.5968 | 177863.8656 | 162653.8528 | 349514.5106 | 158993.6396 | 149632.4491 | 150789.1189 | 136413.4443 | 149180.25   | 151518.618  | 177450.2862 | 148140.0954 | 161833.2318 | 315579.7739 | 158747.1939 |
| P54276 | Msh6    | DNA mismatch repair protein Msh6                                                                           | 449.95   | 15.32 | 151084 | 15 | 92323.40462 | 81445.59878 | 92367.79319 | 89731.26107 | 112736.3638 | 135488.3939 | 116072.7917 | 90661.37514 | 93752.8783  | 115658.2772 | 111406.3822 | 73542.64025 | 79770.2346  | 105656.4673 | 103503.6911 |
| P54311 | Gnb1    | Guanine nucleotide-binding protein G(i)/G(S)/G(T) subunit beta-1                                           | 489.887  | 49.71 | 37377  | 12 | 654701.8559 | 586807.1666 | 610086.8154 | 578892.9837 | 605237.7719 | 543759.4914 | 594791.0881 | 629708.0919 | 547445.7822 | 589434.1617 | 533140.2448 | 525431.4783 | 590178.658  | 615836.1073 | 560951.218  |
| P54313 | Gnb2    | Guanine nucleotide-binding protein G(i)/G(S)/G(T) subunit beta-2                                           | 730.278  | 61.18 | 37331  | 17 | 783443.8723 | 726351.8862 | 735588.3213 | 718080.6226 | 726875.8376 | 642697.2432 | 691719.6946 | 732980.0589 | 675088.688  | 679624.4547 | 637549.7974 | 648451.6144 | 707337.3257 | 729906.9485 | 684640.834  |
| P54645 | Prkaa1  | 5'-AMP-activated protein kinase catalytic subunit alpha-1                                                  | 53.041   | 6.8   | 63973  | 2  | 6152.480308 | 9085.613843 | 8561.206908 | 9100.808275 | 7588.373103 | 7990.889251 | 8524.774526 | 6757.408044 | 7307.603435 | 7599.70197  | 8409.658918 | 7396.733046 | 6015.013754 | 7851.370641 | 7423.990275 |
| P54726 | Rad23a  | UV excision repair protein RAD23 homolog A                                                                 | 120.914  | 17.36 | 39706  | 4  | 54206.91842 | 15796.11396 | 48290.16263 | 32623.19536 | 29475.67687 | 44270.48684 | 27422.78432 | 29432.21538 | 42710.67037 | 28805.52691 | 50223.6147  | 46343.85459 | 45335.68867 | 38668.41238 | 45148.1367  |
| P54728 | Rad23b  | UV excision repair protein RAD23 homolog B                                                                 | 113.113  | 13.46 | 43513  | 5  | 68181.09296 | 30303.91559 | 55569.64782 | 42914.69375 | 34799.41078 | 48213.84038 | 28612.53202 | 34202.72145 | 45719.66329 | 29242.69545 | 63843.05908 | 53726.04636 | 52004.028   | 42243.91821 | 48388.84394 |
| P54729 | Nub1    | NEDD8 ultimate buster 1                                                                                    | 69.033   | 8.79  | 70307  | 3  | 9845.290466 | 0.007562416 | 9106.775419 | 12919.00124 | 9411.219748 | 10053.49429 | 9390.771409 | 12015.76275 | 9755.744444 | 0.013320187 | 9342.388479 | 13061.29114 | 10641.74391 | 10817.10451 | 10218.12409 |
| P54775 | Psmc4   | 26S proteasome regulatory subunit 6B                                                                       | 495.645  | 55.02 | 47408  | 14 | 165639.2116 | 166665.879  | 200300.1355 | 179044.2373 | 158465.8645 | 135524.5253 | 157622.2952 | 172310.0864 | 183989.4306 | 143071.8878 | 163252.1996 | 164804.354  | 169244.5636 | 170219.0586 | 164633.3403 |
| P54818 | Galc    | Galactocerebrosidase                                                                                       | 55.234   | 6.29  | 77256  | 2  | 8603.677334 | 8848.722116 | 4550.06756  | 4808.81202  | 5195.280886 | 2915.334761 | 4616.51952  | 5831.071982 | 5925.642305 | 5279.652954 | 6853.251316 | 4914.172435 | 6474.646869 | 4799.581999 | 7759.465125 |
| P54822 | Adsl    | Adenylosuccinate lyase                                                                                     | 453.506  | 35.12 | 54866  | 11 | 149101.5299 | 154898.367  | 147267.2248 | 148124.1548 | 147064.6    | 110610.9861 | 129269.1984 | 133519.3881 | 121130.3228 | 124715.3116 | 122584.5425 | 143841.9842 | 121682.4289 | 144200.2144 | 137251.2253 |
| P54823 | Ddx6    | Probable ATP-dependent RNA helicase DDX6                                                                   | 306.321  | 26.5  | 54192  | 8  | 73959.48478 | 76089.72204 | 83192.27296 | 86608.06006 | 80950.12726 | 74499.62767 | 91355.88833 | 80547.36322 | 80157.57574 | 74520.18527 | 77049.79851 | 76585.33863 | 74481.70409 | 73242.1115  | 75540.11328 |
| P54921 | Napa    | Alpha-soluble NSF attachment protein                                                                       | 261.977  | 27.12 | 33193  | 6  | 52717.53629 | 55693.00965 | 52301.0464  | 54465.86387 | 49956.91307 | 48893.99039 | 52513.60253 | 48135.267   | 51794.56793 | 46818.52556 | 50998.72642 | 53520.73867 | 52193.9951  | 52590.83697 | 49614.47605 |
| P55062 | Tmbim6  | Bax inhibitor 1                                                                                            | 43.975   | 3.8   | 26464  | 2  | 10621.95935 | 6512.506172 | 11798.75608 | 10761.12768 | 7365.071461 | 14614.12142 | 13486.25633 | 14699.4024  | 6490.81711  | 12803.73915 | 8062.828005 | 10538.29597 | 7844.034615 | 13674.23941 | 12937.50294 |
| P55096 | Abcd3   | ATP-binding cassette sub-family D member 3                                                                 | 43.503   | 5.61  | 75475  | 2  | 8240.879493 | 9862.968733 | 6415.1074   | 8436.36067  | 6160.143772 | 7161.929413 | 8451.731696 | 9319.953435 | 10993.70556 | 10677.66496 | 7855.013616 | 4114.698103 | 8381.618362 | 7373.756932 | 8700.360607 |
| P55194 | Sh3bp1  | SH3 domain-binding protein 1                                                                               | 151.519  | 7.21  | 74172  | 3  | 10800.23329 | 15587.18238 | 9380.684817 | 9877.088318 | 11045.59704 | 11034.47915 | 8861.102938 | 9233.859742 | 11491.25563 | 8135.368225 | 13584.39015 | 10086.5543  | 10174.7392  | 11164.59899 | 10401.57858 |
| P55264 | Adk     | Adenosine kinase                                                                                           | 112.439  | 13.57 | 40149  | 4  | 39938.84159 | 36282.5686  | 40323.19599 | 49093.037   | 51696.48789 | 31813.90263 | 36222.29153 | 32061.75725 | 36128.3964  | 31565.45299 | 40717.22306 | 33157.50898 | 35369.0214  | 40189.16909 | 31358.52057 |
| P55302 | Lrpap1  | Alpha-2-macroglobulin receptor-associated protein                                                          | 230.143  | 22.5  | 42215  | 7  | 135002.1917 | 128852.2124 | 114861.0684 | 117639.7548 | 127526.8785 | 161477.3694 | 165117.0657 | 165127.3808 | 158234.4285 | 164743.7121 | 157079.2752 | 148582.3203 | 150781.7313 | 141124.6345 | 140216.2419 |
| P56135 | Atp5mf  | ATP synthase subunit f, mitochondrial                                                                      | 50.03    | 34.09 | 10344  | 4  | 43182.30052 | 45446.53758 | 47877.32284 | 50747.33443 | 43750.62928 | 59527.58909 | 55852.58671 | 55039.89476 | 56450.33315 | 55276.42466 | 49688.41908 | 50044.89976 | 52154.33666 | 53427.23602 | 50937.12828 |
| P56391 | Cox6b1  | Cytochrome c oxidase subunit 6B1                                                                           | 60.841   | 29.07 | 10071  | 2  | 27084.02449 | 25527.30855 | 7085.805646 | 25683.83623 | 24783.72323 | 19983.84928 | 23341.5272  | 17356.20319 | 18879.32082 | 22335.72565 | 18727.21579 | 21007.58998 | 20855.364   | 22083.22912 | 6199.090545 |
| P56399 | Usp5    | Ubiquitin carboxyl-terminal hydrolase 5                                                                    | 937.149  | 46.39 | 95833  | 25 | 344270.2992 | 347272.8521 | 322634.116  | 334898.1926 | 298043.1751 | 267772.6086 | 313362.4236 | 277486.276  | 298477.9144 | 293076.3336 | 314717.8329 | 319801.9328 | 320555.0807 | 316721.6269 | 321088.1366 |
| P56477 | Irf5    | Interferon regulatory factor 5                                                                             | 129.278  | 6.24  | 56005  | 3  | 28334.61255 | 31109.54162 | 28770.17737 | 28664.88054 | 25286.62636 | 24589.03268 | 30243.43204 | 27868.09924 | 33802.63745 | 32545.67222 | 29079.16959 | 29726.57094 | 30147.38632 | 31243.32998 | 30006.7737  |
| P56480 | Atp5f1b | ATP synthase subunit beta, mitochondrial                                                                   | 1842.881 | 74.86 | 56300  | 37 | 2131751.224 | 2215010.756 | 2049437.283 | 2108782.009 | 1936299.815 | 2137911.184 | 2183946.794 | 2415931.069 | 2469969.188 | 2319588.444 | 2191319.783 | 2251492.176 | 2282052.337 | 2198134.624 | 2098948.645 |
| P56546 | Ctbp2   | C-terminal-binding protein 2                                                                               | 223.338  | 30.56 | 48957  | 9  | 143470.8831 | 149839.0201 | 156073.3894 | 164985.1555 | 160576.6673 | 161467.8603 | 153944.2034 | 170450.3557 | 164892.423  | 163726.3162 | 142241.9809 | 164969.8464 | 163142.9809 | 159984.0083 | 161945.7032 |
| P56959 | Fus     | RNA-binding protein FUS                                                                                    | 350.781  | 22.2  | 52673  | 10 | 133512.9371 | 140598.0204 | 138842.0846 | 132181.8695 | 132477.971  | 117272.497  | 124195.9143 | 115727.3233 | 121594.5786 | 111712.8977 | 147087.9539 | 138036.7163 | 129124.1177 | 131459.915  | 121680.5966 |
| P57080 | Usp25   | Ubiquitin carboxyl-terminal hydrolase 25                                                                   | 42.54    | 3.03  | 121420 | 2  | 5786.03594  | 6111.011851 | 7169.444752 | 6907.047039 | 6366.820209 | 6586.371962 | 6110.624254 | 1432.001873 | 6617.680589 | 4922.26488  | 7618.715863 | 7052.690052 | 6106.420981 | 5530.585136 | 1503.083082 |
| P57716 | Nicstrn | Nicastrin                                                                                                  | 174.822  | 12.01 | 78492  | 6  | 103288.032  | 95408.41208 | 102771.3481 | 89741.80783 | 108208.9793 | 126883.5371 | 135825.1886 | 126655.7911 | 128040.848  | 116091.5296 | 108435.4344 | 106343.0254 | 108106.8576 | 117422.5462 | 115364.7519 |
| P57746 | Atp6v1d | V-type proton ATPase subunit D                                                                             | 155.739  | 26.32 | 28369  | 4  | 41314.94296 | 44832.88157 | 37957.36865 | 39198.81935 | 40162.44058 | 39648.49543 | 41607.76362 | 47886.67339 | 42409.65206 | 39670.8067  | 41204.61891 | 41969.62698 | 42896.92962 | 36744.04017 | 42252.31218 |
| P57759 | Erp29   | Endoplasmic reticulum resident protein 29                                                                  | 193.219  | 25.95 | 28823  | 6  | 156115.3857 |             |             |             |             |             |             |             |             |             |             |             |             |             |             |

|        |         |                                                      |          |       |        |    |             |             |             |             |              |             |             |             |             |             |             |             |             |             |             |
|--------|---------|------------------------------------------------------|----------|-------|--------|----|-------------|-------------|-------------|-------------|--------------|-------------|-------------|-------------|-------------|-------------|-------------|-------------|-------------|-------------|-------------|
| P58044 | Idi1    | Isopentenyl-diphosphate Delta-isomerase 1            | 119.261  | 24.67 | 26289  | 4  | 52495.40056 | 60054.03925 | 56430.33815 | 65043.95237 | 56428.18378  | 40246.45196 | 54079.41992 | 47429.61776 | 45961.1377  | 47811.75862 | 58537.78827 | 61095.46755 | 58156.86148 | 56144.69961 | 57708.94007 |
| P58242 | Smpd3b  | Acid sphingomyelinase-like phosphodiesterase 3b      | 120.72   | 14.69 | 51600  | 4  | 18755.86152 | 15614.63395 | 12454.74899 | 12872.10939 | 13922.99006  | 8642.674872 | 12434.09687 | 13568.49117 | 12424.95857 | 10409.72527 | 14009.63746 | 10768.97616 | 14587.27744 | 11169.58248 | 11610.13931 |
| P58252 | Eef2    | Elongation factor 2                                  | 2023.466 | 55.94 | 95314  | 51 | 2684523.578 | 2927014.493 | 2742852.467 | 2742561.471 | 2821740.741  | 2744936.411 | 2937047.827 | 3062910.335 | 3061926.385 | 2551176.198 | 2646118.939 | 2731526.554 | 2707608.318 | 2748597.835 | 2750391.917 |
| P58281 | Opa1    | Dynamin-like 120 kDa protein, mitochondrial          | 67       | 3.96  | 111339 | 3  | 2925.628294 | 2657.632829 | 6194.552206 | 2160.089253 | 6020.267874  | 5469.862509 | 3079.06096  | 6508.804854 | 7623.201866 | 6330.776809 | 6354.668928 | 3758.893527 | 2581.262578 | 7421.815232 | 6323.464756 |
| P58321 | Uchl4   | Ubiquitin carboxyl-terminal hydrolase isozyme L4     | 94.532   | 11.59 | 26450  | 2  | 6495.129797 | 6574.583169 | 3196.972728 | 5394.650656 | 2839.580068  | 5266.931474 | 2227.902991 | 2865.180337 | 6023.827799 | 4022.197739 | 6701.616032 | 6136.798389 | 5630.767353 | 6103.482105 | 2172.154903 |
| P58389 | Ptpa    | Serine/threonine-protein phosphatase 2A activator    | 250.352  | 36.53 | 36710  | 8  | 75035.01232 | 84937.02242 | 69307.55572 | 87612.07581 | 66054.07408  | 51445.81606 | 64206.67519 | 53242.60407 | 52912.30539 | 53516.11201 | 78837.60058 | 61955.32709 | 64321.3266  | 82680.48406 | 68945.65629 |
| P58681 | Tlr7    | Toll-like receptor 7                                 | 224.646  | 8.76  | 121837 | 7  | 56157.11105 | 43940.63374 | 55181.06784 | 52139.1136  | 48085.90284  | 45164.62271 | 47124.24067 | 44369.47724 | 51040.31688 | 43919.73321 | 53735.44692 | 46962.46311 | 52646.09846 | 48519.87331 | 49932.12643 |
| P58742 | Aaas    | Aladin                                               | 78.481   | 7.14  | 59431  | 3  | 18108.60112 | 10338.41025 | 17080.48934 | 15880.35061 | 17773.59705  | 19122.01721 | 19575.54513 | 20213.96391 | 17963.35327 | 12099.66484 | 17321.4417  | 18119.19843 | 16516.76958 | 17227.8751  | 19610.40383 |
| P59017 | Bcl2l13 | Bcl-2-like protein 13                                | 170.758  | 15.9  | 46719  | 4  | 29123.32479 | 31652.20545 | 13879.68055 | 34222.30338 | 13235.86677  | 7924.706847 | 9920.660671 | 2293.112038 | 11063.52035 | 10278.81447 | 28622.75045 | 24557.51872 | 24482.3802  | 11497.79311 | 18817.69209 |
| P59325 | Eif5    | Eukaryotic translation initiation factor 5           | 111.347  | 7.46  | 48968  | 4  | 30063.67718 | 26600.97496 | 26273.75746 | 27897.4403  | 26372.51844  | 19869.05574 | 23778.49647 | 22692.18091 | 22550.54528 | 23526.14909 | 24206.97726 | 24477.61419 | 23234.71386 | 24943.36287 | 25066.01274 |
| P59708 | Sf3b6   | Splicing factor 3B subunit 6                         | 36.341   | 18.4  | 14585  | 2  | 10833.56949 | 6283.345579 | 10636.62514 | 5916.039362 | 9873.374253  | 9398.350995 | 11611.1004  | 10300.61946 | 9553.65584  | 9632.308346 | 10847.06415 | 10802.96995 | 7057.064726 | 10836.14958 | 9460.781517 |
| P59729 | Rin3    | Ras and Rab interactor 3                             | 28.734   | 3.16  | 107220 | 2  | 2304.43945  | 1704.675546 | 0.009509917 | 2126.788105 | 1714.918415  | 1882.965674 | 1413.940293 | 1247.389249 | 1353.892872 | 1928.005279 | 1679.000014 | 1753.844069 | 1595.276553 | 1595.134514 | 1655.392085 |
| P59999 | Arcp4   | Actin-related protein 2/3 complex subunit 4          | 381.212  | 66.07 | 19667  | 9  | 1025049.038 | 1015125.694 | 1026093.02  | 996486.8619 | 1037499.542  | 976552.7313 | 1020983.31  | 1031669.653 | 1055626.345 | 1014966.82  | 991635.3801 | 1018662.355 | 1042732.957 | 1069544.322 | 1083827.066 |
| P60122 | Ruvbl1  | RuvB-like 1                                          | 510.864  | 37.06 | 50214  | 12 | 228691.5711 | 258943.4737 | 252282.8088 | 249303.0534 | 250190.1835  | 259093.7732 | 259056.403  | 251744.4926 | 240022.8627 | 247297.8881 | 232234.6163 | 244991.2812 | 240663.0892 | 255271.6654 | 243038.4766 |
| P60229 | Eif3e   | Eukaryotic translation initiation factor 3 subunit E | 401.029  | 35.28 | 52221  | 11 | 182526.3808 | 207289.3763 | 201089.1353 | 204739.9822 | 196286.021   | 191581.0354 | 206508.3729 | 206673.0495 | 194423.2539 | 180935.3849 | 204212.9717 | 208197.531  | 180285.9777 | 184316.7777 | 207494.2907 |
| P60335 | Pcbp1   | Poly(C)-binding protein 1                            | 636.305  | 63.48 | 37498  | 14 | 618598.6419 | 675767.9765 | 616316.9145 | 616532.4403 | 657522.4376  | 572041.9021 | 557495.4363 | 593211.5174 | 574596.1859 | 481587.002  | 515532.777  | 560657.8146 | 453741.6678 | 552196.6349 | 572379.5449 |
| P60517 | Gabarp  | Gamma-aminobutyric acid receptor-associated protein  | 31.286   | 20.51 | 13918  | 2  | 14520.9297  | 12526.23034 | 12150.54932 | 14440.79571 | 15719.66646  | 16935.87113 | 15844.199   | 19203.549   | 20297.98295 | 0.013320187 | 14198.08162 | 15130.48979 | 13728.15744 | 12590.45306 | 16116.80011 |
| P60670 | Nploc4  | Nuclear protein localization protein 4 homolog       | 85.95    | 4.11  | 68017  | 2  | 8899.169356 | 7362.366176 | 7585.725935 | 5965.264664 | 7193.035172  | 6686.955532 | 7546.598609 | 9501.401288 | 8734.743564 | 6905.228185 | 8573.18987  | 7792.787322 | 8495.687909 | 7533.31375  | 8139.704071 |
| P60710 | Actb    | Actin, cytoplasmic 1                                 | 3245.62  | 90.93 | 41737  | 62 | 4586052.72  | 46775046.85 | 49577601.56 | 49137577.1  | 46860692.17  | 5088196.66  | 49784024.41 | 50750695.46 | 50961228.37 | 50130806.9  | 49520841.11 | 50411603.44 | 53038066.87 | 51572301.67 | 49771804.91 |
| P60766 | Cdc42   | Cell division control protein 42 homolog             | 384.278  | 58.12 | 21259  | 9  | 1000275.725 | 827285.9966 | 825715.1024 | 924889.5965 | 8271094.1976 | 741195.4277 | 745858.5663 | 738781.9466 | 759271.8078 | 646765.3651 | 726321.2597 | 713594.28   | 664239.7196 | 737464.3038 | 770341.9104 |
| P60843 | Eif4a1  | Eukaryotic initiation factor 4A-I                    | 1018.101 | 54.93 | 46154  | 24 | 858907.6659 | 1056380.426 | 1011596.177 | 1044845.945 | 1029389.082  | 1250689.366 | 1228049.619 | 1290619.486 | 1344792.233 | 1179764.919 | 1072385.462 | 1124799.046 | 1089265.483 | 1074704.76  | 1068442.261 |
| P60867 | Rps20   | 40S ribosomal protein S20                            | 130.94   | 28.57 | 13373  | 4  | 338399.7889 | 341661.7817 | 329740.8393 | 345589.0582 | 356862.895   | 294477.7419 | 297999.8845 | 303148.1295 | 283098.4212 | 276844.114  | 275854.1029 | 271374.6236 | 242026.3704 | 258729.7732 | 274045.4009 |
| P60892 | Prps1   | Ribose-phosphate pyrophosphokinase 1                 | 338.338  | 27.04 | 34834  | 8  | 74650.46405 | 78576.72076 | 77230.62933 | 81117.72384 | 84690.26311  | 77119.57594 | 91183.61477 | 77283.15918 | 86336.37938 | 95882.99448 | 90117.44349 | 97172.66056 | 87831.14764 | 89880.45593 | 80228.49708 |
| P60901 | PsmA6   | Proteasome subunit alpha type-6                      | 260.953  | 38.21 | 27399  | 8  | 266314.1892 | 263316.1223 | 273623.7674 | 258692.466  | 290374.3757  | 261116.9863 | 330706.3988 | 325201.1126 | 263376.7871 | 273546.0624 | 243831.8583 | 269002.0101 | 264331.2154 | 264476.1654 | 273641.1581 |
| P61021 | Rab5b   | Ras-related protein Rab-5B                           | 133.178  | 21.4  | 23707  | 4  | 178610.7768 | 179401.0325 | 174891.0815 | 167226.3164 | 185258.2907  | 183095.3758 | 198889.9941 | 197277.0109 | 193498.2465 | 183513.2407 | 186724.0277 | 177655.5394 | 185938.4544 | 196684.9323 | 196392.1304 |
| P61027 | Rab10   | Ras-related protein Rab-10                           | 292.933  | 43    | 22541  | 9  | 158433.7315 | 155073.21   | 138192.2434 | 145562.3996 | 148610.795   | 149234.8728 | 140375.5519 | 151230.787  | 160485.4064 | 165091.4089 | 154612.4839 | 137956.2797 | 161400.4327 | 153605.6127 | 154045.0463 |
| P61028 | Rab8b   | Ras-related protein Rab-8B                           | 303.135  | 44.44 | 23603  | 9  | 111523.8605 | 100330.5162 | 102611.1916 | 103239.1503 | 117594.5976  | 128991.0664 | 117527.4296 | 124123.2663 | 124922.9958 | 132469.6584 | 122970.7063 | 111754.1619 | 125140.4846 | 121845.8247 | 114993.072  |
| P61078 | Ube2d3  | Ubiquitin-conjugating enzyme E2 D3                   | 106.186  | 40.82 | 16687  | 4  | 124230.0277 | 100973.503  | 128696.6955 | 122011.1889 | 100597.5615  | 112085.8816 | 88804.22434 | 96607.23656 | 91784.17437 | 77085.57335 | 105547.582  | 93309.22957 | 85363.778   | 85338.35852 | 100702.1826 |
| P61087 | Ube2k   | Ubiquitin-conjugating enzyme E2 K                    | 130.606  | 31    | 22407  | 4  | 39753.16086 | 42695.61434 | 44187.71737 | 37692.56417 | 39875.73513  | 39200.64417 | 44693.46207 | 48672.91907 | 46260.04444 | 35651.42698 | 38656.69561 | 43774.50601 | 37187.477   | 40959.53925 | 41732.48864 |
| P61089 | Ube2n   | Ubiquitin-conjugating enzyme E2 N                    | 157.983  | 45.39 | 17138  | 4  | 129087.5224 | 109186.7781 | 117337.3939 | 109415.2375 | 94863.66738  | 113460.2852 | 84016.369   | 74105.91151 | 102336.4511 | 72708.67981 | 128462.646  | 94844.78944 | 81943.63428 | 74272.12438 | 90516.38045 |
| P61107 | Rab14   | Ras-related protein Rab-14                           | 457.453  | 73.02 | 23927  | 13 | 486521.2744 | 419554.9357 | 423288.1856 | 444672.598  | 401962.281   | 370409.0527 | 403344.0255 | 315122.5595 | 361260.4135 | 377965.9114 | 450510.7121 | 393026.3497 | 453007.0152 | 423574.7277 | 428572.5277 |
| P61161 | Acr2    | Actin-related protein 2                              | 1171.859 | 58.38 | 44761  | 26 | 991801.6123 | 1000778.219 | 963013.3566 | 993676.7624 | 1022532.453  | 853158.0481 | 858351.0413 | 882853.7598 | 914788.6705 | 810012.3544 | 946264.9601 | 1018215.003 | 979151.419  | 970028.8298 | 934710.0862 |
| P61164 | Acr1a   | Alpha-actinin                                        | 328.094  | 30.05 | 42614  | 8  | 111824.5166 | 112354.4093 | 117402.2325 | 116641.5719 | 111501.1634  | 101004.0463 | 118294.7884 | 111895.6869 | 110392.4452 | 109885.175  | 111032.6018 | 101884.5753 | 112444.8756 | 126415.9602 | 98508.89279 |
| P61202 | Cops2   | COP9 signalosome complex subunit 2                   | 226.863  | 26.19 | 51597  | 8  | 56795.83252 | 56101.65612 | 54266.07589 | 48874.38872 | 54309.4029   | 45686.33253 | 51895.78368 | 49974.9853  | 49065.04562 | 36107.0906  | 50319.16594 | 45657.86966 | 52952.60567 | 46004.2222  | 52990.77007 |
| P61205 | Arf3    | ADP-ribosylation factor 3                            | 661.188  | 58.56 | 20601  | 14 | 636176.2146 | 570414.5718 | 580235.4888 | 619963.9738 | 592545.2479  | 597417.6325 | 599179.2418 | 616596.1469 | 635487.2724 | 605385.2454 | 639038.1921 | 634327.2279 | 643690.7961 | 695162.3899 | 664837.9337 |
| P61211 | Arf1    | ADP-ribosylation factor-like protein 1               | 127.795  | 19.89 | 20412  | 3  | 36839.83299 | 36353.16375 | 38370.13948 | 42340.4772  | 41242.80901  | 52880.48715 | 46882.73848 | 51912.56856 | 54252.17174 | 46558.0926  | 41890.2303  | 43696.92691 | 39442.65628 | 46749.82621 | 41784.02912 |
| P61222 | Abce1   | ATP-binding cassette sub-family E member 1           | 780.715  | 45.41 | 67314  | 20 | 164881.418  | 172977.3502 | 187281.6861 | 192256.4593 | 197688.6216  | 163074.6681 | 223505.4918 | 187857.6572 | 222887.7018 | 158896.0568 | 181997.8658 | 200056.0503 | 164245.4308 | 172932.0824 | 176334.5295 |
| P61255 | Rpl26   | 60S ribosomal protein L26                            | 205.138  | 39.31 | 17258  | 8  | 353641.872  | 382674.456  | 373068.6319 | 391458.6632 | 400130.9965  | 41119.8222  | 447553.8102 | 451017.8621 | 429713.3319 | 396901.0899 | 395163.2452 | 391012.8707 | 405494.1543 | 387755.702  | 350228.0931 |
| P61290 | PsmE3   | Proteasome activator complex subunit 3               | 136.902  | 16.93 | 29506  | 4  | 28537.86679 | 30644.79526 | 30693.80068 | 29535.03027 | 33729.20109  | 32946.96012 | 5862.48673  | 38124.02802 | 32176.86305 | 31250.42724 | 28395.21376 | 31690.29444 | 31942.74543 | 31957.15596 | 31345.61149 |
| P61314 | Rpl15   | 60S ribosomal protein L15                            | 216.757  | 38.73 | 24146  | 8  | 287968.2072 | 262589.9496 | 2387        |             |              |             |             |             |             |             |             |             |             |             |             |

|        |          |                                                                  |         |       |       |    |             |             |             |             |             |             |             |             |             |             |             |             |             |             |             |
|--------|----------|------------------------------------------------------------------|---------|-------|-------|----|-------------|-------------|-------------|-------------|-------------|-------------|-------------|-------------|-------------|-------------|-------------|-------------|-------------|-------------|-------------|
| P62082 | Rps7     | 40S ribosomal protein S7                                         | 294.7   | 52.06 | 22127 | 12 | 670101.1608 | 660123.8189 | 617347.1049 | 684662.1481 | 603917.9456 | 632192.8779 | 724614.4984 | 765313.8361 | 784936.9216 | 720664.4833 | 658809.5356 | 652098.3891 | 656267.6849 | 674165.7604 | 647968.4402 |
| P62137 | Ppp1ca   | Serine/threonine-protein phosphatase PP1-alpha catalytic subunit | 495.497 | 46.06 | 37540 | 12 | 224169.39   | 241595.6853 | 206799.0228 | 194517.3748 | 219491.2628 | 193991.3415 | 203079.8561 | 214961.137  | 211973.3826 | 175860.447  | 161803.4093 | 219849.6209 | 206550.5057 | 209242.6109 | 222558.0257 |
| P62141 | Ppp1cb   | Serine/threonine-protein phosphatase PP1-beta catalytic subunit  | 490.999 | 33.94 | 37187 | 9  | 179531.5834 | 176341.8689 | 149148.4862 | 166920.185  | 156368.6839 | 142631.4629 | 148671.5655 | 138453.6421 | 150483.6971 | 134940.9394 | 143948.9647 | 162383.5746 | 149999.3355 | 154819.627  | 164650.953  |
| P62192 | Psmc1    | 26S proteasome regulatory subunit 4                              | 440.189 | 38.86 | 49185 | 13 | 232528.9262 | 224853.0414 | 245887.3893 | 236960.949  | 238847.4577 | 239766.7885 | 247762.6862 | 244242.4146 | 260534.122  | 241741.5587 | 216468.7972 | 233772.0147 | 228427.5261 | 222511.3684 | 234164.8833 |
| P62196 | Psmc5    | 26S proteasome regulatory subunit 8                              | 529.433 | 48.52 | 45626 | 15 | 199633.7526 | 187847.1618 | 186717.8241 | 195997.646  | 165279.3955 | 151892.341  | 207089.4304 | 198189.1087 | 200907.8639 | 193612.3933 | 190605.3475 | 191729.0791 | 135823.7659 | 195695.9505 | 182125.7123 |
| P62242 | Rps8     | 40S ribosomal protein S8                                         | 343.425 | 45.67 | 24205 | 8  | 125505.7842 | 136384.5448 | 135554.9626 | 139121.4235 | 130290.8164 | 189493.9344 | 234449.3517 | 221373.8579 | 214677.5962 | 190923.6603 | 122454.5606 | 140072.005  | 137175.8324 | 130764.335  | 170778.611  |
| P62245 | Rps15a   | 40S ribosomal protein S15a                                       | 335.051 | 71.54 | 14840 | 13 | 751961.4237 | 734066.0947 | 744840.8623 | 754946.6983 | 769275.1973 | 765855.2184 | 771208.0078 | 743225.8594 | 783824.38   | 692426.7527 | 707548.3161 | 709913.0637 | 669357.8375 | 741701.8031 | 678303.8645 |
| P62259 | Ywhae    | 14-3-3 protein epsilon                                           | 958.279 | 78.04 | 29174 | 26 | 2053060.469 | 2149441.102 | 1884839.327 | 1948934.662 | 2201661.396 | 1895656.258 | 1973548.158 | 2025739.253 | 1996666.596 | 1901983.961 | 1978362.307 | 2164183.478 | 2167877.609 | 2119649.88  | 2123375.689 |
| P62267 | Rps23    | 40S ribosomal protein S23                                        | 229.807 | 42.66 | 15808 | 5  | 308054.8122 | 345406.4479 | 334920.6251 | 324917.3539 | 356610.6541 | 412170.0029 | 390676.541  | 404716.1292 | 382559.4854 | 371444.1347 | 341623.4872 | 349219.7316 | 359420.6929 | 350811.4096 | 354795.5864 |
| P62270 | Rps18    | 40S ribosomal protein S18                                        | 304.374 | 54.61 | 17719 | 13 | 825561.5904 | 807873.5175 | 851079.1935 | 869663.3381 | 881663.6346 | 881699.7326 | 988468.1971 | 813785.2849 | 976841.1156 | 922521.2065 | 877939.067  | 933087.4139 | 878843.451  | 953231.4959 | 899719.5609 |
| P62278 | Rps13    | 40S ribosomal protein S13                                        | 301.8   | 50.33 | 17222 | 10 | 461662.8684 | 523446.2834 | 475483.6719 | 476041.7344 | 479718.1911 | 500540.5774 | 527755.964  | 524405.7725 | 518590.6543 | 485829.9611 | 504892.705  | 506303.7719 | 484166.938  | 465275.1428 | 481592.167  |
| P62281 | Rps11    | 40S ribosomal protein S11                                        | 261.042 | 61.39 | 18431 | 12 | 879060.4105 | 885825.4466 | 912834.0108 | 931056.1733 | 903588.9246 | 953937.6436 | 1012392.822 | 979491.8241 | 970621.9414 | 899170.7058 | 847226.7153 | 865174.2964 | 791656.5618 | 925467.908  | 920844.4505 |
| P62305 | Snrpe    | Small nuclear ribonucleoprotein E                                | 145.962 | 39.13 | 10804 | 3  | 46586.18944 | 47119.79011 | 33965.43577 | 46327.97676 | 39286.96213 | 27776.33119 | 30087.1868  | 29031.44116 | 38284.45325 | 35493.83252 | 49867.00537 | 51522.26738 | 51522.26738 | 50802.00012 | 38945.2387  |
| P62307 | Snrpf    | Small nuclear ribonucleoprotein F                                | 87.878  | 33.72 | 9725  | 2  | 10935.30252 | 10825.76445 | 10583.09976 | 11895.91534 | 7560.558488 | 3173.108102 | 2671.799763 | 1845.593066 | 10429.58358 | 9672.020819 | 14361.92787 | 12902.28591 | 12659.41158 | 13080.63779 | 10523.44427 |
| P62309 | Snrng    | Small nuclear ribonucleoprotein G                                | 56.483  | 26.32 | 8496  | 2  | 20061.51256 | 16845.67234 | 14112.01616 | 17186.26188 | 10102.18563 | 7167.401394 | 9118.992361 | 5969.919122 | 10281.82188 | 10090.33962 | 17502.48818 | 15211.19927 | 13405.39659 | 12546.36288 | 11582.80594 |
| P62315 | Snrpd1   | Small nuclear ribonucleoprotein Sm D1                            | 165.246 | 54.62 | 13282 | 5  | 148633.6983 | 152761.6669 | 137326.9646 | 138629.7331 | 143161.1142 | 136847.6325 | 150099.2714 | 144874.3135 | 151178.6006 | 135668.0351 | 149066.8424 | 156297.7068 | 149397.5514 | 159047.9631 | 150793.243  |
| P62317 | Snrpd2   | Small nuclear ribonucleoprotein Sm D2                            | 180.707 | 52.54 | 13527 | 7  | 259496.9922 | 264552.6384 | 244674.057  | 272814.0764 | 282329.7442 | 244995.1695 | 166500.9962 | 230348.251  | 224886.9948 | 240582.4094 | 224238.0993 | 228837.6561 | 218643.4672 | 236050.0287 | 248446.7798 |
| P62320 | Snrpd3   | Small nuclear ribonucleoprotein Sm D3                            | 137.598 | 37.3  | 13916 | 5  | 62061.48509 | 63663.89411 | 53410.76817 | 61343.48542 | 64540.52092 | 49016.26647 | 54549.37197 | 44544.73698 | 56770.95978 | 55513.85699 | 62221.66504 | 67048.46673 | 66931.54318 | 69389.96754 | 60298.30864 |
| P62329 | Tmsb4x   | Thymosin beta-4                                                  | 113.415 | 79.55 | 5053  | 5  | 154325.039  | 103576.2597 | 138677.6772 | 123933.5714 | 92713.45296 | 119525.2717 | 79054.99908 | 46460.34292 | 76927.52934 | 89923.03669 | 131697.0739 | 96150.26123 | 95027.01693 | 93259.8491  | 77237.52768 |
| P62331 | Arf6     | ADP-ribosylation factor 6                                        | 304.954 | 65.71 | 20082 | 7  | 68416.76513 | 67540.32034 | 72576.02876 | 75803.56453 | 72391.88009 | 60357.69532 | 60945.08508 | 55923.82056 | 68420.66184 | 62270.2221  | 74337.23739 | 72806.70982 | 75068.62851 | 76749.31656 | 74632.68583 |
| P62334 | Psmc6    | 26S proteasome regulatory subunit 10B                            | 454.088 | 41.39 | 44173 | 12 | 149368.31   | 152000.6913 | 143743.7719 | 146045.0289 | 149365.3853 | 154762.9918 | 158630.1282 | 167130.2937 | 155700.1435 | 147762.7781 | 149111.6449 | 156385.67   | 155245.4652 | 147259.6145 | 143041.6518 |
| P62482 | Kcnab2   | Voltage-gated potassium channel subunit beta-2                   | 87.277  | 15.8  | 41021 | 4  | 33806.04073 | 40744.4468  | 34765.35772 | 36118.21354 | 31258.25068 | 28124.42489 | 30962.86031 | 33840.12777 | 28491.80161 | 29637.34594 | 28923.84349 | 33287.1758  | 29836.6042  | 34648.18671 | 31301.9527  |
| P62634 | Cnbp     | Cellular nucleic acid-binding protein                            | 211.785 | 28.25 | 19463 | 4  | 75223.4283  | 47453.96948 | 70879.19796 | 54270.04246 | 58154.60761 | 54360.39156 | 50687.13355 | 46249.0689  | 49998.01903 | 28393.55018 | 55789.86715 | 68821.93101 | 50144.46184 | 50605.6014  | 48746.65129 |
| P62700 | Ypel5    | Protein yippee-like 5                                            | 56.819  | 18.18 | 13842 | 2  | 6532.593557 | 6225.863657 | 5697.285754 | 7339.633691 | 5814.392192 | 8678.213777 | 10246.17034 | 6195.544275 | 6638.650522 | 6679.563839 | 8104.657846 | 6954.467965 | 7248.784164 | 6852.226233 | 7237.831097 |
| P62702 | Rps4x    | 40S ribosomal protein S4, X isoform                              | 648.212 | 53.23 | 29598 | 17 | 1225627.231 | 1244866.075 | 1290529.893 | 1208005.675 | 1284462.644 | 1349253.969 | 1431170.28  | 1430294.711 | 1376513.541 | 1351027.677 | 1247539.243 | 1301904.801 | 1284696.582 | 1247443.186 | 1303024.307 |
| P62717 | Rpl18a   | 60S ribosomal protein L18a                                       | 295.801 | 50.57 | 20732 | 10 | 769774.6644 | 760279.182  | 747896.8933 | 819164.2334 | 817124.7999 | 799732.7184 | 809081.0742 | 809350.9815 | 822493.1514 | 790360.4965 | 703990.2532 | 765905.5102 | 672843.3068 | 768021.5196 | 708777.4138 |
| P62748 | Hpcal1   | Hippocalcin-like protein 1                                       | 103.422 | 23.83 | 22338 | 4  | 48342.59841 | 49431.44666 | 50538.7731  | 51290.30962 | 54481.57813 | 52322.79497 | 50357.34286 | 53216.77545 | 51246.393   | 51969.40188 | 50744.11352 | 53440.58281 | 55203.72492 | 53953.55224 | 60106.06593 |
| P62751 | Rpl23a   | 60S ribosomal protein L23a                                       | 84.407  | 24.36 | 17695 | 3  | 37601.20089 | 35373.27104 | 44287.03419 | 39466.95032 | 35562.62647 | 49611.25687 | 64390.95147 | 47442.48347 | 57551.31095 | 55749.22137 | 50485.75502 | 27897.68138 | 41974.71864 | 39584.96573 | 44644.74481 |
| P62774 | Mtpn     | Myotrophin                                                       | 279.736 | 75.42 | 12861 | 5  | 135477.9016 | 132743.2334 | 96629.35839 | 99225.31595 | 102042.1526 | 85304.74875 | 78699.47416 | 80455.93543 | 79768.00735 | 65195.60821 | 83975.51388 | 88062.14539 | 82409.20404 | 79580.19475 | 83866.82488 |
| P62804 | Hist1h4b | Histone H4                                                       | 791.118 | 58.25 | 11367 | 16 | 22229269.15 | 22419425.8  | 23545849.63 | 23641932.46 | 24828896.95 | 28224593.51 | 25272783.04 | 24773839.52 | 24664354.15 | 27296120.88 | 22794461.34 | 24474542.03 | 20954720.84 | 25166536.37 | 24789312.22 |
| P62814 | Atp6v1b2 | V-type proton ATPase subunit B, brain isoform                    | 941.299 | 57.93 | 56551 | 22 | 533283.7788 | 587463.9473 | 575390.0548 | 569842.0949 | 509078.3567 | 508842.1631 | 545589.1858 | 505400.9008 | 542635.0958 | 507066.4416 | 545156.9307 | 576853.3199 | 523111.3372 | 553752.0983 | 562888.906  |
| P62821 | Rab1A    | Ras-related protein Rab-1A                                       | 545.308 | 71.71 | 22678 | 14 | 511701.4616 | 336841.9247 | 478831.7481 | 325181.7481 | 487444.7415 | 540744.4348 | 613809.9322 | 451445.9799 | 392539.8742 | 413382.4663 | 352982.8772 | 474173.1269 | 493996.5805 | 342602.8679 |             |
| P62827 | Ran      | GTP-binding nuclear protein Ran                                  | 469.364 | 47.22 | 24423 | 12 | 1023432.332 | 1090310.747 | 1161477.27  | 1147755.779 | 1089697.516 | 1023344.946 | 1072256.644 | 1129321.616 | 1100272.333 | 1080565.331 | 1126908.589 | 1127337.979 | 1106438.199 | 1136915.748 | 1108854.848 |
| P62830 | Rpl23    | 60S ribosomal protein L23                                        | 191.96  | 50    | 14865 | 7  | 469075.5205 | 495293.8599 | 480945.4838 | 459242.8771 | 474210.0872 | 435420.1599 | 441547.5124 | 452447.3795 | 425135.6617 | 440579.741  | 458009.4292 | 433576.5206 | 438160.279  | 422294.9824 | 425341.7353 |
| P62835 | Rap1a    | Ras-related protein Rap-1A                                       | 541.167 | 66.3  | 20987 | 12 | 485201.0134 | 491143.2734 | 434488.5099 | 459457.9211 | 471983.1656 | 459317.9778 | 477310.8174 | 484866.4744 | 500639.8164 | 485000.5397 | 447755.2313 | 441444.9097 | 472749.1512 | 479505.331  | 490556.2482 |
| P62843 | Rps15    | 40S ribosomal protein S15                                        | 111.328 | 28.28 | 17040 | 3  | 3620.993991 | 2567.751627 | 1253.381255 | 1850.343665 | 1927.037135 | 399.1711459 | 1180.700524 | 727.442151  | 1650.806459 | 669.5563781 | 2365.674892 | 3276.48064  | 1857.534569 | 1247.943823 | 1168.033994 |
| P62849 | Rps24    | 40S ribosomal protein S24                                        | 122.541 | 20.3  | 15423 | 3  | 38290.68708 | 44866.68557 | 36593.03547 | 39409.73639 | 34762.10283 | 44337.59892 | 50058.47583 | 57344.84644 | 60885.05094 | 44282.78822 | 26031.85322 | 44962.31171 | 40686.44949 | 36949.134   | 45603.43557 |
| P62852 | Rps25    | 40S ribosomal protein S25                                        | 129.882 | 24    | 13742 | 3  | 322585.0212 | 324080.9196 | 335990.8331 | 305364.1757 | 326385.6481 | 349421.4629 | 390537.0032 | 359290.6255 | 322215.2204 | 329644.0562 | 304841.374  | 310168.738  | 317018.1399 | 306699.5145 | 332408.2593 |
| P62855 | Rps26    | 40S ribosomal protein S26                                        | 110.364 | 31.3  | 13015 | 3  | 154537.7062 | 158849.1695 | 155097.1013 | 160045.7275 | 166842.1223 | 167500.1614 | 179910.3895 | 181063.1679 | 174800.4619 | 175542.1212 | 156897.9893 | 172213.2372 | 161208.881  | 150135.4567 | 167030.3056 |
| P62869 | Elob     | Elongin-B                                                        | 274.104 | 59.32 | 13170 | 7  | 116579.8073 | 125218.3204 | 108733      |             |             |             |             |             |             |             |             |             |             |             |             |



|        |          |                                                                         |          |        |       |    |             |             |             |             |             |             |             |             |             |             |             |             |             |             |             |
|--------|----------|-------------------------------------------------------------------------|----------|--------|-------|----|-------------|-------------|-------------|-------------|-------------|-------------|-------------|-------------|-------------|-------------|-------------|-------------|-------------|-------------|-------------|
| P63017 | Hspa8    | Heat shock cognate 71 kDa protein                                       | 2230.44  | 77.24  | 70871 | 50 | 7254732.22  | 6641433.994 | 7507439.867 | 6938701.48  | 6574808.099 | 7183537.038 | 7948781.94  | 8114026.064 | 7127088.619 | 7552524.679 | 7255460.024 | 6756531.979 | 7262750.674 | 7714288.799 | 6610381.462 |
| P63024 | Vamp3    | Vesicle-associated membrane protein 3                                   | 185.691  | 54.37  | 11480 | 3  | 25914.45349 | 28662.68232 | 25516.53504 | 24181.96025 | 21051.11345 | 17188.07849 | 18887.24736 | 15102.97125 | 19587.1611  | 16433.43594 | 26133.96028 | 15206.47143 | 24245.39595 | 23548.0445  | 23195.051   |
| P63028 | Tpt1     | Translationally-controlled tumor protein                                | 244.371  | 58.14  | 19462 | 7  | 163610.7453 | 160094.6238 | 152558.4478 | 157371.4703 | 133325.3538 | 142195.2108 | 151725.8124 | 132550.9117 | 151065.5605 | 154318.8276 | 173381.694  | 173422.2593 | 167758.0096 | 156159.231  | 146918.7891 |
| P63036 | Dnaaj1   | DnaJ homolog subfamily A member 1                                       | 114.421  | 14.36  | 44868 | 3  | 9523.455662 | 9957.663411 | 11067.20449 | 12885.50608 | 7344.760717 | 12452.40947 | 15262.56889 | 15357.17322 | 17614.24308 | 12779.5072  | 11151.09213 | 12345.9114  | 13412.75283 | 12351.47836 | 12908.02367 |
| P63038 | Hspd1    | 60 kDa heat shock protein, mitochondrial                                | 2093.763 | 71.38  | 60955 | 46 | 2070205.336 | 2161308.408 | 2081075.181 | 2102953.883 | 2031791.779 | 2375451.726 | 2331564.998 | 2351947.835 | 2450561.528 | 2246277.332 | 2240080.836 | 2197287.033 | 2100863.821 | 2189367.462 | 2120341.994 |
| P63073 | Elf4e    | Eukaryotic translation initiation factor 4E                             | 71.205   | 15.21  | 25053 | 4  | 67519.99997 | 70726.27532 | 59693.71863 | 69419.75188 | 72733.52431 | 72081.84077 | 59021.53857 | 64906.51077 | 72837.36934 | 51771.15088 | 69842.13655 | 68855.43344 | 69238.61597 | 69695.79716 | 66146.41676 |
| P63081 | Atp6v0c  | V-type proton ATPase 16 kDa proteolipid subunit c                       | 144.756  | 31.61  | 15808 | 2  | 6432.16699  | 10655.03347 | 4981.106376 | 8374.402436 | 5357.715884 | 1005.507099 | 2135.049072 | 1788.902697 | 5312.990423 | 1289.469951 | 8664.397056 | 7326.98839  | 7402.821485 | 5575.846109 | 1733.940361 |
| P63085 | Mapk1    | Mitogen-activated protein kinase 1                                      | 445.944  | 63.69  | 41276 | 15 | 250293.1873 | 243151.123  | 201776.7023 | 219707.1683 | 236194.084  | 192271.2251 | 187334.6626 | 196261.4459 | 206277.8782 | 189775.0606 | 237893.9216 | 236277.7322 | 232088.1323 | 245771.0512 | 226771.3585 |
| P63087 | Ppp1cc   | Serine/threonine-protein phosphatase PP1-gamma catalytic subunit        | 538.526  | 44.58  | 36984 | 11 | 226765.6215 | 228326.943  | 198744.8265 | 214954.7391 | 202651.6913 | 174058.0617 | 189051.1499 | 188517.662  | 193034.7278 | 156147.676  | 179672.2249 | 210768.9853 | 189353.7905 | 195029.1462 | 205375.6891 |
| P63094 | Gnas     | Guanine nucleotide-binding protein G(s) subunit alpha isoforms short    | 242.821  | 27.41  | 45664 | 7  | 37262.35403 | 41092.20071 | 38850.84679 | 36840.17658 | 35533.31573 | 30040.85224 | 37032.56444 | 35931.72943 | 24406.07168 | 34026.02119 | 27367.92117 | 38266.34921 | 38070.74823 | 36430.78001 | 35783.39236 |
| P63101 | Ywhaz    | 14-3-3 protein zeta/delta                                               | 843.291  | 74.69  | 27771 | 26 | 2635142.4   | 2617051.28  | 2691206.227 | 2734494.128 | 2826770.615 | 2524523.985 | 2693128.715 | 2607072.92  | 2628293.843 | 2590161.934 | 2711388.158 | 2745507.91  | 2920914.801 | 2930596.817 | 2669797.49  |
| P63158 | Hmgb1    | High mobility group protein B1                                          | 259.891  | 35.81  | 24894 | 9  | 410421.6838 | 361048.3066 | 346434.0539 | 366481.3825 | 377842.6038 | 281231.1995 | 282799.7279 | 260918.2383 | 275377.4028 | 272192.5183 | 364402.8403 | 316967.7665 | 315915.2386 | 336998.6857 | 263188.1193 |
| P63174 | Rpl38    | 60S ribosomal protein L38                                               | 79.745   | 48.57  | 8218  | 3  | 128930.9341 | 131755.1062 | 140042.1601 | 133520.4929 | 133629.9424 | 129255.6908 | 144518.7983 | 146154.1006 | 140497.4061 | 128796.0441 | 130224.6996 | 128649.3509 | 129375.9911 | 128287.5589 | 140980.4469 |
| P63213 | Gng2     | Guanine nucleotide-binding protein G(i)/G(s)/G(o) subunit gamma-2       | 99.828   | 49.3   | 7850  | 3  | 38632.1129  | 38399.98828 | 31224.01186 | 33132.1343  | 36966.9835  | 27150.92534 | 25445.12372 | 23309.28552 | 27286.59554 | 25706.66868 | 27979.18161 | 30571.99337 | 29572.63318 | 29276.98818 | 32256.22477 |
| P63242 | Elf5a    | Eukaryotic translation initiation factor 5A-1                           | 567.836  | 85.06  | 16832 | 15 | 725526.0622 | 701617.4024 | 703087.6078 | 680876.7567 | 673957.7425 | 731552.2256 | 696369.9818 | 731047.7442 | 730547.9538 | 646566.2549 | 815632.8622 | 826157.7925 | 758882.6324 | 755439.3681 | 676003.1475 |
| P63245 | Rack1    | Receptor of activated protein C kinase 1                                | 898.447  | 82.02  | 35077 | 20 | 863206.0248 | 936533.3193 | 905098.1114 | 896062.7635 | 901699.0186 | 834006.3988 | 924300.3888 | 959908.8355 | 891373.8701 | 716553.9802 | 739927.8218 | 874522.2993 | 783474.9515 | 838346.9556 | 841213.8738 |
| P63259 | Actg1    | Actin, cytoplasmic 2                                                    | 3229.127 | 90.93  | 41793 | 61 | 45683648.91 | 46558465.07 | 49444768.71 | 48934905.39 | 46675426.9  | 50742744.25 | 49683178.67 | 50682547.87 | 50831382.03 | 49981579.89 | 49403852.07 | 50235340.97 | 52915281.65 | 51403618.73 | 49621394.87 |
| P63276 | Rps17    | 40S ribosomal protein S17                                               | 395.75   | 59.26  | 15524 | 10 | 240727.9007 | 216026.7041 | 194152.0689 | 227061.6964 | 214567.3072 | 173922.0128 | 172996.2072 | 172724.6081 | 194175.5324 | 182088.6734 | 217477.4643 | 190480.767  | 187892.1187 | 189032.4084 | 161410.1007 |
| P63280 | Ube2i    | SUMO-conjugating enzyme UBC9                                            | 104.874  | 34.18  | 18007 | 4  | 70289.03381 | 65907.2696  | 57579.15044 | 62805.32724 | 69653.89698 | 54973.10234 | 62407.34816 | 55485.94198 | 49986.20148 | 52990.94366 | 59092.77405 | 60737.80938 | 60725.92335 | 59192.90813 | 60199.82252 |
| P63321 | Rala     | Ras-related protein Ral-A                                               | 134.332  | 17.96  | 23553 | 5  | 38485.42911 | 46972.86372 | 13379.35666 | 44371.50981 | 47295.41809 | 29329.03637 | 29129.08413 | 24215.95544 | 36988.99334 | 38165.15938 | 55356.33001 | 44590.56966 | 46216.96079 | 48246.39597 | 40411.22471 |
| P63323 | Rps12    | 40S ribosomal protein S12                                               | 225.662  | 45.45  | 14525 | 6  | 170966.6192 | 177269.1119 | 166223.4574 | 151511.7221 | 170665.0324 | 158201.7997 | 151608.6377 | 149227.027  | 137688.8466 | 131502.1733 | 127539.9791 | 139482.7462 | 126840.058  | 140438.6054 | 140306.3671 |
| P63325 | Rps10    | 40S ribosomal protein S10                                               | 282.041  | 42.42  | 18916 | 7  | 322339.317  | 300215.1759 | 288927.7542 | 321891.8802 | 218811.5777 | 242119.0954 | 353808.1464 | 242526.9771 | 253002.1844 | 351993.0654 | 298399.9489 | 299124.2929 | 242850.9953 | 345696.816  | 243712.4631 |
| P63328 | Ppp3ca   | Serine/threonine-protein phosphatase 2B catalytic subunit alpha isoform | 225.344  | 23.22  | 58644 | 9  | 88463.34483 | 81359.36455 | 90622.69481 | 94126.77845 | 83962.29718 | 70327.11235 | 79605.15447 | 69922.854   | 74618.06785 | 77171.40864 | 83281.40548 | 77713.20858 | 79519.11676 | 91364.288   | 84783.64075 |
| P63330 | Ppp2ca   | Serine/threonine-protein phosphatase 2A catalytic subunit alpha isoform | 466.987  | 58.25  | 35608 | 12 | 225674.5297 | 205217.6828 | 217273.8356 | 230094.6171 | 203527.5086 | 219970.9097 | 238447.1208 | 218796.2579 | 210372.1646 | 200391.4493 | 200652.3178 | 230119.9688 | 200822.6956 | 228281.8916 | 213660.4791 |
| P67778 | Phb      | Prohibitin                                                              | 743.077  | 79.04  | 29820 | 18 | 789840.8022 | 776765.3692 | 744246.6827 | 782035.2771 | 811978.2777 | 814216.5686 | 891990.2805 | 942081.8605 | 836796.6915 | 903823.5003 | 758999.1267 | 819240.1514 | 836938.4634 | 782363.9121 | 718747.1184 |
| P67871 | Csnk2b   | Casein kinase II subunit beta                                           | 41.906   | 9.3    | 24942 | 2  | 28388.9475  | 32008.42359 | 29765.57805 | 26326.22848 | 28205.87356 | 28814.26204 | 31231.21735 | 34286.78253 | 31370.76823 | 25682.40929 | 24495.81159 | 29738.92264 | 27296.14803 | 30199.58649 | 30436.73876 |
| P67984 | Rpl22    | 60S ribosomal protein L22                                               | 150.378  | 39.06  | 14759 | 3  | 208956.4445 | 220124.641  | 202773.8742 | 204709.4241 | 209657.8994 | 222070.2241 | 241994.9856 | 228190.8384 | 234472.504  | 204674.5421 | 207465.335  | 221896.7563 | 221166.8905 | 218195.4382 | 211797.3032 |
| P68033 | Actc1    | Actin, alpha cardiac muscle 1                                           | 1232.137 | 40.58  | 42019 | 30 | 30883565.57 | 31568136.88 | 34101114.26 | 34015998.46 | 31879220.93 | 34460454.32 | 33854861.1  | 35023828.51 | 35554584.5  | 34391247.8  | 35558471.21 | 35415555.86 | 37227043.15 | 36470978.2  | 34639316.05 |
| P68037 | Ube2i3   | Ubiquitin-conjugating enzyme E2 L3                                      | 192.778  | 51.95  | 17862 | 4  | 75302.31866 | 72626.58939 | 66223.80806 | 70560.45833 | 67274.68934 | 57465.96912 | 60491.80347 | 55434.63189 | 62241.21174 | 58962.3668  | 56488.31257 | 69360.61462 | 65121.5648  | 56315.75533 | 66003.60359 |
| P68101 | Elf2s1   | Eukaryotic translation initiation factor 2 subunit 1                    | 535.04   | 54.6   | 36108 | 15 | 502383.9523 | 512552.2303 | 497302.2375 | 500336.6115 | 494055.8194 | 402204.9769 | 486557.1572 | 481065.0002 | 437575.9435 | 402386.7691 | 484280.2852 | 505987.6408 | 471109.713  | 516422.9708 | 460242.5394 |
| P68181 | Prkab    | cAMP-dependent protein kinase catalytic subunit beta                    | 264.71   | 23.65  | 40708 | 8  | 106543.6371 | 107281.5938 | 105972.7762 | 109862.1179 | 116281.1278 | 115820.3782 | 117325.5814 | 123217.4451 | 121322.787  | 113892.3401 | 109404.2154 | 105648.3051 | 117765.1024 | 118648.0784 | 108901.9655 |
| P68254 | Ywhaq    | 14-3-3 protein theta                                                    | 725.598  | 59.18  | 27778 | 20 | 1321709.38  | 1271993.005 | 1343918.874 | 1308244.003 | 1409688.82  | 1381496.73  | 1421678.65  | 1379952.992 | 1412103.852 | 1339772.438 | 1296012.17  | 1361749.293 | 1490394.215 | 1517661.267 | 1414328.169 |
| P68368 | Tuba4a   | Tubulin alpha-4A chain                                                  | 1509.436 | 79.02  | 49924 | 34 | 3926805.247 | 4120369.015 | 3993224.395 | 4099905.94  | 4004753.646 | 3698265.229 | 3817009.377 | 3202968.601 | 4126838.559 | 3869220.201 | 3682157.294 | 3935444.763 | 3958857.337 | 3951018.471 | 4126241.323 |
| P68369 | Tuba1a   | Tubulin alpha-1A chain                                                  | 1741.793 | 89.36  | 50136 | 39 | 5484605.041 | 6266720.53  | 6188243.593 | 6316326.615 | 6043157.046 | 5677671.023 | 6105751.04  | 5038005.02  | 5955168.291 | 5988959.599 | 5603677.873 | 6217242.911 | 6213665.264 | 6322254.944 | 6327552.119 |
| P68372 | Tubb4b   | Tubulin beta-4B chain                                                   | 2065.138 | 82.195 | 49831 | 45 | 6047252.029 | 6055366.862 | 6283495.535 | 6323338.915 | 5821995.459 | 5172406.406 | 5346120.332 | 4793537.105 | 5462352.093 | 5523727.224 | 6259144.724 | 6263497.317 | 5828558.042 | 6207572.832 | 5305562.69  |
| P68373 | Tuba1c   | Tubulin alpha-1C chain                                                  | 1691.767 | 89.76  | 49909 | 39 | 5700044.344 | 6511318.82  | 6402573.091 | 6572348.025 | 6247599.114 | 5829210.322 | 6376156.938 | 5350136.167 | 6255072.153 | 6260387.693 | 5889688.611 | 6459089.066 | 6537138.113 | 6439373.897 | 6621564.081 |
| P68433 | Hist1h3a | Histone H3.1                                                            | 348.982  | 55.15  | 15404 | 12 | 17584898.72 | 18020336.88 | 19053631.2  | 19805848.51 | 19148594.13 | 20962015.35 | 18427241.05 | 18760645.03 | 18726408.46 | 12143335.88 | 19345845.17 | 18462912.59 | 15913431.21 | 19939114.2  | 19106214.24 |
| P68510 | Ywhah    | 14-3-3 protein eta                                                      | 683.02   | 71.95  | 28212 | 23 | 1512462.828 | 149990.467  | 1504783.616 | 1458079.88  | 1586088.78  | 1542223.24  | 1598724.946 | 1549197.488 | 1544060.623 | 1485207.567 | 1504442.665 | 1573218.75  | 1658681.354 | 1623532.327 | 1586296.829 |
| P68997 | Tubb5    | Tubulin beta-5 chain                                                    | 2252.156 | 83.11  | 49671 | 46 | 7106101.689 | 7055790.971 | 7301463.88  | 7471537.025 | 6840413.291 | 6127160.823 | 6236331.116 | 5651002.253 | 6348682.234 | 6503893.924 | 7338270.416 | 7331243.96  | 7331243.96  | 6915321.167 | 7251816.601 |
| P70122 | Sbds     | Ribosome maturation protein SBDS                                        | 45.375   | 7.2    | 28781 | 2  |             |             |             |             |             |             |             |             |             |             |             |             |             |             |             |

|        |           |                                                                            |          |       |        |    |             |             |             |             |             |             |             |             |              |             |             |             |             |             |              |
|--------|-----------|----------------------------------------------------------------------------|----------|-------|--------|----|-------------|-------------|-------------|-------------|-------------|-------------|-------------|-------------|--------------|-------------|-------------|-------------|-------------|-------------|--------------|
| P70290 | Mpp1      | 55 kDa erythrocyte membrane protein                                        | 243.144  | 25.54 | 52227  | 6  | 52723.94872 | 37963.87889 | 33982.5346  | 38336.12115 | 40527.09308 | 32214.0161  | 38090.54157 | 43839.98341 | 31985.17824  | 33574.04393 | 43701.19399 | 35311.59585 | 48884.60951 | 40867.87423 | 38369.23321  |
| P70296 | Pebp1     | Phosphatidylethanolamine-binding protein 1                                 | 253.167  | 62.03 | 20830  | 6  | 118241.2227 | 119339.3287 | 105050.8753 | 97339.04004 | 90461.84125 | 91566.42242 | 91110.90696 | 84599.80563 | 82638.07757  | 87317.44829 | 107795.0278 | 113260.748  | 102393.7453 | 98711.4478  | 89405.18432  |
| P70303 | Ctps2     | CTP synthase 2                                                             | 67.172   | 7.68  | 65514  | 3  | 11237.50723 | 8873.630823 | 10786.39327 | 12941.47274 | 10832.44533 | 9004.653211 | 12534.76781 | 11245.4725  | 10845.79433  | 8298.652937 | 8993.241202 | 10341.04576 | 10562.96175 | 7605.008171 | 10492.98138  |
| P70315 | Was       | Wiskott-Aldrich syndrome protein homolog                                   | 167.146  | 14.04 | 54192  | 4  | 31204.47246 | 33508.76905 | 30477.68305 | 30708.87651 | 29905.37135 | 25117.48896 | 26853.5351  | 25062.49049 | 24036.03608  | 17197.45356 | 30410.95081 | 29499.85212 | 29654.40052 | 27775.93611 | 30642.83594  |
| P70333 | Hnmp2     | Heterogeneous nuclear ribonucleoprotein H2                                 | 330.103  | 25.17 | 49280  | 8  | 361028.5947 | 370196.5306 | 411542.2583 | 416449.3703 | 395860.6554 | 373533.074  | 352764.3299 | 360258.7548 | 335271.32    | 357056.548  | 383423.9356 | 351436.5982 | 327715.854  | 351698.7925 | 346406.8399  |
| P70336 | Rock2     | Rho-associated protein kinase 2                                            | 112.459  | 4.68  | 160586 | 5  | 30565.751   | 28387.61835 | 30600.11372 | 19485.00016 | 25598.30297 | 17503.21046 | 19847.61443 | 29864.43874 | 22591.95504  | 22481.31862 | 26720.86019 | 21755.91287 | 27019.61572 | 27919.39587 | 27334.48813  |
| P70340 | Smad1     | Mothers against decapentaplegic homolog 1                                  | 42.288   | 8.17  | 52157  | 2  | 7173.510427 | 7732.049196 | 6532.041345 | 7327.372476 | 7182.083405 | 4834.174773 | 4585.760953 | 5963.422041 | 4304.779807  | 4065.751886 | 5346.848679 | 1137.233016 | 5086.31883  | 5430.00278  | 5848.417637  |
| P70388 | Rad50     | DNA repair protein RAD50                                                   | 122.379  | 5.11  | 153488 | 5  | 17960.07875 | 20625.83468 | 15972.87758 | 17994.65913 | 18814.86384 | 19846.92207 | 17246.34199 | 18747.42201 | 19036.79907  | 18633.96245 | 17306.3969  | 19711.28856 | 22165.72149 | 18941.61206 | 17815.01615  |
| P70398 | Usp9x     | Probable ubiquitin carboxyl-terminal hydrolase FAF-X                       | 209.335  | 5.47  | 290711 | 10 | 28095.68481 | 27100.87899 | 22788.05175 | 29400.11646 | 28335.70747 | 26559.09008 | 28445.47877 | 27525.62516 | 28885.68982  | 22645.01706 | 24971.06539 | 31031.48798 | 27723.86468 | 19456.26862 | 25287.31383  |
| P70452 | Stx4      | Syntaxin-4                                                                 | 115.23   | 17.45 | 34165  | 4  | 21587.2119  | 33300.64381 | 19280.371   | 28259.71953 | 22898.86769 | 28162.72818 | 29068.81431 | 77558.15075 | 20665.79218  | 60716.27578 | 21036.58284 | 18374.5107  | 22095.09276 | 19903.30171 | 23669.54254  |
| P70460 | Vasp      | Vasodilator-stimulated phosphoprotein                                      | 226.347  | 28.8  | 39667  | 8  | 132098.3529 | 138125.0953 | 141309.4232 | 142985.4295 | 150407.3795 | 140121.9226 | 152372.9218 | 150786.7437 | 138841.668   | 134570.9046 | 132738.329  | 132681.1545 | 139804.5929 | 137091.0586 | 137888.94    |
| P70665 | Siae      | Sialate O-acetyltransferase                                                | 82.931   | 7.39  | 60775  | 3  | 21091.29139 | 20012.54735 | 18556.38099 | 19555.63829 | 19046.91543 | 15332.83643 | 12324.60295 | 12466.74657 | 13192.93182  | 13005.54578 | 19471.72899 | 17693.5142  | 17162.10279 | 17369.31475 | 18635.88491  |
| P70670 | Naca      | Nascent polypeptide-associated complex subunit alpha, muscle-specific form | 297.931  | 3.2   | 220499 | 6  | 152363.8971 | 169354.3481 | 172182.2195 | 179001.2064 | 159274.2821 | 181486.8814 | 196205.6829 | 213466.6315 | 210141.7586  | 181635.7604 | 170666.1396 | 194707.2905 | 179897.3995 | 179346.3743 | 177397.2596  |
| P70677 | Casp3     | Caspase-3                                                                  | 121.249  | 19.13 | 31475  | 4  | 37393.46047 | 36288.73575 | 30132.49444 | 33998.89071 | 32775.74253 | 29055.3719  | 33330.27581 | 30609.44887 | 30830.7949   | 40399.69732 | 35507.10118 | 29643.96965 | 31208.32338 | 33737.38518 | 32041.60097  |
| P70697 | Urod      | Uroporphyrinogen decarboxylase                                             | 260.78   | 23.16 | 40692  | 5  | 26983.95935 | 29225.1937  | 22695.02574 | 28896.96908 | 27783.53156 | 22321.28379 | 25924.81871 | 25877.87669 | 27830.62587  | 19320.66637 | 22412.05814 | 22082.89218 | 21657.60867 | 28411.17045 | 24993.6271   |
| P70698 | Ctsp1     | CTP synthase 1                                                             | 167.691  | 10.15 | 66682  | 4  | 6960.98873  | 11653.9851  | 14844.75931 | 14901.09226 | 11135.50065 | 18625.99013 | 27326.83817 | 21945.02534 | 13788.97206  | 6313.33822  | 13036.51438 | 15180.69589 | 13595.01239 | 5737.000245 | 18084.37144  |
| P70699 | Gaa       | Lysosomal alpha-glucosidase                                                | 332.592  | 16.68 | 106248 | 10 | 49665.26151 | 45476.77718 | 42613.9354  | 40474.72163 | 37530.26872 | 26548.60325 | 40694.12163 | 34588.84209 | 46934.5391   | 22486.90977 | 46567.90442 | 45357.42577 | 43216.59123 | 34481.85915 | 36134.80733  |
| P80313 | Cct7      | T-complex protein 1 subunit eta                                            | 989.804  | 56.43 | 59652  | 27 | 950563.0614 | 954641.796  | 969161.4041 | 977095.7005 | 955955.257  | 968661.1097 | 1004941.753 | 996775.1204 | 1027885.112  | 896203.9272 | 887631.0775 | 968323.0972 | 892529.6774 | 938583.2476 | 912720.1433  |
| P80314 | Cct2      | T-complex protein 1 subunit beta                                           | 1589.566 | 77.2  | 57477  | 38 | 792356.3498 | 804696.1534 | 783553.3018 | 841158.3522 | 749181.1587 | 765144.2222 | 833067.9852 | 805718.8098 | 850628.3028  | 377766.0582 | 774483.8521 | 808233.6015 | 790552.3262 | 781655.8214 | 772583.8217  |
| P80315 | Cct4      | T-complex protein 1 subunit delta                                          | 953.883  | 60.48 | 58066  | 27 | 665821.887  | 726370.0359 | 707736.6641 | 683549.8032 | 703731.697  | 724996.3464 | 787840.8954 | 812525.4588 | 777499.307   | 711911.5221 | 644777.9938 | 753533.2855 | 677002.1652 | 701110.6215 | 683203.1812  |
| P80316 | Cct5      | T-complex protein 1 subunit epsilon                                        | 1043.203 | 59.15 | 59624  | 28 | 511161.3862 | 624896.5153 | 565050.5091 | 558116.5087 | 590470.7157 | 602096.8594 | 570328.2912 | 602835.7484 | 558241.66    | 536232.909  | 575545.6231 | 599769.4911 | 586807.3172 | 576167.33   | 549697.0279  |
| P80317 | Cct6a     | T-complex protein 1 subunit zeta                                           | 846.636  | 56.12 | 58004  | 24 | 775010.3649 | 787014.439  | 822974.3442 | 815616.0165 | 802754.4388 | 837942.2644 | 903776.7309 | 921703.3501 | 893413.1591  | 850277.308  | 784573.732  | 876302.5021 | 823655.2186 | 858617.3382 | 839755.1849  |
| P80318 | Cct3      | T-complex protein 1 subunit gamma                                          | 682.785  | 46.61 | 60630  | 25 | 971476.7727 | 884346.1775 | 952331.9694 | 943855.2188 | 917278.245  | 819272.2314 | 995524.3128 | 974227.6718 | 950871.1138  | 848005.044  | 841023.5042 | 949664.4068 | 837871.0354 | 983414.3919 | 882196.7811  |
| P80349 | Fucitin-3 | Fucitin-3                                                                  | 52.309   | 84.62 | 4480   | 2  | 10457.15398 | 11071.57321 | 11282.35329 | 6233.705757 | 15600.92326 | 12998.75152 | 9351.34199  | 7060.761679 | 12720.37321  | 4959.346615 | 11793.45088 | 11474.44964 | 11847.74165 | 10150.33564 | 5072.793489  |
| P81117 | Nucb2     | Nucleobindin-2                                                             | 156.708  | 12.38 | 50304  | 4  | 21601.62966 | 16711.46593 | 21507.46053 | 30342.9082  | 19131.59295 | 31188.68398 | 23419.62666 | 29049.51252 | 32147.8448   | 31150.20282 | 25600.18285 | 25174.54223 | 23753.44282 | 28949.93122 | 21703.55377  |
| P81155 | Vdac2     | Voltage-dependent anion-selective channel protein 2                        | 562.666  | 50.51 | 31746  | 12 | 918795.6503 | 921362.6294 | 1014538.089 | 923867.2019 | 1020008.985 | 1318468.91  | 1192124.27  | 1306582.912 | 1302524.546  | 1168293.893 | 939823.7036 | 1077399.338 | 985408.7803 | 1017113.836 | 1118894.507  |
| P81795 | Eif2s3    | Eukaryotic translation initiation factor 2 subunit 3, X-linked             | 382.992  | 37.29 | 51079  | 12 | 394804.3152 | 418080.6881 | 414129.9449 | 448677.6923 | 401271.3213 | 359588.8248 | 427277.0724 | 438516.167  | 399289.8529  | 350660.8336 | 405488.4768 | 423136.3329 | 388784.506  | 403322.1609 | 394924.9197  |
| P82343 | Renbp     | N-acylglucosamine 2-epimerase                                              | 160.661  | 19.77 | 49771  | 5  | 45728.96416 | 51993.26414 | 44512.80439 | 44143.78214 | 41288.32496 | 31957.42499 | 44946.09024 | 40846.62933 | 389803.07843 | 32336.67849 | 41307.83035 | 41335.64846 | 42607.61526 | 42226.16866 | 44274.83646  |
| P83732 | Rpl24     | 60S ribosomal protein L24                                                  | 113.715  | 24.2  | 17779  | 4  | 92218.46126 | 96912.19088 | 99131.23698 | 77664.45482 | 93150.93181 | 117512.9853 | 145749.6325 | 151328.6033 | 159250.2662  | 134489.385  | 79804.08033 | 87430.73457 | 103662.5016 | 90636.49974 | 118050.1616  |
| P83741 | Wnk1      | Serine/threonine-protein kinase WNK1                                       | 164.924  | 3.32  | 250934 | 7  | 70002.15681 | 72943.45461 | 69934.14516 | 70483.2835  | 72728.01116 | 72225.8066  | 70827.75412 | 73526.10303 | 76865.94032  | 73712.28264 | 69967.74923 | 65784.43598 | 72552.353   | 73357.02494 | 75055.58768  |
| P83868 | Ptges3    | Prostaglandin E synthase 3                                                 | 136.366  | 26.25 | 18721  | 3  | 59109.06979 | 60019.57354 | 56303.57095 | 57447.97661 | 62246.44336 | 52066.34562 | 29496.86799 | 57659.47316 | 53094.54703  | 39416.49104 | 21392.14009 | 27222.91621 | 47470.30313 | 54083.69039 | 56829.73439  |
| P83870 | Phf5a     | PHD finger-like domain-containing protein 5A                               | 32.466   | 21.82 | 12405  | 2  | 4779.614969 | 4215.844914 | 3361.272006 | 3514.456607 | 3622.616788 | 0.014539799 | 3108.397044 | 3006.170767 | 0.012083387  | 2458.462342 | 3449.949698 | 2598.821978 | 2667.639501 | 2340.442445 | 0.010360417  |
| P83882 | Rpl36a    | 60S ribosomal protein L36a                                                 | 35.662   | 16.04 | 12441  | 2  | 44463.14504 | 54483.88525 | 45922.18842 | 51473.08054 | 69145.66237 | 53452.98812 | 51399.51394 | 59185.89305 | 50571.07667  | 48277.30914 | 37467.6599  | 47481.10323 | 39068.17241 | 43409.54446 | 51977.72335  |
| P83917 | Cbx1      | Chromobox protein homolog 1                                                | 135.822  | 18.92 | 21418  | 3  | 44223.61883 | 42407.08927 | 41268.62919 | 43362.36284 | 37914.54437 | 34755.6312  | 30585.12975 | 31116.7766  | 34411.09035  | 35818.58201 | 45787.98496 | 45229.2896  | 43173.224   | 41345.2728  | 35178.31295  |
| P83940 | Eloc      | Elongin-C                                                                  | 181.167  | 37.5  | 12473  | 3  | 36856.99313 | 36969.23217 | 37868.7172  | 35794.98946 | 31729.21866 | 28774.41209 | 28831.90883 | 24899.92114 | 25001.46697  | 26899.41982 | 41030.07193 | 32836.64099 | 30213.96777 | 30856.96286 | 28856.10432  |
| P83953 | Kpna1     | Importin subunit alpha-5                                                   | 161.023  | 17.29 | 60137  | 5  | 14014.76328 | 15667.70982 | 15343.05952 | 15883.3679  | 13008.32524 | 14519.27286 | 14888.07054 | 16381.4606  | 17630.2294   | 10866.60349 | 13632.72198 | 16325.65443 | 14209.0664  | 13361.39297 | 14429.96499  |
| P84082 | Arf2      | ADP-ribosylation factor 2                                                  | 569.006  | 58.56 | 20746  | 13 | 508497.2053 | 458649.5394 | 460406.6488 | 488433.913  | 485709.4179 | 475932.9556 | 462411.5931 | 464632.1601 | 513768.2712  | 473090.481  | 505969.3161 | 505061.2021 | 513725.5308 | 562818.988  | 530385.7096  |
| P84083 | Arf5      | ADP-ribosylation factor 5                                                  | 418.744  | 67.78 | 20530  | 10 | 382333.6844 | 329739.6636 | 350190.6615 | 361351.7641 | 335473.6955 | 363085.2976 | 363080.7885 | 408613.4193 | 384406.4794  | 369091.5766 | 379300.9495 | 364960.6399 | 377247.2141 | 405477.1094 | 3947467.2379 |
| P84091 | Ap2m1     | AP-2 complex subunit mu                                                    | 228.23   | 30.8  | 49655  | 11 | 138327.1531 | 150604.2458 | 157192.4404 | 139839.0532 | 135499.5226 | 123992.9377 | 150225.7568 | 155375.4626 | 135265.4204  | 138171.5509 | 130640.1202 | 152130.3085 | 148922.1701 | 148650.538  | 146892.7119  |
| P84096 | Rhog      | Rho-related GTP-binding protein RhoG                                       | 411.779  | 51.83 | 21309  | 9  | 435890.1218 | 425306.1528 | 397003.002  | 411858.3525 | 425381      |             |             |             |              |             |             |             |             |             |              |

|        |          |                                                                                                                   |          |       |        |    |             |             |             |             |             |             |             |             |             |             |             |             |             |             |             |
|--------|----------|-------------------------------------------------------------------------------------------------------------------|----------|-------|--------|----|-------------|-------------|-------------|-------------|-------------|-------------|-------------|-------------|-------------|-------------|-------------|-------------|-------------|-------------|-------------|
| P97369 | Ncf4     | Neutrophil cytosol factor 4                                                                                       | 586.392  | 54.87 | 38707  | 15 | 208428.429  | 192084.4438 | 204249.6612 | 210970.5182 | 184473.3316 | 225097.0323 | 199104.3513 | 216522.3665 | 205133.9197 | 233302.2612 | 204119.6011 | 204240.8203 | 205310.9487 | 242005.7827 | 202090.7118 |
| P97370 | Atp1b3   | Sodium/potassium-transporting ATPase subunit beta-3                                                               | 164.942  | 28.42 | 31776  | 6  | 139790.8649 | 142871.7816 | 123990.8459 | 136110.0916 | 142118.0124 | 143466.9634 | 136554.9463 | 131026.6755 | 137389.8007 | 123199.3012 | 122229.0999 | 145829.5869 | 141453.4699 | 138599.8107 | 153282.6232 |
| P97371 | Psme1    | Proteasome activator complex subunit 1                                                                            | 446.188  | 56.22 | 28673  | 12 | 187026.7456 | 210760.7067 | 223906.1471 | 210592.2835 | 216636.979  | 169490.1656 | 188330.9992 | 204409.0174 | 195933.4719 | 191303.3922 | 191885.3883 | 202653.7705 | 195265.6268 | 203233.8636 | 182892.0723 |
| P97372 | Psme2    | Proteasome activator complex subunit 2                                                                            | 458.769  | 53.56 | 27057  | 11 | 170408.5446 | 182831.5408 | 175827.8844 | 184516.0112 | 182170.9097 | 154440.8916 | 173991.7041 | 181554.4581 | 191524.1715 | 145543.0223 | 169498.1051 | 177011.8471 | 167007.7761 | 168746.7821 | 175222.173  |
| P97377 | Cdk2     | Cyclin-dependent kinase 2                                                                                         | 161.234  | 32.95 | 38978  | 8  | 32985.21082 | 35014.63886 | 31041.55934 | 33521.86034 | 28495.7655  | 27143.27196 | 24455.2299  | 30142.78387 | 38543.58753 | 33484.43571 | 33101.61964 | 21871.12447 | 30317.02381 | 37033.38525 | 44480.12293 |
| P97384 | Anxa11   | Annexin A11                                                                                                       | 133.63   | 14.71 | 54079  | 6  | 43233.57938 | 47030.41749 | 43935.28612 | 43473.53954 | 41871.2044  | 37239.38153 | 42960.60996 | 26564.07288 | 35804.28069 | 43573.30511 | 44213.17568 | 48150.71714 | 45476.45064 | 48140.4897  | 46221.84884 |
| P97429 | Anxa4    | Annexin A4                                                                                                        | 866.33   | 67.71 | 35916  | 20 | 652715.0314 | 657355.1882 | 547852.4701 | 560552.4272 | 583311.2254 | 836716.5593 | 780107.0592 | 847788.5913 | 871006.3065 | 797913.522  | 664489.2788 | 692383.6199 | 704343.7703 | 742459.2937 | 753817.1287 |
| P97449 | Anpep    | Aminopeptidase N                                                                                                  | 345.655  | 17.39 | 109651 | 11 | 77306.6161  | 59492.78701 | 37624.52391 | 44360.2477  | 49213.85782 | 35294.84693 | 58828.95177 | 54257.07901 | 61457.79139 | 53264.36714 | 74943.87315 | 50300.61055 | 57090.51824 | 66642.65029 | 48787.44543 |
| P97452 | Bop1     | Ribosome biogenesis protein BOP1                                                                                  | 64.636   | 5.33  | 82546  | 2  | 4528.595544 | 4628.543446 | 8175.114387 | 7808.034603 | 6150.551243 | 4681.97128  | 7766.310378 | 5634.254984 | 6824.350247 | 5138.923115 | 5231.802483 | 5253.459878 | 5307.078088 | 5222.465062 | 5148.864848 |
| P97461 | Rps5     | 40S ribosomal protein S5                                                                                          | 431.295  | 53.43 | 22889  | 11 | 622368.8701 | 641347.0062 | 630737.9436 | 643881.7719 | 655962.0418 | 572926.2127 | 644267.6205 | 673597.9308 | 610511.5401 | 514964.46   | 624738.0286 | 646878.7119 | 606210.7179 | 479330.3273 | 554077.7031 |
| P97470 | Ppp4c    | Serine/threonine-protein phosphatase 4 catalytic subunit                                                          | 80.328   | 14.33 | 35080  | 3  | 21056.23897 | 29446.32252 | 12001.36368 | 20684.53924 | 96902.2431  | 21329.06062 | 31287.39673 | 23771.12848 | 9928.910676 | 0.013320187 | 17317.13686 | 28065.19128 | 0.00981159  | 26089.01023 | 18085.08113 |
| P97576 | Grpel1   | GrpE protein homolog 1, mitochondrial                                                                             | 38.348   | 9.68  | 24297  | 2  | 15317.13818 | 6526.93477  | 11470.38338 | 13722.05403 | 7506.468773 | 14338.25599 | 16482.92845 | 16483.98186 | 9319.238919 | 14228.63198 | 13521.54358 | 14541.13363 | 15116.40056 | 13437.33801 | 14354.93614 |
| P97760 | Poli2c   | DNA-directed RNA polymerase II subunit RPB3                                                                       | 40.825   | 17.82 | 31443  | 2  | 2139.691291 | 6276.411789 | 4184.852256 | 4761.048041 | 4426.196978 | 2079.868072 | 3692.130469 | 3340.850592 | 3267.015161 | 3278.800638 | 4506.769672 | 4224.204832 | 3474.202203 | 3862.817234 | 3017.654622 |
| P97789 | Xmn1     | 5'-3' exonuclease 1                                                                                               | 25.722   | 1.16  | 194307 | 2  | 11320.79682 | 13880.74029 | 5009.453633 | 8206.689272 | 10995.8748  | 12789.27751 | 4554.853895 | 10585.51111 | 15839.60891 | 8801.832988 | 14389.17707 | 3900.939495 | 7888.909058 | 14582.76433 | 15016.801   |
| P97797 | Sirpa    | Tyrosine-protein phosphatase non-receptor type substrate 1                                                        | 278.579  | 21.64 | 56425  | 7  | 139491.2782 | 151064.2524 | 142133.6382 | 151812.1307 | 148772.8058 | 144090.7499 | 114048.1482 | 129607.3229 | 127928.0133 | 148408.8205 | 130824.1901 | 130210.9864 | 152640.802  | 140299.7769 | 132123.161  |
| P97807 | Fh       | Fumarate hydratase, mitochondrial                                                                                 | 1056.408 | 54.83 | 54357  | 21 | 427968.3912 | 427167.6263 | 431302.155  | 420333.1126 | 404983.3533 | 437200.413  | 409594.3292 | 434219.5885 | 470556.0497 | 445963.0413 | 426946.3823 | 432193.6735 | 453917.57   | 448997.7185 | 419719.5517 |
| P97808 | Fxyd5    | FXD domain-containing ion transport regulator 5                                                                   | 240.414  | 32.02 | 19454  | 3  | 28947.13109 | 18792.93766 | 17953.18475 | 11283.26154 | 21352.70571 | 19382.14149 | 25804.8502  | 20462.49329 | 17979.1946  | 20800.96372 | 24006.01187 | 25695.49872 | 26052.70803 | 22823.57068 | 18958.69347 |
| P97814 | Pstpip1  | Proline-serine-threonine phosphatase-interacting protein 1                                                        | 160.97   | 14.46 | 47590  | 5  | 25494.46205 | 24847.55703 | 9593.192244 | 16342.88032 | 25094.15583 | 24558.33189 | 22120.22915 | 24208.7328  | 25046.48061 | 18848.02452 | 22292.16848 | 22314.37506 | 21556.84609 | 20644.45887 | 24805.97405 |
| P97821 | Ctsc     | Dipeptidyl peptidase 1                                                                                            | 238.605  | 18.18 | 52376  | 7  | 103944.0904 | 89325.583   | 87395.66599 | 88710.69148 | 89076.33451 | 68165.24046 | 61361.40153 | 55303.68352 | 56754.07929 | 52971.01    | 69747.92101 | 73140.43898 | 75319.83956 | 71641.75368 | 75995.77995 |
| P97822 | Anp32e   | Acidic leucine-rich nuclear phosphoprotein 32 family member E                                                     | 298.797  | 23.85 | 29622  | 6  | 164385.4687 | 165934.4422 | 185721.5841 | 162364.2008 | 168140.1597 | 153657.9525 | 184719.5274 | 170475.0456 | 169915.209  | 167385.0918 | 141553.8509 | 156644.1975 | 168111.0502 | 159344.8354 | 170879.4593 |
| P97834 | Gps1     | COP9 signalosome complex subunit 1                                                                                | 189.463  | 17.62 | 53428  | 6  | 59382.04016 | 59341.44038 | 60292.95279 | 63236.24989 | 64113.39092 | 64470.72832 | 50946.68305 | 69836.86272 | 61811.00087 | 66976.55716 | 43631.78556 | 66593.96489 | 66677.20714 | 50414.68263 | 61896.64119 |
| P97855 | G3bp1    | Ras GTPase-activating protein-binding protein 1                                                                   | 387.894  | 28.17 | 51829  | 9  | 85631.18211 | 90148.61583 | 101618.2706 | 99810.02883 | 107825.7741 | 99976.28602 | 104646.7486 | 111028.8805 | 98329.74505 | 92508.76469 | 102342.5236 | 100141.0721 | 107238.4141 | 96049.77189 | 94549.66993 |
| P97874 | Gak      | Cyclin-G-associated kinase                                                                                        | 63.416   | 2.91  | 143703 | 2  | 3468.025544 | 3437.266123 | 2730.450936 | 3149.463878 | 2857.193332 | 3500.985159 | 2715.283804 | 1745.389234 | 2554.09322  | 4064.884409 | 4502.194236 | 3609.037752 | 3711.922954 | 4248.156832 | 3758.388772 |
| P97930 | Dtymk    | Thymidylate kinase                                                                                                | 71.615   | 17.45 | 23915  | 2  | 13137.73105 | 4714.56498  | 12068.88053 | 3264.430862 | 11864.47502 | 368.8433053 | 10156.00326 | 1929.561938 | 10497.42799 | 11567.82808 | 2650.170948 | 13007.27311 | 10088.69033 | 1150.459553 | 8711.570578 |
| P98078 | Dab2     | Disabled homolog 2                                                                                                | 586.553  | 34.6  | 82312  | 19 | 478910.4334 | 441583.1939 | 437676.5005 | 436588.5269 | 447204.0713 | 431845.4339 | 425123.6467 | 437791.3268 | 423535.7246 | 411113.2231 | 463573.2395 | 454204.9982 | 437860.3924 | 442806.6152 | 449715.2786 |
| P99026 | Psmb4    | Proteasome subunit beta type-4                                                                                    | 360.035  | 40.91 | 29116  | 9  | 246471.5939 | 256824.4848 | 245045.115  | 243080.9915 | 247719.1545 | 260045.6786 | 237123.9077 | 224705.8065 | 217981.8709 | 209199.2231 | 222435.3953 | 243682.6122 | 273336.9209 | 235148.2532 | 257978.4046 |
| P99027 | Rplp2    | 60S acidic ribosomal protein P2                                                                                   | 231.612  | 76.52 | 11651  | 5  | 54188.72176 | 23269.9804  | 49295.49404 | 39471.5588  | 9153.800236 | 42120.43945 | 18757.82764 | 17058.34252 | 38719.91133 | 11873.02519 | 60591.1705  | 20599.33489 | 8042.303501 | 16022.68353 | 8587.208644 |
| P99029 | Prdx5    | Peroxiredoxin-5, mitochondrial                                                                                    | 406.2    | 56.67 | 21897  | 11 | 40054.5862  | 344328.0812 | 320985.0963 | 318195.3384 | 313849.8449 | 292274.5842 | 265628.1266 | 228139.0006 | 263564.1038 | 248015.3134 | 351938.5804 | 276790.3521 | 274332.444  | 276841.8408 | 275984.5808 |
| Q00422 | Gabpa    | Ga-binding protein alpha chain                                                                                    | 52.183   | 4.41  | 51344  | 2  | 11075.07207 | 13166.44177 | 13810.37584 | 14408.85461 | 14306.97434 | 14143.18095 | 12990.46972 | 11921.19664 | 14176.28388 | 13698.64592 | 11452.99686 | 13155.3588  | 13328.79996 | 14318.72678 | 12722.71337 |
| Q00519 | Xdh      | Xanthine dehydrogenase/oxidase                                                                                    | 800.625  | 23.52 | 146562 | 19 | 216555.8488 | 201641.2047 | 196695.6485 | 218043.4384 | 197116.165  | 166252.6902 | 195577.7259 | 175559.8139 | 196627.8075 | 185048.7119 | 207743.2262 | 210467.5631 | 209729.7945 | 209852.488  | 221556.4013 |
| Q00612 | G6pdx    | Glucose-6-phosphate 1-dehydrogenase X                                                                             | 931.64   | 55.92 | 59263  | 28 | 621051.1812 | 668107.4309 | 620669.832  | 654996.2691 | 620686.2655 | 667881.0657 | 779595.7335 | 757070.821  | 770692.4451 | 680039.565  | 639238.8377 | 714884.7921 | 647798.752  | 658546.0056 | 654207.5246 |
| Q00PI9 | Hnrnpul2 | Heterogeneous nuclear ribonucleoprotein U-like protein 2                                                          | 410.491  | 21.48 | 84940  | 12 | 231631.3343 | 237469.9187 | 209097.8362 | 237113.6662 | 236223.3451 | 225547.3445 | 205226.91   | 226079.5285 | 225292.8999 | 226994.1404 | 202728.6002 | 223869.7136 | 232121.6094 | 231437.9449 | 210979.6177 |
| Q01205 | Dist     | Dihydropolypyllysine-residue succinyltransferase component of 2-oxoglutarate dehydrogenase complex, mitochondrial | 264.324  | 19.16 | 48925  | 8  | 252092.9614 | 271291.0231 | 239979.5623 | 265062.146  | 262402.4776 | 345887.3902 | 269014.4842 | 306548.3713 | 290603.2678 | 335251.3754 | 285471.4426 | 275763.56   | 304474.375  | 326534.792  | 296498.4751 |
| Q01320 | Top2a    | DNA topoisomerase 2-alpha                                                                                         | 1042.27  | 28.01 | 172790 | 33 | 260425.9429 | 274994.7615 | 314367.4681 | 333114.7798 | 318084.9403 | 304681.6277 | 273373.0016 | 277584.9525 | 300146.4126 | 302401.823  | 276036.467  | 290840.7597 | 297485.2654 | 318697.9829 | 280899.0029 |
| Q01405 | Sec23a   | Protein transport protein Sec23A                                                                                  | 135.088  | 7.32  | 86162  | 4  | 13316.3361  | 13959.47166 | 9692.234468 | 21665.7946  | 9749.833759 | 7824.093252 | 8846.286313 | 7735.939876 | 5698.16578  | 8853.2248   | 14854.10128 | 10118.42757 | 11768.82335 | 16099.93828 | 9688.339004 |
| Q01730 | Rsu1     | Ras suppressor protein 1                                                                                          | 225.544  | 37.18 | 31550  | 7  | 85237.88924 | 79958.21529 | 75494.19448 | 74091.82389 | 77025.63795 | 61550.90396 | 65927.16339 | 68686.57919 | 71508.33574 | 60198.40689 | 77676.17214 | 70354.49296 | 70075.04422 | 68230.87563 | 73658.29383 |
| Q01768 | Nme2     | Nucleoside diphosphate kinase B                                                                                   | 450.316  | 79.61 | 17363  | 13 | 473147.0958 | 506391.2815 | 511481.8668 | 460087.0955 | 504037.2739 | 494635.4414 | 524920.0629 | 530553.5971 | 501363.7562 | 458873.2595 | 463022.4137 | 518483.9486 | 463521.1544 | 505834.0264 | 481886.9416 |
| Q02053 | Uba1     | Ubiquitin-like modifier-activating enzyme 1                                                                       | 1435.103 | 44.33 | 117809 | 31 | 463493.6229 | 491570.9129 | 474039.1915 | 482139.4178 | 452457.9173 | 450857.1231 | 480763.5001 | 480625.8024 | 466577.3287 | 430682.1228 | 467438.4826 | 485597.0766 | 496652.1472 | 479926.1524 | 474529.1809 |
| Q02105 | C1qc     | Complement C1q subcomponent subunit C                                                                             | 81.145   | 16.26 | 25992  | 3  | 13522.68858 | 12584.26054 | 13310.99819 | 12836.53468 | 11855.58095 | 12098.5671  | 10953.2339  | 9272.74502  | 12740.33799 | 14182.90378 | 13566.41444 | 11099.84439 | 11170.95656 | 14014.73147 | 11968.34338 |
| Q02356 | Ampd2    | AMP deaminase 2                                                                                                   | 29.007   | 2.55  | 94787  | 2  |             |             |             |             |             |             |             |             |             |             |             |             |             |             |             |

|        |          |                                                                              |          |       |        |    |             |             |             |             |             |             |             |             |             |             |             |             |             |             |             |
|--------|----------|------------------------------------------------------------------------------|----------|-------|--------|----|-------------|-------------|-------------|-------------|-------------|-------------|-------------|-------------|-------------|-------------|-------------|-------------|-------------|-------------|-------------|
| Q05144 | Rac2     | Ras-related C3 botulinum toxin substrate 2                                   | 414.649  | 58.33 | 21441  | 9  | 829491.6727 | 788134.6445 | 777909.2799 | 800841.9824 | 834912.3332 | 859531.482  | 799008.3251 | 832625.631  | 778551.5766 | 660793.3335 | 587421.2391 | 668578.9414 | 623321.464  | 681945.4532 | 811889.6676 |
| Q05816 | Fabp5    | Fatty acid-binding protein 5                                                 | 300.599  | 63.7  | 15137  | 8  | 145671.2797 | 145778.0482 | 136373.3291 | 150871.4965 | 134352.4942 | 108265.7528 | 161616.4956 | 170531.1187 | 142420.5497 | 109814.9376 | 136215.4691 | 203057.9553 | 165926.7744 | 166553.8759 | 156572.7704 |
| Q05921 | Rnasel   | 2-5A-dependent ribonuclease                                                  | 45.813   | 4.63  | 83275  | 2  | 5290.115139 | 4826.47217  | 3500.774174 | 5261.910395 | 4854.601796 | 9736.99278  | 2863.337933 | 2496.704954 | 3993.004682 | 4000.572882 | 2761.206768 | 3680.903459 | 2716.802043 | 5129.369195 | 3374.082378 |
| Q06138 | Cab39    | Calcium-binding protein 39                                                   | 276.569  | 24.63 | 39843  | 9  | 75388.41568 | 78650.80218 | 75264.13056 | 90058.77952 | 84552.868   | 93480.856   | 99137.11258 | 100744.2955 | 103868.0808 | 95001.65765 | 78308.54841 | 96964.60855 | 102121.248  | 101746.0723 | 104487.8789 |
| Q06185 | Atp5me   | ATP synthase subunit e, mitochondrial                                        | 67.927   | 32.39 | 8236   | 2  | 79333.19027 | 74358.85902 | 71872.7133  | 65312.15212 | 75493.66846 | 80042.55543 | 27137.94207 | 74073.38272 | 75891.86225 | 73199.5953  | 70741.75859 | 63455.97161 | 74290.36827 | 68065.82467 | 69231.19973 |
| Q07076 | Anxa7    | Annexin A7                                                                   | 327.888  | 20.52 | 49925  | 9  | 157729.0472 | 149810.782  | 143212.9949 | 158347.4592 | 138166.7004 | 134439.7254 | 147287.2892 | 145266.7345 | 149860.8468 | 129553.5365 | 139327.5833 | 147996.9561 | 140173.3517 | 155261.2854 | 140680.6372 |
| Q07797 | Lgals3bp | Galectin-3-binding protein                                                   | 454.935  | 26.52 | 64491  | 9  | 107647.1177 | 104726.0267 | 113014.2329 | 111162.507  | 108731.2989 | 119262.2976 | 126940.1774 | 121436.6028 | 128592.0075 | 103369.5522 | 107990.3627 | 106219.83   | 95656.14591 | 101868.078  | 99366.5488  |
| Q07803 | Gfm1     | Elongation factor G, mitochondrial                                           | 48.631   | 3.73  | 83457  | 2  | 13003.75078 | 9310.466204 | 13308.9488  | 14729.99615 | 6006.32804  | 15251.42809 | 9964.465339 | 16458.62537 | 14777.70275 | 18534.21423 | 7657.363345 | 12004.08288 | 13763.01189 | 13888.44087 | 14929.37851 |
| Q07813 | Bax      | Apoptosis regulator BAX                                                      | 202.847  | 29.17 | 21395  | 4  | 52246.19195 | 57867.74109 | 50881.58661 | 56277.78506 | 45596.94526 | 42930.53164 | 50870.86959 | 58084.7877  | 51259.49743 | 49037.52551 | 49870.90386 | 55291.2322  | 53372.62709 | 52201.31616 | 49033.49497 |
| Q07984 | Ssr4     | Translocon-associated protein subunit delta                                  | 153.742  | 30.64 | 18980  | 4  | 51196.26889 | 66571.31776 | 43777.06012 | 60292.33021 | 54071.38901 | 61495.3692  | 73639.71777 | 65925.17939 | 67782.2663  | 75390.88593 | 73216.725   | 70703.61928 | 71921.507   | 66172.28723 | 68069.25828 |
| Q08509 | Eps8     | Epidermal growth factor receptor kinase substrate 8                          | 147.989  | 9.01  | 91737  | 4  | 17319.69762 | 10858.19209 | 14205.40236 | 13198.78181 | 8465.330645 | 11690.18957 | 11871.78749 | 10360.29693 | 14356.68734 | 10579.01066 | 14487.69242 | 11802.99357 | 9933.443993 | 9075.705388 | 15712.55737 |
| Q08877 | Dnm3     | Dynamin-3                                                                    | 64.986   | 4.72  | 97914  | 4  | 103394.4643 | 95988.19224 | 86103.44889 | 89193.33915 | 84859.81241 | 84521.32255 | 88010.82253 | 93049.92619 | 96226.69198 | 91126.28913 | 93860.50169 | 93790.30965 | 96587.68771 | 90200.32607 | 96081.87194 |
| Q09014 | Ncf1     | Neutrophil cytosol factor 1                                                  | 176.654  | 15.9  | 44667  | 6  | 99899.20958 | 101272.5966 | 101000.6775 | 100527.365  | 107410.7866 | 95363.25113 | 94758.12757 | 89169.97887 | 97667.26732 | 96239.21624 | 102160.8917 | 103423.1421 | 92768.33029 | 96587.46881 | 96517.27881 |
| Q0VBL3 | Rbm15    | RNA-binding protein 15                                                       | 80.043   | 5.61  | 105722 | 3  | 11492.20074 | 7997.189381 | 7928.972712 | 5374.610648 | 12092.39265 | 7467.770023 | 12708.17743 | 10776.91118 | 6576.377277 | 4346.792445 | 11943.97739 | 5464.622433 | 12415.34582 | 6363.531444 | 9534.793744 |
| Q0VGY8 | Tanc1    | Protein TANC1                                                                | 231.505  | 6.68  | 200805 | 8  | 14813.69366 | 17542.28426 | 6913.583989 | 14499.96194 | 14299.44414 | 5833.170368 | 7652.753525 | 6674.049061 | 7972.864874 | 7624.164494 | 17251.85222 | 8318.287698 | 16674.43938 | 12775.88597 | 1623.08974  |
| Q11011 | Npepps   | Puromycin-sensitive aminopeptidase                                           | 550.395  | 29.02 | 103325 | 16 | 127072.8847 | 141954.627  | 126712.2705 | 115722.5173 | 127971.1767 | 119190.6455 | 142479.843  | 140238.2476 | 128353.6869 | 131939.5283 | 128693.6347 | 134333.0174 | 133132.0542 | 135559.2571 | 136875.8053 |
| Q11136 | Pepd     | Xaa-Pro dipeptidase                                                          | 322.341  | 29.21 | 55029  | 11 | 153772.5748 | 158783.1345 | 168085.8036 | 157432.3848 | 174854.2359 | 103578.7685 | 131110.8992 | 123907.3473 | 131628.5264 | 147636.1165 | 160823.0495 | 158705.9331 | 132172.1765 | 148768.1371 | 170126.858  |
| Q14C51 | Ptdc3    | Pentatricopeptide repeat domain-containing protein 3, mitochondrial          | 73.369   | 6.13  | 77796  | 4  | 15031.25247 | 15308.92802 | 14088.42562 | 15728.60667 | 16772.84951 | 27631.55841 | 18410.91115 | 18197.00143 | 19077.38566 | 20846.52376 | 16072.60398 | 16800.19185 | 14714.28603 | 17755.87337 | 18956.23676 |
| Q1AAU6 | Asap1    | Arf-GAP with SH3 domain, ANK repeat and PH domain-containing protein 1       | 376.54   | 17.92 | 127088 | 13 | 93709.17193 | 102406.2481 | 104670.6022 | 104516.1165 | 96529.92402 | 83132.32097 | 91156.10855 | 84036.35271 | 79796.27643 | 88693.94974 | 85437.18646 | 96213.19943 | 99079.99842 | 96435.74184 | 111818.7232 |
| Q1HFZ0 | Nsun2    | tRNA (cytosine(34)-C(5))-methyltransferase                                   | 234.526  | 14.93 | 85452  | 8  | 28204.4637  | 32671.44704 | 22502.23118 | 29052.6371  | 26115.25805 | 22718.49475 | 29612.35709 | 21558.38917 | 22948.22011 | 26687.27087 | 27494.83133 | 29142.99551 | 28022.72571 | 19695.18304 | 24674.1507  |
| Q27W01 | Rbm8a    | RNA-binding protein 8A                                                       | 50.009   | 15.52 | 19889  | 2  | 13980.6898  | 18892.54602 | 16616.28888 | 16275.6481  | 18151.95848 | 16094.38932 | 15876.90547 | 17239.26616 | 17944.7358  | 16664.22982 | 21047.69494 | 19159.5649  | 16542.30669 | 18660.23986 | 16478.52628 |
| Q2PQA9 | Kif5b    | Kinesin-1 heavy chain                                                        | 506.963  | 21.39 | 109531 | 16 | 118309.0077 | 95994.55979 | 105399.5564 | 94992.33804 | 101908.3779 | 90520.55284 | 94180.36716 | 88147.74272 | 90022.38031 | 99578.84684 | 104794.0588 | 98325.8181  | 91038.99532 | 102073.186  | 96787.57172 |
| Q2TBE6 | Plak2a   | Phosphatidylinositol 4-kinase type 2-alpha                                   | 55.402   | 3.34  | 54258  | 2  | 7868.933968 | 6907.76808  | 6767.286985 | 7138.024128 | 5931.832482 | 5277.648251 | 6404.583138 | 6165.239864 | 7386.294982 | 7575.102049 | 7954.559912 | 7355.324845 | 9110.815744 | 9090.808959 | 7742.218916 |
| Q32PX7 | Fubp1    | Far upstream element-binding protein 1                                       | 151.872  | 7.2   | 67197  | 4  | 78776.56351 | 79905.42207 | 87611.55062 | 82554.74407 | 83401.49998 | 78601.36325 | 86531.66056 | 82110.62014 | 80445.35973 | 84233.87164 | 86558.1414  | 83030.4948  | 74707.67973 | 82296.64652 | 83600.7868  |
| Q3B7Z2 | Osbp     | Oxysterol-binding protein 1                                                  | 104.934  | 9.19  | 88797  | 4  | 18911.88425 | 24536.28044 | 18414.16968 | 18842.5162  | 22957.76193 | 17801.94661 | 19579.93656 | 18538.46929 | 23024.47232 | 18793.87296 | 21993.7046  | 20162.9057  | 21703.53917 | 21956.1501  | 22662.80532 |
| Q3BQ02 | Elf4a3   | Eukaryotic initiation factor 4A-III                                          | 588.952  | 54.01 | 46841  | 19 | 323357.8689 | 344574.1587 | 355559.4664 | 366175.5079 | 376961.6617 | 398968.7374 | 380465.3902 | 395534.8571 | 403175.5318 | 355469.7141 | 338951.5283 | 376300.3847 | 365873.5403 | 377454.7599 | 326849.4192 |
| Q3KRD0 | Dars2    | Aspartate--tRNA ligase, mitochondrial                                        | 59.564   | 4.75  | 73953  | 3  | 12632.40373 | 14043.87294 | 14645.1136  | 12392.5604  | 14576.72858 | 15683.12201 | 12758.418   | 6812.241389 | 6368.806561 | 14210.33338 | 12734.90335 | 5639.480542 | 6411.160975 | 8237.85124  | 14608.56691 |
| Q3KRE0 | Atad3    | ATPase family AAA domain-containing protein 3                                | 71.891   | 4.74  | 66759  | 2  | 8408.488526 | 8932.377559 | 6579.733011 | 10027.90024 | 8882.255404 | 9455.348754 | 9805.491824 | 7914.469857 | 8158.412107 | 8639.47989  | 8868.266204 | 9112.51567  | 8997.092055 | 7897.415308 | 9000.92795  |
| Q3KRE8 | Tubb2b   | Tubulin beta-2B chain                                                        | 1629.306 | 64.27 | 49953  | 36 | 5058065.347 | 4871017.06  | 5064686.862 | 5155844.215 | 4715508.273 | 4223185.023 | 4362681.137 | 3821735.894 | 4372411.261 | 4499084.74  | 5242847.008 | 5076347.46  | 4732101.066 | 5084064.676 | 4264887.568 |
| Q3SWU3 | Hnmpd1   | Heterogeneous nuclear ribonucleoprotein D-like                               | 55.513   | 5.59  | 35294  | 2  | 85786.93131 | 73434.42933 | 86100.32964 | 93318.66665 | 64397.21572 | 57028.41567 | 68399.66131 | 58806.7746  | 72179.19934 | 79687.5653  | 80531.52505 | 90509.9333  | 83594.02224 | 91022.50752 | 80908.98997 |
| Q3T114 | Prrc1    | Protein PRRC1                                                                | 118.43   | 9.71  | 46295  | 2  | 8345.739027 | 8657.854306 | 6037.383559 | 7924.796509 | 6636.341972 | 6755.221271 | 7812.453538 | 8982.749231 | 8358.542471 | 7255.464184 | 7291.310538 | 4973.295308 | 8051.715907 | 7867.122538 | 8362.793627 |
| Q3T1J9 | Mob1a    | MOB kinase activator 1A                                                      | 118.443  | 33.8  | 25080  | 6  | 86582.79122 | 90892.01642 | 88954.95009 | 93022.64177 | 92340.15024 | 92013.18684 | 97459.85022 | 82818.84531 | 88293.28389 | 93580.36707 | 91563.48992 | 97031.52284 | 96547.09716 | 93883.9447  | 102933.9511 |
| Q3TBD2 | Arhgap45 | Rho GTPase-activating protein 45                                             | 339.323  | 15.77 | 122902 | 11 | 92283.99224 | 107491.4281 | 99886.32443 | 91942.59757 | 96745.45629 | 74396.31513 | 82787.22042 | 55741.60722 | 79135.36955 | 80866.83475 | 89165.87376 | 84251.33649 | 89771.82131 | 86510.21649 | 93582.45251 |
| Q3TBW2 | Mprl10   | 39S ribosomal protein L10, mitochondrial                                     | 110.241  | 23.28 | 29396  | 3  | 8456.726687 | 7529.065451 | 7364.631671 | 7766.932009 | 5238.74641  | 6461.145177 | 2697.636846 | 7383.189892 | 8433.732802 | 6650.853841 | 8288.291252 | 6447.39669  | 7413.77431  | 6319.601403 | 7777.560214 |
| Q3TC93 | Hs1bp3   | HCLS1-binding protein 3                                                      | 120.248  | 17.72 | 43691  | 4  | 24495.81168 | 17341.27336 | 27101.13692 | 21358.2233  | 20655.84007 | 19227.34715 | 21766.66455 | 21118.09784 | 18039.65533 | 18567.33155 | 22113.57414 | 23708.5187  | 20345.51575 | 20676.94376 | 21674.9888  |
| Q3TCH7 | Cul4a    | Cullin-4A                                                                    | 110.431  | 6.46  | 87753  | 4  | 29605.91042 | 31193.04771 | 23307.73308 | 29581.47045 | 26794.12891 | 22433.72006 | 29224.86198 | 32251.313   | 31210.89294 | 28287.63471 | 26505.27243 | 27526.75673 | 29165.13331 | 27713.89307 | 27532.64146 |
| Q3TCJ1 | Abraxas2 | BRIS complex subunit Abraxas 2                                               | 87.53    | 10.12 | 46943  | 3  | 12159.33494 | 13591.90517 | 13370.26637 | 13861.43761 | 10694.2567  | 11848.33438 | 12488.18473 | 13050.61071 | 11092.34073 | 12038.95476 | 12174.57977 | 14258.04739 | 12893.34197 | 12462.77238 | 12950.86601 |
| Q3TCN2 | Pldb2    | Putative phospholipase B-like 2                                              | 263.875  | 17    | 66289  | 8  | 74806.02538 | 65535.72056 | 51452.45269 | 68707.47811 | 50048.32934 | 34415.58527 | 39110.59036 | 32721.77592 | 29517.70231 | 42002.0259  | 49164.9994  | 49652.96025 | 46173.54034 | 52573.36638 | 47049.28629 |
| Q3TDN2 | Faf2     | FAS-associated factor 2                                                      | 70.767   | 10.11 | 52471  | 3  | 17654.20509 | 5017.585759 | 10383.6756  | 10181.32363 | 8874.899823 | 10888.27143 | 11075.15736 | 11491.22204 | 5593.469274 | 11547.87943 | 12054.672   | 3553.687458 | 13612.69097 | 13582.46918 | 12208.1568  |
| Q3TDQ1 | Stt3b    | Dolichyl-diphosphooligosaccharide--protein glycosyltransferase subunit STT3B | 15.104   | 2.19  | 93246  | 2  | 4022.714749 | 4186.425718 | 3758.300361 | 4           |             |             |             |             |             |             |             |             |             |             |             |

|        |          |                                                                          |         |       |        |    |             |             |             |             |             |             |             |             |             |             |             |             |             |             |             |
|--------|----------|--------------------------------------------------------------------------|---------|-------|--------|----|-------------|-------------|-------------|-------------|-------------|-------------|-------------|-------------|-------------|-------------|-------------|-------------|-------------|-------------|-------------|
| Q3TW96 | Uap11    | UDP-N-acetylhexosamine pyrophosphorylase-like protein 1                  | 543.298 | 39.64 | 56614  | 16 | 257413.2615 | 243185.8647 | 234943.1861 | 244195.3356 | 233672.0381 | 214732.4817 | 247052.5501 | 245407.1747 | 226803.855  | 207101.4402 | 227281.6259 | 256900.8662 | 240882.6334 | 237365.9162 | 253662.1099 |
| Q3TXS7 | Psmd1    | 26S proteasome non-ATPase regulatory subunit 1                           | 788.732 | 34.31 | 105730 | 24 | 379795.7941 | 429504.0498 | 400540.5011 | 408516.9893 | 404553.9254 | 409963.6174 | 420370.6203 | 436506.6164 | 443327.2973 | 395164.4305 | 402337.0156 | 402643.8575 | 394744.7723 | 409125.7813 | 385547.375  |
| Q3TYS2 | Cybc1    | Cytochrome b-245 chaperone 1                                             | 41.296  | 11.23 | 20921  | 2  | 31331.49325 | 33598.19462 | 34809.29829 | 30156.77836 | 31400.05563 | 29157.0887  | 33235.12773 | 33496.3397  | 31823.12794 | 31951.76838 | 29797.22012 | 27586.24868 | 32326.21672 | 34178.87094 | 34713.80626 |
| Q3U0V1 | Khrrp    | Far upstream element-binding protein 2                                   | 709.8   | 30.48 | 76775  | 19 | 438797.6707 | 409136.4073 | 425427.1182 | 400814.2894 | 425279.8723 | 363228.9217 | 400603.6275 | 367577.6439 | 349923.3207 | 366679.9568 | 438692.7084 | 426058.2088 | 418383.9935 | 412494.9994 | 423917.924  |
| Q3U186 | Rars2    | Probable arginine--tRNA ligase, mitochondrial                            | 75.549  | 4.84  | 65336  | 2  | 1616.415499 | 2784.702663 | 0.009509917 | 2292.547916 | 2100.316278 | 2298.565993 | 1249.974599 | 1316.937762 | 2923.97838  | 2573.885957 | 2626.293918 | 2786.479845 | 2090.001164 | 2465.068396 | 2605.704047 |
| Q3U1J4 | Ddb1     | DNA damage-binding protein 1                                             | 492.801 | 19.56 | 126853 | 16 | 231301.3924 | 250783.4457 | 242277.3486 | 223165.0962 | 238724.8254 | 216614.1353 | 238512.6665 | 240186.6534 | 210626.7858 | 213005.733  | 223128.1439 | 205891.2159 | 205434.1234 | 211583.9438 | 223816.6505 |
| Q3U1Y4 | Dennd4b  | DENN domain-containing protein 4B                                        | 42.609  | 2.54  | 164740 | 2  | 6035.975863 | 7837.621011 | 7026.524339 | 5502.927594 | 0.008265859 | 8836.979299 | 7734.244478 | 7126.319181 | 4666.444277 | 5459.773517 | 4943.593245 | 8243.773315 | 5697.559754 | 7734.008624 | 5387.576929 |
| Q3U4I7 | Pyrox2   | Pyridine nucleotide-disulfide oxidoreductase domain-containing protein 2 | 48.518  | 3.79  | 62940  | 2  | 7965.897782 | 7438.244166 | 7246.951198 | 7758.770873 | 7768.873136 | 6675.156048 | 4129.194646 | 6336.821458 | 6780.217972 | 7001.148516 | 8960.21165  | 5862.982344 | 7070.377828 | 8274.266899 | 7969.387887 |
| Q3U7R1 | Esy1     | Extended synaptotagmin-1                                                 | 422.369 | 14.65 | 121554 | 11 | 81685.78232 | 89021.98226 | 76220.74742 | 85172.36965 | 81828.23425 | 96515.0795  | 92956.40493 | 94107.93486 | 103491.2846 | 87526.86826 | 90390.08841 | 83184.54803 | 89233.88125 | 79531.89177 | 91323.29114 |
| Q3U821 | Wdr75    | WD repeat-containing protein 75                                          | 86.753  | 3.73  | 94037  | 2  | 4389.523175 | 3247.049399 | 2863.31309  | 4428.651432 | 2700.416852 | 2345.26354  | 3944.272788 | 1107.436061 | 3534.327592 | 3005.127208 | 3628.467108 | 4046.373157 | 3062.73752  | 2933.026141 | 3424.947155 |
| Q3U9G9 | Lbr      | Lamin-B receptor                                                         | 489.882 | 25.56 | 71440  | 14 | 191247.5302 | 184460.7726 | 196798.1654 | 196845.6612 | 199557.4992 | 248983.4365 | 268677.4943 | 294598.5479 | 270277.1985 | 242365.2897 | 187216.4526 | 216508.2174 | 207695.7341 | 194677.7107 | 184961.2548 |
| Q3UCV8 | Otulin   | Ubiquitin thioesterase otulin                                            | 87.393  | 6.53  | 40320  | 3  | 19743.80943 | 18868.84352 | 13978.49216 | 17940.50491 | 16884.47167 | 14895.37748 | 14930.41037 | 18955.03003 | 17038.54673 | 14272.87165 | 17194.97208 | 17450.44269 | 15814.6436  | 17469.55313 | 16758.12046 |
| Q3UDE2 | Ttl12    | Tubulin--tyrosine ligase-like protein 12                                 | 302.869 | 20.81 | 74043  | 10 | 81431.10321 | 87278.96644 | 81426.45246 | 80247.7713  | 85211.50817 | 81332.37377 | 89005.02905 | 96070.12606 | 85927.82195 | 88703.78004 | 78676.86527 | 82775.41802 | 84112.27043 | 97115.24604 | 89526.38048 |
| Q3UEB3 | Puf60    | Poly(U)-binding-splicing factor PUF60                                    | 441.811 | 26.24 | 60249  | 11 | 94320.25703 | 97412.5808  | 88727.14953 | 90080.43249 | 82946.49751 | 87668.36035 | 98509.85949 | 100545.2276 | 88793.98924 | 89961.57199 | 95206.20121 | 96350.17085 | 97992.72705 | 94085.89819 | 88656.6753  |
| Q3UFY7 | Nt5c3b   | 7-methylguanosine phosphate-specific 5'-nucleotidase                     | 19.393  | 6.67  | 34425  | 2  | 9155.407362 | 10028.27463 | 8906.717663 | 10578.58603 | 9694.345048 | 6937.114162 | 8745.46485  | 8223.724291 | 6190.731091 | 8556.039708 | 8519.145078 | 8171.109989 | 9473.705992 | 8983.759601 | 10695.27049 |
| Q3UGP9 | Lrrc58   | Leucine-rich repeat-containing protein 58                                | 61.816  | 12.84 | 40139  | 2  | 2417.496815 | 2770.421041 | 2570.721459 | 2734.999924 | 2411.743094 | 1434.352231 | 2319.872697 | 1710.772137 | 2345.47717  | 2031.327238 | 2555.167581 | 2539.262414 | 2274.623698 | 1664.506694 | 1994.513283 |
| Q3UGR5 | Hdh2     | Haloacid dehalogenase-like hydrolase domain-containing protein 2         | 59.041  | 21.62 | 28730  | 3  | 13541.11352 | 13768.08109 | 8660.844073 | 14270.29687 | 10106.18424 | 12662.78314 | 8465.377563 | 8925.014956 | 8880.849836 | 19056.83843 | 13296.46507 | 13166.80139 | 13795.07616 | 12869.03091 | 13353.13954 |
| Q3UH60 | Dip2b    | Disco-interacting protein 2 homolog B                                    | 311.056 | 7.43  | 171126 | 8  | 34899.37211 | 37130.46287 | 27158.06091 | 27595.94485 | 32555.26107 | 33960.01337 | 37733.30947 | 34211.59136 | 34269.5667  | 32368.42716 | 32820.95645 | 33433.59611 | 35588.39139 | 37436.02674 | 28474.92135 |
| Q3UH66 | Wnk2     | Serine/threonine-protein kinase WNK2                                     | 43.677  | 1.44  | 227527 | 3  | 24520.95342 | 24735.88284 | 21338.78313 | 22948.04787 | 25136.68987 | 21107.31777 | 22961.85792 | 23792.40933 | 25202.02099 | 23435.50355 | 21850.00357 | 22218.95109 | 25662.56732 | 25954.07299 | 27533.12063 |
| Q3UJH0 | Aak1     | AP2-associated protein kinase 1                                          | 165.006 | 7.92  | 103346 | 5  | 5565.452639 | 14104.42804 | 8569.982184 | 13249.4533  | 13041.18513 | 9428.351981 | 11070.62004 | 14967.8292  | 10972.67442 | 8906.347304 | 10781.06339 | 10028.21487 | 15762.77095 | 11014.99733 | 9776.22963  |
| Q3UH06 | Dop1b    | Protein dopey-2                                                          | 36.014  | 0.96  | 257483 | 2  | 1259.065548 | 1155.280451 | 1096.222593 | 1048.267372 | 618.1206834 | 776.9173158 | 791.402159  | 1193.153989 | 808.6372283 | 756.8257138 | 930.9113511 | 893.8811353 | 676.7477605 | 918.9215033 | 861.40156   |
| Q3UIA2 | Arhgap17 | Rho GTPase-activating protein 17                                         | 328.307 | 10.05 | 92202  | 5  | 28417.19879 | 30669.02713 | 26476.09998 | 30485.09241 | 24234.21513 | 23000.9249  | 27044.23259 | 25587.532   | 19043.37848 | 23183.26583 | 24259.30314 | 27142.66298 | 27355.93495 | 25143.35972 | 29281.35546 |
| Q3UJB9 | Edc4     | Enhancer of mRNA-decapping protein 4                                     | 224.499 | 7.89  | 152484 | 7  | 36933.04971 | 43652.26748 | 43546.29246 | 40812.20449 | 36849.6703  | 39749.42709 | 43541.93599 | 52246.15363 | 43058.70816 | 46951.92057 | 36421.99532 | 42327.99613 | 38449.21806 | 39699.77042 | 37995.68839 |
| Q3UJD6 | Usp19    | Ubiquitin carboxyl-terminal hydrolase 19                                 | 105.179 | 4.19  | 150549 | 3  | 2796.665598 | 4158.834736 | 1158.381506 | 3390.131109 | 2644.76799  | 1352.557717 | 2678.635261 | 2830.126444 | 3264.781245 | 1709.964209 | 2444.299729 | 2842.744007 | 2251.202549 | 2531.94675  | 1926.966423 |
| Q3UKJ7 | Smu1     | WD40 repeat-containing protein SMU1                                      | 144.893 | 16.57 | 57544  | 5  | 18228.20586 | 36916.15535 | 32265.46194 | 29143.46083 | 34644.34533 | 28736.07063 | 31072.44067 | 36897.12303 | 36072.77053 | 35273.79635 | 33364.03152 | 21107.98633 | 20818.31789 | 36901.64189 | 32094.33808 |
| Q3ULJ0 | Gpd1l    | Glycerol-3-phosphate dehydrogenase 1-like protein                        | 60.258  | 15.38 | 38226  | 3  | 25613.97837 | 27904.21173 | 24691.50691 | 26163.94809 | 20408.5731  | 22745.33522 | 24849.64634 | 25016.18295 | 26272.83261 | 23732.02423 | 24384.12123 | 26037.76425 | 26043.2423  | 27509.05929 | 25588.13371 |
| Q3UM45 | Ppp1r7   | Protein phosphatase 1 regulatory subunit 7                               | 447.807 | 57.34 | 41292  | 14 | 121238.8252 | 125984.3856 | 114240.3276 | 129939.2687 | 128826.9659 | 112986.3968 | 130122.5027 | 124540.8569 | 119232.651  | 113831.0672 | 121188.9873 | 129609.8899 | 133261.7831 | 129019.6404 | 130032.0352 |
| Q3UMB9 | Washc4   | WASH complex subunit 4                                                   | 241.169 | 8.95  | 136370 | 6  | 21967.68402 | 22315.09685 | 13712.12532 | 16420.82896 | 14014.0292  | 11971.85456 | 14007.93922 | 14334.07922 | 12723.80791 | 12969.16335 | 19551.51529 | 10693.367   | 10403.36029 | 14123.55857 | 14999.96921 |
| Q3UND0 | Skap2    | Src kinase-associated phosphoprotein 2                                   | 185.729 | 23.46 | 40712  | 4  | 19623.77898 | 15305.91534 | 19497.01168 | 16172.48465 | 14081.72349 | 12922.45938 | 14380.52973 | 17573.85279 | 18684.84173 | 11401.04355 | 11229.54172 | 19264.00074 | 17725.89108 | 10345.93293 | 14303.63266 |
| Q3UPL0 | Sec31a   | Protein transport protein Sec31A                                         | 396.156 | 14.47 | 133569 | 11 | 58404.15923 | 71331.94164 | 63571.08316 | 73461.20504 | 70650.90835 | 66713.77591 | 70857.2855  | 60291.33753 | 68155.1415  | 61752.9726  | 67899.69032 | 62666.46808 | 62033.18528 | 63735.79041 | 60258.05324 |
| Q3UQ44 | Iqgap2   | Ras GTPase-activating-like protein IQGAP2                                | 68.925  | 2.16  | 180528 | 4  | 135983.9637 | 148751.5447 | 127043.3963 | 135885.3354 | 134403.9161 | 131481.4869 | 126738.9467 | 124796.1437 | 139765.2254 | 129653.3846 | 166915.4132 | 158133.6293 | 157542.4664 | 159579.5607 | 150213.93   |
| Q3UQ84 | Tars2    | Threonine--tRNA ligase, mitochondrial                                    | 44.498  | 4.98  | 81700  | 3  | 694.3082137 | 486.7147304 | 3295.521911 | 3742.656043 | 2678.378791 | 3501.120525 | 2777.837284 | 2432.156155 | 3228.027751 | 3402.464654 | 2630.710438 | 2951.044176 | 3428.657145 | 4495.912646 | 3271.821544 |
| Q3URQ0 | Tex10    | Testis-expressed protein 10                                              | 104.337 | 5.71  | 105209 | 4  | 9075.489543 | 10935.53292 | 10659.98744 | 10134.23345 | 9915.97649  | 11284.43647 | 13472.75173 | 11713.7422  | 11298.48482 | 12273.82296 | 10373.31905 | 10065.03109 | 11818.18056 | 10223.0218  | 12073.55815 |
| Q3USZ8 |          | Deleted in autism protein 1 homolog                                      | 77.072  | 5.35  | 49463  | 2  | 9474.311534 | 8992.241641 | 10158.42845 | 9588.124038 | 8843.666242 | 15965.58487 | 14540.62616 | 13720.49737 | 12651.42238 | 14435.08655 | 9307.173318 | 12852.8293  | 12500.58524 | 11317.81533 | 12544.36527 |
| Q3UVK0 | Ermp1    | Endoplasmic reticulum metalloproteinase 1                                | 73.349  | 6.57  | 100148 | 3  | 4837.704207 | 1133.407147 | 4460.627975 | 4813.546006 | 3502.581762 | 3373.234847 | 6347.240714 | 4414.86987  | 6167.229266 | 3091.132325 | 3461.096002 | 1792.780526 | 5929.166019 | 5373.815007 | 3773.755239 |
| Q3UVL4 | Vps51    | Vacuolar protein sorting-associated protein 51 homolog                   | 179.751 | 7.67  | 86187  | 4  | 10200.63319 | 9200.805504 | 8030.836434 | 10137.42958 | 9320.024592 | 7559.184941 | 9698.540208 | 10572.42926 | 9419.717538 | 10158.41157 | 9131.610472 | 8989.934942 | 9349.649472 | 8406.551157 | 9029.056481 |
| Q3UW53 | Fam129a  | Protein Nilan                                                            | 737.731 | 34.99 | 102649 | 25 | 465194.4013 | 463128.0927 | 453848.6477 | 461995.6389 | 483738.9033 | 386317.7742 | 408348.2941 | 368369.4996 | 412363.57   | 392319.5849 | 442957.923  | 426941.8977 | 437108.7854 | 441667.2019 | 432340.3626 |
| Q3UVY9 | Ncbp1    | Nuclear cap-binding protein subunit 1                                    | 257.185 | 10.38 | 91927  | 7  | 21032.63145 | 21798.52714 | 22245.80101 | 24963.58361 | 19146.26279 | 19724.42836 | 21838.8136  | 26609.52988 | 26803.32954 | 23060.12403 | 21344.90157 | 20132.95141 | 22093.93989 | 21311.50434 | 23268.06086 |
| Q3UZ39 | Lrrfp1   | Leucine-rich repeat flightless-interacting protein 1                     | 164.582 | 14.81 | 79249  | 5  | 18336.75442 | 19075.68693 | 17941.33658 | 12466.43479 | 16034.76204 | 15365.1166  | 15387.9769  | 14728.81198 | 12290.00224 | 11259.85703 | 12844.392   | 14010.3354  | 14890.39058 | 13095.16391 | 12041.0135  |
| Q3UZA1 | Rcsd1    | CapZ-interacting protein                                                 | 48.015  | 7.2   |        |    |             |             |             |             |             |             |             |             |             |             |             |             |             |             |             |

|        |          |                                                                            |         |       |        |    |             |             |             |             |             |             |             |             |             |             |             |             |             |             |             |
|--------|----------|----------------------------------------------------------------------------|---------|-------|--------|----|-------------|-------------|-------------|-------------|-------------|-------------|-------------|-------------|-------------|-------------|-------------|-------------|-------------|-------------|-------------|
| Q49C8  | Rer1     | Protein RER1                                                               | 53.922  | 15.31 | 22988  | 2  | 20058.52229 | 22113.3127  | 19775.96846 | 22132.81471 | 21884.36782 | 23504.95977 | 24966.33633 | 20096.72138 | 20600.23528 | 21620.67803 | 20620.9671  | 18683.59532 | 22228.80265 | 19406.89116 | 25401.38979 |
| Q4FY0  | Efh2     | EF-hand domain-containing protein D2                                       | 624.41  | 58.16 | 26759  | 16 | 979807.8787 | 955941.503  | 908318.1694 | 949774.7626 | 925989.9313 | 793042.4332 | 837175.2852 | 765157.8645 | 806591.4143 | 881720.8347 | 1053726.134 | 967617.7256 | 975420.032  | 997686.5805 | 980495.1709 |
| Q4G009 | Mcts1    | Malignant T-cell-amplified sequence 1                                      | 100.927 | 20.33 | 20550  | 2  | 4323.489888 | 3933.720035 | 3915.759631 | 3970.723599 | 2972.871961 | 1809.77574  | 2688.13698  | 2386.314019 | 2918.989089 | 2325.486516 | 4490.884026 | 3595.547113 | 3535.841409 | 3445.370621 | 2915.982    |
| Q4KLL4 | Tm9sf4   | Transmembrane 9 superfamily member 4                                       | 85.689  | 4.35  | 74675  | 2  | 25782.46194 | 28910.32118 | 24909.3601  | 25784.38821 | 24244.55365 | 35267.04683 | 33897.29922 | 41444.88147 | 36511.07122 | 35884.66346 | 33357.34696 | 28624.52295 | 27852.6418  | 32142.19761 | 27518.77404 |
| Q4KM65 | Nudt21   | Cleavage and polyadenylation specificity factor subunit 5                  | 267.979 | 46.26 | 26240  | 7  | 104451.6553 | 95041.38535 | 104783.5325 | 98500.77125 | 94630.90079 | 78933.6122  | 78627.83449 | 72762.79505 | 84260.20581 | 70316.93369 | 98960.7336  | 84890.40967 | 81482.98012 | 87370.32732 | 96514.60583 |
| Q4KML4 | Abrac1   | Costars family protein ABRACL                                              | 125.207 | 66.67 | 9030   | 3  | 7292.134183 | 6478.885071 | 2512.220917 | 5587.426658 | 4564.38974  | 1341.723458 | 2940.696493 | 2769.109364 | 3150.99048  | 1961.165485 | 4099.475418 | 2771.99627  | 2637.958263 | 2659.419674 | 2407.980675 |
| Q4LDD4 | Arap1    | Arf-GAP with Rho-GAP domain, ANK repeat and PH domain-containing protein 1 | 92.416  | 3.17  | 162276 | 3  | 12614.59577 | 11862.19353 | 10728.91295 | 12125.68931 | 11299.20599 | 8948.316688 | 11218.93139 | 10493.41934 | 7543.832139 | 12521.92309 | 12363.73402 | 12575.77532 | 12072.85878 | 11945.41604 | 11409.40753 |
| Q4QR75 | Exosc9   | Exosome complex component RRP45                                            | 79.099  | 11.67 | 48882  | 3  | 14558.78112 | 16593.1387  | 16890.44553 | 15589.14858 | 17018.18227 | 16222.95205 | 15987.66666 | 16845.39172 | 16549.63175 | 13849.59108 | 13804.31694 | 16058.49653 | 13351.78361 | 14850.96149 | 14956.21199 |
| Q4QRB4 | Tubb3    | Tubulin beta-3 chain                                                       | 1113.19 | 33.11 | 50419  | 24 | 2812583.795 | 3095735.254 | 2848693.503 | 2972300.699 | 2714826.815 | 2349292.416 | 2414528.962 | 2219572.391 | 2497747.444 | 2575871.185 | 3106095.614 | 3007330.246 | 3003442.676 | 3078923.967 | 2628976.122 |
| Q4QRL3 | Cdc88b   | Coiled-coil domain-containing protein 88B                                  | 95.491  | 2.7   | 166608 | 4  | 15073.94098 | 18624.49052 | 19260.29557 | 12667.17191 | 14528.46423 | 15039.87765 | 16639.94856 | 11338.36183 | 16508.77329 | 16124.08459 | 15988.69993 | 17056.951   | 18117.94506 | 20750.88525 | 16787.83393 |
| Q4V7A0 | Wdr61    | WD repeat-containing protein 61                                            | 147.46  | 10.49 | 33747  | 2  | 11041.72148 | 9794.595987 | 9849.262225 | 11824.33143 | 11084.75655 | 7343.756003 | 9541.824921 | 10350.92537 | 10852.69092 | 8320.535474 | 8837.064196 | 11981.50339 | 11768.35117 | 10390.5444  | 9117.044909 |
| Q4V7C7 | Actr3    | Actin-related protein 3                                                    | 974.506 | 76.56 | 47357  | 29 | 1766075.745 | 1704942.151 | 1628515.25  | 1569365.28  | 1659848.89  | 1386354.518 | 1448919.285 | 1445146.229 | 1429707.8   | 1361007.267 | 1473985.096 | 1628892.312 | 1484060.951 | 1519311.815 | 1552936.122 |
| Q4V898 | Rbm3     | RNA-binding motif protein, X chromosome                                    | 185.454 | 15.9  | 42258  | 6  | 150907.4244 | 147283.9067 | 158125.8388 | 155359.6604 | 158738.423  | 141816.0855 | 158893.0026 | 131157.1101 | 138687.6531 | 140791.7249 | 154549.2873 | 151696.5249 | 167470.4711 | 159073.2872 | 148514.3243 |
| Q4V8C8 | Cdc73    | Parafibromin                                                               | 102.814 | 8.47  | 60603  | 4  | 9818.129163 | 12017.77321 | 11446.96283 | 10646.21146 | 10805.84683 | 8883.517562 | 8116.46445  | 11068.06648 | 11910.72134 | 7611.666828 | 10196.52511 | 11885.51674 | 11190.86182 | 12903.26641 | 9373.042412 |
| Q4V8H8 | Ehd2     | EH domain-containing protein 2                                             | 30.884  | 3.5   | 61237  | 2  | 33083.74988 | 31449.08842 | 32558.5885  | 30252.57054 | 30549.13918 | 32479.19296 | 32722.06407 | 29510.36087 | 33311.23027 | 32931.7312  | 34713.60338 | 32294.887   | 35146.98021 | 36140.49403 | 36037.12414 |
| Q4V8K2 | Cttnnb1  | Beta-catenin-like protein 1                                                | 104.16  | 9.06  | 64948  | 5  | 26626.91994 | 26853.9094  | 21826.15451 | 30039.85825 | 30417.02182 | 23773.74978 | 27030.31586 | 17774.27288 | 24726.19232 | 23727.12407 | 25906.52418 | 27387.56857 | 26301.36562 | 28088.79911 | 28337.33761 |
| Q4V8K5 | Brox     | BRO1 domain-containing protein BROX                                        | 159.807 | 18.98 | 46192  | 6  | 89511.90644 | 76706.43704 | 73721.89773 | 92703.96426 | 92597.77226 | 60909.21536 | 73999.79948 | 68531.71156 | 66268.85834 | 59426.895   | 85084.367   | 90901.61016 | 71812.74552 | 55224.17223 | 91838.39033 |
| Q4VA53 | Pds5b    | Sister chromatid cohesion protein PDS5 homolog B                           | 468.027 | 10.44 | 164419 | 11 | 58322.05629 | 54437.25539 | 62909.79678 | 60928.57552 | 57284.43997 | 46908.42811 | 54985.73    | 51596.09495 | 50658.09821 | 47993.31943 | 53761.32019 | 56179.63991 | 57167.93168 | 59508.21558 | 57484.31587 |
| Q4VC33 | Maea     | E3 ubiquitin-protein transferase MAEA                                      | 39.391  | 10.86 | 45336  | 2  | 1142.476001 | 1356.791908 | 1185.314258 | 1268.694664 | 1160.387894 | 945.4407156 | 1226.777003 | 1350.701126 | 1616.177346 | 1844.903963 | 1363.353849 | 1174.021251 | 1981.239981 | 1201.496364 | 1394.359575 |
| Q4VSI4 | Usp7     | Ubiquitin carboxyl-terminal hydrolase 7                                    | 111.74  | 7.62  | 128431 | 5  | 18074.14717 | 23545.41114 | 23011.13064 | 21631.46257 | 20414.89648 | 15901.01908 | 19068.99838 | 17340.63485 | 17218.91091 | 19288.84944 | 20475.70506 | 19591.35139 | 20354.15486 | 19806.57281 | 20735.91934 |
| Q501J6 | Ddx17    | Probable ATP-dependent RNA helicase DDX17                                  | 518.414 | 21.23 | 72399  | 11 | 382571.0964 | 394779.6148 | 400908.9914 | 385169.7072 | 408305.7987 | 344493.4887 | 359586.7877 | 358662.4066 | 346908.6849 | 317371.5553 | 349438.3321 | 356185.7016 | 341548.7244 | 337746.3795 | 362462.7091 |
| Q505F5 | Lrrc47   | Leucine-rich repeat-containing protein 47                                  | 52.9    | 5.51  | 63590  | 2  | 11613.5433  | 11433.05668 | 9143.527066 | 9642.712739 | 9745.668799 | 8735.835002 | 10787.65167 | 9252.686174 | 5131.81369  | 9425.62147  | 11703.48697 | 10777.29064 | 10628.70676 | 10073.08917 | 11139.93957 |
| Q52K18 | Srrm1    | Serine/arginine repetitive matrix protein 1                                | 188.869 | 7.29  | 106862 | 4  | 20975.69492 | 26786.63415 | 27189.71943 | 31318.00516 | 27441.88088 | 24579.28738 | 26243.64705 | 30000.20915 | 28620.55614 | 26987.63276 | 29875.85376 | 35379.45436 | 26794.70218 | 27659.96593 | 27913.14848 |
| Q53UA7 | Taok3    | Serine/threonine-protein kinase TAO3                                       | 199.228 | 8.46  | 105474 | 7  | 60489.16505 | 64976.51773 | 63679.88612 | 62499.37005 | 68311.91825 | 62915.84217 | 62957.58382 | 63263.10873 | 63137.11634 | 66214.2362  | 70226.7957  | 67782.90726 | 69352.54815 | 65416.17723 | 68031.78984 |
| Q56BZ6 | Ist1     | IST1 homolog                                                               | 30.577  | 4.37  | 39942  | 2  | 29229.27588 | 28229.80586 | 30006.92311 | 26951.49598 | 28852.98906 | 21458.1813  | 23527.56004 | 23585.13805 | 21060.87815 | 22350.27129 | 28124.49394 | 29527.47193 | 28100.6788  | 30162.50346 | 29263.49928 |
| Q569Z5 | DDX46    | Probable ATP-dependent RNA helicase DDX46                                  | 110.456 | 7.95  | 117448 | 8  | 95368.04566 | 86651.61868 | 84860.4266  | 96289.01287 | 95277.03472 | 107070.2033 | 89382.09945 | 94456.97969 | 95170.49521 | 89994.63269 | 85468.40658 | 95596.85973 | 94909.37597 | 87231.60282 | 87658.32077 |
| Q569Z6 | Thrap3   | Thyroid hormone receptor-associated protein 3                              | 155.525 | 9.57  | 108178 | 6  | 38941.18454 | 25087.79985 | 32845.90689 | 36303.03421 | 31278.42971 | 22169.063   | 25250.42224 | 24093.65307 | 32559.87017 | 30315.11701 | 26503.04156 | 30454.76656 | 32289.80836 | 22043.90257 | 29231.74461 |
| Q571E4 | Gains    | N-acetylgalactosamine-6-sulfatase                                          | 163.699 | 25.77 | 57673  | 7  | 51617.48605 | 44505.06976 | 23999.49399 | 37197.71664 | 30920.64407 | 20834.83102 | 21456.83516 | 22093.23098 | 17908.89949 | 24035.33821 | 30718.95774 | 31565.5298  | 35378.47977 | 31256.81472 | 26642.8837  |
| Q571I9 | Aldh16a1 | Aldehyde dehydrogenase family 16 member A1                                 | 241.958 | 13.47 | 84756  | 7  | 53071.13709 | 54356.22411 | 54163.51618 | 54131.22864 | 50558.61801 | 43078.79398 | 43293.42912 | 45555.16405 | 42659.22535 | 41081.78746 | 46434.34188 | 49377.74487 | 43997.8391  | 43720.82352 | 51199.78038 |
| Q58A65 | Spag9    | C-Jun-amino-terminal kinase-interacting protein 4                          | 485.956 | 14.91 | 146219 | 15 | 123751.4524 | 123351.1902 | 110301.12   | 118169.0009 | 112569.005  | 119174.1283 | 128603.2823 | 121638.941  | 122629.5207 | 128927.7941 | 114450.5766 | 119365.5361 | 124725.6407 | 121667.6011 | 133728.7562 |
| Q5BJP6 | Gfm2     | Ribosome-releasing factor 2, mitochondrial                                 | 53.038  | 5.26  | 85914  | 2  | 5413.826882 | 4906.565261 | 5197.015928 | 5762.704241 | 6324.681398 | 5206.972031 | 7404.351164 | 7395.222423 | 4748.316413 | 5723.457472 | 5859.740098 | 5863.410839 | 5415.06077  | 4937.131267 | 5675.570921 |
| Q5BJS0 | Dhx30    | ATP-dependent RNA helicase DHX30                                           | 86.006  | 3.02  | 133997 | 3  | 8205.62142  | 9570.055576 | 3245.592181 | 8772.03737  | 8588.041454 | 9905.753645 | 9795.961149 | 9753.053367 | 11058.86522 | 9310.624167 | 6650.393    | 9318.131304 | 8498.984604 | 10169.32752 | 9954.627612 |
| Q5F285 | Tmem256  | Transmembrane protein 256                                                  | 76.311  | 31.86 | 11656  | 2  | 33112.33238 | 31414.20299 | 32556.46779 | 32373.0902  | 28818.59895 | 34652.99475 | 30899.20393 | 27871.91626 | 32020.64298 | 36668.60308 | 31753.63091 | 27551.55524 | 38639.33479 | 29628.43304 | 36389.20218 |
| Q5FVM4 | Nono     | Non-POU domain-containing octamer-binding protein                          | 433.828 | 26.47 | 54925  | 12 | 276780.9835 | 269520.0566 | 238543.1654 | 341736.6444 | 328513.3133 | 197334.623  | 207591.8157 | 260489.5108 | 275234.3355 | 196783.4636 | 290609.1145 | 306539.6429 | 314707.9225 | 233772.3936 | 236538.6827 |
| Q5FWK3 | Arhgap1  | Rho GTPase-activating protein 1                                            | 222.831 | 31.89 | 50411  | 9  | 48830.07047 | 42593.1852  | 36523.37057 | 34618.40106 | 32952.90055 | 18463.88409 | 28107.74492 | 27820.39439 | 31418.68188 | 28058.37765 | 27186.56088 | 24534.25087 | 29733.3225  | 29983.6037  | 25062.1509  |
| Q5FWT7 | Ublcp1   | Ubiquitin-like domain-containing CTD phosphatase 1                         | 73.499  | 8.81  | 36867  | 2  | 2971.733572 | 4958.760601 | 5241.04152  | 5021.189559 | 4234.776754 | 3359.821373 | 5096.500015 | 5756.237974 | 5586.485077 | 4435.546915 | 5163.797634 | 5576.916492 | 4636.318537 | 3856.204274 | 5757.159202 |
| Q5HZY2 | Sar1b    | GTP-binding protein SAR1b                                                  | 136.593 | 33.84 | 22410  | 4  | 11630.89059 | 10201.30365 | 10047.66407 | 9011.973526 | 10085.90498 | 10720.51581 | 10692.56224 | 11553.74447 | 12144.73274 | 8754.489714 | 11074.74467 | 8918.531105 | 10479.44059 | 10368.55604 | 9414.259983 |
| Q5IOE7 | Tmed9    | Transmembrane emp24 domain-containing protein 9                            | 65.897  | 8.94  | 27028  | 2  | 45228.27238 | 50973.32113 | 48133.73875 | 49926.57109 | 52561.96465 | 57093.55397 | 54511.64738 | 49968.07899 | 52711.53387 | 52305.5368  | 52263.78682 | 48744.96643 | 51773.41638 | 49642.44957 | 47800.07701 |
| Q5IOH4 | Tmco1    | Calcium load-activated calcium channel                                     | 107.898 | 19.68 | 21175  | 3  | 57800.30508 | 59119.51373 | 54312.47477 | 56455.67237 | 50699.34013 | 59126.26518 | 71282.64104 | 61628.98277 | 61824.91489 | 61044.49184 | 52676.82761 | 57165.82872 | 49651.42453 | 57343.70673 | 57460.98422 |
| Q5M7W1 | Txnip    | Thioredoxin-interacting protein                                            | 103.107 | 7.11  | 44018  | 3  | 20962.99141 | 18833.04871 |             |             |             |             |             |             |             |             |             |             |             |             |             |

|         |         |                                                                         |         |       |        |    |               |             |             |             |             |             |             |             |             |             |             |             |             |             |             |
|---------|---------|-------------------------------------------------------------------------|---------|-------|--------|----|---------------|-------------|-------------|-------------|-------------|-------------|-------------|-------------|-------------|-------------|-------------|-------------|-------------|-------------|-------------|
| Q5PPK9  | Eipr1   | EARP and GARP complex-interacting protein 1                             | 20.754  | 5.7   | 43157  | 2  | 6511.516164   | 11857.29875 | 11009.34021 | 6682.294242 | 13897.05903 | 11930.60057 | 5796.224016 | 12093.61746 | 13125.40985 | 5272.338506 | 6046.279308 | 14149.83717 | 13437.46823 | 13172.54868 | 12529.17302 |
| Q5PQL2  | Cnot9   | CCR4-NOT transcription complex subunit 9                                | 87.826  | 13.71 | 33601  | 3  | 4082.696539   | 5422.856108 | 4709.99879  | 5469.990126 | 3443.493021 | 4919.885582 | 4004.460795 | 3964.181129 | 5213.715249 | 5779.042213 | 4520.258451 | 4974.762568 | 5187.538579 | 5161.063914 | 4409.171195 |
| Q5PQL7  | Itm2c   | Integral membrane protein 2C                                            | 100.581 | 16.36 | 30480  | 2  | 9027.525895   | 8825.450672 | 7606.42546  | 8463.814369 | 7256.727749 | 6033.284753 | 9490.328697 | 9015.212901 | 10420.62755 | 10267.21173 | 8712.973299 | 8259.913762 | 9413.955272 | 5067.13466  | 8361.201335 |
| Q5RQU8  | Calmh2  | Calcium homeostasis modulator protein 2                                 | 80.793  | 9.6   | 35931  | 3  | 3561.209358   | 4117.119468 | 5068.17975  | 4516.991491 | 5155.971065 | 2909.925956 | 1232.810405 | 4249.972822 | 1966.383563 | 2709.763053 | 4384.126608 | 3866.522877 | 4474.632116 | 5079.767148 | 2747.265516 |
| Q5RK09  | Eif3g   | Eukaryotic translation initiation factor 3 subunit G                    | 45.846  | 9.69  | 35651  | 3  | 43589.02287   | 44396.205   | 18825.62933 | 45899.9155  | 17640.64898 | 50197.99594 | 50920.32831 | 57163.1226  | 54529.81172 | 52158.22552 | 47268.3534  | 17140.44442 | 48110.06296 | 18246.07819 | 44371.64419 |
| Q5RK19  | Snf8    | Vacuolar-sorting protein SNF8                                           | 54.292  | 10.85 | 28884  | 2  | 10759.76383   | 4664.18462  | 12126.93025 | 10099.61712 | 10363.51076 | 10463.54121 | 12714.32079 | 11718.12425 | 10556.49086 | 10188.85486 | 10397.48547 | 10658.24333 | 10866.03932 | 9659.239557 | 11013.56321 |
| Q5RKH0  | Glyr1   | Putative oxidoreductase GLYR1                                           | 137.288 | 15.58 | 60421  | 5  | 24412.86348   | 18939.52564 | 23586.49491 | 21317.63887 | 19651.98663 | 20331.66309 | 24171.47277 | 12669.61934 | 20096.03783 | 22052.12721 | 23531.53857 | 17923.69059 | 16447.62976 | 22416.10646 | 25802.74974 |
| Q5SF07  | Igf2bp2 | Insulin-like growth factor 2 mRNA-binding protein 2                     | 92.866  | 4.56  | 65584  | 2  | 7870.146324   | 9008.782535 | 7396.803104 | 8628.695909 | 6502.567311 | 6370.768983 | 6693.734266 | 6495.010978 | 6399.67889  | 6444.060403 | 10133.34662 | 7346.271626 | 6493.504157 | 6490.099207 | 6056.516966 |
| Q5SQX6  | Cyflp2  | Cytoplasmic FMR1-interacting protein 2                                  | 405.784 | 12.13 | 145659 | 12 | 119701.2327   | 131291.2276 | 107643.3264 | 114642.3722 | 111740.1708 | 92649.23763 | 115526.3223 | 114284.3848 | 117739.1686 | 113238.5853 | 104040.6805 | 113586.226  | 120343.9906 | 116928.1499 | 115562.7084 |
| Q5SSL4  | Abr     | Active breakpoint cluster region-related protein                        | 138.765 | 8.5   | 97667  | 5  | 35951.80832   | 36135.44558 | 32211.71189 | 32519.26612 | 36357.83516 | 21597.37262 | 26624.06958 | 26189.14291 | 27570.90555 | 12617.71022 | 34525.83613 | 36126.14696 | 16494.93879 | 34093.43055 | 16220.41075 |
| Q5SSZ5  | Tns3    | Tensin-3                                                                | 99.934  | 2.92  | 155589 | 2  | 1672.916438   | 1931.002578 | 1366.526116 | 1185.949528 | 1931.066617 | 6749.083659 | 6626.062282 | 2523.573115 | 5631.795482 | 1432.960599 | 1697.357521 | 1711.026619 | 5526.015726 | 1598.026404 | 1658.302533 |
| Q5SUA5  | Myo1g   | Unconventional myosin-Ig                                                | 451.415 | 19.82 | 117227 | 15 | 113588.1195   | 94621.11166 | 92960.47978 | 94553.04217 | 97848.70048 | 101606.1466 | 92949.42187 | 100502.5965 | 99749.31342 | 100910.5525 | 92467.35242 | 80666.69393 | 107930.8867 | 99297.6652  | 108584.3462 |
| Q5SUF2  | Luc7i3  | Luc7-like protein 3                                                     | 234.75  | 15.74 | 51450  | 4  | 8953.687337   | 12545.71491 | 15053.82489 | 14363.08781 | 17011.12013 | 14628.05877 | 17613.93291 | 19339.41314 | 9599.968441 | 13423.11786 | 9047.336283 | 15306.98892 | 17198.30471 | 14386.37625 | 16259.53427 |
| Q5SUQ9  | Ctc1    | CST complex subunit CTC1                                                | 84.872  | 4.04  | 134028 | 3  | 9655.508909   | 8157.568005 | 7264.729988 | 7323.410559 | 3928.298046 | 7276.517136 | 7341.562261 | 6249.993524 | 7177.243326 | 5930.840661 | 6529.396475 | 8070.266444 | 7257.031704 | 7128.958305 | 7983.002769 |
| Q5SUR0  | Pfas    | Phosphoribosylformylglycinamidine synthase                              | 587.731 | 26.78 | 144629 | 19 | 162586.0237   | 190841.2583 | 180979.3116 | 156914.8044 | 170403.0378 | 110112.838  | 122482.193  | 147360.8808 | 122632.8557 | 120926.491  | 147711.0848 | 168394.5214 | 161639.4038 | 167991.8069 | 156027.5431 |
| Q5SVR0  | Tbc1d9b | TBC1 domain family member 9B                                            | 117.917 | 5.38  | 141779 | 3  | 1231.576879   | 7695.843186 | 7246.070912 | 7653.695246 | 6092.166919 | 4168.352429 | 6261.519891 | 7015.096384 | 6515.44982  | 4673.802168 | 6280.13292  | 7706.476578 | 6808.442073 | 5276.022271 | 6556.920583 |
| Q5U216  | Ddx39a  | ATP-dependent RNA helicase DDX39A                                       | 493.935 | 43.09 | 49109  | 14 | 561718.7321   | 608585.1089 | 602266.4299 | 603949.9429 | 627965.6437 | 615932.3223 | 614283.1545 | 648608.1493 | 597712.1883 | 603089.5378 | 566968.7821 | 646399.2621 | 610795.5955 | 653125.6317 | 644660.3592 |
| Q5U2M6  | Dcaf8   | DDI1- and CUL4-associated factor 8                                      | 33.859  | 7.61  | 66156  | 3  | 4148.764582   | 13672.37116 | 10517.58118 | 11579.50194 | 11011.5231  | 10802.03501 | 10802.78089 | 10295.9215  | 10666.62187 | 11919.45191 | 10411.62605 | 11873.98471 | 11313.96662 | 11778.14048 | 10590.95404 |
| Q5U2Q7  | Etf1    | Eukaryotic peptide chain release factor subunit 1                       | 237.92  | 24.94 | 49031  | 9  | 67121.51218   | 78506.33735 | 53044.30351 | 73661.70371 | 68082.90023 | 69766.30502 | 84668.63393 | 90579.91776 | 53083.09198 | 72745.0306  | 67879.72715 | 53644.07907 | 46773.1455  | 50031.35099 | 54143.19547 |
| Q5U2R0  | Mat2b   | Methionine adenosyltransferase 2 subunit beta                           | 219.535 | 23.65 | 37375  | 5  | 46696.22901   | 48949.34644 | 48121.23796 | 51436.79507 | 48538.74792 | 41249.09108 | 44280.90572 | 45267.08457 | 39959.87828 | 43664.99795 | 45516.51884 | 42744.55754 | 46525.38813 | 49719.73151 | 46176.28891 |
| Q5U2U0  | Clpx    | ATP-dependent Clp protease ATP-binding subunit clpX-like, mitochondrial | 66.44   | 3.79  | 69208  | 2  | 3507.794199   | 4361.505095 | 4948.785685 | 3993.649937 | 3744.060565 | 4187.704393 | 5626.992438 | 3971.194157 | 4664.947871 | 4644.066916 | 3576.311214 | 4607.193602 | 3707.566608 | 3873.014383 | 3913.498455 |
| Q5U2X6  | Cdc47   | Coiled-coil domain-containing protein 47                                | 32.37   | 5.59  | 55733  | 2  | 13682.20957   | 15981.18046 | 14169.39306 | 15361.51376 | 14531.27256 | 15199.87178 | 17711.11232 | 16179.08774 | 15712.99616 | 15690.7839  | 15198.26481 | 15401.89436 | 14200.31814 | 13891.89007 | 15903.98031 |
| Q5U316  | Rab35   | Ras-related protein Rab-35                                              | 177.192 | 30.35 | 23025  | 5  | 11840.5737    | 12677.6819  | 17654.15372 | 17237.97201 | 11600.16178 | 12562.02139 | 20313.16734 | 13434.56855 | 9121.249604 | 17126.52023 | 13486.1514  | 12258.27433 | 10914.96972 | 12734.33718 | 9268.387285 |
| Q5U317  | Fip1i1  | Pre-mRNA 3'-end-processing factor FIP1                                  | 51.334  | 10.45 | 60188  | 2  | 4937.598654   | 5018.151049 | 3463.421025 | 3971.633006 | 2266.918798 | 2150.853699 | 3486.431872 | 2058.418259 | 3278.717922 | 2798.18312  | 3719.352961 | 3728.453546 | 3158.012966 | 3103.690045 | 2734.156015 |
| Q5FW8   | Sec13   | Protein SEC13 homolog                                                   | 117.126 | 22.67 | 35548  | 4  | 32993.26852   | 28381.51548 | 27039.44847 | 31861.55125 | 30902.84148 | 38513.77677 | 18400.97217 | 34724.70276 | 35087.96544 | 18866.91254 | 17082.58772 | 21145.98338 | 25797.54537 | 34886.58812 | 29603.65766 |
| Q5XG71  | Utp20   | Small subunit processome component 20 homolog                           | 39.868  | 0.93  | 317744 | 2  | 4147.137824   | 3990.909858 | 3863.092805 | 3836.485009 | 4516.362    | 4227.408078 | 3564.407917 | 4444.05511  | 4951.234965 | 1826.893605 | 4389.879799 | 3845.888993 | 5126.610419 | 4325.944398 | 4553.082562 |
| Q5XI28  | Raver1  | Ribonucleoprotein PTB-binding 1                                         | 121.315 | 9.22  | 79289  | 4  | 34441.20019   | 29722.93678 | 26301.93535 | 31779.1466  | 27131.35736 | 21547.8228  | 29303.67611 | 23615.35477 | 24188.34415 | 28319.67309 | 32882.7771  | 30369.21263 | 28927.54075 | 29047.6483  | 30439.6345  |
| Q5XI31  | Pigs    | GPI transamidase component PIG-S                                        | 251.113 | 17.84 | 61724  | 6  | 36620.83149   | 37715.98669 | 32315.63389 | 31443.36269 | 30773.09849 | 38533.83806 | 39281.11352 | 39038.13236 | 40020.20459 | 36346.46102 | 33901.77182 | 36226.06328 | 29191.91159 | 29797.46038 | 34538.20237 |
| Q5XI42  | Aldh3b1 | Aldehyde dehydrogenase family 3 member B1                               | 162.562 | 9.83  | 52147  | 4  | 36639.12686   | 43993.51771 | 37735.69485 | 36338.2352  | 36729.32352 | 42694.32533 | 41452.47538 | 34753.86064 | 38974.24245 | 43570.21483 | 44614.71219 | 41793.06218 | 40722.66162 | 39899.1337  | 33877.38392 |
| Q5XI72  | Eif4h   | Eukaryotic translation initiation factor 4H                             | 172.757 | 27.02 | 27324  | 5  | 103195.7983   | 94162.35284 | 106601.3722 | 86008.24237 | 91348.84231 | 75900.61004 | 87672.52991 | 75426.85841 | 80600.29896 | 79030.70027 | 94454.56089 | 85413.02588 | 94123.35967 | 85847.76208 | 84555.56136 |
| Q5XI73  | Arhgdia | Rho GDP-dissociation inhibitor 1                                        | 574.961 | 77.94 | 23407  | 15 | 1329253.127   | 1394223.181 | 1243687.006 | 1284243.592 | 1212135.717 | 930104.4115 | 1040009.049 | 1015409.171 | 1056539.656 | 1019467.658 | 1248651.194 | 1187474.257 | 1209901.182 | 1182092.692 | 1120206.113 |
| Q5XI81  | Fxr1    | Fragile X mental retardation syndrome-related protein 1                 | 163.162 | 6.16  | 63947  | 3  | 40668.46406   | 32185.69417 | 38930.63975 | 37208.34824 | 34220.11252 | 41174.32743 | 42280.74311 | 41196.12123 | 42642.48684 | 40146.18419 | 33090.61012 | 37635.42748 | 39739.63349 | 39230.18514 | 38292.16984 |
| Q5XI83  | UPF0505 | protein C16orf62 homolog                                                | 143.199 | 4.49  | 106151 | 3  | 10663.46018   | 7313.718101 | 7138.054892 | 7810.423125 | 7333.176611 | 4603.796667 | 6541.331745 | 7416.326218 | 6707.988802 | 5168.332822 | 7213.326638 | 7817.758499 | 6061.830983 | 6140.296817 | 6298.19052  |
| Q5XIA1  | Ncln    | Nicalin                                                                 | 121.531 | 8.7   | 62992  | 4  | 11330.55737   | 11911.85496 | 11476.20702 | 13136.71636 | 10633.2309  | 12807.71397 | 11187.67431 | 10865.0956  | 12389.66451 | 15188.6728  | 12824.72454 | 11844.63499 | 9823.405783 | 13447.73408 | 11507.51679 |
| Q5XIA4  | Cnot10  | CCR4-NOT transcription complex subunit 10                               | 50.369  | 2.96  | 81819  | 2  | 0.008226335   | 1612.957509 | 5565.029573 | 2032.049733 | 1971.848299 | 2088.296212 | 1638.023175 | 5284.637694 | 4739.509135 | 2773.494753 | 5295.00559  | 5243.650385 | 5619.373644 | 2466.485523 | 6992.857751 |
| Q5XIG8  | Strap   | Serine-threonine kinase receptor-associated protein                     | 433.385 | 52.86 | 38456  | 12 | 98474.02988   | 110669.5258 | 98729.17669 | 107124.2866 | 99949.55119 | 116158.3558 | 113822.6033 | 111502.451  | 113179.2125 | 106028.2616 | 90798.92706 | 96434.08543 | 97477.51064 | 96939.76475 | 107360.8742 |
| Q5XIPE6 | Fen1    | Flap endonuclease 1                                                     | 128.983 | 21.32 | 42609  | 5  | 110674.3433   | 124623.4381 | 115295.0725 | 112882.8868 | 127345.3272 | 97988.9717  | 104580.3014 | 102051.7032 | 99004.45116 | 89945.81421 | 116772.7012 | 122345.6676 | 119407.8472 | 112500.1621 | 122774.7498 |
| Q5XIW8  | Sart1   | U4/U6,U5 tri-snRNP-associated protein 1                                 | 78.484  | 3.47  | 91011  | 2  | 9079.414533   | 7412.986151 | 9434.138256 | 5143.340635 | 12467.98811 | 8166.336504 | 6798.123636 | 9086.38834  | 9170.364766 | 5638.188296 | 10646.11585 | 9756.08006  | 8721.314011 | 6186.183705 | 11098.7608  |
| Q5XJY5  | Arcn1   | Coatomer subunit delta                                                  | 358.462 | 29.16 | 57229  | 13 | 196192.4791   | 206852.5107 | 199564.4102 | 206922.9433 | 196325.631  | 193691.7344 | 213561.9078 | 226343.7165 | 216162.3061 | 204897.2557 | 191096.2597 | 205283.4261 | 180052.3834 | 208418.7746 | 191726.8348 |
| Q5XKR3  | Arhgef6 | Rho guanine nucleotide exchange factor 6                                | 58.264  | 5.57  | 87013  | 3  | 24628.58679</ |             |             |             |             |             |             |             |             |             |             |             |             |             |             |

|        |          |                                                                                   |          |       |        |    |             |             |             |             |             |             |             |             |             |             |             |             |             |             |             |
|--------|----------|-----------------------------------------------------------------------------------|----------|-------|--------|----|-------------|-------------|-------------|-------------|-------------|-------------|-------------|-------------|-------------|-------------|-------------|-------------|-------------|-------------|-------------|
| Q60634 | Flot2    | Flotillin-2                                                                       | 156.587  | 19.63 | 47038  | 6  | 22616.62054 | 27558.67361 | 26241.90875 | 28586.66937 | 20491.30815 | 18240.48371 | 20413.41997 | 23181.58309 | 19652.71498 | 22727.38077 | 25309.3329  | 25503.02956 | 26659.09129 | 26945.29597 | 29121.41135 |
| Q60668 | Hnmpr    | Heterogeneous nuclear ribonucleoprotein D0                                        | 240.764  | 22.54 | 38354  | 7  | 220214.6122 | 204550.1938 | 216852.1848 | 212401.4121 | 196266.3814 | 146643.4007 | 174920.7416 | 157429.2552 | 173467.1085 | 184576.8443 | 207717.6869 | 207856.7644 | 207018.1261 | 218611.1389 | 194459.6019 |
| Q60692 | Psmb6    | Proteasome subunit beta type-6                                                    | 88.712   | 25.21 | 25379  | 3  | 66424.88554 | 64351.03789 | 64294.13645 | 64340.04724 | 63792.60533 | 52010.3056  | 65632.9363  | 75454.1451  | 61847.97    | 55045.56917 | 60690.90991 | 67164.72896 | 60813.39858 | 57901.31398 | 56107.29218 |
| Q60710 | Samhd1   | Deoxynucleoside triphosphate triphosphohydrolase SAMHD1                           | 668.224  | 44.38 | 75893  | 21 | 505010.4566 | 373497.1621 | 485182.0759 | 475224.7725 | 344538.6262 | 295141.222  | 323234.7323 | 294107.2208 | 318118.0581 | 338241.5975 | 465358.6438 | 330105.6472 | 354694.4106 | 390086.9545 | 370168.6212 |
| Q60749 | Khdrbs1  | KH domain-containing, RNA-binding, signal transduction-associated protein 1       | 133.223  | 14.22 | 48371  | 5  | 92468.27038 | 81439.19341 | 98077.40499 | 109757.8883 | 85495.55615 | 79833.03693 | 92202.16013 | 73191.72386 | 94229.18125 | 99886.07695 | 87228.7623  | 81787.84347 | 72634.71149 | 100000.5927 | 88510.5209  |
| Q60759 | Gcdh     | Glutaryl-CoA dehydrogenase, mitochondrial                                         | 34.53    | 5.94  | 48606  | 2  | 7488.497836 | 6194.620028 | 6689.850723 | 5992.205974 | 6796.957943 | 6873.254854 | 6858.070847 | 7284.632289 | 6683.63093  | 8938.410725 | 6917.087596 | 6679.402033 | 6701.003983 | 6948.730543 | 6913.006134 |
| Q60766 | Irgm1    | Immunity-related GTPase family M protein 1                                        | 63.557   | 5.13  | 46552  | 2  | 3109.406682 | 2624.338575 | 2939.70212  | 3009.784256 | 2047.555549 | 2438.742382 | 2559.855659 | 2966.466193 | 2679.376071 | 2288.623299 | 2781.984115 | 2484.923126 | 2584.757025 | 2439.600582 | 2423.916757 |
| Q60770 | Stxbp3   | Syntaxin-binding protein 3                                                        | 185.306  | 17.74 | 67942  | 8  | 41791.46578 | 40750.80301 | 38270.44226 | 38075.65951 | 33812.65734 | 29742.05391 | 32159.93991 | 31519.31786 | 29386.17162 | 34653.77828 | 36757.44659 | 37599.55434 | 36363.08757 | 40730.52562 | 37514.95987 |
| Q60787 | Lcp2     | Lymphocyte cytosolic protein 2                                                    | 55.921   | 5.82  | 60238  | 2  | 5270.589397 | 9242.549093 | 5658.393758 | 8365.674389 | 3943.244042 | 8111.194314 | 5934.274955 | 6261.067062 | 6674.353124 | 5198.182162 | 7612.479887 | 5001.687782 | 5050.993131 | 4782.572692 | 4928.395804 |
| Q60790 | Rasa3    | Ras GTPase-activating protein 3                                                   | 74.747   | 6.24  | 95987  | 3  | 5867.73805  | 10570.88269 | 6514.075305 | 9149.384172 | 6059.950733 | 6244.469451 | 7473.672411 | 6540.599479 | 8501.081855 | 6240.276529 | 3483.549298 | 8861.669715 | 6191.038587 | 8929.89336  | 9701.871003 |
| Q60854 | Serpinb6 | Serpin B6                                                                         | 1109.272 | 64.81 | 42599  | 24 | 660602.5734 | 723713.6316 | 579163.4549 | 715942.4348 | 683350.5356 | 415486.4148 | 463123.1615 | 365765.8905 | 417954.4565 | 495858.9962 | 604772.3479 | 624981.1813 | 659147.5828 | 613749.7362 | 633045.2546 |
| Q60855 | Ripk1    | Receptor-interacting serine/threonine-protein kinase 1                            | 56.794   | 3.2   | 74854  | 2  | 6949.186489 | 7435.507025 | 6817.591453 | 6675.169441 | 6849.478715 | 4278.405916 | 4973.819531 | 6544.64902  | 5172.007929 | 6142.997139 | 5734.576533 | 7225.109475 | 6610.561922 | 6349.848735 | 6881.857542 |
| Q60864 | Stip1    | Stress-induced-phosphoprotein 1                                                   | 602.769  | 40.33 | 62582  | 21 | 225011.8655 | 231613.9167 | 239814.8125 | 211331.5845 | 207610.595  | 196726.0452 | 224409.6718 | 223671.3005 | 228233.368  | 203628.3214 | 238859.3151 | 209478.0684 | 258236.2948 | 259641.4778 | 235451.129  |
| Q60872 | Eif1a    | Eukaryotic translation initiation factor 1A                                       | 127.34   | 18.06 | 16502  | 2  | 9925.427311 | 11980.1086  | 9952.081646 | 10272.49816 | 9087.118518 | 5927.535411 | 6892.16344  | 6289.517158 | 4586.530798 | 6122.859081 | 10010.16497 | 7215.100771 | 8125.182003 | 7736.860846 | 8111.428577 |
| Q60875 | Arhgef2  | Rho guanine nucleotide exchange factor 2                                          | 554.589  | 18.78 | 111974 | 13 | 155024.113  | 156775.7972 | 137978.4129 | 145334.8187 | 154501.8892 | 140079.9026 | 156975.7661 | 148216.1833 | 143139.3058 | 136948.0784 | 147175.5312 | 144008.2917 | 148200.5767 | 145097.2428 | 149974.5007 |
| Q60902 | Eps15l1  | Epidermal growth factor receptor substrate 15-like 1                              | 75.536   | 5.51  | 99309  | 4  | 37133.82577 | 34636.58992 | 28899.51462 | 31580.35834 | 27206.35556 | 15783.43027 | 22943.98894 | 20570.67845 | 23649.24384 | 33461.71813 | 36160.36595 | 38122.16376 | 27521.35836 | 31958.24817 | 31656.24269 |
| Q60931 | Vdac3    | Voltage-dependent anion-selective channel protein 3                               | 444.29   | 43.11 | 30753  | 9  | 302487.3271 | 315348.568  | 301203.9735 | 293642.1846 | 314706.3862 | 372556.7556 | 360616.6999 | 329930.1402 | 356257.4805 | 341221.8028 | 280655.0482 | 316139.7247 | 308659.3126 | 328859.5007 | 321541.5499 |
| Q60953 | Pml      | Protein PML                                                                       | 152.894  | 7.01  | 98242  | 5  | 17947.97986 | 28717.65352 | 25147.95204 | 20146.85578 | 18592.04521 | 21456.49832 | 19371.12386 | 21257.94736 | 20047.53059 | 15926.83427 | 13219.76256 | 23775.5281  | 26265.64407 | 19496.41669 | 19847.20151 |
| Q60967 | Papss1   | Bifunctional 3'-phosphoadenosine 5'-phosphosulfate synthase 1                     | 131.349  | 7.21  | 70794  | 3  | 17895.29019 | 15318.90568 | 13330.93335 | 14664.39868 | 13521.63715 | 14515.63064 | 14586.0423  | 16711.67823 | 13125.12287 | 11152.31237 | 15879.34203 | 16023.10908 | 14627.8962  | 12422.37726 | 15320.71864 |
| Q60972 | Rbbp4    | Histone-binding protein RBBP4                                                     | 374.339  | 49.18 | 47656  | 13 | 241303.5961 | 275081.5176 | 268106.9311 | 251629.0471 | 285202.7584 | 255843.6628 | 254290.5341 | 262437.0172 | 241991.3431 | 252610.3783 | 248416.4837 | 243552.1529 | 263709.9847 | 247768.268  | 246328.5719 |
| Q60973 | Rbbp7    | Histone-binding protein RBBP7                                                     | 381.971  | 45.18 | 47790  | 13 | 231723.1237 | 245471.0755 | 246474.2844 | 246962.1476 | 254979.9842 | 234363.2029 | 232192.6928 | 246248.7159 | 227513.899  | 224876.0175 | 230471.6616 | 229125.076  | 245432.5425 | 225460.6116 | 223609.753  |
| Q60996 | Ppp2r5c  | Serine/threonine-protein phosphatase 2A 56 kDa regulatory subunit gamma isoform   | 130.812  | 13.36 | 60824  | 5  | 20521.84183 | 26493.64537 | 22699.07934 | 25405.26396 | 25340.0982  | 23136.67392 | 27315.33716 | 24159.65146 | 23001.5154  | 22865.05322 | 18620.18029 | 22585.81133 | 21760.4464  | 31346.81543 | 25019.40123 |
| Q61024 | Asns     | Asparagine synthetase [glutamine-hydrolyzing]                                     | 443.18   | 32.8  | 64283  | 14 | 153758.409  | 234647.3831 | 232262.8818 | 252629.5044 | 221285.4997 | 177159.3427 | 278507.2502 | 294488.2625 | 280276.8778 | 237510.2681 | 241823.8418 | 262651.0031 | 212740.2455 | 233356.5795 | 247868.8965 |
| Q61029 | Tmpo     | Lamina-associated polypeptide 2, isoforms beta/delta/epsilon/gamma                | 868.001  | 53.98 | 50373  | 17 | 421957.8687 | 430376.5105 | 441895.5944 | 440749.8969 | 465645.2025 | 376990.9873 | 432734.2089 | 394799.3799 | 392833.216  | 395620.1408 | 388783.1737 | 430285.9096 | 444020.2657 | 412381.2964 | 439831.9384 |
| Q61035 | Hars     | Histidine-tRNA ligase, cytoplasmic                                                | 240.471  | 21.61 | 57432  | 9  | 101262.1488 | 117547.2555 | 118477.671  | 111212.3978 | 106370.3547 | 108947.5967 | 121064.8475 | 118674.9809 | 117460.9365 | 109397.8093 | 109342.4833 | 116188.6559 | 110699.3348 | 112779.2376 | 108293.2185 |
| Q61036 | Paik3    | Serine/threonine-protein kinase PAK 3                                             | 120.297  | 10.38 | 62398  | 5  | 59927.29812 | 55826.62997 | 58585.74192 | 60343.33988 | 58292.4904  | 49720.40715 | 52724.44655 | 55581.50097 | 52511.12486 | 52183.68373 | 54607.89218 | 53365.78879 | 57165.12066 | 59227.80675 | 60735.49232 |
| Q61072 | Adam9    | Disintegrin and metalloproteinase domain-containing protein 9                     | 130.389  | 9.59  | 92079  | 4  | 15993.91674 | 18652.44499 | 9534.500599 | 15956.40886 | 15878.46084 | 15277.23987 | 14523.91558 | 5170.492235 | 6507.47853  | 13260.49915 | 9889.019063 | 9249.350647 | 12219.79225 | 13658.93787 | 16363.64221 |
| Q61081 | Cdc37    | Hsp90 co-chaperone Cdc37                                                          | 260.866  | 21.37 | 44593  | 6  | 57375.82207 | 49135.38187 | 55387.02412 | 51341.48896 | 58436.399   | 50207.80303 | 55338.72348 | 59501.5786  | 50610.45643 | 45810.15078 | 56345.82253 | 51495.74349 | 55636.15113 | 56052.77453 | 47394.66354 |
| Q61093 | Cybb     | Cytochrome b-245 heavy chain                                                      | 329.147  | 37.89 | 65305  | 13 | 92345.41829 | 95114.95253 | 72173.37885 | 59977.42462 | 89216.13498 | 126171.5812 | 125386.5542 | 120332.9705 | 136941.4587 | 105463.0993 | 86907.01007 | 87251.15827 | 95345.81512 | 92847.84584 | 99382.32771 |
| Q61102 | Abcb7    | ATP-binding cassette sub-family B member 7, mitochondrial                         | 70.283   | 3.32  | 82581  | 2  | 17254.34555 | 17118.20478 | 16326.55973 | 18841.1027  | 16754.46418 | 14884.72345 | 17377.92116 | 12107.70864 | 14345.12807 | 20679.38205 | 18146.90792 | 15709.00226 | 13639.85313 | 18631.1037  | 18059.35233 |
| Q61151 | Ppp2r5e  | Serine/threonine-protein phosphatase 2A 56 kDa regulatory subunit epsilon isoform | 111.011  | 12.85 | 54713  | 4  | 8558.428377 | 10334.68765 | 10869.55393 | 14149.44007 | 12286.82528 | 10265.77631 | 12713.49882 | 11106.9578  | 9623.209325 | 10129.58089 | 8641.444641 | 9977.279668 | 9654.96472  | 12867.81341 | 14316.13379 |
| Q61160 | Fadd     | FAS-associated death domain protein                                               | 65.041   | 17.56 | 22960  | 2  | 4142.443137 | 3545.696266 | 2749.624737 | 3774.687544 | 2957.885463 | 2708.094929 | 2483.402799 | 2657.547601 | 3017.079003 | 2782.174919 | 3731.058974 | 2760.612009 | 2966.28012  | 3212.017143 | 1667.557442 |
| Q61164 | Ctcf     | Transcriptional repressor CTCF                                                    | 76.872   | 4.76  | 83745  | 3  | 32367.7606  | 29828.61587 | 25708.14323 | 34608.95711 | 30349.24798 | 23403.38837 | 25626.60615 | 27212.90435 | 27312.38149 | 24001.37672 | 27806.21776 | 31225.56253 | 28198.34582 | 30810.12324 | 28461.142   |
| Q61166 | Mapre1   | Microtubule-associated protein RP/EB family member 1                              | 342.639  | 41.42 | 30016  | 9  | 193075.6687 | 197740.677  | 167019.3995 | 161763.0166 | 183168.1194 | 172277.1253 | 161482.4529 | 167239.1906 | 170573.9107 | 169183.7966 | 168219.046  | 166850.2033 | 171962.1582 | 175295.581  | 181688.337  |
| Q61171 | Prdx2    | Peroxiredoxin-2                                                                   | 483.201  | 58.08 | 21779  | 12 | 705357.852  | 655334.5713 | 657060.5963 | 639043.0976 | 634092.629  | 621645.0094 | 674138.6781 | 620226.2079 | 651620.769  | 662318.6547 | 692949.2119 | 687285.0188 | 702919.4414 | 664686.3473 | 674906.3108 |
| Q61183 | Papola   | Poly(A) polymerase alpha                                                          | 33.647   | 3.8   | 82309  | 2  | 11179.77995 | 10965.59352 | 10779.80408 | 7178.608554 | 12738.15151 | 9066.150165 | 10626.93782 | 9354.735294 | 0.012083387 | 8688.962719 | 6010.929852 | 8443.472948 | 9931.850461 | 6471.171248 |             |
| Q61187 | Tsg101   | Tumor susceptibility gene 101 protein                                             | 84.606   | 12.28 | 44124  | 4  | 29500.6853  | 32339.5969  | 31138.97656 | 27858.18797 | 29654.06858 | 20025.10232 | 27882.58284 | 24539.80271 | 25906.63047 | 25129.81967 | 28555.53668 | 28902.22678 | 31342.51895 | 30279.98429 | 31758.94291 |
| Q61191 | Hcfc1    | Host cell factor 1                                                                | 498.608  | 10.12 | 210437 | 13 | 125159.5131 | 130614.5124 | 124347.8673 | 124767.1514 | 124000.0431 | 99320.84641 | 107680.534  | 113017.6502 | 99736.83733 | 104117.4075 | 107000.6771 | 115765.4239 | 114180.8501 | 101513.295  | 120377.5463 |
| Q61194 | Pik3c2a  | Phosphatidylinositol 4-phosphate 3-kinase C2 domain-containing subunit alpha      | 104.732  | 3.8   | 190758 | 4  | 13621.62158 | 12833.81081 | 11459.17    | 14013.89689 | 11360.32375 | 9146.650637 | 12543.73743 | 12253.31406 | 13316.22767 | 12052.17758 | 11676.46407 | 10881.82497 | 11827.31638 | 12334.35056 | 11416.43707 |
|        |          |                                                                                   |          |       |        |    |             |             |             |             |             |             |             |             |             |             |             |             |             |             |             |



|        |         |                                                          |          |       |        |    |             |             |             |               |             |             |             |             |             |             |             |             |             |             |             |
|--------|---------|----------------------------------------------------------|----------|-------|--------|----|-------------|-------------|-------------|---------------|-------------|-------------|-------------|-------------|-------------|-------------|-------------|-------------|-------------|-------------|-------------|
| Q61249 | Igfbp1  | Immunoglobulin-binding protein 1                         | 209.692  | 19.71 | 38971  | 5  | 18888.50912 | 14228.83734 | 17294.8619  | 16565.50542   | 18052.66072 | 17208.75226 | 14415.20888 | 13984.36862 | 18532.37356 | 20762.1487  | 12534.22662 | 18031.14246 | 20351.25921 | 16518.38485 | 18557.50576 |
| Q61263 | Soat1   | Sterol O-acetyltransferase 1                             | 202.63   | 14.26 | 63799  | 6  | 90734.74296 | 103792.5826 | 89639.83533 | 91594.48082   | 94171.49262 | 109550.1842 | 115940.132  | 119653.9414 | 119443.4457 | 104679.2063 | 87121.60007 | 107207.957  | 109591.5082 | 99097.03004 | 100217.6777 |
| Q61316 | Hspa4   | Heat shock 70 kDa protein 4                              | 1248.721 | 50.3  | 94133  | 30 | 570058.9199 | 606902.5621 | 582024.6847 | 604726.3685   | 582684.3427 | 560357.7775 | 620476.1612 | 615575.6105 | 621034.0917 | 525476.1654 | 542667.3037 | 576275.9079 | 522053.9617 | 568940.4549 | 576141.1121 |
| Q61390 | Cct6b   | T-complex protein 1 subunit zeta-2                       | 159.704  | 11.11 | 58185  | 5  | 126565.3445 | 136008.7533 | 140530.8558 | 143298.7328   | 158177.7001 | 152990.6338 | 159255.0104 | 127846.7244 | 163772.861  | 152871.3229 | 149721.9015 | 138786.0332 | 148133.8088 | 161146.8355 | 156187.1122 |
| Q61425 | Hadh    | Hydroxyacyl-coenzyme A dehydrogenase, mitochondrial      | 342.335  | 54.14 | 34464  | 9  | 120701.843  | 123153.0776 | 110002.9271 | 119194.1652   | 110554.6978 | 114833.6129 | 119599.9975 | 107088.7555 | 122101.7304 | 125028.8555 | 118938.6448 | 109418.23   | 125389.8952 | 119961.5829 | 119564.3283 |
| Q61490 | Alcam   | CD180 antigen                                            | 79.013   | 7.89  | 65092  | 3  | 5563.281873 | 8138.148084 | 9526.122362 | 7819.704832   | 8250.711751 | 8068.490923 | 9373.370124 | 8890.988167 | 9422.446873 | 8800.381088 | 9591.129499 | 8821.708984 | 9115.514269 | 7234.643538 | 8502.931213 |
| Q61510 | Trim25  | E3 ubiquitin ligase TRIM25                               | 188.355  | 15.93 | 71726  | 7  | 21222.86751 | 18863.78993 | 15262.47486 | 18079.95842   | 14700.52428 | 11692.11791 | 18328.33381 | 21829.5186  | 17824.99245 | 20407.26895 | 13344.21756 | 23122.78767 | 22415.5074  | 20597.30484 | 18106.09594 |
| Q61543 | Glg1    | Golgi apparatus protein 1                                | 509.839  | 17.28 | 133734 | 18 | 175279.7198 | 165377.3039 | 179032.2702 | 185238.4007   | 195213.9226 | 173062.1436 | 167739.4864 | 195825.442  | 200175.1273 | 131653.5572 | 151586.5666 | 178598.3897 | 145689.0353 | 154576.079  | 180163.9467 |
| Q61545 | Ewsr1   | RNA-binding protein EWS                                  | 59.664   | 4.43  | 68462  | 2  | 46720.73526 | 47904.92389 | 51072.16535 | 46099.14397   | 46196.12497 | 43018.08305 | 43693.2511  | 41130.42833 | 35057.89593 | 39678.96532 | 47289.06489 | 44257.62848 | 44011.62438 | 46609.73527 | 43485.22248 |
| Q61550 | Rad21   | Double-strand-break repair protein rad21 homolog         | 168.295  | 9.45  | 72083  | 5  | 33811.17191 | 48118.18402 | 42196.26458 | 45007.72303   | 49995.52703 | 46143.58014 | 43552.66064 | 38572.12349 | 36938.31562 | 43005.33567 | 33981.83371 | 37713.97117 | 45114.30485 | 48059.78929 | 49482.417   |
| Q61559 | Arhgdib | Rho GDP-dissociation inhibitor 2                         | 626.533  | 76.5  | 22851  | 15 | 906329.0669 | 954839.4473 | 749701.4953 | 953365.0663   | 831646.6576 | 554031.0455 | 712330.3845 | 756845.4341 | 710887.4133 | 753084.4863 | 705947.9152 | 900277.2379 | 853702.2324 | 813180.4586 | 790173.4884 |
| Q61655 | Ddx19a  | ATP-dependent RNA helicase DDX19A                        | 287.911  | 24.27 | 53933  | 7  | 64954.63375 | 80890.10909 | 69627.2839  | 72070.59519   | 71097.79375 | 66886.85768 | 71711.80608 | 72554.31913 | 68957.59922 | 73299.42344 | 72122.62097 | 73051.26218 | 64078.46031 | 58378.97261 | 70295.60304 |
| Q61656 | Ddx5    | Probable ATP-dependent RNA helicase DDX5                 | 720.907  | 37.62 | 69290  | 17 | 632698.3832 | 663860.2572 | 688241.1811 | 668341.1787   | 674778.5754 | 662589.957  | 679218.1982 | 664931.8982 | 647459.9272 | 612366.5152 | 633056.9334 | 636242.7084 | 637120.5629 | 618615.0229 | 655781.3962 |
| Q61686 | Cbx5    | Chromobox protein homolog 5                              | 139.648  | 18.85 | 22186  | 3  | 49362.02233 | 54164.80424 | 46912.4799  | 51829.07069   | 50157.42215 | 41020.97253 | 33184.07296 | 40552.74536 | 23389.6791  | 35131.1205  | 40249.44036 | 45330.81583 | 47204.99283 | 42488.27948 | 45513.78688 |
| Q61687 | Atrx    | Transcription regulator ATRX                             | 65.785   | 0.85  | 278587 | 2  | 4207.143018 | 5079.447756 | 2702.399057 | 4135.511732   | 4225.44898  | 3426.815825 | 3321.819056 | 3960.359325 | 3953.570126 | 3935.683125 | 4005.034053 | 4885.841097 | 4449.90632  | 3243.400654 | 3709.417362 |
| Q61699 | Hsp1    | Heat shock protein 105 kDa                               | 136.096  | 5.48  | 96407  | 3  | 35949.93272 | 55413.7372  | 45238.02594 | 49653.36392   | 40580.3996  | 41349.76829 | 44655.95049 | 50644.8099  | 47292.27381 | 29853.22288 | 25737.93557 | 36814.07445 | 28071.03798 | 35759.955   | 39120.43853 |
| Q61739 | Iltga6  | Integrin alpha-6                                         | 70.801   | 3.94  | 122159 | 3  | 9366.790247 | 12869.0838  | 14258.65671 | 12244.24417   | 9774.947505 | 10358.8074  | 6331.597482 | 6447.878452 | 6416.788241 | 10146.76893 | 5919.50843  | 4888.987871 | 12301.49213 | 8362.861071 | 6879.218226 |
| Q61749 | Eif2b4  | Translation initiation factor eIF-2B subunit delta       | 64.619   | 7.25  | 57624  | 2  | 3349.657587 | 2867.118096 | 9135.639207 | 5996.217735   | 5349.204116 | 2448.489718 | 7725.634504 | 3028.341867 | 2729.090689 | 3521.224311 | 2246.042477 | 2859.841116 | 1759.321925 | 1916.396536 | 2746.149855 |
| Q61792 | Lasp1   | LIM and SH3 domain protein 1                             | 265.161  | 40.68 | 29994  | 12 | 230908.6343 | 230513.1617 | 246331.2552 | 224309.3932   | 212244.0552 | 210817.7861 | 233793.7465 | 188793.6673 | 210439.4449 | 204744.3133 | 249224.1512 | 254737.4006 | 207214.9466 | 242863.189  | 218713.503  |
| Q61820 | Rasl2-9 | GTP-binding nuclear protein Ran, testis-specific isoform | 154.659  | 25    | 24452  | 6  | 495904.6931 | 507244.5035 | 498982.1684 | 478534.2936   | 544403.1662 | 473682.2528 | 488822.7564 | 489625.8853 | 472539.5618 | 447947.6692 | 489311.2938 | 494143.05   | 447004.4333 | 465193.2888 | 463605.2405 |
| Q61879 | Myh10   | Myosin-10                                                | 1972.797 | 32.44 | 228996 | 54 | 1591061.053 | 1582775.863 | 1407987.264 | 1458064.326   | 1430319.478 | 1374298.948 | 1381853.141 | 1362828     | 1366338.266 | 1374689.976 | 1447137.472 | 1421059.631 | 1489701.438 | 1512569.396 | 1487884.309 |
| Q61881 | Mcm7    | DNA replication licensing factor MCM7                    | 769.311  | 47.15 | 81211  | 25 | 303139.2148 | 323951.0881 | 330091.1086 | 347206.8042   | 309513.4761 | 294407.9218 | 313732.3839 | 324501.74   | 340314.974  | 337610.8067 | 335809.7872 | 284644.2317 | 331732.9741 | 345500.5024 | 315354.5991 |
| Q61941 | Nnt     | NAD(P) transhydrogenase, mitochondrial                   | 101.854  | 5.06  | 113838 | 4  | 40428.92551 | 41623.89147 | 37844.56676 | 37491.4304    | 40652.28778 | 34424.59631 | 40024.19221 | 33712.55379 | 39423.53903 | 34323.85058 | 36355.94225 | 38075.84544 | 33676.62757 | 38461.22398 | 40039.0112  |
| Q61990 | Pcbp2   | Poly(C)-binding protein 2                                | 555.288  | 49.17 | 38222  | 13 | 468765.5193 | 496582.2233 | 490541.1046 | 499343.271    | 495485.1186 | 455836.9172 | 457172.3825 | 433708.265  | 451750.868  | 404804.1699 | 419994.5322 | 441432.592  | 422240.818  | 432624.5204 | 484177.1324 |
| Q62048 | Pea15   | Astrocytic phosphoprotein PEA-15                         | 224.718  | 70.77 | 15054  | 6  | 106979.8303 | 95154.29978 | 65458.23118 | 93713.62023   | 87135.43644 | 54641.25323 | 53913.95037 | 46153.38147 | 74721.83394 | 48598.3756  | 93353.95535 | 78064.08294 | 82858.54544 | 62368.67794 | 69663.16694 |
| Q62086 | Pon2    | Serum paraoxonase/arylesterase 2                         | 98.867   | 14.12 | 39617  | 3  | 10041.74666 | 7229.991761 | 4169.749889 | 6361.043642   | 6544.073288 | 4013.55351  | 6598.56612  | 7274.436229 | 7652.013916 | 5025.68694  | 6924.513437 | 6757.4459   | 6952.508104 | 5127.242086 | 5941.025517 |
| Q62087 | Pon3    | Serum paraoxonase/lactonase 3                            | 320.242  | 38.42 | 39351  | 10 | 86186.08133 | 84739.74168 | 83319.83899 | 83342.7253    | 82974.72252 | 92292.32191 | 98278.49648 | 80292.45862 | 89689.0269  | 89510.13753 | 89190.93031 | 83239.95973 | 98627.28183 | 83119.66484 | 79193.77119 |
| Q62093 | Srsf2   | Serine/arginine-rich splicing factor 2                   | 190.309  | 24.89 | 25476  | 5  | 54513.89646 | 44491.09063 | 38182.92963 | 51302.89237   | 43549.61599 | 45548.54612 | 47928.92281 | 40913.44008 | 35288.4983  | 54432.36771 | 45839.3171  | 47314.34734 | 39891.512   | 50805.13489 | 30918.56548 |
| Q62159 | Rhoc    | Rho-related GTP-binding protein RhoC                     | 544.859  | 65.8  | 22006  | 11 | 995975.3258 | 1003862.837 | 791622.2005 | 925992.0366   | 931960.8572 | 823927.2936 | 751904.0334 | 657663.2222 | 834003.3024 | 656075.4831 | 705463.0701 | 744487.0671 | 741883.2283 | 809267.8035 | 845635.2023 |
| Q62167 | Ddx3x   | ATP-dependent RNA helicase DDX3X                         | 692.773  | 30.21 | 73101  | 16 | 241452.2625 | 233008.653  | 272357.9973 | 289532.0262   | 255869.6551 | 250992.3424 | 251106.727  | 264955.5029 | 292100.9311 | 274388.6175 | 241225.0111 | 258735.6474 | 244843.4938 | 268267.4184 | 228284.9324 |
| Q62188 | Dpysl3  | Dihydropyrimidinase-related protein 3                    | 260.334  | 8.95  | 61936  | 6  | 251059.7172 | 247082.354  | 226037.8902 | 216506.5081   | 261508.2935 | 166790.6192 | 187431.808  | 194485.325  | 179221.2899 | 191924.5658 | 229550.797  | 225627.3641 | 230858.9559 | 226327.8525 | 227989.9921 |
| Q62189 | Snrpa   | U1 small nuclear ribonucleoprotein A                     | 144.668  | 16.72 | 31835  | 5  | 125283.3853 | 87220.50141 | 138008.9778 | 130971.3663   | 130021.928  | 132334.4497 | 126491.6438 | 142332.2134 | 127836.1433 | 139219.6498 | 98877.46924 | 99402.72341 | 147895.24   | 139187.2102 | 136487.6212 |
| Q62192 | Cd180   | CD180 antigen                                            | 558.941  | 25.11 | 74302  | 13 | 98727.69716 | 88824.73177 | 71470.99537 | 106245.3189   | 101675.0823 | 87278.80278 | 82617.10784 | 101671.5225 | 97297.46131 | 68863.20237 | 85931.16429 | 97823.95184 | 90473.99757 | 91917.39876 | 104910.6668 |
| Q62193 | Rpa2    | Replication protein A 32 kDa subunit                     | 79.469   | 13.7  | 29718  | 2  | 39285.432   | 34457.33798 | 37094.03219 | 40613.69595   | 37482.4466  | 25509.57828 | 27061.69333 | 27655.17448 | 27415.79413 | 25298.40994 | 23859.12043 | 27450.20789 | 21595.17997 | 24904.8401  | 26136.56236 |
| Q62261 | Sptbn1  | Spectrin beta chain, non-erythrocytic 1                  | 232.782  | 5.46  | 274223 | 9  | 41375.05279 | 38517.85987 | 32999.27095 | 38181.67288   | 38170.35618 | 31028.50265 | 31269.79399 | 25389.27471 | 32683.42582 | 34238.648   | 38056.12685 | 34064.15102 | 33564.61233 | 30688.03717 | 37221.71864 |
| Q62318 | Trim28  | Transcription intermediary factor 1-beta                 | 935.768  | 42.21 | 88847  | 22 | 493681.2792 | 477324.199  | 517981.1726 | 533081.7436   | 503062.5638 | 437681.6222 | 469734.8803 | 449895.7609 | 441294.7266 | 460561.5665 | 496660.1221 | 501866.0899 | 487467.7924 | 505862.055  | 458736.7978 |
| Q62348 | Tsn     | Translin                                                 | 405.978  | 41.67 | 26201  | 9  | 102633.0018 | 119307.6951 | 105941.403  | 99471.58759   | 96941.59686 | 96429.66545 | 103809.8678 | 106827.3542 | 95963.28018 | 90748.84166 | 92799.05088 | 85756.95339 | 100526.9823 | 106186.1925 | 114972.8381 |
| Q62376 | Snrnp70 | U1 small nuclear ribonucleoprotein 70 kDa                | 266.861  | 19.42 | 51992  | 7  | 89990.88482 | 93363.89787 | 45126.0847  | 85021.38577   | 79577.44086 | 69445.2299  | 69783.78943 | 74105.32134 | 93569.36186 | 69646.52869 | 102533.441  | 82397.55333 | 77881.53292 | 80197.14526 | 68729.18056 |
| Q62383 | Supt6h  | Transcription elongation factor SPT6                     | 29.284   | 1.45  | 199086 | 2  | 6935.366246 | 7240.205749 | 9182.949287 | 8537.937521   | 6686.511603 | 7030.66185  | 7458.558619 | 6990.147734 | 7192.593759 | 8306.318705 | 7453.957872 | 6382.936297 | 6804.643172 | 7321.883566 | 7018.120953 |
| Q62393 | Tpd52   | Tumor protein D52                                        | 285.218  | 43.3  | 24313  | 7  | 278521.2811 | 220706.7926 | 235593.0368 | 206765.7139</ |             |             |             |             |             |             |             |             |             |             |             |

|        |           |                                                                                |         |       |        |    |             |             |             |             |             |             |             |             |             |             |             |             |             |             |             |             |
|--------|-----------|--------------------------------------------------------------------------------|---------|-------|--------|----|-------------|-------------|-------------|-------------|-------------|-------------|-------------|-------------|-------------|-------------|-------------|-------------|-------------|-------------|-------------|-------------|
| Q63009 | Prmt1     | Protein arginine N-methyltransferase 1                                         | 314.173 | 31.44 | 40522  | 9  | 71627.79584 | 78610.434   | 74711.71372 | 84249.05962 | 84772.52494 | 70146.54985 | 86731.59471 | 88115.38056 | 83861.883   | 61181.53658 | 68124.3303  | 67724.96861 | 78556.6341  | 81365.32472 | 77937.39455 |             |
| Q63016 | Slc7a5    | Large neutral amino acids transporter small subunit 1                          | 59.457  | 5.86  | 55903  | 2  | 20854.17755 | 21500.40537 | 19315.68608 | 22876.83196 | 19904.7256  | 19639.83399 | 23974.23214 | 21599.44419 | 23270.27107 | 20571.35533 | 24493.46807 | 23139.36228 | 19832.87366 | 20545.59284 | 23312.4397  |             |
| Q63060 | Gk        | Glycerol kinase                                                                | 23.058  | 3.82  | 57477  | 2  | 6728.615817 | 5371.332878 | 6321.485211 | 5442.571965 | 4638.022012 | 9941.046246 | 8331.49232  | 7615.499106 | 9541.515057 | 6588.192351 | 5095.873772 | 5901.478686 | 5675.382469 | 6932.859211 | 5439.405224 |             |
| Q63065 | Pdk1      | [Pyruvate dehydrogenase (acetyl-transferring)] kinase isozyme 1, mitochondrial | 95.595  | 8.99  | 49081  | 2  | 10649.61835 | 9585.664402 | 8232.235088 | 8248.498637 | 7666.115573 | 4158.382634 | 8023.813108 | 8180.736427 | 7322.89043  | 8150.63982  | 7724.684731 | 9671.629973 | 2469.488501 | 6668.46232  | 8714.327744 |             |
| Q63413 | Ddx39b    | Spliceosome RNA helicase Ddx39b                                                | 694.132 | 65.65 | 49035  | 21 | 696227.2779 | 756146.7755 | 739869.1536 | 773748.7081 | 764758.6658 | 721478.0639 | 725018.4911 | 760274.1429 | 718099.117  | 721519.7992 | 694477.1951 | 778614.7337 | 749637.9952 | 811559.2637 | 772628.4958 |             |
| Q63450 | Camk1     | Calcium/calmodulin-dependent protein kinase type 1                             | 124.792 | 9.89  | 41638  | 3  | 28301.8594  | 35319.35884 | 32375.20639 | 34228.59476 | 31081.24558 | 27587.3974  | 32259.88538 | 26920.46456 | 30750.64277 | 34214.01897 | 31269.50191 | 35823.02195 | 33172.92997 | 34957.18443 | 35438.27652 |             |
| Q63486 | Rrag      | Ras-binding protein A                                                          | 293.389 | 29.39 | 36566  | 8  | 59846.37155 | 53215.5547  | 51729.68104 | 56236.7031  | 58168.15535 | 63568.46834 | 62588.4694  | 58900.89635 | 64699.84868 | 57938.47068 | 57831.00675 | 60274.92966 | 49323.69289 | 60180.94904 | 54134.57561 |             |
| Q63584 | Tmed10    | Transmembrane emp24 domain-containing protein 10                               | 373.401 | 35.16 | 24858  | 7  | 188908.0921 | 206503.6716 | 182630.3664 | 184568.8367 | 196630.2775 | 236979.6543 | 202671.0722 | 206906.4097 | 227937.7842 | 218246.1476 | 206611.4971 | 198816.2158 | 218110.9726 | 210004.9431 | 206951.0112 |             |
| Q63623 | Scaf8     | Protein SCAF8                                                                  | 53.926  | 1.5   | 139504 | 2  | 15230.00278 | 17942.84084 | 15293.64242 | 16166.03507 | 15541.51964 | 17444.34063 | 17169.08531 | 13756.43128 | 16031.41304 | 13742.01891 | 14873.13911 | 18627.15111 | 16790.79012 | 17650.60031 | 17850.50834 |             |
| Q63635 | Stx6      | Syntaxin-6                                                                     | 49.479  | 14.12 | 29057  | 2  | 4634.804196 | 2690.95495  | 10050.26265 | 12254.43097 | 11126.06641 | 10262.56032 | 10732.41003 | 9798.833222 | 11341.17622 | 9337.344462 | 8884.667828 | 11023.32951 | 10605.07823 | 11173.87802 | 11023.36157 |             |
| Q63799 | Tcea2     | Transcription elongation factor A protein 2                                    | 53.729  | 7.69  | 33528  | 2  | 7685.06509  | 7746.647041 | 7987.79217  | 6502.063713 | 7718.019796 | 6086.037908 | 5556.374973 | 5146.444116 | 5968.73849  | 5293.313672 | 6585.29142  | 6419.584417 | 5870.739226 | 6804.142495 | 7197.578288 |             |
| Q63862 | Myh11     | Myosin-11                                                                      | 645.565 | 10.78 | 152492 | 15 | 688474.6479 | 682263.3656 | 609168.3476 | 639019.4728 | 545255.8722 | 589882.9339 | 595148.8975 | 587855.7152 | 575558.1201 | 603917.7871 | 623061.0901 | 622299.61   | 651093.5624 | 645223.6117 | 639132.9111 |             |
| Q63921 | Ptgs1     | Prostaglandin G/H synthase 1                                                   | 208.36  | 22.43 | 69032  | 9  | 263099.6006 | 274859.9993 | 236614.5161 | 260442.1842 | 276725.5249 | 225541.7176 | 183410.5398 | 162947.1113 | 199945.4826 | 233370.5671 | 240157.6212 | 229092.1261 | 249878.5272 | 253413.9675 | 242860.3603 |             |
| Q63945 | Set       | Protein SET                                                                    | 264.432 | 39.79 | 33406  | 8  | 248645.0081 | 257444.7239 | 246451.7269 | 254163.2798 | 251661.9031 | 195697.7033 | 236385.3208 | 237693.1353 | 225784.8871 | 206978.3217 | 249730.5929 | 258510.1241 | 237863.5286 | 232753.2083 | 250260.1428 |             |
| Q64010 | Crk       | Adaptor molecule crk                                                           | 160.26  | 28.29 | 33815  | 6  | 45661.71387 | 37763.71309 | 39305.07373 | 27017.40183 | 32563.13224 | 28287.46693 | 36554.19073 | 28270.41485 | 31515.17981 | 27368.91645 | 43068.16999 | 30235.49952 | 43703.14024 | 20322.25774 | 38960.15511 |             |
| Q64012 | Raly      | RNA-binding protein Raly                                                       | 231.157 | 32.05 | 33188  | 10 | 253990.5137 | 256020.8118 | 265231.1511 | 254973.7486 | 271011.568  | 239767.7772 | 224569.387  | 206862.381  | 233665.3096 | 226204.3598 | 253711.5436 | 227017.6924 | 252606.4436 | 265403.7361 | 248405.9228 |             |
| Q640N3 | Arrgap30  | Rho GTPase-activating protein 30                                               | 48.964  | 5.18  | 120114 | 3  | 11317.62351 | 12307.44209 | 13121.87921 | 12628.7874  | 11712.91326 | 7789.038741 | 9942.090843 | 8816.06001  | 9077.034196 | 8336.601351 | 9761.987199 | 9067.679335 | 10209.34164 | 9831.500967 | 11899.71907 |             |
| Q64105 | Spr       | Sepiapterin reductase                                                          | 408.648 | 41.76 | 27883  | 8  | 162605.2404 | 146218.2262 | 155962.5228 | 157389.0789 | 132829.2782 | 134055.8165 | 143211.7    | 123104.5213 | 123884.3321 | 124676.5099 | 159719.499  | 135106.9607 | 149801.367  | 139574.4851 | 145522.1738 |             |
| Q64152 | Btf3      | Transcription factor BTF3                                                      | 173.982 | 33.82 | 22031  | 3  | 36421.8241  | 38136.17341 | 39040.43175 | 33368.65477 | 28589.15937 | 30859.04129 | 39926.47256 | 37716.0329  | 36795.51083 | 35631.28353 | 35990.32898 | 40692.74864 | 35074.77181 | 34215.91142 | 32769.44355 |             |
| Q641W4 | Rfc2      | Replication factor C subunit 2                                                 | 89.044  | 8.6   | 38657  | 2  | 6150.815504 | 4901.591082 | 8071.843198 | 7782.7086   | 7336.150254 | 7684.373995 | 7741.894357 | 8360.701077 | 8132.133761 | 8933.609597 | 5348.080265 | 5720.919666 | 1028.887204 | 7168.202729 | 7854.148351 |             |
| Q641Z4 | Cdk9      | Cyclin-dependent kinase 9                                                      | 44.543  | 5.38  | 42762  | 2  | 4836.018302 | 0.007562416 | 4389.680424 | 0.009171104 | 0.008265859 | 4221.658024 | 3949.897889 | 0.01388636  | 4501.78475  | 3698.937249 | 0.008046421 | 4380.844726 | 3723.534971 | 0.009465344 | 4459.947597 |             |
| Q641Z6 | Ehd1      | EH domain-containing protein 1                                                 | 626.153 | 65.73 | 60603  | 27 | 356666.439  | 384572.8039 | 341315.512  | 351856.6638 | 341470.3448 | 116877.0012 | 3963.322    | 9324        | 446525.7012 | 415517.4307 | 416172.2568 | 367587.2919 | 366422.6466 | 388908.1713 | 397405.8587 | 377626.2569 |
| Q64213 | Sf1       | Splicing factor 1                                                              | 165.52  | 11.64 | 70403  | 6  | 29665.71793 | 32914.99464 | 25388.99754 | 32936.58573 | 33227.96767 | 31124.85063 | 37700.48414 | 35436.79875 | 19771.77259 | 33437.7984  | 41452.54121 | 40274.52524 | 42994.72174 | 29071.09293 | 36333.70661 |             |
| Q64232 | Tecr      | Very-long-chain enoyl-CoA reductase                                            | 127.618 | 13.96 | 36123  | 6  | 78218.76039 | 88605.20241 | 83298.80305 | 78444.06052 | 87981.43057 | 104653.2742 | 105787.8834 | 104658.7978 | 117978.8909 | 97728.05349 | 82387.99528 | 84532.28052 | 91290.51811 | 95491.91405 | 94169.51516 |             |
| Q64261 | Cdk6      | Cyclin-dependent kinase 6                                                      | 117.992 | 20.25 | 37028  | 5  | 31105.36363 | 19578.09035 | 29928.91088 | 24506.91987 | 18398.3658  | 13938.58875 | 17333.74758 | 27937.38523 | 18361.66098 | 28546.60246 | 32959.57214 | 30947.71378 | 21284.75179 | 28659.66675 | 14944.64329 |             |
| Q642C0 | Dnajc8    | DnaJ homolog subfamily C member 8                                              | 90.595  | 27.67 | 29813  | 4  | 39552.89073 | 38291.37308 | 32628.03468 | 38360.82122 | 38606.62821 | 29574.46455 | 33114.91533 | 30638.2839  | 32610.8681  | 32214.10946 | 36249.09383 | 37527.14235 | 38263.63183 | 37272.42733 | 31840.01835 |             |
| Q64310 | Surf4     | Surfactant protein 4                                                           | 211.051 | 17.47 | 30381  | 3  | 24714.39158 | 21453.11759 | 13557.05779 | 20079.84253 | 16822.68644 | 20245.70561 | 18109.27806 | 25297.72368 | 25186.9953  | 21424.66982 | 18287.57947 | 14802.77459 | 18724.27189 | 19010.11497 | 18440.47709 |             |
| Q64324 | Stxbp2    | Syntaxin-binding protein 2                                                     | 691.24  | 39.8  | 66357  | 14 | 92792.34686 | 97136.28038 | 84808.96844 | 90742.77877 | 78115.14429 | 62487.60146 | 83848.899   | 82458.11935 | 81647.81381 | 74028.8502  | 82316.70399 | 82126.01063 | 75676.99616 | 82724.03996 | 79202.60345 |             |
| Q64337 | Sqstm1    | Sequestosome-1                                                                 | 89.348  | 10.41 | 48163  | 3  | 5742.817529 | 3190.638732 | 3388.620151 | 3827.488156 | 2423.206559 | 7753.686964 | 2213.587467 | 2311.426202 | 10244.96531 | 8206.58547  | 4584.641405 | 4700.193058 | 3897.939665 | 3887.601686 | 4134.078201 |             |
| Q64378 | Fkbp5     | Peptidyl-prolyl cis-trans isomerase FKBP5                                      | 145.766 | 17.11 | 50966  | 6  | 75631.62729 | 70738.14832 | 77010.20371 | 78313.75979 | 89361.10988 | 95330.07858 | 89037.40675 | 93830.08964 | 88277.18882 | 96701.14034 | 73044.81322 | 77768.71085 | 83317.65918 | 74613.77247 | 76638.73186 |             |
| Q64430 | Atp7a     | Copper-transporting ATPase 1                                                   | 60.924  | 2.88  | 161959 | 3  | 7847.000501 | 9103.853444 | 6722.947763 | 8462.21745  | 9339.741766 | 11909.06989 | 10081.85456 | 10439.8684  | 10677.47426 | 9967.13289  | 8344.129913 | 9226.269064 | 9266.825571 | 11146.22768 | 8409.601368 |             |
| Q64433 | Hspe1     | 10 kDa heat shock protein, mitochondrial                                       | 142.008 | 52.94 | 10963  | 6  | 166287.7265 | 145896.7479 | 151341.1879 | 131598.6148 | 118312.1899 | 200074.939  | 160701.7453 | 142736.4037 | 149559.4871 | 137140.635  | 169317.2054 | 143354.0116 | 131412.3081 | 129106.4868 | 127529.3419 |             |
| Q64511 | Top2b     | DNA topoisomerase 2-beta                                                       | 299.406 | 7.38  | 181909 | 10 | 102697.5127 | 115526.5553 | 114637.281  | 109581.8673 | 118834.9641 | 110370.3234 | 107750.5128 | 110835.4019 | 109756.412  | 104965.4039 | 100611.4086 | 110820.1696 | 121098.443  | 123427.5961 | 108883.2131 |             |
| Q64514 | Tpp2      | Tripeptidyl-peptidase 2                                                        | 740.218 | 25.91 | 139879 | 24 | 322756.5567 | 347724.5401 | 341243.9214 | 336484.0965 | 358331.6059 | 306846.4294 | 320568.1534 | 305625.5672 | 300229.4255 | 301009.3041 | 319326.8872 | 320580.9934 | 317114.8233 | 313950.532  | 319465.0737 |             |
| Q64518 | Atp2a3    | Sarcoplasmic/endoplasmic reticulum calcium ATPase 3                            | 552.793 | 17.44 | 113638 | 15 | 131242.4439 | 112715.0534 | 122867.525  | 128450.8994 | 146688.1866 | 168283.4349 | 138342.8448 | 144526.7174 | 165068.4901 | 129695.916  | 116732.3645 | 120504.2606 | 127832.5396 | 143759.8043 | 118181.7388 |             |
| Q64521 | Gpd2      | Glycerol-3-phosphate dehydrogenase, mitochondrial                              | 442.911 | 29.99 | 80954  | 16 | 134293.1392 | 116542.2331 | 110080.5185 | 136704.5075 | 102245.3439 | 86808.22217 | 116427.3534 | 92013.72604 | 98204.01137 | 110673.377  | 132626.0815 | 100878.814  | 131390.6539 | 142057.1809 | 115372.17   |             |
| Q64522 | Hist2h2ab | Histone H2A type 2-B                                                           | 380.051 | 57.69 | 14013  | 7  | 9283696.099 | 8303301.101 | 9099625.245 | 8061387.194 | 9204061.708 | 10390782.76 | 9578281.041 | 9581384.566 | 9368670.182 | 10082234.05 | 8795115.492 | 8365718.222 | 9226611.562 | 8708137.685 | 9691603.188 |             |
| Q64559 | Aco17     | Cytosolic acyl coenzyme A thioester hydrolase                                  | 85.904  | 5.77  | 42735  | 2  | 33934.89393 | 30539.40165 | 31983.58799 | 28592.38985 | 26293.33358 | 27429.78234 | 36593.31378 | 39618.95017 | 39546.62947 | 33071.99277 | 30909.81482 | 33174.93496 | 31661.09638 | 29432.86884 | 28691.941   |             |
| Q64578 | Atp2a1    | Sarcoplasmic/endoplasmic reticulum calcium ATPase 1                            | 254.77  | 9.76  | 109409 | 6  | 44702.04605 | 42300.22856 | 48502.60467 | 43868.91499 | 43248.17664 | 50782.5613  | 50868.29184 | 52942.87742 | 56744.66633 | 45355.30303 | 40699.51691 | 41603.49131 | 41074.67694 | 46479.55457 | 43612.13241 |             |
| Q64620 | Ppp6c     | Serine/threonine-protein phosphatase 6 catalytic subunit                       | 117.876 | 19.02 | 35159  | 5  | 35071.28195 |             |             |             |             |             |             |             |             |             |             |             |             |             |             |             |

|        |         |                                                            |          |       |        |    |             |             |             |             |             |             |             |             |             |             |             |             |             |              |             |
|--------|---------|------------------------------------------------------------|----------|-------|--------|----|-------------|-------------|-------------|-------------|-------------|-------------|-------------|-------------|-------------|-------------|-------------|-------------|-------------|--------------|-------------|
| Q69ZN7 | Myof    | Myoferlin                                                  | 429.761  | 10.11 | 233324 | 17 | 116379.3315 | 118919.1987 | 104975.9181 | 105591.7402 | 107190.0386 | 106207.7315 | 113446.1724 | 116256.9005 | 112750.8686 | 110534.0612 | 130343.5452 | 121562.2052 | 123393.0109 | 113363.072   | 127315.3164 |
| Q69ZR2 | Hectd1  | E3 ubiquitin-protein ligase HECTD1                         | 75.525   | 2.41  | 290086 | 4  | 14073.97953 | 11489.89107 | 13601.31338 | 15416.74673 | 13961.38291 | 1508.5812   | 11202.22773 | 12244.52747 | 12894.7395  | 14596.97012 | 13660.93776 | 12019.52987 | 10540.59991 | 11870.42845  | 16095.79566 |
| Q6A009 | Ltn1    | E3 ubiquitin-protein ligase listerin                       | 124.786  | 3     | 198921 | 3  | 4073.234978 | 4835.284767 | 4521.018328 | 5049.276064 | 4289.771042 | 3957.638021 | 4685.60843  | 4752.253764 | 3203.206179 | 4638.292215 | 2845.762582 | 2389.471398 | 4276.355195 | 4549.293967  | 2677.186052 |
| Q6A028 | Swap70  | Switch-associated protein 70                               | 515.661  | 32.82 | 68996  | 15 | 195692.4824 | 203179.2639 | 189178.1729 | 200451.1522 | 239653.3294 | 181318.9031 | 197511.2129 | 200468.4018 | 181099.3261 | 182041.5066 | 173983.5502 | 193678.8863 | 178198.3264 | 186725.1372  | 191339.2516 |
| Q6A065 | Cep170  | Centrosomal protein of 170 kDa                             | 93.838   | 2.96  | 175050 | 4  | 63088.64177 | 76492.03499 | 56784.02624 | 77747.55419 | 89207.74513 | 79565.96989 | 70153.30517 | 62923.372   | 79642.37638 | 81996.51314 | 73566.81673 | 71949.55837 | 77619.54384 | 87712.14563  | 86614.96353 |
| Q6A0A9 | FAM120A | Constitutive coactivator of PPAR-gamma-like protein 1      | 181.776  | 5.85  | 121646 | 4  | 22661.25664 | 18112.77588 | 27174.1612  | 26411.80863 | 28409.01324 | 25597.36232 | 26466.07703 | 27906.62521 | 25628.17486 | 17593.44273 | 26758.57779 | 25840.90915 | 26717.15628 | 26696.52095  | 26708.36529 |
| Q6A0D4 | Rftn1   | Raftlin                                                    | 82.367   | 11.91 | 61537  | 4  | 13083.27066 | 11771.33866 | 11162.65077 | 11826.01204 | 11105.17942 | 9049.506602 | 8823.247147 | 9092.298721 | 9228.745649 | 9352.770904 | 10645.84932 | 8707.397986 | 12705.65729 | 8749.945742  | 10628.85048 |
| Q6AXS3 | Dek     | Protein DEK                                                | 232.107  | 21.16 | 42892  | 7  | 58451.03289 | 60049.67952 | 55544.18026 | 56039.80867 | 64094.99939 | 41552.14412 | 45562.27601 | 22065.27427 | 46173.47301 | 43144.80469 | 68663.83477 | 61863.20219 | 54991.33343 | 43429.22783  | 61993.8219  |
| Q6AXS5 | Serbp1  | Plasminogen activator inhibitor 1 RNA-binding protein      | 383.707  | 37.59 | 44754  | 13 | 347869.979  | 344636.0798 | 228350.588  | 248817.1317 | 413920.7637 | 382447.0761 | 302743.378  | 396978.1497 | 301309.1002 | 207455.7572 | 370665.08   | 338348.8216 | 417871.75   | 247830.2448  | 282291.6709 |
| Q6AXT7 | Rbm42   | RNA-binding protein 42                                     | 56.837   | 5.7   | 49905  | 2  | 6824.992477 | 5997.441382 | 7719.1768   | 7547.28582  | 5038.796315 | 6990.208057 | 5508.561681 | 7932.526499 | 6719.025405 | 6853.651156 | 7748.255192 | 6584.510173 | 6750.244626 | 7447.837897  | 6855.211845 |
| Q6AXY7 | Prpf38b | Pre-mRNA-splicing factor 38B                               | 55.077   | 3.32  | 63932  | 2  | 4497.297423 | 10133.29863 | 4346.090243 | 4583.147843 | 4458.10993  | 3104.011559 | 3164.276236 | 4204.082292 | 4183.648023 | 3618.641497 | 7623.090621 | 7858.499867 | 8748.179371 | 5026.748998  | 4210.387539 |
| Q6AY23 | Pycr2   | Pyroline-5-carboxylate reductase 2                         | 364.091  | 41.56 | 33673  | 9  | 105655.6289 | 97587.23479 | 98042.50359 | 82914.90248 | 96902.04472 | 116737.476  | 104371.8592 | 97990.70679 | 118560.6697 | 102216.8499 | 100922.5878 | 92049.96741 | 100348.5487 | 100860.3537  | 98036.75824 |
| Q6AYE2 | Sh3glb1 | Endophilin-B1                                              | 166.687  | 16.16 | 40787  | 5  | 76146.5712  | 61159.53965 | 56685.28477 | 63403.17315 | 54829.95102 | 50822.44034 | 48558.09918 | 44518.67576 | 51390.07656 | 54367.70486 | 63263.05295 | 52227.41253 | 60507.06111 | 58592.17051  | 60739.51216 |
| Q6AYH5 | Dctn2   | Dynactin subunit 2                                         | 233.446  | 21.14 | 44148  | 7  | 92783.45419 | 87529.93277 | 85457.20245 | 87510.21236 | 86160.62716 | 104773.104  | 83014.71018 | 81203.06323 | 96844.70284 | 77871.03147 | 91258.82829 | 81970.40863 | 91797.6792  | 89282.10604  | 88451.77734 |
| Q6AYK3 | Isyna1  | Inositol-3-phosphate synthase 1                            | 209.782  | 17.59 | 60884  | 7  | 76605.23053 | 80361.34499 | 74439.91552 | 74765.23051 | 71491.85204 | 66019.35359 | 73558.8044  | 72137.10346 | 68585.62424 | 65717.68628 | 73062.03256 | 81632.15996 | 69254.69226 | 70574.18968  | 67850.41002 |
| Q6AYL5 | Sf3b4   | Splicing factor 3B subunit 4                               | 206.282  | 18.4  | 44356  | 4  | 22973.13346 | 24121.6313  | 18370.02108 | 24107.73392 | 18362.86394 | 19941.65115 | 19537.90544 | 20987.36818 | 19708.62632 | 16660.94806 | 23403.29874 | 25243.7027  | 21174.23332 | 19526.19471  | 18095.41823 |
| Q6AYP5 | Cadm1   | Cell adhesion molecule 1                                   | 48.06    | 8.19  | 51854  | 2  | 3549.034881 | 10114.78772 | 7361.784592 | 10201.17449 | 9997.110029 | 9621.695909 | 10131.98474 | 10940.82049 | 9852.637317 | 9382.120271 | 4512.319691 | 9477.900729 | 9135.7519   | 8174.069412  | 9732.238679 |
| Q6AYT3 | Rtcb    | tRNA-splicing ligase Rtcb homolog                          | 185.449  | 21.58 | 55249  | 6  | 56855.41175 | 60818.63729 | 51469.5848  | 51679.92562 | 54735.25734 | 54802.30695 | 51171.96861 | 53302.06894 | 46233.29182 | 51538.57375 | 53901.77851 | 60200.30772 | 57912.79327 | 50675.659179 | 50597.22231 |
| Q6AYY8 | Slc33a1 | Acetyl-coenzyme A transporter 1                            | 93.788   | 7.82  | 61101  | 3  | 1672.888262 | 1466.834169 | 9345.181918 | 1784.993407 | 1149.478489 | 4712.934219 | 11675.03617 | 9576.40582  | 1738.336641 | 6975.672393 | 1505.987884 | 8556.165477 | 5975.89617  | 9526.659311  | 6984.098018 |
| Q6BBH8 | Ufc1    | Ubiquitin-fold modifier-conjugating enzyme 1               | 74.507   | 20.36 | 19492  | 2  | 14542.4138  | 14332.43015 | 12378.49491 | 12040.43588 | 13741.56686 | 11923.69511 | 13892.85144 | 11649.11162 | 12252.62077 | 11122.92051 | 12702.13027 | 13067.43304 | 14506.00559 | 13809.0088   | 13532.45763 |
| Q6DFV1 | Ncapg2  | Condensin-2 complex subunit G2                             | 52.338   | 2.02  | 130894 | 2  | 5612.2646   | 2618.472485 | 5364.683523 | 7498.821673 | 6244.437968 | 4141.12571  | 5540.971795 | 5221.210844 | 6162.686873 | 6396.690888 | 6290.310114 | 6976.722583 | 6315.77088  | 6251.969095  | 6624.614198 |
| Q6DFW4 | Nop58   | Nucleolar protein 58                                       | 431.638  | 23.51 | 60343  | 9  | 114975.9023 | 107995.206  | 104111.2384 | 106375.0533 | 115293.4321 | 91931.93844 | 95285.41976 | 91936.747   | 99588.81584 | 87888.21829 | 96747.37243 | 106371.6098 | 94762.37872 | 102169.1595  | 97611.59782 |
| Q6DIC0 | Smarca2 | Probable global transcription activator SNF2L2             | 202.857  | 5.2   | 180253 | 6  | 26216.75281 | 29902.81073 | 44002.81605 | 44629.08026 | 24977.1092  | 46042.01964 | 26297.96799 | 42433.70483 | 47425.04908 | 24949.42271 | 28101.29007 | 47523.63565 | 29096.71955 | 30098.57151  | 29821.12281 |
| Q6DVA0 | Lem2    | LEM domain-containing protein 2                            | 35.137   | 4.5   | 57507  | 2  | 4802.982902 | 4834.416488 | 3814.431461 | 3404.114474 | 6236.116852 | 6978.263612 | 6270.817181 | 6918.967158 | 5367.613373 | 6246.541212 | 6182.947766 | 4279.587359 | 5729.85524  | 5480.635568  | 5970.536542 |
| Q6GQT9 | Nomo1   | Nodal modulator 1                                          | 253.918  | 11.2  | 133420 | 9  | 59972.09874 | 53196.51632 | 48823.07938 | 52068.39881 | 53608.09175 | 80056.01929 | 73493.75264 | 77073.95423 | 76007.26464 | 70330.52694 | 48317.09574 | 68065.5631  | 67338.69474 | 67950.32021  | 52651.4198  |
| Q6IMY8 | Hnrnpu  | Heterogeneous nuclear ribonucleoprotein U                  | 1237.314 | 46.87 | 87732  | 34 | 2193168.122 | 2242029.028 | 2325469.408 | 2462415.804 | 2240943.403 | 2007178.846 | 2165776.163 | 1981928.788 | 2056403.768 | 2054034.001 | 2022374.555 | 2184962.196 | 2026458.219 | 2160680.696  | 2141007.958 |
| Q6IRU2 | Tpm2    | Tropomyosin alpha-4 chain                                  | 577.614  | 50.81 | 28468  | 16 | 34145.1538  | 32559.1046  | 291346.2403 | 298261.5778 | 344361.7422 | 338753.4376 | 333006.1045 | 332059.7522 | 329319.4302 | 327443.7212 | 322151.889  | 333802.5623 | 346749.1419 | 310268.6964  | 332732.8097 |
| Q6KCD5 | Nipbl   | Nipped-B-like protein                                      | 110.161  | 1.29  | 315450 | 3  | 3989.631514 | 4156.853383 | 3541.303065 | 3832.596186 | 3570.96108  | 3774.613498 | 3607.274039 | 4267.170662 | 4214.888319 | 3517.247835 | 3905.285108 | 4095.564265 | 4096.210415 | 3704.688891  | 4073.526124 |
| Q6MG14 | Nrm     | Nurim                                                      | 51.085   | 14.5  | 29382  | 3  | 11954.96707 | 15436.43319 | 13885.59572 | 12087.34149 | 14432.12564 | 15177.14557 | 13862.42017 | 13995.90207 | 12927.00668 | 16570.44405 | 12984.69644 | 11697.90561 | 14819.19768 | 13681.19337  | 13153.45417 |
| Q6MGA9 | Brd2    | Bromodomain-containing protein 2                           | 38.5     | 4.51  | 88051  | 2  | 21559.06344 | 21241.53065 | 22108.36844 | 19241.53946 | 16449.74742 | 16495.0862  | 20975.73552 | 17668.41716 | 15423.70931 | 16356.77993 | 15710.32093 | 15008.41788 | 16644.55328 | 16421.52002  | 20385.77741 |
| Q6NS46 | Podcd11 | Protein RRP5 homolog                                       | 162.864  | 4.51  | 207779 | 7  | 23624.29726 | 23503.37167 | 25210.86014 | 25041.40042 | 21017.47967 | 25210.38374 | 26963.35626 | 25517.10736 | 26274.48245 | 26088.98968 | 24828.7584  | 25968.95774 | 23896.07728 | 26213.70862  |             |
| Q6NSR8 | Npepl1  | Probable aminopeptidase NPEPL1                             | 194.656  | 18.89 | 55940  | 7  | 93970.01257 | 91388.973   | 82082.29441 | 74551.59883 | 80957.40948 | 57416.25391 | 65232.66051 | 58984.96437 | 62680.92015 | 67530.67028 | 76591.55484 | 76358.7919  | 83513.1453  | 82616.02965  | 74408.40353 |
| Q6NV83 | U2surp  | U2 snRNP-associated SURP motif-containing protein          | 168.363  | 5.05  | 118261 | 4  | 12448.78061 | 13634.71695 | 13567.25361 | 14626.11162 | 13677.93524 | 13364.80639 | 14473.12013 | 13724.5826  | 11812.20778 | 14003.63238 | 13243.68659 | 13817.8685  | 9832.035665 | 12721.62904  | 11707.36664 |
| Q6NVF9 | Cpsf6   | Cleavage and polyadenylation specificity factor subunit 6  | 174.093  | 9.98  | 59153  | 3  | 36444.11747 | 37307.97167 | 36907.37628 | 46516.64471 | 38554.68555 | 41836.67345 | 55927.97414 | 48521.0752  | 45796.55291 | 38730.48143 | 38431.52054 | 49391.22645 | 45155.30749 | 48570.05338  | 45384.08483 |
| Q6NWW9 | Fndc3b  | Fibronectin type III domain-containing protein 3B          | 80.396   | 3.31  | 132764 | 3  | 1829.547261 | 2029.734906 | 1351.132222 | 1751.092698 | 1488.20318  | 1064.874263 | 1589.332462 | 1618.890331 | 1481.548901 | 1063.205864 | 1341.58301  | 1295.948912 | 1336.376455 | 1171.661896  | 1205.386093 |
| Q6NZJ6 | Eif4g1  | Eukaryotic translation initiation factor 4 gamma 1         | 725.573  | 13.88 | 176077 | 16 | 173169.8128 | 172092.4114 | 146391.0856 | 182152.5077 | 146214.9027 | 138768.3255 | 173409.3995 | 181065.8804 | 137354.7468 | 139868.8358 | 146485.2126 | 179328.904  | 158148.6461 | 129628.6664  | 147007.9405 |
| Q6P1B1 | Xpnpep1 | Xaa-Pro aminopeptidase 1                                   | 246.517  | 25.2  | 69591  | 12 | 176433.2494 | 205061.6853 | 204064.2369 | 197525.24   | 195769.8678 | 186323.6184 | 200786.7445 | 212414.5731 | 221046.0728 | 173488.0418 | 198499.514  | 212895.2984 | 206383.277  | 188475.8839  | 187658.5892 |
| Q6P2B1 | Tnpo3   | Transportin-3                                              | 168.112  | 9.97  | 104170 | 5  | 20770.40673 | 17871.09998 | 19682.39801 | 21926.30897 | 18533.03938 | 15669.18198 | 21083.47287 | 20831.12233 | 17469.58984 | 16947.40368 | 18765.46647 | 11983.62697 | 16022.54261 | 19784.10455  | 21214.87493 |
| Q6P3A8 | Bckdhb  | 2-oxoisovalerate dehydrogenase subunit beta, mitochondrial | 28.169   | 9.49  | 42880  | 2  | 30313.85445 | 27061.00238 | 31866.53517 | 23046.35064 | 18503.52819 | 14706.5382  | 18248.39134 | 12306.96839 | 12666.6686  | 15730.15172 | 27707.04562 | 20851.94496 | 18736.12429 | 21393.28986  | 17928.00296 |
| Q6P3D0 | Nudt16  | U8 snoRNA-decapping enzyme                                 | 43.214   | 20    | 21825  | 3  | 18655.58455 | 16991.77443 | 16108.00281 | 17222.03034 | 16153.1436  | 16561.06963 | 14011.94167 | 134         |             |             |             |             |             |              |             |

|        |          |                                                                                                        |         |       |        |    |              |             |              |             |             |             |             |             |             |             |             |             |             |             |             |
|--------|----------|--------------------------------------------------------------------------------------------------------|---------|-------|--------|----|--------------|-------------|--------------|-------------|-------------|-------------|-------------|-------------|-------------|-------------|-------------|-------------|-------------|-------------|-------------|
| Q6P9Q6 | Fkbp15   | FK506-binding protein 15                                                                               | 99.335  | 3.54  | 132961 | 3  | 12330.48488  | 22438.3907  | 10013.93239  | 13221.81733 | 10295.07771 | 9656.802255 | 12437.74504 | 10569.4741  | 7956.167144 | 9105.408373 | 11125.64734 | 10628.23244 | 19113.1837  | 20518.15291 | 21668.43325 |
| Q6P9R2 | Oxsr1    | Serine/threonine-protein kinase OSR1                                                                   | 280.913 | 19.17 | 58214  | 7  | 55695.80285  | 66160.63322 | 61232.91304  | 62006.9414  | 59326.25178 | 61988.84272 | 59867.27321 | 63975.00683 | 56872.93753 | 64016.82495 | 55445.10215 | 66061.64845 | 68979.21715 | 61115.67984 | 56190.76605 |
| Q6PAR5 | Gapvd1   | GTPase-activating protein and VPS9 domain-containing protein 1                                         | 56.369  | 2.13  | 162402 | 2  | 9152.436627  | 10834.97264 | 9050.971224  | 15467.51108 | 7321.49282  | 7573.611548 | 6955.607616 | 9477.903832 | 8250.858294 | 6462.350685 | 17586.9595  | 7076.743603 | 12885.28911 | 9008.443627 | 7260.486738 |
| Q6PB66 | Lrrprc   | Leucine-rich PPR motif-containing protein, mitochondrial Polypeptide N-acetylglucosaminyltransferase 2 | 863.426 | 30.24 | 156615 | 29 | 167511.4761  | 169214.5341 | 144651.7217  | 154503.3544 | 147717.3548 | 186800.1167 | 193815.574  | 192004.9434 | 189287.4037 | 166204.2572 | 169091.0688 | 177317.2908 | 172916.5905 | 150688.2184 | 173639.5779 |
| Q6PB93 | Galnt2   | Polypeptide N-acetylglucosaminyltransferase 2                                                          | 49.663  | 5.79  | 64514  | 3  | 21215.47615  | 22634.64673 | 29184.37231  | 23206.02872 | 12027.84352 | 37281.93589 | 25452.59763 | 31524.9592  | 29309.38472 | 27759.0897  | 21449.21738 | 20219.93864 | 25215.86524 | 23171.8193  | 21019.23918 |
| Q6PCN7 | Hltf     | Helicase-like transcription factor                                                                     | 55.908  | 2.69  | 113317 | 2  | 928.4854096  | 980.3645741 | 1045.014018  | 1045.079771 | 634.7313815 | 273.8505065 | 611.9870421 | 815.0806323 | 854.8782958 | 321.4818453 | 589.5176857 | 957.1825284 | 641.9062151 | 539.3847411 | 553.8524884 |
| Q6PCT3 | Tpd52l2  | Tumor protein D54                                                                                      | 38.425  | 9.55  | 23992  | 2  | 24071.38213  | 26805.63661 | 22668.24819  | 19600.4506  | 20878.83435 | 16806.60686 | 17634.737   | 15330.42809 | 17075.68955 | 18629.11058 | 18920.80463 | 16553.24387 | 20929.19621 | 20007.35927 | 20299.13713 |
| Q6PD03 | Ppp2r5a  | Serine/threonine-protein phosphatase 2A 56 kDa regulatory subunit alpha isoform                        | 92.167  | 8.64  | 56347  | 3  | 8401.411286  | 7958.838481 | 7919.195946  | 7654.356162 | 7353.833489 | 7932.649212 | 7353.620546 | 9883.281382 | 1738.532211 | 8415.374405 | 6916.545469 | 8115.161651 | 2999.511633 | 7480.118861 | 9658.620148 |
| Q6PDG5 | Smarcc2  | SWI/SNF complex subunit SMARCC2                                                                        | 128.747 | 5.94  | 132604 | 5  | 31836.36813  | 31442.99689 | 31836.20329  | 33770.42247 | 34127.5039  | 26551.90924 | 29208.97875 | 26447.16188 | 27701.7928  | 25411.35847 | 24173.23057 | 25638.57674 | 28284.94291 | 28797.41228 | 31725.04103 |
| Q6PDI5 | Ecpas    | Proteasome adapter and scaffold protein ECM29                                                          | 311.537 | 7.34  | 203703 | 9  | 20958.33324  | 25994.6942  | 30562.34033  | 28407.15648 | 26492.62344 | 20652.77093 | 21118.9948  | 30498.23649 | 29779.50399 | 23207.61513 | 24741.20932 | 25819.03158 | 25516.12198 | 19937.33744 | 25940.78934 |
| Q6PDL0 | Dync1l12 | Cytoplasmic dynein 1 light intermediate chain 2                                                        | 310.413 | 28.25 | 54218  | 8  | 48093.80935  | 50579.68983 | 46713.70836  | 47162.67101 | 44216.24924 | 43587.82509 | 52199.54997 | 47352.11798 | 46042.70056 | 51854.02242 | 46886.07599 | 40833.22971 | 46056.31072 | 50300.76684 | 46682.56102 |
| Q6PDM2 | Srsf1    | Serine/arginine-rich splicing factor 1                                                                 | 185.744 | 32.66 | 27745  | 7  | 179761.2134  | 161808.0252 | 167848.2649  | 159093.7302 | 161052.5163 | 157545.5168 | 130243.9499 | 114491.0346 | 145099.2311 | 114620.6879 | 157802.2139 | 159293.3804 | 166351.2434 | 156294.6458 | 145383.1578 |
| Q6PDQ2 | Chd4     | Chromodomain-helicase-DNA-binding protein 4                                                            | 322.991 | 9.19  | 217751 | 13 | 89914.71718  | 91831.26845 | 91039.55253  | 101372.739  | 90248.96232 | 80565.24668 | 97494.73466 | 85610.73261 | 85886.20072 | 89950.83592 | 104524.1819 | 97710.38411 | 83523.68295 | 86538.77464 | 95046.50371 |
| Q6PDV7 | Rpl10    | 60S ribosomal protein L10                                                                              | 382.021 | 42.99 | 24604  | 10 | 685493.1607  | 755627.6913 | 685608.4555  | 684804.2635 | 721631.117  | 699145.1065 | 655287.3987 | 720584.4834 | 679675.735  | 664037.0654 | 657630.1878 | 687684.458  | 624770.3219 | 669013.7953 | 625652.2271 |
| Q6PE01 | Snmp40   | US small nuclear ribonucleoprotein 40 kDa protein                                                      | 172.828 | 19.55 | 39276  | 4  | 32158.29754  | 34956.05661 | 37070.20747  | 35110.66922 | 34312.15699 | 29279.06308 | 30685.10609 | 32362.1817  | 30441.18119 | 27913.62052 | 29203.58134 | 35135.19182 | 32590.50171 | 31352.13226 | 31770.70457 |
| Q6PEC4 | Skp1     | S-phase kinase-associated protein 1                                                                    | 164.247 | 31.9  | 18672  | 4  | 38951.42222  | 36034.30206 | 31511.25892  | 28249.68175 | 33647.98283 | 36521.72611 | 31810.86399 | 35102.80056 | 34447.68187 | 35524.086   | 33668.99289 | 35054.82991 | 30137.52813 | 29425.87824 | 32404.5445  |
| Q6PFD9 | Nup98    | Nuclear pore complex protein Nup98-Nup96                                                               | 170.461 | 6     | 197241 | 7  | 28232.28517  | 30000.51525 | 26324.15289  | 27112.28836 | 26376.28974 | 28007.9611  | 36196.36591 | 31619.77873 | 23968.17427 | 31580.32831 | 27326.37951 | 26820.7421  | 28553.97672 | 24804.20101 | 27304.92986 |
| Q6PFQ7 | Rasa4    | Ras GTPase-activating protein 4                                                                        | 83.052  | 3.87  | 90060  | 3  | 11777.93222  | 10687.60479 | 12628.22772  | 10098.91897 | 13216.48024 | 14977.36923 | 14278.04203 | 11814.79067 | 15943.82359 | 13316.34237 | 10704.4172  | 7766.393673 | 12468.8472  | 12942.96649 | 12934.31193 |
| Q6PFR5 | Tra2a    | Transformer-2 protein homolog alpha                                                                    | 101.025 | 8.54  | 32316  | 2  | 11582.48272  | 9054.539877 | 11833.33533  | 10066.51173 | 8005.694664 | 11480.43842 | 10971.43166 | 10299.43912 | 10817.99118 | 8865.749905 | 9975.963658 | 11659.78402 | 11524.37249 | 10691.34701 | 10278.8439  |
| Q6PGB6 | Naa50    | N-alpha-acetyltransferase 50                                                                           | 85.827  | 21.3  | 19414  | 3  | 25593.18425  | 20010.13683 | 25055.266    | 20505.15246 | 20168.91899 | 19302.11443 | 26301.8485  | 23784.52187 | 21626.80056 | 19059.98865 | 27675.39905 | 17209.83245 | 19180.34281 | 23923.9269  | 21469.81629 |
| Q6PGH2 | Jpl2     | Jupiter microtubule associated homolog 2                                                               | 33.619  | 14.74 | 20020  | 2  | 19008.48611  | 17499.99901 | 19558.72866  | 18496.14654 | 19705.68372 | 8255.798072 | 8724.779674 | 17132.90185 | 16046.34509 | 18015.40627 | 16847.64832 | 17755.05647 | 18863.59279 | 17100.79844 | 16671.11995 |
| Q6PGL7 | Washc2   | WASH complex subunit 2                                                                                 | 178.8   | 4.87  | 145311 | 3  | 5737.121326  | 5348.734981 | 2372.307302  | 4788.296857 | 3616.937358 | 2155.099103 | 3350.909344 | 4241.560744 | 4016.920302 | 2642.116284 | 4499.035533 | 3999.514267 | 4756.096615 | 3240.798695 | 3214.488604 |
| Q6PHZ2 | Camk2d   | Calcium/calmodulin-dependent protein kinase type II subunit delta                                      | 420.693 | 32.67 | 56369  | 13 | 255914.4726  | 259301.9322 | 240789.503   | 267652.2307 | 252148.7787 | 194219.2674 | 216849.7384 | 197604.6735 | 255805.3369 | 285060.7779 | 265020.6915 | 309214.6206 | 326169.4689 | 261714.9505 | 251112.6808 |
| Q6PII5 | Nudcd1   | NudC domain-containing protein 1                                                                       | 65.206  | 7.04  | 66705  | 3  | 9296.169214  | 10682.64857 | 11047.38344  | 11883.17323 | 10284.08825 | 10820.28609 | 13235.32807 | 10848.53612 | 10757.97831 | 9809.6683   | 10047.13425 | 9293.863778 | 11030.55025 | 10938.83242 | 12919.94721 |
| Q6PIU9 |          | Uncharacterized protein FLJ45252 homolog                                                               | 67.619  | 8.47  | 37705  | 2  | 9576.675938  | 10142.28088 | 8593.863965  | 2952.406667 | 7528.955547 | 7688.642298 | 8575.508973 | 8737.990897 | 8424.512453 | 8297.968613 | 8469.368913 | 4590.262103 | 8984.759524 | 8136.160128 | 8326.771754 |
| Q6Q0N3 | Nt5dc2   | 5'-nucleotidase domain-containing protein 2                                                            | 130.949 | 10.49 | 63653  | 4  | 17428.09192  | 14813.517   | 13750.37064  | 16002.72981 | 12754.10772 | 8313.397487 | 11309.37779 | 10144.40396 | 11134.01785 | 11016.8835  | 14032.85742 | 13407.56654 | 14527.58741 | 12343.42628 | 12195.58314 |
| Q6Q899 | Ddx58    | Probable ATP-dependent RNA helicase DDX58                                                              | 113.886 | 6.59  | 105975 | 4  | 6910.118595  | 6678.684094 | 9886.749131  | 5284.084977 | 10449.53872 | 11209.31209 | 11924.24844 | 12360.48121 | 11950.74454 | 11485.79237 | 5214.682193 | 2598.368259 | 7740.32856  | 8280.410679 | 7627.290814 |
| Q6R5N8 | Tlr13    | Toll-like receptor 13                                                                                  | 196.681 | 11.81 | 114443 | 7  | 26636.5427   | 25065.47371 | 23841.31553  | 26142.74909 | 22283.79686 | 20798.71416 | 26010.20224 | 21750.27609 | 25243.24044 | 20963.32681 | 22311.152   | 24202.97168 | 23471.49942 | 25525.4053  | 24574.65703 |
| Q6RJR6 | Rtn3     | Reticulon-3                                                                                            | 37.993  | 2.02  | 101517 | 2  | 58146.14022  | 61069.09316 | 62737.66728  | 53943.40902 | 55520.04992 | 53257.93671 | 54127.00476 | 61754.52934 | 66446.54455 | 60087.70948 | 72439.19131 | 59759.82636 | 62212.09963 | 59504.2061  | 54577.15188 |
| Q6TEK4 | Vkorc1   | Vitamin K epoxide reductase complex subunit 1                                                          | 78.781  | 19.25 | 17783  | 2  | 9639.036701  | 7472.003697 | 7909.155851  | 9487.075672 | 8542.548233 | 8115.537207 | 8234.752089 | 8193.07536  | 7727.856865 | 6337.057677 | 5274.072343 | 6792.851469 | 6423.977365 | 7837.010007 | 6930.694577 |
| Q6TUG0 | Dnajb11  | DnaJ homolog subfamily B member 11                                                                     | 290.148 | 30.17 | 40495  | 7  | 41934.51763  | 50756.5407  | 48985.59436  | 44220.58096 | 47946.26355 | 64048.03454 | 54344.86889 | 56014.68595 | 64336.09644 | 58726.37971 | 53033.08691 | 53933.3421  | 52965.35779 | 52758.78156 | 54670.38527 |
| Q6UPE1 | Etfdh    | Electron transfer flavoprotein-ubiquinone oxidoreductase, mitochondrial                                | 221.252 | 16.88 | 68198  | 7  | 53084.83394  | 45906.35514 | 43276.19178  | 48449.60612 | 42632.15937 | 43067.20576 | 27966.21597 | 24866.25019 | 46612.89746 | 38524.00188 | 34722.81654 | 30445.31994 | 37334.36141 | 52343.17543 | 47125.42739 |
| Q6URK4 | Hnrnpa3  | Heterogeneous nuclear ribonucleoprotein A3                                                             | 923.97  | 41.42 | 39652  | 20 | 849642.9038  | 842987.6286 | 796204.1548  | 851745.2761 | 864088.3685 | 659012.8174 | 706485.3578 | 718629.7284 | 698403.3897 | 727671.7541 | 803190.2632 | 799371.2796 | 794421.3894 | 832896.624  | 758724.8995 |
| Q6URV6 | Mylb1    | Myosin-14                                                                                              | 274.465 | 4.45  | 228586 | 9  | 562380.7876  | 564578.3229 | 498433.0047  | 528397.6941 | 425968.5506 | 484064.0185 | 486022.814  | 479605.2661 | 475817.5913 | 485177.1121 | 504119.0899 | 488564.5281 | 502405.546  | 514059.945  | 529314.2767 |
| Q6VN19 | Ranbp10  | Ran-binding protein 10                                                                                 | 93.852  | 5.97  | 67188  | 3  | 16317.19526  | 17218.75088 | 20683.40479  | 14669.87269 | 16587.08053 | 18917.58763 | 17999.90762 | 17454.13327 | 16714.12742 | 17363.31652 | 20736.59617 | 18048.77449 | 19602.4362  | 16410.6736  | 16501.6857  |
| Q6WKZ8 | Ubr2     | E3 ubiquitin-protein ligase UBR2                                                                       | 80.05   | 1.82  | 199155 | 3  | 16616.118624 | 6823.490629 | 5230.802905  | 6080.393564 | 6242.304343 | 5185.508161 | 7020.31362  | 6871.494069 | 7823.827076 | 6512.733493 | 6326.503438 | 6480.191532 | 6935.257514 | 6564.387643 | 6471.926315 |
| Q6WVG3 | Kctd12   | BTB/POZ domain-containing protein KCTD12                                                               | 340.99  | 40.06 | 35892  | 8  | 113846.1879  | 109548.2842 | 97281.32029  | 106934.94   | 99049.50661 | 88811.82107 | 88697.60762 | 80090.2937  | 86039.9739  | 92854.20376 | 99507.19823 | 87916.31606 | 97712.07632 | 100246.5994 | 91856.78007 |
| Q6Y7W8 | Gigyf2   | GRB10-interacting GYF protein 2                                                                        | 104.926 | 3.64  | 149193 | 2  | 5127.440879  | 2940.476629 | 3407.126165  | 4104.117577 | 3104.970224 | 3671.791671 | 4440.874824 | 4535.34619  | 5220.424187 | 3230.549926 | 2943.322418 | 3419.442241 | 3485.710904 | 3145.733215 | 3659.86121  |
| Q6ZPE2 | Sbf1     | Myotubularin-related protein 5                                                                         | 109.768 | 3.64  | 208693 | 5  | 14631.83098  | 13687.27007 | 11451.805676 | 7446.246028 | 7301.130372 | 12210.33999 | 12028.17011 | 11476.71427 | 12025.86321 | 14698.01372 | 12723.46938 | 7653.734474 | 11450.65065 | 14600.19946 | 8343.867736 |
| Q6ZPF4 | Fmnl3    | Formin-like protein 3                                                                                  | 410.71  |       |        |    |              |             |              |             |             |             |             |             |             |             |             |             |             |             |             |

|        |          |                                                                                   |          |       |         |    |             |             |             |             |             |             |             |             |             |             |             |             |             |             |             |
|--------|----------|-----------------------------------------------------------------------------------|----------|-------|---------|----|-------------|-------------|-------------|-------------|-------------|-------------|-------------|-------------|-------------|-------------|-------------|-------------|-------------|-------------|-------------|
| Q6ZQ88 | Kdm1a    | Lysine-specific histone demethylase 1A                                            | 41.547   | 4.69  | 92851   | 2  | 8299.464369 | 7118.415388 | 6716.926599 | 7350.355812 | 7724.055111 | 5933.492657 | 8329.508846 | 14502.2204  | 7131.725208 | 5482.316668 | 7644.597698 | 7653.008769 | 9032.901268 | 8106.683536 | 8645.504118 |
| Q6ZQA0 | Nbeal2   | Neurobeachin-like protein 2                                                       | 119.261  | 1.5   | 301924  | 3  | 10257.61804 | 9512.856299 | 8616.926703 | 11264.97436 | 9024.439543 | 9033.099384 | 1113.597434 | 6902.362127 | 6180.336357 | 7817.41956  | 11669.7433  | 6506.709763 | 14216.78567 | 10995.00663 | 5395.464107 |
| Q6ZQI3 | Mlec     | Maleic                                                                            | 104.181  | 12.37 | 32342   | 3  | 32187.16992 | 32848.642   | 29432.20314 | 29286.58966 | 32145.57204 | 38557.60336 | 36821.17194 | 36264.87014 | 37518.40881 | 34839.71144 | 26590.50012 | 30023.19518 | 30755.66076 | 34318.97843 | 29840.36721 |
| Q6ZQK0 | Ncapd3   | Condensin-2 complex subunit D3                                                    | 73.851   | 2.32  | 169432  | 3  | 1076.041022 | 2571.700808 | 5372.662862 | 1036.056276 | 3894.231631 | 1870.282461 | 2537.334759 | 4259.411242 | 4297.402175 | 2292.211624 | 4623.658499 | 4763.937935 | 2725.741628 | 2737.565398 | 1987.067718 |
| Q6ZQL4 | Wdr43    | WD repeat-containing protein 43                                                   | 66.597   | 5.61  | 75381   | 2  | 5754.926694 | 6236.958212 | 5760.989125 | 6096.868901 | 4964.591096 | 5695.716484 | 6211.255427 | 7206.087568 | 6997.611697 | 6715.606999 | 5667.075631 | 4887.325863 | 6279.177328 | 5844.55807  | 7010.649909 |
| Q6ZQM8 | Ugt1a7c  | UDP-glucuronosyltransferase 1-7C                                                  | 815.454  | 55.74 | 59758   | 26 | 543471.7332 | 552468.3544 | 428331.9415 | 448450.3223 | 447346.3432 | 604254.7969 | 506381.7433 | 525730.1423 | 622317.1057 | 570586.6834 | 550636.6752 | 559317.0289 | 534756.8705 | 550845.9978 | 489990.3622 |
| Q6ZVM4 | Lsm8     | U6 snRNA-associated Sm-like protein Lsm8                                          | 113.322  | 46.88 | 10403   | 3  | 39146.19305 | 40849.34507 | 14531.6698  | 41819.05869 | 39277.90275 | 39252.80206 | 46201.31572 | 44606.86803 | 39455.23375 | 41285.70287 | 39469.25135 | 39570.10467 | 36238.18112 | 42792.46629 | 38243.98354 |
| Q6ZWQ7 | Spsc3    | Signal peptidase complex subunit 3                                                | 55.049   | 17.78 | 20313   | 3  | 39601.83742 | 32975.62631 | 40360.4178  | 43241.47393 | 40767.13362 | 60088.102   | 52210.29314 | 54187.39032 | 51786.6231  | 53387.62549 | 41121.48732 | 44981.20042 | 46026.17932 | 46120.73849 | 44687.67316 |
| Q6ZWR6 | Syne1    | Nesprin-1                                                                         | 57.737   | 0.51  | 1009926 | 2  | 1938.768068 | 4924.679137 | 2987.806849 | 5674.336622 | 5426.188193 | 4390.376911 | 4417.823681 | 6352.125546 | 5846.183524 | 5351.554923 | 4505.096499 | 4607.624089 | 6340.031852 | 5922.655893 | 6179.759976 |
| Q71LX4 | Tln2     | Talin-2                                                                           | 478.82   | 5.35  | 253621  | 15 | 388351.479  | 424638.936  | 391868.3693 | 414193.4622 | 415444.3268 | 366577.5248 | 387276.6356 | 382420.6625 | 376665.5718 | 364216.3616 | 394222.5864 | 399644.8147 | 381872.2407 | 405467.1235 | 411159.8997 |
| Q75Q39 | Tom70    | Mitochondrial import receptor subunit TOM70                                       | 18.207   | 2.62  | 67445   | 2  | 20512.48643 | 22529.83921 | 22828.22402 | 20914.44506 | 10107.2154  | 26214.79126 | 11000.81955 | 23923.7361  | 23627.22036 | 24728.66392 | 21237.92843 | 21909.73967 | 24141.97443 | 23323.96235 | 23571.45012 |
| Q75Q40 | Tom40    | Mitochondrial import receptor subunit TOM40 homolog                               | 276.063  | 20.78 | 37919   | 4  | 34913.7394  | 38259.21391 | 39587.60625 | 38912.42871 | 35067.14195 | 37743.79262 | 28939.88389 | 45457.97341 | 44067.80691 | 34732.05103 | 38456.11443 | 37604.83013 | 30433.58795 | 22287.27329 | 36247.63745 |
| Q76MZ3 | Ppp2r1a  | Serine/threonine-protein phosphatase 2A 65 kDa regulatory subunit A alpha isoform | 1194.761 | 59.76 | 65323   | 29 | 549836.4159 | 572173.8317 | 527421.1732 | 549375.4565 | 559352.9309 | 546881.1863 | 563363.777  | 603416.492  | 563367.4811 | 520437.0854 | 527755.3869 | 579019.4664 | 541531.2633 | 566023.5146 | 587884.2814 |
| Q78IK2 | Atp5md   | Up-regulated during skeletal muscle growth protein 5                              | 166.998  | 44.83 | 6382    | 3  | 39385.15575 | 45642.35877 | 40605.29342 | 44748.60266 | 42956.53648 | 47907.97026 | 47665.0174  | 51068.33345 | 51035.56207 | 46526.12748 | 37465.89774 | 38629.2877  | 44907.6188  | 41523.51062 | 39153.01427 |
| Q78IK4 | Apool    | MICOS complex subunit Mic27                                                       | 230.272  | 26.42 | 29261   | 5  | 63540.69124 | 67867.99225 | 58902.98801 | 62470.29765 | 61504.61145 | 60226.38276 | 59153.39558 | 56308.39634 | 57136.85078 | 55959.06426 | 61050.72976 | 55928.68414 | 60718.69711 | 58040.77608 | 59217.81043 |
| Q78P75 | Dynl12   | Dynein light chain 2, cytoplasmic                                                 | 86.955   | 25.84 | 10350   | 2  | 21071.66335 | 24168.2517  | 23458.88609 | 18548.53189 | 19143.81196 | 13215.7826  | 15751.58081 | 14592.94783 | 12660.57102 | 13386.39077 | 15148.05916 | 16776.43605 | 14183.76599 | 14720.18031 | 15765.60659 |
| Q78PY7 | Snd1     | Staphylococcal nuclease domain-containing protein 1                               | 1339.608 | 56.48 | 102088  | 33 | 538457.9134 | 569057.9955 | 516726.0537 | 575390.7593 | 513682.341  | 510982.4797 | 561845.0134 | 538980.1733 | 528831.953  | 484131.6373 | 488232.2687 | 535997.5605 | 509540.0241 | 523036.8481 | 512221.3298 |
| Q78ZA7 | Nap1l4   | Nucleosome assembly protein 1-like 4                                              | 292.049  | 32.27 | 42679   | 8  | 118628.9381 | 121078.3213 | 99050.01278 | 110246.8273 | 107313.3404 | 98472.17285 | 105220.2488 | 104428.3814 | 102972.6052 | 93876.3949  | 115609.8486 | 105985.3039 | 116754.1849 | 106874.1223 | 100915.027  |
| Q791V5 | Mtch2    | Mitochondrial carrier homolog 2                                                   | 426.22   | 46.2  | 33499   | 11 | 163505.8431 | 160925.3249 | 155191.1924 | 149082.6269 | 148041.9386 | 164741.6561 | 147280.7939 | 152948.3492 | 156918.1973 | 141048.6447 | 137401.6886 | 136011.8615 | 131558.7069 | 154183.6125 | 150338.4725 |
| Q792H5 | Ce1f2    | CUGBP Elav-like family member 2                                                   | 155.568  | 10.24 | 54271   | 5  | 42654.41246 | 44914.68801 | 45632.10266 | 51361.59202 | 46218.28161 | 18566.97309 | 45306.76138 | 39577.93334 | 36193.64669 | 26547.4139  | 36180.47395 | 41995.59385 | 38664.69775 | 40014.44903 | 36225.49206 |
| Q794E4 | Hnrnpf   | Heterogeneous nuclear ribonucleoprotein F                                         | 906.329  | 65.78 | 45730   | 19 | 845815.4203 | 896475.7478 | 881754.9919 | 920870.8189 | 889992.2479 | 766281.7579 | 815713.8348 | 854828.9756 | 821881.442  | 797243.6765 | 843166.0408 | 848296.1711 | 808599.6867 | 805440.785  | 795361.8193 |
| Q7M6Y3 | Picalm   | Phosphatidylinositol-binding clathrin assembly protein                            | 553.799  | 26.52 | 71543   | 12 | 152632.6679 | 160037.4822 | 138986.5213 | 152247.8407 | 157389.0545 | 111727.2647 | 136968.1016 | 142774.5912 | 128898.8651 | 139388.8695 | 149797.8597 | 154414.3249 | 153087.1607 | 141725.4525 | 140064.5757 |
| Q7TMB8 | Cyflp1   | Cytoplasmic FMR1-interacting protein 1                                            | 855.917  | 21.79 | 145241  | 24 | 254985.1928 | 274934.595  | 235503.1301 | 244816.7329 | 239640.9471 | 224962.4956 | 242991.6803 | 238528.3443 | 257418.2032 | 241237.0433 | 229032.35   | 253362.5781 | 254463.8757 | 255727.7069 | 250756.4897 |
| Q7TMF3 | Ndufa12  | NADH dehydrogenase [ubiquinone] 1 alpha subcomplex subunit 12                     | 41.292   | 17.24 | 17086   | 2  | 1025.700374 | 5610.369041 | 738.4982039 | 1003.19557  | 915.6415967 | 4537.419793 | 1036.022529 | 4742.633502 | 5649.85791  | 891.1082497 | 955.067833  | 4478.743246 | 924.2025894 | 913.6173952 | 907.1572004 |
| Q7TMK9 | Syncrip  | Heterogeneous nuclear ribonucleoprotein Q                                         | 603.878  | 33.71 | 69633   | 18 | 419594.2451 | 423132.5028 | 475142.8745 | 458983.665  | 477774.9868 | 444004.7483 | 470735.9464 | 482422.864  | 449595.4334 | 457368.9841 | 458415.3228 | 468029.9913 | 444333.8834 | 459217.3739 | 459650.3379 |
| Q7TMQ7 | Wdr91    | WD repeat-containing protein 91                                                   | 201.738  | 11.1  | 83421   | 7  | 31093.85293 | 32473.29284 | 34936.54337 | 34008.78634 | 28994.84153 | 30668.57718 | 32311.14389 | 26852.53075 | 30270.02304 | 26934.87483 | 33398.42394 | 31218.67682 | 29688.67731 | 34750.96057 | 32507.41049 |
| Q7TMR0 | Prpc     | Lysosomal Pro-X carboxypeptidase                                                  | 92.213   | 13.85 | 55027   | 3  | 15648.9649  | 18035.58442 | 15373.24519 | 15386.48668 | 13130.68785 | 10165.61527 | 11087.04351 | 14218.33031 | 8837.17667  | 11126.61853 | 13640.22829 | 13174.38789 | 14384.22781 | 15741.46263 | 14031.50984 |
| Q7TMY8 | Huwei1   | E3 ubiquitin-protein ligase HUWE1                                                 | 171.937  | 3.29  | 482635  | 8  | 26108.51891 | 27376.59522 | 23786.61211 | 15961.73613 | 19048.61199 | 14937.77372 | 13229.84335 | 21942.93718 | 20020.68281 | 12568.71025 | 22693.63258 | 18064.58489 | 16275.44616 | 15229.84156 | 14236.37672 |
| Q7TNO5 | Ap1s3    | AP-1 complex subunit sigma-3                                                      | 14.946   | 12.34 | 18440   | 2  | 3321.827113 | 2924.374582 | 1734.440287 | 1970.416936 | 1881.150624 | 1261.190853 | 2662.714188 | 1626.912204 | 1732.145778 | 861.5683376 | 1727.892561 | 2835.088443 | 3065.648226 | 1821.826615 | 2824.869233 |
| Q7TNC4 | Luc7l2   | Putative RNA-binding protein Luc7-like 2                                          | 113.31   | 8.67  | 46583   | 3  | 33769.26695 | 41659.19661 | 44132.33637 | 43756.46809 | 44313.6004  | 37897.02756 | 42199.05178 | 43627.8276  | 36456.33952 | 43987.77938 | 40815.49802 | 45038.98963 | 41586.21891 | 43563.01139 | 38915.38257 |
| Q7TNG5 | Eml2     | Echinoderm microtubule-associated protein-like 2                                  | 276.909  | 20.03 | 70734   | 9  | 96413.48096 | 95170.30185 | 89282.91862 | 88958.06366 | 95670.8781  | 84665.41923 | 95166.27551 | 95883.06986 | 90515.73895 | 85097.06637 | 85128.09125 | 90971.32312 | 91241.95073 | 91185.27004 | 93839.64985 |
| Q7TPD0 | Ints3    | Integrator complex subunit 3                                                      | 163.768  | 6.34  | 117938  | 3  | 8236.075807 | 7747.919871 | 8289.342143 | 9918.45802  | 6357.777897 | 6045.747615 | 7978.725001 | 8478.256957 | 7475.394856 | 8204.579117 | 8569.046969 | 7872.207289 | 6744.091581 | 7715.894391 | 8024.594662 |
| Q7TPJ0 | Ssr1     | Translocon-associated protein subunit alpha                                       | 59.898   | 10.66 | 35629   | 3  | 91777.21708 | 93956.92738 | 59995.20203 | 89004.28602 | 92953.32819 | 116210.1102 | 115008.7113 | 114894.5028 | 118619.4071 | 109221.7031 | 104006.5959 | 100796.0949 | 103145.8821 | 101682.0907 | 102047.98   |
| Q7TPR4 | Actn1    | Alpha-actinin-1                                                                   | 1341.234 | 44.73 | 103068  | 32 | 709871.1486 | 687717.5613 | 615846.4399 | 662365.5076 | 643756.2116 | 508731.8351 | 563249.924  | 585402.8842 | 572247.5621 | 586496.581  | 667561.9816 | 649872.5016 | 643771.0549 | 681692.4772 | 676829.37   |
| Q7TPV4 | Mybbp1a  | Myb-binding protein 1A                                                            | 1303.757 | 42.49 | 152037  | 36 | 359822.0545 | 395076.1825 | 358222.6998 | 403250.2813 | 357092.1238 | 357943.2975 | 390508.1325 | 425428.301  | 390223.4219 | 331320.828  | 383678.7174 | 427297.989  | 374132.7406 | 355854.2864 | 390549.5914 |
| Q7TQH0 | Atxn2l   | Ataxin-2-like protein                                                             | 125.609  | 5.72  | 110649  | 4  | 17917.85091 | 19295.89313 | 13150.94033 | 24621.51061 | 9904.102584 | 16338.69975 | 24222.46271 | 17016.69906 | 24228.72683 | 18187.59633 | 23379.98825 | 16442.76577 | 16425.21027 | 21197.93134 | 21322.89393 |
| Q7TSI3 | Ppp8r1   | Serine/threonine-protein phosphatase 6 regulatory subunit 1                       | 80.721   | 5.26  | 94527   | 3  | 17204.51555 | 9296.763106 | 13660.68261 | 11759.72215 | 11116.60077 | 8959.042733 | 14014.95007 | 12185.39504 | 12325.42318 | 12452.86458 | 11454.34363 | 14777.68626 | 13768.72346 | 10888.88286 | 11780.30527 |
| Q7TSS2 | Ube2q1   | Ubiquitin-conjugating enzyme E2 Q1                                                | 36.697   | 4.5   | 46173   | 2  | 9908.063574 | 10008.5717  | 10869.65973 | 5903.348847 | 10201.63631 | 9317.783204 | 10262.07437 | 9753.532446 | 11300.61071 | 10820.12935 | 8658.631796 | 11290.74327 | 12606.3088  | 11582.14839 | 11163.02387 |
| Q7TSV4 | Pgm2     | Phosphoglucomutase-2                                                              | 82.058   | 12.42 | 68748   | 4  | 26805.6597  | 23241.08819 | 26796.58182 | 13964.93581 | 22753.74607 | 10023.75771 | 18232.96964 | 12903.5359  | 11087.92879 | 11580.07099 | 25181.14738 | 21813.24016 | 25409.80113 | 24846.65525 | 21053.68886 |
| Q7TT50 | Cdc42bpb | Serine/threonine-protein kinase MRCK beta                                         | 72       |       |         |    |             |             |             |             |             |             |             |             |             |             |             |             |             |             |             |

|        |          |                                                                     |         |       |        |    |             |             |             |             |             |             |             |             |             |             |             |              |             |             |             |
|--------|----------|---------------------------------------------------------------------|---------|-------|--------|----|-------------|-------------|-------------|-------------|-------------|-------------|-------------|-------------|-------------|-------------|-------------|--------------|-------------|-------------|-------------|
| Q80UM3 | Naa15    | N-alpha-acetyltransferase 15, NaA auxiliary subunit                 | 465.937 | 25.78 | 100961 | 18 | 120460.7949 | 148956.9248 | 125263.7484 | 148257.3559 | 124090.4634 | 140516.0821 | 135637.998  | 159385.6072 | 157009.0281 | 140975.1839 | 111280.1258 | 154997.0987  | 121735.0779 | 128818.173  | 141772.6873 |
| Q80UM7 | Mogs     | Mannosyl-oligosaccharide glucosidase                                | 495.036 | 21.82 | 91831  | 11 | 89378.04751 | 96348.19348 | 84668.42137 | 91527.30249 | 79757.49607 | 109327.3763 | 101203.957  | 93485.72181 | 94182.46687 | 112747.3235 | 93424.82018 | 93122.95097  | 107294.0557 | 97824.86868 | 96748.43007 |
| Q80UU9 | Pgrmc2   | Membrane-associated progesterone receptor component 2               | 189.428 | 20.28 | 23334  | 2  | 4567.883493 | 9845.597864 | 9685.006931 | 8457.057558 | 9724.927693 | 10018.49067 | 3873.653841 | 7882.874015 | 8899.409919 | 3433.255265 | 6258.37741  | 4301.115095  | 3938.334276 | 3382.15414  | 5012.592009 |
| Q80UY2 | Kcmf1    | E3 ubiquitin-protein ligase KCMF1                                   | 89.458  | 8.14  | 41791  | 2  | 2383.852643 | 2207.79221  | 1922.717205 | 2267.5042   | 1188.270702 | 1085.099778 | 1065.494076 | 2121.331521 | 2209.145391 | 1294.678344 | 2290.672715 | 1507.487475  | 1908.937147 | 1839.412475 | 1723.941782 |
| Q80VA0 | Galnt7   | N-acetylgalactosaminyltransferase 7                                 | 30.194  | 5.02  | 75419  | 2  | 21412.11024 | 21507.93754 | 16585.91182 | 21408.51763 | 23499.60138 | 27394.95225 | 28445.71031 | 25275.94119 | 27748.62196 | 25265.82877 | 22865.81593 | 22379.71114  | 24845.75244 | 24441.26906 | 21936.2552  |
| Q80VD1 | Fam98b   | Protein FAM98B                                                      | 80.732  | 6.76  | 45349  | 2  | 20797.90325 | 18245.25428 | 17106.01396 | 17039.3901  | 19645.27682 | 14916.93455 | 12164.15694 | 14078.19958 | 9390.045996 | 14927.73866 | 16112.64599 | 17400.40188  | 16863.18862 | 16045.16361 | 16107.21025 |
| Q80VJ3 | Dnph1    | 2'-deoxynucleoside 5'-phosphate N-hydrolase 1                       | 97.056  | 17.92 | 18977  | 2  | 16976.81882 | 11263.22184 | 11636.37186 | 13157.03724 | 13156.42257 | 14619.55109 | 14812.48553 | 13143.72313 | 15268.86071 | 12657.01476 | 14315.05747 | 13794.99012  | 10101.08664 | 13833.61302 | 13345.96884 |
| Q80VL1 | Tdrkh    | Tudor and KH domain-containing protein                              | 86.022  | 6.25  | 62134  | 2  | 8225.858205 | 8975.100481 | 7907.904726 | 13233.64805 | 7941.974687 | 9033.128463 | 8473.431855 | 7423.554068 | 10733.16357 | 11957.62836 | 8285.42572  | 9013.553207  | 0.00981159  | 7541.264168 | 7595.922063 |
| Q80W54 | Zmpste24 | CAAX prenyl protease 1 homolog                                      | 94.956  | 13.26 | 54735  | 4  | 15268.76939 | 16907.09995 | 21755.72406 | 16560.48882 | 18971.56799 | 23135.70703 | 25619.4533  | 20871.26085 | 23318.45962 | 22311.31141 | 17445.64021 | 12992.78958  | 24578.67114 | 20442.59676 | 18666.69679 |
| Q80WJ7 | Mtdh     | Protein LYRIC                                                       | 516.935 | 27.98 | 63846  | 11 | 77941.63983 | 82351.92405 | 77544.4471  | 89677.72016 | 77239.61624 | 63580.66723 | 90506.83195 | 74601.95311 | 77540.76123 | 67990.61633 | 76132.16054 | 87326.91236  | 89097.31373 | 61812.62153 | 85112.05042 |
| Q80WQ2 | Vac14    | Protein VAC14 homolog                                               | 349.148 | 19.44 | 88048  | 9  | 45301.20295 | 48925.14671 | 41911.38073 | 44063.18189 | 36946.16593 | 35251.67463 | 39960.09437 | 42725.73497 | 42903.38227 | 36357.17045 | 40385.93582 | 40850.03074  | 40739.21377 | 41259.57    | 47415.36883 |
| Q80WS3 | Fbl1     | rRNA/rRNA 2'-O-methyltransferase fibrillar-in-like protein 1        | 101.924 | 11.46 | 33339  | 3  | 128669.822  | 122452.1324 | 118268.0344 | 108542.4511 | 123049.2379 | 115018.4355 | 126253.5652 | 121887.1736 | 123274.4594 | 119255.6734 | 126014.8122 | 128137.1324  | 125554.5043 | 125537.5797 | 117018.9168 |
| Q80X41 | Vrk1     | Serine/threonine-protein kinase VRK1                                | 196.372 | 25    | 49741  | 8  | 58969.13571 | 52539.59573 | 56328.58203 | 57992.45128 | 53397.80417 | 46957.55082 | 50205.7746  | 46540.50193 | 48817.33015 | 48960.13855 | 47202.06296 | 52164.7868   | 54535.37411 | 56653.60198 | 55869.59314 |
| Q80X50 | Ubpap2   | Ubiquitin-associated protein 2-like                                 | 211.611 | 9.03  | 116799 | 7  | 72707.55171 | 57921.31703 | 69446.7714  | 80281.96117 | 66296.15629 | 76975.10122 | 69240.47509 | 68992.28045 | 74181.97842 | 65320.53158 | 84129.51433 | 74631.41045  | 78169.16459 | 76018.74813 | 73243.18819 |
| Q80X82 | Sympk    | Sympk                                                               | 251.144 | 12.38 | 142284 | 8  | 25869.20042 | 25248.54845 | 20223.7144  | 23375.32042 | 20444.43453 | 18158.54649 | 19559.40722 | 20529.03499 | 22283.58852 | 19154.6702  | 20544.12981 | 20889.52764  | 20757.78773 | 22460.70729 | 19868.92471 |
| Q80XI3 | Eif4g3   | Eukaryotic translation initiation factor 4 gamma 3                  | 137.247 | 3.74  | 174890 | 5  | 31490.64816 | 28630.76136 | 33473.60423 | 26371.82491 | 30339.05824 | 23421.3014  | 30617.05673 | 35473.14976 | 31136.08469 | 27207.84708 | 30001.01785 | 29517.51359  | 28179.40945 | 30818.10676 | 31197.53006 |
| Q80XQ2 | Tbc1d5   | TBC1 domain family member 5                                         | 48.421  | 3.07  | 91837  | 2  | 11625.77175 | 13907.18511 | 14267.7577  | 13223.78453 | 13406.09284 | 10548.39729 | 11892.61011 | 11555.57053 | 10201.40996 | 11734.48193 | 11452.54022 | 11816.33703  | 13263.31496 | 13961.35161 | 14278.11236 |
| Q80Y81 | Ela2c    | Zinc phosphodiesterase ELAC protein 2                               | 56.003  | 4.93  | 92719  | 2  | 7093.071264 | 6321.145368 | 4695.83139  | 5597.922987 | 4968.349995 | 4607.207631 | 5957.51787  | 6771.07486  | 5397.463145 | 5034.80674  | 5927.867132 | 53121.380603 | 5383.185834 | 3764.575889 | 4935.65064  |
| Q80Y98 | Ddh2     | Phospholipase DDHD2                                                 | 31.513  | 4.43  | 79577  | 2  | 2336.031951 | 9426.051111 | 8256.57634  | 3027.526627 | 8448.652209 | 6855.048336 | 8266.598001 | 9435.062677 | 8339.96723  | 8168.439785 | 8078.507984 | 8685.874235  | 8211.548526 | 8888.109341 | 8284.323832 |
| Q80YW0 | Cyfh4    | Cytohesin-4                                                         | 40.33   | 7.89  | 45285  | 3  | 4203.427799 | 7438.614233 | 4107.137828 | 8607.876908 | 7363.767522 | 6788.599704 | 7000.809205 | 7922.135128 | 7565.27713  | 3472.907197 | 8898.102333 | 7894.213379  | 3904.154964 | 9138.054581 | 7611.147368 |
| Q80ZJ1 | Rap2a    | Ras-actin-binding protein Rap-2a                                    | 136.594 | 38.25 | 20642  | 4  | 48520.12684 | 42863.31847 | 36866.88068 | 45390.06634 | 46440.61668 | 38044.01403 | 35884.8388  | 32633.39271 | 45259.70313 | 38677.71684 | 50129.56813 | 40630.34481  | 50516.19356 | 42976.72306 | 43989.64009 |
| Q810A7 | Ddx42    | ATP-dependent RNA helicase DDX42                                    | 69.43   | 3.55  | 101965 | 2  | 12945.65743 | 8675.353736 | 13771.96172 | 15446.58836 | 11116.86941 | 6157.337886 | 3970.625976 | 5225.416259 | 10945.92936 | 10874.20765 | 9307.769759 | 9005.15722   | 7148.757716 | 10643.23316 | 8493.67159  |
| Q810B6 | Ankfy1   | Rabankyrin-5                                                        | 529.491 | 16.6  | 128653 | 12 | 93374.56574 | 83124.266   | 87893.30095 | 88924.28649 | 86644.77505 | 72076.03938 | 85309.98898 | 76919.45459 | 79154.274   | 71223.10601 | 98894.34258 | 82999.65517  | 79935.80027 | 85777.79462 | 79831.99876 |
| Q811U4 | Mfn1     | Mitofusin-1                                                         | 14.964  | 2.43  | 83726  | 2  | 4533.683039 | 5544.90499  | 4277.958817 | 1773.64944  | 4855.229649 | 7949.795271 | 7063.216788 | 6027.877731 | 8439.63022  | 7412.798902 | 5394.146547 | 6064.321278  | 1790.554669 | 5007.271302 | 4736.943386 |
| Q812A2 | Srgap3   | SLIT-ROBO Rho GTPase-activating protein 3                           | 64.24   | 2.37  | 124420 | 2  | 6102.616377 | 5986.491004 | 7309.029561 | 10271.03078 | 6368.739955 | 5667.602473 | 5577.884471 | 6010.000779 | 4805.023385 | 6859.479603 | 6675.554158 | 5405.307684  | 6474.220703 | 5897.696788 | 6109.940454 |
| Q812D1 | Psp1     | PC4 and SFRS1-interacting protein                                   | 125.406 | 10.23 | 59639  | 4  | 25395.86531 | 39390.51727 | 28932.76605 | 41824.20368 | 40932.66985 | 20147.89093 | 26001.92876 | 23023.01128 | 30633.19829 | 26506.14796 | 39715.75747 | 28732.48656  | 39094.99239 | 40045.17268 | 31145.34982 |
| Q8BFQ4 | Wdr82    | WD repeat-containing protein 82                                     | 125.611 | 14.7  | 35079  | 3  | 9700.523416 | 17085.47843 | 16603.71082 | 17771.40466 | 11012.24636 | 11340.49831 | 11632.41695 | 6048.853078 | 10753.45006 | 10477.60408 | 11755.32503 | 17142.06905  | 14714.6233  | 11989.70953 | 11176.52091 |
| Q8BFQ8 | Gatd1    | Glutamine amidotransferase-like class 1 domain-containing protein 1 | 95.04   | 10.45 | 23277  | 2  | 13691.24619 | 13446.45344 | 11558.15516 | 11970.77332 | 11865.0557  | 8552.679911 | 9611.275024 | 11660.04108 | 12205.52426 | 7847.212622 | 12025.38605 | 13217.31203  | 13648.34383 | 12486.92387 | 11054.6837  |
| Q8BFR4 | Gns      | N-acetylglucosamine-6-sulfatase                                     | 106.863 | 16.36 | 61175  | 7  | 134064.2167 | 125010.6262 | 106646.4873 | 89725.91431 | 84441.45249 | 67752.26654 | 74146.4868  | 58072.50904 | 72215.34075 | 99693.01416 | 120493.3582 | 86781.31813  | 120536.2487 | 93249.46604 | 129995.8566 |
| Q8BFR5 | Tufm     | Elongation factor Tu, mitochondrial                                 | 475.295 | 41.37 | 49508  | 15 | 363752.104  | 331155.4083 | 326764.9579 | 329883.5799 | 338885.7429 | 370523.5682 | 356397.3004 | 341986.8329 | 354631.8783 | 343723.7602 | 340418.8736 | 327521.3498  | 339550.9669 | 335588.4428 | 321464.5927 |
| Q8BFV2 | Pcid2    | PCI domain-containing protein 2                                     | 114.783 | 10.78 | 46132  | 3  | 4759.090797 | 5362.703708 | 4438.025896 | 5516.669987 | 3811.65413  | 3533.913225 | 4544.992465 | 3844.823147 | 4322.383067 | 3736.140931 | 4827.8349   | 3532.251969  | 5055.549977 | 4907.347344 | 4727.361658 |
| Q8BFY9 | Tnpo1    | Transportin-1                                                       | 520.106 | 25.28 | 102357 | 18 | 138793.2243 | 143620.7633 | 135793.2431 | 152615.4552 | 140661.7169 | 154820.4821 | 140440.0603 | 141313.2093 | 150550.5061 | 146796.1189 | 131204.995  | 144437.4199  | 135390.751  | 149079.6951 | 142861.681  |
| Q8BFZ3 | Actbl2   | Beta-actin-like protein 2                                           | 877.627 | 35.9  | 42004  | 21 | 17038360.48 | 17822354.05 | 17745924.74 | 18720221.1  | 17021821.69 | 17984067.15 | 17455294.04 | 17674553.08 | 17902872.87 | 17663693.15 | 18033342.87 | 18097326.8   | 18709223.67 | 18753409.65 | 17398280.5  |
| Q8BFZ9 | Erlin2   | Erlin-2                                                             | 170.441 | 17.65 | 37873  | 5  | 32201.5948  | 35996.16479 | 29668.42949 | 60380.4868  | 34694.06241 | 34365.49203 | 30869.85161 | 34155.5842  | 34415.57329 | 35566.67063 | 29084.75984 | 29658.51544  | 33316.50051 | 31688.35714 | 32273.01901 |
| Q8BG07 | Pld4     | Phospholipase D4                                                    | 660.298 | 46.52 | 56154  | 18 | 832412.6799 | 772652.8066 | 684692.0799 | 693074.3979 | 733098.8391 | 573817.2116 | 542990.968  | 519038.2501 | 553789.7053 | 626453.4654 | 721722.5693 | 662297.6926  | 755984.6812 | 763164.668  | 739245.9072 |
| Q8BG51 | Rhot1    | Mitochondrial Rho GTPase 1                                          | 91.504  | 4.44  | 72242  | 3  | 8197.825405 | 11640.26782 | 12655.72684 | 12771.03466 | 13785.64765 | 17024.50574 | 12733.87152 | 14524.82656 | 14641.10912 | 10312.55697 | 10040.31591 | 12513.22884  | 11209.7614  | 12242.66307 | 6149.177269 |
| Q8BG73 | Sh3bgr12 | SH3 domain-binding glutamic acid-rich-like protein 2                | 73.009  | 24.3  | 12255  | 2  | 24651.27296 | 27128.86371 | 23337.60373 | 27268.57543 | 20987.51593 | 23805.4738  | 24344.01645 | 19671.37524 | 18687.42003 | 24002.37241 | 21626.15415 | 26907.45987  | 24681.67812 | 28776.61306 | 26784.63751 |
| Q8BG81 | Poldip3  | Polymerase delta-interacting protein 3                              | 192.148 | 15.95 | 46132  | 5  | 26786.86869 | 26159.80253 | 22576.25876 | 21089.98915 | 22597.17417 | 21120.50173 | 23876.41061 | 21522.38878 | 20041.52967 | 21684.32022 | 25704.80845 | 25370.97843  | 28092.32233 | 23854.96182 | 21948.73432 |
| Q8BGD9 | Eif4b    | Eukaryotic translation initiation factor 4B                         | 406.935 | 21.6  | 68840  | 8  | 75711.77647 | 65060.48323 | 71877.221   | 66916.38909 | 72062.51868 | 58694.0333  | 66407.25354 | 73168.56142 | 60860.11083 | 58586.63097 | 70013.24369 | 67622.0023   | 68197.72399 | 58436.29694 | 61649.87161 |
| Q8BGH2 | Samm50   | Sorting and assembly machinery component 50 homolog                 | 237.323 | 22.81 | 51864  | 8  | 110915.1693 | 116352.9459 |             |             |             |             |             |             |             |             |             |              |             |             |             |

|        |          |                                                                                                         |          |       |        |    |             |             |             |             |             |             |             |             |             |             |             |             |             |             |             |
|--------|----------|---------------------------------------------------------------------------------------------------------|----------|-------|--------|----|-------------|-------------|-------------|-------------|-------------|-------------|-------------|-------------|-------------|-------------|-------------|-------------|-------------|-------------|-------------|
| Q8BHD7 | Ptpb3    | Polypyrimidine tract-binding protein 3                                                                  | 385.747  | 37.48 | 56701  | 12 | 399023.5697 | 370692.5041 | 418331.959  | 459089.9398 | 441568.3425 | 343394.9487 | 399216.5728 | 393142.7928 | 393170.6083 | 387455.2125 | 408745.668  | 390230.5495 | 369638.6006 | 398493.3756 | 380103.2247 |
| Q8BHF7 | Pgs1     | CDP-diacylglycerol--glycerol-3-phosphate 3-phosphatidyltransferase, mitochondrial                       | 34.03    | 4.16  | 62489  | 2  | 7450.602194 | 5859.11769  | 12296.25196 | 7406.188941 | 3543.319303 | 9830.364785 | 9764.734945 | 8932.785276 | 9474.180383 | 8145.719742 | 5950.691328 | 6867.653416 | 4105.96868  | 9678.067696 | 9358.794871 |
| Q8BHG1 | Nrdc     | Nardilysin                                                                                              | 237.392  | 13.7  | 132891 | 12 | 52864.40517 | 70371.21234 | 60346.68383 | 62555.98786 | 65909.40502 | 71883.85233 | 70095.82919 | 67709.42384 | 61318.82036 | 65451.95521 | 68284.01152 | 69766.40254 | 60670.20823 | 65817.35771 | 70776.44551 |
| Q8BHL5 | Elmo2    | Engulfment and cell motility protein 2                                                                  | 288.182  | 21.45 | 83887  | 12 | 125460.9178 | 66634.80424 | 149494.2953 | 147037.7092 | 144547.7782 | 88463.62195 | 88829.48932 | 65370.33601 | 86768.43901 | 66487.23343 | 87477.17141 | 74884.90676 | 90006.58323 | 77357.09914 | 85329.83673 |
| Q8BHN3 | Ganab    | Neutral alpha-glucosidase AB                                                                            | 999.162  | 43.64 | 106911 | 31 | 583785.054  | 586531.0477 | 563682.2602 | 549605.4678 | 567588.4376 | 680867.2409 | 649421.3302 | 678890.4668 | 689753.6663 | 639805.5674 | 610811.6696 | 617685.1684 | 625006.585  | 614341.1735 | 604305.2517 |
| Q8BH20 | Fam49a   | Protein FAM49A                                                                                          | 122.261  | 18.58 | 37343  | 4  | 22979.64461 | 26824.89052 | 20710.36303 | 23806.99968 | 18171.73042 | 9603.793781 | 17297.76721 | 15515.83529 | 14037.60436 | 15833.12342 | 23556.69771 | 24004.81462 | 22735.9613  | 23304.76125 | 20435.56309 |
| Q8BIG7 | Comtd1   | Catechol O-methyltransferase domain-containing protein 1                                                | 87.731   | 21.76 | 28961  | 3  | 20818.75701 | 9301.248564 | 3121.392374 | 9605.410422 | 2483.097584 | 3374.971408 | 4651.642408 | 4320.102826 | 4081.157158 | 3332.844766 | 11394.90673 | 15370.8951  | 3035.618285 | 6965.21942  | 3418.968262 |
| Q8BIJ6 | Iars2    | Isoleucine--tRNA ligase, mitochondrial                                                                  | 409.097  | 16.9  | 112804 | 12 | 106509.1605 | 111154.5035 | 102980.1764 | 113251.2717 | 101164.5581 | 118753.5719 | 118100.9668 | 107215.4987 | 119260.0562 | 107929.312  | 103880.9993 | 101325.2323 | 112184.6526 | 114558.1737 | 114082.8265 |
| Q8BIJ7 | Rufy1    | RUN and FYVE domain-containing protein 1                                                                | 133.283  | 11.24 | 80376  | 6  | 20535.44819 | 26791.19807 | 22551.16684 | 23576.14695 | 22495.60949 | 15182.34311 | 12902.79401 | 21297.97306 | 14793.16948 | 24783.02028 | 20536.48973 | 20703.31697 | 25261.34687 | 22357.27148 | 20780.98716 |
| Q8BJ71 | Nup93    | Nuclear pore complex protein Nup93                                                                      | 194.733  | 14.65 | 93281  | 7  | 60087.53891 | 69334.59421 | 65380.35922 | 58755.40914 | 63818.46921 | 68304.77165 | 71644.865   | 64992.89087 | 68507.84952 | 57291.25612 | 57260.57988 | 60483.22621 | 61089.60465 | 53879.84008 | 63332.35147 |
| Q8BJS4 | Sun2     | SUN domain-containing protein 2                                                                         | 309.489  | 16.01 | 81605  | 8  | 56903.53582 | 79908.4546  | 78808.08689 | 89468.46309 | 90888.69847 | 77099.28565 | 62742.76359 | 66049.08043 | 74806.23036 | 76010.18138 | 85890.05512 | 77487.26868 | 89224.62892 | 84611.27948 | 84463.90275 |
| Q8BJW5 | Nol11    | Nucleolar protein 11                                                                                    | 42.597   | 5.67  | 80818  | 2  | 4810.817459 | 4221.922752 | 4393.28649  | 5907.355473 | 3566.263509 | 8641.254756 | 5031.679047 | 5973.298229 | 5523.267817 | 4290.232401 | 5872.544488 | 3826.194199 | 3885.703092 | 4679.383081 | 3855.521564 |
| Q8BJW6 | Eif2a    | Eukaryotic translation initiation factor 2A                                                             | 368.948  | 31.84 | 64403  | 13 | 108755.386  | 120201.0206 | 108034.2165 | 100161.2179 | 116423.127  | 104693.8185 | 114208.9377 | 110557.1678 | 104424.11   | 95053.28004 | 107076.0962 | 109603.476  | 110055.9496 | 102982.8669 | 109064.2407 |
| Q8BJY1 | Psmd5    | 26S proteasome non-ATPase regulatory subunit 5                                                          | 133.829  | 10.91 | 55972  | 4  | 51124.43242 | 31867.26732 | 32222.7743  | 29818.71085 | 49181.68296 | 29855.22989 | 35579.06877 | 33941.74815 | 30397.29735 | 31639.60314 | 36186.3398  | 32135.45382 | 35121.20516 | 51630.75372 | 32553.68529 |
| Q8BK64 | Ahsa1    | Activator of 90 kDa heat shock protein ATPase homolog 1                                                 | 296.164  | 32.84 | 38117  | 7  | 105604.8395 | 109082.8553 | 82311.43587 | 113393.057  | 102798.6274 | 102264.785  | 113213.5889 | 120680.3517 | 124207.4056 | 109252.6259 | 111659.8203 | 121109.7095 | 111877.1966 | 115341.4517 | 125368.304  |
| Q8BK67 | Rcc2     | Protein RCC2                                                                                            | 650.406  | 48.27 | 55983  | 19 | 383684.7448 | 400911.4937 | 409006.9143 | 347067.4401 | 390473.2661 | 267541.1641 | 334393.7519 | 319000.5754 | 308262.6544 | 298527.5401 | 312931.0769 | 335490.527  | 335611.4957 | 335396.1387 | 339616.4156 |
| Q8BK72 | Mrps27   | 28S ribosomal protein S27, mitochondrial                                                                | 55.244   | 7.47  | 47779  | 3  | 13783.26392 | 15577.98648 | 12843.88531 | 15131.86933 | 15765.24544 | 13869.37836 | 18201.80826 | 13898.02406 | 14506.10144 | 14428.53302 | 13251.93819 | 18440.43097 | 13965.65311 | 16040.81724 | 17639.89143 |
| Q8BKCS | Ipo5     | Importin-5                                                                                              | 952.868  | 31.08 | 123591 | 24 | 278963.3315 | 278782.3823 | 217733.2787 | 280058.7897 | 234425.8183 | 223852.2219 | 268958.1998 | 283757.6059 | 251910.1604 | 219249.0644 | 271432.7878 | 290199.2955 | 255964.9117 | 229957.0254 | 240574.0857 |
| Q8BKE6 | Cyp20a1  | Cytochrome P450 20A1                                                                                    | 57.927   | 9.96  | 52149  | 3  | 9557.685443 | 9071.657405 | 13925.0809  | 8529.550547 | 15966.77845 | 8941.726704 | 13899.80518 | 9197.860188 | 13603.96937 | 9414.86795  | 8300.821018 | 12667.57302 | 8748.261543 | 13897.52723 | 8181.304407 |
| Q8BL66 | Eea1     | Early endosome antigen 1                                                                                | 379.141  | 9.99  | 160915 | 11 | 89314.03017 | 84720.92639 | 70584.02439 | 75498.27683 | 85577.11538 | 55486.64078 | 76677.52884 | 75999.08751 | 76561.51147 | 86838.0481  | 94662.0459  | 85246.66397 | 85599.14824 | 85937.40818 | 88230.34416 |
| Q8BL97 | Srsf7    | Serine/arginine-rich splicing factor 7                                                                  | 91.117   | 14.61 | 30818  | 4  | 82013.34677 | 88626.44523 | 72166.08475 | 66254.93241 | 93634.54242 | 92151.36582 | 92733.95335 | 83210.63506 | 90134.57455 | 60411.05035 | 65303.31951 | 61892.83269 | 99817.10394 | 87981.87826 | 57156.97851 |
| Q8BLF1 | Nceh1    | Neutral cholesterol ester hydrolase 1                                                                   | 471.958  | 49.51 | 45740  | 12 | 159591.4439 | 192160.6427 | 175278.5726 | 197308.0866 | 158658.4921 | 223752.6679 | 230149.613  | 233834.1438 | 245617.6884 | 216724.1031 | 189807.7541 | 192631.8062 | 200006.6853 | 186785.9225 | 222132.4819 |
| Q8BLN5 | Lss      | Lanosterol synthase                                                                                     | 44.572   | 3     | 83141  | 2  | 4568.418205 | 4862.286864 | 3467.645188 | 1990.74753  | 4488.693071 | 1463.831892 | 4240.947225 | 5251.927472 | 5502.494179 | 945.0659292 | 3864.103526 | 2202.758056 | 4111.199778 | 3639.967906 | 2074.356455 |
| Q8BMA6 | Srp68    | Signal recognition particle subunit SRP68                                                               | 116.462  | 6.72  | 70574  | 3  | 13767.12591 | 11146.7682  | 9572.813679 | 13195.33691 | 8344.3169   | 7607.744236 | 10962.17574 | 9568.409916 | 10439.99341 | 9121.137849 | 11406.13651 | 9237.383875 | 10680.87499 | 8422.834974 | 9708.995084 |
| Q8BMD8 | Slc25a24 | Calcium-binding mitochondrial carrier protein SCAAC-1                                                   | 401.143  | 41.05 | 52902  | 12 | 188018.9733 | 190006.8667 | 174534.3455 | 183568.7462 | 210962.4504 | 200616.6483 | 179580.2654 | 191538.8061 | 190630.4117 | 182124.3049 | 190089.057  | 172970.4158 | 191173.8601 | 178042.4585 | 175515.8908 |
| Q8BMF4 | Dlat     | Dihydropolyllysine-residue acetyltransferase component of pyruvate dehydrogenase complex, mitochondrial | 477.868  | 30.53 | 67942  | 12 | 222732.2657 | 225461.7403 | 212000.0347 | 216890.9058 | 203530.1372 | 256268.2831 | 235479.8813 | 223412.917  | 259359.641  | 235744.2511 | 215742.656  | 232386.3961 | 241849.1142 | 231747.0159 | 224777.662  |
| Q8BMG7 | Rab3gap2 | Rab3 GTPase-activating protein non-catalytic subunit                                                    | 136.472  | 7.69  | 152535 | 8  | 43004.96541 | 45945.04068 | 43516.01288 | 38790.77861 | 40090.71772 | 44382.85768 | 47348.99525 | 48308.45768 | 45767.94247 | 46101.52987 | 45498.31381 | 46726.75053 | 42396.65136 | 45580.69639 | 44577.99779 |
| Q8BMJ2 | Lars     | Leucine--tRNA ligase, cytoplasmic                                                                       | 855.886  | 30.14 | 134192 | 26 | 285470.4615 | 306538.8982 | 283703.462  | 296965.1506 | 286023.5912 | 324687.3158 | 328361.0778 | 344542.2008 | 330266.6469 | 291402.5988 | 305146.3578 | 314411.7274 | 298290.0316 | 294126.8003 | 301027.3862 |
| Q8BMJ3 | Eif1ax   | Eukaryotic translation initiation factor 1A, X-chromosomal                                              | 158.528  | 18.75 | 16460  | 3  | 20149.90659 | 21277.27819 | 16222.59494 | 20561.6327  | 16967.06827 | 12244.41401 | 13485.65125 | 14970.98661 | 14992.30974 | 12441.42254 | 17009.93055 | 15680.47674 | 17357.13473 | 15054.84963 | 16021.92071 |
| Q8BMK4 | Ckap4    | Cytoskeleton-associated protein 4                                                                       | 910.017  | 51.48 | 63692  | 24 | 294827.8192 | 319749.4099 | 290988.4582 | 289078.0749 | 318473.4688 | 402396.1752 | 364484.1185 | 368682.026  | 393253.5245 | 394190.1654 | 334206.1677 | 313895.8678 | 343749.6995 | 330190.0455 | 330598.709  |
| Q8BML9 | Qars     | Glutamine--tRNA ligase                                                                                  | 529.013  | 23.87 | 87677  | 15 | 117885.7792 | 146804.4496 | 130412.4843 | 137973.0546 | 135470.4185 | 136205.4677 | 119465.4608 | 150567.019  | 123713.6301 | 110136.74   | 135362.2427 | 138171.7042 | 143359.2437 | 132629.4467 | 133335.1432 |
| Q8BMP6 | Acd3     | Golgi resident protein GCP60                                                                            | 221.869  | 18.86 | 60181  | 6  | 24536.99477 | 26030.74802 | 25207.88829 | 24937.56289 | 19538.56458 | 23229.8595  | 20445.06294 | 21182.11569 | 26564.08453 | 23915.11353 | 19766.83751 | 25657.32506 | 24545.84156 | 27529.37624 | 25702.8287  |
| Q8BMS1 | Hadha    | Trifunctional enzyme subunit alpha, mitochondrial                                                       | 1127.238 | 47.44 | 82670  | 24 | 421240.6638 | 408911.8338 | 404841.5324 | 396928.1993 | 372196.0633 | 365087.6897 | 352773.7641 | 334147.3998 | 352267.5945 | 367595.693  | 403551.5424 | 384304.4139 | 367538.9596 | 375836.9315 | 386392.4949 |
| Q8BNV1 | Trmt2a   | tRNA (uracil-5--methyltransferase homolog A                                                             | 34.814   | 4.36  | 63301  | 2  | 12794.80804 | 8606.600034 | 5410.084487 | 5940.888467 | 9812.430075 | 9044.560381 | 11369.8637  | 11245.45688 | 9471.787873 | 10205.81066 | 5754.207788 | 8222.368983 | 5139.644528 | 9897.883289 | 10277.11827 |
| Q8BP40 | Acp6     | Lysophosphatidic acid phosphatase type 6                                                                | 157.119  | 18.9  | 47625  | 5  | 46960.80441 | 41635.53003 | 37555.29647 | 42942.39049 | 46706.63269 | 27386.30652 | 33642.64898 | 36445.56639 | 37809.58823 | 25429.84189 | 44825.54049 | 21083.32142 | 43619.12153 | 42204.68386 | 38611.74466 |
| Q8BP47 | Nars     | Asparagine--tRNA ligase, cytoplasmic                                                                    | 679.96   | 38.1  | 64279  | 18 | 343189.622  | 373948.3963 | 360694.2893 | 390224.2326 | 342030.77   | 387312.849  | 425720.078  | 409562.2465 | 424401.3301 | 353508.6096 | 330088.2992 | 406040.3285 | 347614.2887 | 380780.6681 | 400825.1769 |
| Q8BP48 | Metap1   | Methionine aminopeptidase 1                                                                             | 116.45   | 12.95 | 43221  | 3  | 12730.947   | 9526.42989  | 10511.61133 | 11983.35952 | 8674.444478 | 8017.584323 | 12622.7229  | 11653.86165 | 12873.53618 | 8139.785599 | 7817.692304 | 8412.175934 | 3978.269607 | 8275.70024  | 4879.995823 |
| Q8BP92 | Rcn2     | Reticulocalbin-2                                                                                        | 252.901  | 27.81 | 37271  | 6  | 11939.881   | 12662.3283  | 9173.873831 | 13236.96799 | 10151.85931 | 11005.18596 | 13676.79328 | 12885.53314 | 11689.97146 | 15032.06903 | 10643.52792 | 15932.12312 | 16916.28036 | 11101.6966  | 14866.41567 |
| Q8BPU7 | Elmo1    | Engulfment and cell motility protein 1                                                                  | 416.403  | 28.61 | 83936  | 16 | 232907.6338 | 187308.2187 | 249314.6685 | 249498.618  | 245108.2838 | 150856.4966 | 160008.0327 | 137525.5195 | 154849.9323 | 140344.9525 | 176194.2239 | 166412.2172 | 187007.1917 | 180006.2188 | 183537.1326 |
| Q8BPX9 | Slc15a3  | Solute carrier family 15 member 3                                                                       | 90.052   | 4.84  | 6      |    |             |             |             |             |             |             |             |             |             |             |             |             |             |             |             |

|        |          |                                                       |          |       |        |    |             |             |             |             |             |             |             |             |             |             |             |             |             |             |              |
|--------|----------|-------------------------------------------------------|----------|-------|--------|----|-------------|-------------|-------------|-------------|-------------|-------------|-------------|-------------|-------------|-------------|-------------|-------------|-------------|-------------|--------------|
| Q8BSY0 | Asph     | Aspartyl/asparaginyl beta-hydroxylase                 | 677.992  | 35.76 | 83042  | 22 | 480257.1503 | 484722.2683 | 459677.9228 | 463956.6043 | 439473.0795 | 470617.9319 | 478243.7199 | 467542.5188 | 499507.2163 | 504799.186  | 522261.1298 | 494961.781  | 540314.5477 | 496406.4341 | 499874.324   |
| Q8BT60 | Cpne3    | Copine-3                                              | 129.342  | 10.32 | 59585  | 4  | 31486.07843 | 29807.12537 | 31138.30135 | 32155.7167  | 30938.69258 | 32161.32387 | 34731.88936 | 35564.3519  | 31265.88745 | 35330.34388 | 28783.76536 | 31987.82212 | 29810.55934 | 35706.43385 | 33459.23232  |
| Q8BTi8 | Srrm2    | Serine/arginine repetitive matrix protein 2           | 362.852  | 6.4   | 294840 | 11 | 81824.62641 | 108723.8145 | 82488.25377 | 80198.53164 | 99899.01373 | 10121.2989  | 8460.210529 | 9875.917237 | 7268.343001 | 11369.44387 | 43393.58736 | 55118.75671 | 47630.34488 | 42965.90501 | 67847.39514  |
| Q8BTM8 | Flna     | Flamin-A                                              | 2308.771 | 33.81 | 281222 | 61 | 804175.7509 | 812288.0927 | 848734.9608 | 834253.12   | 744851.9647 | 576862.8925 | 878827.3799 | 835535.712  | 675974.9803 | 584159.048  | 838075.0381 | 951888.6277 | 780076.9994 | 817627.2077 | 873837.251   |
| Q8BTX9 | Hsd1l    | Inactive hydroxysteroid dehydrogenase-like protein 1  | 95.987   | 11.52 | 36868  | 2  | 11965.95128 | 14214.86294 | 92983.26347 | 10454.35312 | 10478.02597 | 12360.26531 | 9975.960225 | 12604.14433 | 4812.527531 | 11702.84482 | 18752.6553  | 12822.32961 | 11055.53563 | 12725.12225 | 11600.53979  |
| Q8BTY2 | Slc4a7   | Sodium bicarbonate cotransporter 3                    | 98.025   | 3.87  | 116514 | 3  | 11727.26005 | 16816.78958 | 11019.89503 | 10846.65739 | 14228.13664 | 13561.37815 | 16087.22777 | 15873.6156  | 16712.6553  | 15692.58046 | 13927.7611  | 10914.11941 | 12741.94177 | 16274.28008 | 17004.0377   |
| Q8BU30 | Iars     | Isoleucine--tRNA ligase, cytoplasmic                  | 642.093  | 25.28 | 144271 | 24 | 217169.3874 | 248689.6245 | 265762.8886 | 254904.415  | 238075.691  | 251909.4839 | 281386.3463 | 277106.123  | 269037.1047 | 261698.8217 | 247139.6776 | 281649.8985 | 257170.0497 | 244012.3801 | 260894.9862  |
| Q8BUM3 | Ptpn7    | Tyrosine-protein phosphatase non-receptor type 7      | 193.124  | 21.73 | 40351  | 5  | 63894.37018 | 62880.6585  | 54646.19204 | 55511.87409 | 58366.47397 | 36566.29059 | 44942.40731 | 37095.65284 | 39410.35908 | 43901.36467 | 55174.29986 | 53352.74648 | 44441.78412 | 54076.86291 | 54465.5702   |
| Q8BUR4 | Dock1    | Dedicator of cytokinesis protein 1                    | 77.53    | 1.88  | 215085 | 3  | 7462.321637 | 8096.330761 | 7483.886607 | 6717.119215 | 7549.481741 | 5507.214382 | 6892.118677 | 4882.161074 | 5265.260682 | 8191.849148 | 5986.11469  | 5703.726325 | 6900.10136  | 6971.616019 | 6237.176731  |
| Q8BUV8 | Gpr107   | Protein GPR107                                        | 32.332   | 3.99  | 62056  | 2  | 10100.11868 | 2908.921013 | 11035.44374 | 7479.083165 | 10275.99701 | 10804.53498 | 4230.308212 | 7064.881552 | 7675.632467 | 9937.833473 | 9217.29882  | 8507.332126 | 6920.537675 | 0.00945634  | 3532.498018  |
| Q8BV13 | Cops7b   | COP9 signalosome complex subunit 7b                   | 92.903   | 14.02 | 29689  | 2  | 5849.850913 | 4558.171387 | 2800.757471 | 4620.614095 | 4414.422799 | 3499.648152 | 3505.548915 | 4401.512512 | 4170.361191 | 3659.934876 | 5191.25001  | 4338.553181 | 4178.890576 | 3542.055216 | 3515.59562   |
| Q8BV66 | Ifi44    | Interferon-induced protein 44                         | 59.537   | 5.92  | 47852  | 2  | 3572.228534 | 4207.632131 | 5088.488179 | 4626.646663 | 4190.974149 | 10169.55373 | 5064.824698 | 9368.21027  | 5549.840333 | 5386.793078 | 4738.593575 | 3919.878875 | 4023.411801 | 4855.695635 | 4584.264826  |
| Q8BEV3 | Atp6v1h  | V-type proton ATPase subunit H                        | 372.601  | 27.33 | 55855  | 11 | 128749.5928 | 142445.8513 | 131438.2525 | 126796.3865 | 135440.9838 | 108941.7444 | 138863.8887 | 124760.9279 | 134126.09   | 118371.7191 | 122452.7984 | 133011.5869 | 117452.044  | 133413.6609 | 99107.83883  |
| Q8BVF2 | Pdcl3    | Phoduculin-like protein 3                             | 109.738  | 18.33 | 27581  | 3  | 16846.92807 | 16617.94342 | 17206.7549  | 16236.03925 | 15540.33762 | 14831.25515 | 19073.50094 | 15737.40257 | 15476.09683 | 11492.25933 | 10976.87103 | 12202.28297 | 14219.17479 | 14807.89023 | 14270.13484  |
| Q8BVG4 | Dpp9     | Dipeptidyl peptidase 9                                | 46.733   | 3.48  | 98001  | 2  | 12508.90175 | 6206.130508 | 11395.38698 | 11554.48317 | 8387.540151 | 8803.40145  | 9959.325287 | 10427.42706 | 12222.27939 | 9868.876531 | 10747.9765  | 11388.23114 | 9489.630202 | 10859.58593 | 10864.96634  |
| Q8BVI4 | Qdpr     | Dihydropyridine reductase                             | 216.144  | 31.12 | 25570  | 5  | 56962.94296 | 60012.16994 | 49511.25505 | 58479.56069 | 62965.0606  | 46162.98714 | 44529.02979 | 50815.45458 | 44626.53366 | 47213.1028  | 48603.19428 | 47786.63744 | 45325.77896 | 52407.27996 | 54345.51887  |
| Q8BVI5 | Stx16    | Syntaxin-16                                           | 113.23   | 12.58 | 37080  | 3  | 12142.84937 | 7525.252103 | 10812.5396  | 14031.13627 | 9273.402048 | 9581.609682 | 6966.244221 | 10492.55235 | 11246.08673 | 11467.57369 | 6775.890532 | 7870.22436  | 12329.42328 | 11675.73187 | 12017.53679  |
| Q8BVK9 | Sp110    | Sp110 nuclear body protein                            | 177.181  | 17.98 | 50140  | 5  | 36975.71971 | 35942.57373 | 29376.33475 | 39674.86383 | 32650.75654 | 39294.41133 | 35841.11266 | 39928.40816 | 40683.79097 | 25818.28185 | 30740.48997 | 27967.06148 | 26316.84095 | 30785.96466 | 36615.94249  |
| Q8BVY0 | Rsl1d1   | Ribosomal L1 domain-containing protein 1              | 153.633  | 11.06 | 50421  | 5  | 31353.82569 | 30332.05768 | 35595.4698  | 31837.64193 | 43307.36689 | 41517.76794 | 50188.49024 | 40675.521   | 30388.0517  | 33582.63266 | 36749.78447 | 31212.54727 | 31205.27294 | 30813.79836 |              |
| Q8BWT1 | Acaa2    | 3-ketoacyl-CoA thiolase, mitochondrial                | 15.445   | 7.05  | 41830  | 2  | 18602.9031  | 17837.99551 | 17389.89808 | 18753.18965 | 18712.06341 | 23943.71276 | 15594.51131 | 7523.997578 | 17437.25167 | 8033.848421 | 20911.16328 | 14351.39973 | 8761.672123 | 16970.77259 | 17207.29094  |
| Q8BX70 | Vps13c   | Vacuolar protein sorting-associated protein 13C       | 977.048  | 13.18 | 420089 | 31 | 179066.7132 | 196490.6853 | 170489.9678 | 193807.5314 | 179382.8685 | 162483.1891 | 187353.2347 | 179852.6708 | 171987.4132 | 169238.0364 | 187077.346  | 191485.4053 | 191589.4006 | 192848.571  | 180419.0409  |
| Q8BXQ2 | Pigt     | GPI transamidase component PIG-T                      | 62.931   | 7.73  | 65705  | 3  | 8360.266242 | 13464.34801 | 11195.71438 | 9932.810797 | 14057.13049 | 15707.7179  | 14156.25829 | 17133.45037 | 20714.29339 | 12388.54806 | 9170.273525 | 8999.706485 | 13253.25072 | 14468.5944  | 14180.43694  |
| Q8BY71 | Hat1     | Histone acetyltransferase type B catalytic subunit    | 107.581  | 11.06 | 49278  | 3  | 10006.67883 | 15097.9111  | 16200.61752 | 14993.57711 | 10792.81157 | 13267.38159 | 15127.96589 | 15978.55309 | 11676.44712 | 11332.27722 | 9823.66201  | 10262.51339 | 9812.808039 | 8874.736895 | 11871.03273  |
| Q8BY87 | Usp47    | Ubiquitin carboxyl-terminal hydrolase 47              | 77.855   | 2.69  | 157455 | 3  | 6372.045312 | 11247.22544 | 7345.607652 | 6539.839489 | 6884.774429 | 8539.613139 | 8225.165783 | 8863.288352 | 9779.489809 | 9420.295926 | 8878.955875 | 8400.334241 | 9384.440144 | 8473.063503 | 8455.058939  |
| Q8BYA0 | Tbod     | Tubulin-specific chaperone D                          | 47.165   | 1.59  | 133321 | 2  | 15775.72964 | 14036.13092 | 15547.46212 | 15248.39737 | 16598.22394 | 18395.03451 | 18532.76435 | 18765.0438  | 19571.33639 | 16063.54934 | 13423.50398 | 17375.57394 | 19198.19868 | 17049.11127 | 14937.39488  |
| Q8BYI6 | Lpcat2   | Lysophosphatidylcholine acyltransferase 2             | 90.418   | 10.11 | 60254  | 4  | 16611.11605 | 15025.58226 | 12963.58664 | 11406.71377 | 12327.41168 | 25032.64559 | 19287.8936  | 24274.51422 | 23350.63768 | 19004.62829 | 9663.025275 | 16344.89297 | 18562.72283 | 16340.95792 | 17861.48261  |
| Q8BYK6 | Ythd3    | YTH domain-containing family protein 3                | 97.025   | 4.96  | 63961  | 2  | 5112.996463 | 7078.953796 | 6209.531515 | 7292.584737 | 5046.775473 | 4176.395192 | 6831.918322 | 6402.618085 | 6559.091267 | 5142.461289 | 6702.943168 | 6429.111417 | 6702.706883 | 5549.15682  | 6520.834578  |
| Q8BYW1 | Arhgap25 | Rho GTPase-activating protein 25                      | 346.993  | 21.91 | 73383  | 10 | 113991.3251 | 138791.1626 | 133020.0656 | 138527.6404 | 131914.322  | 100956.6102 | 116711.9363 | 118620.4769 | 105251.3628 | 110655.3215 | 116493.5628 | 122727.6805 | 108736.6341 | 121781.3798 | 126766.3075  |
| Q8BZA9 | Tigar    | Fructose-2,6-bisphosphatase TIGAR                     | 88.892   | 19.33 | 29191  | 3  | 12274.22497 | 5954.554923 | 8809.599438 | 10888.26669 | 9856.405478 | 8764.852807 | 11348.90216 | 14520.44368 | 9237.634491 | 11096.67142 | 10753.16644 | 10716.58503 | 11162.16783 | 8809.073255 | 12178.76301  |
| Q8BZN6 | Dock10   | Dedicator of cytokinesis protein 10                   | 425.27   | 10.65 | 245758 | 14 | 98845.32553 | 90304.49234 | 69947.18934 | 98145.36347 | 97151.68193 | 103445.315  | 138035.2567 | 126679.5923 | 94245.12528 | 108268.8369 | 68699.86665 | 79956.81189 | 87527.23364 | 76970.74621 | 108129.9383  |
| Q8BZW8 | Nhlrc2   | NHL repeat-containing protein 2                       | 86.826   | 3.17  | 78430  | 2  | 1796.244094 | 4968.761404 | 5005.347726 | 3973.260556 | 5766.511171 | 6155.591728 | 7113.333873 | 6665.634829 | 6832.963467 | 5503.957043 | 5746.369568 | 6281.784854 | 6978.433416 | 6312.818277 | 6723.519916  |
| Q8C0S2 | Mapts    | Microtubule-associated protein 1S                     | 332.994  | 17.37 | 102939 | 10 | 89470.88171 | 84768.6528  | 76889.53712 | 80509.29449 | 55628.0073  | 45890.1587  | 66700.53598 | 63872.63659 | 61507.3514  | 68838.93907 | 76419.10395 | 17860.86653 | 81805.9887  | 63174.98692 | 77919.81292  |
| Q8C0C7 | Farsa    | Phenylalanine--tRNA ligase alpha subunit              | 361.809  | 27.76 | 57599  | 11 | 119070.1329 | 130570.9378 | 119459.0297 | 132227.1564 | 123444.8915 | 114259.6199 | 121057.105  | 122404.0516 | 113574.0372 | 114508.8916 | 128223.0691 | 13607.8946  | 118191.9379 | 119364.5096 | 1421281.8552 |
| Q8C0D5 | Efl1     | Elongation factor-like GTPase 1                       | 45.671   | 2.93  | 125777 | 2  | 3943.704377 | 6063.93154  | 3629.571171 | 4288.703279 | 4774.835409 | 2789.73314  | 4505.319535 | 3528.768077 | 0.012083387 | 3994.953028 | 4236.445094 | 4365.880035 | 5228.632609 | 0.00945634  | 4732.133562  |
| Q8C0E2 | Vps26b   | Vacuolar protein sorting-associated protein 26B       | 88.309   | 10.71 | 39125  | 3  | 21841.89719 | 25064.00093 | 22798.3296  | 25592.54248 | 24848.70942 | 13809.80247 | 26845.5302  | 22459.02373 | 14183.30131 | 16015.12879 | 21247.60827 | 12719.23166 | 19311.77642 | 26234.52439 | 14213.38177  |
| Q8C0I1 | Agps     | Alkylidihydroxyacetonephosphate synthase, peroxisomal | 293.425  | 19.38 | 71684  | 8  | 49446.40397 | 44764.85765 | 48454.494   | 31381.21929 | 40416.20658 | 52128.65593 | 48327.49451 | 48709.07915 | 53675.90294 | 52998.06996 | 39843.22887 | 46105.27995 | 45879.33416 | 48476.67202 | 44050.73547  |
| Q8C0L0 | Tmx4     | Thioredoxin-related transmembrane protein 4           | 117.178  | 12.54 | 37131  | 3  | 37555.40077 | 37215.73289 | 33991.07213 | 33068.67484 | 34747.00937 | 37654.75815 | 37079.41146 | 35258.35556 | 38340.40235 | 39071.60809 | 33713.35281 | 34239.61763 | 35040.24237 | 37526.89743 | 34553.9787   |
| Q8C0L6 | Paox     | Peroxisomal N(1)-acetyl-spermine/spermidine oxidase   | 163.299  | 11.31 | 55447  | 5  | 32476.06647 | 20494.72886 | 21502.57957 | 30796.70817 | 26682.78159 | 16184.81052 | 20177.39741 | 17761.37071 | 16036.99708 | 26473.95973 | 20767.05992 | 18771.33429 | 30773.10577 | 21106.63984 | 19801.80475  |
| Q8C0M9 | Asrg1    | Isoaspartyl peptidase/L-asparaginase                  | 45.474   | 7.06  | 33950  | 2  | 10337.42275 | 7778.187494 | 16831.55061 | 12975.44251 | 8863.186067 | 11170.01734 | 7569.466439 | 11093.03235 | 6820.475286 | 8438.688062 | 13197.97286 | 10821.99791 | 11949.06962 | 13245.14264 | 10476.85799  |
| Q8C129 | Lnpep    | Leucyl-cystinyl aminopeptidase                        | 354.035  | 14.54 | 117304 | 11 | 9355        |             |             |             |             |             |             |             |             |             |             |             |             |             |              |



|        |        |                                                                                 |          |       |        |    |             |             |             |             |             |             |             |             |             |             |             |             |             |             |             |
|--------|--------|---------------------------------------------------------------------------------|----------|-------|--------|----|-------------|-------------|-------------|-------------|-------------|-------------|-------------|-------------|-------------|-------------|-------------|-------------|-------------|-------------|-------------|
| Q8C7X2 | Emc1   | ER membrane protein complex subunit 1                                           | 364.763  | 14.54 | 111605 | 8  | 41762.57489 | 49706.84337 | 38504.94019 | 38023.81755 | 35304.3597  | 41766.90059 | 46596.45763 | 48784.00995 | 49812.88342 | 48790.42938 | 38829.24708 | 44937.56303 | 46021.93581 | 41926.97481 | 32828.0084  |
| Q8C854 | Myef2  | Myelin expression factor 2                                                      | 124.366  | 5.25  | 63295  | 3  | 35245.42525 | 29242.02008 | 39434.75572 | 43490.87751 | 21701.89692 | 41486.31154 | 38401.44836 | 25621.06062 | 43403.80063 | 41032.49944 | 43924.86437 | 43974.93642 | 44081.55159 | 27763.71852 | 40921.87928 |
| Q8CB78 | Uba3   | NEDD8-activating enzyme E1 catalytic subunit                                    | 227.269  | 24.89 | 51737  | 6  | 24164.72019 | 26397.65941 | 19269.14692 | 24573.08031 | 19580.93951 | 15599.75989 | 22660.52737 | 17721.86749 | 19871.56626 | 12904.37476 | 17656.81048 | 19259.72576 | 17254.24549 | 19860.56851 | 19069.69109 |
| Q8C9B9 | Dido1  | Death-inducer obliterator 1                                                     | 38.162   | 1.37  | 247176 | 2  | 4975.462912 | 4326.181996 | 4762.192212 | 4129.429823 | 4468.212876 | 3361.280587 | 3090.552943 | 3825.319269 | 3473.452999 | 4075.00562  | 4378.258273 | 3944.537309 | 3629.190055 | 4008.630728 | 3564.919647 |
| Q8CAQ8 | Immt   | MICOS complex subunit Mic60                                                     | 1043.474 | 46.63 | 83900  | 27 | 481437.4978 | 491525.5687 | 488323.2017 | 419938.0948 | 505033.7727 | 505375.6423 | 422914.0602 | 510318.6122 | 428165.6434 | 457220.3308 | 452381.1187 | 492024.3268 | 497225.8898 | 435930.5324 | 484290.434  |
| Q8CAY6 | Acat2  | Acetyl-CoA acetyltransferase, cytosolic                                         | 257.487  | 40.81 | 41298  | 9  | 93500.20656 | 109389.6852 | 90993.06806 | 103933.0727 | 88033.15005 | 98131.91247 | 79859.53304 | 70184.27166 | 77221.73565 | 65675.99409 | 104918.3921 | 96491.68897 | 70265.6687  | 81983.64639 | 80752.56322 |
| Q8CB77 | Eloa   | Elongin-A                                                                       | 63.24    | 5.43  | 87161  | 2  | 3796.457376 | 2843.464297 | 3062.749183 | 3403.74763  | 2576.254889 | 1944.061838 | 2410.637501 | 2815.294284 | 2300.374056 | 2586.979501 | 1972.011798 | 2859.213908 | 2325.331565 | 2643.2186   | 2602.265994 |
| Q8CB96 | Rassf4 | Ras association domain-containing protein 4                                     | 123.874  | 20.19 | 36934  | 5  | 25779.87887 | 29372.52658 | 26926.05697 | 27631.28341 | 31010.66754 | 24150.92853 | 30588.04708 | 21405.46216 | 33566.85432 | 27526.69573 | 28955.66105 | 29379.32624 | 28446.41961 | 30795.81344 | 30031.45222 |
| Q8CBW3 | Abi1   | Abi interactor 1                                                                | 106.175  | 17.88 | 52288  | 7  | 70652.89284 | 58943.02586 | 65984.0155  | 64882.6189  | 59357.26115 | 53309.52392 | 64785.34321 | 49272.54596 | 61756.70418 | 56933.709   | 58107.15992 | 60176.92666 | 55191.04834 | 68672.30229 | 61152.53017 |
| Q8CBY8 | Dctn4  | Dynactin subunit 4                                                              | 67.87    | 9.64  | 53057  | 4  | 13486.08653 | 14744.38991 | 21786.76919 | 22000.57427 | 14822.61102 | 19206.94781 | 17925.00641 | 15980.07712 | 14881.59571 | 18357.89825 | 12508.57262 | 13170.3133  | 15453.47529 | 14268.93797 | 19250.73808 |
| Q8CCB4 | Vps53  | Vacuolar protein sorting-associated protein 53 homolog                          | 65.219   | 5.41  | 94423  | 2  | 2392.726291 | 2238.147974 | 1940.457671 | 2649.843934 | 1555.008637 | 993.9566094 | 2036.120815 | 2334.795001 | 1853.713894 | 1498.035773 | 2569.87495  | 1938.047581 | 1985.42433  | 1727.107331 | 1558.802231 |
| Q8CCF0 | Prpf31 | U4/U6 small nuclear ribonucleoprotein Prp31                                     | 53.378   | 7.62  | 55430  | 2  | 11683.99569 | 10649.26334 | 11920.50442 | 13300.65901 | 11516.61461 | 8142.350342 | 5141.173708 | 6854.789195 | 6777.48181  | 5636.179012 | 15772.57005 | 10735.01861 | 14850.0306  | 10521.51825 | 13716.10379 |
| Q8CCH2 | Nhlrc3 | NHL repeat-containing protein 3                                                 | 234.33   | 30.55 | 38195  | 6  | 49770.50513 | 36033.57228 | 39758.81567 | 41520.31916 | 42374.95477 | 29333.70364 | 30735.9818  | 29822.28322 | 36820.12801 | 32224.54916 | 39257.98854 | 37112.74107 | 41728.58999 | 46839.30209 | 42283.05672 |
| Q8CCJ3 | Ufl1   | E3 UFM1-protein ligase 1                                                        | 95.437   | 6.81  | 89520  | 3  | 8912.985486 | 3505.601737 | 3652.139061 | 8608.982622 | 6040.23199  | 7353.353651 | 8685.367172 | 7160.168015 | 8432.621856 | 6639.420525 | 4964.570265 | 5554.531722 | 6308.026445 | 6266.231052 | 4028.980839 |
| Q8CDG3 | Vcplp1 | Deubiquitinating protein VCIP135                                                | 106.969  | 6.07  | 134503 | 6  | 30471.78157 | 26814.84953 | 25533.50073 | 33277.59946 | 29713.5559  | 19421.03182 | 33518.41407 | 31517.57165 | 24704.6567  | 19770.98859 | 34957.32545 | 28868.37791 | 33187.61792 | 19660.72177 | 22123.27108 |
| Q8CDM1 | Atad2  | ATPase family AAA domain-containing protein 2                                   | 65.863   | 3.65  | 117943 | 2  | 3150.17895  | 2885.313987 | 2017.524377 | 3048.528133 | 2729.052639 | 1286.524054 | 2015.041785 | 2260.822155 | 3012.101373 | 1932.282125 | 2460.667155 | 3104.849733 | 2054.485513 | 2046.485462 | 2160.977309 |
| Q8CDN6 | Txnl1  | Thioredoxin-like protein 1                                                      | 250.07   | 38.75 | 32237  | 6  | 73634.28129 | 75743.27265 | 72967.60436 | 71121.29425 | 65886.3474  | 67711.40244 | 67856.55073 | 11738.85656 | 64627.14294 | 66832.12637 | 68333.36022 | 76110.94273 | 71538.52629 | 63932       | 73206.86975 |
| Q8CFE2 | Hpf1   | Histone PARYlation factor 1                                                     | 88.835   | 12.14 | 39291  | 3  | 13190.88449 | 13329.27192 | 12784.99395 | 15610.56425 | 12019.98062 | 12715.27705 | 13024.12394 | 13760.03336 | 12184.66096 | 12157.0436  | 12378.06545 | 13705.18115 | 12989.76828 | 13865.24976 |             |
| Q8CFE4 | Scyl2  | SCY1-like protein 2                                                             | 56.996   | 2.69  | 103317 | 2  | 5421.266533 | 4996.217699 | 4000.980379 | 5119.617283 | 4885.090065 | 3597.500348 | 5679.37269  | 3536.665944 | 5834.853415 | 4829.068927 | 4838.881147 | 5777.92656  | 5002.508521 | 4706.923772 | 5627.662386 |
| Q8CFI7 | Polr2b | DNA-directed RNA polymerase II subunit RPB2                                     | 67.151   | 5.79  | 133911 | 5  | 26750.11754 | 38256.11332 | 36910.52407 | 35538.98268 | 37814.58534 | 25388.79435 | 39863.43669 | 37545.46674 | 41170.55813 | 41075.42041 | 20106.87925 | 34043.2471  | 25657.81851 | 26046.21557 | 31964.02994 |
| Q8CFQ3 | Aqr    | RNA helicase aquarius                                                           | 80.653   | 5.33  | 170294 | 5  | 21534.96027 | 23163.42974 | 14724.18381 | 21601.24149 | 22274.49776 | 23785.40342 | 16135.91626 | 22121.73794 | 24210.21659 | 20589.04621 | 23394.56435 | 16835.51137 | 22685.93936 | 22614.25933 | 20232.33705 |
| Q8CG47 | Smc4   | Structural maintenance of chromosomes protein 4                                 | 385.276  | 15.86 | 146895 | 15 | 92887.97801 | 81180.65711 | 103219.9309 | 95833.41995 | 96912.34398 | 106834.3605 | 84532.6834  | 82413.93899 | 100586.5713 | 77075.04374 | 97105.42206 | 92528.76508 | 95447.35527 | 71735.94355 | 82420.31575 |
| Q8CG48 | Smc2   | Structural maintenance of chromosomes protein 2                                 | 249.947  | 12.51 | 134239 | 11 | 76598.59187 | 90402.48613 | 97341.21375 | 94576.0433  | 88502.13009 | 88372.45741 | 90005.21224 | 82956.04254 | 85284.67764 | 85037.56509 | 77478.36698 | 91183.46896 | 80597.28297 | 81318.32671 | 80996.54585 |
| Q8CGC7 | Eprs   | Bifunctional glutamate/proline-tRNA ligase                                      | 1682.65  | 42.59 | 170079 | 42 | 705488.4204 | 728477.288  | 674987.8558 | 715873.7615 | 663928.4783 | 634408.627  | 729055.3554 | 710017.9081 | 700355.2433 | 636271.3489 | 660623.1989 | 726250.2954 | 672309.4778 | 692471.4939 | 683860.6946 |
| Q8CGK3 | Lonp1  | Lon protease homolog, mitochondrial                                             | 813.421  | 32.67 | 105843 | 22 | 248898.478  | 262492.3339 | 224424.1523 | 236142.6481 | 223917.9113 | 266883.1509 | 278136.8453 | 262308.0962 | 302842.9895 | 268949.8786 | 264337.0032 | 268954.6593 | 262685.7528 | 259069.2747 | 263356.9113 |
| Q8CGY8 | Ogt    | UDP-N-acetylglucosamine-peptide N-acetylglucosaminyltransferase 110 kDa subunit | 158.065  | 6.41  | 116952 | 5  | 30531.53355 | 28732.48342 | 29969.81779 | 31105.87983 | 27555.78855 | 24966.76395 | 17114.38311 | 26583.14926 | 7882.753801 | 24896.23521 | 21839.1932  | 29207.08397 | 29397.04741 | 29784.55721 | 28539.78792 |
| Q8CH18 | Ccar1  | Cell division cycle and apoptosis regulator protein 1                           | 127.484  | 5.06  | 132060 | 4  | 26007.32882 | 26339.03745 | 16194.45271 | 24657.13806 | 33514.59046 | 23589.31242 | 21607.05589 | 23626.0438  | 22049.29316 | 20925.85379 | 28538.85645 | 26199.9191  | 23349.25682 | 20511.77934 | 25355.99303 |
| Q8CHH9 | Sept8  | Septin-8                                                                        | 122.925  | 14.45 | 49812  | 5  | 58332.72996 | 49967.51606 | 38389.39231 | 59642.84182 | 55560.4959  | 57505.28474 | 67949.38038 | 56730.441   | 60270.65905 | 43425.98052 | 60891.20947 | 54798.96653 | 63182.93685 | 65589.49302 | 60253.74331 |
| Q8CHP8 | Pgp    | Glycerol-3-phosphate phosphatase                                                | 163.498  | 22.43 | 34541  | 4  | 19190.3128  | 20113.15584 | 16460.03142 | 19919.89848 | 13977.75758 | 9260.0602   | 10772.09185 | 9005.213889 | 14682.17602 | 9588.825462 | 16258.00459 | 15882.96312 | 12052.28633 | 16767.54403 | 16145.28219 |
| Q8CHT3 | Ints5  | Integrator complex subunit 5                                                    | 99.327   | 7.37  | 108348 | 3  | 6696.944919 | 4245.816658 | 5357.119573 | 7016.407315 | 5818.471393 | 6349.455454 | 6216.912634 | 4701.299087 | 5742.06847  | 7202.151801 | 2333.304141 | 6101.851339 | 6195.86589  | 8283.855718 | 4248.819815 |
| Q8CI43 | Myf6b  | Myosin light chain 6B                                                           | 57.825   | 11.59 | 22749  | 2  | 340752.5208 | 302173.6903 | 303930.3102 | 296447.6986 | 267333.0955 | 270012.8137 | 245476.5391 | 209171.5944 | 239148.2189 | 216633.4725 | 333381.6027 | 287068.4528 | 290002.201  | 247703.4542 | 258333.4768 |
| Q8CI51 | Pdim5  | PDZ and LIM domain protein 5                                                    | 229.892  | 18.95 | 63299  | 7  | 45987.68241 | 46746.27484 | 42550.94646 | 40912.71979 | 41676.39464 | 38788.33181 | 40958.79883 | 35517.37782 | 32010.47179 | 44257.86615 | 43210.35829 | 34590.09348 | 40233.50479 | 42001.661   | 41646.55416 |
| Q8CI75 | Dis3l2 | DIS3-like exonuclease 2                                                         | 36.81    | 2.07  | 97775  | 2  | 11905.50931 | 7060.283099 | 13229.22716 | 13411.50326 | 13429.73526 | 7083.213797 | 8868.153917 | 0.01388636  | 11823.38111 | 6677.338102 | 39293.91838 | 5636.141258 | 0.00981159  | 13781.27572 | 5355.796351 |
| Q8CI94 | Pygb   | Glycogen phosphorylase, brain form                                              | 767.631  | 34.4  | 96730  | 24 | 291358.1484 | 293755.8444 | 275524.952  | 273095.6476 | 286909.4598 | 232596.4282 | 267607.499  | 239850.3257 | 254111.9469 | 243516.2072 | 283694.3101 | 270323.7938 | 297614.8569 | 294293.6101 | 275057.9658 |
| Q8CIE6 | Copa   | Coatomeer subunit alpha                                                         | 1273.274 | 38.24 | 138432 | 36 | 444278.3514 | 423586.762  | 450995.9388 | 421138.4822 | 399999.6355 | 454192.4659 | 484314.2297 | 480355.9627 | 486027.3282 | 415226.3636 | 458454.7181 | 437098.3065 | 441118.6646 | 447207.2552 | 431858.4789 |
| Q8CIG8 | Prmt5  | Protein arginine N-methyltransferase 5                                          | 46.897   | 5.81  | 72680  | 3  | 16539.53665 | 15212.29642 | 14578.54893 | 15120.16929 | 14088.48806 | 13469.59472 | 15199.7877  | 17769.17311 | 20514.82386 | 12962.0878  | 12542.62104 | 13256.25442 | 15450.19086 | 15230.4444  | 18282.82133 |
| Q8CIH5 | Plcg2  | 1-phosphatidylinositol 4,5-bisphosphate phosphodiesterase gamma-2               | 681.111  | 21.5  | 147592 | 18 | 144835.7144 | 143675.1673 | 149416.2189 | 160784.6066 | 135914.2869 | 127899.7527 | 138452.7586 | 135206.2197 | 141791.6335 | 131454.5803 | 136229.1963 | 136820.684  | 141946.9144 | 135632.7423 | 144404.9687 |
| Q8CIM5 | Gpr84  | G-protein coupled receptor 84                                                   | 233.413  | 22.22 | 43717  | 6  | 28255.63973 | 35677.23882 | 34779.64162 | 32140.74716 | 29542.90724 | 64560.18444 | 70997.71852 | 62114.65125 | 64772.64504 | 51321.33816 | 21871.47947 | 36214.06028 | 28629.42539 | 33355.66821 | 30574.21631 |
| Q8CIM8 | Int9   | Integrator complex subunit 9                                                    | 63.958   | 2.9   | 106193 | 2  | 4918.46317  | 4251.686076 | 4071.796598 | 4395.067996 | 3694.482322 | 2758.394856 | 3429.882387 | 4149.235546 | 4103.950171 | 3482.139152 | 3669.681359 | 3548.431181 | 3923.23733  | 4130.194338 | 4097.633467 |
| Q8CIN4 | Pak2   | Serine/threonine-protein kinase PAK 2                                           | 429.749  | 35.5  | 57930  | 12 | 127795.5847 | 121085.498  | 128172.9938 | 119807.52   |             |             |             |             |             |             |             |             |             |             |             |

|        |          |                                                                          |          |       |        |    |             |             |             |             |             |             |             |             |             |             |             |              |             |             |             |
|--------|----------|--------------------------------------------------------------------------|----------|-------|--------|----|-------------|-------------|-------------|-------------|-------------|-------------|-------------|-------------|-------------|-------------|-------------|--------------|-------------|-------------|-------------|
| Q8K0F1 | Tbc1d23  | TBC1 domain family member 23                                             | 84.48    | 7.02  | 76426  | 2  | 2564.347965 | 2407.923261 | 2520.918354 | 2414.169223 | 1948.094287 | 1471.698505 | 165.4972135 | 2033.787953 | 1908.446381 | 1122.350224 | 1596.14626  | 1765.917127  | 1735.664023 | 1543.044267 | 1597.440421 |
| Q8K124 | Plekho2  | Pleckstrin homology domain-containing family O member 2                  | 332.694  | 29.9  | 53872  | 8  | 116519.4096 | 123039.6943 | 99286.47688 | 107105.3666 | 96257.58877 | 96932.19727 | 103673.059  | 102655.0655 | 75761.70001 | 94471.46759 | 113371.3343 | 108487.9963  | 111402.1194 | 98695.62734 | 109214.1559 |
| Q8K183 | Pdkx     | Pyridoxal kinase                                                         | 413.942  | 39.42 | 35015  | 9  | 149139.1243 | 139854.6803 | 126631.4172 | 145781.644  | 131010.8554 | 82294.545   | 109052.7459 | 97172.96685 | 88095.24322 | 90739.55748 | 138206.5981 | 131846.4014  | 131445.1181 | 125331.9894 | 126466.4356 |
| Q8K1B8 | Fermt3   | Fermitin family homolog 3                                                | 1135.748 | 60.6  | 75635  | 31 | 571655.7503 | 601277.3953 | 574280.2264 | 615803.1541 | 588158.1267 | 551190.2013 | 597237.222  | 596810.6396 | 571924.839  | 555531.9417 | 580120.6892 | 595209.2113  | 569096.2588 | 595136.6716 | 577521.3368 |
| Q8K1J6 | Trmt1    | CCA tRNA nucleotidyltransferase 1, mitochondrial                         | 174.989  | 18.89 | 49895  | 6  | 175615.3871 | 119279.1016 | 193650.687  | 144945.1385 | 139059.4628 | 157519.1707 | 242321.9485 | 251072.2539 | 159751.4252 | 199445.9159 | 159922.4297 | 141381.634   | 153164.0835 | 180107.9879 | 139749.5776 |
| Q8K1R7 | Nek9     | Serine/threonine-protein kinase Nek9                                     | 167.947  | 5.39  | 107143 | 4  | 28379.5448  | 30614.05404 | 25944.93067 | 25521.93415 | 25090.90115 | 24278.31171 | 28502.35893 | 32237.55162 | 29385.12943 | 28554.02513 | 27110.03941 | 28046.85732  | 27359.23655 | 27421.3943  | 31378.90987 |
| Q8K1X4 | Nckap1l  | Nck-associated protein 1-like                                            | 570.387  | 23.99 | 128905 | 18 | 193126.2936 | 164077.0675 | 154525.5457 | 154760.8423 | 168936.3603 | 144134.2385 | 153657.7435 | 146816.4244 | 161752.4945 | 180101.1416 | 186674.5744 | 164305.4857  | 167446.6878 | 171878.8164 | 139940.8309 |
| Q8K212 | Pacs1    | Phosphofurin acidic cluster sorting protein 1                            | 36.415   | 2.08  | 104829 | 2  | 2829.423605 | 7100.939629 | 9248.395921 | 9413.054548 | 4475.088434 | 9421.422894 | 4392.460856 | 9615.753723 | 6016.108025 | 5926.225683 | 7784.432947 | 9546.076232  | 9082.238261 | 6605.043993 | 6687.718875 |
| Q8K224 | Nat10    | RNA cytidine acetyltransferase                                           | 109.584  | 5.47  | 115419 | 4  | 31258.39403 | 30224.56883 | 30517.58666 | 31820.39593 | 29815.29209 | 27793.36638 | 28841.32146 | 32186.98791 | 30013.77065 | 30485.82187 | 32518.12739 | 34627.13046  | 32931.71202 | 13973.61531 | 32009.94213 |
| Q8K297 | Colgalt1 | Procollagen galactosyltransferase 1                                      | 282.896  | 14.59 | 71061  | 9  | 74653.51602 | 84526.67818 | 86467.96403 | 89227.96924 | 81973.54805 | 109640.1055 | 105960.7621 | 109650.4233 | 117292.9774 | 102650.775  | 77090.94791 | 79822.3493   | 94144.31722 | 85230.55625 | 96635.62585 |
| Q8K2B3 | Sdha     | Succinate dehydrogenase [ubiquinone] flavoprotein subunit, mitochondrial | 743.411  | 50.15 | 72585  | 23 | 505170.7056 | 514538.7862 | 467933.9006 | 477511.0185 | 496186.1627 | 536133.134  | 508382.3936 | 496023.22   | 527624.2426 | 488495.4903 | 480231.2941 | 488730.3104  | 510738.5687 | 528135.2904 | 500478.0462 |
| Q8K2C9 | Hacd3    | Very-long-chain (3R)-3-hydroxyacyl-CoA dehydratase 3                     | 128.075  | 17.68 | 43131  | 4  | 21485.25264 | 21246.40652 | 18919.19028 | 14610.19288 | 20270.35141 | 22901.32183 | 23855.33331 | 22669.32396 | 25329.45843 | 22406.5291  | 19499.15521 | 20002.52379  | 21118.32688 | 19268.81796 | 14824.70722 |
| Q8K2L4 | Manba    | Beta-mannosidase                                                         | 232.516  | 13.54 | 100831 | 8  | 112359.434  | 61360.88897 | 103182.6996 | 78292.89553 | 96797.63039 | 57797.70919 | 40421.56302 | 33890.04923 | 58846.52919 | 64032.74257 | 64226.55552 | 80402.0075   | 77498.86128 | 82435.65943 | 92999.63763 |
| Q8K2K6 | Agfg1    | Art-GAP domain and FG repeat-containing protein 1                        | 163.311  | 18.72 | 58043  | 6  | 43169.74302 | 49913.48638 | 42428.08783 | 40372.41797 | 40912.9847  | 42935.27162 | 43163.85967 | 43909.08887 | 44802.12943 | 40878.73786 | 46548.82636 | 44557.54726  | 47099.12086 | 42198.95332 | 50079.16664 |
| Q8K2L8 | Trappc12 | Trafficking protein particle complex subunit 12                          | 43.084   | 3.51  | 87694  | 2  | 6412.963597 | 8517.984592 | 9435.564173 | 8377.677071 | 7608.811514 | 7123.66844  | 8427.782633 | 8212.825235 | 6783.752363 | 8766.266424 | 2265.750938 | 9046.388217  | 6803.492763 | 7657.619698 | 9091.983061 |
| Q8K2Q9 | Shtn1    | Shootin-1                                                                | 63.504   | 5.86  | 71343  | 4  | 53461.02425 | 32069.29347 | 46929.49315 | 46350.7211  | 45349.43651 | 45124.08575 | 44736.47798 | 43139.60751 | 34527.48056 | 48027.60226 | 57455.26706 | 42105.98251  | 48561.32252 | 54487.43827 | 42770.03256 |
| Q8K2T1 | Nmral1   | NmrA-like family domain-containing protein 1                             | 62.407   | 14.89 | 34376  | 4  | 14387.66204 | 19658.84749 | 20791.16642 | 18177.97115 | 18115.13821 | 11273.85513 | 14742.30761 | 13984.13859 | 16843.34716 | 14477.6279  | 20010.22364 | 18984.09602  | 17266.59092 | 17528.71081 | 16543.8526  |
| Q8K2V1 | Ppp4r1   | Serine/threonine-protein phosphatase 4 regulatory subunit 1              | 82.607   | 1.89  | 106298 | 2  | 4521.24737  | 4611.878718 | 3049.814173 | 3990.246311 | 2760.089906 | 2517.412729 | 2957.668297 | 4058.962892 | 2777.680103 | 3167.423096 | 6342.476589 | 3160.787881  | 4004.372705 | 3089.465961 | 3796.546498 |
| Q8K2V6 | Ipo11    | Importin-11                                                              | 82.276   | 3.9   | 112416 | 2  | 4661.637515 | 5932.551583 | 4698.223753 | 5116.928407 | 3721.570237 | 3307.327753 | 4656.129164 | 5974.403097 | 4549.278502 | 3815.2029   | 3301.52743  | 3577.156822  | 3830.329813 | 4205.184577 | 3434.764996 |
| Q8K2Z4 | Ncapd2   | Condensin complex subunit 1                                              | 476.331  | 15.52 | 155665 | 14 | 43685.21341 | 48197.05245 | 51325.62843 | 58559.34012 | 41950.95754 | 86048.05238 | 52915.98374 | 56644.07131 | 50146.53896 | 44165.19761 | 47036.43544 | 40285.01343  | 45388.8773  | 36376.77249 | 44388.45915 |
| Q8K310 | Matr3    | Matrin-3                                                                 | 360.405  | 18.32 | 94630  | 9  | 80427.07898 | 77580.63717 | 65754.09898 | 68606.07781 | 65263.88276 | 62371.55205 | 75626.12419 | 75860.89605 | 78663.38641 | 64259.23237 | 61352.61538 | 76516.21439  | 69170.50391 | 62905.08407 | 69917.46337 |
| Q8K337 | Inpp5b   | Type II inositol 1,4,5-trisphosphate 5-phosphatase                       | 68.502   | 3.12  | 112762 | 2  | 7373.446901 | 6318.45882  | 7115.769589 | 7942.064551 | 6307.079251 | 5693.751866 | 7039.195919 | 9185.333025 | 5453.666361 | 4475.773414 | 8303.80274  | 7620.722849  | 7074.322087 | 7500.377934 | 7679.959287 |
| Q8K363 | Ddx18    | ATP-dependent RNA helicase DDX18                                         | 179.236  | 14.24 | 74181  | 7  | 33917.9847  | 36834.2317  | 32499.24662 | 38881.49917 | 41197.15253 | 31981.78279 | 40409.59118 | 38325.66491 | 42313.57101 | 39258.74339 | 33913.77306 | 41534.66142  | 37201.73324 | 21110.75334 | 35903.09143 |
| Q8K385 | FRRS1    | Ferric-chelate reductase 1                                               | 71.809   | 4.9   | 66047  | 3  | 56996.97876 | 61699.80619 | 64644.43426 | 69214.64932 | 64456.36621 | 53864.42446 | 62475.70931 | 60589.71373 | 61189.81208 | 49192.97542 | 69310.54171 | 69994.56597  | 60841.75898 | 68258.39357 | 67667.57457 |
| Q8K3G9 | Appl2    | DCC-interacting protein 13-beta                                          | 215.632  | 25.23 | 73854  | 10 | 51863.70027 | 62890.45561 | 51895.09179 | 49758.16212 | 55630.99954 | 34938.909   | 45103.45611 | 37731.23152 | 34859.69817 | 40589.48667 | 55003.14041 | 46797.56846  | 47150.1166  | 48530.83321 | 47251.77268 |
| Q8K3H0 | Appl1    | DCC-interacting protein 13-alpha                                         | 49.011   | 5.09  | 79328  | 3  | 9384.907722 | 8601.382912 | 7083.875133 | 6636.68749  | 6123.418561 | 9336.014295 | 8655.609696 | 5374.201658 | 10518.10194 | 9520.898303 | 9313.587321 | 6164.762368  | 8437.788489 | 6516.896724 | 9131.926353 |
| Q8K411 | Pitrm1   | Presenquence protease, mitochondrial                                     | 259.001  | 16.89 | 117372 | 11 | 77759.59926 | 72832.43835 | 62780.66161 | 75758.73617 | 67601.10811 | 47146.34649 | 50959.30319 | 62133.36312 | 72672.98694 | 71057.67595 | 65555.82827 | 61618.29207  | 61523.43883 | 66607.77531 | 61947.37097 |
| Q8K482 | Emilin2  | EMILIN-2                                                                 | 48.044   | 3.72  | 117310 | 2  | 8384.750366 | 7328.319235 | 7349.226176 | 6917.575466 | 5991.987271 | 6070.020501 | 5601.898363 | 5559.177965 | 6369.449277 | 5251.723852 | 6820.887083 | 6530.434992  | 6846.758197 | 2755.49963  | 5471.89031  |
| Q8K4Q0 | Rptor    | Regulatory-associated protein of mTOR                                    | 79.476   | 2.17  | 149471 | 2  | 7377.323027 | 5411.639155 | 3216.056755 | 5605.488597 | 4798.043875 | 5600.259066 | 7012.852795 | 6057.934757 | 6287.270162 | 6556.0245   | 5491.17029  | 6302.9818146 | 5350.322671 | 7400.888713 | 5375.914001 |
| Q8K4Z5 | Sf3a1    | Splicing factor 3A subunit 1                                             | 441.401  | 30.21 | 88545  | 17 | 190245.4145 | 201180.4267 | 184943.2164 | 190131.588  | 191898.9825 | 191117.6374 | 185529.0316 | 196433.1507 | 171303.4452 | 174753.5661 | 190299.6962 | 208104.9306  | 198065.9527 | 185022.1261 | 191942.2071 |
| Q8QZT1 | Acat1    | Acetyl-CoA acetyltransferase, mitochondrial                              | 549.109  | 47.88 | 44816  | 11 | 258523.9978 | 263487.2151 | 238026.0161 | 237171.4075 | 242409.2329 | 226244.8186 | 211845.1488 | 191554.5671 | 218020.9969 | 214314.0684 | 242795.6564 | 208694.6785  | 226282.3985 | 229683.1887 | 219650.1054 |
| Q8QZY1 | Eif3l    | Eukaryotic translation initiation factor 3 subunit L                     | 688.491  | 35.64 | 66613  | 16 | 136555.2169 | 144630.5878 | 138325.7532 | 147879.7816 | 139203.0407 | 157889.3394 | 182109.1464 | 183024.1765 | 162220.4841 | 150905.3699 | 161761.8576 | 149998.851   | 170088.3211 | 152861.0016 | 148685.2194 |
| Q8R010 | Aimp2    | Aminocyl tRNA synthase complex-interacting multifunctional protein 2     | 133.343  | 31.56 | 35378  | 6  | 66122.29624 | 63656.50563 | 65336.64688 | 87176.19159 | 48759.92164 | 46157.01491 | 46681.14038 | 66588.59327 | 72338.73025 | 73053.63935 | 70390.59669 | 66694.8073   | 63453.4473  | 68415.76125 | 55839.74478 |
| Q8R016 | Blmh     | Bleomycin hydrolase                                                      | 195.995  | 21.98 | 52511  | 8  | 153718.7745 | 165277.6313 | 175038.5803 | 168977.8505 | 151988.3076 | 144436.2737 | 170841.0897 | 148307.4167 | 148878.1654 | 161683.1061 | 166666.65   | 157719.862   | 156235.2486 | 153130.2614 | 169605.179  |
| Q8R050 | Gspt1    | Eukaryotic peptide chain release factor GTP-binding subunit ERF3A        | 258.743  | 20.75 | 68251  | 9  | 56077.003   | 55649.86985 | 56804.61997 | 49982.34975 | 46693.94046 | 34143.42567 | 49371.5086  | 45547.4467  | 49185.3448  | 43449.88026 | 38205.70176 | 50941.16909  | 51393.53614 | 49378.90611 | 37555.45894 |
| Q8R059 | Gale     | UDP-glucose 4-epimerase                                                  | 79.096   | 18.73 | 38225  | 3  | 10019.69392 | 10277.19249 | 7824.04209  | 10642.07185 | 8679.61064  | 8320.793665 | 11099.44327 | 12975.91689 | 12990.15446 | 11256.93658 | 7373.478576 | 9316.824809  | 10839.69397 | 8820.019749 | 11592.97987 |
| Q8R0G9 | Nup133   | Nuclear pore complex protein Nup133                                      | 140.219  | 7.53  | 128620 | 5  | 13553.08592 | 15489.58751 | 15016.92047 | 16680.18434 | 12517.36422 | 11582.30884 | 13681.24491 | 13417.35641 | 14212.67753 | 14638.30765 | 12043.95216 | 12912.07897  | 11365.59643 | 13412.97966 | 12137.26954 |
| Q8R0H9 | Gga1     | ADP-ribosylation factor-binding protein GGA1                             | 67.638   | 9.76  | 69972  | 2  | 6818.885451 | 4694.150238 | 4524.694196 | 4851.76658  | 4014.258598 | 2435.286417 | 4172.202467 | 3465.699009 | 3807.261094 | 2978.703687 | 5621.207492 | 2443.063199  | 2345.612122 | 3356.16131  | 3568.517975 |
| Q8R0X7 | Sgpl1    | Sphingosine-1-phosphate lyase 1                                          | 131.613  | 14.61 | 63677  | 7  | 94893.84648 | 102514.4209 | 71698.36323 | 91391.56098 | 100743.644  | 113560.6098 | 103269.017  | 111904.0197 | 99048.42865 | 76581.684   | 101432.1194 | 94428.90279  | 101052.8933 | 92107.99129 | 101831.6234 |
| Q8R146 | Apeh     | Acylaminoacyl-coA                                                        |          |       |        |    |             |             |             |             |             |             |             |             |             |             |             |              |             |             |             |

|        |          |                                                                                 |          |       |        |     |             |             |             |             |             |             |             |             |             |             |             |             |             |             |             |
|--------|----------|---------------------------------------------------------------------------------|----------|-------|--------|-----|-------------|-------------|-------------|-------------|-------------|-------------|-------------|-------------|-------------|-------------|-------------|-------------|-------------|-------------|-------------|
| Q8R1S4 | Mts1     | Metastasis suppressor protein 1                                                 | 214.905  | 13.31 | 82408  | 7   | 100059.3023 | 97358.44146 | 87147.31449 | 91569.53542 | 91931.43658 | 74756.02976 | 74765.98505 | 80694.12121 | 70163.26144 | 81696.54919 | 94061.58979 | 83487.22924 | 91192.93203 | 81916.13759 | 100672.9455 |
| Q8R2E9 | Ero1b    | ERO1-like protein beta                                                          | 79.667   | 7.28  | 53518  | 3   | 52470.13337 | 58413.07067 | 41372.93872 | 47635.73029 | 56678.16815 | 71727.03485 | 66593.78959 | 71285.22391 | 65436.96549 | 49450.35473 | 56217.9828  | 52551.21957 | 53242.51069 | 54917.82465 | 57131.64279 |
| Q8R2U0 | Seh1l    | Nucleoporin SEH1                                                                | 78.308   | 14.17 | 39775  | 4   | 20948.22308 | 22548.30852 | 22172.43438 | 19565.74943 | 21432.76468 | 23024.36306 | 22689.31938 | 22111.13397 | 24253.97507 | 21155.28735 | 23743.70056 | 25779.77785 | 22343.76751 | 25304.7558  | 23538.30456 |
| Q8R2Y8 | Pth2     | Peptidyl-HRNA hydrolase 2, mitochondrial                                        | 212.469  | 27.62 | 19527  | 3   | 27514.39962 | 22660.61418 | 24407.86886 | 25005.78903 | 18007.10344 | 24621.16564 | 25210.1693  | 19864.229   | 22796.9497  | 31544.99318 | 27883.77721 | 24120.61267 | 24655.89081 | 23339.96957 | 24267.11583 |
| Q8R323 | Rfc3     | Replication factor C subunit 3                                                  | 124.109  | 12.36 | 40526  | 3   | 13113.49627 | 11271.64826 | 14056.70886 | 11281.12926 | 13336.05828 | 12091.44987 | 12036.5856  | 11573.60544 | 11666.01765 | 11810.27299 | 11103.75604 | 13143.03427 | 12834.44912 | 13885.27063 | 9265.202752 |
| Q8R395 | Commf5   | COMM domain-containing protein 5                                                | 63.053   | 16.52 | 24493  | 2   | 5593.635529 | 8291.6897   | 7208.166759 | 6012.036192 | 4561.928044 | 4034.26589  | 7386.262132 | 5808.867693 | 4862.347698 | 4788.630904 | 5027.246854 | 8606.506347 | 8583.729196 | 5071.222163 | 7258.722877 |
| Q8R3F5 | Mcat     | Malonyl-CoA-acyl carrier protein transacylase, mitochondrial                    | 70.672   | 6.82  | 41928  | 2   | 10485.81144 | 11284.49681 | 8215.505955 | 4943.293094 | 6752.95361  | 7123.779233 | 10765.36576 | 10607.56439 | 6659.014835 | 10137.2458  | 5665.89329  | 10870.86468 | 10694.69584 | 10369.69081 | 11228.11967 |
| Q8R404 | Mic13    | MICOS complex subunit MIC13                                                     | 98.273   | 22.69 | 13373  | 2   | 24023.67967 | 19569.22152 | 22021.83533 | 22823.77941 | 20753.1251  | 24522.42222 | 21672.3114  | 21547.55954 | 22539.19142 | 22967.12915 | 22874.67101 | 19643.41421 | 22007.79659 | 20810.78407 | 22417.38    |
| Q8R480 | Nup85    | Nuclear pore complex protein Nup85                                              | 169.923  | 10.37 | 74776  | 5   | 11449.45876 | 15633.50974 | 15442.73891 | 13793.40178 | 13571.2757  | 14561.77909 | 14963.5722  | 15206.79436 | 16332.38302 | 10569.8872  | 11093.45662 | 8383.979276 | 15476.46262 | 11738.75365 | 16568.57903 |
| Q8R491 | Ehd3     | EH domain-containing protein 3                                                  | 259.129  | 23.55 | 60791  | 13  | 215506.7792 | 237170.3563 | 218514.5374 | 220474.1477 | 226824.6998 | 240314.2119 | 245482.6639 | 252397.9291 | 261071.2527 | 246890.024  | 224968.6983 | 239976.6761 | 236766.9264 | 238889.5405 | 242334.507  |
| Q8R4N0 | Clybl    | Citramalyl-CoA lyase, mitochondrial                                             | 100.364  | 9.76  | 37549  | 2   | 13116.48654 | 13398.45196 | 11989.72354 | 13456.28462 | 9837.783531 | 11271.23615 | 11704.74888 | 11431.55145 | 13619.33641 | 14595.13193 | 12792.68671 | 11494.73654 | 12466.83828 | 12320.85755 | 10082.74323 |
| Q8R4R6 | Nup35    | Nucleoporin NUP35 G                                                             | 70.765   | 10.46 | 34786  | 2   | 5165.576648 | 5476.26616  | 9784.367737 | 5566.920071 | 3946.683631 | 5067.368147 | 7431.089439 | 5672.018939 | 3601.516903 | 8763.658132 | 4177.513107 | 5269.587237 | 8131.089218 | 4371.73937  | 3627.734542 |
| Q8R4X3 | Rbm12    | RNA-binding protein 12                                                          | 49.964   | 2.72  | 102796 | 2   | 5557.678752 | 4932.463208 | 5327.711196 | 5905.393407 | 4694.231382 | 5271.334343 | 5912.607211 | 5626.949024 | 4538.10439  | 4103.545386 | 4755.623342 | 6619.057033 | 5307.517156 | 5506.827087 | 4962.936449 |
| Q8R5A3 | Apbb1p   | Amyloid beta A4 precursor protein-binding family B member 1-interacting protein | 44.92    | 5.22  | 74319  | 3   | 19354.64413 | 18555.50617 | 18304.78423 | 20365.48343 | 16284.73918 | 12570.59805 | 16867.6359  | 8830.310886 | 14856.39127 | 13598.00105 | 15888.27758 | 17714.68871 | 17967.77008 | 16967.2241  | 17518.98019 |
| Q8R5C5 | Actr1b   | Beta-actin                                                                      | 280.734  | 31.38 | 42281  | 8   | 99966.82183 | 101290.4666 | 107129.8764 | 99247.39079 | 101482.3307 | 94324.65872 | 102359.0456 | 107097.9646 | 110216.9098 | 108670.96   | 101541.5587 | 100283.6318 | 112851.8604 | 119879.0006 | 84957.32795 |
| Q8R5G7 | Arap3    | Arf-GAP with Rho-GAP domain, ANK repeat and PH domain-containing protein 3      | 60.89    | 2.02  | 169741 | 2   | 8870.23425  | 7651.204136 | 9075.189417 | 7667.99529  | 7288.628798 | 8645.01578  | 7460.668665 | 8105.753557 | 10963.90792 | 8109.089228 | 6715.305488 | 8130.24635  | 6414.671709 | 6526.674579 | 7721.494198 |
| Q8R5H1 | Usp15    | Ubiquitin carboxyl-terminal hydrolase 15                                        | 150.196  | 5.1   | 112325 | 5   | 16830.58645 | 17890.98536 | 14591.34691 | 20915.62583 | 16809.23686 | 17417.21482 | 18945.43491 | 21419.57244 | 21677.46318 | 18944.39274 | 7480.454736 | 20436.44777 | 12987.23889 | 16137.99413 | 5697.91057  |
| Q8R5J9 | Arfip5   | PRA1 family protein 3                                                           | 153.183  | 23.94 | 21558  | 5   | 64947.26296 | 60086.62192 | 63081.78364 | 68424.98978 | 63326.78699 | 98176.09892 | 78383.56315 | 94706.11063 | 84001.25278 | 77528.74929 | 72079.43583 | 51932.86918 | 70715.48105 | 96592.85893 | 65172.73962 |
| Q8R5L3 | Vps39    | Vam6/Vps39-like protein                                                         | 58.742   | 4.06  | 101693 | 3   | 13603.37865 | 14138.14223 | 17462.47895 | 13552.39434 | 13916.53649 | 13092.99036 | 7813.359608 | 15554.83667 | 13506.14378 | 14070.84937 | 13885.32025 | 14139.81769 | 16687.49861 | 15137.02167 | 14699.28143 |
| Q8VB70 | Tmx1     | Thioredoxin-related transmembrane protein 1                                     | 168.028  | 16.91 | 31396  | 4   | 38522.16793 | 39918.85788 | 41903.18794 | 41661.53123 | 38315.64931 | 48834.18456 | 50577.25992 | 48006.01971 | 46269.28823 | 44702.86695 | 37216.9455  | 43722.24167 | 35414.74341 | 39105.24089 | 44111.60291 |
| Q8VB76 | Apob9    | Apolipoprotein B receptor                                                       | 330.318  | 11.36 | 102705 | 10  | 68354.80437 | 73788.94025 | 57884.42355 | 73065.45817 | 79784.97178 | 69928.58372 | 75879.00859 | 74711.30124 | 71360.01216 | 54006.75444 | 78138.88962 | 72413.9778  | 73654.13571 | 63952.09472 | 73739.49877 |
| Q8VB79 | Aspccr1  | Tether containing UBX domain for GLUT4                                          | 60.7     | 6.91  | 59796  | 2   | 10794.81008 | 10816.41825 | 9985.806809 | 11256.28588 | 9561.931154 | 6454.509576 | 8011.799586 | 8915.378725 | 8614.066779 | 7440.553176 | 9432.353499 | 9905.431487 | 8630.976247 | 9282.321113 | 10632.5077  |
| Q8VBW6 | Nae1     | NEDD8-activating enzyme E1 regulatory subunit                                   | 205.366  | 17.6  | 60274  | 5   | 19213.36299 | 20978.96169 | 18205.82046 | 17601.08237 | 17564.71467 | 15361.76336 | 19543.95619 | 18669.0283  | 18467.664   | 17110.96891 | 19370.64381 | 19311.7116  | 20259.10385 | 16853.79412 | 7061.568034 |
| Q8VC04 | Tmem106a | Transmembrane protein 106A                                                      | 102.21   | 26.82 | 29109  | 5   | 123115.3099 | 142602.9075 | 126563.8017 | 128252.6844 | 133602.5245 | 129954.9534 | 130766.1299 | 111378.1016 | 123014.9807 | 130505.6501 | 120859.6071 | 132162.4329 | 147178.886  | 137914.2828 | 111626.5789 |
| Q8VC30 | Tkfc     | Trickase/FMN cyclase                                                            | 39.395   | 5.71  | 59691  | 2   | 8325.918741 | 7500.780579 | 10025.14458 | 6276.293473 | 7128.58627  | 5197.403288 | 7059.577075 | 6249.384676 | 9004.257467 | 5605.438951 | 6542.060102 | 5801.287239 | 7212.908345 | 7954.522757 | 9645.5984   |
| Q8VCF0 | Mavs     | Mitochondrial antiviral-signaling protein                                       | 233.55   | 24.85 | 53399  | 6   | 27131.31358 | 27453.95873 | 30920.80716 | 32870.78994 | 24043.26139 | 21467.14873 | 31229.86519 | 27322.29415 | 22416.3351  | 21522.59484 | 22944.21623 | 29104.04973 | 26942.38624 | 27644.25422 | 39644.87246 |
| Q8VCH8 | Ubxn4    | UBX domain-containing protein 4                                                 | 78.25    | 10.08 | 56472  | 3   | 10585.5136  | 9606.891157 | 4783.688192 | 10359.72911 | 10881.10438 | 12042.41257 | 13660.99032 | 5156.563384 | 12510.8503  | 10765.59151 | 4439.989891 | 8634.365581 | 10146.03049 | 10516.06903 | 5727.750538 |
| Q8VCN5 | Cth      | Cystathionine gamma-lyase                                                       | 349.244  | 29.9  | 43567  | 8   | 91735.9291  | 99126.88213 | 84041.22329 | 91819.34711 | 78444.5801  | 137130.2717 | 163010.5519 | 146473.0703 | 166316.0635 | 129930.9773 | 113641.8228 | 123248.0596 | 117383.3629 | 117843.4668 | 120894.9766 |
| Q8VCT3 | Rnppe    | Aminopeptidase B                                                                | 1034.075 | 55.85 | 72416  | 27  | 640507.8737 | 704821.0836 | 682337.8047 | 692513.5666 | 698034.9332 | 556694.2133 | 608786.7992 | 569254.7144 | 564944.8464 | 520171.5342 | 568713.8899 | 661660.7931 | 633850.7523 | 640361.7671 | 636777.8227 |
| Q8VCW4 | Unc93b1  | Protein unc-93 homolog B1                                                       | 192.292  | 13.88 | 66981  | 6   | 52044.65908 | 59820.69714 | 49175.69761 | 51608.76244 | 59921.59614 | 64656.72144 | 53229.99308 | 63070.73404 | 49887.16    | 49560.84568 | 49657.52083 | 56190.033   | 65028.28111 | 48108.50835 | 60275.69703 |
| Q8VCW8 | Acsf2    | Acyl-CoA synthetase family member 2, mitochondrial                              | 80.641   | 5.04  | 67951  | 2   | 15390.35257 | 16060.10939 | 10743.15048 | 13167.55879 | 13096.65834 | 17409.67957 | 15026.92141 | 14964.69089 | 16650.37094 | 16216.54001 | 14364.60632 | 13993.26945 | 12763.79709 | 11943.46567 | 14745.17419 |
| Q8VDD5 | Myh9     | Myosin-9                                                                        | 6108.517 | 65.77 | 262372 | 143 | 5815748.475 | 5900396.63  | 5343489.037 | 5595955.647 | 5567632.364 | 5027692.829 | 5122633.499 | 5154454.032 | 5065190.692 | 5154755.489 | 5727510.874 | 5682539.518 | 5787184.843 | 5793794.283 | 5678934.586 |
| Q8VDF2 | Uhrf1    | E3 ubiquitin-protein ligase UHRF1                                               | 38.961   | 4.73  | 88304  | 3   | 9955.045203 | 11722.49984 | 10171.87072 | 10136.68672 | 10805.65775 | 9029.645236 | 9172.036331 | 10234.36847 | 11103.57756 | 8520.85197  | 9768.207083 | 10315.88157 | 9926.534181 | 9209.783896 | 10227.68416 |
| Q8VDJ3 | Hdlbp    | Vigilin                                                                         | 1039.386 | 32.1  | 141743 | 27  | 364317.3519 | 339093.2223 | 356721.5783 | 322299.4807 | 345478.3606 | 295170.3888 | 357097.1872 | 372378.686  | 335606.4648 | 333214.9852 | 346819.2221 | 325438.4205 | 342308.6517 | 327902.4435 | 354053.3247 |
| Q8VDK1 | Nit1     | Deaminated glutathione amidase                                                  | 137.33   | 25.08 | 35705  | 4   | 15294.38208 | 14517.18942 | 10768.29589 | 12183.86048 | 9829.689056 | 7034.771161 | 5813.054615 | 7210.324713 | 9290.101282 | 8233.897648 | 11647.2274  | 12134.60561 | 7820.635788 | 10255.77501 | 9148.214844 |
| Q8VDL4 | Adpgk    | ADP-dependent glucokinase                                                       | 153.351  | 11.69 | 53902  | 4   | 28832.55263 | 31222.89845 | 28535.15878 | 23800.40336 | 26078.77255 | 41807.12131 | 37612.19255 | 34666.11621 | 37476.59123 | 33635.89622 | 30914.12569 | 31680.00777 | 32573.11802 | 31242.66331 | 31902.04357 |
| Q8VDM4 | Psm2d    | 26S proteasome non-ATPase regulatory subunit 2                                  | 1167.44  | 45.04 | 100203 | 29  | 410161.3038 | 426491.1229 | 359918.6984 | 442954.5568 | 390059.6756 | 405904.9196 | 419166.6934 | 482382.9824 | 448156.592  | 351141.9854 | 401920.726  | 458942.1462 | 452695.1243 | 372442.2948 | 434551.7313 |
| Q8VDM6 | Hnmpul1  | Heterogeneous nuclear ribonucleoprotein U-like protein 1                        | 336.085  | 17.23 | 96002  | 11  | 106264.5175 | 110186.726  | 106383.966  | 115024.1286 | 98302.17377 | 89707.55268 | 98332.46749 | 73446.76074 | 92041.0853  | 65215.49525 | 70871.0762  | 76901.00781 | 96842.89699 | 103414.407  | 93789.76445 |
| Q8VDP3 | Mical1   | [F-actin]-monooxygenase MICAL1                                                  | 108.756  | 8.11  | 116785 | 5   | 13321.00763 | 9291.755842 | 10427.23697 | 13975.56397 | 8994.72378  | 12539.29205 | 7960.141289 | 13397.28111 | 7418.727578 | 9457.712331 | 8526.162563 | 16622.60473 | 10233.36475 | 12743.23441 | 9825.405347 |
| Q8VDP4 | Ccar2    | Cell cycle and apoptosis regulator protein 2                                    | 138.216  | 9.76  | 103002 | 6   | 43281.45254 | 37315.92355 |             |             |             |             |             |             |             |             |             |             |             |             |             |

|        |          |                                                                      |          |       |        |    |             |             |             |             |             |             |             |             |             |             |              |             |             |             |             |
|--------|----------|----------------------------------------------------------------------|----------|-------|--------|----|-------------|-------------|-------------|-------------|-------------|-------------|-------------|-------------|-------------|-------------|--------------|-------------|-------------|-------------|-------------|
| Q8VEM8 | Slc25a3  | Phosphate carrier protein, mitochondrial                             | 445.343  | 35.29 | 39632  | 11 | 222565.2546 | 220412.2246 | 217267.502  | 220429.0075 | 213086.3959 | 208858.6354 | 203141.0305 | 197093.1278 | 231865.6099 | 219107.6307 | 193457.5945  | 219377.3082 | 214615.1619 | 235261.3321 | 204946.3949 |
| Q8VH51 | Rbm39    | RNA-binding protein 39                                               | 289.043  | 17.55 | 59407  | 6  | 38010.18549 | 37581.69331 | 30996.69868 | 38713.15439 | 34087.79265 | 31008.25961 | 27064.29577 | 34947.64132 | 38127.47495 | 38232.41633 | 34310.38114  | 37763.4459  | 29922.88242 | 34855.43421 | 37211.87106 |
| Q8VHR5 | Gatad2b  | Transcriptional repressor p66-beta                                   | 34.843   | 5.89  | 65411  | 2  | 12980.54224 | 11292.56496 | 9430.550069 | 9743.309429 | 12195.64872 | 8482.914319 | 5599.32488  | 8110.218433 | 8393.513249 | 9999.898884 | 10956.42306  | 8985.426741 | 9781.392554 | 4793.804176 | 12680.81066 |
| Q8VI93 | Oas3     | 2'-5'-oligoadenylate synthase 3                                      | 642.936  | 28.3  | 126333 | 19 | 110048.8292 | 152840.316  | 123344.9514 | 112773.2371 | 126124.6086 | 147212.125  | 123344.0918 | 134738.4716 | 150053.891  | 132551.138  | 149769.2949  | 130305.9235 | 141442.9519 | 124916.6197 | 99429.98563 |
| Q8VIJ6 | Sfpq     | Splicing factor, proline- and glutamine-rich                         | 665.644  | 31.9  | 75442  | 18 | 484663.5046 | 578361.2188 | 496568.9848 | 492127.3366 | 505937.5287 | 472512.933  | 449686.4411 | 431817.6094 | 396878.4439 | 459627.3952 | 484769.9582  | 454272.7458 | 478907.6509 | 465341.2616 | 459002.9777 |
| Q8WYT4 | Clapin1  | Anamorsin                                                            | 142.093  | 29.77 | 33429  | 5  | 30967.0666  | 31553.38925 | 30061.94274 | 30158.02334 | 24414.46045 | 12561.48436 | 11243.36828 | 10897.89428 | 17152.47645 | 9948.725191 | 29212.3801   | 15726.77694 | 24416.35555 | 11308.31289 | 22526.14106 |
| Q91V04 | Tram1    | Translocating chain-associated membrane protein 1                    | 171.159  | 19.25 | 43039  | 6  | 43309.14649 | 51637.36173 | 36312.97316 | 48399.25676 | 52182.85516 | 55001.72393 | 53961.62165 | 55101.30371 | 58026.36931 | 57301.83234 | 55723.85431  | 51338.23496 | 52855.58572 | 54119.2084  | 22906.89414 |
| Q91V61 | Sfxn3    | Sideroflexin-3                                                       | 244.941  | 22.12 | 35406  | 4  | 15639.80385 | 13694.49501 | 11902.00406 | 10524.11885 | 10202.54969 | 10297.53487 | 7094.999476 | 10638.52229 | 7509.680861 | 10168.88877 | 13144.96304  | 12715.67673 | 12761.37608 | 14398.21559 | 10612.1139  |
| Q91V64 | Isoc1    | Isochorismatase domain-containing protein 1                          | 205.121  | 30.98 | 32033  | 6  | 31520.4131  | 44445.45146 | 49376.3426  | 38872.74993 | 32465.93194 | 34910.53822 | 42960.31977 | 39947.30703 | 39030.26708 | 30916.29368 | 42748.4012   | 42586.98561 | 43859.28473 | 42194.69324 | 41830.97735 |
| Q91V76 |          | Ester hydrolase C11orf54 homolog                                     | 97.997   | 18.1  | 34996  | 3  | 16210.41332 | 17359.69918 | 13076.32671 | 12611.28549 | 13223.38223 | 7740.826511 | 10611.13023 | 5841.508067 | 8734.590286 | 8794.396994 | 9213.538124  | 11258.18278 | 12177.10815 | 10170.49183 | 13374.65295 |
| Q91V92 | Acly     | ATP-citrate synthase                                                 | 784.041  | 24.47 | 119728 | 21 | 256067.4989 | 284528.3663 | 261292.1242 | 280850.5494 | 243809.9984 | 238421.6971 | 277335.38   | 235185.8143 | 248353.9713 | 236476.1421 | 244338.5093  | 282797.4225 | 266899.5651 | 225296.1469 | 257102.4106 |
| Q91VD9 | Ndufs1   | NADH-ubiquinone oxidoreductase 75 kDa subunit, mitochondrial         | 429.426  | 23.11 | 79777  | 13 | 149972.3698 | 163988.2696 | 155511.5815 | 157896.2959 | 150453.3376 | 168709.3638 | 147124.6474 | 154516.5219 | 166670.7472 | 146222.1254 | 150564.9733  | 151968.8918 | 161768.0926 | 151437.4159 | 139426.5709 |
| Q91VH2 | Snx9     | Sorting nexin-9                                                      | 142.806  | 14.45 | 66546  | 5  | 21668.98579 | 18019.5502  | 6613.086051 | 24295.64754 | 21521.22591 | 9501.333632 | 25355.43057 | 10708.9487  | 20537.13734 | 17652.08985 | 19088.9346   | 20729.50122 | 15642.02339 | 24732.9073  | 8429.313977 |
| Q91VI7 | Rnh1     | Ribonuclease inhibitor                                               | 1644.278 | 88.6  | 49816  | 30 | 835420.8204 | 852669.3356 | 745567.6483 | 820085.0122 | 765490.4258 | 743641.0802 | 764718.7859 | 770095.5762 | 760593.3437 | 611310.7572 | 6090917.3297 | 800917.3005 | 710815.3382 | 782729.1538 | 816918.2823 |
| Q91VJ1 | Aim2     | Interferon-inducible protein AIM2                                    | 135.597  | 14.12 | 40155  | 4  | 27569.1356  | 22174.47373 | 21525.49371 | 18432.52545 | 30699.30917 | 16970.28683 | 15875.89136 | 21236.79496 | 24777.33525 | 23588.19785 | 14700.16118  | 22354.61828 | 20607.18964 | 25422.86312 | 21235.9001  |
| Q91VJ4 | Stk38    | Serine/threonine-protein kinase 38                                   | 101.51   | 12.26 | 54174  | 3  | 7285.611193 | 6603.847827 | 4407.402441 | 7359.873721 | 5747.970353 | 5007.226157 | 4560.683918 | 3980.994941 | 2641.545645 | 5288.383138 | 1042.33863   | 6216.381384 | 6071.277091 | 5952.72616  | 6789.103943 |
| Q91VM9 | Ppa2     | Inorganic pyrophosphatase 2, mitochondrial                           | 59.856   | 10    | 38115  | 2  | 7903.557585 | 8560.614874 | 8099.727464 | 7533.917194 | 5935.551086 | 6172.131186 | 7054.076633 | 6800.915744 | 6526.86711  | 8060.842645 | 8063.905259  | 7642.241482 | 7768.18548  | 7873.892095 | 6741.32626  |
| Q91VN4 | Chchd6   | MICOS complex subunit Mic25                                          | 76.019   | 10.26 | 29852  | 2  | 17475.96508 | 10594.55116 | 9573.432395 | 5197.145207 | 10755.19055 | 14350.74568 | 14610.04156 | 13119.54517 | 15437.13395 | 10371.72358 | 10407.0235   | 10152.64779 | 16237.869   | 13828.17798 | 11348.26683 |
| Q91VR2 | Atp5f1c  | ATP synthase subunit gamma, mitochondrial                            | 288.365  | 41.95 | 32886  | 10 | 135202.7498 | 139961.7036 | 122152.636  | 145634.0168 | 142498.3411 | 147636.4109 | 134682.4608 | 101604.861  | 142382.7287 | 138717.9317 | 107849.4619  | 119597.9428 | 124380.3316 | 140920.2641 | 119084.4834 |
| Q91VR5 | Ddx1     | ATP-dependent RNA helicase DDX1                                      | 342.974  | 25.81 | 82500  | 13 | 131437.7124 | 121487.0623 | 116037.6925 | 121269.5401 | 118043.8305 | 117343.5312 | 114228.473  | 118412.5842 | 118964.2186 | 121337.7784 | 103696.9776  | 127844.1151 | 115667.7867 | 127519.5623 | 129395.688  |
| Q91VU0 | Fam3c    | Protein FAM3C                                                        | 136.48   | 20.26 | 24753  | 4  | 47771.46862 | 46440.80996 | 36097.63534 | 42888.86793 | 56353.54307 | 56269.47085 | 45414.39068 | 41723.30298 | 48601.07378 | 50329.05416 | 53746.39006  | 42217.98787 | 49599.9284  | 50177.44671 | 49524.96205 |
| Q91VW3 | Sh3bgrl3 | SH3 domain-binding glutamic acid-rich-like protein 3                 | 104.967  | 55.91 | 10477  | 4  | 25272.3366  | 21576.28098 | 15851.9673  | 19087.62655 | 17666.94268 | 13072.61821 | 14785.99497 | 17339.98566 | 16698.08522 | 11509.11356 | 66123.94984  | 21822.99925 | 18879.55012 | 17901.83197 | 17710.52357 |
| Q91W50 | Csde1    | Cold shock domain-containing protein E1                              | 192.314  | 13.41 | 88791  | 8  | 59906.59243 | 40774.07257 | 69259.07891 | 59146.53837 | 61993.79325 | 79618.66212 | 57163.30932 | 84717.61751 | 91035.4273  | 88382.30399 | 46132.27119  | 62507.93609 | 65175.20477 | 65960.73946 | 59148.9292  |
| Q91W86 | Vps11    | Vacuolar protein sorting-associated protein 11 homolog               | 39.991   | 4.68  | 107719 | 2  | 8616.449748 | 10164.22134 | 6209.744299 | 8503.386535 | 7375.706522 | 7924.635965 | 7884.176563 | 9521.639824 | 8474.390378 | 8202.6044   | 8617.44619   | 9009.728232 | 8250.230131 | 6430.214005 | 8274.12079  |
| Q91W89 | Man2c1   | Alpha-mannosidase 2C1                                                | 128.331  | 5.29  | 115688 | 4  | 17037.39035 | 17082.85427 | 16688.82815 | 16341.37052 | 14913.63879 | 15814.62177 | 12308.27364 | 15154.43063 | 14789.34811 | 14158.62108 | 15044.64153  | 16752.21947 | 16922.28873 | 15606.07503 | 16387.8289  |
| Q91W90 | Txndc5   | Thioredoxin domain-containing protein 5                              | 155.332  | 17.75 | 46415  | 6  | 50856.94901 | 50711.36283 | 43424.29924 | 54773.40766 | 41235.82435 | 44580.75889 | 50653.99025 | 46696.17843 | 49628.85646 | 57372.89554 | 43356.04679  | 44750.6142  | 47928.63685 | 46661.39525 | 55985.83701 |
| Q91WC0 | Setd3    | Histone-lysine N-methyltransferase setd3                             | 73.032   | 6.57  | 67176  | 2  | 8477.908513 | 8182.110297 | 6777.470347 | 8412.442432 | 7137.906522 | 5647.226253 | 6966.563799 | 7158.59844  | 6838.712138 | 5757.566275 | 8112.595641  | 6843.378554 | 7014.608111 | 7011.417185 | 5062.029638 |
| Q91WD5 | Ndufs2   | NADH dehydrogenase [ubiquinone] iron-sulfur protein 2, mitochondrial | 32.247   | 6.91  | 52626  | 2  | 5270.618724 | 0.007562416 | 0.009509917 | 0.009171104 | 7162.417935 | 7449.042761 | 6624.644554 | 8218.605432 | 1199.168607 | 7608.007107 | 6941.474286  | 1463.42213  | 8201.057483 | 4703.532492 | 730.1357028 |
| Q91WK2 | Elf3h    | Eukaryotic translation initiation factor 3 subunit H                 | 308.963  | 37.22 | 39832  | 10 | 128389.0901 | 138556.9697 | 132473.1693 | 134047.6021 | 138261.609  | 124158.9386 | 134000.1458 | 136266.9432 | 137677.4216 | 119250.5185 | 140507.9128  | 135957.0657 | 133360.4877 | 127041.4876 | 123097.166  |
| Q91WM3 | Rrp9     | U3 small nucleolar RNA-interacting protein 2                         | 57.29    | 11.58 | 52107  | 2  | 1215.872434 | 1661.366763 | 3200.82453  | 1927.03945  | 1331.166987 | 1312.870534 | 1781.963904 | 3350.104856 | 1862.420941 | 2886.144439 | 1797.89582   | 1611.748287 | 1319.390924 | 1524.712869 | 1297.239527 |
| Q91WQ3 | Yars     | Tyrosine-tRNA ligase, cytoplasmic                                    | 323.828  | 27.46 | 59105  | 12 | 128930.2678 | 132015.1323 | 146873.4857 | 161121.7547 | 138053.673  | 110989.2826 | 148425.8679 | 157454.4051 | 108454.7412 | 102905.4636 | 148358.0815  | 150612.7543 | 143670.124  | 130738.661  | 142568.3051 |
| Q91WU5 | As3mt    | Arsenite methyltransferase                                           | 106.388  | 12.23 | 41794  | 3  | 16237.18181 | 15607.43542 | 11186.51591 | 14745.52856 | 14755.53771 | 12356.37504 | 13464.26215 | 15444.4485  | 15026.96791 | 13226.11808 | 15261.8436   | 15156.31967 | 15895.30776 | 13394.2632  | 16465.5485  |
| Q91X20 | Ash2l    | Set1/Ash2 histone methyltransferase complex subunit ASH2             | 44.107   | 3.69  | 68250  | 2  | 7110.010851 | 7680.936227 | 10831.95172 | 11817.91739 | 9582.629898 | 7950.817564 | 7875.875301 | 6719.472662 | 6667.115175 | 10902.56886 | 12975.3304   | 7815.517441 | 6578.497057 | 9211.58826  | 7752.304108 |
| Q91X91 | Qprt     | Nicotinate-nucleotide pyrophosphorylase [carboxylating]              | 118.312  | 18.39 | 31530  | 3  | 70924.39481 | 62467.87538 | 69190.15103 | 69866.87986 | 72658.33005 | 66575.3861  | 61769.71    | 74113.88923 | 76565.69836 | 50281.4578  | 64776.29906  | 69454.08451 | 71135.30918 | 74648.54343 | 44023.30626 |
| Q91XD6 | Vps36    | Vacuolar protein-sorting-associated protein 36                       | 85.835   | 17.1  | 43736  | 4  | 6030.251855 | 25205.05889 | 21469.98433 | 22380.14333 | 24191.26779 | 9052.40642  | 22935.97861 | 22415.78334 | 15045.97357 | 20417.48886 | 20585.91487  | 22264.18707 | 20094.57084 | 20896.5838  | 24017.05423 |
| Q91XD7 | Crelid1  | Cysteine-rich with EGF-like domain protein 1                         | 71.479   | 6.43  | 45718  | 2  | 9105.784051 | 1956.588612 | 1287.385629 | 1906.829639 | 1639.858216 | 997.6670936 | 1658.2388   | 2203.05726  | 8828.306739 | 1463.891472 | 3119.337874  | 7551.22894  | 7319.247586 | 7063.807103 | 8715.452471 |
| Q91XU1 | Oki      | Protein quaking                                                      | 203.341  | 23.75 | 37643  | 5  | 64714.09982 | 64286.28092 | 71090.73181 | 62294.99201 | 56941.54734 | 48053.27738 | 51447.84587 | 37111.99014 | 42920.42891 | 37215.69312 | 59678.57361  | 57610.55336 | 51186.73726 | 49218.60225 | 48850.41086 |
| Q91XV3 | Basp1    | Brain acid soluble protein 1                                         | 801.696  | 84.07 | 22087  | 14 | 1144827.639 | 747578.5585 | 953338.4316 | 820983.2668 | 915820.6104 | 914920.9642 | 798046.4778 | 758037.1615 | 754324.9176 | 740907.278  | 1013588.527  | 785056.4754 | 80164.6964  | 776361.1034 | 689800.9356 |
| Q91YE6 | Ipo9     | Importin-9                                                           | 480.2    | 15.75 | 116052 | 9  | 50550.24655 | 40744.75886 | 53106.29866 | 61933.85286 | 53768.40395 | 29574.00291 | 57953.80306 | 62876.06117 | 55007.74593 | 42416.8365  | 53430.24618  | 58584.45613 | 56109.48187 | 51775.98419 | 50549.2291  |
| Q91YH5 | Ait3     | Atlastin-3                                                           | 275.605  | 21.44 | 60575  | 7  | 52953.18378 |             |             |             |             |             |             |             |             |             |              |             |             |             |             |

|        |          |                                                                                               |          |       |        |    |             |             |             |             |             |             |             |             |             |             |             |             |             |             |             |
|--------|----------|-----------------------------------------------------------------------------------------------|----------|-------|--------|----|-------------|-------------|-------------|-------------|-------------|-------------|-------------|-------------|-------------|-------------|-------------|-------------|-------------|-------------|-------------|
| Q91YX0 | Themis2  | Protein THEMIS2                                                                               | 64.675   | 7.24  | 74378  | 2  | 3441.614113 | 3178.438173 | 897.1429323 | 3289.55079  | 2450.319321 | 1208.894684 | 2228.880866 | 2055.220716 | 2253.884131 | 1565.306047 | 2769.620307 | 2809.983446 | 2528.542304 | 2613.517703 | 1953.705208 |
| Q91Z53 | Ghrpr    | Glyoxylate reductase/hydroxypyruvate reductase                                                | 105.315  | 12.5  | 35329  | 2  | 3354.105689 | 3851.391305 | 2671.920675 | 4101.696405 | 2850.472403 | 2019.850402 | 2226.189825 | 2946.718054 | 3130.759084 | 2457.792403 | 3169.536718 | 3689.252756 | 3674.737321 | 3323.93174  | 2838.172681 |
| Q91Z67 | Srgap2   | SLIT-ROBO Rho GTPase-activating protein 2                                                     | 226.916  | 8.87  | 120798 | 8  | 62568.92247 | 60554.00946 | 61683.05547 | 23767.85282 | 27395.44329 | 64612.57133 | 59082.38568 | 53316.54547 | 34272.87755 | 57096.52164 | 57109.89054 | 30937.81884 | 26023.47195 | 61094.25178 | 50487.9576  |
| Q91ZA3 | Pcca     | Propionyl-CoA carboxylase alpha chain, mitochondrial                                          | 104.067  | 7.18  | 79922  | 3  | 6652.941758 | 9948.599856 | 8307.75572  | 6799.652269 | 8647.746249 | 6524.572798 | 7488.063755 | 7669.463304 | 9013.413653 | 7339.798483 | 8040.991547 | 7944.794806 | 7645.302671 | 8426.826731 | 6072.065361 |
| Q91ZJ5 | Ugp2     | UTP--glucose-1-phosphate uridylyltransferase                                                  | 356.313  | 26.77 | 56979  | 10 | 133143.5417 | 132088.1247 | 114298.8801 | 153684.3015 | 128363.6314 | 133348.8915 | 128246.7695 | 144231.1037 | 137761.6065 | 163686.7819 | 111994.7445 | 136607.0256 | 133582.1217 | 117135.7071 | 159990.8687 |
| Q91ZR2 | Snx18    | Sorting nexin-18                                                                              | 249.209  | 13.19 | 67904  | 7  | 91016.68415 | 83523.01706 | 75975.99067 | 79027.19828 | 83603.06295 | 86134.8259  | 89316.69837 | 88545.87853 | 74428.90243 | 86213.02497 | 77356.64072 | 86639.63698 | 77363.88814 | 71229.26815 | 84168.85362 |
| Q91ZV7 | Ptxdc1   | Plexin domain-containing protein 1                                                            | 90.334   | 7.6   | 55635  | 3  | 30367.60326 | 31240.35062 | 26490.84986 | 27345.47742 | 26554.18343 | 23509.47802 | 24894.76766 | 14992.07826 | 25485.17401 | 31173.58308 | 30579.48712 | 25280.61968 | 29322.92821 | 29224.8341  | 29719.47417 |
| Q91ZW3 | Smarca5  | SWI/SNF-related matrix-associated actin-dependent regulator of chromatin subfamily A member 5 | 195.545  | 7.33  | 121627 | 7  | 59721.38061 | 64475.37913 | 60087.49103 | 54631.02169 | 60601.32665 | 62876.65014 | 59153.47584 | 61667.09388 | 65933.43561 | 55233.00751 | 60595.99031 | 62104.13169 | 68465.8355  | 62622.6043  | 62449.70614 |
| Q91ZX7 | Lrp1     | Prolow-density lipoprotein receptor-related protein 1                                         | 2764.038 | 22.4  | 504742 | 73 | 1259187.125 | 1216806.73  | 1090362.792 | 1117435.157 | 1215509.377 | 879684.749  | 910759.7436 | 835685.9624 | 837641.8519 | 958483.3668 | 996298.8925 | 987516.015  | 1069052.116 | 1108972.038 | 1063142.038 |
| Q920A5 | Scepe1   | Retinoid-inducible serine carboxypeptidase                                                    | 437.629  | 27.43 | 50965  | 14 | 339462.0391 | 338661.0454 | 261158.9474 | 327055.1748 | 308566.6054 | 200291.6838 | 268283.8991 | 197175.1961 | 267690.8462 | 234539.307  | 341791.7862 | 336347.769  | 350227.2721 | 287752.4898 | 306609.5994 |
| Q920B9 | Supt16h  | FACT complex subunit SPT16                                                                    | 441.24   | 19.29 | 119825 | 15 | 115849.0866 | 134425.5918 | 140623.3112 | 144611.1727 | 139180.9378 | 137604.8362 | 121563.6395 | 121170.9707 | 122616.374  | 126172.6999 | 124488.6395 | 136960.4722 | 119428.0198 | 126487.261  | 138555.5811 |
| Q920E5 | Fdps     | Farnesyl pyrophosphate synthase                                                               | 786.464  | 56.94 | 40582  | 18 | 522514.5187 | 539572.8626 | 611624.0746 | 782305.4945 | 769250.0029 | 454848.3272 | 565369.7125 | 557862.845  | 718635.0394 | 479121.5953 | 631200.3988 | 740808.9184 | 651415.5396 | 672793.9859 | 461525.4905 |
| Q920L1 | Fads1    | Fatty acid desaturase 1                                                                       | 86.641   | 8.72  | 52323  | 2  | 13093.90628 | 14891.15654 | 12648.7418  | 12893.21668 | 14083.83335 | 11860.25252 | 13955.69592 | 15798.1849  | 13376.0782  | 13393.7218  | 11064.8355  | 12310.54093 | 12611.43536 | 13673.11293 | 12648.82935 |
| Q920Q4 | Vps16    | Vacuolar protein sorting-associated protein 16 homolog                                        | 284.336  | 10.61 | 94928  | 5  | 22211.42623 | 18509.31115 | 22158.0435  | 22995.01309 | 19577.46578 | 20501.43342 | 16880.29772 | 23056.37152 | 21398.87163 | 23638.66637 | 24189.04581 | 20790.80234 | 20744.78983 | 19537.76099 | 19851.84816 |
| Q921E2 | Rab31    | Ras-related protein Rab-31                                                                    | 169.472  | 30.41 | 21331  | 5  | 42328.79766 | 60119.58271 | 54820.87021 | 56664.63138 | 63695.80386 | 55142.76362 | 47890.00968 | 54523.56867 | 57570.32416 | 53686.53048 | 52825.99216 | 48527.79839 | 59556.60256 | 57008.99013 | 59927.8564  |
| Q921F2 | Tardbp   | TAR DNA-binding protein 43                                                                    | 665.188  | 42.75 | 44548  | 13 | 331267.0626 | 345280.6396 | 313251.6124 | 319530.0642 | 330180.9007 | 285997.4911 | 276894.8111 | 341686.0822 | 315480.3031 | 291188.4368 | 315286.1034 | 323475.2268 | 319158.813  | 308063.7049 | 313361.6487 |
| Q921F4 | Hnrnp1l  | Heterogeneous nuclear ribonucleoprotein L-like                                                | 394.855  | 33.84 | 64125  | 13 | 137540.4522 | 148710.3144 | 131358.7496 | 145173.2238 | 132750.0086 | 107904.9259 | 115885.4159 | 108062.2889 | 113145.7174 | 112099.8558 | 135891.8903 | 128678.7958 | 116945.5697 | 123098.2223 | 136130.9535 |
| Q921H8 | Acaa1a   | 3-ketoacyl-CoA thiolase A, peroxisomal                                                        | 269.331  | 29.25 | 43953  | 8  | 92779.22586 | 95624.64423 | 75389.48078 | 74903.01718 | 83485.5059  | 95470.87473 | 79111.339   | 81742.14559 | 102598.6123 | 97233.2152  | 85220.64119 | 78617.87389 | 90092.53276 | 70473.85319 | 71233.7025  |
| Q921M3 | Sf3b3    | Splicing factor 3B subunit 3                                                                  | 700.526  | 23.66 | 135550 | 19 | 214959.3495 | 235506.5946 | 223103.5671 | 248174.971  | 239567.5628 | 201337.4152 | 232318.746  | 208108.7879 | 214397.3341 | 219833.4476 | 220763.1559 | 244360.3051 | 213453.8621 | 206772.7663 | 208762.3642 |
| Q921M7 | Fam49b   | Protein FAM49B                                                                                | 581.935  | 58.64 | 36776  | 15 | 245539.7969 | 285304.1794 | 280562.2222 | 282940.0203 | 250786.1155 | 224577.7289 | 236261.7619 | 228537.4558 | 220253.4509 | 222238.3674 | 242502.9758 | 261257.0157 | 253071.4933 | 266091.6092 | 250333.2459 |
| Q921S7 | Mrip37   | 39S ribosomal protein L37, mitochondrial                                                      | 115.989  | 11.11 | 48341  | 3  | 9838.010159 | 11265.07463 | 9987.667186 | 9891.331042 | 9699.484345 | 10579.37252 | 10391.83214 | 8709.726045 | 10363.28505 | 9346.898366 | 9528.722464 | 11233.56542 | 11098.92722 | 9409.7364   | 10340.59261 |
| Q921T2 | Tor1a1p1 | Torsin-1A-interacting protein 1                                                               | 343.201  | 25.38 | 66781  | 9  | 109716.5264 | 98128.56763 | 94308.11116 | 87521.00675 | 99173.27958 | 113154.9857 | 114404.7351 | 91905.50964 | 102848.9559 | 94577.35642 | 91834.80719 | 52893.8021  | 113183.8061 | 93400.36085 | 93186.95396 |
| Q921W4 | Cryz11   | Quinone oxidoreductase-like protein 1                                                         | 37.166   | 11.78 | 38725  | 2  | 10780.9086  | 11332.02281 | 9922.597954 | 11383.73671 | 8903.339544 | 8579.182331 | 12977.81871 | 10123.59782 | 12561.13381 | 11181.27792 | 11077.63736 | 12239.88263 | 10194.07785 | 9595.562362 | 10049.4047  |
| Q921Z5 | Tnfai8   | Tumor necrosis factor alpha-induced protein 8                                                 | 85.739   | 21.72 | 22960  | 2  | 5902.843443 | 2671.832663 | 4615.965962 | 5058.864453 | 5071.25531  | 3372.752053 | 4111.345729 | 5115.307843 | 5168.894584 | 4146.272416 | 4650.386698 | 179.6792802 | 4208.413308 | 4093.386435 | 5384.821369 |
| Q922B2 | Dars     | Aspartate--tRNA ligase, cytoplasmic                                                           | 547.159  | 46.51 | 57147  | 22 | 375620.8302 | 402113.0708 | 432394.9206 | 378575.0601 | 417896.741  | 522507.8879 | 455131.723  | 545266.6949 | 495647.7826 | 472366.6088 | 386408.9002 | 405348.108  | 399895.1115 | 388752.2489 | 387283.3664 |
| Q922D4 | Ppp6r3   | Serine/threonine-protein phosphatase 6 regulatory subunit 3                                   | 123.538  | 4.15  | 94653  | 4  | 9161.455775 | 10063.08065 | 7162.64635  | 6789.201201 | 10151.35509 | 10273.37881 | 11156.08074 | 11647.03047 | 12218.65135 | 11685.27716 | 7553.189834 | 10064.17066 | 9770.706505 | 10294.87106 | 10438.3464  |
| Q922D8 | Mthfd1   | C-1-tetrahydrofolate synthase, cytoplasmic                                                    | 571.914  | 23.85 | 101200 | 18 | 146826.1091 | 168510.2766 | 225030.2384 | 218614.6881 | 158885.6875 | 228001.7789 | 222635.5912 | 173328.0121 | 186996.8527 | 216244.5497 | 148592.4898 | 177693.978  | 147558.4964 | 203795.1541 | 207995.1339 |
| Q922F4 | Tubb6    | Tubulin beta-6 chain                                                                          | 1199.02  | 64.65 | 50090  | 27 | 3021368.976 | 2979401.827 | 2969736.95  | 3039797.38  | 2903157.996 | 2748006.518 | 2812769.623 | 2500315.254 | 2818368.999 | 2815131.366 | 3212375.058 | 3027462.935 | 2720448.158 | 3028860.441 | 2715511.792 |
| Q922H2 | Pdk3     | [Pyruvate dehydrogenase (acetyl-transferring)] kinase isozyme 3, mitochondrial                | 102.409  | 10.6  | 47923  | 3  | 8995.024672 | 8434.756426 | 6389.292729 | 8298.387744 | 7615.0977   | 7324.65296  | 7155.713836 | 9504.744429 | 9300.341952 | 5704.399215 | 7777.483333 | 6448.681674 | 6387.359921 | 7320.342183 | 6370.920645 |
| Q922K7 | Nop2     | Probable 28S rRNA (cytosine-C(5))-methyltransferase                                           | 44.331   | 3.78  | 86752  | 2  | 6977.573022 | 11399.56842 | 4197.097463 | 11107.86074 | 11781.39487 | 12345.21117 | 9368.413015 | 13614.64165 | 6067.303462 | 9959.860867 | 3071.551428 | 7018.536047 | 10316.44064 | 9214.929279 | 10798.63315 |
| Q922L6 | Nelfcd   | Negative elongation factor D                                                                  | 77.402   | 5.25  | 66276  | 2  | 8115.508086 | 6471.312711 | 4697.716161 | 6674.371555 | 5298.791676 | 4724.494741 | 6525.176051 | 5664.161898 | 5326.875382 | 6228.718802 | 6645.564141 | 6813.130449 | 6168.640542 | 6797.618236 | 6295.051935 |
| Q922Q1 | Marc2    | Mitochondrial amidoxime reducing component 2                                                  | 233.604  | 36.39 | 38194  | 9  | 108705.6661 | 110152.9296 | 88426.28427 | 79917.59322 | 113678.4981 | 81361.67147 | 78250.2552  | 74139.75952 | 83740.58392 | 80353.99423 | 63827.01049 | 77424.02253 | 112939.3699 | 70845.90341 | 95155.3606  |
| Q922Q8 | Lrrc59   | Leucine-rich repeat-containing protein 59                                                     | 337.106  | 39.74 | 34877  | 9  | 232561.8973 | 259211.274  | 239914.2672 | 272390.7199 | 246184.9781 | 287053.3423 | 301788.5693 | 307002.8163 | 307845.2942 | 259009.3961 | 211778.1523 | 248025.2484 | 246578.4577 | 263742.1816 | 263785.0658 |
| Q922R8 | Pdia6    | Protein disulfide-isomerase A6                                                                | 791.765  | 48.64 | 48100  | 16 | 689651.8035 | 712232.7955 | 681308.7556 | 671463.8294 | 636505.0034 | 774412.879  | 769355.1934 | 812105.702  | 745237.679  | 743566.6266 | 677425.2843 | 651225.9311 | 662772.5337 | 674251.9265 | 664527.204  |
| Q922U1 | Prpf3    | U4/U6 small nuclear ribonucleoprotein Prp3                                                    | 89.173   | 12.3  | 77455  | 5  | 34470.51885 | 33609.56849 | 35410.42493 | 40999.71687 | 30238.38834 | 24217.2391  | 31435.58151 | 30905.04781 | 29626.18695 | 27080.90903 | 27919.31222 | 30571.95941 | 32411.23169 | 31063.28837 | 36099.75545 |
| Q922W5 | Pycr1    | Pyroline-5-carboxylate reductase 1, mitochondrial                                             | 64.77    | 10.68 | 32373  | 3  | 64747.6098  | 55850.22471 | 59230.79487 | 53983.63348 | 59961.14414 | 73827.95437 | 66409.11816 | 57939.68948 | 72020.59884 | 61968.44661 | 61739.13325 | 57022.02367 | 60807.85013 | 61652.02451 | 62825.753   |
| Q922Y1 | Ubxm1    | UBX domain-containing protein 1                                                               | 53.654   | 24.24 | 33573  | 4  | 36520.6265  | 35314.45839 | 26972.18244 | 35879.16414 | 33275.67408 | 23838.25378 | 29178.5799  | 35410.97899 | 23762.83674 | 25870.57025 | 42183.22462 | 40492.63976 | 36830.11926 | 22567.26605 | 25747.64786 |
| Q923D2 | Blvrb    | Flavin reductase (NADPH)                                                                      | 485.078  | 63.11 | 22197  | 9  | 89878.23338 | 95459.91969 | 73116.74365 | 89279.60255 | 74082.96737 | 66359.68817 | 49200.18279 | 59764.78066 | 77377.81071 | 78656.52955 | 100378.6417 | 92243.78156 | 92406.55705 | 88767.1327  | 71200.8289  |
| Q923G2 | Poli2h   | DNA-directed RNA polymerases I, II, and III subunit RPABC3                                    | 69.717   | 12.67 | 17143  | 2  | 23521.55445 | 21762.88359 | 0.009509917 | 18416.94833 | 663.5936945 | 8147.423859 | 14685.8226  | 21476.91442 | 11838.75196 | 8762.664179 | 17691.67965 | 19919.97004 | 18346.30491 | 5119.99853  |             |

|        |         |                                                                 |          |       |        |    |             |             |             |             |             |             |             |             |             |             |             |             |             |             |             |
|--------|---------|-----------------------------------------------------------------|----------|-------|--------|----|-------------|-------------|-------------|-------------|-------------|-------------|-------------|-------------|-------------|-------------|-------------|-------------|-------------|-------------|-------------|
| Q99020 | Hnrnpab | Heterogeneous nuclear ribonucleoprotein A/B                     | 444.007  | 33.33 | 30831  | 11 | 434787.036  | 411036.4189 | 395974.2571 | 406162.9871 | 399551.0638 | 353045.537  | 434021.809  | 420258.687  | 436492.2087 | 394999.793  | 422400.573  | 420001.6862 | 424233.0356 | 435942.4852 | 410123.8995 |
| Q99104 | Myo5a   | Unconventional myosin-Va                                        | 75.721   | 2.48  | 215538 | 4  | 13427.75462 | 13259.27987 | 12952.27103 | 6973.751319 | 13446.4354  | 16855.91677 | 8312.275007 | 11075.88186 | 8165.924167 | 6740.682251 | 10871.46492 | 11099.9927  | 12111.357   | 10773.52261 | 10796.94373 |
| Q99J09 | Wdr77   | Methylome protein 50                                            | 103.063  | 11.4  | 36943  | 2  | 7211.539213 | 7177.484018 | 7981.696313 | 7018.461642 | 6961.564258 | 7210.205182 | 7186.554952 | 8617.253305 | 6881.968428 | 7944.32764  | 6241.804277 | 7754.937453 | 7531.064512 | 6719.436719 | 6691.474526 |
| Q99J36 | Thmpd1  | THUMP domain-containing protein 1                               | 159.824  | 20    | 38885  | 4  | 18689.71973 | 15953.15036 | 19190.30138 | 15449.93237 | 14687.23072 | 12510.01798 | 17526.17694 | 14668.14941 | 14765.27649 | 18323.54382 | 17789.08358 | 17278.03739 | 17783.54819 | 15255.168   | 15419.57265 |
| Q99J47 | Dhrs7b  | Dehydrogenase/reductase SDR family member 7B                    | 54.128   | 12.07 | 34987  | 2  | 4382.670638 | 6425.153162 | 3756.244127 | 6940.33356  | 6599.858537 | 8566.598979 | 7415.020987 | 5634.305739 | 7836.46005  | 6899.887589 | 5159.810109 | 7555.228264 | 7223.268747 | 4125.20905  | 7591.675587 |
| Q99J56 | Derl1   | Derlin-1                                                        | 63.347   | 8.76  | 28835  | 2  | 9251.579392 | 9774.876043 | 6997.441871 | 9977.745766 | 8177.023685 | 6587.881339 | 9757.731816 | 8920.029753 | 11528.57517 | 8477.132653 | 7389.554319 | 7037.256652 | 8315.896652 | 10278.85202 | 9608.524944 |
| Q99J77 | Nans    | Sialic acid synthase                                            | 327.599  | 35.38 | 40024  | 7  | 77576.14375 | 92563.64304 | 96097.00272 | 85245.13318 | 96046.08197 | 79148.47409 | 86978.99639 | 80388.89903 | 73601.90939 | 87996.93766 | 89411.58731 | 87665.47803 | 87874.61299 | 85028.4459  | 82637.35094 |
| Q99J99 | Mpst    | 3-mercaptopyruvate sulfurtransferase                            | 187.533  | 30.3  | 33097  | 6  | 65142.56027 | 60698.20204 | 60453.17588 | 60081.7204  | 55989.13441 | 49794.30931 | 58746.63067 | 54770.21818 | 56279.31698 | 59994.26836 | 58126.79721 | 54901.15846 | 56509.31888 | 59913.79799 | 52377.72349 |
| Q99JB2 | Stoml2  | Stomatin-like protein 2, mitochondrial                          | 288.499  | 29.75 | 38385  | 5  | 14693.69919 | 25223.39586 | 14177.76892 | 18026.65941 | 11071.81118 | 16576.10015 | 18767.82836 | 19151.38141 | 21461.41524 | 19296.54518 | 21126.24813 | 12265.64912 | 19588.63619 | 13352.03001 | 12935.59662 |
| Q99JF5 | Mvd     | Diphosphomevalonate decarboxylase                               | 73.384   | 6.23  | 44072  | 2  | 21556.07728 | 24693.05688 | 24687.79566 | 25553.85418 | 21952.63762 | 23356.62474 | 24522.93041 | 28409.26629 | 22630.86959 | 21205.50446 | 21989.96301 | 23927.89443 | 22073.01913 | 22155.64104 | 25353.02995 |
| Q99J14 | Psmdb6  | 26S proteasome non-ATPase regulatory subunit 6                  | 393.691  | 33.68 | 45536  | 12 | 113254.2701 | 129962.8742 | 116236.0313 | 102879.3771 | 112143.6191 | 111582.9208 | 117165.2365 | 139423.3405 | 132595.7049 | 99272.23612 | 102577.7527 | 114629.6652 | 115409.84   | 119649.3723 | 103304.854  |
| Q99J16 | Rap1b   | Ras-related protein Rap-1b                                      | 626.584  | 80.43 | 20825  | 13 | 509211.7448 | 512683.6953 | 453774.7747 | 480620.2428 | 490902.295  | 479173.1208 | 499710.3566 | 506360.6704 | 520948.993  | 501809.177  | 466011.0798 | 460353.6864 | 498722.0003 | 506074.2931 | 515564.4705 |
| Q99JR1 | Sfnx1   | Sideroflexin-1                                                  | 273.499  | 30.75 | 35649  | 6  | 74732.2585  | 74998.20077 | 71264.9535  | 74092.53060 | 65795.31963 | 77858.88839 | 64524.83363 | 68540.19613 | 66621.57241 | 69183.56561 | 72946.84    | 73343.21972 | 75167.18423 | 74248.23294 | 76489.32948 |
| Q99JW2 | Acy1    | Aminooxylase-1                                                  | 89.298   | 19.85 | 45781  | 5  | 33682.68477 | 34804.21831 | 38384.74196 | 39327.20501 | 32233.60964 | 30862.72165 | 19988.17557 | 24989.8978  | 32748.31335 | 34372.02303 | 39240.99048 | 34844.56343 | 36662.48333 | 32940.9037  | 34401.16773 |
| Q99JW4 | Lims1   | LIM and senescent cell antigen-like-containing domain protein 1 | 34.969   | 7.69  | 37240  | 2  | 24398.78617 | 24173.75336 | 22941.98403 | 22582.62983 | 25361.73822 | 23829.97121 | 24284.18038 | 22087.8307  | 22162.95554 | 18647.61564 | 20881.8039  | 21986.85912 | 21600.94024 | 22842.81433 | 22739.86092 |
| Q99JX3 | Gorasp2 | Golgi reassembly-stacking protein 2                             | 96.524   | 9.98  | 47038  | 3  | 6191.860804 | 6041.790678 | 3955.724156 | 6177.279395 | 4914.907622 | 4829.001803 | 4824.298402 | 4733.058857 | 3303.055736 | 3271.995488 | 4282.398726 | 5458.944182 | 4812.312709 | 3754.214105 | 4619.110845 |
| Q99JX4 | Eif3m   | Eukaryotic translation initiation factor 3 subunit M            | 280.026  | 29.14 | 42517  | 7  | 51058.67109 | 55935.68    | 53597.60952 | 55846.39927 | 45049.92725 | 28053.96321 | 40582.58095 | 41461.81936 | 41937.51788 | 31246.76752 | 25883.91172 | 51104.59648 | 50025.30989 | 38037.12133 | 25489.5932  |
| Q99JX7 | Nxf1    | Nuclear RNA export factor 1                                     | 65.96    | 10.68 | 70300  | 4  | 18531.4656  | 19246.83196 | 13444.7742  | 19424.92255 | 18437.9572  | 16950.55269 | 24065.29905 | 22410.418   | 16583.20997 | 17491.46338 | 10165.26878 | 20238.74583 | 26215.66138 | 20284.51513 | 21110.88613 |
| Q99JY0 | Hadhb   | Trifunctional enzyme subunit beta, mitochondrial                | 258.273  | 27.58 | 51386  | 10 | 166500.6405 | 169990.9976 | 158834.7556 | 172069.3745 | 136314.6024 | 152056.0155 | 155067.9886 | 135265.8478 | 144188.5183 | 164761.0416 | 161557.3498 | 167554.7054 | 158639.8633 | 158630.6926 | 136407.2036 |
| Q99K01 | Pdxcd1  | Pyridoxal-dependent decarboxylase domain-containing protein 1   | 79.299   | 4.96  | 87335  | 2  | 5005.206791 | 4527.456635 | 3869.508766 | 4917.833514 | 3397.790343 | 2090.927698 | 3484.980556 | 4099.846973 | 4376.517788 | 3099.981924 | 3683.405294 | 4177.401407 | 3470.873965 | 3335.798548 | 3497.467481 |
| Q99K23 | Ufsp2   | Ufm1-specific protease 2                                        | 49.549   | 6.29  | 52515  | 3  | 16229.62181 | 13462.91115 | 16262.15144 | 12496.97571 | 10007.45785 | 18608.37153 | 17178.98261 | 17897.70526 | 13558.13104 | 16437.46863 | 13479.21739 | 12202.76526 | 13512.94757 | 15950.61322 | 14410.3061  |
| Q99K51 | Pls3    | Plastin-3                                                       | 1198.189 | 64.6  | 70742  | 32 | 2458405.179 | 2475906.111 | 2347985.393 | 2353383.561 | 2565008.717 | 2528828.696 | 2547802.585 | 2578784.961 | 2561919.702 | 2399089.713 | 2492664.038 | 2687388.77  | 2597054.146 | 2686812.079 | 2507147.237 |
| Q99K70 | Rragc   | Ras-related GTP-binding protein C                               | 126.702  | 14.32 | 44121  | 6  | 40207.97437 | 45762.14365 | 39300.82756 | 43317.26852 | 47978.67812 | 44997.26599 | 45393.33962 | 50668.66666 | 55818.24514 | 51587.81848 | 44895.78574 | 46724.78966 | 48729.38034 | 54034.91459 | 50967.58273 |
| Q99K85 | Psat1   | Phosphoserine aminotransferase                                  | 655.923  | 51.08 | 40473  | 17 | 511328.0847 | 539010.5819 | 603198.3638 | 611697.4712 | 554838.7139 | 579406.7177 | 658472.8111 | 701289.7201 | 647546.0576 | 545907.4673 | 546030.0639 | 642459.8325 | 537532.9226 | 585443.8101 | 576908.5389 |
| Q99KB8 | Hagh    | Hydroxycarboxylate hydrolase, mitochondrial                     | 59.517   | 6.47  | 34084  | 2  | 22202.20039 | 25521.82013 | 24418.60556 | 25122.12218 | 18519.77887 | 20014.59368 | 23712.45992 | 24258.10922 | 23531.21936 | 19404.75172 | 22118.70977 | 22267.98202 | 24192.89413 | 29004.44465 | 20282.99689 |
| Q99KC8 | Vwa5a   | von Willebrand factor A domain-containing protein 5A            | 1382.493 | 55.23 | 87143  | 31 | 717709.2009 | 720349.3851 | 657710.1617 | 690039.8631 | 655780.7881 | 551110.5814 | 590959.2084 | 552164.7162 | 580819.7101 | 609276.6581 | 649041.6313 | 679081.8408 | 673884.6698 | 707318.0227 | 685712.4741 |
| Q99KD5 | Unc45a  | Protein unc-45 homolog A                                        | 74.061   | 5.83  | 103447 | 3  | 6155.230455 | 2346.157231 | 5950.641843 | 7248.355393 | 5820.435568 | 5157.32276  | 6224.970754 | 6861.490613 | 6948.26538  | 5631.215178 | 6490.016768 | 7832.670524 | 7220.37006  | 6093.519236 | 5539.764612 |
| Q99KE1 | Me2     | NAD-dependent malic enzyme, mitochondrial                       | 499.073  | 36.16 | 65799  | 12 | 85927.41244 | 111949.2605 | 98919.98368 | 99305.54476 | 103528.8665 | 103595.1185 | 92741.07842 | 94352.31396 | 105700.889  | 96971.50017 | 97393.94258 | 87358.85696 | 101328.3832 | 89576.83178 | 94026.62429 |
| Q99KH8 | Stk24   | Serine/threonine-protein kinase 24                              | 344.392  | 27.15 | 47954  | 10 | 139273.3461 | 131298.4875 | 132188.0524 | 115453.2628 | 132914.5075 | 91511.98541 | 103310.3103 | 96646.42387 | 97519.90438 | 108391.669  | 117413.8963 | 111806.9199 | 120699.8177 | 132716.4639 | 114348.8716 |
| Q99K10 | Aco2    | Aconitate hydratase, mitochondrial                              | 1271.939 | 51.54 | 85464  | 31 | 940083.1028 | 988989.3201 | 872352.9549 | 875675.4735 | 925361.3954 | 961124.4919 | 942790.8951 | 961146.1657 | 951453.9197 | 974113.3807 | 926720.7832 | 885634.8543 | 961801.3879 | 906300.0607 | 857913.705  |
| Q99KK2 | Cmas    | N-acylneuraminate cytidyltransferase                            | 187.57   | 18.06 | 48058  | 7  | 77929.58003 | 77548.38347 | 72290.65515 | 69720.73833 | 78904.26931 | 77408.08918 | 75014.32521 | 77435.52031 | 86314.1097  | 72866.13108 | 68257.94917 | 72062.637   | 76849.41741 | 67582.09508 | 72530.41225 |
| Q99KK7 | Dpp3    | Dipeptidyl peptidase 3                                          | 518.188  | 34.01 | 82898  | 15 | 124733.9895 | 118377.2457 | 129652.645  | 143107.0934 | 106460.1137 | 92571.03532 | 132793.1072 | 126541.1731 | 95514.65424 | 96632.60132 | 125852.886  | 124455.2702 | 100175.0798 | 125787.5108 | 109658.5349 |
| Q99KN9 | Clint1  | Clahtin interactor 1                                            | 207.204  | 12.68 | 68513  | 6  | 72815.98438 | 73984.84463 | 69434.62248 | 72239.43062 | 84223.58925 | 69019.51911 | 65116.82565 | 49428.00723 | 71206.96398 | 66902.86989 | 71750.49814 | 70278.58943 | 66171.194   | 70887.79027 | 51797.02214 |
| Q99KP3 | Cry1    | Lambda-crystallin homolog                                       | 80.371   | 14.42 | 35209  | 3  | 24193.85787 | 23467.25925 | 23765.35031 | 24435.02998 | 22797.20795 | 18629.25614 | 12953.148   | 14135.78201 | 12766.41696 | 17568.50401 | 20028.67408 | 22425.957   | 18486.00601 | 22143.91518 | 21839.77382 |
| Q99KP6 | Prpf19  | Pre-mRNA-processing factor 19                                   | 539.892  | 46.23 | 55239  | 17 | 285090.3061 | 323675.3927 | 325526.0439 | 327174.4358 | 324355.7846 | 279633.0138 | 287707.9747 | 305676.4746 | 275339.0743 | 270524.9108 | 266881.024  | 289509.1399 | 284170.859  | 284216.2916 | 301170.3806 |
| Q99KQ4 | Nampt   | Nicotinamide phosphoribosyltransferase                          | 728.798  | 53.36 | 55447  | 17 | 252051.1223 | 277601.8892 | 257464.1542 | 249521.344  | 245476.2302 | 250097.4759 | 273822.2885 | 275361.6075 | 244265.5574 | 248184.24   | 240407.9453 | 279535.7039 | 267531.2066 | 254260.9908 | 276353.9296 |
| Q99KR3 | Lactb2  | Endoribonuclease LACTB2                                         | 75.062   | 16.32 | 32754  | 3  | 23652.61025 | 28213.68279 | 22116.24028 | 29499.71694 | 24835.59976 | 22023.2179  | 22623.27666 | 27911.28582 | 28218.43009 | 25405.00641 | 21464.83146 | 25901.63288 | 23271.57601 | 24153.82707 | 25812.86151 |
| Q99L04 | Dhrs1   | Dehydrogenase/reductase SDR family member 1                     | 130.991  | 18.85 | 34005  | 3  | 11455.43519 | 7961.940962 | 10737.01778 | 10087.20977 | 3149.19695  | 9668.337768 | 6422.077838 | 6516.919765 | 5787.446905 | 4621.604085 | 5395.838307 | 6077.158126 | 9538.884385 | 3411.373047 | 11405.02766 |
| Q99L13 | Hibadh  | 3-hydroxyisobutyrate dehydrogenase, mitochondrial               | 131.632  | 21.79 | 35440  | 5  | 34142.14411 | 37265.00581 | 35100.03073 | 34098.88096 | 29588.80755 | 36387.34565 | 35059.62095 | 29998.34143 | 32260.77311 | 36033.1569  | 36959.2468  | 33177.92608 | 31679.32386 | 32612.5654  | 32293.30471 |
| Q99L20 | Gstt3   | Glutathione S-transferase theta-3                               | 18.425   | 9.13  | 27403  | 2  | 10323.5151  | 10368.      |             |             |             |             |             |             |             |             |             |             |             |             |             |

|        |         |                                                                         |          |       |        |    |             |             |             |             |             |             |             |             |             |             |             |             |             |             |             |
|--------|---------|-------------------------------------------------------------------------|----------|-------|--------|----|-------------|-------------|-------------|-------------|-------------|-------------|-------------|-------------|-------------|-------------|-------------|-------------|-------------|-------------|-------------|
| Q99L12 | Cloc1   | Chloride channel CLIC-like protein 1                                    | 184.009  | 12.8  | 60621  | 4  | 7733.453423 | 11044.07154 | 7725.123494 | 8829.433025 | 10905.72837 | 9741.413928 | 11869.66973 | 11226.12359 | 12429.85234 | 10489.85952 | 10230.78274 | 9863.58175  | 10726.90606 | 8024.144443 | 9703.090942 |
| Q99L17 | Cstf3   | Cleavage stimulation factor subunit 3                                   | 153.709  | 9.48  | 82877  | 4  | 8653.557719 | 8556.729683 | 10232.54756 | 10217.92207 | 14198.91063 | 6701.201773 | 10129.46411 | 9705.430097 | 9852.585238 | 6382.674721 | 9829.197947 | 9257.956126 | 11488.02668 | 9743.902733 | 7426.775984 |
| Q99LQ7 | Tmem189 | Transmembrane protein 189                                               | 104.394  | 21.77 | 31134  | 3  | 19567.56226 | 21677.33376 | 13567.29997 | 14117.01907 | 14586.7158  | 9483.706888 | 10776.64809 | 10662.06835 | 10503.17219 | 10108.16117 | 14959.00247 | 11171.86013 | 12854.85242 | 11397.37506 | 10792.03357 |
| Q99LR1 | Abhd12  | Monooacylglycerol lipase ABHD12                                         | 549.044  | 55.03 | 45270  | 17 | 374591.2879 | 364582.1629 | 348633.888  | 360253.0659 | 317193.7154 | 353670.6611 | 321500.1421 | 302407.1256 | 356070.5747 | 379737.3364 | 361798.1173 | 364681.8968 | 389359.7791 | 393733.9242 | 370369.2818 |
| Q99LX0 | Park7   | Protein/nucleic acid deglycase DJ-1                                     | 481.906  | 74.6  | 20021  | 12 | 573078.3799 | 470588.1436 | 426510.2978 | 459596.038  | 425496.7685 | 324779.1782 | 331276.108  | 319643.7082 | 327876.9155 | 306214.4868 | 456219.3902 | 436258.5266 | 430644.3211 | 411650.8887 | 379036.7234 |
| Q99M31 | Hspa14  | Heat shock 70 kDa protein 14                                            | 123.625  | 13.36 | 54650  | 4  | 17012.28666 | 18290.51912 | 20795.44826 | 16746.37563 | 17288.80236 | 19484.98694 | 16698.03578 | 21370.64558 | 23323.67813 | 18664.84697 | 23228.49628 | 16445.27574 | 15698.05247 | 17051.03564 | 17711.78236 |
| Q99MD9 | Nasp    | Nuclear autoantigenic sperm protein                                     | 209.463  | 13.45 | 83954  | 7  | 101019.9326 | 110625.5806 | 118951.9306 | 125881.7706 | 120195.4667 | 105976.4687 | 117968.9863 | 126806.9996 | 108968.5389 | 107001.9606 | 92105.97962 | 85579.9131  | 112581.6197 | 98975.88488 | 89287.31386 |
| Q99MN1 | Kars    | Lysine-tRNA ligase                                                      | 513.808  | 35.63 | 67840  | 14 | 111457.0462 | 122532.6646 | 109003.3872 | 114330.8573 | 114660.9781 | 107824.5353 | 127384.8213 | 118146.5216 | 116260.9233 | 104054.8759 | 107346.4559 | 117567.7171 | 111806.6709 | 109123.7761 | 116356.1713 |
| Q99MN9 | Pccb    | Propionyl-CoA carboxylase beta chain, mitochondrial                     | 169.033  | 11.65 | 58409  | 4  | 12358.78553 | 15073.0402  | 13106.10464 | 13387.43256 | 12785.83208 | 13950.81846 | 15296.34505 | 12089.06537 | 13083.06664 | 14923.93408 | 13474.02343 | 13407.52031 | 12710.72007 | 13254.18053 | 12829.03326 |
| Q99MR3 | Sic12a9 | Solute carrier family 12 member 9                                       | 175.845  | 8.42  | 96330  | 6  | 28549.67775 | 28856.64694 | 26037.73795 | 25228.61704 | 26753.09925 | 20452.63786 | 20315.61543 | 19949.1979  | 22278.52256 | 20193.88621 | 26352.86719 | 19055.47097 | 29987.21456 | 25485.91326 | 27363.3134  |
| Q99MR6 | Srrt    | Serrate RNA effector molecule homolog                                   | 64.149   | 4.8   | 100452 | 4  | 31338.33139 | 28050.43103 | 36858.39783 | 34240.05176 | 31193.83898 | 26261.02419 | 32389.46718 | 29655.95935 | 29043.67708 | 31549.10912 | 31660.49158 | 30713.76056 | 28502.75776 | 33356.77933 | 36862.27435 |
| Q99MZ7 | Pecr    | Peroxisomal trans-2-enoyl-CoA reductase                                 | 75.716   | 16.83 | 32410  | 3  | 17014.98182 | 16037.68305 | 18614.96089 | 8897.07849  | 15503.94304 | 17862.71246 | 16329.04177 | 16755.71708 | 18574.30291 | 20333.20371 | 20484.48773 | 17178.18674 | 18237.72985 | 20253.80094 | 15637.5609  |
| Q99N69 | Lpxn    | Leupaxin                                                                | 478.931  | 30.57 | 43478  | 11 | 99649.40868 | 90968.52538 | 87268.79418 | 84657.23792 | 83898.04666 | 74983.5122  | 68773.81391 | 64378.19034 | 68716.70482 | 73206.24208 | 91816.98437 | 93845.04206 | 86093.03425 | 85561.61324 | 81387.16464 |
| Q99NB9 | Sf3b1   | Splicing factor 3B subunit 1                                            | 1219.249 | 29.6  | 145816 | 30 | 323856.7468 | 343430.5702 | 339384.8846 | 344451.5111 | 341145.9925 | 300631.6538 | 328514.841  | 324518.8758 | 315960.4969 | 297502.7382 | 296203.5979 | 327587.2497 | 322500.9546 | 312183.9077 | 322210.9985 |
| Q99P69 | Nuf2    | Kinetochore protein Nuf2                                                | 53.86    | 4.97  | 54594  | 2  | 4133.179255 | 1494.940832 | 4474.485113 | 1915.952044 | 3596.901701 | 3539.497889 | 3511.051642 | 3736.717352 | 3946.322389 | 2582.892269 | 2545.600668 | 3570.22411  | 4059.344003 | 4589.28634  | 3462.046201 |
| Q99P72 | Rtn4    | Reticulon-4                                                             | 446.038  | 17.13 | 126613 | 11 | 374268.8485 | 380447.3246 | 258865.0221 | 368173.8547 | 358360.3416 | 271339.9193 | 401321.8641 | 419156.7489 | 270504.8495 | 362248.7568 | 366683.5822 | 368390.1515 | 263008.2794 | 348396.8657 | 362609.0396 |
| Q99P75 | Rab9a   | Ras-related protein Rab-9A                                              | 81.889   | 23.38 | 22896  | 3  | 21995.55073 | 24661.74092 | 20612.38235 | 19658.46241 | 17092.917   | 21278.23311 | 20377.4643  | 18229.40525 | 19577.54574 | 22053.76893 | 22362.45396 | 22931.71331 | 22838.8735  | 23881.21498 | 25205.95607 |
| Q99P88 | Nup155  | Nuclear pore complex protein Nup155                                     | 424.053  | 11.36 | 155118 | 10 | 65013.47673 | 73014.12539 | 70157.91351 | 71011.94718 | 68783.33258 | 66070.34616 | 67601.34481 | 71324.50147 | 70472.33031 | 61928.61259 | 65161.20363 | 65538.756   | 70641.8745  | 68702.52002 | 65203.09564 |
| Q99P91 | Gpnmb   | Transmembrane glycoprotein NMB                                          | 122.195  | 7.67  | 63676  | 5  | 64259.76755 | 57019.7712  | 49166.14965 | 50335.48309 | 43277.227   | 58265.46907 | 53546.00906 | 54398.68864 | 61373.20164 | 58498.99746 | 65384.24639 | 58527.1696  | 65485.02535 | 70067.00363 | 63149.53156 |
| Q99PD4 | Arcp1a  | Actin-related protein 2/3 complex subunit 1A                            | 94.403   | 9.46  | 41599  | 3  | 126147.932  | 105096.0632 | 109377.8497 | 96947.15878 | 89745.76163 | 55596.61619 | 88283.96461 | 87018.1568  | 95804.59511 | 43750.91982 | 64057.26285 | 89043.55201 | 70425.09232 | 76764.91952 | 84223.36496 |
| Q99PL5 | Rrbp1   | Ribosome-binding protein 1                                              | 1019.678 | 26.48 | 172879 | 33 | 501413.146  | 511903.6775 | 483778.9066 | 482342.1725 | 494348.2655 | 429330.1068 | 418403.3602 | 456756.1224 | 420112.9844 | 401703.8964 | 492492.6555 | 436836.6632 | 469057.717  | 490035.509  | 474241.7415 |
| Q99PV0 | Prpf8   | Pre-mRNA-processing-splicing factor 8                                   | 1095.879 | 22.96 | 273616 | 36 | 264276.7892 | 259784.1421 | 250333.9414 | 244245.2631 | 247363.5573 | 247009.5133 | 260656.1231 | 259987.5745 | 257841.4359 | 250794.1175 | 242153.037  | 257028.0287 | 254408.8916 | 256006.9337 | 240657.2798 |
| Q9CPN8 | Igf2bp3 | Insulin-like growth factor 2 mRNA-binding protein 3                     | 217.889  | 15.72 | 63575  | 6  | 42357.79138 | 42273.69204 | 40665.61008 | 41025.00619 | 39269.48397 | 39419.74077 | 46167.11045 | 37794.96296 | 39866.69422 | 36999.90943 | 43574.16916 | 40783.92706 | 38436.04109 | 37917.52937 | 44087.344   |
| Q9CPQ1 | Cox6c   | Cytochrome c oxidase subunit 6C                                         | 35.183   | 19.74 | 8469   | 2  | 100355.2447 | 98210.77865 | 112952.6182 | 107750.9206 | 106395.3837 | 135597.8641 | 127919.0904 | 124755.6511 | 119428.3898 | 129961.4006 | 103648.7313 | 109448.2816 | 114148.1088 | 113833.7046 | 110586.8489 |
| Q9CPQ3 | Tomn22  | Mitochondrial import receptor subunit TOM22 homolog                     | 166.177  | 30.99 | 15537  | 3  | 27935.13143 | 29393.94145 | 25002.11745 | 25732.14731 | 22281.81305 | 20025.87293 | 20461.22092 | 21586.37365 | 23880.10148 | 24786.53514 | 29222.49646 | 28619.10903 | 28218.87412 | 29483.67539 | 24239.96636 |
| Q9CPQ8 | Atp5mg  | ATP synthase subunit g, mitochondrial                                   | 123.324  | 41.75 | 11425  | 4  | 72786.12967 | 74369.77915 | 77051.64317 | 70736.2638  | 66382.71637 | 69352.87309 | 55352.61552 | 57404.10648 | 71174.38717 | 66478.98158 | 71283.33904 | 77016.5681  | 65921.80791 | 82992.42033 | 74867.03846 |
| Q9CPT4 | Mydgl   | Myeloid-derived growth factor                                           | 56.41    | 15.66 | 17982  | 2  | 56882.23783 | 48746.09896 | 53473.79991 | 65702.25419 | 58610.3912  | 68228.57583 | 46448.75136 | 65188.58439 | 62996.19384 | 54761.18651 | 57592.33382 | 54851.37125 | 63991.51981 | 55718.02011 | 36886.44512 |
| Q9CPU0 | Glo1    | Lactoylglutathione lyase                                                | 134.222  | 36.96 | 20810  | 6  | 178627.9534 | 167736.1575 | 164935.6815 | 166512.401  | 160438.9581 | 132832.9031 | 131441.8137 | 119843.6569 | 128584.3708 | 133723.1679 | 159058.4372 | 146695.1343 | 152242.1571 | 154688.9309 | 153484.4752 |
| Q9CPU4 | Mgst3   | Microsomal glutathione S-transferase 3                                  | 204.663  | 49.67 | 16958  | 4  | 50027.70973 | 52003.84395 | 44488.04532 | 53510.26697 | 44316.77862 | 35679.02841 | 40186.73518 | 46024.51953 | 41468.64924 | 39186.91095 | 41950.68306 | 39625.73374 | 43043.71101 | 48971.09674 | 43873.67077 |
| Q9CPV4 | Glod4   | Glyoxalase domain-containing protein 4                                  | 452.641  | 66.78 | 33317  | 15 | 198983.1153 | 199681.6315 | 178733.1072 | 186490.8433 | 200372.2649 | 167532.6288 | 149271.7754 | 149347.3106 | 169196.5859 | 146394.7949 | 187546.0179 | 181508.437  | 189451.3177 | 192369.9478 | 186914.3176 |
| Q9CPW4 | Arcp5   | Actin-related protein 2/3 complex subunit 5                             | 182.71   | 39.07 | 16288  | 5  | 442979.4131 | 412087.5644 | 391948.7091 | 413590.2604 | 440089.7787 | 372011.0478 | 335402.0542 | 349301.5839 | 375372.6494 | 345941.9709 | 436215.4729 | 396618.4554 | 400424.5449 | 410548.6199 | 394048.014  |
| Q9CPY7 | Lap3    | Cytosol aminopeptidase                                                  | 132.337  | 16.76 | 56141  | 6  | 35557.21981 | 38276.87215 | 37672.37544 | 36708.13561 | 34151.20625 | 29639.4211  | 36315.51016 | 33404.01624 | 36683.24136 | 35175.10376 | 31910.82176 | 37279.80264 | 36636.52187 | 35576.10185 | 34236.17551 |
| Q9CQ22 | Lamtor1 | Regulator complex protein LAMTOR1                                       | 139.49   | 52.8  | 17749  | 6  | 58931.75525 | 48294.85339 | 43024.01255 | 51479.50949 | 50998.72954 | 34829.04628 | 41706.6502  | 38523.67051 | 40918.35972 | 44919.71294 | 49638.93359 | 47541.21107 | 51068.78232 | 43009.21032 | 51269.52153 |
| Q9CQ60 | Pgls    | 6-phosphogluconolactonase                                               | 418.295  | 71.6  | 27254  | 9  | 261334.9694 | 155916.616  | 225142.075  | 227043.721  | 120274.356  | 152244.335  | 125528.1912 | 126062.6908 | 136705.9052 | 108387.9793 | 224898.8392 | 140980.9543 | 140869.9942 | 107401.3133 | 131007.572  |
| Q9CQ65 | Mtap    | S-methyl-5'-thioadenosine phosphorylase                                 | 143.254  | 19.43 | 31062  | 3  | 19320.21075 | 41790.03018 | 39175.53439 | 46495.98221 | 38410.96293 | 42465.31622 | 40623.19508 | 40308.41487 | 43253.68872 | 42483.99022 | 41150.35787 | 50869.7081  | 42422.48527 | 41717.4365  | 39681.31263 |
| Q9CQ69 | Uqcqr   | Cytochrome b-c1 complex subunit 8                                       | 7.134    | 18.29 | 9768   | 2  | 55513.9268  | 50841.41747 | 56158.71113 | 51839.23227 | 55326.34891 | 67675.94713 | 56518.07885 | 49149.64474 | 57435.63669 | 60304.42226 | 60707.10736 | 53470.9243  | 58595.23843 | 58329.38356 | 56747.27583 |
| Q9CQ71 | Rpa3    | Replication protein A 14 kDa subunit                                    | 90.716   | 33.06 | 13584  | 2  | 9296.02114  | 7037.357182 | 7896.559395 | 8358.313432 | 5719.65772  | 4399.438841 | 5307.540871 | 5816.908798 | 6528.74227  | 6938.950303 | 8459.47785  | 6346.706573 | 6685.683774 | 6696.926517 | 7025.032025 |
| Q9CQA1 | Trappc5 | Trafficking protein particle complex subunit 5                          | 84.532   | 19.15 | 20795  | 2  | 5412.64846  | 5116.649169 | 5741.183533 | 6583.482478 | 5249.139694 | 4934.411714 | 5547.194253 | 4708.812024 | 5466.498555 | 5232.193528 | 4679.537875 | 6141.072825 | 6575.496574 | 5343.499117 | 5606.948702 |
| Q9CQA3 | Sdhb    | Succinate dehydrogenase [ubiquinone] iron-sulfur subunit, mitochondrial | 263.81   | 30.5  | 31814  | 8  | 160705.2695 | 148422.0049 | 141238.8121 | 155954.1863 | 135227.7412 | 134021.2118 | 156850.9724 | 127442.1617 | 154305.0078 | 165786.2831 | 149220.4647 | 132617.3921 | 159406.9727 | 167627.0948 | 148347.3766 |
| Q9CQB5 | Cisd2   | CDGSH iron-sulfur domain-containing protein 2                           | 60.147   | 20.74 | 15242  | 3  |             |             |             |             |             |             |             |             |             |             |             |             |             |             |             |

|        |          |                                                               |          |       |        |    |             |             |             |             |             |             |             |             |             |             |             |             |             |             |             |
|--------|----------|---------------------------------------------------------------|----------|-------|--------|----|-------------|-------------|-------------|-------------|-------------|-------------|-------------|-------------|-------------|-------------|-------------|-------------|-------------|-------------|-------------|
| Q9CQN1 | Trap1    | Heat shock protein 75 kDa, mitochondrial                      | 264.616  | 17.28 | 80209  | 10 | 57564.62058 | 44904.73209 | 48852.24154 | 46881.73259 | 62683.74036 | 71606.72375 | 71453.44513 | 81072.50368 | 81846.6399  | 69904.1411  | 65207.8608  | 60875.17478 | 74344.66071 | 50004.60374 | 82997.66551 |
| Q9CQN6 | Tmem14c  | Transmembrane protein 14C                                     | 81.653   | 35.09 | 11642  | 2  | 17562.39919 | 18744.83503 | 17179.31878 | 21778.86284 | 15018.73402 | 22460.15887 | 23618.75816 | 24421.74608 | 22855.41517 | 21308.24972 | 16470.1525  | 17437.57246 | 18778.34602 | 21101.99914 | 19760.87981 |
| Q9CQ07 | Atp5pb   | ATP synthase F(0) complex subunit B1, mitochondrial           | 285.389  | 38.28 | 28949  | 8  | 237900.1802 | 228282.7331 | 211247.0014 | 234304.9057 | 219122.9361 | 236991.5624 | 222896.5145 | 225139.3109 | 239884.4596 | 239751.8691 | 251364.8049 | 187823.8493 | 231970.8053 | 237125.8954 | 174873.3585 |
| Q9CQS8 | Sec61b   | Protein transport protein Sec61 subunit beta                  | 94.284   | 26.04 | 9958   | 2  | 80802.15051 | 70203.60653 | 75585.09978 | 71483.32356 | 71364.27677 | 96883.35081 | 82466.67255 | 85527.55331 | 80376.55088 | 74913.95664 | 74093.91362 | 73017.94089 | 79219.24513 | 67034.65812 | 74582.40673 |
| Q9CQT1 | Mri1     | Methylthioribose-1-phosphate isomerase                        | 295.974  | 42.82 | 39411  | 8  | 45829.65862 | 51339.22483 | 41555.76212 | 46690.61137 | 42792.89727 | 37142.09937 | 39259.31847 | 47487.12464 | 43087.48777 | 35931.06766 | 37630.49934 | 48152.41536 | 40322.02986 | 41402.14323 | 39323.20224 |
| Q9CQV7 | Dnajc19  | Mitochondrial import inner membrane translocase subunit TIM14 | 122.275  | 28.45 | 12437  | 2  | 11380.00587 | 22225.84144 | 17549.46855 | 24589.36131 | 8372.546379 | 10739.07855 | 21436.9217  | 8861.42758  | 17689.86092 | 9052.47728  | 23620.21214 | 16593.35237 | 20616.34385 | 10382.20272 | 10918.79389 |
| Q9CQV8 | Ywhab    | 14-3-3 protein beta/alpha                                     | 836.75   | 74.8  | 28086  | 23 | 1454088.621 | 1458895.024 | 1459901.371 | 1385537.771 | 1574156.268 | 1471727.119 | 1487412.936 | 1461221.523 | 1482145.542 | 1429387.885 | 1449995.561 | 1496980.944 | 1624872.498 | 1629617.671 | 1506563.56  |
| Q9CQW1 | Ykt6     | Synaptobrevin homolog YKT6                                    | 149.569  | 30.3  | 22314  | 4  | 38373.59208 | 41883.89488 | 40418.31418 | 37762.77814 | 40160.05588 | 35896.1476  | 43273.65921 | 39450.68221 | 36569.74513 | 37209.71569 | 34827.23494 | 45520.85315 | 41919.16542 | 41104.76972 | 45376.19537 |
| Q9CQW9 | Ifitm3   | Interferon-induced transmembrane protein 3                    | 116.3    | 36.5  | 14954  | 3  | 46912.86955 | 56796.58919 | 60836.42556 | 59776.02917 | 53222.55556 | 84614.13736 | 77676.84146 | 82074.21011 | 95289.31115 | 65780.07803 | 75155.14802 | 79096.49948 | 69284.15156 | 65166.81355 | 61069.93175 |
| Q9CQX2 | Cyb5b    | Cytochrome b5 type B                                          | 139.1    | 58.22 | 16318  | 4  | 56081.06681 | 57676.25695 | 60218.78495 | 53721.05561 | 48768.03045 | 58352.03904 | 63961.10109 | 64612.66152 | 57286.32832 | 53153.37002 | 57980.35235 | 57809.70218 | 49948.9561  | 52689.52806 | 58238.70961 |
| Q9CR16 | Ppid     | Peptidyl-prolyl cis-trans isomerase D                         | 333.03   | 35.41 | 40743  | 10 | 109370.7488 | 122389.6593 | 87333.93711 | 124479.2796 | 127957.0503 | 93071.71331 | 122742.2766 | 131045.3804 | 125828.3315 | 95853.75001 | 113893.9493 | 123542.0278 | 114828.0127 | 99529.92236 | 111893.7533 |
| Q9CR51 | Atp6v1g1 | V-type proton ATPase subunit G 1                              | 167.366  | 22.88 | 13724  | 3  | 23783.66194 | 22817.31688 | 22551.88484 | 17999.63675 | 14747.94345 | 14885.68853 | 14350.52448 | 13876.21818 | 12094.84044 | 13721.63816 | 15319.10595 | 14009.51868 | 16050.4664  | 13940.93538 | 17459.42334 |
| Q9CR57 | Rpl14    | 60S ribosomal protein L14                                     | 119.827  | 21.66 | 23564  | 4  | 149394.9633 | 158637.9513 | 163372.3842 | 170182.2732 | 156496.6559 | 226240.3695 | 255937.7959 | 236207.6004 | 213911.7995 | 220199.8061 | 161554.4692 | 185512.0818 | 168787.1865 | 159943.5352 | 191739.2465 |
| Q9CR60 | Golt1b   | Vesicle transport protein GOT1B Mitochondrial                 | 127.103  | 10.87 | 15422  | 2  | 21504.44263 | 20602.43846 | 17125.07659 | 18884.62991 | 15166.38293 | 16434.79874 | 18582.28945 | 16556.41137 | 22636.02164 | 21974.56043 | 19991.50565 | 20403.08572 | 18658.39442 | 19774.33142 | 19207.88869 |
| Q9CR62 | Slc25a11 | 2-oxoglutarate/malate carrier protein                         | 437.786  | 57.01 | 34155  | 15 | 288463.7617 | 287284.7155 | 262733.2762 | 238642.7643 | 269426.0275 | 315060.8926 | 295406.137  | 288389.5678 | 313653.5608 | 316507.2883 | 296772.3511 | 283749.2394 | 321181.433  | 312972.018  | 294270.9648 |
| Q9CR68 | Uqcrrf1  | Cytochrome b-c1 complex subunit Rieske, mitochondrial         | 123.906  | 31.02 | 29368  | 5  | 36550.85006 | 41817.13388 | 34639.90051 | 14590.26751 | 51679.05932 | 31689.61279 | 57234.90577 | 23563.66801 | 7500.240535 | 33828.20309 | 44310.60576 | 59073.50198 | 23284.90996 | 24276.67674 | 5712.755752 |
| Q9CRA5 | Golph3   | Golgi phosphoprotein 3                                        | 148.018  | 22.82 | 33752  | 4  | 14821.99403 | 13133.79766 | 6206.536268 | 12132.90468 | 9872.188102 | 9204.26372  | 10978.73887 | 5419.583114 | 9630.123318 | 8810.61179  | 11119.76339 | 10741.53184 | 10300.65625 | 8670.992966 | 9590.633126 |
| Q9CRB9 | Chchd3   | MICOS complex subunit Mic19                                   | 147.242  | 15.42 | 26335  | 3  | 43563.57471 | 56217.02834 | 57571.92766 | 59528.06087 | 55401.65089 | 66257.30618 | 62873.07086 | 52534.45484 | 24720.86656 | 22469.94318 | 22490.93318 | 57562.2787  | 61908.31808 | 23218.83858 | 24168.8421  |
| Q9CRC8 | Lrrc40   | Leucine-rich repeat-containing protein 40                     | 175.109  | 14.45 | 68076  | 6  | 28761.75268 | 33309.70736 | 30987.65237 | 33453.36596 | 27769.77717 | 24952.75667 | 27635.68437 | 31144.8201  | 27639.38815 | 26526.01669 | 25593.23477 | 32016.2816  | 25888.16031 | 27167.7209  | 31446.02983 |
| Q9CRT8 | Xpot     | Exportin-T                                                    | 73.759   | 4.57  | 109734 | 4  | 11206.6811  | 12736.18002 | 15270.96127 | 11705.44642 | 5888.80972  | 12187.66154 | 15637.75412 | 16420.93952 | 10521.21268 | 12671.95835 | 6065.557003 | 6812.943056 | 6472.855077 | 15417.3064  | 14735.35769 |
| Q9CSH3 | Dis3     | Exosome complex exonuclease RRP44                             | 54.478   | 6.05  | 108838 | 3  | 17628.19136 | 18680.11587 | 11353.47797 | 12092.2572  | 5759.737795 | 12759.68996 | 14913.87576 | 14397.91044 | 14300.39839 | 13450.73726 | 13902.18555 | 17067.80034 | 14275.81833 | 13970.88597 | 13866.54092 |
| Q9CSN1 | SNW1     | SNW domain-containing protein 1                               | 136.612  | 9.33  | 61475  | 3  | 18008.39818 | 17489.69522 | 16613.98034 | 19004.03538 | 17643.49657 | 16134.83177 | 15172.84025 | 13297.86685 | 14586.26716 | 13253.49773 | 17161.75042 | 16217.39647 | 15862.70568 | 13091.5835  | 16259.21051 |
| Q9CSU0 | Rprid1b  | Regulation of nuclear pre-mRNA domain-containing protein 1B   | 106.769  | 18.4  | 36884  | 4  | 12106.37894 | 12629.67474 | 11656.0978  | 11965.11246 | 11262.90234 | 13237.7622  | 11556.21761 | 16120.33455 | 8605.782832 | 16546.00317 | 10466.01181 | 12353.48545 | 10544.12104 | 26162.85952 | 12188.07702 |
| Q9CT10 | Ranbp3   | Ran-binding protein 3                                         | 155.084  | 15.07 | 52573  | 5  | 63550.54639 | 61371.43097 | 66640.73457 | 62793.51486 | 67739.76376 | 49042.82341 | 58934.9449  | 57802.75609 | 59150.08804 | 52048.86012 | 56451.10592 | 63905.69581 | 55439.52687 | 62166.53449 | 68044.3363  |
| Q9CU62 | Smc1a    | Structural maintenance of chromosomes protein 1A              | 329.71   | 14.19 | 143235 | 15 | 151149.5913 | 135590.3551 | 139845.5806 | 135132.1035 | 139233.5087 | 116288.6833 | 132371.555  | 129955.2456 | 121814.5325 | 131022.5666 | 135804.0878 | 140375.8364 | 139596.911  | 133997.0793 | 147690.1843 |
| Q9CVB6 | Arpc2    | Actin-related protein 2/3 complex subunit 2                   | 836.237  | 77    | 34357  | 23 | 882359.171  | 883647.3498 | 729382.4535 | 845571.5826 | 847358.7329 | 734101.8667 | 753311.6607 | 849160.7303 | 840236.6867 | 767184.5435 | 834524.1847 | 866164.8598 | 817140.6367 | 842919.8901 | 795281.1738 |
| Q9CW03 | Smc3     | Structural maintenance of chromosomes protein 3               | 732.012  | 24.08 | 141556 | 22 | 145127.5848 | 146684.313  | 140743.6116 | 145067.0867 | 153468.4089 | 129049.2111 | 116146.0305 | 138672.4495 | 122065.9394 | 121357.479  | 145409.8568 | 142646.3214 | 146072.0797 | 140312.7888 | 144375.7627 |
| Q9CWI3 | Bccip    | BRCA2 and CDKN1A-interacting protein                          | 57.039   | 14.87 | 35942  | 3  | 21269.50672 | 19175.28206 | 23441.53524 | 25833.81588 | 22148.28636 | 20533.87535 | 19319.73106 | 19238.9297  | 19090.259   | 16430.05261 | 15763.35086 | 17241.26759 | 15754.01165 | 20080.63408 | 22106.8291  |
| Q9CWI9 | Atic     | Bifunctional purine biosynthesis protein PURH                 | 1231.219 | 73.14 | 64217  | 30 | 600864.6372 | 636206.9835 | 601211.0573 | 621975.2335 | 605254.1713 | 529522.5851 | 584192.2446 | 594374.6945 | 554541.147  | 553297.88   | 602452.2107 | 626068.5476 | 583257.4446 | 616298.7871 | 610294.277  |
| Q9CWK8 | Snx2     | Sorting nexin-2                                               | 876.156  | 52.22 | 58471  | 23 | 905432.857  | 893499.181  | 825001.7065 | 824161.3843 | 832571.7726 | 630772.8047 | 683982.5359 | 662358.2003 | 651469.3883 | 706675.037  | 843386.0621 | 784342.9886 | 821934.1872 | 862975.349  | 834006.1733 |
| Q9CWM4 | Pfdn1    | Prefoldin subunit 1                                           | 39.52    | 14.75 | 14255  | 2  | 10170.79524 | 16481.2849  | 18839.36998 | 9845.179755 | 14910.78397 | 14227.34458 | 12908.24278 | 12403.28938 | 13287.6988  | 15935.34753 | 18555.34022 | 15317.85298 | 9669.551464 | 15874.26392 | 14388.58629 |
| Q9CWP6 | Mospd2   | Motile sperm domain-containing protein 2                      | 60.307   | 8.11  | 59855  | 4  | 28423.41173 | 29344.74604 | 32853.89284 | 28912.26648 | 29434.10374 | 30539.7582  | 31750.79175 | 32744.30307 | 31943.68087 | 31372.60998 | 29840.02909 | 26463.55037 | 27657.82777 | 28851.81696 | 35791.84646 |
| Q9CWU9 | Nup37    | Nucleoporin Nup37                                             | 59.059   | 10.12 | 36732  | 2  | 1866.59958  | 0.007562416 | 1680.816858 | 1891.524213 | 2080.476522 | 1430.558797 | 1704.538601 | 1657.119479 | 2026.31263  | 0.013320187 | 1504.720452 | 1594.799353 | 2109.817976 | 1719.040932 | 1616.465254 |
| Q9CWZ7 | Napg     | Gamma-soluble NSF attachment protein                          | 82.443   | 15.38 | 34732  | 4  | 14265.37962 | 15062.08226 | 14128.59789 | 14843.73847 | 11183.73504 | 16606.96632 | 18063.865   | 16234.33809 | 11446.90507 | 15791.42291 | 11914.5285  | 11686.06677 | 15013.12989 | 12963.30353 | 15186.22878 |
| Q9CX34 | Sugt1    | Protein SGT1 homolog                                          | 133.637  | 15.18 | 38159  | 3  | 13286.65651 | 19803.67721 | 19297.96673 | 17329.04221 | 17895.67966 | 17711.10779 | 21539.22109 | 21909.40335 | 19709.14591 | 16323.91903 | 17363.37562 | 22317.33675 | 17998.29885 | 14059.20582 | 19053.13774 |
| Q9CX56 | Psmδ8    | 26S proteasome non-ATPase regulatory subunit 8                | 192.496  | 34.28 | 39930  | 10 | 169637.3093 | 131002.3736 | 164979.8075 | 180143.5041 | 153895.3735 | 197544.7667 | 188677.1763 | 196609.7991 | 201039.0049 | 172924.9043 | 173842.1263 | 170970.2327 | 173349.9488 | 130346.4877 | 152564.1594 |
| Q9CX86 | Hnrnpa0  | Heterogeneous nuclear ribonucleoprotein A0                    | 472.942  | 32.79 | 30530  | 10 | 330478.1899 | 296219.6492 | 288942.951  | 297231.186  | 320041.0393 | 231355.151  | 234226.7581 | 251538.1691 | 211104.1762 | 231149.1595 | 281109.1882 | 287148.174  | 292945.5407 | 290237.0107 | 277016.9756 |
| Q9CXF4 | Tbc1d15  | TBC1 domain family member 15                                  | 177.005  | 8.64  | 76527  | 5  | 20123.47332 | 20864.19446 | 16885.48135 | 19406.62391 | 19672.32478 | 16421.62568 | 17664.11094 | 21157.14281 | 18761.37337 | 15690.3843  | 18735.1898  | 14327.96093 | 16780.45852 | 18780.65689 | 16744.73719 |
| Q9CXR1 | Dhrs7    | Dehydrogenase/reductase SDR family member 7                   | 85.807   | 12.13 | 38167  | 3  | 16834.62764 | 32060.60426 | 17095.01099 | 17410.19616 | 30170.41819 | 25672.66394 | 36684.55357 | 31997.89389 | 23899.65693 | 20330.66455 | 28276.83682 | 29588.36095 | 23789.6525  | 25718.05931 | 17527.66222 |
| Q9CXT8 | Pmpcb    | Mitochondrial-processing peptidase subunit beta               | 57.009   | 6.34  | 54614  | 3  | 47811.613   |             |             |             |             |             |             |             |             |             |             |             |             |             |             |



|        |         |                                                                                     |          |       |        |    |             |             |             |             |             |             |             |             |             |             |             |             |             |             |             |
|--------|---------|-------------------------------------------------------------------------------------|----------|-------|--------|----|-------------|-------------|-------------|-------------|-------------|-------------|-------------|-------------|-------------|-------------|-------------|-------------|-------------|-------------|-------------|
| Q9CYI4 | Luc7l   | Putative RNA-binding protein Luc7-like 1                                            | 34.3     | 5.12  | 43934  | 2  | 17203.95102 | 18460.17625 | 18299.54546 | 16349.03642 | 18480.78261 | 15451.8665  | 16219.53396 | 18304.04444 | 15307.30702 | 15938.45946 | 18030.46816 | 18508.91555 | 15416.32738 | 15339.39916 | 15492.00094 |
| Q9CYN2 | Spss2   | Signal peptidase complex subunit 2                                                  | 140.809  | 32.3  | 24978  | 6  | 78188.3394  | 74753.21631 | 84048.77417 | 91444.21229 | 89211.93592 | 109575.6288 | 65862.67966 | 91863.78113 | 100951.5923 | 103450.0062 | 88763.44006 | 86861.24756 | 90441.83518 | 91130.60294 | 81557.43291 |
| Q9CYR6 | Pgm3    | Phosphoacetylglucosamine mutase                                                     | 60.972   | 8.3   | 59453  | 3  | 8896.763153 | 5344.815759 | 5073.714522 | 5351.439855 | 4510.939101 | 7317.812856 | 1906.373854 | 4958.209722 | 2716.460892 | 7724.82761  | 0.008046421 | 10570.95269 | 9211.789271 | 8248.413357 | 6012.823204 |
| Q9CZ04 | Cops7a  | COP9 signalosome complex subunit 7a                                                 | 72.7     | 16.36 | 30224  | 2  | 15153.7025  | 18985.84165 | 13034.49139 | 8593.595207 | 13737.46183 | 11983.67637 | 14132.71284 | 15551.95371 | 9591.452674 | 614.8411795 | 12421.48821 | 11558.04722 | 11733.95419 | 11576.36702 | 14248.02571 |
| Q9CZ13 | Uqcrc1  | Cytochrome b-c1 complex subunit 1, mitochondrial                                    | 452.613  | 36.25 | 52852  | 15 | 266877.1174 | 265201.1912 | 268892.1269 | 248631.6736 | 293467.8568 | 331607.2716 | 287737.1418 | 278864.9971 | 314058.7168 | 277281.9219 | 273024.0801 | 233185.3282 | 302277.7366 | 255513.7477 | 281356.9541 |
| Q9CZ42 | Naxd    | ATP-dependent (S)-NAD(P)H-hydrate dehydratase                                       | 51.309   | 11.37 | 36717  | 2  | 16115.39503 | 10064.28686 | 12846.95582 | 14035.35613 | 8885.33237  | 12928.42978 | 12071.12274 | 11009.37661 | 12167.72664 | 9136.363621 | 16226.51291 | 9931.870467 | 11532.88895 | 9746.120244 | 9631.249223 |
| Q9CZB0 | Sdhc    | Succinate dehydrogenase cytochrome b560 subunit, mitochondrial                      | 155.813  | 38.46 | 18382  | 5  | 73187.82162 | 84720.94908 | 71623.95764 | 79583.2423  | 75503.87679 | 74303.06412 | 72684.76088 | 69506.00632 | 72767.98049 | 85405.29549 | 81009.34566 | 64288.31551 | 79277.47201 | 76668.70126 | 76459.75049 |
| Q9CZD3 | Gars    | Glycine-tRNA ligase                                                                 | 803.059  | 36.63 | 81878  | 22 | 467091.7891 | 512203.5727 | 507391.1568 | 498378.2141 | 503981.1321 | 508063.7022 | 598408.944  | 605507.1112 | 628609.5536 | 549708.8888 | 550306.1251 | 555454.0055 | 526172.3571 | 521049.5038 | 485792.6529 |
| Q9CZN7 | Shmt2   | Serine hydroxymethyltransferase, mitochondrial                                      | 867.461  | 60.52 | 55759  | 23 | 772784.7134 | 782844.9464 | 835945.9477 | 826641.2508 | 760690.1439 | 892420.043  | 917350.2724 | 957290.979  | 954362.826  | 824391.8691 | 784334.023  | 876321.2685 | 802219.9553 | 850189.2431 | 801237.9989 |
| Q9CZR8 | Tsflm   | Elongation factor Ts, mitochondrial                                                 | 138.169  | 13.58 | 35334  | 2  | 6656.118152 | 5461.141783 | 5947.490494 | 5271.855861 | 5094.663727 | 6168.23452  | 16537.06416 | 16643.3261  | 17707.89537 | 4899.971016 | 6312.222047 | 5847.392165 | 4744.612443 | 5175.811643 | 5302.75195  |
| Q9CZU3 | Mttx    | Exosome RNA helicase MTR4                                                           | 272.901  | 13.56 | 117636 | 10 | 45845.29277 | 53744.49274 | 51751.82964 | 43949.6849  | 49814.83536 | 44911.18674 | 51071.49525 | 52756.25863 | 49345.91187 | 43257.29367 | 46120.32228 | 53854.14177 | 49643.93338 | 46052.58192 | 50509.98902 |
| Q9CZU6 | Ctrc    | Citrate synthase, mitochondrial                                                     | 529.968  | 37.93 | 51737  | 16 | 812094.0265 | 813946.6818 | 807543.9325 | 826981.9756 | 832829.6674 | 889433.1324 | 937590.5081 | 934490.0211 | 997085.332  | 911721.0924 | 836375.5696 | 867638.4234 | 858893.113  | 867259.6004 | 897497.2101 |
| Q9CZW4 | Acs13   | Long-chain-fatty-acid-CoA ligase 3                                                  | 370.069  | 22.64 | 80492  | 10 | 53535.97851 | 62615.14586 | 50641.9462  | 50100.6203  | 46810.46014 | 42084.26443 | 52266.4787  | 43058.37213 | 48687.27968 | 40333.59922 | 38789.52592 | 53566.04711 | 44500.9431  | 40121.58936 | 44498.50749 |
| Q9CZX9 | Emc4    | ER membrane protein complex subunit 4                                               | 49.036   | 15.85 | 20117  | 2  | 7122.162136 | 6559.671068 | 20810.96131 | 17763.56452 | 7361.298634 | 21147.64936 | 25802.75868 | 23558.92755 | 13215.11993 | 20077.71753 | 16723.17321 | 32020.7132  | 34003.36579 | 29267.20796 | 27391.99362 |
| Q9CZY3 | Ube2v1  | Ubiquitin-conjugating enzyme E2 variant 1                                           | 106.734  | 28.57 | 16355  | 4  | 96485.03362 | 103324.28   | 98687.10482 | 98098.3799  | 100579.5088 | 96331.68901 | 87473.5713  | 91078.52138 | 93090.13474 | 83945.18989 | 99141.58496 | 112084.2592 | 105850.5549 | 103252.5901 | 95605.85224 |
| Q9D051 | Pdhb    | Pyruvate dehydrogenase E1 component subunit beta, mitochondrial                     | 81.491   | 12.81 | 38937  | 4  | 38771.0228  | 43805.45178 | 36226.67066 | 40680.32402 | 35606.22061 | 41335.36298 | 36764.98227 | 37748.76652 | 33806.30778 | 37600.9429  | 37666.13694 | 36988.83008 | 36455.06632 | 38249.35705 | 40011.30226 |
| Q9D071 | Mms19   | MMS19 nucleotide excision repair protein homolog                                    | 349.104  | 14.55 | 113089 | 9  | 33712.37156 | 33838.59625 | 32941.43876 | 36716.93987 | 29411.43669 | 30982.49509 | 31757.63898 | 35246.61464 | 35355.80579 | 30015.57265 | 29402.59145 | 31876.38736 | 29105.60639 | 33297.54009 | 28627.45258 |
| Q9D0B6 | Pbdc1   | Protein PDBC1                                                                       | 191.829  | 34.34 | 22223  | 6  | 114967.6101 | 132104.2024 | 124272.3966 | 114426.0534 | 125723.2929 | 129777.5096 | 149950.6822 | 134525.1771 | 109141.7301 | 108985.1099 | 101324.1042 | 106004.9307 | 112978.8223 | 92838.43678 | 134375.5881 |
| Q9D0E1 | Hnrnmp  | Heterogeneous nuclear ribonucleoprotein M                                           | 1288.2   | 49.25 | 77649  | 37 | 752409.5286 | 917294.4128 | 921088.6952 | 957201.2289 | 955067.3054 | 761513.169  | 789749.4392 | 655025.3138 | 796806.9159 | 794551.2937 | 879126.9762 | 903887.1318 | 900280.5197 | 918104.6742 | 831162.2804 |
| Q9D0F3 | Lman1   | Protein ERGIC-53                                                                    | 302.23   | 32.3  | 57789  | 9  | 190105.3529 | 93559.86274 | 204831.4209 | 192838.4392 | 202323.6689 | 219154.3982 | 221923.9734 | 221020.1445 | 225648.659  | 222002.72   | 199669.1418 | 104674.588  | 169220.8195 | 202832.1583 | 99396.41788 |
| Q9D0F6 | Rfc5    | Replication factor C subunit 5                                                      | 98.822   | 15.63 | 38096  | 3  | 16532.58334 | 18708.40309 | 19297.61605 | 17395.64621 | 16804.89521 | 15920.62963 | 15660.80409 | 27694.91551 | 17363.62911 | 14540.29272 | 13394.62537 | 16397.05542 | 14034.70463 | 15713.63971 | 16014.31875 |
| Q9D0F9 | Pgm1    | Phosphoglucomutase-1                                                                | 661.559  | 44.48 | 61418  | 17 | 176870.1501 | 172879.3413 | 160053.1765 | 161825.7103 | 165271.7744 | 153971.3142 | 191907.0309 | 189968.9393 | 169068.3086 | 137799.8911 | 176082.5073 | 186107.4451 | 178918.3598 | 141420.7692 | 157103.8971 |
| Q9D0G0 | Mrps30  | 28S ribosomal protein S30, mitochondrial                                            | 101.961  | 9.05  | 49939  | 2  | 3102.694486 | 4169.40272  | 3313.108411 | 3117.938531 | 3079.477777 | 2876.125866 | 3180.495154 | 3772.717739 | 3224.748562 | 2971.976793 | 2298.503371 | 2932.827103 | 2549.059713 | 2440.171366 | 2723.34233  |
| Q9D0I9 | Rars    | Arginine-tRNA ligase, cytoplasmic                                                   | 833.074  | 41.21 | 75674  | 22 | 256000.2897 | 266888.8234 | 240672.7022 | 262968.8232 | 249834.9003 | 248708.9251 | 295801.6586 | 286474.1111 | 287392.3736 | 240855.5265 | 224537.6676 | 264844.5928 | 225454.3591 | 250546.9566 | 256074.2429 |
| Q9D0K2 | Oxct1   | Succinyl-CoA:3-ketoadic coenzyme A transferase 1, mitochondrial                     | 775.214  | 54.42 | 55989  | 19 | 424365.0918 | 446587.6981 | 395768.957  | 438856.3208 | 371537.9357 | 406768.0603 | 357362.8522 | 416212.8406 | 401169.6412 | 397239.023  | 408481.5845 | 386500.3765 | 386810.0608 | 408159.3812 | 382495.1134 |
| Q9D0L8 | Rnmt    | mRNA cap guanine-N7 methyltransferase                                               | 87.993   | 11.18 | 53291  | 4  | 13957.63447 | 15322.58858 | 16068.6056  | 15830.93899 | 14317.2395  | 13389.95937 | 15933.70691 | 12532.5046  | 13980.61458 | 13786.4109  | 14402.63873 | 15316.70046 | 14609.09597 | 16089.06467 | 16391.00019 |
| Q9D0M1 | Prpsap1 | Phosphoribosyl pyrophosphate synthase-associated protein 1                          | 237.635  | 23.6  | 39432  | 6  | 40023.96359 | 44008.61229 | 38522.80694 | 32699.58378 | 52338.26984 | 46129.71644 | 60094.54688 | 57719.07689 | 47588.51314 | 44284.97606 | 46319.1815  | 44459.01895 | 50831.46448 | 40782.60641 | 39554.91555 |
| Q9D0M3 | Cyc1    | Cytochrome c1, heme protein, mitochondrial                                          | 290.737  | 37.54 | 35328  | 8  | 139998.0205 | 136890.1831 | 132550.1711 | 127368.3332 | 131719.752  | 134961.8496 | 131558.7414 | 143909.0234 | 137161.7872 | 132591.5515 | 142961.5723 | 137505.6588 | 146949.8736 | 155886.9875 | 129079.4052 |
| Q9D0R2 | Tars    | Threonine-tRNA ligase, cytoplasmic                                                  | 643.285  | 39.47 | 83356  | 22 | 309372.8027 | 327070.7661 | 319719.5926 | 315266.0879 | 289338.2006 | 284391.832  | 315854.5926 | 329017.0287 | 296602.911  | 284789.9785 | 288633.0423 | 330251.5762 | 277401.7252 | 308012.2246 | 299113.3821 |
| Q9D172 | Gatd3a  | Glutamine amidotransferase-like class 1 domain-containing protein 3A, mitochondrial | 48.883   | 12.41 | 28090  | 3  | 34894.60084 | 37032.07584 | 35745.48785 | 35795.81256 | 35466.24242 | 32915.22701 | 29618.13001 | 25467.82638 | 29725.63625 | 27893.89665 | 26238.30426 | 26983.90456 | 31702.11618 | 35867.59352 | 34081.85451 |
| Q9D1A2 | Cndp2   | Cytosolic non-specific dipeptidase                                                  | 1008.466 | 62.53 | 52767  | 23 | 520077.4833 | 522946.5589 | 482522.4944 | 482973.9515 | 458316.9585 | 455893.5061 | 474047.2144 | 463065.862  | 503672.2148 | 444319.57   | 512172.6882 | 503315.7064 | 511001.0876 | 509087.1964 | 503901.7081 |
| Q9D1E6 | Tbcb    | Tubulin-folding cofactor B                                                          | 49.756   | 11.89 | 27386  | 2  | 12402.50644 | 15886.38179 | 14822.02897 | 17028.95109 | 15727.55622 | 14440.57707 | 15749.42292 | 18301.17343 | 14597.48356 | 13851.20948 | 14822.26562 | 16281.42832 | 16930.50103 | 15579.81123 | 15531.59586 |
| Q9D1G1 | Rab1b   | Ras-related protein Rab-1B                                                          | 440.286  | 61.19 | 22187  | 11 | 233958.7291 | 197048.3076 | 191668.63   | 184045.1667 | 198168.2233 | 217117.605  | 228715.1649 | 251410.8034 | 221902.2774 | 209793.7297 | 206593.0387 | 202316.0652 | 226196.1742 | 209020.1032 | 198108.064  |
| Q9D1J3 | Sarnp   | SAP domain-containing ribonucleoprotein                                             | 233.338  | 31.9  | 23533  | 6  | 129393.4681 | 125507.1744 | 122914.6847 | 110463.4671 | 118590.6832 | 115097.2267 | 115435.9809 | 109368.3635 | 115863.839  | 105835.1921 | 121620.5571 | 124042.4449 | 117677.2004 | 119929.384  | 116618.9529 |
| Q9D1M4 | Eef1e1  | Eukaryotic translation elongation factor 1 epsilon-1                                | 117.73   | 31.61 | 19859  | 3  | 29622.12247 | 21389.57817 | 26165.30161 | 23115.73003 | 22411.45685 | 21766.79218 | 18573.85544 | 27235.13641 | 24286.70745 | 24449.98397 | 20457.84804 | 18986.64222 | 22181.36852 | 25456.80665 | 20247.1887  |
| Q9D1Q6 | Erp44   | Endoplasmic reticulum resident protein 44                                           | 96.402   | 11.58 | 46853  | 4  | 2192.074661 | 7303.973929 | 2470.636425 | 6386.521564 | 6150.621007 | 3877.711362 | 0.012348474 | 2548.400815 | 6828.8211   | 7172.937301 | 7295.395102 | 0.009057159 | 7056.760567 | 2273.091274 | 2902.792517 |
| Q9D1R9 | Rpl34   | 60S ribosomal protein L34                                                           | 137.924  | 36.75 | 13293  | 6  | 309643.7124 | 283130.0756 | 297747.6701 | 308576.4282 | 294596.5433 | 327791.4263 | 361886.0242 | 340989.6257 | 328630.4839 | 291886.3347 | 289946.3791 | 289015.0719 | 283143.3108 | 323234.1134 | 295148.9894 |
| Q9D2C2 | Saal1   | Protein SAAL1                                                                       | 24.228   | 5.91  | 52769  | 2  | 1853.090004 | 1465.299679 | 1031.272092 | 1692.176107 | 1328.239467 | 829.9210641 | 1067.450322 | 1500.176747 | 1335.615481 | 846.0014348 | 1156.97977  | 1380.571628 | 1335.939692 | 1177.219623 | 1004.652192 |
| Q9D2N9 | Vps33a  | Vacuolar protein sorting-associated protein 33A                                     | 222.192  | 20.07 | 67555  | 7  | 20163.45742 | 18745.84272 | 13081.6273  | 16214.95603 | 15841.94228 | 14517.62259 | 9752.445867 | 13543.76047 | 14560.1323  | 10657.24764 | 15795.39775 | 15959.11006 | 14410.74241 | 15116.51915 | 16548.21045 |
| Q9D2R0 | Aacs    | Aceto                                                                               |          |       |        |    |             |             |             |             |             |             |             |             |             |             |             |             |             |             |             |

|        |           |                                                                    |          |       |       |    |             |             |             |             |             |             |             |             |             |             |             |             |             |             |             |
|--------|-----------|--------------------------------------------------------------------|----------|-------|-------|----|-------------|-------------|-------------|-------------|-------------|-------------|-------------|-------------|-------------|-------------|-------------|-------------|-------------|-------------|-------------|
| Q9D5V5 | Cul5      | Cullin-5                                                           | 146.259  | 9.62  | 90974 | 5  | 24450.05063 | 22490.42957 | 20335.33468 | 19927.45776 | 21249.90942 | 22355.107   | 22804.05832 | 22818.03125 | 21207.28651 | 18043.10394 | 21216.53702 | 23284.43306 | 23967.83343 | 21929.68654 | 23597.83033 |
| Q9D662 | Sec23b    | Protein transport protein Sec23B                                   | 641.768  | 33.25 | 86437 | 15 | 125500.4618 | 145592.5184 | 124902.1433 | 108550.4758 | 124647.4996 | 105646.1099 | 115536.2875 | 97499.75455 | 113257.3196 | 98421.98195 | 117130.5738 | 98474.1472  | 124903.7113 | 105356.1434 | 112573.1687 |
| Q9D6F9 | Tubb4a    | Tubulin beta-4A chain                                              | 1728.708 | 70.95 | 49586 | 37 | 4121653.567 | 4659553.525 | 4460502.482 | 4525831.949 | 4061514.043 | 3421584.245 | 3651790.745 | 3257100.297 | 3871426.694 | 3729111.016 | 4256910.433 | 4426066.308 | 4289885.757 | 4397755.018 | 3874891.647 |
| Q9D6K5 | Synj2b    | Synaptojanin-2-binding protein                                     | 154.513  | 33.79 | 15815 | 4  | 24173.46479 | 29400.18422 | 31614.04686 | 27562.07826 | 27900.71044 | 33033.34834 | 29883.66851 | 36791.02083 | 38528.6434  | 40519.73552 | 29489.3198  | 26665.2669  | 29959.05039 | 31650.10861 | 33074.94375 |
| Q9D6K8 | Fundc2    | FUN14 domain-containing protein 2                                  | 56.334   | 22.52 | 16564 | 2  | 3048.212248 | 2756.062131 | 2735.62105  | 5961.584209 | 5717.937884 | 6106.6267   | 3188.704419 | 2280.862324 | 4345.635672 | 6870.285205 | 3634.258278 | 2419.343359 | 3740.957264 | 2767.605541 | 6165.61925  |
| Q9D6K9 | Cers5     | Ceramide synthase 5                                                | 94.804   | 12.56 | 48167 | 4  | 30907.70742 | 31845.73334 | 32422.32327 | 32311.12793 | 32721.96898 | 38846.89448 | 35765.72831 | 38267.30401 | 41143.48228 | 40217.19744 | 32694.33194 | 32151.52122 | 33980.28893 | 33492.93171 | 33240.1898  |
| Q9D6N1 | Ca13      | Carbonic anhydrase 13                                              | 39.131   | 13.36 | 29522 | 2  | 12410.83664 | 14204.66881 | 14263.54243 | 12819.07404 | 12989.07612 | 15587.38652 | 15493.15195 | 13900.93937 | 13545.58093 | 14107.88116 | 14794.57688 | 12197.15322 | 12002.91195 | 3494.915363 | 12960.06404 |
| Q9D6R2 | Idh3a     | Isocitrate dehydrogenase [NAD] subunit alpha, mitochondrial        | 322.657  | 26.23 | 39639 | 10 | 318644.8698 | 306392.0361 | 299074.8742 | 295934.4837 | 302773.0318 | 324588.1543 | 297762.3246 | 315752.9725 | 322394.8762 | 308177.8291 | 323754.382  | 306612.4625 | 308220.4598 | 311332.3833 | 282492.1657 |
| Q9D6U8 | Fam162a   | Protein FAM162A                                                    | 163.641  | 36.13 | 17725 | 6  | 95026.91569 | 92933.70229 | 69260.98565 | 84135.83317 | 94296.44761 | 133105.4226 | 107182.1867 | 124704.6604 | 111861.2292 | 110151.6053 | 102759.5615 | 91621.27393 | 102492.9993 | 101871.1324 | 96035.88205 |
| Q9D6Y9 | Gbe1      | 1,4-alpha-glucan-branching enzyme                                  | 78.516   | 5.7   | 80364 | 3  | 12982.4672  | 15306.39556 | 12896.00916 | 11480.66496 | 10653.17332 | 13331.27492 | 12856.84299 | 13309.03586 | 15859.79572 | 13412.7397  | 13746.56375 | 12104.80869 | 12511.06647 | 13841.55634 | 11005.23602 |
| Q9D6Z1 | Nop56     | Nucleolar protein 56                                               | 516.266  | 34.48 | 64464 | 14 | 203796.3112 | 179579.1576 | 202598.3021 | 201164.7375 | 186112.1704 | 182913.701  | 190008.9346 | 189348.4551 | 199960.7076 | 188980.5247 | 188350.4025 | 183737.8024 | 188100.0851 | 200572.6226 | 202149.8076 |
| Q9D706 | Rpap3     | RNA polymerase II-associated protein 3                             | 57.972   | 4.39  | 74096 | 2  | 5337.970281 | 3435.605908 | 2778.422526 | 7368.340942 | 6327.237614 | 5000.898581 | 4964.328926 | 5016.776346 | 5247.050655 | 6433.998267 | 5646.965091 | 6092.158458 | 6213.03004  | 5840.461111 | 2798.512696 |
| Q9D753 | Exosc8    | Exosome complex component RRP43                                    | 65.434   | 15.22 | 29949 | 2  | 4953.026117 | 4006.435498 | 0.009509917 | 5547.433768 | 2279.086143 | 708.9311039 | 2917.872067 | 1977.039193 | 2440.309282 | 2439.828466 | 5908.389805 | 2204.859905 | 4141.91712  | 2706.092052 | 5181.232033 |
| Q9D771 | Tmem206   | Transmembrane protein 206                                          | 38.178   | 8.86  | 40178 | 2  | 8883.763487 | 11757.72537 | 11800.43577 | 4202.386823 | 10069.56648 | 11091.31886 | 10474.23968 | 6209.345094 | 10086.40179 | 8172.891192 | 7954.05351  | 11811.97147 | 8338.9637   | 9232.954859 | 8487.280508 |
| Q9D7H3 | RtcA      | RNA 3'-terminal phosphate cyclase                                  | 36.038   | 5.46  | 39254 | 2  | 15157.98944 | 16995.90918 | 19080.59141 | 16425.26549 | 16669.53557 | 19484.47441 | 18774.27117 | 18218.20417 | 18222.33651 | 19631.50126 | 18427.71996 | 19010.43424 | 15669.08989 | 20389.31974 | 19831.27884 |
| Q9D7J6 | Dnase11   | Deoxyribonuclease-1-like 1                                         | 69.847   | 15.29 | 35604 | 3  | 10409.75148 | 6806.17886  | 6249.972439 | 7030.376006 | 7942.755273 | 15451.81879 | 7547.793324 | 5245.441209 | 9111.674095 | 5336.652964 | 7087.922163 | 5479.306352 | 9494.350804 | 6059.217878 | 6128.429913 |
| Q9D7N3 | Mmps9     | 28S ribosomal protein S9, mitochondrial                            | 58.88    | 10.26 | 44929 | 3  | 12224.01348 | 12815.41806 | 8731.817205 | 10361.62753 | 10753.8593  | 10599.63097 | 12014.53894 | 10398.08949 | 12499.70718 | 14004.29173 | 12414.2404  | 13060.61865 | 11641.37816 | 9912.527611 | 11785.98148 |
| Q9D7N9 | Apmap     | Adipocyte plasma membrane-associated protein                       | 144.322  | 16.39 | 46434 | 4  | 31443.43722 | 29273.83138 | 26421.88869 | 11892.8178  | 26737.21021 | 36212.83171 | 29712.38282 | 30622.18961 | 33369.04021 | 34983.17652 | 27838.76956 | 30665.35684 | 31542.42029 | 30236.22272 | 28268.52113 |
| Q9D7S7 | Rpl22i1   | 60S ribosomal protein L22-like 1                                   | 159.879  | 45.08 | 14467 | 4  | 139328.9233 | 171224.9418 | 159173.4418 | 164198.66   | 174055.1257 | 191749.9878 | 185939.5814 | 211690.58   | 195176.0852 | 183766.5107 | 158370.6775 | 171814.9396 | 151295.2405 | 157193.1966 | 164624.4303 |
| Q9D7X3 | Dusp3     | Dual specificity protein phosphatase 3                             | 374.275  | 50.81 | 20472 | 7  | 148291.3346 | 148317.1293 | 141640.4729 | 152753.3703 | 133051.6464 | 149219.417  | 139241.9743 | 133530.9138 | 139663.2779 | 143008.0975 | 162657.199  | 165191.2034 | 155718.688  | 140916.6045 | 142555.0748 |
| Q9D819 | Ppa1      | Inorganic pyrophosphatase                                          | 187.747  | 12.46 | 32667 | 3  | 20471.47815 | 18887.51134 | 21594.70214 | 20302.19593 | 14030.22512 | 19661.86179 | 22252.32078 | 20292.42184 | 18175.99974 | 8994.816655 | 7669.884099 | 10874.13658 | 17990.82119 | 19875.18801 | 17482.38461 |
| Q9D880 | Timm50    | Mitochondrial import inner membrane translocase subunit TIM50      | 274.972  | 18.41 | 39776 | 5  | 68079.99953 | 66519.02366 | 70995.93695 | 72879.48653 | 67219.12623 | 61140.06012 | 67467.59849 | 65018.70561 | 65882.04496 | 64791.44044 | 67393.08766 | 66883.64455 | 68467.46423 | 65401.54354 | 67337.03066 |
| Q9D883 | U2af1     | Splicing factor U2AF 35 kDa subunit                                | 181.985  | 22.59 | 27815 | 5  | 84749.36009 | 87296.8818  | 95142.88221 | 99152.24976 | 89433.36175 | 81234.56454 | 90598.33414 | 83250.50279 | 77687.90063 | 84685.96544 | 92210.1003  | 91570.68064 | 88432.33321 | 88220.03617 | 89383.53105 |
| Q9D8B3 | Chmp4b    | Charged multivesicular body protein 4b                             | 104.393  | 10.71 | 24936 | 2  | 14504.93359 | 15369.27515 | 25240.22201 | 22220.4767  | 24625.10553 | 28091.85211 | 25564.35441 | 24145.78246 | 25010.96452 | 23764.49219 | 14376.29173 | 27548.16106 | 25689.79448 | 22962.51977 | 22692.73656 |
| Q9D8C4 | Ifi35     | Interferon-induced 35 kDa protein homolog                          | 95.421   | 11.54 | 31876 | 2  | 5421.568358 | 2601.522767 | 3424.247298 | 4108.694553 | 2552.909748 | 2630.29268  | 2874.808122 | 3695.877152 | 3729.042672 | 2424.354738 | 3493.323688 | 3519.197795 | 3250.703991 | 2643.661582 | 2733.390691 |
| Q9D8E6 | Rpl4      | 60S ribosomal protein L4                                           | 384.919  | 37.47 | 47154 | 12 | 109170.6515 | 133289.1271 | 119445.8947 | 124354.0574 | 106323.2062 | 226246.9124 | 314981.6049 | 242831.1439 | 260499.9743 | 261649.7768 | 124665.9102 | 143168.4213 | 145259.6997 | 107633.9108 | 183453.3997 |
| Q9D8M4 | Rpl7i1    | 60S ribosomal protein L7-like 1                                    | 68.976   | 20.73 | 28544 | 3  | 12183.67976 | 7610.918694 | 7249.820197 | 6565.662428 | 7556.468458 | 7499.564929 | 6064.422439 | 6199.001076 | 6691.544763 | 5501.142687 | 5935.481058 | 7633.397755 | 6189.226534 | 5422.894544 | 6187.334683 |
| Q9D8N0 | Eef1g     | Elongation factor 1-gamma                                          | 743.63   | 64.76 | 50061 | 22 | 1091622.334 | 1208240.994 | 1186566.01  | 1207654.385 | 1163414.496 | 1233733.052 | 1423566.089 | 1414674.557 | 1326436.989 | 1156501.265 | 1020499.115 | 1289647.058 | 1105908.765 | 1174696.019 | 1204234.253 |
| Q9D8N2 | Fam45a    | Protein FAM45A                                                     | 98.163   | 11.2  | 40421 | 4  | 24655.0797  | 23267.53396 | 25762.34025 | 20140.3122  | 21300.74032 | 21281.30283 | 24390.95918 | 23530.08037 | 24658.74436 | 21842.25934 | 23515.88023 | 22369.64864 | 23921.925   | 26021.21064 | 17953.31087 |
| Q9D8T2 | Gsdmdc1   | Gasdermin-D                                                        | 125.849  | 10.47 | 53238 | 5  | 73452.02684 | 73776.22783 | 69398.57038 | 80269.65355 | 69351.74677 | 70770.07461 | 83044.2539  | 71821.19572 | 85015.49603 | 67489.73068 | 61969.87644 | 71860.31817 | 71252.44485 | 77237.71286 | 65863.09562 |
| Q9D8U8 | Snx5      | Sorting nexin-5                                                    | 756.615  | 58.66 | 46797 | 23 | 691269.1011 | 665168.7971 | 604437.2017 | 674641.6535 | 658027.4485 | 512366.9594 | 533513.8105 | 518518.2893 | 516594.0921 | 574943.9296 | 640394.9474 | 582502.5601 | 665874.9585 | 680936.4995 | 632299.5947 |
| Q9D8V0 | Hm13      | Minor histocompatibility antigen H13                               | 110.963  | 20.63 | 41748 | 5  | 73272.04284 | 78469.61426 | 66669.98011 | 77236.03589 | 74023.46146 | 89203.52327 | 85995.36016 | 73513.50553 | 90043.19394 | 95876.50755 | 67106.07183 | 81688.26906 | 79807.13599 | 81327.036   | 78809.78825 |
| Q9D8W5 | Psmd12    | 26S proteasome non-ATPase regulatory subunit 12                    | 597.035  | 43.42 | 52895 | 17 | 227030.3778 | 239097.8043 | 215559.1023 | 228923.834  | 232975.0278 | 225277.2095 | 243718.0423 | 255438.7919 | 245552.2206 | 219719.6    | 227598.333  | 229763.4428 | 245459.8775 | 225657.6249 | 219849.7713 |
| Q9D8Y7 | Tnfrsf8l2 | Tumor necrosis factor alpha-induced protein 8-like protein 2       | 144.152  | 29.89 | 20615 | 4  | 62608.36775 | 57430.05872 | 60561.8362  | 66412.57451 | 40425.73298 | 30146.53296 | 44606.63377 | 39973.58349 | 49555.48915 | 46978.60424 | 53032.70471 | 54529.43452 | 43237.3084  | 59871.92532 | 62593.38957 |
| Q9D906 | Atg7      | Ubiquitin-like modifier-activating enzyme ATG7                     | 601.598  | 29.94 | 77520 | 16 | 150148.3147 | 151390.4043 | 124714.2654 | 129224.1152 | 122592.169  | 134211.3924 | 146328.4302 | 142420.003  | 150050.9306 | 133656.5137 | 132981.5482 | 123664.1636 | 134993.6367 | 121991.9441 | 138565.6099 |
| Q9D964 | Gatm      | Glycine amidinotransferase, mitochondrial                          | 445.082  | 51.54 | 48297 | 15 | 339687.3749 | 308252.7836 | 301052.2333 | 309414.2268 | 321063.1954 | 260286.5893 | 265087.1508 | 222447.2457 | 261917.3315 | 274804.7135 | 277046.9044 | 233637.371  | 282168.9218 | 318138.1676 | 262472.9398 |
| Q9DAR7 | Dcps      | m7GpppX diphosphatase                                              | 396.432  | 47.93 | 38988 | 11 | 205009.0869 | 226877.3338 | 206731.7117 | 202685.1964 | 200822.3575 | 150851.3205 | 160544.7345 | 158106.5902 | 150253.8227 | 171939.7299 | 199841.9467 | 186550.3402 | 185933.0581 | 191239.6694 | 190632.0703 |
| Q9DAS9 | Gng12     | Guanine nucleotide-binding protein G(i)/G(s)/G(o) subunit gamma-12 | 95.198   | 37.5  | 7997  | 2  | 23526.54578 | 23889.26284 | 19300.63545 | 21074.82702 | 24268.37173 | 16959.32927 | 17927.23685 | 18272.19433 | 18305.71188 | 23142.65591 | 27170.2025  | 22793.04141 | 15765.09262 | 24100.5335  | 20162.44827 |
| Q9DAW6 | Prpf4     | U4/U6 small nuclear ribonucleoprotein Prp4                         | 26.097   | 5.18  | 58370 | 2  | 3648.408265 | 4608.55031  | 3390.313535 | 4944.36382  | 5685.112091 | 2937.290949 | 3030.670006 | 15487.94801 | 2997.488571 | 0.013320187 | 2297.587085 | 3223.624733 | 2851.398664 | 3512.021598 | 3802.024257 |
| Q9DB16 | Cab39l    | Calcium-binding protein 39-like 1                                  | 28.824   | 5.34  | 39106 | 2  | 10922.      |             |             |             |             |             |             |             |             |             |             |             |             |             |             |

|        |          |                                                                                 |          |       |        |    |             |             |             |             |             |             |             |             |             |             |             |             |             |             |             |
|--------|----------|---------------------------------------------------------------------------------|----------|-------|--------|----|-------------|-------------|-------------|-------------|-------------|-------------|-------------|-------------|-------------|-------------|-------------|-------------|-------------|-------------|-------------|
| Q9DBC7 | Prkar1a  | cAMP-dependent protein kinase type I-alpha regulatory subunit                   | 390.797  | 36.48 | 43185  | 11 | 182486.7792 | 184421.2665 | 163018.349  | 177498.0442 | 166918.9286 | 144450.6972 | 161187.5837 | 161366.8852 | 143138.617  | 152472.1169 | 166624.5672 | 163264.2565 | 153662.5614 | 162931.0576 | 167681.437  |
| Q9BD5  | Pelp1    | Proline-, glutamic acid- and leucine-rich protein 1                             | 106.259  | 4.1   | 118069 | 4  | 16466.57831 | 19628.50141 | 22728.88342 | 20850.13957 | 20192.25144 | 23760.49675 | 23832.49326 | 24153.26547 | 23788.61816 | 23408.35368 | 17710.47005 | 23961.70707 | 22585.71887 | 20880.37327 | 21047.80026 |
| Q9DBG1 | Cyp27a1  | Sterol 28-hydroxylase, mitochondrial                                            | 84.312   | 9.76  | 60720  | 3  | 3882.680393 | 9873.679004 | 6742.637279 | 8620.384596 | 7486.227255 | 6355.399033 | 9884.458834 | 7128.080943 | 8330.252187 | 8466.239204 | 9098.498445 | 8393.628547 | 8978.568999 | 8614.152705 | 8630.183652 |
| Q9DBG5 | Plin3    | Perilipin-3                                                                     | 782.967  | 66.82 | 47262  | 19 | 315108.1379 | 269660.3242 | 265687.1897 | 243775.6109 | 171803.7537 | 171791.4814 | 193872.9203 | 162083.1714 | 191440.8565 | 171356.692  | 280040.4626 | 219768.6318 | 189281.8519 | 201163.4737 | 203304.9526 |
| Q9DBG6 | Rpn2     | Dolichyl-<br>diphosphooligosaccharide--protein<br>glycosyltransferase subunit 2 | 1215.901 | 54.36 | 69063  | 23 | 428064.6722 | 438585.6035 | 399526.1733 | 429523.3288 | 413754.0248 | 467918.6472 | 492544.5865 | 503378.8802 | 517681.6452 | 485466.1601 | 425454.2862 | 430167.5869 | 463780.7691 | 379817.2184 | 404797.3192 |
| Q9DBG7 | Srpra    | Signal recognition particle receptor subunit alpha                              | 79.018   | 6.92  | 69623  | 3  | 12148.17695 | 10597.70846 | 2557.543994 | 9666.234328 | 10342.9298  | 9703.5504   | 3525.267082 | 10900.69329 | 11906.9657  | 10181.3207  | 2950.333868 | 12384.48245 | 10650.60378 | 9071.033389 | 9246.467234 |
| Q9DBL1 | Acadsb   | Short/branched chain specific acyl-CoA dehydrogenase, mitochondrial             | 184.214  | 10.42 | 47874  | 3  | 19535.63791 | 27819.58262 | 22676.20799 | 24857.05665 | 24922.52354 | 27266.98021 | 26945.28427 | 28843.61426 | 27762.38796 | 24991.78257 | 17305.32069 | 17265.26453 | 11643.45576 | 11562.80308 | 26004.39712 |
| Q9DBL7 | Coasy    | Bifunctional coenzyme A synthase                                                | 140.069  | 17.41 | 62023  | 7  | 67841.66336 | 62754.66865 | 62494.27996 | 61465.18597 | 65058.4679  | 60434.10197 | 64135.12813 | 53234.73398 | 68685.07655 | 58727.34543 | 38348.65448 | 59846.73433 | 66268.49064 | 68198.27962 | 67596.13432 |
| Q9DBP5 | Cmpk1    | UMP-CMP kinase                                                                  | 274.558  | 42.86 | 22165  | 8  | 126093.4819 | 117765.5597 | 119006.9645 | 115942.9723 | 110115.8468 | 89070.44775 | 107713.0599 | 92997.40797 | 97209.61508 | 96887.50973 | 114948.8592 | 119060.2645 | 120724.6607 | 112875.5315 | 117061.1769 |
| Q9DBQ7 | Scyl3    | Protein-associating with the carboxyl-terminal domain of ezrin                  | 45.049   | 3.95  | 81333  | 2  | 3088.971683 | 2865.277139 | 2612.054556 | 1012.756446 | 679.2952721 | 720.1925421 | 3034.718947 | 3255.821266 | 3321.682639 | 3326.195129 | 3020.770747 | 2930.379134 | 2194.354195 | 2523.245121 | 790.2845521 |
| Q9DBR1 | Xm2      | 5'-3' exonuclease 2                                                             | 356.657  | 18.72 | 108687 | 13 | 142853.7105 | 165816.7256 | 154540.9613 | 155094.5421 | 151548.5805 | 122122.3343 | 112818.2155 | 120142.047  | 138246.0295 | 120679.3616 | 156956.4224 | 153431.9672 | 139537.492  | 147670.5113 | 149244.4333 |
| Q9DBR3 | Armc8    | Armadillo repeat-containing protein 8                                           | 79.415   | 9.81  | 75364  | 4  | 12679.92418 | 13185.189   | 11790.07352 | 12071.21869 | 10903.21968 | 10080.94005 | 11770.47215 | 10870.42796 | 12360.64474 | 10059.40349 | 9426.488664 | 10562.36424 | 10819.90032 | 10367.848   | 10453.00509 |
| Q9DBR7 | Ppp1r12a | Protein phosphatase 1 regulatory subunit 12A                                    | 35.473   | 2.04  | 114996 | 2  | 10206.41836 | 10503.66132 | 9578.511309 | 8267.247812 | 10290.47466 | 10293.85993 | 10827.97178 | 6639.047242 | 10812.92601 | 9661.334699 | 10092.96465 | 9364.4445   | 10111.00557 | 9959.071717 | 10937.19658 |
| Q9DBS1 | Tmem43   | Transmembrane protein 43                                                        | 323.038  | 39    | 44783  | 12 | 153865.664  | 137669.8076 | 120801.7046 | 131034.115  | 122269.1475 | 183788.7207 | 163469.7546 | 142555.9782 | 167571.8053 | 162111.6032 | 159009.7564 | 137798.0964 | 152078.1858 | 146368.0613 | 132779.224  |
| Q9DBZ5 | Eif3k    | Eukaryotic translation initiation factor 3 subunit K                            | 122.338  | 27.98 | 25087  | 4  | 21685.47136 | 25908.25201 | 22568.33462 | 24240.06378 | 24083.94388 | 21233.09612 | 28929.06663 | 30032.43592 | 25482.8963  | 23293.04415 | 23785.41522 | 21353.23836 | 20010.73571 | 25460.99581 | 25843.3289  |
| Q9DC16 | Ergic1   | Endoplasmic reticulum-Golgi intermediate compartment protein 1                  | 128.824  | 17.59 | 32562  | 4  | 44697.59148 | 51058.30756 | 41656.63382 | 41641.53822 | 44038.70686 | 65963.71128 | 54767.60656 | 49662.29789 | 59286.35843 | 62206.93789 | 49203.47337 | 51518.07392 | 50805.59622 | 49419.69604 | 50264.75278 |
| Q9DC23 | Dnajc10  | DnaJ homolog subfamily C member 10                                              | 66.229   | 6.81  | 90583  | 4  | 13134.92381 | 11979.61894 | 15606.26551 | 9435.89862  | 11149.91218 | 11355.92685 | 14743.95304 | 11342.49128 | 8616.895802 | 6983.24039  | 7880.779261 | 14010.04444 | 4443.801647 | 13606.30625 | 10754.10926 |
| Q9DC50 | Crot     | Peroxisomal carnitine O-octanoyltransferase                                     | 63.466   | 6.54  | 70264  | 2  | 2658.638961 | 2408.318397 | 1852.484372 | 2331.643047 | 1564.835338 | 1069.345106 | 1533.74204  | 1640.714273 | 1068.803423 | 1127.148355 | 1490.486575 | 1825.328379 | 1415.018018 | 1121.532029 | 1294.305146 |
| Q9DC53 | Cpne8    | Copine-8                                                                        | 25.264   | 5.2   | 64667  | 2  | 12733.5568  | 12822.00398 | 13883.24796 | 14853.36125 | 13616.11592 | 16920.20813 | 15440.73267 | 14954.75693 | 15531.72421 | 19596.92705 | 12785.9951  | 14138.12287 | 15934.99747 | 15681.52362 | 14941.55459 |
| Q9DC61 | Pmpca    | Mitochondrial-processing peptidase subunit alpha                                | 145.997  | 10.5  | 58279  | 3  | 22199.05382 | 21733.88929 | 20849.15552 | 19602.72274 | 17634.00736 | 17355.64604 | 20887.50876 | 24853.59624 | 23174.53742 | 23786.86677 | 18561.18594 | 20407.91319 | 18964.47679 | 21043.41238 | 18029.9404  |
| Q9DC69 | Ndufa9   | NADH dehydrogenase [ubiquinone] 1 alpha subcomplex subunit 9, mitochondrial     | 175.187  | 22.02 | 42525  | 5  | 22647.90735 | 31271.9048  | 28770.25345 | 20264.89247 | 32936.04233 | 18005.02801 | 17903.32866 | 35648.83651 | 19551.80964 | 18034.03289 | 33730.70491 | 33603.07594 | 34220.97459 | 32062.5114  | 17966.82474 |
| Q9DC70 | Ndufs7   | NADH dehydrogenase [ubiquinone] iron-sulfur protein 7, mitochondrial            | 121.819  | 26.34 | 24683  | 4  | 35733.87213 | 36724.13049 | 35412.33642 | 30270.88294 | 40367.62813 | 40372.19941 | 36891.68687 | 38238.81267 | 30401.86185 | 35484.97127 | 30183.29141 | 33707.85822 | 33536.39542 | 37480.71976 | 36255.80405 |
| Q9DCD0 | Pgd      | 6-phosphogluconate dehydrogenase, decarboxylating                               | 927.981  | 65.63 | 53247  | 26 | 1240975.335 | 1300887.846 | 1194093.395 | 1199735.613 | 1298398.353 | 1085546.674 | 1231885.863 | 1171810.127 | 1141856.197 | 1079662.329 | 1182057.213 | 1256914.339 | 1216214.351 | 1223287.155 | 1200731.189 |
| Q9DCG9 | Trmt112  | Multifunctional methyltransferase subunit TRM112-like protein                   | 42.929   | 20    | 14141  | 2  | 20419.14221 | 23479.07741 | 18968.24125 | 19881.37755 | 19688.8193  | 18004.50458 | 18226.65957 | 8422.582167 | 17219.16768 | 16621.16899 | 20081.31578 | 16468.73265 | 16671.20401 | 16655.53369 | 16764.64862 |
| Q9DCH4 | Eif3f    | Eukaryotic translation initiation factor 3 subunit F                            | 457.119  | 33.24 | 37984  | 9  | 134323.6836 | 163335.134  | 176201.1867 | 193391.6402 | 148879.2536 | 163862.638  | 181375.5606 | 185293.0271 | 189025.9554 | 157776.6149 | 143432.3201 | 209690.2595 | 143212.7567 | 179304.9934 | 127670.3471 |
| Q9DCJ5 | Ndufa8   | NADH dehydrogenase [ubiquinone] 1 alpha subcomplex subunit 8                    | 35.209   | 18.02 | 19992  | 2  | 21063.68998 | 21067.44195 | 16418.93194 | 16663.44707 | 16673.49595 | 18684.76727 | 20454.8985  | 10923.25168 | 20615.87118 | 20123.99519 | 16577.26846 | 19480.07966 | 18787.22428 | 19174.79476 | 20932.82165 |
| Q9DCL9 | Paics    | Multifunctional protein ADE2                                                    | 428.915  | 45.41 | 47006  | 13 | 180300.8774 | 178414.349  | 190146.4536 | 181035.0638 | 186874.8282 | 151138.1325 | 157589.9669 | 148399.1917 | 165641.7984 | 141420.9306 | 167594.8851 | 175248.2189 | 137899.4961 | 176051.7288 | 153330.2915 |
| Q9DCN2 | Cyb5r3   | NADH-cytochrome b5 reductase 3                                                  | 497.727  | 52.82 | 34128  | 14 | 283453.2653 | 294919.0044 | 278342.0178 | 270390.9974 | 282047.4155 | 368462.4353 | 338930.0133 | 359832.9712 | 331704.0625 | 306692.6282 | 308968.8905 | 276042.593  | 313825.1148 | 302521.3254 | 316822.8567 |
| Q9DCS3 | Mecr     | Enoyl[acyl-carrier-protein] reductase, mitochondrial                            | 76.994   | 8.58  | 40343  | 2  | 5608.593063 | 6161.214456 | 5579.835278 | 5509.469985 | 4457.45639  | 3686.862173 | 5527.403106 | 4250.92626  | 5408.13918  | 4482.433973 | 4789.179894 | 5370.261006 | 4769.815671 | 4898.041407 | 4357.815283 |
| Q9DCS9 | Ndufb10  | NADH dehydrogenase [ubiquinone] 1 beta subcomplex subunit 10                    | 76.028   | 18.75 | 21024  | 2  | 3320.594437 | 3747.540204 | 714.2450138 | 695.3834342 | 3542.687709 | 2803.860373 | 4121.447151 | 3287.144727 | 3660.227421 | 3726.557056 | 3572.407694 | 4898.169567 | 3509.164873 | 2915.86175  | 2742.065571 |
| Q9DCT2 | Ndufs3   | NADH dehydrogenase [ubiquinone] iron-sulfur protein 3, mitochondrial            | 139.65   | 23.95 | 30149  | 5  | 44412.19935 | 46316.00364 | 43172.52417 | 52824.48394 | 40107.07999 | 49220.51067 | 48015.09355 | 50636.72109 | 44612.58037 | 55215.53809 | 44196.31038 | 44935.25345 | 54265.57501 | 48962.92174 | 49045.368   |
| Q9DCW4 | Etfb     | Electron transfer flavoprotein subunit beta                                     | 409.696  | 48.24 | 27623  | 11 | 358763.4239 | 361350.3797 | 360130.5033 | 383215.3084 | 367634.9624 | 418180.756  | 380020.2771 | 361685.4671 | 376775.9414 | 418531.4217 | 365967.1289 | 368034.35   | 374743.4925 | 392506.8696 | 367464.9254 |
| Q9DCX2 | Atp5pd   | ATP synthase subunit d, mitochondrial                                           | 201.244  | 54.04 | 18749  | 6  | 124171.9416 | 136593.1616 | 133547.9992 | 130142.8396 | 133051.1917 | 137383.5841 | 120433.964  | 119822.1191 | 114113.4275 | 122074.4647 | 116898.7967 | 107086.8265 | 119856.6587 | 123263.453  | 119692.6398 |
| Q9EP69 | Sacm11   | Phosphatidylinositol phosphate SAC1                                             | 204.235  | 15.67 | 66944  | 9  | 75397.61273 | 66983.19717 | 65187.14147 | 65539.49003 | 56249.32712 | 66031.29953 | 91975.42363 | 73503.25045 | 94070.472   | 92704.39828 | 63167.4494  | 62832.63073 | 63949.26129 | 71829.92538 | 54315.61353 |
| Q9EP89 | Lactb    | Serine beta-lactamase-like protein LACTB, mitochondrial                         | 133.758  | 8.89  | 60705  | 3  | 19403.87258 | 19688.14807 | 17869.54384 | 20970.14346 | 17101.42464 | 18582.21625 | 21456.70859 | 23451.99911 | 22154.02591 | 21368.6934  | 22734.56673 | 18049.14357 | 22881.52605 | 19129.34523 | 23245.65128 |
| Q9EP97 | Senp3    | Sentrin-specific protease 3                                                     | 71.384   | 5.28  | 64403  | 2  | 6781.59391  | 4201.335966 | 6215.820518 | 0.009171104 | 6073.190036 | 4044.494639 | 6800.506089 | 8339.627624 | 8029.736845 | 6693.202445 | 6032.833215 | 5742.458724 | 3043.980212 | 5950.455504 | 5790.641479 |
| Q9EPB4 | Pycard   | Apoptosis-associated speck-like protein containing a CARD                       | 197.84   | 36.79 | 21459  | 6  | 121435.846  | 113066.2141 | 120104.6372 | 121097.3618 | 114661.8874 | 99588.12427 | 109085.4199 | 108018.9774 | 106599.748  | 98520.19168 | 111106.5887 | 86345.09816 | 91535.02293 | 94924.2027  | 112737.2363 |
| Q9EPE9 | Atp13a1  | Manganese-transporting ATPase 13A1                                              | 104.953  | 4.08  | 132388 | 3  | 7144.243183 | 11186.44253 | 9200.744721 | 6460.426903 | 5113.055759 | 11571.79016 | 13700.81724 | 5514.590114 | 6442.753143 | 12432.80105 | 11636.84651 | 6666.64276  | 12567.46594 | 11474.70191 | 11533.37898 |

|        |          |                                                               |          |       |        |    |             |             |             |             |             |             |             |             |             |             |             |             |             |             |             |
|--------|----------|---------------------------------------------------------------|----------|-------|--------|----|-------------|-------------|-------------|-------------|-------------|-------------|-------------|-------------|-------------|-------------|-------------|-------------|-------------|-------------|-------------|
| Q9EPK6 | Sil1     | Nucleotide exchange factor SIL1                               | 144.397  | 13.98 | 52430  | 4  | 18492.75864 | 17384.66839 | 13199.51224 | 11469.47048 | 10678.47925 | 17843.40906 | 19053.71405 | 20450.87388 | 20563.09095 | 20053.05188 | 16030.98287 | 15871.60318 | 12728.33049 | 16558.28942 | 15264.24272 |
| Q9EPK7 | Xpo7     | Exportin-7                                                    | 133.268  | 3.96  | 123810 | 3  | 4893.946099 | 4738.025484 | 3599.363203 | 6413.403215 | 5510.040166 | 4442.534807 | 4641.935767 | 6132.099164 | 8016.231364 | 5822.794831 | 5826.71811  | 6507.419617 | 6380.322558 | 6663.161065 | 5779.634831 |
| Q9EPL8 | Ipo7     | Importin-7                                                    | 529.681  | 25.34 | 119486 | 17 | 129005.5223 | 144715.1205 | 137630.6923 | 143130.4247 | 130686.4783 | 134511.7701 | 157027.8396 | 163401.8756 | 144853.7813 | 128478.3976 | 122952.3283 | 143005.4106 | 130020.1416 | 132409.218  | 138102.7583 |
| Q9EPL9 | Acox3    | Peroxisomal acyl-coenzyme A oxidase 3                         | 28.909   | 3.71  | 78404  | 2  | 3898.683207 | 3186.13036  | 3187.82628  | 3058.212544 | 3379.513206 | 3341.867265 | 4680.865072 | 2859.535115 | 2274.019947 | 4034.204289 | 1926.965278 | 3548.468542 | 3332.030152 | 4056.117771 | 4146.226773 |
| Q9EPU0 | Upf1     | Regulator of nonsense transcripts 1                           | 301.157  | 12.63 | 123967 | 11 | 88860.30665 | 90498.8313  | 101673.6088 | 90088.72317 | 91775.17051 | 99077.34839 | 98214.68157 | 89345.28153 | 98238.7934  | 95312.29107 | 88679.95845 | 97053.2872  | 95763.62207 | 94297.73911 | 91826.82811 |
| Q9EPU4 | Cpsf1    | Cleavage and polyadenylation specificity factor subunit 1     | 85.87    | 2.15  | 160818 | 3  | 11118.45365 | 11677.73675 | 13688.79274 | 10617.79365 | 11907.15165 | 6645.070441 | 11568.68883 | 8269.272384 | 14626.52145 | 12303.1257  | 11727.55281 | 8644.916039 | 12859.49811 | 14812.0652  | 10245.04045 |
| Q9EQ06 | Hsd17b11 | Estradiol 17-beta-dehydrogenase 11                            | 105.857  | 25.17 | 32881  | 5  | 25052.31298 | 22278.56093 | 25368.69862 | 57019.64021 | 23411.23935 | 25368.28414 | 22060.28966 | 26871.0864  | 27261.68564 | 26884.2115  | 54012.0869  | 26339.79108 | 23456.10258 | 24766.46076 | 23883.25204 |
| Q9EQ32 | Pik3ap1  | Phosphoinositide 3-kinase adapter protein 1                   | 749.784  | 26.63 | 90928  | 18 | 266975.6689 | 270043.9807 | 263223.2842 | 283160.512  | 302728.7929 | 178296.6168 | 179752.9588 | 195094.6584 | 181336.6559 | 171775.4654 | 245921.707  | 235744.6097 | 233561.0089 | 242611.8206 | 233880.3655 |
| Q9EQ80 | Nif31    | NIF3-like protein 1                                           | 100.567  | 21.81 | 41746  | 6  | 47152.91813 | 45981.43102 | 45272.27591 | 38118.24324 | 48915.21233 | 34017.11117 | 38433.15616 | 49812.12823 | 41899.5398  | 41585.0874  | 34013.45614 | 47565.6654  | 37907.79244 | 27532.58667 | 34798.88859 |
| Q9EQH2 | Erap1    | Endoplasmic reticulum aminopeptidase 1                        | 221.718  | 10.32 | 106599 | 7  | 60844.84711 | 68020.6623  | 60538.69857 | 63905.74504 | 60246.6841  | 61530.461   | 61986.72209 | 60871.03749 | 68995.9096  | 61706.61835 | 52738.0488  | 57602.78232 | 61235.80225 | 64220.9621  | 57646.07306 |
| Q9EQH3 | Vps35    | Vacuolar protein sorting-associated protein 35                | 1279.333 | 44.1  | 91713  | 28 | 346348.6664 | 358819.8744 | 328192.1302 | 361310.1273 | 353724.7451 | 314518.529  | 356612.9788 | 344909.134  | 327825.1745 | 333804.1903 | 304512.5895 | 350149.2497 | 348958.8298 | 354959.225  | 348245.5237 |
| Q9EQK5 | Mvp      | Major vault protein                                           | 1063.413 | 46.34 | 95924  | 28 | 367148.0339 | 390699.0563 | 356962.2173 | 400198.5048 | 400059.6787 | 527935.3043 | 568944.2994 | 598058.3568 | 596757.4558 | 511775.554  | 410423.1214 | 452915.4761 | 452119.8119 | 382386.8463 | 450431.1419 |
| Q9EQP2 | Ehd4     | EH domain-containing protein 4                                | 669.126  | 44.92 | 61481  | 20 | 420168.3446 | 462979.1434 | 417262.5497 | 432866.1594 | 426592.2593 | 378158.824  | 392368.9981 | 377937.3958 | 394674.7    | 379204.6888 | 445849.9998 | 440088.4733 | 443998.4055 | 466167.6322 | 450421.6932 |
| Q9EQV6 | Tpp1     | Tripeptidyl-peptidase 1                                       | 73.575   | 6.22  | 61332  | 2  | 12148.68595 | 16234.89761 | 9425.062847 | 11115.7284  | 7988.109546 | 3890.292613 | 5557.651126 | 4377.200968 | 0.012083387 | 4596.311581 | 10086.56171 | 8186.427321 | 9518.221765 | 7454.961499 | 8307.199631 |
| Q9ER00 | Str12    | Syntaxin-12                                                   | 150.501  | 23.72 | 31195  | 5  | 74993.54336 | 77268.74802 | 67915.8839  | 72511.94996 | 58871.53862 | 42799.9497  | 49006.61119 | 42273.75827 | 39427.00696 | 42717.2833  | 80666.31065 | 69348.15197 | 74849.0255  | 51333.6308  | 67825.93872 |
| Q9ER38 | Tor3a    | Torsin-3A                                                     | 116.091  | 12.21 | 43814  | 3  | 13544.34441 | 12739.17379 | 13034.38203 | 13423.26062 | 12664.23097 | 19318.53168 | 17093.67472 | 9113.696768 | 18823.95021 | 18661.66511 | 13362.67806 | 13108.12118 | 14596.49543 | 15922.53616 | 14288.58804 |
| Q9ER41 | Tor1b    | Torsin-1B                                                     | 59.065   | 10.71 | 37818  | 3  | 6755.249606 | 6598.787172 | 7178.696143 | 7946.37098  | 7103.92508  | 8170.605752 | 8513.028781 | 6997.798285 | 11610.97027 | 8051.272091 | 7326.581541 | 2906.149512 | 8499.762172 | 8286.734606 | 3307.948627 |
| Q9ER72 | Cars     | Cysteine-tRNA ligase, cytoplasmic                             | 413.681  | 19.61 | 94860  | 13 | 112955.7035 | 126208.2709 | 135721.7761 | 121912.1868 | 114197.2469 | 115599.6931 | 138712.3729 | 134216.2612 | 105330.074  | 104262.0114 | 125289.1055 | 138644.2343 | 130320.965  | 122690.4082 | 115601.2595 |
| Q9ER88 | Dap3     | 28S ribosomal protein S29, mitochondrial                      | 158.728  | 15.09 | 44699  | 3  | 8458.774057 | 7422.498725 | 6807.773081 | 6689.06137  | 5472.082846 | 4368.757174 | 6985.827419 | 6726.493952 | 7084.180887 | 5543.623294 | 5821.669987 | 7937.1579   | 3075.023495 | 5125.17058  | 5503.757657 |
| Q9ERD8 | Parvg    | Gamma-parvin                                                  | 69.736   | 17.22 | 37603  | 3  | 7429.898564 | 5866.702793 | 8177.644596 | 8245.77138  | 7387.134072 | 4727.436797 | 4956.583716 | 8431.341891 | 7211.913584 | 7690.170948 | 8147.680047 | 9095.29407  | 8679.427743 | 7732.427619 | 7595.018116 |
| Q9ERK4 | Cse11    | Exportin-2                                                    | 1083.246 | 42.22 | 110455 | 27 | 331266.1741 | 338343.4542 | 332614.6983 | 339120.2019 | 300358.8075 | 256260.451  | 316737.0887 | 342834.8728 | 319075.739  | 246367.7928 | 303023.6154 | 347782.0343 | 345336.3864 | 314453.5806 | 288894.3644 |
| Q9ERL7 | Gmf1     | Glia maturation factor gamma                                  | 94.209   | 30.28 | 16748  | 4  | 89190.80789 | 90764.18134 | 92031.17065 | 89812.80135 | 92360.33547 | 62325.77061 | 75566.38845 | 60387.14646 | 69690.3358  | 75794.6874  | 92221.44578 | 83309.53683 | 85202.44602 | 83972.17277 | 63232.65318 |
| Q9ERN0 | Scamp2   | Secretory carrier-associated membrane protein 2               | 138.647  | 9.73  | 36465  | 2  | 45216.41    | 43337.51974 | 41166.91111 | 44002.15737 | 46007.9527  | 47335.29845 | 39986.162   | 41507.58533 | 42942.69557 | 44511.51248 | 46174.66376 | 41867.02747 | 42772.76395 | 44062.80731 | 46552.41865 |
| Q9ERS2 | Ndufa13  | NADH dehydrogenase [ubiquinone] 1 alpha subcomplex subunit 13 | 74.502   | 22.92 | 16860  | 3  | 22856.24958 | 25886.89953 | 24634.33804 | 22753.73282 | 21909.72954 | 22014.60852 | 21313.08503 | 23191.23584 | 25552.30931 | 25045.11161 | 25102.80944 | 24961.72163 | 24374.54837 | 23324.77796 | 22840.58748 |
| Q9ERS5 | Plekha2  | Pleckstrin homology domain-containing family A member 2       | 61.286   | 8.71  | 47380  | 3  | 22137.80258 | 16435.26382 | 18090.21553 | 16679.2913  | 25949.79209 | 20212.42038 | 17170.53934 | 23108.94007 | 24484.69224 | 21622.34139 | 22053.85964 | 23396.45201 | 20168.0989  | 23747.58981 | 21977.43786 |
| Q9ERU9 | Ranbp2   | E3 SUMO-protein ligase RanBP2                                 | 381.301  | 5.6   | 341121 | 11 | 42171.82273 | 35116.02439 | 38467.89192 | 37732.862   | 32382.56888 | 29737.74286 | 40943.86952 | 34160.15976 | 40191.3416  | 30669.28746 | 32290.02946 | 44243.91141 | 34270.63841 | 35663.76449 | 40522.50594 |
| Q9ES52 | Inpp5d   | Phosphatidylinositol 3,4,5-trisphosphate 5-phosphatase 1      | 932.081  | 33.59 | 133542 | 29 | 297443.5635 | 293256.2107 | 281663.813  | 289638.0258 | 294955.0832 | 266663.5709 | 280236.3576 | 260818.7842 | 285778.6372 | 274969.1379 | 281647.8478 | 307796.7042 | 298778.0013 | 316982.5651 | 297671.7301 |
| Q9ESL4 | Map3k20  | Mitogen-activated protein kinase kinase kinase 20             | 250.059  | 14.84 | 91720  | 9  | 40954.07831 | 51817.28294 | 43699.036   | 45915.66687 | 39805.87209 | 41650.19689 | 48322.27728 | 53644.33298 | 75605.16577 | 44739.10785 | 40073.76285 | 43048.69695 | 38653.30894 | 70899.97476 | 50615.33892 |
| Q9EST5 | Anp32b   | Acidic leucine-rich nuclear phosphoprotein 32 family member B | 188.821  | 27.57 | 31079  | 7  | 435539.647  | 364419.7222 | 457289.4119 | 432698.6951 | 423061.3819 | 326716.2285 | 420580.5443 | 352709.7965 | 372726.726  | 390191.1523 | 382436.2535 | 390436.4369 | 360165.7065 | 424602.7075 | 416448.6024 |
| Q9ESU6 | Brd4     | Bromodomain-containing protein 4                              | 39.623   | 2.36  | 155895 | 3  | 11625.33575 | 14784.66733 | 18651.80231 | 12868.79977 | 13171.01801 | 10157.84738 | 12441.85326 | 8813.3973   | 11169.14576 | 9119.605228 | 14227.22173 | 13165.16657 | 8706.059441 | 11229.9943  | 15915.69017 |
| Q9ESV0 | Ddx24    | ATP-dependent RNA helicase DDX24                              | 61.412   | 4.08  | 96429  | 2  | 5352.615215 | 4436.050662 | 5672.826246 | 4586.238505 | 4320.294256 | 4925.470482 | 5893.02142  | 5611.220986 | 4199.752157 | 4996.059914 | 4262.855982 | 4119.694259 | 4534.472416 | 3934.980027 | 4915.295057 |
| Q9ESW0 | Ddb1     | DNA damage-binding protein 1                                  | 311.36   | 11.75 | 126862 | 11 | 174594.6305 | 191701.5134 | 177126.9962 | 188426.2579 | 186982.7307 | 168574.7107 | 191866.1327 | 187938.7952 | 188749.9588 | 170747.7597 | 174694.5319 | 181656.5034 | 169129.768  | 191358.0816 | 182001.118  |
| Q9ESW4 | Agk      | Acylglycerol kinase, mitochondrial                            | 97.478   | 11.88 | 46976  | 2  | 19158.91699 | 17068.70121 | 16613.35269 | 18842.92661 | 5913.666191 | 3062.909654 | 7880.199614 | 14729.2303  | 13966.72775 | 6585.706072 | 0.008046421 | 16981.15966 | 18288.97456 | 14598.12143 | 15001.149   |
| Q9ESX5 | Dkc1     | H/ACA ribonucleoprotein complex subunit DKC1                  | 330.471  | 24.95 | 57402  | 8  | 83180.927   | 96142.7907  | 84650.01017 | 83292.90786 | 86299.01417 | 67901.50304 | 86170.76406 | 71692.49694 | 84236.65528 | 79120.51163 | 75415.52215 | 87956.33059 | 87009.59376 | 81744.80762 | 83908.96257 |
| Q9ESY9 | Ifi30    | Gamma-interferon-inducible lysosomal thiol reductase          | 195.149  | 20.97 | 27784  | 6  | 57069.81062 | 56635.61183 | 52554.76624 | 59401.0686  | 51208.97166 | 20314.94959 | 26142.32165 | 21668.51494 | 20710.46899 | 23279.28273 | 32245.56092 | 39293.1005  | 35525.96269 | 40123.24493 | 40433.51255 |
| Q9ESZ8 | Gtf2i    | General transcription factor II-I                             | 186.548  | 14.43 | 112265 | 8  | 43692.66236 | 39294.1305  | 44433.71992 | 43303.08082 | 32009.53874 | 36574.78911 | 37585.30066 | 38157.32057 | 34674.36923 | 38123.71362 | 38100.01605 | 42263.78993 | 33669.9189  | 31463.06458 | 36749.46754 |
| Q9ET01 | Pygl     | Glycogen phosphorylase, liver form                            | 203.488  | 11.76 | 97463  | 7  | 72803.52014 | 69524.06298 | 56791.8006  | 63253.61079 | 67253.89244 | 56547.33006 | 52484.19464 | 62915.44983 | 60527.57602 | 65875.95008 | 67057.17776 | 67028.55004 | 70612.54766 | 74851.6136  | 67884.2316  |
| Q9ET22 | Dpp7     | Dipeptidyl peptidase 2                                        | 42.274   | 7.71  | 56254  | 2  | 5386.850672 | 6900.424521 | 3164.54448  | 5620.799204 | 3938.23956  | 2868.050388 | 2379.674073 | 4795.374382 | 2982.872204 | 3751.549057 | 5684.753095 | 6150.483757 | 6520.24074  | 4476.350411 | 6001.387272 |
| Q9ET30 | Tm9sf3   | Transmembrane 9 superfamily member 3                          | 118.637  | 11.07 | 67545  | 5  | 61463.15081 | 72640.24712 | 58288.7044  | 65394.92592 | 57597.36473 | 71563.29337 | 66364.76244 | 65351.98519 | 70963.45353 | 72308.04189 | 60951.73062 | 56523.73499 | 60609.21448 | 61540.84633 | 62258.05397 |
| Q9JHF7 | Hpgds    | Hematopoietic prostaglandin D synthase                        | 113.844  | 22.11 | 23227  | 3  | 21300.33491 | 18833.48733 | 19053.44416 |             |             |             |             |             |             |             |             |             |             |             |             |

|        |         |                                                                    |          |       |        |    |             |             |             |             |             |             |             |              |             |             |             |             |             |             |              |
|--------|---------|--------------------------------------------------------------------|----------|-------|--------|----|-------------|-------------|-------------|-------------|-------------|-------------|-------------|--------------|-------------|-------------|-------------|-------------|-------------|-------------|--------------|
| Q9JHW4 | Eefsec  | Selenocysteine-specific elongation factor                          | 64.403   | 8.06  | 63539  | 2  | 3667.691289 | 4153.789622 | 1042.572537 | 3257.748521 | 2618.496239 | 1854.469266 | 3554.067552 | 4119.257951  | 3250.082953 | 3186.004291 | 3607.882352 | 3165.476682 | 2654.46072  | 2371.35711  | 3284.332368  |
| Q9J10  | Stk3    | Serine/threonine-protein kinase 3                                  | 163.787  | 16.1  | 56855  | 7  | 49409.94896 | 52822.8082  | 51585.43937 | 57668.50038 | 53522.26734 | 57773.58403 | 55659.91964 | 64174.60242  | 57130.61575 | 55879.1831  | 59360.27732 | 56320.92707 | 56713.54713 | 54020.6497  | 52448.99798  |
| Q9J11  | Stk4    | Serine/threonine-protein kinase 4                                  | 145.787  | 17.45 | 55541  | 7  | 69056.54779 | 69363.37677 | 65069.84169 | 73245.0513  | 66749.98501 | 70384.58091 | 64119.45792 | 75570.21424  | 65065.90884 | 69153.24886 | 73388.16204 | 65252.55882 | 70171.28611 | 79613.49998 | 66622.34322  |
| Q9J75  | Nqo2    | Ribosylidihyronicotinamide dehydrogenase [quinone]                 | 90.129   | 22.08 | 26248  | 3  | 0.008226335 | 0.007562416 | 6165.689606 | 6425.011539 | 500.4094793 | 4811.230097 | 4697.702957 | 4972.067892  | 4337.794279 | 7384.048944 | 14116.42553 | 4831.44262  | 12095.70629 | 6668.021466 | 6709.912855  |
| Q9JIF7 | Copb1   | Coatomer subunit beta                                              | 993.059  | 34.63 | 107066 | 24 | 174936.3361 | 210407.92   | 192515.4882 | 220996.8089 | 177319.8093 | 175942.6814 | 194129.5216 | 191454.9881  | 202802.3577 | 192729.3582 | 200669.9878 | 201982.0734 | 209831.1286 | 172368.7304 | 181864.3605  |
| Q9JIG7 | Cdc22   | Coiled-coil domain-containing protein 22                           | 144.224  | 15.15 | 70844  | 6  | 23914.57996 | 22741.42993 | 21830.50292 | 23684.91395 | 22343.59415 | 13352.90287 | 25208.03919 | 25791.19803  | 22879.51548 | 20012.37036 | 22148.31658 | 20234.53878 | 21954.50984 | 24519.61011 | 24849.33499  |
| Q9J1I5 | Dazap1  | DAZ-associated protein 1                                           | 130.901  | 15.27 | 43214  | 4  | 25111.60635 | 29185.15449 | 26707.39543 | 27967.5786  | 21730.51126 | 27005.34379 | 27162.60815 | 26693.97804  | 23369.78682 | 23751.62488 | 28528.12856 | 29822.2553  | 25922.38559 | 25950.07533 | 24760.26908  |
| Q9J1I6 | Akr1a1  | Alcohol dehydrogenase [NADP(+)]                                    | 477.043  | 65.85 | 36587  | 17 | 361531.6186 | 337829.5124 | 312500.9566 | 350020.1686 | 346631.0511 | 299708.1148 | 327939.5997 | 298495.2826  | 302492.1363 | 291572.7242 | 359933.4076 | 334611.9101 | 332551.9279 | 325210.8666 | 328010.967   |
| Q9JIK5 | Ddx21   | Nucleolar RNA helicase 2                                           | 222.972  | 12.69 | 93551  | 7  | 61109.28266 | 56614.16482 | 50670.66139 | 67505.71962 | 57781.36275 | 61052.23246 | 75313.04098 | 74660.90765  | 72934.79164 | 65085.93645 | 67546.96005 | 52510.04572 | 58476.4495  | 56119.36607 | 49915.54976  |
| Q9JIK9 | Mrps34  | 28S ribosomal protein S34, mitochondrial                           | 30.133   | 10.55 | 25827  | 3  | 19680.56331 | 19382.67185 | 22423.78863 | 22906.8421  | 20331.80187 | 23554.28423 | 22458.80887 | 22894.69784  | 25628.90288 | 24585.83156 | 19088.23858 | 20727.45204 | 20635.38324 | 21201.79425 | 21871.51296  |
| Q9JIX8 | Acin1   | Apoptotic chromatin condensation inducer in the nucleus            | 139.162  | 4.19  | 150719 | 5  | 27774.60066 | 32323.18267 | 39848.13757 | 39456.3256  | 34946.62159 | 26987.69429 | 34747.51327 | 30813.98106  | 27270.95964 | 30392.02444 | 37485.34593 | 34630.55407 | 30348.15108 | 35247.83448 | 32598.87483  |
| Q9JIY5 | Htra2   | Serine protease HTRA2, mitochondrial                               | 152.61   | 10.7  | 49348  | 4  | 31558.35707 | 29811.67039 | 20969.42031 | 29332.55752 | 26435.61381 | 28775.31719 | 33548.47026 | 24204.64847  | 32258.1631  | 31426.6966  | 18851.51288 | 23694.75635 | 34615.06938 | 32682.24444 | 29051.42414  |
| Q9J2I8 | Fli1    | Protein flightless-1 homolog                                       | 992.811  | 29.5  | 144803 | 26 | 196079.6467 | 199870.3592 | 174378.7062 | 197125.0681 | 153355.3319 | 159148.7187 | 180744.4548 | 186870.712   | 177964.9318 | 175879.0686 | 166312.8328 | 174672.9263 | 158331.75   | 180575.4337 | 170908.4582  |
| Q9JJA4 | Wdr12   | Ribosome biogenesis protein WDR12                                  | 33.697   | 8.04  | 47347  | 2  | 4055.733203 | 5227.738712 | 5899.246683 | 4827.798497 | 7901.136674 | 7105.441856 | 6678.111903 | 10072.43005  | 8791.195637 | 3556.335457 | 4914.339476 | 4995.620663 | 6165.153797 | 7393.053775 | 5082.519641  |
| Q9JKJ2 | Lanc12  | LanC-like protein 2                                                | 141.872  | 18.44 | 50777  | 5  | 21679.40444 | 17073.84743 | 16633.09052 | 16566.98655 | 15187.81217 | 12107.28821 | 19753.98213 | 18591.26816  | 21513.6049  | 16212.62554 | 17768.702   | 21712.33661 | 23123.78893 | 20741.11212 | 19272.8485   |
| Q9JUJ8 | Sh3bgr1 | SH3 domain-binding glutamic acid-rich-like protein                 | 216.988  | 70.18 | 12811  | 6  | 113699.3313 | 109711.1484 | 95537.68643 | 93171.5438  | 95131.66306 | 82456.52563 | 84742.32345 | 83181.99444  | 66018.96786 | 75597.18899 | 83456.64043 | 91840.34851 | 96079.43753 | 82149.36875 | 92021.444853 |
| Q9JZJ4 | Ube2j1  | Ubiquitin-conjugating enzyme E2 J1                                 | 38.103   | 6.92  | 34990  | 2  | 8976.457833 | 9181.522289 | 11141.26297 | 10220.63213 | 9432.207797 | 15221.25619 | 15199.39564 | 15515.86306  | 16475.72371 | 15182.7653  | 10106.7019  | 8348.454288 | 11882.69422 | 12972.84261 | 11413.98295  |
| Q9JK23 | Psmg1   | Proteasome assembly chaperone 1                                    | 110.485  | 12.8  | 33104  | 3  | 22412.38943 | 22414.85457 | 22919.61908 | 21303.42825 | 21716.24025 | 22417.69902 | 23564.98364 | 24317.76502  | 24171.82465 | 22920.02564 | 26476.10818 | 21451.47231 | 25137.54913 | 23969.94382 | 23933.2799   |
| Q9JK81 | Myg1    | UPF0160 protein MYG1, mitochondrial                                | 343.682  | 30.53 | 42723  | 8  | 89074.84124 | 96717.60992 | 85283.23753 | 90289.69874 | 87285.81721 | 73399.88086 | 76043.49644 | 74149.02866  | 66064.6914  | 73129.17147 | 88945.32941 | 83498.85863 | 84859.04037 | 84959.56592 | 82379.51643  |
| Q9JKF1 | Iqgap1  | Ras GTPase-activating-like protein IQGAP1                          | 3899.36  | 65.42 | 188742 | 92 | 2961205.639 | 3027587.362 | 2763973.072 | 2808023.782 | 2632196.263 | 2787018.778 | 3089547.728 | 3020743.126  | 3081746.233 | 2942142.864 | 3117751.981 | 3103882.464 | 3126958.822 | 3165606.072 | 3133180.303  |
| Q9JKP5 | Mbnl1   | Muscleblind-like protein 1                                         | 28.027   | 6.45  | 36976  | 2  | 58187.8971  | 54004.03485 | 49679.72324 | 49618.44953 | 48126.10385 | 40890.56144 | 45078.56776 | 35025.76598  | 36354.86324 | 37364.76933 | 49519.79024 | 44657.32546 | 47642.68786 | 46784.24728 | 45826.14826  |
| Q9JKR6 | Hyou1   | Hypoxia up-regulated protein 1                                     | 1066.388 | 39.14 | 111181 | 29 | 447097.2533 | 472642.6099 | 412562.7105 | 444746.9206 | 394031.2224 | 614597.2779 | 557270.0026 | 560681.3872  | 604805.7164 | 520967.8682 | 487379.1228 | 481126.4265 | 470362.2661 | 469901.2598 | 443340.5556  |
| Q9JKV1 | Adrm1   | Proteasomal ubiquitin receptor ADRM1                               | 72.636   | 10.81 | 42060  | 3  | 35201.91204 | 31209.7096  | 38147.63357 | 42132.24729 | 23640.19744 | 30655.43321 | 34367.42106 | 32211.27169  | 32669.43326 | 25107.91296 | 25819.44782 | 32138.0804  | 34140.5122  | 34648.56733 | 23583.47338  |
| Q9JL26 | Fmn1    | Formin-like protein 1                                              | 999.021  | 31.9  | 122060 | 29 | 438853.0833 | 437525.9881 | 422320.7988 | 467524.7872 | 452210.0738 | 401627.7178 | 404440.002  | 389448.8545  | 388764.0629 | 417268.5614 | 434558.7471 | 408427.2161 | 409279.4265 | 445006.0084 | 428129.2676  |
| Q9JL35 | Hmgm5   | High mobility group nucleosome-binding domain-containing protein 5 | 59.391   | 5.67  | 45344  | 2  | 4005.673361 | 245.3484736 | 1733.518443 | 5108.582702 | 10926.01899 | 8457.736766 | 3940.301643 | 7847.523718  | 3689.885369 | 1443.154738 | 13753.73814 | 400.9657923 | 7514.141334 | 4269.450759 | 11041.33689  |
| Q9JLB0 | Mpp6    | MAGUK p55 subfamily member 6                                       | 112.07   | 9.04  | 62631  | 4  | 49786.9907  | 50667.30798 | 48833.95873 | 57781.07109 | 54571.84958 | 46903.84808 | 48017.94914 | 48065.03674  | 50643.96064 | 50903.17753 | 56663.17739 | 50647.20087 | 53094.43907 | 53669.3656  | 50273.84405  |
| Q9JLI6 | Scly    | Selenocysteine lyase                                               | 111.144  | 11.11 | 47174  | 3  | 28892.1442  | 26316.54305 | 32939.81732 | 26503.7329  | 27196.20715 | 25686.52037 | 21326.41212 | 37171.714033 | 27643.88015 | 20667.1358  | 29410.67006 | 24779.38063 | 25854.96279 | 23691.10946 | 24458.14638  |
| Q9JLI8 | Sart3   | Squamous cell carcinoma antigen recognized by T-cells 3            | 85.073   | 3.33  | 109619 | 2  | 6305.941566 | 7520.191901 | 1136.708927 | 7404.859681 | 6644.800598 | 6441.661134 | 5486.965111 | 6527.555397  | 5373.587158 | 6355.745899 | 7289.639377 | 6351.499485 | 5988.129359 | 6753.734295 | 6843.143255  |
| Q9JLJ2 | Aldh9a1 | 4-trimethylaminobutyraldehyde dehydrogenase                        | 687.374  | 69.64 | 53515  | 21 | 375545.0163 | 379463.5148 | 376394.0598 | 370053.1239 | 365879.0956 | 348239.1155 | 352816.6627 | 338898.0067  | 353191.0311 | 306403.0207 | 353907.8292 | 362469.595  | 350675.5833 | 365334.0021 | 358072.0888  |
| Q9JLQ0 | Cd2ap   | CD2-associated protein                                             | 115.993  | 12.87 | 70450  | 6  | 34345.84463 | 33689.45785 | 23821.49211 | 39097.02927 | 23564.05648 | 28692.32765 | 31709.20517 | 19641.14984  | 21796.80475 | 23095.83046 | 22207.64284 | 26803.51312 | 23572.23256 | 20095.1141  | 28572.80657  |
| Q9JLQ2 | Glt2    | ARF GTPase-activating protein GIT2                                 | 146.227  | 15.82 | 78766  | 6  | 20883.39544 | 22547.99468 | 11279.09971 | 19503.89722 | 20959.65378 | 13213.25719 | 15016.67372 | 10654.36919  | 16091.97498 | 20781.95581 | 25632.42888 | 19830.39021 | 18327.9462  | 11427.52542 | 13888.23952  |
| Q9JLV6 | Pnkp    | Bifunctional polynucleotide phosphatase/kinase                     | 136.344  | 20.31 | 57223  | 4  | 17166.04407 | 14138.64514 | 11791.88159 | 13983.9498  | 11832.01086 | 8803.04886  | 12111.59795 | 9288.21012   | 12152.01449 | 8340.842099 | 12795.85901 | 12125.83941 | 10639.23951 | 2152.474905 | 8734.900941  |
| Q9JM14 | Nt5c    | 5'(3')-deoxynucleotidase, cytosolic type                           | 114.573  | 27.5  | 23076  | 3  | 17106.82782 | 15518.21031 | 12824.4506  | 14354.32023 | 14378.53705 | 9837.651915 | 12037.0533  | 11408.12169  | 12804.1579  | 11084.39187 | 13685.98024 | 13465.21781 | 12350.32196 | 11723.39301 | 11013.20189  |
| Q9JM76 | Arpc3   | Actin-related protein 2/3 complex subunit 3                        | 357.381  | 69.1  | 20525  | 13 | 410221.9812 | 412733.304  | 404344.7343 | 402993.4537 | 382225.3606 | 327790.2834 | 353030.9828 | 316105.9915  | 359071.1696 | 335325.0093 | 421885.2158 | 433102.6862 | 471331.1017 | 420452.8874 | 392389.7257  |
| Q9JM90 | Stap1   | Signal-transducing adaptor protein 1                               | 483.469  | 61.28 | 34628  | 14 | 247220.7662 | 251380.5135 | 199260.9868 | 219211.6352 | 189881.4186 | 268852.5667 | 291281.9442 | 354426.3449  | 352945.5691 | 255132.0229 | 238888.1535 | 268204.6178 | 233242.9957 | 222549.5152 | 220879.5346  |
| Q9JMA1 | Usp14   | Ubiquitin carboxyl-terminal hydrolase 14                           | 521.642  | 42.19 | 56002  | 15 | 130956.2661 | 137082.4499 | 120723.2859 | 136934.7572 | 142035.4695 | 140207.0386 | 138882.041  | 151911.7047  | 143468.0464 | 129590.0738 | 137478.8859 | 145688.4039 | 124157.3044 | 122887.6486 | 134961.6458  |
| Q9JMD0 | Znf207  | BUB3-interacting and GLEBS motif-containing protein ZNF207         | 61.803   | 5.05  | 52793  | 2  | 10757.63116 | 9145.103586 | 0.009509917 | 8741.47696  | 11635.88682 | 11638.12887 | 8800.164021 | 8271.968143  | 9087.723462 | 9501.309303 | 9079.997712 | 12748.73423 | 10897.86444 | 0.00945634  | 9568.13486   |
| Q9JMH6 | Txnrd1  | Thioredoxin reductase 1, cytoplasmic                               | 304.448  | 20.23 | 67084  | 7  | 40906.31621 | 40884.56324 | 32759.05756 | 32467.54339 | 30314.44045 | 42827.02281 | 49608.21033 | 45125.10002  | 51583.10262 | 41486.56796 | 32997.90127 | 39574.95025 | 34947.93003 | 41278.29828 | 36211.28793  |
| Q9JMH9 | Myo18a  | Unconventional myosin-XVIIIa                                       | 392.202  | 9.22  | 232755 | 11 | 44995.70565 | 42401.88633 | 35262.05595 | 50531.73554 | 42495.60325 | 36007.18078 | 34942.96183 | 38465.64636  | 39597.24074 | 41831.69401 | 40476.39369 | 39962.55139 | 36255.10611 | 45702.81556 | 43845.91521  |
| Q9QUJ7 | Acs4    | Long-chain-fatty-acid-CoA ligase                                   |          |       |        |    |             |             |             |             |             |             |             |              |             |             |             |             |             |             |              |

|        |          |                                                                            |          |       |        |     |             |             |             |             |             |             |             |             |             |             |             |             |             |             |             |
|--------|----------|----------------------------------------------------------------------------|----------|-------|--------|-----|-------------|-------------|-------------|-------------|-------------|-------------|-------------|-------------|-------------|-------------|-------------|-------------|-------------|-------------|-------------|
| Q9QXG4 | Acss2    | Acetyl-coenzyme A synthetase, cytoplasmic                                  | 116.082  | 7.42  | 78862  | 3   | 15682.11703 | 17344.55167 | 14667.98258 | 13599.34122 | 13164.46525 | 11339.66503 | 14687.59615 | 15717.00871 | 13824.76305 | 10815.88687 | 5609.334998 | 8957.332565 | 10990.20254 | 8141.504142 | 13500.27041 |
| Q9QXK3 | Copg2    | Coatomer subunit gamma-2                                                   | 433.918  | 19.63 | 97681  | 12  | 130047.5933 | 140072.9921 | 125815.3617 | 141278.8064 | 128934.1162 | 130818.9082 | 167900.1401 | 141382.6086 | 147967.1868 | 124757.9895 | 129451.5914 | 130973.8075 | 133809.3875 | 135091.4331 | 136357.8673 |
| Q9QXK7 | Cpsf3    | Cleavage and polyadenylation specificity factor subunit 3                  | 97.847   | 13.01 | 77505  | 5   | 27076.94573 | 23840.85014 | 19091.76081 | 21959.09796 | 19969.30263 | 20143.1764  | 22626.03808 | 21787.51063 | 25972.9018  | 23638.18518 | 21160.58623 | 22129.13351 | 17318.41329 | 22750.28641 | 23622.23429 |
| Q9QXS1 | Plec     | Plectin                                                                    | 5678.135 | 44    | 534188 | 171 | 3204091.02  | 3104901.628 | 2971521.163 | 2964316.996 | 2970063.578 | 2841388.787 | 2957741.696 | 2962009.824 | 3023665.162 | 2980586.416 | 3129732.522 | 2974072.647 | 3088665.731 | 3240870.062 | 3055979.782 |
| Q9QXT0 | Cnpy2    | Protein canopy homolog 2                                                   | 95.44    | 14.29 | 20767  | 2   | 19595.50917 | 7337.681506 | 19323.20486 | 21397.62465 | 18289.5499  | 7454.229835 | 16475.7509  | 16816.38485 | 10434.86855 | 11273.25547 | 8012.497159 | 12033.63866 | 18333.63866 | 16014.29457 | 6521.479514 |
| Q9QXW9 | Slc7a8   | Large neutral amino acids transporter small subunit 2                      | 148.128  | 14.88 | 57873  | 6   | 56115.60508 | 58669.1265  | 48472.17769 | 49983.92259 | 48191.98274 | 46826.19101 | 48736.06847 | 44417.98229 | 48343.29284 | 50403.90695 | 53656.5236  | 48113.93149 | 60119.24329 | 52534.24078 | 54714.15803 |
| Q9QXX4 | Slc25a13 | Calcium-binding mitochondrial carrier protein Aralar2                      | 855.463  | 64.64 | 74467  | 27  | 477578.491  | 482304.7455 | 496813.8462 | 499673.6508 | 488879.9369 | 502307.2793 | 474889.9731 | 467923.7827 | 491030.8171 | 482822.3162 | 461160.6329 | 455090.7884 | 474658.6044 | 493846.6408 | 470510.2924 |
| Q9QXZ0 | Macf1    | Microtubule-actin cross-linking factor 1                                   | 698.777  | 4.58  | 831878 | 24  | 57608.80422 | 54728.13993 | 42435.57689 | 48790.76659 | 53412.76124 | 39596.75192 | 51507.41799 | 40609.55099 | 57613.79414 | 58792.97399 | 55356.50301 | 46206.54352 | 56405.0413  | 57624.8768  | 50304.31921 |
| Q9QY06 | Myo9b    | Unconventional myosin-IXb                                                  | 209.275  | 4.4   | 238834 | 6   | 21777.65362 | 16333.16364 | 11261.51469 | 17903.8996  | 17644.38721 | 11997.18835 | 21335.79542 | 17101.66622 | 20078.98515 | 18927.04986 | 19977.66782 | 20710.12796 | 20969.52185 | 23004.31916 | 19401.30213 |
| Q9QY17 | Pacsin2  | Protein kinase C and casein kinase substrate in neurons 2 protein          | 45.468   | 4.1   | 55978  | 2   | 22853.19349 | 17490.00528 | 21009.77802 | 18734.82452 | 21303.11469 | 17345.93709 | 18664.96557 | 8304.9161   | 8906.397922 | 8985.514236 | 21455.46744 | 18424.71227 | 18706.06404 | 19891.19523 | 21007.94115 |
| Q9QY76 | Vapb     | Vesicle-associated membrane protein-associated protein B                   | 278.886  | 37.86 | 26946  | 8   | 119339.1094 | 113438.5194 | 108877.4664 | 100931.343  | 103975.537  | 91673.18817 | 113038.1418 | 105031.0147 | 103272.2853 | 104492.2642 | 110331.3562 | 108652.6192 | 102583.5407 | 150322.5512 | 106031.0836 |
| Q9QYB1 | Clic4    | Chloride intracellular channel protein 4                                   | 894.001  | 77.08 | 28729  | 20  | 536635.7143 | 552719.3661 | 509766.9624 | 528163.831  | 534202.6664 | 507396.2673 | 485914.1474 | 548282.2012 | 525107.2248 | 501996.6187 | 561493.0318 | 566526.4916 | 575114.4134 | 552917.4439 | 511704.8838 |
| Q9QYF1 | Rdh11    | Retinol dehydrogenase 11                                                   | 165.498  | 15.19 | 35148  | 4   | 67859.60088 | 69628.18231 | 76878.81944 | 62066.17297 | 74371.03256 | 78232.63393 | 81583.1454  | 75073.65885 | 86115.12049 | 66538.76258 | 77009.17213 | 67449.43624 | 69265.72539 | 68814.44526 | 75073.82719 |
| Q9QYI3 | Dnajc7   | DnaJ homolog subfamily C member 7                                          | 41.484   | 4.86  | 56476  | 2   | 6505.687805 | 7231.690923 | 7956.973523 | 9859.757225 | 7450.636037 | 7165.083677 | 7877.164976 | 8209.105426 | 7948.154348 | 6400.247378 | 6813.480352 | 8185.863513 | 7041.799756 | 7842.978139 | 8029.887539 |
| Q9QYJ0 | Dnaja2   | DnaJ homolog subfamily A member 2                                          | 275.12   | 37.86 | 45746  | 9   | 46050.72904 | 55714.57766 | 83814.53539 | 79398.79306 | 45445.63871 | 46182.78671 | 95159.53324 | 98471.16789 | 90879.07431 | 58576.66081 | 42792.73295 | 78818.5262  | 36419.59251 | 35852.47993 | 39066.20175 |
| Q9QYJ3 | Dnajb1   | DnaJ homolog subfamily B member 1                                          | 54.184   | 9.41  | 38167  | 3   | 22173.14703 | 18066.14225 | 20617.803   | 15218.79878 | 23677.90009 | 20175.02583 | 20904.57744 | 19941.1091  | 21751.40293 | 18919.91024 | 21775.69688 | 21654.38438 | 19844.53718 | 21130.40125 | 22545.28711 |
| Q9QYL8 | Lyp1a2   | Acyl-protein thioesterase 2                                                | 65.824   | 31.17 | 24807  | 3   | 35067.33742 | 25482.8113  | 26120.49563 | 26073.13583 | 20643.67686 | 18785.15732 | 12993.54912 | 12938.31866 | 12651.41634 | 11530.96865 | 26080.9223  | 18624.6819  | 17652.31151 | 3857.338751 | 16937.69736 |
| Q9QYR9 | Acot2    | Acyl-coenzyme A thioesterase 2, mitochondrial                              | 162.512  | 13.25 | 49657  | 4   | 39719.66733 | 39950.18141 | 32971.5638  | 34829.34791 | 32206.55962 | 32001.95313 | 26260.03039 | 26193.08143 | 31462.59895 | 33076.49499 | 33151.05282 | 28333.83342 | 34214.81046 | 33412.22657 | 30212.97718 |
| Q9QZ08 | Nagk     | N-acetyl-D-glucosamine kinase                                              | 284.72   | 37.32 | 37268  | 9   | 113205.307  | 94353.51558 | 105634.1471 | 120382.0616 | 93172.65449 | 75165.63045 | 105334.2005 | 83163.30206 | 99287.33534 | 101377.0921 | 99650.85903 | 89987.24463 | 92798.51046 | 112088.4047 | 100377.3939 |
| Q9QZ88 | Vps29    | Vacuolar protein sorting-associated protein 29                             | 189.181  | 40.66 | 20496  | 6   | 69708.65762 | 77560.80852 | 74033.8991  | 74835.09598 | 71382.25502 | 56520.4496  | 63415.05774 | 59277.28612 | 62573.22092 | 62793.93189 | 73885.5435  | 72088.62652 | 66936.18407 | 63233.34199 | 62100.45131 |
| Q9QZB7 | Actr10   | Actin-related protein 10                                                   | 143.584  | 15.59 | 46208  | 5   | 15298.2279  | 12148.59544 | 18653.29655 | 16239.60108 | 17531.33299 | 13958.11381 | 17177.40663 | 14339.60509 | 15562.08221 | 14507.64494 | 13377.43822 | 18099.99046 | 16799.68555 | 15573.45775 | 14927.99798 |
| Q9QZD8 | Slc25a10 | Mitochondrial dicarboxylate carrier                                        | 192.678  | 28.22 | 31715  | 4   | 36743.42034 | 36926.30789 | 32178.15614 | 32503.36343 | 38215.26045 | 39804.18397 | 32416.23867 | 31637.04989 | 37480.22229 | 35210.84848 | 45956.83508 | 26790.99612 | 32770.42665 | 43424.43819 | 44181.50983 |
| Q9QZD9 | Eif3i    | Eukaryotic translation initiation factor 3 subunit i                       | 303.528  | 40.62 | 36461  | 10  | 79138.37419 | 100582.8362 | 102263.1096 | 109151.5958 | 95687.33542 | 96883.56891 | 106457.0966 | 137974.0489 | 99893.69781 | 96685.60234 | 88093.14102 | 92199.84528 | 88998.72687 | 91168.15406 | 95850.95898 |
| Q9QE5E | Copg1    | Coatomer subunit gamma-1                                                   | 519.389  | 27.92 | 97513  | 16  | 191334.9762 | 208751.9475 | 196101.64   | 201000.0245 | 193036.3482 | 196495.822  | 242135.2395 | 209408.0096 | 226533.1146 | 193136.13   | 203531.5525 | 202992.9611 | 203371.4131 | 208819.2316 | 207689.7917 |
| Q9QE7F | Tsnax    | Translin-associated protein X                                              | 164.886  | 34.83 | 32926  | 7   | 29881.12246 | 30132.61364 | 35083.46921 | 32391.62041 | 28718.62959 | 26689.27399 | 32385.04025 | 25889.8936  | 36311.27242 | 31632.17048 | 34908.97048 | 36454.3988  | 33697.63173 | 29887.79443 | 701169.3869 |
| Q9QZL0 | Ripk3    | Receptor-interacting serine/threonine-protein kinase 3                     | 225.918  | 25.72 | 53322  | 8   | 43545.43564 | 55541.35296 | 62719.16098 | 52696.85427 | 51739.68526 | 57852.50606 | 64749.53264 | 67197.89201 | 49881.87352 | 52772.86556 | 48315.00367 | 45844.78246 | 49256.72388 | 52851.5057  | 50313.70057 |
| Q9QZM0 | Ubqln2   | Ubiquilin-2                                                                | 60.757   | 5.17  | 67351  | 2   | 2313.757338 | 2402.154537 | 2663.195897 | 0.009171104 | 0.008265859 | 0.014539799 | 0.012348474 | 0.013886636 | 0.012083387 | 0.013320187 | 0.008046421 | 0.009057159 | 0.00981159  | 0.00945634  | 0.010360417 |
| Q9QZN4 | Fbxo6    | F-box only protein 6                                                       | 44.32    | 11.86 | 34493  | 2   | 2935.286505 | 1167.970678 | 2167.634098 | 2367.663978 | 1347.321823 | 1598.306062 | 2300.476331 | 2599.297794 | 1995.91971  | 1954.629003 | 2374.86994  | 1774.856679 | 2119.182354 | 1655.78393  | 2142.866524 |
| Q9QZ08 | H2afy    | Core histone macro-H2A.1                                                   | 155.609  | 18.01 | 39735  | 5   | 77007.6464  | 75849.61534 | 70909.42048 | 73313.52276 | 74677.92737 | 78687.96229 | 79555.29751 | 65170.71959 | 70503.10066 | 77059.49242 | 77447.05031 | 77260.05172 | 79411.25304 | 80208.00351 | 86095.65283 |
| Q9R002 | Ifi202   | Interferon-activable protein 202                                           | 33.455   | 2.7   | 50466  | 6   | 6090.589968 | 6669.685765 | 6205.69664  | 8290.540122 | 6394.358951 | 7796.957407 | 5464.188983 | 7251.730365 | 8668.213946 | 8239.408076 | 6902.794135 | 6611.635823 | 7267.213682 | 10027.74956 | 6091.868003 |
| Q9R059 | Fhl3     | Four and a half LIM domains protein 3                                      | 68.107   | 9.69  | 31795  | 2   | 12216.36093 | 13993.85607 | 14383.99148 | 13820.16076 | 14657.33414 | 12713.14537 | 3155.66762  | 14353.0196  | 1868.080498 | 12271.29046 | 11972.47681 | 14322.8081  | 17208.18375 | 14551.64588 | 14119.99816 |
| Q9R062 | Gyg1     | Glycogenin-1                                                               | 32.38    | 17.72 | 37402  | 3   | 27806.42218 | 27913.82545 | 28250.90021 | 26661.41168 | 28830.63817 | 28521.09425 | 27247.39895 | 26058.97217 | 27371.61727 | 25396.20176 | 29867.33462 | 28702.56623 | 27405.72632 | 29563.55782 | 30169.26907 |
| Q9R0C8 | Vav3     | Guanine nucleotide exchange factor VAV3                                    | 179.81   | 17.47 | 97968  | 9   | 69293.23591 | 78222.79214 | 69229.0989  | 67508.59935 | 69649.82191 | 72095.90076 | 69131.74678 | 65474.41428 | 75815.10858 | 68822.86161 | 64458.67062 | 62212.4372  | 65271.08853 | 72746.52365 | 74499.0779  |
| Q9R0E1 | Plod3    | Multifunctional procollagen lysine hydroxylase and glycosyltransferase LH3 | 256.913  | 9.99  | 84922  | 5   | 25698.2037  | 22941.79803 | 24527.35384 | 25754.99941 | 18931.84434 | 18797.49979 | 24906.35207 | 21932.68036 | 23474.72802 | 23673.34548 | 21854.02879 | 20515.05938 | 23464.97226 | 20505.75801 | 21623.89511 |
| Q9R0E2 | Plod1    | Procollagen-lysine, 2-oxoglutarate 5-dioxygenase 1                         | 73.614   | 8.65  | 83595  | 4   | 13493.64551 | 16086.60809 | 8821.733474 | 15013.83493 | 14708.36445 | 15100.19055 | 16612.85601 | 9656.015486 | 13812.27487 | 12210.27647 | 13076.95972 | 9940.910645 | 14966.05756 | 14298.44175 | 14902.08658 |
| Q9R0N0 | Galk1    | Galactokinase                                                              | 333.628  | 33.93 | 42295  | 9   | 189188.824  | 187252.8467 | 153929.7779 | 157739.3416 | 178744.0003 | 201388.8134 | 200877.123  | 212474.9232 | 215150.5641 | 177439.5818 | 180530.4722 | 179368.3932 | 175613.6985 | 194141.9713 | 173431.6651 |
| Q9R0P3 | Esd      | S-formylglutathione hydrolase                                              | 370.137  | 64.89 | 31320  | 11  | 200833.0865 | 211877.0856 | 189485.8377 | 177121.2219 | 177750.6094 | 210007.5849 | 215872.0603 | 239967.3878 | 212246.3463 | 192745.7953 | 174555.007  | 180801.5619 | 185161.7101 | 184290.1865 | 198485.7426 |
| Q9R0P5 | Dstn     | Destrin                                                                    | 436.859  | 71.52 | 18522  | 11  | 535084.4907 | 418301.6619 | 310498.5484 | 316225.5321 | 360596.848  | 327208.8369 | 263101.7878 | 326634.9626 | 340386.3385 | 276406.8389 | 520313.8959 | 437129.5718 | 409383.9003 | 419688.2478 | 379164.4052 |
| Q9R0Q8 | Clec4e   | C-type lectin domain family 4 member E                                     | 43.575   | 12.15 | 24431  | 2   | 3453.607616 | 0.007562416 | 5299.737919 | 3763.06681  | 1932.177342 | 21983.50062 | 10088.36758 | 18583.85805 | 16542.06151 | 12638.85016 | 6374.77794  | 4170.323509 | 3513.606187 | 6290.35356  | 3124.0072   |
| Q9R0U0 | Srsf10   | Serine/arginine-rich splicing factor 10                                    | 137.952  | 14.89 | 313    |     |             |             |             |             |             |             |             |             |             |             |             |             |             |             |             |

|        |          |                                                                     |          |        |        |    |             |             |             |             |             |             |             |             |             |             |             |             |             |             |             |
|--------|----------|---------------------------------------------------------------------|----------|--------|--------|----|-------------|-------------|-------------|-------------|-------------|-------------|-------------|-------------|-------------|-------------|-------------|-------------|-------------|-------------|-------------|
| Q9R1P4 | Psma1    | Proteasome subunit alpha type-1                                     | 404.874  | 72.24  | 29547  | 15 | 585719.8223 | 579801.4052 | 534847.8862 | 534904.849  | 566035.2496 | 492976.0432 | 493599.3932 | 520179.4808 | 487805.3745 | 484124.1779 | 597387.0854 | 540163.8176 | 557857.9064 | 556868.9128 | 543309.5834 |
| Q9R1Q6 | Tmem176b | Transmembrane protein 176B                                          | 40.262   | 10.27  | 28367  | 2  | 25442.97959 | 24338.20187 | 36452.89971 | 20041.37662 | 15093.6382  | 23938.88555 | 38504.30806 | 42079.84568 | 23784.40408 | 27973.71121 | 25998.06227 | 11723.51133 | 25077.2054  | 31643.6523  | 24126.13388 |
| Q9R1T2 | Sae1     | SUMO-activating enzyme subunit 1                                    | 585.544  | 59.71  | 38620  | 16 | 219299.1363 | 228124.9509 | 232350.6305 | 238780.8995 | 246300.9718 | 181859.4783 | 194478.2919 | 200926.4018 | 205296.8038 | 192365.2242 | 226353.4873 | 232004.4376 | 220380.1775 | 234566.3857 | 215102.0482 |
| Q9R1T4 | Sept6    | Septin-6                                                            | 90.798   | 11.52  | 49620  | 4  | 46572.42678 | 54701.7471  | 55624.15391 | 49398.27884 | 49128.06234 | 53033.25682 | 53172.66529 | 51041.5536  | 49893.22284 | 53362.32046 | 53716.65048 | 53819.74268 | 47598.67307 | 54774.07883 | 46474.73625 |
| Q9R233 | Tapbp    | Tapasin                                                             | 125.12   | 16.56  | 49736  | 6  | 114049.148  | 96370.46479 | 117525.2623 | 105519.4902 | 99296.9203  | 175493.1108 | 141491.6193 | 148811.686  | 153991.9272 | 137235.5014 | 132206.8227 | 114484.2796 | 125841.1597 | 129920.8579 | 119027.7912 |
| Q9WTI7 | Myo1c    | Unconventional myosin-1c                                            | 1374.976 | 35.84  | 121944 | 31 | 364137.9191 | 345903.7826 | 351800.0819 | 369291.6288 | 352050.9748 | 345314.6093 | 368776.7444 | 360182.5742 | 331628.1063 | 373121.2795 | 353663.379  | 340439.1053 | 350782.2549 | 333706.5556 | 370761.6929 |
| Q9WTK5 | NfkB2    | Nuclear factor NF-kappa-B p100 subunit                              | 69.018   | 2.89   | 96832  | 2  | 7230.348235 | 8974.680767 | 9724.162827 | 8491.145404 | 7064.710812 | 12677.58735 | 14513.73118 | 13234.47562 | 14828.39104 | 12786.71262 | 9770.070835 | 8243.811219 | 8493.349071 | 9966.992583 | 9974.08059  |
| Q9WTM5 | Ruvb12   | RuvB-like 2                                                         | 332.26   | 30.24  | 51113  | 12 | 177540.0699 | 192068.8804 | 165681.8486 | 178923.1053 | 201608.358  | 181638.0226 | 187625.1728 | 179276.8591 | 188426.1119 | 185440.6451 | 181075.7299 | 168327.5347 | 165672.9289 | 182341.9157 | 181448.1825 |
| Q9WTP6 | Ak2      | Adenylate kinase 2, mitochondrial                                   | 334.009  | 47.28  | 26469  | 8  | 210552.7156 | 192785.9638 | 173446.7533 | 177230.9083 | 181871.4046 | 159255.0628 | 173316.2055 | 166646.8679 | 168155.3121 | 153792.0275 | 172231.7317 | 173278.178  | 164407.4104 | 165799.8085 | 170770.4678 |
| Q9WTP7 | Ak3      | GTP:AMP phosphotransferase AK3, mitochondrial                       | 230.256  | 42.73  | 25426  | 6  | 39277.97071 | 36013.71716 | 26729.06616 | 30179.04351 | 31388.53509 | 26296.62671 | 23875.48756 | 30968.37308 | 24162.39357 | 32248.56545 | 33486.08366 | 29753.94847 | 32766.49465 | 26338.77817 | 37023.62229 |
| Q9WTR1 | Trpv2    | Transient receptor potential cation channel subfamily V member 2    | 299.97   | 9.66   | 85965  | 5  | 26026.13628 | 29525.13046 | 15265.36349 | 25676.22192 | 25340.54869 | 23370.27943 | 28943.78292 | 26199.21052 | 28178.90835 | 23061.28955 | 18222.98281 | 26616.34012 | 30343.32378 | 28066.43959 | 33909.14637 |
| Q9WTX6 | Cul1     | Cullin-1                                                            | 217.197  | 8.12   | 89692  | 5  | 16812.38569 | 22122.21933 | 8329.331964 | 23033.04566 | 5787.993105 | 4533.429054 | 18722.72555 | 18437.36217 | 9877.599359 | 9135.375463 | 9542.752405 | 19960.89935 | 10227.09508 | 9214.324074 | 9551.453967 |
| Q9WU28 | Pfdn5    | Prellin subunit 5                                                   | 128.072  | 21.43  | 17356  | 2  | 12882.21079 | 9668.658133 | 9719.138595 | 9086.345444 | 9440.790858 | 9860.006856 | 8398.027441 | 7896.29882  | 8122.340901 | 7305.617152 | 9523.096004 | 8913.21573  | 7436.118342 | 7226.129286 | 7729.553307 |
| Q9WU78 | Pcdc6ip  | Programmed cell death 6-interacting protein                         | 1224.259 | 53.39  | 96024  | 35 | 690145.7785 | 697809.2723 | 652313.1694 | 669418.5999 | 644850.8759 | 524275.1133 | 584867.8049 | 575161.6385 | 569634.1672 | 543271.722  | 632398.35   | 640817.4434 | 622081.3182 | 627895.6637 | 658879.658  |
| Q9WU81 | Slc37a2  | Glucose-6-phosphate exchanger SLC37A2                               | 189.923  | 12.38  | 55073  | 4  | 144053.719  | 143711.8602 | 131288.2431 | 129623.7735 | 117957.5349 | 90748.04981 | 103616.9105 | 92056.37105 | 97515.66311 | 110851.6411 | 127302.2636 | 128759.3773 | 139410.1866 | 129921.5387 | 135314.0553 |
| Q9WUA2 | Far1b    | Phenylalanine-tRNA ligase beta subunit                              | 390.165  | 25.81  | 65697  | 13 | 246351.7362 | 270022.1707 | 261095.4021 | 263642.6242 | 264676.5476 | 249485.5248 | 280619.7777 | 273780.5899 | 255271.2995 | 256600.2804 | 264064.7124 | 270159.1709 | 257010.5917 | 263359.2377 | 266453.8056 |
| Q9WUA3 | Pfkfb    | ATP-dependent 6-phosphofructokinase, platelet type                  | 1753.233 | 65.31  | 85455  | 44 | 1310137.888 | 1409160.101 | 1314621.481 | 1351441.956 | 1326130.772 | 1471971.737 | 1440983.958 | 1431499.936 | 1463862.025 | 1444233.607 | 1414355.838 | 1405264.525 | 1402977.499 | 1463378.701 | 1364086.033 |
| Q9WUB3 | Pygm     | Glycogen phosphorylase, muscle form                                 | 193.969  | 9.26   | 97286  | 5  | 75116.23915 | 71159.59418 | 66385.51946 | 63793.93094 | 66279.00463 | 55134.71948 | 61030.63531 | 64176.75481 | 65518.05106 | 65967.87269 | 67613.88145 | 61130.57762 | 72175.90191 | 74899.71327 | 65230.01201 |
| Q9WUL7 | Arl3     | ADP-ribosylation factor-like protein 3                              | 124.646  | 32.42  | 20487  | 4  | 35940.057   | 36684.98365 | 32928.00838 | 34936.96622 | 31840.03903 | 31589.8625  | 29140.04648 | 32005.62859 | 33650.07562 | 31303.65471 | 37185.36329 | 35078.93101 | 32918.00768 | 32549.43724 | 31492.93144 |
| Q9WUM3 | Coro1b   | Coronin-1B                                                          | 170.612  | 30.17  | 53912  | 7  | 127743.1582 | 114185.9356 | 101870.9111 | 99212.87076 | 109173.7786 | 92841.26982 | 88602.78369 | 88641.47917 | 98994.65758 | 80096.55498 | 103553.1076 | 105825.8707 | 105622.5335 | 105706.4913 | 99308.72731 |
| Q9WUM4 | Coro1c   | Coronin-1C                                                          | 654.857  | 39.87  | 53121  | 16 | 455333.888  | 421010.1259 | 409205.5575 | 438327.8084 | 400118.3332 | 359136.6661 | 417711.5492 | 367556.8143 | 383985.3009 | 367722.9008 | 403225.1796 | 405382.6339 | 400407.041  | 425469.0973 | 403345.6177 |
| Q9WUM5 | Suc1g    | Succinate-CoA ligase [ADP/GDP-forming] subunit alpha, mitochondrial | 257.113  | 25.72  | 36155  | 7  | 111191.023  | 115820.3779 | 110414.8777 | 112917.1684 | 113397.3267 | 107335.8818 | 96317.60401 | 98143.53312 | 99810.84203 | 99436.90027 | 103952.2423 | 96258.75694 | 95557.38244 | 88494.0998  | 101153.1405 |
| Q9WUN2 | Tbk1     | Serine/threonine-protein kinase TBK1                                | 31.136   | 5.62   | 83425  | 3  | 16584.07609 | 18742.37157 | 17095.98576 | 15656.50804 | 16659.26111 | 17118.58915 | 16857.77719 | 17866.26307 | 17567.05443 | 15118.70019 | 16203.44382 | 12689.38606 | 18577.50154 | 18516.71627 | 15177.82907 |
| Q9WUP7 | Uchl5    | Ubiquitin carboxyl-terminal hydrolase isozyme L5                    | 303.691  | 52.89  | 37617  | 14 | 152318.1751 | 179440.3721 | 159392.6739 | 168056.0629 | 158087.0071 | 166656.097  | 169877.7359 | 167029.3399 | 168905.4004 | 163416.0224 | 163461.8571 | 163992.108  | 153604.0254 | 159853.5865 | 161451.5527 |
| Q9WUR2 | Eci2     | Enoyl-CoA delta isomerase 2, mitochondrial                          | 34.15    | 4.86   | 43268  | 2  | 10634.16209 | 9772.734934 | 10683.46743 | 11482.94971 | 14309.25572 | 12381.70243 | 10858.95719 | 11064.15136 | 14396.02934 | 13917.46822 | 10859.38021 | 10875.84046 | 12351.30067 | 13327.16338 | 16285.12191 |
| Q9WUT3 | Rps6ka2  | Ribosomal protein S6 kinase alpha-2                                 | 109.358  | 6.96   | 83157  | 5  | 36831.26527 | 35823.11782 | 31669.55149 | 34055.72404 | 34882.26362 | 33494.97243 | 33954.45104 | 36470.3223  | 35160.95816 | 34200.34913 | 31091.3461  | 24541.78643 | 37834.6225  | 28509.36508 | 38567.86311 |
| Q9WUJ7 | Ctsz     | Cathepsin Z                                                         | 406.55   | 49.67  | 33996  | 11 | 1261812.972 | 1262562.612 | 1102909.948 | 1266830.527 | 1247926.357 | 1000741.723 | 1010848.769 | 1017789.959 | 988577.9324 | 1012053.003 | 1198487.747 | 1250978.205 | 1175343.191 | 1215839.04  | 1158755.422 |
| Q9WV32 | Arcp1b   | Actin-related protein 2/3 complex subunit 1B                        | 836.032  | 70.7   | 41064  | 22 | 1893889.304 | 1737714.757 | 1808893.126 | 1777751.39  | 1763437.56  | 1589770.982 | 1780959.183 | 1739684.69  | 1685662.451 | 1563053.403 | 1609996.258 | 1691531.047 | 1667150.876 | 1809515.53  | 1748550.403 |
| Q9WV54 | Asah1    | Acid ceramidase                                                     | 610.897  | 45.18  | 44670  | 17 | 351943.1996 | 320076.3785 | 265283.7599 | 286804.0263 | 269999.5459 | 208872.4191 | 209983.2459 | 204007.3545 | 230132.8764 | 235988.5699 | 289281.616  | 230818.8192 | 289832.4801 | 279092.6766 | 270488.3797 |
| Q9WV55 | Vapa     | Vesicle-associated membrane protein-associated protein A            | 257.742  | 42.57  | 27855  | 7  | 113335.2173 | 102930.9814 | 98185.4852  | 112619.9696 | 102308.3794 | 105105.6583 | 101430.8602 | 122582.2969 | 110442.2408 | 105959.6892 | 110275.7957 | 111987.9635 | 111965.9915 | 104779.5998 | 92646.83436 |
| Q9WV80 | Snx1     | Sorting nexin-1                                                     | 300.524  | 20.88  | 58952  | 9  | 70033.91869 | 76431.82304 | 63484.02937 | 68735.22987 | 74625.65408 | 73914.80059 | 70639.02622 | 70109.24366 | 70550.28024 | 65649.23384 | 64667.05683 | 72555.26043 | 71438.35486 | 68015.71553 | 76070.39049 |
| Q9WVA3 | Bub3     | Mitotic checkpoint protein BUB3                                     | 206.598  | 23.62  | 36955  | 6  | 78797.85327 | 81044.59412 | 83952.21046 | 84155.28508 | 92302.97041 | 76880.30173 | 76641.89115 | 81326.91567 | 76077.14891 | 76187.51969 | 76993.68277 | 77832.60005 | 74344.16522 | 77678.8842  | 85993.82548 |
| Q9WVA4 | Tagln2   | Transgelin-2                                                        | 924.244  | 84.42  | 22395  | 24 | 1146786.56  | 1119708.58  | 957532.2966 | 990102.9667 | 1017330.119 | 858507.9383 | 908464.7056 | 772943.5019 | 928466.7745 | 949925.946  | 1033027.843 | 1034081.698 | 1103513.952 | 1036317.316 | 967108.518  |
| Q9WVJ2 | Psmd13   | 26S proteasome non-ATPase regulatory subunit 13                     | 718.896  | 59.31  | 42809  | 18 | 409674.1731 | 392482.6067 | 433081.4225 | 411740.4855 | 382934.0092 | 430049.0999 | 483360.6806 | 495696.6129 | 467172.653  | 427553.5839 | 406137.3724 | 459229.1495 | 402434.9397 | 437810.7553 | 358972.9892 |
| Q9WVQ5 | Apip     | Methylthioribulose-1-phosphate dehydratase                          | 113.666  | 9.13   | 26949  | 2  | 15659.99539 | 18947.80459 | 16886.63919 | 16133.59229 | 17914.34603 | 2786.560701 | 13570.24138 | 12105.81752 | 12950.00287 | 11856.92941 | 15368.08854 | 14059.77617 | 15132.11014 | 13009.15023 | 15248.94945 |
| Q9Z0F8 | Adam17   | Disintegrin and metalloproteinase domain-containing protein 17      | 43.267   | 2.78   | 93056  | 2  | 7415.592474 | 9583.354084 | 19118.2697  | 15718.26855 | 15364.79661 | 18106.62668 | 23536.29659 | 19422.80941 | 9076.837116 | 7966.141112 | 8189.687393 | 7802.524357 | 17280.3713  | 17230.72028 | 17189.62255 |
| Q9Z0J0 | Npc2     | NPC intracellular cholesterol transporter 2                         | 140.289  | 41.61  | 16442  | 5  | 148860.8603 | 124912.9274 | 110178.2044 | 109680.7134 | 108067.9885 | 87267.87612 | 88934.98851 | 76808.34288 | 83077.53223 | 70873.33788 | 88793.34861 | 91576.18739 | 89583.30141 | 97650.27628 | 103709.4075 |
| Q9Z0M5 | Lipa     | Lysosomal acid lipase/cholesteryl ester hydrolase                   | 246.757  | 32.75  | 45325  | 11 | 138840.9042 | 168603.8993 | 127271.349  | 145809.7535 | 114750.1254 | 213546.0486 | 251590.4662 | 268659.9115 | 270924.9889 | 166806.2631 | 167484.1664 | 215060.1769 | 152931.3526 | 153549.0449 | 170640.7346 |
| Q9Z0P5 | Twf2     | Twinfilin-2                                                         | 458.829  | 52.44  | 39471  | 11 | 205772.1384 | 104010.5692 | 104623.2904 | 97996.58065 | 103798.6641 | 78118.62737 | 89882.15352 | 91012.88751 | 91020.89098 | 86924.92236 | 96943.14185 | 99161.7758  | 103876.0312 | 99905.51871 | 104971.2027 |
| Q9Z0R9 | Fads2    | Fatty acid desaturase 2                                             | 26.472   | 4.95</ |        |    |             |             |             |             |             |             |             |             |             |             |             |             |             |             |             |

|        |          |                                                                 |          |       |        |    |             |             |             |             |             |             |             |             |             |             |             |             |             |             |             |
|--------|----------|-----------------------------------------------------------------|----------|-------|--------|----|-------------|-------------|-------------|-------------|-------------|-------------|-------------|-------------|-------------|-------------|-------------|-------------|-------------|-------------|-------------|
| Q9Z1G3 | Atp6v1c1 | V-type proton ATPase subunit C 1                                | 536.893  | 54.71 | 43888  | 16 | 231747.6547 | 231552.888  | 197843.971  | 221378.6203 | 218160.476  | 199840.5284 | 213112.8185 | 228607.1098 | 216870.2234 | 197551.399  | 237121.4008 | 256881.6831 | 224403.7144 | 222878.5769 | 237288.6318 |
| Q9Z1Q5 | Clic1    | Chloride intracellular channel protein 1                        | 697.267  | 82.99 | 27013  | 16 | 1466844.442 | 1411935.205 | 1368937.565 | 1446912.411 | 1406327.458 | 1380380.422 | 1336528.413 | 1298901.311 | 1347960.787 | 1278786.229 | 1370944.304 | 1391726.172 | 1423905.857 | 1407922.64  | 1421554.767 |
| Q9Z1Q9 | Vars     | Valine--tRNA ligase                                             | 1585.913 | 49.56 | 140215 | 42 | 760587.9538 | 788702.8541 | 795669.3931 | 799443.4992 | 766977.2885 | 719910.5572 | 788623.0608 | 795480.8968 | 759931.8991 | 675189.5784 | 739181.6933 | 831733.4523 | 759587.0261 | 727549.067  | 728223.8329 |
| Q9Z1R2 | Bag6     | Large proline-rich protein BAG6                                 | 133.391  | 4.68  | 121037 | 3  | 26210.75581 | 23750.36206 | 25905.87106 | 25830.22997 | 25259.82431 | 24387.20209 | 29126.10197 | 29939.94929 | 28144.9933  | 26435.02815 | 25314.38404 | 27916.33912 | 24957.10663 | 23943.97671 | 26406.35538 |
| Q9Z1T1 | Ap3b1    | AP-3 complex subunit beta-1                                     | 129.11   | 7.15  | 122740 | 6  | 24563.0702  | 35348.56111 | 23257.80839 | 26384.11419 | 25014.37996 | 21909.49123 | 21802.82088 | 29350.03938 | 24854.29434 | 23611.56478 | 29573.41495 | 23077.20299 | 24424.83767 | 25932.80332 | 24014.9407  |
| Q9Z1W8 | Atp12a   | Potassium-transporting ATPase alpha chain 2                     | 91.022   | 2.71  | 114727 | 5  | 123549.3314 | 128740.8332 | 120077.5054 | 112112.8443 | 128795.2911 | 134062.0396 | 112799.0506 | 116756.8025 | 130902.6653 | 119130.0773 | 127587.7748 | 126588.8109 | 139749.8835 | 129460.8637 | 137541.5864 |
| Q9Z1X4 | Ilf3     | Interleukin enhancer-binding factor 3                           | 135.001  | 6.57  | 96021  | 5  | 35659.01248 | 42492.93403 | 42159.23296 | 37478.91872 | 38947.11134 | 31455.88188 | 36368.3678  | 39248.09758 | 37132.72221 | 37003.18619 | 38070.32878 | 39058.70122 | 30490.62027 | 36511.62699 | 37382.51231 |
| Q9Z1Z0 | Uso1     | General vesicular transport factor p115                         | 76.005   | 5.21  | 106983 | 4  | 31116.17304 | 28898.1041  | 28935.53106 | 20147.81645 | 31507.13776 | 23605.10991 | 33999.66498 | 23591.62645 | 30069.36631 | 26492.74785 | 28229.45749 | 28994.76831 | 30818.56777 | 31112.36677 | 30868.52467 |
| Q9Z204 | HnrnpC   | Heterogeneous nuclear ribonucleoproteins C1/C2                  | 536.73   | 32.91 | 34385  | 13 | 270156.3485 | 277721.5266 | 303275.1004 | 304417.3877 | 246393.4926 | 290279.2876 | 300666.2659 | 316757.1785 | 276586.3215 | 260095.3909 | 265135.9324 | 273016.2337 | 310590.3513 | 328553.607  | 301388.1152 |
| Q9Z277 | Baz1b    | Tyrosine-protein kinase BAZ1B                                   | 36.765   | 1.89  | 170651 | 2  | 14092.45279 | 16806.10767 | 13652.22116 | 18488.29952 | 12777.96815 | 10876.85231 | 12545.68157 | 11050.42816 | 11340.09699 | 11442.39434 | 13911.39066 | 15567.18979 | 13253.59903 | 12953.7148  | 10144.2278  |
| Q9Z2I0 | Letm1    | Mitochondrial proton/calcium exchanger protein                  | 193.315  | 13.69 | 82989  | 6  | 25228.59512 | 16992.29056 | 16040.80692 | 14474.11089 | 14653.35826 | 20148.51978 | 15000.56205 | 14342.24093 | 19727.69693 | 18416.88503 | 16403.25455 | 16498.99941 | 14662.73593 | 16937.05365 | 21648.24209 |
| Q9Z2I8 | Suclg2   | Succinate--CoA ligase [GDP-forming] subunit beta, mitochondrial | 666.326  | 45.96 | 46840  | 16 | 270662.9262 | 263768.8394 | 274797.5384 | 265124.6929 | 279832.2975 | 280132.5431 | 256868.9696 | 252201.4649 | 273159.8355 | 268497.4718 | 281135.9023 | 255949.8825 | 284164.0498 | 288174.5641 | 268723.7107 |
| Q9Z2I9 | Sucla2   | Succinate--CoA ligase [ADP-forming] subunit beta, mitochondrial | 139.405  | 13.17 | 50114  | 5  | 95377.66194 | 95227.31491 | 99481.71548 | 91313.11136 | 97710.12336 | 99400.56086 | 98038.42562 | 102029.2767 | 101471.8486 | 91476.72327 | 72903.09965 | 98035.75351 | 97306.23952 | 104578.681  | 100482.3139 |
| Q9Z2L0 | Vdac1    | Voltage-dependent anion-selective channel protein 1             | 927.384  | 69.61 | 30756  | 16 | 582097.9972 | 588944.3053 | 628100.5391 | 587331.8664 | 597040.6849 | 752395.0281 | 701629.7402 | 749488.8297 | 727244.9842 | 668743.3005 | 563672.0026 | 606288.2186 | 606241.4085 | 607004.7561 | 592585.8385 |
| Q9Z2L7 | Crtf3    | Cytokine receptor-like factor 3                                 | 120.444  | 20.81 | 49559  | 4  | 12060.71249 | 12930.60784 | 15233.03096 | 14266.27878 | 12511.37767 | 12413.55913 | 12812.28124 | 13628.40304 | 13144.7785  | 9535.932598 | 12442.18864 | 9490.50431  | 9457.137895 | 10428.51042 | 11696.25121 |
| Q9Z2N8 | Actf6a   | Actin-like protein 6A                                           | 214.878  | 23.08 | 47448  | 6  | 61167.21663 | 72677.32564 | 87867.31034 | 65320.69501 | 64764.30665 | 75315.21591 | 87233.86272 | 82335.97493 | 75028.40155 | 79228.16538 | 80904.7261  | 84241.60911 | 68907.96047 | 79848.67914 | 82310.52641 |
| Q9Z2U0 | Pasma7   | Proteasome subunit alpha type-7                                 | 505.459  | 55.24 | 27855  | 11 | 344010.7748 | 367159.8879 | 350295.1565 | 370689.4884 | 356109.214  | 326438.8091 | 365718.6942 | 366362.4485 | 343149.5432 | 322172.6834 | 348779.0084 | 341083.1418 | 369822.8623 | 348911.1771 | 361970.2578 |
| Q9Z2U1 | Pasma5   | Proteasome subunit alpha type-5                                 | 463.579  | 49.38 | 26411  | 10 | 240078.7112 | 262830.4949 | 238075.2394 | 267316.3299 | 244283.4833 | 209176.4463 | 235651.0311 | 260757.9064 | 248900.2129 | 226611.558  | 240004.8357 | 276362.6187 | 276595.6442 | 253573.3447 | 262621.5703 |
| Q9Z2W0 | Dnpep    | Aspartyl aminopeptidase                                         | 583.343  | 48.2  | 52207  | 13 | 164357.5979 | 176846.2518 | 145878.4345 | 158189.4778 | 146651.803  | 133409.5952 | 139238.3809 | 139647.1886 | 146890.0132 | 134500.7072 | 164843.4598 | 157738.1394 | 157482.7138 | 149179.4595 | 151149.0301 |
| Q9Z2Y8 | Plpbp    | Pyridoxal phosphate homeostasis protein                         | 53.737   | 10.58 | 30049  | 2  | 71406.86938 | 63483.07675 | 79575.92714 | 58337.39483 | 62282.7271  | 59697.61024 | 69016.09097 | 69232.8894  | 68540.70425 | 81162.23654 | 61365.204   | 67698.01451 | 57778.87488 | 62085.15796 | 64882.47701 |
| Q9Z329 | Itp2     | Inositol 1,4,5-trisphosphate receptor type 2                    | 59.577   | 1.59  | 307475 | 5  | 19988.04316 | 24841.71885 | 19977.74514 | 27624.07033 | 22542.79928 | 25872.80246 | 21248.51949 | 25387.28896 | 25725.97779 | 23361.67808 | 25324.92083 | 23316.45465 | 23656.156   | 27867.31745 | 21060.60574 |
