# Supplementary material for: Repeated Exposure of Macrophages to Synthetic Amorphous Silica Induces Adaptive Proteome Changes and a Moderate Cell Activation
Source: MDPI journal article supplement (doi:10.3390/nano12091424), 2022-04-22
Supplement: s1 [file s1]

Table S7: proteins linked to cell redox homeostasis

| accession number | gene_name | description                                                  | ratio rPr/ctrl | ratio Fu/ctrl | T test Pr vs. ctrl | T test Fu vs ctrl |
|------------------|-----------|--------------------------------------------------------------|----------------|---------------|--------------------|-------------------|
| P28352           | Apex1     | DNA-(apurinic or apyrimidinic site) lyase                    | 0.819428       | 0.879555      | 0.030341           | 0.0549714         |
| Q8R180           | Ero1a     | ERO1-like protein alpha                                      | 1.4267517      | 1.0507847     | 0.0005103          | 0.4003907         |
| Q8BZW8           | Nhlrc2    | NHL repeat-containing protein 2                              | 1.5002926      | 1.4896671     | 0.0317271          | 0.0348889         |
| P09103           | P4hb      | Protein disulfide-isomerase                                  | 1.3321121      | 1.0523063     | 0.0002386          | 0.0305743         |
| P27773           | Pdia3     | Protein disulfide-isomerase A3                               | 1.0986432      | 1.0465273     | 0.0002576          | 0.0101618         |
| P08003           | Pdia4     | Protein disulfide-isomerase A4                               | 1.1827833      | 1.0572835     | 0.000747           | 0.1560396         |
| Q922R8           | Pdia6     | Protein disulfide-isomerase A6                               | 1.1337347      | 0.9820241     | 0.0008646          | 0.3990531         |
| P35700           | Prdx1     | Peroxiredoxin-1                                              | 1.1591502      | 1.1129194     | 1.406E-05          | 0.0036429         |
| P20108           | Prdx3     | Thioredoxin-dependent peroxide reductase, mitochondrial Prx3 | 1.1574755      | 1.0696558     | 0.0024859          | 0.0692717         |
| O08807           | Prdx4     | Peroxiredoxin-4                                              | 1.2954477      | 1.1735089     | 0.0002375          | 0.0046681         |
| P99029           | Prdx5     | Peroxiredoxin-5, mitochondrial                               | 0.7588895      | 0.8574633     | 0.0039337          | 0.0606011         |
| O08709           | Prdx6     | Peroxiredoxin-6                                              | 0.8286838      | 0.9322557     | 0.0016014          | 0.0868954         |
| Q91VW3           | Sh3bgrl3  | SH3 domain-binding glutamic acid-rich-like protein 3         | 0.7380794      | 1.4321918     | 0.0332647          | 0.4175075         |
| Q8VBT0           | Tmx1      | Thioredoxin-related transmembrane protein 1                  | 1.1900357      | 0.9962529     | 0.0004372          | 0.9396225         |
| Q9JMH6           | Txnrd1    | Thioredoxin reductase 1, cytoplasmic                         | 1.3005555      | 1.0432999     | 0.0074358          | 0.5895408         |
| P46413           | Gss       | Glutathione synthetase                                       | 0.7014626      | 0.8743287     | 0.0240252          | 0.1522542         |
| P47791           | Gsr       | Glutathione reductase, mitochondrial                         | 0.9701236      | 0.9343079     | 0.2482618          | 0.0039174         |
