# Supplementary material for: Repeated Exposure of Macrophages to Synthetic Amorphous Silica Induces Adaptive Proteome Changes and a Moderate Cell Activation
Source: MDPI journal article supplement (doi:10.3390/nano12091424), 2022-04-22
Supplement: s1 [file s1]

Table S4: results of the pathway analysis by the DAVID tool using proteins modulated by precipitated silica  
cutoff value for cluster selection: FDR≤0.1

| Annotation Cluster 1 |                                                            | Enrichment Score: 19.09662544270277 |                      |                                                                                                                                                                                                                                                                                                                                                                                                                                                 |                  |                      |  |  |
|----------------------|------------------------------------------------------------|-------------------------------------|----------------------|-------------------------------------------------------------------------------------------------------------------------------------------------------------------------------------------------------------------------------------------------------------------------------------------------------------------------------------------------------------------------------------------------------------------------------------------------|------------------|----------------------|--|--|
| Category             | Term                                                       | Count                               | PValue               | Genes                                                                                                                                                                                                                                                                                                                                                                                                                                           | Fold Enrichment  | FDR                  |  |  |
| GOTERM_MF_DIRECT     | GO:0098641~cadherin binding involved in cell-cell adhesion | 53                                  | 2.10611223169521E-22 | Q9D8U8, O08709, P19096, Q9Z0P5, Q99KN9, O35685, O08992, P60335, P47753, Q5FWK3, P52480, P47911, P47757, Q9CR57, P24452, Q99LX0, Q62418, Q9CPV4, P11499, P18572, Q7M6Y3, P16546, Q9DBG5, P42932, Q9CWK8, P06151, E9PVA8, O88844, P05064, Q922Q8, P62962, Q9WVA4, Q62261, P59325, Q9DCL9, Q9CWXJ9, A2AGT5, Q8VDD5, A2APV2, P62855, O54988, Q99KH8, P26039, P61979, Q61029, Q9Z1Q5, Q9WUM3, Q9EQP2, P35700, Q62433, Q61191, P17182, Q9WUA3         | 5.11437452984645 | 1.0330480496465E-19  |  |  |
| GOTERM_CC_DIRECT     | GO:0005913~cell-cell adherens junction                     | 54                                  | 2.7573349787343E-22  | Q62523, Q9D8U8, O08709, P19096, Q9Z0P5, Q99KN9, O35685, O08992, P60335, P47753, Q5FWK3, P52480, P47911, P47757, Q9CR57, P24452, Q99LX0, Q62418, Q9CPV4, P11499, P18572, Q7M6Y3, P16546, Q9DBG5, P42932, Q9CWK8, P06151, E9PVA8, O88844, P05064, Q922Q8, P62962, Q9WVA4, Q62261, P59325, Q9DCL9, Q9CWXJ9, A2AGT5, Q8VDD5, A2APV2, P62855, O54988, Q99KH8, P26039, P61979, Q61029, Q9Z1Q5, Q9WUM3, Q9EQP2, P35700, Q62433, Q61191, P17182, Q9WUA3 | 5.0223647613101  | 1.90256113532667E-20 |  |  |

|                  |                               |    |                      |                                                                                                                                                                                                                                                                                                                      |                  |                      |
|------------------|-------------------------------|----|----------------------|----------------------------------------------------------------------------------------------------------------------------------------------------------------------------------------------------------------------------------------------------------------------------------------------------------------------|------------------|----------------------|
| GOTERM_BP_DIRECT | GO:0098609~cell-cell adhesion | 35 | 8.83390310365848E-15 | O08709, Q9D8U8, Q9Z0P5,<br>P59325, Q9DCL9, Q9CWX9,<br>A2AGT5, Q99KN9, O35685,<br>A2APV2, P62855, P47753,<br>Q5FWK3, O54988, Q99KH8,<br>P47757, P26039, Q9CR57, Q61029,<br>P24452, Q62418, Q9CPV4, P18572,<br>Q9EQP2, Q62433, P35700,<br>Q9DBG5, Q61191, P06151,<br>O88844, P05064, P17182,<br>Q9WUA3, Q922Q8, Q9WVA4 | 5.08893391872115 | 1.21775354283932E-11 |
|------------------|-------------------------------|----|----------------------|----------------------------------------------------------------------------------------------------------------------------------------------------------------------------------------------------------------------------------------------------------------------------------------------------------------------|------------------|----------------------|

**Annotation Cluster 2** Enrichment Score: 16.781319002796423

| Category    | Term     | Count | PValue               | Genes                                                                                                                                                                                                                                                                                                                                                                                      | Fold Enrichment  | FDR                  |
|-------------|----------|-------|----------------------|--------------------------------------------------------------------------------------------------------------------------------------------------------------------------------------------------------------------------------------------------------------------------------------------------------------------------------------------------------------------------------------------|------------------|----------------------|
| UP_KEYWORDS | Lysosome | 43    | 7.05284865873525E-20 | Q8BFR4, Q9Z0J0, Q9WV54,<br>Q9CQW9, O08709, P20060,<br>O70370, P51569, P97821, P18242,<br>Q9ESY9, Q9CQ22, P70665,<br>P52875, Q571E4, Q9JHJ3,<br>Q8VEH3, Q9QWR8, O88531,<br>Q8VEB4, O89023, P10605, P23780,<br>Q8VE99, Q9Z0M5, Q61207,<br>P48441, Q8K2I4, P50428, P17439,<br>Q9WUU7, P12265, O09159,<br>P16675, P50429, O89017, Q9JHS3,<br>P24668, Q7TMR0, Q3TCN2,<br>P29416, O70404, O88384 | 5.73444583605285 | 3.09149866207895E-18 |

|                  |                     |    |                      |                                                                                                                                                                                                                                                                                                                                                                                                                |                  |                      |
|------------------|---------------------|----|----------------------|----------------------------------------------------------------------------------------------------------------------------------------------------------------------------------------------------------------------------------------------------------------------------------------------------------------------------------------------------------------------------------------------------------------|------------------|----------------------|
| GOTERM_CC_DIRECT | GO:0005764~lysosome | 50 | 2.37199097867177E-18 | Q8BFR4, O08709, O70370, P97821, P18242, P70665, P52875, Q9JHJ3, Q8VEH3, P16460, O88531, P04441, O89023, P10605, Q9Z0M5, Q61207, P48441, P50428, P17439, P12265, P16675, P50429, O89017, Q7TMR0, O70404, P29416, Q9Z0J0, Q9WV54, Q9CQW9, P20060, O08529, P51569, Q9ESY9, Q9CQ22, Q571E4, O54782, Q9QWR8, Q8VEB4, O70439, P08228, P23780, Q8VE99, P24270, Q8K2I4, Q9WUU7, O09159, Q9JHS3, P24668, Q3TCN2, O88384 | 4.43959736089849 | 1.27296849188719E-16 |
| KEGG_PATHWAY     | mmu04142:Lysosome   | 33 | 2.70748085207608E-14 | Q8BFR4, Q9Z0J0, Q9WV54, P20060, Q68FD5, O70370, P51569, P97821, P18242, P51863, Q571E4, O35643, Q9QWR8, O88531, Q8VEB4, O89023, P10605, P23780, Q9Z0M5, Q61207, Q8R0H9, P48441, Q8K2I4, P50428, P17439, Q9WUU7, P12265, O09159, P16675, P50429, O89017, P24668, P29416                                                                                                                                         | 4.97691975841242 | 6.41672961942032E-12 |

**Annotation Cluster 3** Enrichment Score: 10.497346398991686

|          |      |       |        |       |                 |     |
|----------|------|-------|--------|-------|-----------------|-----|
| Category | Term | Count | PValue | Genes | Fold Enrichment | FDR |
|----------|------|-------|--------|-------|-----------------|-----|

|                  |                                                    |    |                      |                                                                                                                                                                                                                                                                                                                                                                                                        |                  |                      |
|------------------|----------------------------------------------------|----|----------------------|--------------------------------------------------------------------------------------------------------------------------------------------------------------------------------------------------------------------------------------------------------------------------------------------------------------------------------------------------------------------------------------------------------|------------------|----------------------|
| UP_KEYWORDS      | Ribonucleoprotein                                  | 46 | 1.12050450387712E-18 | Q9CX86, P62918, Q9EQK5, Q9D7S7, Q60668, Q921F4, P19253, Q8VDM6, P14115, Q61990, P63323, P62751, Q6DFW4, P62855, P60335, P62317, P47911, P62830, P62908, Q9CR57, P61979, P62309, P62849, P70333, Q9JIK9, P14206, Q64012, P14148, P62242, P63276, O55142, P14131, P62267, P61255, P84099, Q9D8E6, O88569, P62305, P62702, P62307, P27659, O35737, P60867, Q8CCF0, P41105, P62843                         | 4.9594037002529  | 4.20989549313831E-17 |
| GOTERM_CC_DIRECT | GO:0030529~intracellular ribonucleoprotein complex | 49 | 3.07572462802306E-18 | P62918, Q9EQK5, Q9D7S7, O70133, Q60668, P19253, Q6P5F9, P32067, P14115, Q61990, P62751, Q6DFW4, P60335, P62317, P47911, P62830, Q9CR57, P62849, Q60591, P14206, P70333, Q9JIK9, P62242, O55142, P14131, P57780, P84099, O88569, P60867, P62843, Q9CX86, Q921F4, Q8VDM6, P60710, P62908, Q6PB66, P61979, Q64012, P14148, P63276, P62267, Q9D8E6, P62305, P62702, P62307, P27659, O35737, Q8CCF0, P41105 | 4.50036434977578 | 1.48557499533514E-16 |

|                  |                                               |    |                      |                                                                                                                                                                                                                                                                                                                                                                                        |                  |                      |
|------------------|-----------------------------------------------|----|----------------------|----------------------------------------------------------------------------------------------------------------------------------------------------------------------------------------------------------------------------------------------------------------------------------------------------------------------------------------------------------------------------------------|------------------|----------------------|
| GOTERM_BP_DIRECT | GO:0006412~translation                        | 47 | 5.07021685167495E-12 | P62918, P51881, Q9D7S7, Q9CR62, P19253, O70251, P59325, Q922B2, P14115, P63323, P62751, Q9CZD3, Q8BMJ2, Q8BMJ3, P62855, P26638, Q8QZY1, P48962, P47911, P62830, Q99PL5, O89086, P05555, Q60872, P62908, Q9CR57, Q99JX4, P62849, Q3THG9, P10126, P14206, P14148, P62242, P63276, O55142, P14131, Q8R050, P62267, P61255, P84099, Q9D8E6, P62702, P27659, P60867, P41105, P60843, P62843 | 3.22087638047738 | 4.65952928668928E-09 |
| GOTERM_CC_DIRECT | GO:0005840~ribosome                           | 29 | 4.80108085276811E-11 | P62918, Q9D7S7, P19253, P14115, P62751, P62855, P47911, P62830, Q99PL5, P05555, P62908, Q9CR57, P62849, P35564, Q9JIK9, P14206, P14148, P62242, P63276, O55142, P14131, P62267, P84099, Q9D8E6, P62702, P27659, P60867, P41105, P62843                                                                                                                                                 | 4.53358458162389 | 1.54594803459133E-09 |
| UP_KEYWORDS      | Ribosomal protein                             | 28 | 1.01886353827528E-10 | P62918, Q9D7S7, P19253, P14115, P63323, P62751, P62855, P47911, P62830, P62908, Q9CR57, P62849, Q9JIK9, P14206, P14148, P62242, P63276, O55142, P14131, P62267, P61255, P84099, Q9D8E6, P62702, P27659, P60867, P41105, P62843                                                                                                                                                         | 4.58019891957389 | 2.23300925471999E-09 |
| GOTERM_MF_DIRECT | GO:0003735~structural constituent of ribosome | 32 | 1.4593378627042E-08  | P62918, P51881, Q9D7S7, Q9CR62, P19253, P14115, P63323, P62751, P62855, P48962, P47911, P62830, P05555, P62908, Q9CR57, P62849, Q9JIK9, P14206, P14148, P62242, P63276, O55142, P14131, P62267, P61255, P84099, Q9D8E6, P62702, P27659, P60867, P41105, P62843                                                                                                                         | 3.26337448559671 | 1.78951305414103E-06 |

|                                                                 |                                              |       |                      |                                                                                                                                                                                                                        |                  |                      |
|-----------------------------------------------------------------|----------------------------------------------|-------|----------------------|------------------------------------------------------------------------------------------------------------------------------------------------------------------------------------------------------------------------|------------------|----------------------|
| KEGG_PATHWAY                                                    | mmu03010:Ribosome                            | 27    | 5.06775372155885E-08 | P62918, Q9D7S7, P19253, P14115, P63323, P62751, P62855, P47911, P62830, P62908, Q9CR57, P62849, P14206, P14148, P62242, P63276, O55142, P14131, P62267, P61255, P84099, Q9D8E6, P62702, P27659, P60867, P41105, P62843 | 3.42611780234285 | 2.00176272001575E-06 |
| GOTERM_CC_DIRECT                                                | GO:0022625~cytosolic large ribosomal subunit | 16    | 3.9684178608124E-07  | P62918, Q9CR57, Q9D7S7, P19253, P14115, P14148, O55142, P62751, P63323, P61255, P84099, Q9D8E6, P27659, P47911, P62830, P41105                                                                                         | 5.1674961809491  | 8.33367750770603E-06 |
| GOTERM_CC_DIRECT                                                | GO:0022627~cytosolic small ribosomal subunit | 12    | 1.33183686026453E-06 | P63276, P62242, P62908, P14131, P62267, P63323, P62849, P62855, P62702, P14206, P60867, P62843                                                                                                                         | 6.65437008207124 | 2.38250816113989E-05 |
| <b>Annotation Cluster 4</b> Enrichment Score: 7.890100737654368 |                                              |       |                      |                                                                                                                                                                                                                        |                  |                      |
| Category                                                        | Term                                         | Count | PValue               | Genes                                                                                                                                                                                                                  | Fold Enrichment  | FDR                  |
| GOTERM_BP_DIRECT                                                | GO:0006457~protein folding                   | 25    | 3.19788636032583E-11 | Q8BYA0, P27773, P26883, P07901, P38647, O35685, P08003, P04441, Q922R8, P80315, Q9CQN1, P11499, P35564, Q64378, Q8R180, P17742, P14211, P42932, Q61390, P24369, P08113, P09103, Q8VBT0, P63038, P80317                 | 5.36723499240122 | 1.76331453908367E-08 |
| UP_KEYWORDS                                                     | Chaperone                                    | 25    | 3.55453489094184E-09 | Q8BYA0, P07901, P38647, Q9JKR6, P04441, Q922R8, P80315, Q9CQN1, Q99LX0, P70670, P11499, P35564, Q64378, O08997, P14211, P42932, Q9JK23, O08583, Q9CYG7, Q61390, Q9CQI6, P08113, P09103, P63038, P80317                 | 4.34639295378412 | 5.49907456657473E-08 |
| GOTERM_MF_DIRECT                                                | GO:0051082~unfolded protein binding          | 13    | 1.87954175748902E-05 | P80315, Q9CQN1, P07901, Q8VE99, P38647, P11499, P35564, P14211, P42932, O35685, Q61390, P08113, P80317                                                                                                                 | 4.66662551440329 | 0.000970437086367    |

**Annotation Cluster 5** Enrichment Score: 7.845354276928301

| Category         | Term                              | Count | PValue               | Genes                                                                                                                                                                                                                                                                                                  | Fold Enrichment  | FDR                  |
|------------------|-----------------------------------|-------|----------------------|--------------------------------------------------------------------------------------------------------------------------------------------------------------------------------------------------------------------------------------------------------------------------------------------------------|------------------|----------------------|
| UP_KEYWORDS      | Actin-binding                     | 28    | 1.25850830844516E-08 | Q7TPR4, Q3V0K9, Q61879, Q9Z0P5, Q62261, Q9CPW4, P18760, P40124, P61161, Q8VDD5, Q8R1S4, Q9JM76, P47753, P47754, P47757, P24452, O70200, Q62418, Q9WUM3, Q9WUM4, Q9D2V7, P16546, P13020, P57780, Q9CQI6, O88342, P62962, P28667                                                                         | 3.6896046852123  | 1.74204044800567E-07 |
| GOTERM_MF_DIRECT | GO:0003779~actin binding          | 37    | 1.35988946778766E-08 | Q7TPR4, Q3V0K9, Q61879, Q9Z0P5, Q62261, Q9CPW4, Q71LX4, P18760, P19973, P07091, P40124, P61161, Q8VDD5, Q8R1S4, Q9JM76, A2APV2, P47753, P47754, Q9ERL7, P47757, P26039, P24452, O70200, Q62418, Q9WUM3, Q9WUM4, Q9D2V7, P16546, P70315, Q9JL26, P13020, Q6ZPF4, P57780, Q9CQI6, O88342, P62962, P28667 | 2.94717473884141 | 1.78951305414103E-06 |
| GOTERM_MF_DIRECT | GO:0051015~actin filament binding | 22    | 1.70050327220895E-08 | Q7TPR4, Q3V0K9, P28650, Q61879, O70200, Q62418, Q9WUM3, Q9WUM4, Q9CPW4, Q71LX4, P18760, Q9JL26, P61161, Q8VDD5, Q8R1S4, Q9JM76, P57780, Q3UZA1, P47753, O88342, P47757, P26039                                                                                                                         | 4.48713991769547 | 1.85354856670775E-06 |

**Annotation Cluster 6** Enrichment Score: 6.9741174880617525

| Category | Term | Count | PValue | Genes | Fold Enrichment | FDR |
|----------|------|-------|--------|-------|-----------------|-----|
|----------|------|-------|--------|-------|-----------------|-----|

|                  |                                        |    |                      |                                                                                                                                                                                                                                                                                                                                                                                                                                                        |                  |                      |
|------------------|----------------------------------------|----|----------------------|--------------------------------------------------------------------------------------------------------------------------------------------------------------------------------------------------------------------------------------------------------------------------------------------------------------------------------------------------------------------------------------------------------------------------------------------------------|------------------|----------------------|
| UP_KEYWORDS      | Oxidoreductase                         | 48 | 1.82212176991372E-08 | P09528, P51660, Q91YR9, O08709, O08807, P19096, P99029, Q9DBB8, Q9CY64, Q9JMH6, Q9DCD0, Q9ESY9, Q8BVI4, Q9JLJ2, P52019, Q64105, Q62465, Q9DCN2, Q8C0L6, P22437, P36552, Q00612, P09671, P00405, P45376, Q00519, Q60597, Q3U4I7, Q8CIZ9, P08228, P24270, P51174, Q6P3A8, Q9JII6, Q99KP3, Q8R180, P35700, P20108, P14152, Q61093, P62482, P06151, O88844, O09131, Q9Z110, O70503, P48758, Q8BMS1                                                         | 2.4943806322562  | 2.3031695603651E-07  |
| GOTERM_BP_DIRECT | GO:0055114~oxidation-reduction process | 55 | 4.91978151291858E-08 | P09528, P51660, Q91YR9, O08709, P19096, Q9JMH6, Q8BVI4, Q9JLJ2, Q64105, Q9DCN2, Q8C0L6, P36552, P45376, Q8R111, Q00519, Q60597, Q8R180, Q61093, P06151, P62482, O88844, O09131, Q8BMS1, P48758, P50396, O08807, P99029, Q9DBB8, Q9CY64, Q9DCD0, Q9ESY9, P52019, Q62465, P22437, Q571I9, Q00612, P09671, P00405, Q3U4I7, Q8CIZ9, P08228, P24270, O70145, P51174, A2AAY5, Q6P3A8, Q9JII6, Q99KP3, P35700, P20108, P14152, Q3U9G9, Q8VBT0, Q9Z110, O70503 | 2.23581860038488 | 1.69547970388956E-05 |



|                                                     |      |  |    |                      |                                                                                                                                                                                                                                                                                                                                                                                                                        |                  |                      |
|-----------------------------------------------------|------|--|----|----------------------|------------------------------------------------------------------------------------------------------------------------------------------------------------------------------------------------------------------------------------------------------------------------------------------------------------------------------------------------------------------------------------------------------------------------|------------------|----------------------|
| GOTERM_MF_DIRECT GO:0016491~oxidoreductase activity |      |  | 51 | 9.63973960124413E-08 | P09528, P51660, Q91YR9, O08709, P19096, Q9JMH6, Q8BVI4, Q9JLJ2, Q64105, Q9DCN2, Q8C0L6, P36552, P45376, Q00519, Q60597, Q8R180, Q61093, P06151, P62482, O88844, O09131, Q8BMS1, P48758, P50396, O08807, P99029, Q9DBB8, Q9CY64, Q9DCD0, Q9ESY9, P52019, Q62465, P22437, Q57119, Q00612, P09671, P00405, Q3U4I7, Q8CIZ9, P08228, P28352, P24270, P51174, Q6P3A8, Q9JII6, Q99KP3, P35700, P20108, P14152, Q9Z110, O70503 | 2.27328611724307 | 8.59689504438227E-06 |
| UP_KEYWORDS                                         | NADP |  | 20 | 1.46872853362636E-06 | Q8CIZ9, Q91YR9, P24270, P19096, Q9DBB8, Q9CY64, Q9JMH6, Q9DCD0, Q8BVI4, Q9JII6, P52019, Q64105, Q00612, Q61093, P62482, O88844, P45376, Q9Z110, P48758, O70503                                                                                                                                                                                                                                                         | 3.79502196193265 | 1.37955572979904E-05 |

**Annotation Cluster 7** Enrichment Score: 6.272864013280407

|          |      |       |        |       |                 |     |
|----------|------|-------|--------|-------|-----------------|-----|
| Category | Term | Count | PValue | Genes | Fold Enrichment | FDR |
|----------|------|-------|--------|-------|-----------------|-----|

|             |                 |    |                      |                                                                                                                                                                                                                                                                                                                                                                                                                                                                                                                                                                                                                                |                  |                      |
|-------------|-----------------|----|----------------------|--------------------------------------------------------------------------------------------------------------------------------------------------------------------------------------------------------------------------------------------------------------------------------------------------------------------------------------------------------------------------------------------------------------------------------------------------------------------------------------------------------------------------------------------------------------------------------------------------------------------------------|------------------|----------------------|
| UP_KEYWORDS | Mitochondrion   | 76 | 4.59025732476503E-12 | Q9D964, P11928, Q9R0X4, Q8BH95, Q8JZR0, Q9D6U8, Q9CR62, P38647, Q8VDK1, Q9D880, Q9WTP6, Q9DCN2, O35129, P36552, P63087, Q05921, Q8BGH2, P48962, P56480, P41216, Q8R1I1, Q60597, Q99LX0, Q8BH86, Q9CPV4, Q03265, P19783, Q9JIK9, Q8BMF4, P67778, Q9CYG7, P32020, Q9CZU6, Q8BMS1, Q8BP40, Q8QZT1, Q9D6K5, P51881, Q811U4, Q78IK2, P56135, P99029, Q9CPQ3, Q9CPQ1, Q62465, Q3TL44, Q9CZD3, P09671, Q9QYR9, P00405, Q9EPB4, Q9CXT8, Q9JM90, Q8CGK3, P62908, Q6PB66, Q9CQN1, P28352, Q60931, Q9CQN6, P51174, Q14C51, Q6P3A8, Q8WTY4, Q9WUM5, Q9D172, P59017, P20108, P16332, P38060, Q78IK4, Q9Z110, P63038, Q9JK81, P29758, O35658 | 2.38533989100682 | 1.34137519601467E-10 |
| UP_KEYWORDS | Transit peptide | 37 | 2.2336412207831E-06  | Q9D964, Q9R0X4, Q8BH95, P99029, P38647, Q9D880, Q3TL44, P36552, P09671, Q9QYR9, Q9CXT8, P56480, Q8CGK3, Q60597, Q6PB66, Q9CQN1, P51174, Q8BH86, Q14C51, Q6P3A8, Q03265, Q9WUM5, P19783, Q9D172, Q8BMF4, P20108, P16332, P38060, Q78IK4, Q9CZU6, P29758, P63038, Q9JK81, Q8BMS1, Q8BP40, O35658, Q8QZT1                                                                                                                                                                                                                                                                                                                         | 2.40909482387391 | 2.02568152091709E-05 |

|                                                                 |                                 |       |                      |                                                                                                                                                                                                                                                                                                        |                  |                      |
|-----------------------------------------------------------------|---------------------------------|-------|----------------------|--------------------------------------------------------------------------------------------------------------------------------------------------------------------------------------------------------------------------------------------------------------------------------------------------------|------------------|----------------------|
| GOTERM_CC_DIRECT                                                | GO:0005759~mitochondrial matrix | 19    | 7.72778301956294E-05 | Q60597, P62908, Q9CQN1, Q99LX0, Q8BH95, P51174, Q9WUM5, P35700, P16332, Q9CZN7, Q9QYR9, P38060, Q9CXT8, Q9CZU6, P29758, P63038, O35658, Q8QZT1, Q8CGK3                                                                                                                                                 | 2.97027955347772 | 0.001008788972554    |
| UP_SEQ_FEATURE                                                  | transit peptide:Mitochondrion   | 37    | 0.000102244176038    | Q9D964, Q9R0X4, Q8BH95, P99029, Q921F4, P38647, Q9D880, Q3TL44, P36552, P09671, Q9QYR9, Q9CXT8, P56480, Q8CGK3, Q60597, Q6PB66, Q9CQN1, P51174, Q8BH86, Q14C51, Q6P3A8, Q03265, Q9WUM5, P19783, Q9D172, Q8BMF4, P20108, P16332, P38060, Q9CZU6, P29758, P63038, Q9JK81, Q8BMS1, O35658, Q8QZT1, Q9D6K5 | 2.00842615362361 | 0.049179448674241    |
| <b>Annotation Cluster 8</b> Enrichment Score: 6.165766723021288 |                                 |       |                      |                                                                                                                                                                                                                                                                                                        |                  |                      |
| Category                                                        | Term                            | Count | PValue               | Genes                                                                                                                                                                                                                                                                                                  | Fold Enrichment  | FDR                  |
| UP_KEYWORDS                                                     | Spliceosome                     | 21    | 3.06737202152557E-10 | Q9CSN1, Q99NB9, Q8JZX4, P61979, P62309, Q8BTI8, Q6PDM2, O35691, Q64012, Q6PE01, O08583, P16110, Q99KP6, P83870, O88569, Q922U1, P62305, P62317, P62307, O35737, Q8CCF0                                                                                                                                 | 5.96013064534294 | 5.37812561107483E-09 |
| UP_KEYWORDS                                                     | mRNA splicing                   | 28    | 4.39847371952314E-09 | Q99NB9, Q8JZX4, Q8BTI8, O35691, Q9JKP5, Q9DAR7, Q8VIJ6, Q99KP6, P83870, P62317, Q9CSN1, P61979, P62309, Q6PDM2, O35286, Q64012, Q6PE01, P17225, P16110, O08583, Q3U0V1, O88569, Q922U1, P62305, P62307, O35737, Q8CCF0, O35658                                                                         | 3.87408491947291 | 6.42665882352547E-08 |

|                  |                                         |    |                      |                                                                                                                                                                                                                                        |                  |                      |
|------------------|-----------------------------------------|----|----------------------|----------------------------------------------------------------------------------------------------------------------------------------------------------------------------------------------------------------------------------------|------------------|----------------------|
| GOTERM_CC_DIRECT | GO:0005681~spliceosomal complex         | 21 | 3.4997401111078E-08  | Q9CSN1, Q99NB9, Q8JZX4, P61979, Q8BTI8, Q6PDM2, O35286, O35691, Q64012, Q6PE01, O08583, P16110, Q99KP6, P83870, O88569, Q922U1, P62305, P62317, P62307, O35737, Q8CCF0                                                                 | 4.53818253758903 | 8.45187236832533E-07 |
| UP_KEYWORDS      | mRNA processing                         | 29 | 2.14786621573615E-07 | Q99NB9, Q8JZX4, Q8BTI8, O35691, Q9JKP5, Q9DAR7, Q8VIJ6, Q99KP6, P83870, P62317, Q9DBR1, Q9CSN1, P61979, P62309, Q6PDM2, O35286, Q64012, Q6PE01, P17225, P16110, O08583, Q3U0V1, O88569, Q922U1, P62305, P62307, O35737, Q8CCF0, O35658 | 3.13676489524563 | 2.25955525895443E-06 |
| GOTERM_BP_DIRECT | GO:0008380~RNA splicing                 | 27 | 7.64473833071557E-07 | Q99NB9, Q8JZX4, Q8BTI8, O35691, Q9JKP5, Q9DAR7, Q8VIJ6, Q99KP6, P83870, P62317, Q9CSN1, P61979, Q6PDM2, O35286, Q64012, Q6PE01, P17225, P16110, O08583, Q3U0V1, O88569, Q922U1, P62305, P62307, O35737, Q8CCF0, O35658                 | 3.07869944128441 | 0.000191604941616    |
| GOTERM_CC_DIRECT | GO:0071013~catalytic step 2 spliceosome | 16 | 8.09129785892731E-07 | Q9CSN1, Q99NB9, P61979, P62309, Q8BTI8, Q6PDM2, O35691, Q64012, Q6PE01, Q99KP6, P83870, O88569, P62305, P62317, P62307, O35737                                                                                                         | 4.898355754858   | 1.50311417917765E-05 |

|                                                          |                            |       |                      |                                                                                                                                                                                                                                                                |                  |                   |
|----------------------------------------------------------|----------------------------|-------|----------------------|----------------------------------------------------------------------------------------------------------------------------------------------------------------------------------------------------------------------------------------------------------------|------------------|-------------------|
| GOTERM_BP_DIRECT                                         | GO:0006397~mRNA processing | 32    | 8.39246876744904E-07 | Q99NB9, Q8JZX4, Q8BTI8, Q921F4, O35691, Q9JKP5, Q9DAR7, Q8VIJ6, Q99KP6, P83870, Q05921, P60335, P62317, Q6NS46, Q9DBR1, Q9CSN1, P61979, Q6PDM2, O35286, Q64012, Q6PE01, P17225, P16110, O08583, Q3U0V1, O88569, Q922U1, P62305, P62307, O35737, Q8CCF0, O35658 | 2.73095584209632 | 0.000192816969932 |
| KEGG_PATHWAY                                             | mmu03040:Spliceosome       | 18    | 0.00080170833149     | Q9CSN1, Q99NB9, Q8JZX4, P61979, P62309, Q6PDM2, O35286, Q6PE01, O08583, Q99KP6, P83870, Q922U1, P62305, Q810A7, P60335, P62317, P62307, Q8CCF0                                                                                                                 | 2.49016080872037 | 0.010555826364615 |
| Annotation Cluster 9 Enrichment Score: 6.142197552205322 |                            |       |                      |                                                                                                                                                                                                                                                                |                  |                   |
| Category                                                 | Term                       | Count | PValue               | Genes                                                                                                                                                                                                                                                          | Fold Enrichment  | FDR               |

|             |                    |     |                      |                                                                                                                                                                                                                                                                                                                                                                                                                                                                                                                                                                                                                                                                                                                                                                                                                                                                                                                                                                     |                  |                     |
|-------------|--------------------|-----|----------------------|---------------------------------------------------------------------------------------------------------------------------------------------------------------------------------------------------------------------------------------------------------------------------------------------------------------------------------------------------------------------------------------------------------------------------------------------------------------------------------------------------------------------------------------------------------------------------------------------------------------------------------------------------------------------------------------------------------------------------------------------------------------------------------------------------------------------------------------------------------------------------------------------------------------------------------------------------------------------|------------------|---------------------|
|             |                    |     |                      | P07901, Q9CW03, O70133,<br>P55264, P38647, Q922B2, P68181,<br>Q61036, Q9WTP6, Q8VEH3,<br>P16460, P61021, P61028, Q9JJZ4,<br>P56480, Q9DBC7, P58389,<br>Q03265, P10126, Q64430, P84096,<br>O55143, Q6PCN7, Q8K183,<br>Q811U4, Q80X41, Q5SUR0,<br>Q9DCL9, P61161, Q8VDD5,<br>Q9JKR6, Q9CZD3, Q8BMJ2,<br>P26638, Q8CGK3, Q61820,<br>Q60855, P68372, Q9WUM5,<br>P61211, Q61390, Q04447, P60766,<br>Q3UFY7, P11928, B2RQC6,<br>Q922F4, Q8JZR0, Q9Z277,<br>Q61879, O70172, Q9DBP5,<br>B2RX12, P63001, Q9QWT9,<br>P63085, Q9JHR7, Q9Z1F9,<br>Q05921, Q810A7, P31938, P52480,<br>P41216, P28650, P70296, P68033,<br>O35286, P11499, P35293, P42932,<br>Q8R050, Q68FH4, P09581,<br>Q6Q899, P00493, Q501J6, O08528,<br>P59325, Q9CU62, Q9JM14,<br>P62331, P49717, Q3TL44, P68037,<br>Q04899, P35285, Q9D6F9, O54988,<br>G5E829, Q99KH8, P60710,<br>Q62159, P80315, Q9CQN1,<br>Q60931, P63280, Q9EQP2,<br>P51859, P08113, Q9Z110,<br>Q9WUA3, P63038, P08752,<br>P60843, P80317 |                  |                     |
| UP_KEYWORDS | Nucleotide-binding | 105 | 1.54867158953322E-11 |                                                                                                                                                                                                                                                                                                                                                                                                                                                                                                                                                                                                                                                                                                                                                                                                                                                                                                                                                                     | 1.98784288912521 | 3.7027329822476E-10 |

|                                                |     |                      |                 |                                                                                                                                                                                                                                                                                                                                                                                                                                                                                                                                                                                                                                                                                                                                                                                                                                                                                                                                                                                                                                                                                                                                                            |  |  |
|------------------------------------------------|-----|----------------------|-----------------|------------------------------------------------------------------------------------------------------------------------------------------------------------------------------------------------------------------------------------------------------------------------------------------------------------------------------------------------------------------------------------------------------------------------------------------------------------------------------------------------------------------------------------------------------------------------------------------------------------------------------------------------------------------------------------------------------------------------------------------------------------------------------------------------------------------------------------------------------------------------------------------------------------------------------------------------------------------------------------------------------------------------------------------------------------------------------------------------------------------------------------------------------------|--|--|
|                                                |     |                      |                 | P07901, P52431, Q9CW03,<br>O70133, P55264, P38647, Q922B2,<br>P68181, Q61036, Q9WTP6,<br>P62751, Q8VEH3, P16460, P61021,<br>P61028, Q9JJZ4, P56480, Q9DBC7,<br>P58389, Q03265, P10126, Q64430,<br>P84096, O55143, Q6PCN7,<br>O88569, Q8K183, Q9CX86,<br>Q811U4, Q921F4, Q80X41,<br>Q5SUR0, Q9DCL9, P61161,<br>Q8VDD5, Q9JKR6, Q9CZD3,<br>Q8BMJ2, P26638, Q8CGK3,<br>O89086, Q61545, Q61820, Q60855,<br>Q3THG9, P68372, Q9WUM5,<br>Q64012, P61211, O08583,<br>Q8C2Q3, Q61390, Q04447,<br>P60766, Q3UFY7, B2RQC6,<br>Q922F4, Q8JZR0, Q9Z277,<br>Q60668, Q61879, O70172, P32067,<br>P56959, Q9DBP5, B2RX12,<br>P63001, P63085, Q9JHR7, Q9Z1F9,<br>Q05921, Q810A7, P31938, P52480,<br>P41216, P28650, P62849, P70296,<br>P68033, Q6PDM2, O35286,<br>P11499, P70333, P35293, P42932,<br>Q8R050, Q68FH4, P09581,<br>Q6Q899, P00493, Q8JZX4,<br>Q9CY64, Q501J6, O08528, P59325,<br>Q9CU62, Q9JM14, P62331,<br>P49717, Q8VIJ6, Q5SF07, Q3TL44,<br>P68037, Q04899, P35285, Q9D6F9,<br>O54988, G5E829, Q99KH8,<br>P60710, Q62159, P80315,<br>Q9CQN1, Q60931, P63280,<br>Q9EQP2, P17225, P51859, P08113,<br>Q9Z110, Q9WUA3, O35737,<br>P63038, P08752, P60843, P80317 |  |  |
| GOTERM_MF_DIRECT GO:0000166~nucleotide binding | 126 | 2.79720723520736E-10 | 1.7522095959596 | 4.57343382956403E-08                                                                                                                                                                                                                                                                                                                                                                                                                                                                                                                                                                                                                                                                                                                                                                                                                                                                                                                                                                                                                                                                                                                                       |  |  |

|             |             |    |                      |                                                                                                                                                                                                                                                                                                                                                                                                                                                                                                                                                                                                                                                                                                          |                  |                      |
|-------------|-------------|----|----------------------|----------------------------------------------------------------------------------------------------------------------------------------------------------------------------------------------------------------------------------------------------------------------------------------------------------------------------------------------------------------------------------------------------------------------------------------------------------------------------------------------------------------------------------------------------------------------------------------------------------------------------------------------------------------------------------------------------------|------------------|----------------------|
|             |             |    |                      | P07901, P11928, Q9CW03,<br>B2RQC6, O70133, Q8JZR0,<br>Q9Z277, Q61879, P55264, O70172,<br>P38647, Q922B2, P68181, Q61036,<br>Q9WTP6, Q9DBP5, B2RX12,<br>Q9QWT9, P63085, Q9JHR7,<br>P16460, Q9Z1F9, Q05921, Q810A7,<br>P31938, P52480, Q9JJZ4, P56480,<br>P41216, P70296, P68033, P58389,<br>O35286, P11499, Q03265, Q64430,<br>P42932, O55143, Q68FH4, P09581,<br>Q6PCN7, Q8K183, Q6Q899,<br>Q80X41, Q501J6, O08528,<br>Q9CU62, Q5SUR0, Q9DCL9,<br>P61161, P49717, Q8VDD5,<br>Q9JKR6, P68037, Q3TL44,<br>Q9CZD3, Q8BMJ2, Q04899,<br>O54988, P26638, G5E829,<br>Q99KH8, Q8CGK3, P60710,<br>P80315, Q9CQN1, Q60855,<br>P63280, Q9EQP2, Q61390,<br>Q04447, P08113, Q9Z110, P63038,<br>Q9WUA3, P80317, P60843 |                  |                      |
| UP_KEYWORDS | ATP-binding | 77 | 1.48283301634006E-07 |                                                                                                                                                                                                                                                                                                                                                                                                                                                                                                                                                                                                                                                                                                          | 1.87593253620845 | 1.62493784707265E-06 |



|                  |                                         |    |                   |                                                                                                                                                                                                                                                                                                                                                                                                                                                                                                                                                                                                                                                                                                                                     |                  |                   |
|------------------|-----------------------------------------|----|-------------------|-------------------------------------------------------------------------------------------------------------------------------------------------------------------------------------------------------------------------------------------------------------------------------------------------------------------------------------------------------------------------------------------------------------------------------------------------------------------------------------------------------------------------------------------------------------------------------------------------------------------------------------------------------------------------------------------------------------------------------------|------------------|-------------------|
|                  |                                         |    |                   | P07901, P11928, Q9CW03,<br>B2RQC6, O70133, Q8JZR0,<br>Q9Z277, Q61879, Q9Z0P5, P55264,<br>O70172, P38647, Q922B2, P68181,<br>Q61036, Q9WTP6, Q9DBP5,<br>B2RX12, Q9QWT9, P63085,<br>Q9JHR7, P16460, Q9Z1F9,<br>Q05921, Q810A7, P31938, P52480,<br>Q9JJZ4, P56480, P41216, P70296,<br>P68033, P58389, O35286, P11499,<br>Q03265, Q64430, P42932, O55143,<br>Q68FH4, P09581, Q6PCN7,<br>Q8K183, Q6Q899, Q80X41,<br>Q501J6, O08528, Q9CU62,<br>Q5SUR0, Q9DCL9, P61161,<br>P49717, Q8VDD5, Q9JKR6,<br>P68037, Q3TL44, Q9CZD3,<br>Q8BMJ2, Q04899, O54988,<br>P26638, G5E829, Q99KH8,<br>Q8CGK3, P60710, P80315,<br>Q9CQN1, Q8BH61, Q60855,<br>Q3THG9, P63280, Q9EQP2,<br>Q61390, Q04447, P08113, Q9Z110,<br>P63038, Q9WUA3, P80317, P60843 |                  |                   |
| GOTERM_MF_DIRECT | GO:0005524~ATP binding                  | 80 | 0.001027120190324 |                                                                                                                                                                                                                                                                                                                                                                                                                                                                                                                                                                                                                                                                                                                                     | 1.42921510318104 | 0.029635438432579 |
|                  |                                         |    |                   | Q9CW03, O70133, Q61879,<br>Q80X41, Q501J6, Q9CU62,<br>Q5SUR0, P68181, Q61036,<br>Q9WTP6, Q9DBP5, Q9QWT9,<br>P61161, P49717, Q8VDD5,<br>Q3TL44, P63085, Q9CZD3,<br>P16460, Q04899, Q9Z1F9, Q810A7,<br>O54988, P31938, P26638, Q99KH8,<br>P56480, Q8CGK3, Q60855,<br>O35286, Q03265, Q9EQP2,<br>Q68FH4, Q04447, Q6PCN7,<br>P09581, Q8K183, Q6Q899,<br>Q9WUA3, P60843                                                                                                                                                                                                                                                                                                                                                                  |                  |                   |
| UP_SEQ_FEATURE   | nucleotide phosphate-binding region:ATP | 40 | 0.294859246329712 |                                                                                                                                                                                                                                                                                                                                                                                                                                                                                                                                                                                                                                                                                                                                     | 1.1183288397152  | 0.998961578400831 |

**Annotation Cluster 10** Enrichment Score: 5.7152123414759926

| Category         | Term                              | Count | PValue               | Genes                                                                                                                                                  | Fold Enrichment  | FDR                  |
|------------------|-----------------------------------|-------|----------------------|--------------------------------------------------------------------------------------------------------------------------------------------------------|------------------|----------------------|
| UP_KEYWORDS      | Redox-active center               | 14    | 8.05373772455301E-10 | P27773, O08709, O08807, Q9CQM5, P99029, Q9JMH6, Q9ESY9, Q8R180, P35700, P20108, P08003, P09103, Q8VBT0, Q922R8                                         | 9.89128064546276 | 1.3238331384734E-08  |
| GOTERM_BP_DIRECT | GO:0045454~cell redox homeostasis | 15    | 6.68826112118315E-08 | P27773, O08709, P28352, O08807, P99029, Q9JMH6, Q8BZW8, Q8R180, P35700, P20108, P08003, P09103, Q8VBT0, Q91VW3, Q922R8                                 | 6.34159457563713 | 2.04883732345577E-05 |
| INTERPRO         | IPR013766:Thioredoxin domain      | 11    | 4.41513040257316E-07 | P27773, P20108, O08709, O08807, P99029, P08003, P09103, Q8VBT0, Q8BZW8, Q922R8, P35700                                                                 | 8.42760416666667 | 0.000296205197614    |
| INTERPRO         | IPR012336:Thioredoxin-like fold   | 19    | 4.61020075691933E-07 | P27773, P10649, O08709, O08807, Q9CQM5, Q9Z1Q5, P99029, Q9JHF7, Q8BZW8, P35700, Q99L20, P20108, Q9JJU8, P08003, P09103, Q8VBT0, O09131, Q91VW3, Q922R8 | 4.28140318627451 | 0.000296205197614    |
| GOTERM_CC_DIRECT | GO:0005623~cell                   | 16    | 0.012793976700128    | P27773, O08709, O08807, P99029, Q9Z0P5, Q9JMH6, O08528, P29391, P30681, Q9CPQ3, Q8BZW8, P35700, O55143, P09103, Q8VBT0, Q922R8                         | 2.03568031370722 | 0.066446137055502    |

**Annotation Cluster 11** Enrichment Score: 4.905648953988063

| Category | Term | Count | PValue | Genes | Fold Enrichment | FDR |
|----------|------|-------|--------|-------|-----------------|-----|
|----------|------|-------|--------|-------|-----------------|-----|

|                  |                              |    |                      |                                                                                                                                                                                                                                                                                                                                                                                |                  |                     |
|------------------|------------------------------|----|----------------------|--------------------------------------------------------------------------------------------------------------------------------------------------------------------------------------------------------------------------------------------------------------------------------------------------------------------------------------------------------------------------------|------------------|---------------------|
| UP_KEYWORDS      | Protein transport            | 45 | 1.83903272880863E-08 | Q9EPK6, Q9WU78, P98078, P61924, Q8C2E7, Q9D8U8, Q9ER00, O70492, P70168, Q6P5F9, Q9CPQ3, Q9D662, Q9D880, Q6P8X1, P62331, P63024, O35643, Q01405, O35344, Q80XQ2, P35285, P61021, O35609, P61028, Q9D0F3, Q9D4H1, Q99PL5, Q91V04, Q61820, Q9CT10, Q8R0H9, Q8VDV3, P70670, Q61187, Q9D2V7, Q60770, Q9QZ88, P35293, Q9CWK8, O88746, P57780, P52293, P61971, O70404, O88384         | 2.58975718806063 | 2.3031695603651E-07 |
| GOTERM_BP_DIRECT | GO:0015031~protein transport | 46 | 2.60176315029035E-06 | P50396, Q9EPK6, Q9WU78, P98078, P61924, Q8C2E7, Q9D8U8, Q9ER00, O70492, P70168, Q6P5F9, Q9CPQ3, Q9D662, Q9D880, Q6P8X1, P62331, P63024, O35643, Q8VDD5, Q01405, O35344, Q80XQ2, P35285, P61021, O35609, P61028, Q9D0F3, Q9D4H1, O88531, Q99PL5, Q91V04, Q61820, Q9CT10, Q8R0H9, Q8VDV3, P70670, Q61187, Q9D2V7, Q60770, Q9QZ88, P35293, Q9CWK8, O88746, P57780, O70404, O88384 | 2.13528916454448 | 0.000478204067023   |

|             |           |    |                     |                                                                                                                                                                                                                                                                                                                                                                                                                                                                                                                                                                                                                                                                                                                                |                  |                   |
|-------------|-----------|----|---------------------|--------------------------------------------------------------------------------------------------------------------------------------------------------------------------------------------------------------------------------------------------------------------------------------------------------------------------------------------------------------------------------------------------------------------------------------------------------------------------------------------------------------------------------------------------------------------------------------------------------------------------------------------------------------------------------------------------------------------------------|------------------|-------------------|
| UP_KEYWORDS | Transport | 88 | 5.2812100515102E-05 | P98078, Q9D8U8, Q9CR62, Q9ER00, O70492, Q6P5F9, P51863, O08788, Q3U7R1, Q62048, Q9D880, Q6P8X1, B2RX12, O35643, Q01405, Q9DC16, P61021, P61028, O35609, Q9DC50, Q9D4H1, P48962, P56480, Q8R1I1, Q99PL5, Q9CT10, Q8VDV3, Q62418, Q6PDM2, Q9CR51, Q03265, Q64430, Q99MR3, P53811, O08997, Q8R180, Q9DBG5, P35293, Q9CWK8, O55143, P57780, Q61093, P32020, P62482, O88569, P52293, O70404, P51881, Q9EPK6, Q9WU78, P61924, Q8C2E7, P56135, P70168, Q9CPQ3, Q9D662, P53986, P63024, P62331, O35344, Q5SF07, Q80XQ2, P50518, P35285, P00405, Q9D0F3, G5E829, Q9WU81, Q6PB66, Q8CIZ9, Q91V04, Q61820, Q60931, Q8R0H9, Q9Z1Q5, P70670, Q9D2V7, Q61187, Q60770, Q9QZ88, O08583, O88746, Q3U0V1, B9EJ86, Q8VBT0, P24668, P61971, O88384 | 1.53717354586436 | 0.000396845212442 |
|-------------|-----------|----|---------------------|--------------------------------------------------------------------------------------------------------------------------------------------------------------------------------------------------------------------------------------------------------------------------------------------------------------------------------------------------------------------------------------------------------------------------------------------------------------------------------------------------------------------------------------------------------------------------------------------------------------------------------------------------------------------------------------------------------------------------------|------------------|-------------------|

**Annotation Cluster 12** Enrichment Score: 4.691157205682

| Category         | Term                                      | Count | PValue               | Genes                                                                                                                                                                                                                                                  | Fold Enrichment  | FDR                  |
|------------------|-------------------------------------------|-------|----------------------|--------------------------------------------------------------------------------------------------------------------------------------------------------------------------------------------------------------------------------------------------------|------------------|----------------------|
| GOTERM_BP_DIRECT | GO:0005975~carbohydrate metabolic process | 31    | 8.70903739332816E-11 | Q7TSV4, P20060, Q9DCD0, P51569, O08528, Q9CPU0, P70665, Q93092, O54782, O88958, Q9QWR8, Q00612, Q6ZQI3, Q8BHN3, P23780, P06745, Q8CI94, P48441, Q8VDL4, Q8K2I4, P17439, Q8BMF4, P12265, O09159, P14152, P62141, P06151, Q8CHP8, Q9CZU6, Q91W89, P29416 | 4.13537639802874 | 4.00180268223429E-08 |

|                  |                                                                 |    |                      |                                                                                                                                                                                        |                  |                      |
|------------------|-----------------------------------------------------------------|----|----------------------|----------------------------------------------------------------------------------------------------------------------------------------------------------------------------------------|------------------|----------------------|
| UP_KEYWORDS      | Glycosidase                                                     | 16 | 3.26209419155019E-08 | P23780, P08905, P20060, P48441, P51569, Q8K2I4, P17439, P12265, O09159, O54782, Q80UM7, Q9QWR8, P58242, P29416, Q91W89, Q8BHN3                                                         | 6.25062440788907 | 3.89968532898955E-07 |
| GOTERM_MF_DIRECT | GO:0004553~hydrolase activity, hydrolyzing O-glycosyl compounds | 12 | 8.09413410679671E-08 | O09159, O54782, P23780, Q9QWR8, P20060, P48441, P51569, Q8K2I4, Q91W89, P29416, P12265, Q8BHN3                                                                                         | 8.50194931773879 | 7.94034555876757E-06 |
| GOTERM_MF_DIRECT | GO:0016798~hydrolase activity, acting on glycosyl bonds         | 16 | 1.46782698249589E-07 | P23780, P08905, P20060, P48441, P51569, Q8K2I4, P17439, P12265, O09159, O54782, Q80UM7, Q9QWR8, P58242, P29416, Q91W89, Q8BHN3                                                         | 5.52263374485597 | 1.19994855819039E-05 |
| UP_SEQ_FEATURE   | active site:Proton donor                                        | 23 | 8.06202178233286E-06 | P23780, P06745, P20060, Q8VCT3, P48441, P51569, Q80W54, Q8K2I4, Q9JII6, P17439, P12265, P54822, P36552, Q9QWR8, P62141, P63087, P63328, P45376, P17182, P29416, Q8BP40, Q8BHN3, Q3UFY7 | 3.02071530132342 | 0.007755664954604    |
| KEGG_PATHWAY     | mmu00511:Other glycan degradation                               | 8  | 2.47408093657801E-05 | O09159, O54782, P23780, P20060, Q8K2I4, P17439, Q91W89, P29416                                                                                                                         | 8.17756512493355 | 0.000651507979966    |
| KEGG_PATHWAY     | mmu00531:Glycosaminoglycan degradation                          | 8  | 7.84163994165305E-05 | Q571E4, Q8BFR4, P23780, P50429, P20060, P48441, P29416, P12265                                                                                                                         | 7.00934153565733 | 0.001858468666172    |
| INTERPRO         | IPR017853:Glycoside hydrolase, superfamily                      | 10 | 8.7114481131456E-05  | P23780, Q9QWR8, P20060, P48441, P51569, Q8K2I4, P17439, P29416, P12265, Q8BHN3                                                                                                         | 5.37646198830409 | 0.031426549068173    |

**Annotation Cluster 13** Enrichment Score: 4.5856942876524345

| Category         | Term                                         | Count | PValue               | Genes                                                          | Fold Enrichment  | FDR                  |
|------------------|----------------------------------------------|-------|----------------------|----------------------------------------------------------------|------------------|----------------------|
| GOTERM_BP_DIRECT | GO:0051693~actin filament capping            | 8     | 1.81633611951342E-06 | P13020, P24452, Q8VDD5, P47753, Q62261, P47754, P47757, P16546 | 12.2134414049308 | 0.00035768847725     |
| UP_KEYWORDS      | Actin capping                                | 7     | 6.74206601508248E-06 | P13020, P24452, P47753, Q62261, P47754, P47757, P16546         | 13.6732408922573 | 5.91054453988897E-05 |
| GOTERM_BP_DIRECT | GO:0051016~barbed-end actin filament capping | 7     | 1.31845834187184E-05 | P13020, P24452, Q9Z0P5, Q62418, P47753, P47754, P47757         | 12.0226063829787 | 0.002184525827756    |

| GOTERM_CC_DIRECT                                                 | GO:0008290~F-actin capping protein complex                                    | 4     | 0.002812983709333    | P47753, P47754, P47757, P62774                                                                                         | 13.0622820129547 | 0.017877251731681    |
|------------------------------------------------------------------|-------------------------------------------------------------------------------|-------|----------------------|------------------------------------------------------------------------------------------------------------------------|------------------|----------------------|
| <b>Annotation Cluster 14</b> Enrichment Score: 3.914066305663755 |                                                                               |       |                      |                                                                                                                        |                  |                      |
| Category                                                         | Term                                                                          | Count | PValue               | Genes                                                                                                                  | Fold Enrichment  | FDR                  |
| INTERPRO                                                         | IPR013766:Thioredoxin domain                                                  | 11    | 4.41513040257316E-07 | P27773, P20108, O08709, O08807, P99029, P08003, P09103, Q8VBT0, Q8BZW8, Q922R8, P35700                                 | 8.42760416666667 | 0.000296205197614    |
| GOTERM_MF_DIRECT                                                 | GO:0051920~peroxiredoxin activity                                             | 6     | 1.49083398402693E-05 | P20108, O08709, O08807, Q99LX0, P99029, P35700                                                                         | 16.1537037037037 | 0.0008602989049      |
| UP_KEYWORDS                                                      | Peroxidase                                                                    | 7     | 3.57439860805704E-05 | P20108, P22437, O08709, O08807, P24270, P99029, P35700                                                                 | 10.565686144017  | 0.00027649024527     |
| UP_KEYWORDS                                                      | Antioxidant                                                                   | 6     | 5.66238627812033E-05 | P20108, P08228, O08709, O08807, P99029, P35700                                                                         | 13.2825768667643 | 0.000413668775318    |
| UP_SEQ_FEATURE                                                   | active site:Cysteine sulfenic acid (-SOH) intermediate                        | 5     | 6.00068577930158E-05 | P20108, O08709, O08807, P99029, P35700                                                                                 | 19.2312620115311 | 0.038484398131254    |
| GOTERM_BP_DIRECT                                                 | GO:0042744~hydrogen peroxide catabolic process                                | 6     | 9.50174591800331E-05 | P20108, O08709, P24270, P99029, Q9JMH6, P35700                                                                         | 11.7772470690404 | 0.010478525398374    |
| GOTERM_MF_DIRECT                                                 | GO:0004601~peroxidase activity                                                | 8     | 0.00011285302676     | P20108, P22437, O08709, O08807, P24270, Q9CQM5, P99029, P35700                                                         | 6.94782954998009 | 0.004813426923994    |
| GOTERM_MF_DIRECT                                                 | GO:0016209~antioxidant activity                                               | 7     | 0.000193075381498    | P20108, P08228, O08709, O08807, P24270, P99029, P35700                                                                 | 7.85249485596708 | 0.007576277969975    |
| INTERPRO                                                         | IPR019479:Peroxiredoxin, C-terminal                                           | 4     | 0.000639815767172    | P20108, O08709, O08807, P35700                                                                                         | 20.4305555555556 | 0.083932195638973    |
| INTERPRO                                                         | IPR000866:Alkyl hydroperoxide reductase subunit C/ Thiol specific antioxidant | 4     | 0.001092568191176    | P20108, O08709, O08807, P35700                                                                                         | 17.5119047619048 | 0.103204087847055    |
| <b>Annotation Cluster 15</b> Enrichment Score: 3.814452000898943 |                                                                               |       |                      |                                                                                                                        |                  |                      |
| Category                                                         | Term                                                                          | Count | PValue               | Genes                                                                                                                  | Fold Enrichment  | FDR                  |
| GOTERM_BP_DIRECT                                                 | GO:0051603~proteolysis involved in cellular protein catabolic process         | 15    | 1.10392272473365E-08 | P10605, O70435, P99026, P70195, O08529, O70370, P97821, Q920A5, Q9R1P4, Q9R1P3, Q9WUU7, P16675, Q9JHR7, O89017, Q8CGK3 | 7.23164293713006 | 4.34787850298668E-06 |

|                  |                               |    |                   |                                                                                                                                                                                                                                                                                        |                  |                   |
|------------------|-------------------------------|----|-------------------|----------------------------------------------------------------------------------------------------------------------------------------------------------------------------------------------------------------------------------------------------------------------------------------|------------------|-------------------|
| UP_KEYWORDS      | Protease                      | 32 | 0.000525737656081 | Q11136, O70435, P56399, P99026, Q9CXY9, O35593, P34960, O08529, O70370, P97821, P18242, Q9R1P4, Q9R1P3, Q99K23, Q9JHR7, Q9CXT8, Q9Z2W0, Q8CGK3, O89001, O89023, Q64514, P10605, Q99LX0, P70195, Q6NSR8, Q8VCT3, Q80W54, Q920A5, Q9WUU7, P16675, O89017, Q7TMR0                         | 1.96052795081392 | 0.003215558222078 |
| GOTERM_MF_DIRECT | GO:0008233~peptidase activity | 35 | 0.000891216029373 | P27773, Q11136, O70435, P56399, P99026, Q9CXY9, O35593, P34960, O08529, O70370, P97821, P18242, Q9R1P4, Q9R1P3, Q99K23, Q6ZWQ7, Q9JHR7, Q9CXT8, Q9Z2W0, Q8CGK3, O89001, O89023, Q64514, P10605, P57716, Q99LX0, P70195, Q6NSR8, Q8VCT3, Q80W54, Q920A5, Q9WUU7, P16675, O89017, Q7TMR0 | 1.82616159441095 | 0.026493421964082 |
| UP_KEYWORDS      | Zymogen                       | 16 | 0.002049034876484 | P10605, P23780, Q8BH61, P99026, Q99LX0, P70195, P34960, O70370, P97821, P18242, Q9WUU7, P16675, O89017, Q7TMR0, P29416, O89023                                                                                                                                                         | 2.4943806322562  | 0.010015147180821 |
| GOTERM_BP_DIRECT | GO:0006508~proteolysis        | 34 | 0.007989137534611 | Q11136, O70435, P56399, P99026, Q9CXY9, O35593, P34960, O08529, O70370, P97821, P18242, Q9R1P4, Q9R1P3, Q99K23, Q6ZWQ7, Q9JHR7, Q9CXT8, Q9Z2W0, Q8CGK3, O89001, O89023, Q64514, P10605, Q9CX56, Q99LX0, P70195, Q6NSR8, Q8VCT3, Q80W54, Q920A5, Q9WUU7, P16675, O89017, Q7TMR0         | 1.60537503002956 | 0.310226087083418 |

**Annotation Cluster 16** Enrichment Score: 3.545308532416807

| Category         | Term                                              | Count | PValue               | Genes                                                   | Fold Enrichment  | FDR               |
|------------------|---------------------------------------------------|-------|----------------------|---------------------------------------------------------|------------------|-------------------|
| GOTERM_BP_DIRECT | GO:0006164~purine nucleotide biosynthetic process | 7     | 5.63456530307712E-05 | Q9CWWJ9, P00493, P11928, P28650, Q5SUR0, P54822, Q9DCL9 | 9.61808510638298 | 0.00739737930504  |
| UP_KEYWORDS      | Purine biosynthesis                               | 5     | 0.000466564322483    | Q9CWWJ9, P28650, Q5SUR0, P54822, Q9DCL9                 | 12.7717085257349 | 0.002921581352693 |
| GOTERM_BP_DIRECT | GO:0006189~'de novo' IMP biosynthetic process     | 4     | 0.000879634917006    | Q9CWWJ9, Q5SUR0, P54822, Q9DCL9                         | 18.3201621073962 | 0.057741749194867 |

**Annotation Cluster 17** Enrichment Score: 3.460460715819797

| Category         | Term                                               | Count | PValue               | Genes                                                                                          | Fold Enrichment  | FDR                  |
|------------------|----------------------------------------------------|-------|----------------------|------------------------------------------------------------------------------------------------|------------------|----------------------|
| INTERPRO         | IPR013766:Thioredoxin domain                       | 11    | 4.41513040257316E-07 | P27773, P20108, O08709, O08807, P99029, P08003, P09103, Q8VBT0, Q8BZW8, Q922R8, P35700         | 8.42760416666667 | 0.000296205197614    |
| GOTERM_CC_DIRECT | GO:0005790~smooth endoplasmic reticulum            | 9     | 3.87986651946568E-06 | P27773, P14211, Q9JKR6, O08807, P24369, P08003, P08113, P35564, Q922R8                         | 9.12107623318386 | 6.46198458242044E-05 |
| GOTERM_CC_DIRECT | GO:0034663~endoplasmic reticulum chaperone complex | 6     | 2.89542023404383E-05 | Q9JKR6, P24369, P08003, P09103, P08113, Q922R8                                                 | 14.695067264574  | 0.000437027491576    |
| INTERPRO         | IPR005788:Disulphide isomerase                     | 4     | 0.000639815767172    | P27773, P08003, P09103, Q922R8                                                                 | 20.4305555555556 | 0.083932195638973    |
| GOTERM_MF_DIRECT | GO:0003756~protein disulfide isomerase activity    | 6     | 0.000673473631979    | P27773, P08003, P09103, Q8VBT0, Q922R8, Q8R180                                                 | 8.07685185185185 | 0.022781987343851    |
| GOTERM_CC_DIRECT | GO:0005788~endoplasmic reticulum lumen             | 12    | 0.000815209842803    | P27773, P14211, Q9EPK6, Q9JKR6, P08905, P24369, P08003, P09103, P08113, Q8K297, Q922R8, Q9DBS1 | 3.39116936874784 | 0.006907830773226    |

**Annotation Cluster 18** Enrichment Score: 3.2542349881549804

| Category | Term                                              | Count | PValue            | Genes                                  | Fold Enrichment  | FDR               |
|----------|---------------------------------------------------|-------|-------------------|----------------------------------------|------------------|-------------------|
| SMART    | SM00102:ADF                                       | 5     | 0.000171828436358 | Q9Z0P5, Q62418, Q9CQI6, P18760, Q9ERL7 | 15.8917682926829 | 0.042613452216732 |
| INTERPRO | IPR002108:Actin-binding, cofilin/tropomyosin type | 5     | 0.000200516155534 | Q9Z0P5, Q62418, Q9CQI6, P18760, Q9ERL7 | 15.3229166666667 | 0.041334973205176 |

**Annotation Cluster 19** Enrichment Score: 3.198537748986291

| Category | Term | Count | PValue | Genes | Fold Enrichment | FDR |
|----------|------|-------|--------|-------|-----------------|-----|
|----------|------|-------|--------|-------|-----------------|-----|



|                  |                                    |    |                      |                                                                                                                                                                                                                                                                                |                  |                   |
|------------------|------------------------------------|----|----------------------|--------------------------------------------------------------------------------------------------------------------------------------------------------------------------------------------------------------------------------------------------------------------------------|------------------|-------------------|
| UP_KEYWORDS      | Lipid metabolism                   | 29 | 7.08962305624729E-05 | P51660, Q9Z0J0, O08709, P19096, Q8JZR0, Q8BH95, Q8BYI6, Q9JHF7, Q8BLF1, Q9DCN2, P22437, Q8K2C9, P58044, P58242, Q924Z4, Q9DC50, P41216, Q8VEB4, Q9Z0M5, P51174, P17439, Q61263, Q9D6K9, Q8CIH5, Q3TCN2, O70503, Q8BMS1, Q8BP40, Q8BG07                                         | 2.30932091808252 | 0.000503938071295 |
| GOTERM_BP_DIRECT | GO:0006629~lipid metabolic process | 34 | 0.000160978360042    | P51660, Q9Z0J0, Q9WV54, O08709, P19096, Q8JZR0, Q8BH95, Q8BYI6, Q9JHF7, P53986, Q8BLF1, Q9DCN2, P22437, Q8K2C9, P58242, Q924Z4, Q9DC50, P56480, P41216, Q8VEB4, Q9Z0M5, Q61207, P51174, Q03265, P17439, Q61263, Q9D6K9, Q8CIH5, P38060, Q3TCN2, O70503, Q8BMS1, Q8BP40, Q8BG07 | 2.03557356748846 | 0.015850619237021 |
| UP_KEYWORDS      | Fatty acid metabolism              | 12 | 0.001311750192557    | P51660, P22437, Q8K2C9, Q8BH95, P19096, Q8JZR0, P51174, Q9DC50, Q9JHF7, Q8BMS1, P41216, Q8VEB4                                                                                                                                                                                 | 3.21352666131394 | 0.007113486216652 |
| KEGG_PATHWAY     | mmu01212:Fatty acid metabolism     | 10 | 0.001478650610093    | Q8K2C9, Q8BH95, P19096, Q8JZR0, P51174, O88531, O70503, Q8BMS1, P41216, Q8QZT1                                                                                                                                                                                                 | 3.60774931982362 | 0.017522009729601 |

**Annotation Cluster 20** Enrichment Score: 3.1326555888652114

| Category         | Term                          | Count | PValue               | Genes                                                                  | Fold Enrichment  | FDR                  |
|------------------|-------------------------------|-------|----------------------|------------------------------------------------------------------------|------------------|----------------------|
| UP_KEYWORDS      | Glycolysis                    | 9     | 7.35811897119128E-06 | Q60597, P06745, Q8VDL4, P05063, P52480, P05064, O08528, P17182, Q9WUA3 | 8.53879941434846 | 6.24253319168809E-05 |
| GOTERM_BP_DIRECT | GO:0006096~glycolytic process | 9     | 3.57378297498019E-05 | Q60597, P06745, Q8VDL4, P05063, P52480, P05064, O08528, P17182, Q9WUA3 | 6.87006079027356 | 0.005185747190537    |

|              |                                       |    |                   |                                                                                                        |                  |                   |
|--------------|---------------------------------------|----|-------------------|--------------------------------------------------------------------------------------------------------|------------------|-------------------|
| KEGG_PATHWAY | mmu00010:Glycolysis / Gluconeogenesis | 13 | 0.000187533369165 | P06745, Q7TSV4, Q8VDL4, O08528, Q9JII6, Q8BMF4, Q9JLJ2, P06151, P05063, P52480, P05064, P17182, Q9WUA3 | 3.62414818036828 | 0.003534988602134 |
|--------------|---------------------------------------|----|-------------------|--------------------------------------------------------------------------------------------------------|------------------|-------------------|

**Annotation Cluster 21** Enrichment Score: 2.8938082139705914

| Category         | Term                                                    | Count | PValue               | Genes                                          | Fold Enrichment  | FDR               |
|------------------|---------------------------------------------------------|-------|----------------------|------------------------------------------------|------------------|-------------------|
| GOTERM_BP_DIRECT | GO:0042554~superoxide anion generation                  | 6     | 2.40159822513707E-05 | Q8CIZ9, P08228, P09671, Q61093, O70145, Q09014 | 14.989223542415  | 0.003678447948168 |
| GOTERM_BP_DIRECT | GO:0006801~superoxide metabolic process                 | 6     | 0.00047448046668     | Q8CIZ9, P08228, P09671, Q61093, O70145, A2AAY5 | 8.67797152455607 | 0.032703566165926 |
| GOTERM_MF_DIRECT | GO:0016175~superoxide-generating NADPH oxidase activity | 4     | 0.002472439390293    | Q8CIZ9, Q61093, O70145, Q09014                 | 13.4614197530864 | 0.06382797478626  |

**Annotation Cluster 22** Enrichment Score: 2.7308178848835514

| Category    | Term        | Count | PValue               | Genes                                                                                                                                                                                                                                                                                                                                                                                                          | Fold Enrichment  | FDR                  |
|-------------|-------------|-------|----------------------|----------------------------------------------------------------------------------------------------------------------------------------------------------------------------------------------------------------------------------------------------------------------------------------------------------------------------------------------------------------------------------------------------------------|------------------|----------------------|
| UP_KEYWORDS | RNA-binding | 50    | 2.97848894347024E-10 | P62918, P11928, O70133, Q60668, Q6P5F9, P56959, O35130, P32067, Q61990, Q9JKP5, P62751, Q05921, P60335, Q810A7, Q99LX0, Q6PDM2, P70333, O88569, Q6Q899, Q80SW1, Q9CX86, Q8JZX4, Q921F4, Q501J6, Q8VDM6, Q8VIJ6, Q5SF07, A2RSY6, O89086, P62908, Q6PB66, Q61545, P61979, P28352, P62309, P28271, Q14C51, Q64012, P14148, P17225, Q9CQE8, O08583, Q8C2Q3, Q3U0V1, P62305, P62702, P62307, O35737, Q8CCF0, P60843 | 2.76259918193933 | 5.37812561107483E-09 |

|                                         |    |                      |                                                                                                                                                                                                                                                                                                                                                                                                                                                                                |                  |                      |
|-----------------------------------------|----|----------------------|--------------------------------------------------------------------------------------------------------------------------------------------------------------------------------------------------------------------------------------------------------------------------------------------------------------------------------------------------------------------------------------------------------------------------------------------------------------------------------|------------------|----------------------|
| GOTERM_MF_DIRECT GO:0003723~RNA binding | 58 | 7.81979743308571E-07 | P62918, O70133, Q60668, Q6P5F9, O35130, P32067, O35295, Q61990, Q9JKP5, P62751, Q05921, P60335, Q810A7, Q60872, Q60710, Q99LX0, Q6PDM2, P70333, P14131, O88569, Q6Q899, P60867, P62843, Q80SW1, Q9CX86, Q8JZX4, Q921F4, Q501J6, Q8VDM6, Q8VIJ6, Q5SF07, Q8BMJ3, Q6NS46, A2RSY6, O89086, P62908, Q6PB66, Q61545, P61979, P28352, P62309, P28271, Q14C51, Q64012, P14148, P17225, Q9CQE8, O08583, Q8C2Q3, Q3U0V1, P62305, P62702, P08113, P17182, P62307, O35737, Q8CCF0, P60843 | 2.00195473251029 | 5.90093944758237E-05 |
|-----------------------------------------|----|----------------------|--------------------------------------------------------------------------------------------------------------------------------------------------------------------------------------------------------------------------------------------------------------------------------------------------------------------------------------------------------------------------------------------------------------------------------------------------------------------------------|------------------|----------------------|

**Annotation Cluster 23** Enrichment Score: 2.4938811585669423

| Category                               | Term                | Count | PValue            | Genes                                                                                                          | Fold Enrichment  | FDR               |
|----------------------------------------|---------------------|-------|-------------------|----------------------------------------------------------------------------------------------------------------|------------------|-------------------|
| KEGG_PATHWAY                           | mmu04146:Peroxisome | 14    | 0.000475292060846 | P51660, P08228, P24270, Q8JZR0, P99029, P35700, Q8C0L6, P09671, P32020, O88844, Q9DC50, P38060, P41216, Q00519 | 3.10353375223382 | 0.007040263651284 |
| GOTERM_CC_DIRECT GO:0005777~peroxisome |                     | 14    | 0.000526243044691 | P51660, P08228, P24270, P99029, Q8C0L6, P40142, P58044, Q9JHR7, P32020, O88844, Q9DC50, P38060, P41216, Q00519 | 3.1409304076952  | 0.004538846260456 |
| UP_KEYWORDS                            | Peroxisome          | 10    | 0.004997766324026 | P51660, Q8C0L6, P58044, P24270, P32020, P99029, Q9DC50, P38060, P41216, Q00519                                 | 3.10340580999165 | 0.020537695987794 |

**Annotation Cluster 24** Enrichment Score: 2.4570448232814757

| Category | Term | Count | PValue | Genes | Fold Enrichment | FDR |
|----------|------|-------|--------|-------|-----------------|-----|
|----------|------|-------|--------|-------|-----------------|-----|

|                  |                                                                                                            |    |                      |                                                                                                        |                  |                   |
|------------------|------------------------------------------------------------------------------------------------------------|----|----------------------|--------------------------------------------------------------------------------------------------------|------------------|-------------------|
| GOTERM_BP_DIRECT | GO:0002479~antigen processing and presentation of exogenous peptide antigen via MHC class I, TAP-dependent | 10 | 7.53599642198257E-07 | P06339, O70435, P99026, P70195, Q9R233, Q9R1P4, Q9R1P3, P14211, P01902, P01901, P01900, P01899, P01896 | 9.16008105369808 | 0.000191604941616 |
| UP_KEYWORDS      | Proteasome                                                                                                 | 9  | 0.000254831682552    | O70435, Q9CX56, P99026, P70195, O35593, Q9R1P4, Q9WVJ2, Q9R1P3, P14685                                 | 5.33674963396779 | 0.001675518312782 |
| GOTERM_CC_DIRECT | GO:0000502~proteasome complex                                                                              | 9  | 0.001720850171175    | O70435, Q9CX56, P99026, P70195, O35593, Q9R1P4, Q9WVJ2, Q9R1P3, P14685                                 | 4.00774561761109 | 0.012405531831011 |
| KEGG_PATHWAY     | mmu03050:Proteasome                                                                                        | 9  | 0.002560176992409    | O70435, Q9CX56, P99026, P70195, O35593, Q9R1P4, Q9WVJ2, Q9R1P3, P14685                                 | 3.6799043062201  | 0.027056953748162 |
| GOTERM_CC_DIRECT | GO:0008541~proteasome regulatory particle, lid subcomplex                                                  | 4  | 0.002812983709333    | Q9CX56, O35593, Q9WVJ2, P14685                                                                         | 13.0622820129547 | 0.017877251731681 |
| UP_KEYWORDS      | Threonine protease                                                                                         | 5  | 0.003849988704127    | O70435, P99026, P70195, Q9R1P4, Q9R1P3                                                                 | 7.54691867429788 | 0.016801834184912 |
| GOTERM_CC_DIRECT | GO:0005839~proteasome core complex                                                                         | 5  | 0.004144035343441    | O70435, P99026, P70195, Q9R1P4, Q9R1P3                                                                 | 7.347533632287   | 0.024710729270147 |
| GOTERM_CC_DIRECT | GO:0022624~proteasome accessory complex                                                                    | 4  | 0.018604184992103    | Q9CX56, O35593, Q9WVJ2, P14685                                                                         | 6.91532577156423 | 0.087240983992095 |

**Annotation Cluster 25** Enrichment Score: 2.3999624174705922

| Category    | Term            | Count | PValue            | Genes                                                                                                                                                                                                                                          | Fold Enrichment  | FDR               |
|-------------|-----------------|-------|-------------------|------------------------------------------------------------------------------------------------------------------------------------------------------------------------------------------------------------------------------------------------|------------------|-------------------|
| UP_KEYWORDS | Immunity        | 27    | 0.000222186741649 | P06339, P11928, Q9CQW9, P10810, P34884, Q9R1P4, Q9ESY9, P30681, Q61990, Q3TL44, Q9QUN7, P58242, P01899, Q9EPB4, P01896, P04441, Q60710, P26151, Q62418, P42082, Q9R0Q8, Q9ES52, P63158, P16110, P01902, P01901, P09581, P01900, Q6Q899, O35658 | 2.23584523318351 | 0.001498336232144 |
| UP_KEYWORDS | Innate immunity | 17    | 0.0027085079929   | P11928, Q60710, Q9CQW9, P26151, P10810, P34884, P30681, Q61990, P63158, Q3TL44, P16110, Q9QUN7, P58242, P09581, Q9EPB4, Q6Q899, O35658                                                                                                         | 2.34236314040449 | 0.012281682795393 |

**Annotation Cluster 26** Enrichment Score: 2.3865683902433714

| Category        | Term                                             | Count | PValue            | Genes                                                          | Fold Enrichment  | FDR               |
|-----------------|--------------------------------------------------|-------|-------------------|----------------------------------------------------------------|------------------|-------------------|
| INTERPRO        | IPR020575:Heat shock protein Hsp90, N-terminal   | 4     | 0.000134408604693 | Q9CQN1, P07901, P08113, P11499                                 | 30.6458333333333 | 0.032325269428778 |
| INTERPRO        | IPR001404:Heat shock protein Hsp90               | 4     | 0.000134408604693 | Q9CQN1, P07901, P08113, P11499                                 | 30.6458333333333 | 0.032325269428778 |
| PIR_SUPERFAMILY | PIRSF002583:heat shock protein, HSP90/HTPG types | 4     | 0.00095913543333  | Q9CQN1, P07901, P08113, P11499                                 | 15.5775862068966 | 0.098790949632966 |
| UP_KEYWORDS     | Stress response                                  | 8     | 0.007305942439949 | O89086, P07901, Q9JKR6, Q99LX0, E9PVA8, P08113, P11499, Q3UW53 | 3.54202049780381 | 0.028256806789803 |

**Annotation Cluster 27** Enrichment Score: 2.281301357330428

| Category         | Term                                | Count | PValue            | Genes                                                  | Fold Enrichment  | FDR               |
|------------------|-------------------------------------|-------|-------------------|--------------------------------------------------------|------------------|-------------------|
| GOTERM_BP_DIRECT | GO:0006099~tricarboxylic acid cycle | 7     | 0.000522502974117 | Q60597, P14152, O88844, P28271, Q9WUM5, Q9CZU6, Q8BMF4 | 6.63316214233309 | 0.035135139015643 |
| UP_KEYWORDS      | Tricarboxylic acid cycle            | 6     | 0.000780759226329 | P14152, O88844, P28271, Q9WUM5, Q9CZU6, Q8BMF4         | 7.96954612005857 | 0.004666810830105 |
| KEGG_PATHWAY     | mmu00020:Citrate cycle (TCA cycle)  | 7     | 0.006667977218735 | Q60597, P14152, O88844, P28271, Q9WUM5, Q9CZU6, Q8BMF4 | 4.02489533492823 | 0.060405137629932 |

**Annotation Cluster 28** Enrichment Score: 2.2424899481164733

| Category         | Term                          | Count | PValue            | Genes                                  | Fold Enrichment  | FDR               |
|------------------|-------------------------------|-------|-------------------|----------------------------------------|------------------|-------------------|
| UP_KEYWORDS      | Viral nucleoprotein           | 5     | 0.003849988704127 | P61979, Q60668, O88569, P62317, Q35737 | 7.54691867429788 | 0.016801834184912 |
| GOTERM_CC_DIRECT | GO:0019013~viral nucleocapsid | 5     | 0.005929469948427 | P61979, Q60668, O88569, P62317, Q35737 | 6.67957602935181 | 0.033693341001062 |
| UP_KEYWORDS      | Virion                        | 5     | 0.008204551171474 | P61979, Q60668, O88569, P62317, Q35737 | 6.1493411420205  | 0.030825670829966 |

**Annotation Cluster 29** Enrichment Score: 2.1662029833598906

| Category     | Term                              | Count | PValue               | Genes                                                          | Fold Enrichment  | FDR               |
|--------------|-----------------------------------|-------|----------------------|----------------------------------------------------------------|------------------|-------------------|
| KEGG_PATHWAY | mmu00511:Other glycan degradation | 8     | 2.47408093657801E-05 | O09159, O54782, P23780, P20060, Q8K2I4, P17439, Q91W89, P29416 | 8.17756512493355 | 0.000651507979966 |

**Annotation Cluster 30** Enrichment Score: 2.07072484761341

| Category         | Term                                                       | Count | PValue            | Genes                                  | Fold Enrichment  | FDR               |
|------------------|------------------------------------------------------------|-------|-------------------|----------------------------------------|------------------|-------------------|
| INTERPRO         | IPR017998:Chaperone tailless complex polypeptide 1 (TCP-1) | 5     | 0.000306984068067 | P80315, P42932, Q61390, P63038, P80317 | 13.9299242424242 | 0.055372251277508 |
| INTERPRO         | IPR027409:GroEL-like apical domain                         | 5     | 0.000861248576412 | P80315, P42932, Q61390, P63038, P80317 | 10.9449404761905 | 0.095598591981778 |
| INTERPRO         | IPR027413:GroEL-like equatorial domain                     | 5     | 0.000861248576412 | P80315, P42932, Q61390, P63038, P80317 | 10.9449404761905 | 0.095598591981778 |
| GOTERM_CC_DIRECT | GO:0005832~chaperonin-containing T-complex                 | 4     | 0.002812983709333 | P80315, P42932, Q61390, P80317         | 13.0622820129547 | 0.017877251731681 |

**Annotation Cluster 31** Enrichment Score: 2.003328340425609

| Category     | Term                                   | Count | PValue               | Genes                                                          | Fold Enrichment  | FDR               |
|--------------|----------------------------------------|-------|----------------------|----------------------------------------------------------------|------------------|-------------------|
| KEGG_PATHWAY | mmu00531:Glycosaminoglycan degradation | 8     | 7.84163994165305E-05 | Q571E4, Q8BFR4, P23780, P50429, P20060, P48441, P29416, P12265 | 7.00934153565733 | 0.001858468666172 |

**Annotation Cluster 32** Enrichment Score: 1.9787696369460814

| Category         | Term                                     | Count | PValue            | Genes                                                  | Fold Enrichment  | FDR               |
|------------------|------------------------------------------|-------|-------------------|--------------------------------------------------------|------------------|-------------------|
| GOTERM_CC_DIRECT | GO:0005687~U4 snRNP                      | 5     | 0.000235429343554 | P62309, P62305, P62317, P62307, Q8CCF0                 | 14.695067264574  | 0.00236900776951  |
| GOTERM_CC_DIRECT | GO:0005689~U12-type spliceosomal complex | 7     | 0.000241666320848 | Q99NB9, P62309, P83870, P62305, Q35286, P62317, P62307 | 7.61966450755689 | 0.002382139448356 |
| GOTERM_CC_DIRECT | GO:0071011~precatalytic spliceosome      | 6     | 0.002289483983356 | P62309, P83870, P62305, P62317, Q8CCF0, Q6PE01         | 6.29788597053171 | 0.015574940337477 |
| GOTERM_CC_DIRECT | GO:0005686~U2 snRNP                      | 5     | 0.004144035343441 | Q99NB9, P62309, P83870, P62305, P62317                 | 7.347533632287   | 0.024710729270147 |
| GOTERM_CC_DIRECT | GO:0034709~methylosome                   | 4     | 0.00682715253876  | P62309, P62305, P62317, P62307                         | 9.79671150971599 | 0.037902467542772 |
| GOTERM_CC_DIRECT | GO:0034719~SMN-Sm protein complex        | 4     | 0.015710570298598 | P62309, P62305, P62317, P62307                         | 7.347533632287   | 0.07624255617666  |
| GOTERM_CC_DIRECT | GO:0034715~pICln-Sm protein complex      | 3     | 0.015785208318149 | P62305, P62317, P62307                                 | 14.695067264574  | 0.07624255617666  |
| GOTERM_CC_DIRECT | GO:0005682~U5 snRNP                      | 4     | 0.018604184992103 | P62309, P62305, P62317, Q6PE01                         | 6.91532577156423 | 0.087240983992095 |
| GOTERM_CC_DIRECT | GO:0005683~U7 snRNP                      | 3     | 0.021605933643224 | P62309, P62305, P62307                                 | 12.5957719410634 | 0.098276508655177 |

**Annotation Cluster 33** Enrichment Score: 1.8660316202385918

| Category         | Term                        | Count | PValue               | Genes                                                                  | Fold Enrichment  | FDR                  |
|------------------|-----------------------------|-------|----------------------|------------------------------------------------------------------------|------------------|----------------------|
| GOTERM_CC_DIRECT | GO:0030904~retromer complex | 9     | 5.30986390685791E-07 | Q9QZ88, Q6P8X1, Q9CWX8, Q9D8U8, Q80XQ2, O70492, P24668, O08788, Q810B6 | 11.5004874244492 | 1.06861011125515E-05 |

|                                                                   |                                                                                |       |                      |                                                                                                                                                                                |                  |                      |
|-------------------------------------------------------------------|--------------------------------------------------------------------------------|-------|----------------------|--------------------------------------------------------------------------------------------------------------------------------------------------------------------------------|------------------|----------------------|
| GOTERM_CC_DIRECT                                                  | GO:0019898~extrinsic component of membrane                                     | 9     | 0.008239295415784    | Q6P8X1, Q6ZQA0, Q9CWK8, Q9D8U8, P32020, O70311, O70492, Q8VBT9, Q09014                                                                                                         | 3.1118965972039  | 0.044714378492402    |
| <b>Annotation Cluster 34</b> Enrichment Score: 1.781958596890396  |                                                                                |       |                      |                                                                                                                                                                                |                  |                      |
| Category                                                          | Term                                                                           | Count | PValue               | Genes                                                                                                                                                                          | Fold Enrichment  | FDR                  |
| GOTERM_MF_DIRECT                                                  | GO:0004579~dolichyl-diphosphooligosaccharide-protein glycotransferase activity | 5     | 0.000203458720665    | P46978, P61804, Q91YQ5, O54734, Q9DBG6                                                                                                                                         | 14.9571330589849 | 0.007676654037381    |
| GOTERM_CC_DIRECT                                                  | GO:0008250~oligosaccharyltransferase complex                                   | 5     | 0.000235429343554    | P46978, P61804, Q91YQ5, O54734, Q9DBG6                                                                                                                                         | 14.695067264574  | 0.00236900776951     |
| <b>Annotation Cluster 35</b> Enrichment Score: 1.781875783533012  |                                                                                |       |                      |                                                                                                                                                                                |                  |                      |
| Category                                                          | Term                                                                           | Count | PValue               | Genes                                                                                                                                                                          | Fold Enrichment  | FDR                  |
| GOTERM_CC_DIRECT                                                  | GO:0030863~cortical cytoskeleton                                               | 10    | 5.89128343535373E-07 | Q7TPR4, Q8VDD5, P57780, P47753, Q62261, P47754, P47757, P16546, P60710, Q9ES52                                                                                                 | 9.48068855778967 | 1.13819595971034E-05 |
| GOTERM_BP_DIRECT                                                  | GO:0051017~actin filament bundle assembly                                      | 8     | 0.000224036025549    | Q7TPR4, P57780, Q3V0K9, O70200, Q62418, Q9WUM3, Q62188, P60766                                                                                                                 | 6.28119843682154 | 0.018166685954084    |
| <b>Annotation Cluster 36</b> Enrichment Score: 1.6023945208006458 |                                                                                |       |                      |                                                                                                                                                                                |                  |                      |
| Category                                                          | Term                                                                           | Count | PValue               | Genes                                                                                                                                                                          | Fold Enrichment  | FDR                  |
| UP_KEYWORDS                                                       | GTP-binding                                                                    | 22    | 0.001189061298016    | Q62159, Q61820, Q811U4, P28650, Q922F4, Q9WUM5, P10126, P68372, P59325, P84096, P63001, P35293, P62331, Q8R050, P61211, Q8VEH3, P35285, Q9D6F9, P61021, P61028, P08752, P60766 | 2.20042689057842 | 0.006688565786357    |
| GOTERM_MF_DIRECT                                                  | GO:0003924~GTPase activity                                                     | 18    | 0.00207486459923     | Q61599, Q61820, Q811U4, P28650, Q922F4, P10126, P68372, P84096, P63001, P62331, Q8R050, P63213, P61211, P35285, Q9D6F9, P61021, P08752, P60766                                 | 2.3187134502924  | 0.058155490624123    |
| UP_KEYWORDS                                                       | Prenylation                                                                    | 11    | 0.020566549153629    | P84096, P63001, Q9DAS9, Q62159, P35293, P63213, P35285, P61021, P61028, P14733, P60766                                                                                         | 2.32656601169438 | 0.067612530342554    |

**Annotation Cluster 37** Enrichment Score: 1.5747501440414309

| Category         | Term                      | Count | PValue            | Genes                                  | Fold Enrichment  | FDR              |
|------------------|---------------------------|-------|-------------------|----------------------------------------|------------------|------------------|
| GOTERM_CC_DIRECT | GO:0070688~MLL5-L complex | 5     | 0.000145157927238 | Q61191, P62141, P63087, Q8CGY8, P60710 | 16.3278525161933 | 0.00163049485712 |

**Annotation Cluster 38** Enrichment Score: 1.5134485538870548

| Category    | Term                 | Count | PValue            | Genes                                                                                                                  | Fold Enrichment  | FDR               |
|-------------|----------------------|-------|-------------------|------------------------------------------------------------------------------------------------------------------------|------------------|-------------------|
| UP_KEYWORDS | Protein biosynthesis | 15    | 0.000145305560279 | Q60872, Q99JX4, P10711, Q3THG9, O70251, P10126, Q922B2, P59325, Q8R050, Q9CZD3, Q8BMJ2, Q8BMJ3, P26638, Q8QZY1, P60843 | 3.38841246601129 | 0.001005667430349 |

**Annotation Cluster 39** Enrichment Score: 1.4601464293271709

| Category     | Term                           | Count | PValue            | Genes                                                                                          | Fold Enrichment  | FDR               |
|--------------|--------------------------------|-------|-------------------|------------------------------------------------------------------------------------------------|------------------|-------------------|
| UP_KEYWORDS  | Fatty acid metabolism          | 12    | 0.001311750192557 | P51660, P22437, Q8K2C9, Q8BH95, P19096, Q8JZR0, P51174, Q9DC50, Q9JHF7, Q8BMS1, P41216, Q8VEB4 | 3.21352666131394 | 0.007113486216652 |
| KEGG_PATHWAY | mmu01212:Fatty acid metabolism | 10    | 0.001478650610093 | Q8K2C9, Q8BH95, P19096, Q8JZR0, P51174, O88531, O70503, Q8BMS1, P41216, Q8QZT1                 | 3.60774931982362 | 0.017522009729601 |

**Annotation Cluster 40** Enrichment Score: 1.4463498546439604

| Category    | Term          | Count | PValue            | Genes                                                                                                                                                                                  | Fold Enrichment  | FDR               |
|-------------|---------------|-------|-------------------|----------------------------------------------------------------------------------------------------------------------------------------------------------------------------------------|------------------|-------------------|
| UP_KEYWORDS | Cell division | 23    | 0.002139167221713 | P62908, Q9WU78, Q9CW03, Q68FD5, Q80X41, P63280, Q8VDQ8, Q61187, Q9CU62, Q8VE37, P62331, Q4VA53, Q9QWT9, A2AGT5, O35685, Q8VEH3, P62141, P63087, Q9WVA3, Q8BK67, P25322, P08752, P60766 | 2.05308647806168 | 0.010015147180821 |



|             |         |    |                   |                                                                                                                        |                  |                   |
|-------------|---------|----|-------------------|------------------------------------------------------------------------------------------------------------------------|------------------|-------------------|
| UP_KEYWORDS | Mitosis | 15 | 0.025587137840184 | P62908, Q9CW03, Q68FD5, Q80X41, P63280, Q8VDQ8, Q9CU62, Q8VE37, Q4VA53, Q9QWT9, A2AGT5, O35685, Q8VEH3, Q9WVA3, Q8BK67 | 1.92315302124965 | 0.083079225332944 |
|-------------|---------|----|-------------------|------------------------------------------------------------------------------------------------------------------------|------------------|-------------------|

**Annotation Cluster 41** Enrichment Score: 1.4455353973543603

| Category         | Term                               | Count | PValue            | Genes                                                  | Fold Enrichment  | FDR               |
|------------------|------------------------------------|-------|-------------------|--------------------------------------------------------|------------------|-------------------|
| GOTERM_CC_DIRECT | GO:0030136~clathrin-coated vesicle | 7     | 0.014734248736542 | P63024, Q99KN9, Q91ZX7, P98078, Q68FD5, O70492, Q7M6Y3 | 3.48696511362773 | 0.072873607387452 |

**Annotation Cluster 42** Enrichment Score: 1.4368617249451718

| Category    | Term         | Count | PValue            | Genes                                                                          | Fold Enrichment  | FDR               |
|-------------|--------------|-------|-------------------|--------------------------------------------------------------------------------|------------------|-------------------|
| UP_KEYWORDS | FAD          | 10    | 0.009341318687005 | Q9DCN2, Q3U4I7, Q8CIZ9, Q8C0L6, Q61093, P51174, Q9JMH6, P52019, Q8R180, Q00519 | 2.81410526838226 | 0.034602349502568 |
| UP_KEYWORDS | Flavoprotein | 10    | 0.016821360514084 | Q9DCN2, Q3U4I7, Q8CIZ9, Q8C0L6, Q61093, P51174, Q9JMH6, P52019, Q8R180, Q00519 | 2.55434170514698 | 0.056718177118001 |

**Annotation Cluster 43** Enrichment Score: 1.4259918037079657

| Category         | Term                                | Count | PValue            | Genes                                          | Fold Enrichment  | FDR               |
|------------------|-------------------------------------|-------|-------------------|------------------------------------------------|------------------|-------------------|
| GOTERM_BP_DIRECT | GO:0006754~ATP biosynthetic process | 6     | 0.001217322206711 | O55126, P56135, P52480, P05064, Q03265, P56480 | 7.16875908550284 | 0.076276302815929 |
| UP_KEYWORDS      | Hydrogen ion transport              | 6     | 0.010970477085582 | P50518, P56135, Q9CR51, Q03265, P51863, P56480 | 4.42752562225476 | 0.039523773609701 |
| UP_KEYWORDS      | ATP synthesis                       | 3     | 0.05656345916408  | P56135, Q03265, P56480                         | 7.66302511544093 | 0.152777262783986 |

**Annotation Cluster 44** Enrichment Score: 1.3856913094370495

| Category | Term                                                     | Count | PValue            | Genes                                                  | Fold Enrichment  | FDR               |
|----------|----------------------------------------------------------|-------|-------------------|--------------------------------------------------------|------------------|-------------------|
| BIOCARTA | m_eradPathway:ERi1%associated degradation (ERAD) Pathway | 7     | 0.000353960558584 | O09159, Q80UM7, Q9R1T2, Q9Z1F9, P63280, P35564, Q8BHN3 | 6.39929078014184 | 0.063004979427878 |

**Annotation Cluster 45** Enrichment Score: 1.2670232088698443

| Category    | Term                   | Count | PValue            | Genes                                          | Fold Enrichment  | FDR               |
|-------------|------------------------|-------|-------------------|------------------------------------------------|------------------|-------------------|
| UP_KEYWORDS | Hydrogen ion transport | 6     | 0.010970477085582 | P50518, P56135, Q9CR51, Q03265, P51863, P56480 | 4.42752562225476 | 0.039523773609701 |

**Annotation Cluster 46** Enrichment Score: 1.2388107932329662

| Category         | Term                               | Count | PValue            | Genes                                                  | Fold Enrichment  | FDR               |
|------------------|------------------------------------|-------|-------------------|--------------------------------------------------------|------------------|-------------------|
| GOTERM_CC_DIRECT | GO:0030136~clathrin-coated vesicle | 7     | 0.014734248736542 | P63024, Q99KN9, Q91ZX7, P98078, Q68FD5, O70492, Q7M6Y3 | 3.48696511362773 | 0.072873607387452 |

**Annotation Cluster 47** Enrichment Score: 1.2069771182148312

| Category    | Term               | Count | PValue           | Genes                                                                          | Fold Enrichment  | FDR               |
|-------------|--------------------|-------|------------------|--------------------------------------------------------------------------------|------------------|-------------------|
| UP_KEYWORDS | Biological rhythms | 10    | 0.01396167124391 | O09106, P23198, Q8VIJ6, Q60668, O70133, P62141, P63087, Q8CGY8, Q04750, Q9WTK5 | 2.63543191800878 | 0.048314730751952 |

**Annotation Cluster 48** Enrichment Score: 1.1885792630607002

| Category    | Term              | Count | PValue            | Genes                                                                                                  | Fold Enrichment | FDR               |
|-------------|-------------------|-------|-------------------|--------------------------------------------------------------------------------------------------------|-----------------|-------------------|
| UP_KEYWORDS | GTPase activation | 13    | 0.003897003366082 | Q8BYA0, P50396, Q61599, Q5SSL4, Q61210, Q8BMG7, Q640N3, Q3TBD2, Q80XQ2, Q8BYW1, Q6PFQ7, Q5FWK3, Q8BQZ4 | 2.6483665531892 | 0.016801834184912 |

**Annotation Cluster 49** Enrichment Score: 1.1209470651979352

| Category     | Term                                       | Count | PValue            | Genes                                                                                                  | Fold Enrichment  | FDR               |
|--------------|--------------------------------------------|-------|-------------------|--------------------------------------------------------------------------------------------------------|------------------|-------------------|
| KEGG_PATHWAY | mmu04662:B cell receptor signaling pathway | 13    | 0.000332881259704 | Q60631, P27870, P29351, Q60591, Q9EQ32, Q9ES52, P63001, P63085, Q8CIH5, P63328, P08101, P25799, P31938 | 3.41705399863295 | 0.005635204182133 |

**Annotation Cluster 50** Enrichment Score: 1.062168927358502

| Category | Term | Count | PValue | Genes | Fold Enrichment | FDR |
|----------|------|-------|--------|-------|-----------------|-----|
|----------|------|-------|--------|-------|-----------------|-----|

|             |               |     |                   |                                                                                                                                                                                                                                                                                                                                                                                                                                                                                                                                                                                                                                                                                                                                                                                                                                                                                                                                                                                                                                 |                   |  |
|-------------|---------------|-----|-------------------|---------------------------------------------------------------------------------------------------------------------------------------------------------------------------------------------------------------------------------------------------------------------------------------------------------------------------------------------------------------------------------------------------------------------------------------------------------------------------------------------------------------------------------------------------------------------------------------------------------------------------------------------------------------------------------------------------------------------------------------------------------------------------------------------------------------------------------------------------------------------------------------------------------------------------------------------------------------------------------------------------------------------------------|-------------------|--|
|             |               |     |                   | Q7TSV4, P12815, P55264, P34960, P11688, Q3U7R1, Q61036, P63328, O89023, Q60597, Q8VCT3, P50428, Q64430, Q61164, P50543, O55023, P14211, O55143, P50429, O88844, Q6PCN7, Q8K183, E9Q555, Q3V0K9, Q8BYI6, Q6PB93, Q5SUR0, O54782, P22437, P40142, P58044, Q6PFQ7, Q80VA0, Q9Z0S1, Q9D0F3, Q9Z2W0, A2RSY6, Q9DBR1, O89001, P05555, Q61545, Q8BH61, Q3THG9, Q6NSR8, P11835, P28271, Q8VDL4, Q8WTY4, P70158, O08739, O09159, Q3TBD2, Q9QZ88, P16332, P61211, P62141, P38060, E9Q1P8, Q810B6, Q3UFY7, P81117, Q8BFR4, Q11136, P11928, Q91ZX7, B2RQC6, P10711, Q9Z277, P56399, P70340, P56959, Q9JKP5, Q9JHR7, P63087, Q9Z1F9, Q05921, P52480, Q91V76, Q00519, Q60710, P28650, O70200, Q8VHR5, P97315, P35564, P16546, O08997, Q9WVQ5, P57780, Q61093, Q99N69, Q6Q899, Q91W89, Q8QZT1, P08775, P00493, Q7TPR4, Q9CY64, O08529, O35593, P11103, Q8VDQ8, P29391, Q9CPU0, Q9JM14, Q571E4, P07091, P09671, P58242, P00405, Q9CXT8, G5E829, Q99KH8, Q8CIZ9, P08228, P28352, P24270, Q62318, Q80W54, Q9EQP2, P14069, P13020, Q8CHP8, Q8C9B9, |                   |  |
| UP_KEYWORDS | Metal-binding | 131 | 0.001834345626021 | 1.28130896137417                                                                                                                                                                                                                                                                                                                                                                                                                                                                                                                                                                                                                                                                                                                                                                                                                                                                                                                                                                                                                | 0.009472941329794 |  |

|                                               |     |                   |                                                                                                                                                                                                                                                                                                                                                                                                                                                                                                                                                                                                                                                                                                                                                                                                                                                                                                                                                                                                                         |                   |  |
|-----------------------------------------------|-----|-------------------|-------------------------------------------------------------------------------------------------------------------------------------------------------------------------------------------------------------------------------------------------------------------------------------------------------------------------------------------------------------------------------------------------------------------------------------------------------------------------------------------------------------------------------------------------------------------------------------------------------------------------------------------------------------------------------------------------------------------------------------------------------------------------------------------------------------------------------------------------------------------------------------------------------------------------------------------------------------------------------------------------------------------------|-------------------|--|
|                                               |     |                   | Q7TSV4, P12815, P55264, P34960, P11688, Q3U7R1, Q61036, P63328, O89023, Q60597, Q8VCT3, P50428, Q64430, Q61164, P50543, O55023, P14211, O55143, P50429, O88844, Q6PCN7, Q8K183, E9Q555, Q3V0K9, Q8BYI6, Q6PB93, Q5SUR0, O54782, P22437, P40142, P58044, Q6PFQ7, Q80VA0, Q9Z0S1, Q9D0F3, Q9Z2W0, A2RSY6, Q9DBR1, O89001, P05555, Q61545, Q8BH61, Q3THG9, Q6NSR8, P11835, P28271, Q8VDL4, Q8WTY4, P70158, O08739, O09159, Q3TBD2, Q9QZ88, P16332, P61211, P62141, P38060, E9Q1P8, Q810B6, Q3UFY7, P81117, Q8BFR4, Q11136, P11928, Q91ZX7, B2RQC6, P10711, Q9Z277, P56399, P70340, Q9JKP5, Q9JHR7, P63087, Q9Z1F9, Q05921, P52480, Q91V76, Q00519, Q60710, P28650, O70200, Q8VHR5, P97315, P35564, P16546, O08997, Q9WVQ5, P57780, Q61093, Q99N69, Q6Q899, Q91W89, Q8QZT1, P08775, P00493, Q7TPR4, Q9CY64, O08529, O35593, P11103, Q8VDQ8, Q9CPU0, Q9JM14, Q571E4, P07091, P09671, P58242, P00405, Q9CXT8, G5E829, Q99KH8, Q8CIZ9, P08228, P28352, P24270, Q62318, Q80W54, Q9EQP2, P14069, P13020, Q8CHP8, Q8C9B9, Q9WUA3, |                   |  |
| GOTERM_MF_DIRECT GO:0046872~metal ion binding | 128 | 0.418953973596052 | 1.02716049382716                                                                                                                                                                                                                                                                                                                                                                                                                                                                                                                                                                                                                                                                                                                                                                                                                                                                                                                                                                                                        | 0.970326409495549 |  |

|             |      |    |                   |                                                                                                                                                                                                                                                                                                                                                                                                                                                                        |                   |                   |
|-------------|------|----|-------------------|------------------------------------------------------------------------------------------------------------------------------------------------------------------------------------------------------------------------------------------------------------------------------------------------------------------------------------------------------------------------------------------------------------------------------------------------------------------------|-------------------|-------------------|
| UP_KEYWORDS | Zinc | 57 | 0.846926526495965 | Q62523, P27870, P52431, P10711, B2RQC6, P56399, Q9Z277, P70340, P34960, P56959, Q9JKP5, Q9JHR7, Q9Z1F9, Q05921, P63328, Q91V76, Q60710, Q8VCT3, Q8VHR5, P97315, Q61164, Q9WVQ5, P14211, Q99N69, Q6PCN7, Q8K183, Q6Q899, Q91W89, P08775, E9Q555, Q9CY64, O35593, P11103, Q8VDQ8, Q9CPU0, O54782, P58242, Q6PFQ7, Q9CXT8, Q9Z2W0, A2RSY6, Q9DBR1, O89001, P08228, Q61545, Q62318, Q3THG9, Q6NSR8, Q80W54, P70158, O08739, O09159, Q3TBD2, Q9QZ88, Q8C9B9, E9Q1P8, Q810B6 | 0.901747119349171 | 0.846926526495965 |
|-------------|------|----|-------------------|------------------------------------------------------------------------------------------------------------------------------------------------------------------------------------------------------------------------------------------------------------------------------------------------------------------------------------------------------------------------------------------------------------------------------------------------------------------------|-------------------|-------------------|

**Annotation Cluster 57** Enrichment Score: 1.0227297981554944

| Category         | Term                                                             | Count | PValue            | Genes                          | Fold Enrichment  | FDR               |
|------------------|------------------------------------------------------------------|-------|-------------------|--------------------------------|------------------|-------------------|
| GOTERM_BP_DIRECT | GO:1903076~regulation of protein localization to plasma membrane | 4     | 0.001497825732521 | Q62261, O70404, O70439, O88384 | 15.7029960920538 | 0.089771859664376 |

**Annotation Cluster 58** Enrichment Score: 0.9341811400985971

| Category    | Term                   | Count | PValue            | Genes                                          | Fold Enrichment  | FDR               |
|-------------|------------------------|-------|-------------------|------------------------------------------------|------------------|-------------------|
| UP_KEYWORDS | Hydrogen ion transport | 6     | 0.010970477085582 | P50518, P56135, Q9CR51, Q03265, P51863, P56480 | 4.42752562225476 | 0.039523773609701 |

**Annotation Cluster 59** Enrichment Score: 0.868076369880284

| Category    | Term                    | Count | PValue            | Genes                                                                  | Fold Enrichment  | FDR              |
|-------------|-------------------------|-------|-------------------|------------------------------------------------------------------------|------------------|------------------|
| UP_KEYWORDS | Carbohydrate metabolism | 9     | 0.006514340407497 | O88958, Q7TSV4, Q00612, Q8CI94, P62141, P63087, Q8CHP8, Q8BMF4, Q6ZQI3 | 3.24845629893692 | 0.02557121682346 |

**Annotation Cluster 61** Enrichment Score: 0.7602670794175364

| Category | Term | Count | PValue | Genes | Fold Enrichment | FDR |
|----------|------|-------|--------|-------|-----------------|-----|
|----------|------|-------|--------|-------|-----------------|-----|

|                  |                                                |   |                   |                                                                        |                  |                   |
|------------------|------------------------------------------------|---|-------------------|------------------------------------------------------------------------|------------------|-------------------|
| GOTERM_BP_DIRECT | GO:0006911~phagocytosis, engulfment            | 9 | 0.000190838852699 | P21956, P63001, P13020, Q8VDD5, P26151, O70200, P08508, P08101, Q8BPU7 | 5.49604863221885 | 0.016269619470188 |
| GOTERM_BP_DIRECT | GO:0050766~positive regulation of phagocytosis | 8 | 0.001630951317362 | P21956, P14211, P26151, Q5SSL4, P08508, P08101, Q9EPB4, Q8C3J5         | 4.58004052684904 | 0.095670910254638 |
| UP_KEYWORDS      | IgG-binding protein                            | 3 | 0.005203542334819 | P26151, P08508, P08101                                                 | 24.904831625183  | 0.02105433283165  |

**Annotation Cluster 62** Enrichment Score: 0.7283051462650213

| Category         | Term                                                                            | Count | PValue            | Genes                                                                                  | Fold Enrichment  | FDR               |
|------------------|---------------------------------------------------------------------------------|-------|-------------------|----------------------------------------------------------------------------------------|------------------|-------------------|
| GOTERM_CC_DIRECT | GO:0030670~phagocytic vesicle membrane                                          | 8     | 0.000975832789768 | P06339, Q9QUN7, P01902, P35285, P01901, P01900, P61028, P01899, Q9R233, P01896, O35639 | 5.00257609006774 | 0.007726676023901 |
| GOTERM_CC_DIRECT | GO:0071556~integral component of luminal side of endoplasmic reticulum membrane | 4     | 0.013089951786648 | P06339, P01902, P01901, P01900, P01899, P35564, P01896                                 | 7.8373692077728  | 0.06726007141437  |

**Annotation Cluster 67** Enrichment Score: 0.5142599282072734

| Category     | Term                                       | Count | PValue            | Genes                                                                                                                                  | Fold Enrichment  | FDR               |
|--------------|--------------------------------------------|-------|-------------------|----------------------------------------------------------------------------------------------------------------------------------------|------------------|-------------------|
| KEGG_PATHWAY | mmu04662:B cell receptor signaling pathway | 13    | 0.000332881259704 | Q60631, P27870, P29351, Q60591, Q9EQ32, Q9ES52, P63001, P63085, Q8CIH5, P63328, P08101, P25799, P31938                                 | 3.41705399863295 | 0.005635204182133 |
| KEGG_PATHWAY | mmu04380:Osteoclast differentiation        | 17    | 0.00121651023727  | Q60631, Q8CIZ9, P26151, O70145, P08508, Q60591, Q9WTK5, Q09014, P63001, P63085, Q61093, P09581, Q8CIH5, P63328, P08101, P25799, P31938 | 2.48247512721197 | 0.01517436453858  |

**Annotation Cluster 68** Enrichment Score: 0.27288716146073455

| Category | Term | Count | PValue | Genes | Fold Enrichment | FDR |
|----------|------|-------|--------|-------|-----------------|-----|
|----------|------|-------|--------|-------|-----------------|-----|

|             |             |    |                   |                                                                                                                                                                                                                                                                                                                                                                                                                                                                                                                                                                                                                            |                  |                   |
|-------------|-------------|----|-------------------|----------------------------------------------------------------------------------------------------------------------------------------------------------------------------------------------------------------------------------------------------------------------------------------------------------------------------------------------------------------------------------------------------------------------------------------------------------------------------------------------------------------------------------------------------------------------------------------------------------------------------|------------------|-------------------|
| UP_KEYWORDS | Transferase | 68 | 0.007909661753991 | Q9D964, P11928, P52431,<br>B2RQC6, P19096, Q9Z277,<br>P55264, Q8CGY8, O70172,<br>Q9JHF7, O35130, P68181, Q61036,<br>Q9WTP6, Q9DBP5, Q9CZN7,<br>P63085, Q9DC50, P31938, P52480,<br>Q9JJZ4, P10649, Q9DBC7,<br>Q91YQ5, Q8BMF4, Q9DBG6,<br>P46978, Q9D6K9, Q68FH4,<br>P32020, P09581, O54734, Q8K183,<br>O09131, Q9CZU6, Q8QZT1,<br>P08775, P23492, P00493, P61804,<br>Q8BYI6, O70311, Q6PB93,<br>Q80X41, P11103, O08528, Q93092,<br>Q9CPU4, Q99L20, Q9CWL9,<br>P68037, P40142, Q04899, Q80VA0,<br>O54988, Q99KH8, Q8K297,<br>Q8VEB4, A2RSY6, Q8BH61,<br>Q60855, Q8CI94, Q8VDL4, Q61263,<br>Q04447, Q9Z110, P29758,<br>Q9WUA3 | 1.36519834785364 | 0.030148420888399 |
|-------------|-------------|----|-------------------|----------------------------------------------------------------------------------------------------------------------------------------------------------------------------------------------------------------------------------------------------------------------------------------------------------------------------------------------------------------------------------------------------------------------------------------------------------------------------------------------------------------------------------------------------------------------------------------------------------------------------|------------------|-------------------|
