# Supplementary material for: Repeated Exposure of Macrophages to Synthetic Amorphous Silica Induces Adaptive Proteome Changes and a Moderate Cell Activation
Source: MDPI journal article supplement (doi:10.3390/nano12091424), 2022-04-22
Supplement: s1 [file s1]

Table S2: list of proteins modulated in response to treatment with precipitated silica

Coverage: % coverage of the protein sequence by the peptides identified in the mass spectrometry analysis

#peptides: number of peptides used for protein identification

U PR vs ctrl: result of the Mann Whitney U test in the comparison control vs treated with precipitated silica

B-H: evaluation of the false positive rate by the Benjamini-Hochberg method

SGoF+ : evaluation of the false positive rate by the Sequential Goodness of Fit method

Sfisher : : evaluation of the false positive rate by the Sequential Fisher test method

| accession number | gene_name | description                                             | protein_set_score | coverage | MW     | #peptides | U pr vs ctrl | ratio PR/ctrl | B-H      | SGoF+          | Sfisher        |
|------------------|-----------|---------------------------------------------------------|-------------------|----------|--------|-----------|--------------|---------------|----------|----------------|----------------|
| A0A0B4J1G0       | Fcgr4     | Low affinity immunoglobulin gamma Fc region receptor IV | 72.487            | 18.07    | 28398  | 4         | 0            | 0.70647232    | 0.002224 | 0              | 0              |
| A1L314           | Mpeg1     | Macrophage-expressed gene 1 protein                     | 674.945           | 37.87    | 78390  | 18        | 0            | 1.72939303    | 0.011752 | 1.4863942E-232 | 0              |
| A2ADY9           | Ddi2      | Protein DDI1 homolog 2                                  | 137.299           | 18.8     | 44591  | 4         | 0            | 0.58794931    | 0.010214 | 7.9209309E-261 | 0              |
| A2APV2           | Fmn12     | Formin-like protein 2                                   | 199.494           | 4.88     | 123101 | 6         | 0            | 0.88410624    | 0.008997 | 2.7730879E-283 | 0              |
| A9UMV8           | H2afj     | Histone H2A.J                                           | 423.071           | 64.34    | 14045  | 9         | 0            | 1.10804837    | 0.029274 | 1.8244111E-131 | 6.0622739E-202 |
| B0BNM9           | GLTP      | Glycolipid transfer protein                             | 119.801           | 32.54    | 23704  | 4         | 0            | 0.67720267    | 0.012682 | 9.9453868E-225 | 0              |
| B9EJ86           | Osbpl8    | Oxysterol-binding protein-related protein 8             | 668.143           | 27.11    | 101269 | 18        | 0            | 1.26530957    | 0.008063 | 4.4363205E-294 | 0              |
| E9PVA8           | Gcn1      | eIF-2-alpha kinase activator GCN1                       | 950.724           | 15.46    | 293021 | 30        | 0            | 1.24035538    | 0.025521 | 1.9862693E-148 | 4.5504231E-228 |
| E9Q555           | Rnf213    | E3 ubiquitin-protein ligase RNF213                      | 1509.702          | 11.59    | 584784 | 40        | 0            | 1.24941177    | 0.0087   | 5.3527353E-284 | 0              |
| E9Q7G0           | Numa1     | Nuclear mitotic apparatus protein 1                     | 1707.656          | 34.62    | 235630 | 48        | 0            | 0.81143072    | 0.005135 | 0              | 0              |
| F1LMZ8           | Psmd11    | 26S proteasome non-ATPase regulatory subunit 11         | 596.643           | 43.13    | 47464  | 16        | 0            | 1.15881201    | 0.007835 | 5.7646359e-311 | 0              |
| F1LQ48           | Hnrnp1    | Heterogeneous nuclear ribonucleoprotein L               | 894.689           | 60.67    | 67903  | 25        | 0            | 0.82745035    | 0.004489 | 0              | 0              |

|        |        |                                                                      |         |       |        |    |   |            |          |                |                |
|--------|--------|----------------------------------------------------------------------|---------|-------|--------|----|---|------------|----------|----------------|----------------|
| G5E829 | Atp2b1 | Plasma membrane calcium-transporting ATPase 1                        | 383.056 | 12.54 | 134747 | 11 | 0 | 1.24452434 | 0.03984  | 6.1296177E-86  | 2.9142912E-135 |
| O08528 | Hk2    | Hexokinase-2                                                         | 826.505 | 39.04 | 102535 | 30 | 0 | 0.83772963 | 0.07505  | 1.6194543E-28  | 5.2690089E-57  |
| O08529 | Capn2  | Calpain-2 catalytic subunit                                          | 654.542 | 36.43 | 79872  | 20 | 0 | 0.87928496 | 0.061276 | 5.3020797E-46  | 4.4413436E-80  |
| O08553 | Dpysl2 | Dihydropyrimidinase-related protein 2                                | 1630.64 | 79.2  | 62278  | 33 | 0 | 0.74141408 | 0.001188 | 0              | 0              |
| O08583 | Alyref | THO complex subunit 4                                                | 246.457 | 41.96 | 26940  | 5  | 0 | 0.57738177 | 0.006432 | 3.4912655e-319 | 0              |
| O08709 | Prdx6  | Peroxiredoxin-6                                                      | 499.923 | 80.36 | 24871  | 13 | 0 | 0.82868378 | 0.013727 | 3.2377391E-220 | 0              |
| O08739 | Ampd3  | AMP deaminase 3                                                      | 178.866 | 10.05 | 88652  | 8  | 0 | 1.29438732 | 0.02368  | 7.6061336E-163 | 7.8468903E-251 |
| O08807 | Prdx4  | Peroxiredoxin-4                                                      | 341.044 | 54.74 | 31053  | 12 | 0 | 1.2954477  | 0.005367 | 0              | 0              |
| O08997 | Atox1  | Copper transport protein ATOX1                                       | 124.127 | 58.82 | 7338   | 4  | 0 | 0.67163739 | 0.055562 | 1.0031745E-51  | 9.5481778E-88  |
| O09106 | Hdac1  | Histone deacetylase 1                                                | 262.786 | 23.24 | 55075  | 7  | 0 | 0.85799916 | 0.051736 | 6.1718233E-60  | 6.4309689E-99  |
| O09131 | Gsto1  | Glutathione S-transferase omega-1                                    | 126.438 | 29.17 | 27498  | 6  | 0 | 0.86504129 | 0.057716 | 1.1356506E-49  | 5.5428854E-85  |
| O09159 | Man2b1 | Lysosomal alpha-mannosidase                                          | 557.178 | 24.38 | 114648 | 17 | 0 | 0.54320371 | 0.001188 | 0              | 0              |
| O35129 | Phb2   | Prohibitin-2                                                         | 503.598 | 58.19 | 33296  | 15 | 0 | 1.12983593 | 0.018274 | 1.6378345E-188 | 2.9667428E-293 |
| O35295 | Purb   | Transcriptional activator protein Pur-beta                           | 243.206 | 24.38 | 33901  | 4  | 0 | 0.79872641 | 0.037205 | 2.3005038E-98  | 4.3390717E-153 |
| O35344 | Kpna3  | Importin subunit alpha-4                                             | 211.239 | 15.16 | 57773  | 5  | 0 | 1.3347877  | 0.035734 | 2.9524072E-106 | 1.7282975E-164 |
| O35601 | Fyb1   | FYN-binding protein 1                                                | 254     | 13.92 | 90055  | 9  | 0 | 1.16785176 | 0.052965 | 3.1392057E-55  | 1.6193787E-92  |
| O35609 | Scamp3 | Secretory carrier-associated membrane protein 3                      | 184.82  | 16.33 | 38458  | 3  | 0 | 0.81661913 | 0.030798 | 8.2495148E-123 | 7.1832476E-189 |
| O35658 | C1qbp  | Complement component 1 Q subcomponent-binding protein, mitochondrial | 176.214 | 24.82 | 31013  | 5  | 0 | 1.24658249 | 0.028622 | 1.2647574E-135 | 2.8751219E-208 |
| O35682 | Myadm  | Myeloid-associated differentiation marker                            | 99.873  | 13.12 | 35285  | 3  | 0 | 1.23427099 | 0.010103 | 2.3124309E-273 | 0              |
| O35691 | Pnn    | Pinin                                                                | 55.561  | 3.17  | 82436  | 2  | 0 | 0.29052094 | 0.001188 | 0              | 0              |

|        |           |                                                                                |          |       |        |    |   |            |          |                |                |
|--------|-----------|--------------------------------------------------------------------------------|----------|-------|--------|----|---|------------|----------|----------------|----------------|
| O35737 | Hnrnp1    | Heterogeneous nuclear ribonucleoprotein H                                      | 631.314  | 41.2  | 49199  | 14 | 0 | 0.86956008 | 0.011191 | 7.9390655E-240 | 0              |
| O35964 | Sh3gl1    | Endophilin-A2                                                                  | 113.857  | 13.59 | 41492  | 4  | 0 | 0.72367191 | 0.014603 | 1.8005191E-214 | 0              |
| O35987 | Nsf1c     | NSFL1 cofactor p47                                                             | 378.771  | 31.08 | 40680  | 8  | 0 | 0.82960963 | 0.020084 | 8.0409777E-178 | 2.9573354E-275 |
| O54734 | Ddost     | Dolichyl-diphosphooligosacch aride--protein glycosyltransferase 48 kDa subunit | 568.017  | 50.57 | 49028  | 15 | 0 | 1.27255907 | 0.001188 | 0              | 0              |
| O54782 | Man2b2    | Epididymis-specific alpha-mannosidase STE20-like                               | 109.642  | 6.39  | 115610 | 3  | 0 | 0.52966468 | 0.029274 | 5.986259E-131  | 3.6796444E-201 |
| O54988 | Slk       | serine/threonine-protein kinase                                                | 256.181  | 9     | 141457 | 9  | 0 | 0.72742318 | 0.005135 | 0              | 0              |
| O55023 | Impa1     | Inositol monophosphatase 1                                                     | 249.78   | 32.85 | 30436  | 7  | 0 | 0.80024582 | 0.014748 | 6.5439262E-207 | 0              |
| O55126 | Nipsnap2  | Protein NipSnap homolog 2                                                      | 84.772   | 21.71 | 32933  | 4  | 0 | 0.64663038 | 0.164185 | 1              | 0.014553036    |
| O55173 | Pdpk1     | 3-phosphoinositide-dependent protein kinase 1                                  | 52.966   | 4.47  | 63593  | 2  | 0 | 0.49361961 | 0.033895 | 6.8107435E-115 | 3.984154E-177  |
| O70370 | Ctss      | Cathepsin S                                                                    | 545.861  | 51.76 | 38475  | 11 | 0 | 0.73787218 | 0.001905 | 0              | 0              |
| O70439 | Stx7      | Syntaxin-7                                                                     | 430.805  | 44.83 | 29821  | 8  | 0 | 0.81522052 | 0.006381 | 0              | 0              |
| O70492 | Snx3      | Sorting nexin-3                                                                | 216.177  | 62.35 | 18757  | 8  | 0 | 0.8155763  | 0.02442  | 4.0279998E-156 | 3.5271212E-240 |
| O70503 | Hsd17b12  | Very-long-chain 3-oxoacyl-CoA reductase                                        | 331.683  | 42.31 | 34742  | 10 | 0 | 1.18862654 | 0.008078 | 1.8396375E-290 | 0              |
| O70593 | Sgta      | Small glutamine-rich tetratricopeptide repeat-containing protein alpha         | 62.997   | 7.96  | 34157  | 2  | 0 | 0.62947562 | 0.009488 | 7.4036663E-282 | 0              |
| O88339 | Epn1      | Epsin-1                                                                        | 34.239   | 5.74  | 60158  | 2  | 0 | 0.67453201 | 0.02707  | 1.686759E-142  | 7.5745291E-219 |
| O88384 | Vti1b     | Vesicle transport through interaction with t-SNAREs homolog 1B                 | 104.755  | 15.09 | 26713  | 3  | 0 | 0.61389224 | 0.020981 | 3.7350406E-173 | 1.5017292E-267 |
| O88569 | Hnrnpa2b1 | Heterogeneous nuclear ribonucleoproteins A2/B1                                 | 1252.754 | 68.84 | 37403  | 26 | 0 | 0.80569954 | 0.00966  | 1.3506458E-277 | 0              |
| O88746 | Tom1      | Target of Myb protein 1                                                        | 200.291  | 21.14 | 54325  | 6  | 0 | 0.8650813  | 0.065553 | 2.8580516E-40  | 1.7756947E-72  |

|        |        |                                                         |          |       |        |    |   |            |          |                |                |
|--------|--------|---------------------------------------------------------|----------|-------|--------|----|---|------------|----------|----------------|----------------|
| O88844 | Idh1   | Isocitrate dehydrogenase [NADP] cytoplasmic             | 570.313  | 39.13 | 46674  | 14 | 0 | 0.83330349 | 0.00381  | 0              | 0              |
| O88958 | Gnpda1 | Glucosamine-6-phosphate isomerase 1                     | 167.953  | 39.1  | 32549  | 6  | 0 | 0.66236905 | 0.005367 | 0              | 0              |
| O89001 | Cpd    | Carboxypeptidase D                                      | 105.263  | 3.49  | 152406 | 5  | 0 | 1.19493637 | 0.003303 | 0              | 0              |
| O89017 | Lgmn   | Legumain                                                | 154.612  | 13.1  | 49373  | 3  | 0 | 0.52723812 | 0.01245  | 3.0494471E-231 | 0              |
| O89023 | Tpp1   | Tripeptidyl-peptidase 1                                 | 205.19   | 24.56 | 61342  | 5  | 0 | 0.63687121 | 0.007393 | 1.9484499e-315 | 0              |
| P00493 | Hprt1  | Hypoxanthine-guanine phosphoribosyltransferase          | 409.853  | 59.17 | 24570  | 10 | 0 | 0.78872128 | 0.005367 | 0              | 0              |
| P01899 | H2-D1  | H-2 class I histocompatibility antigen, D-B alpha chain | 255.44   | 28.45 | 40836  | 9  | 0 | 1.30979099 | 0.010109 | 1.4827993E-270 | 0              |
| P01900 | H2-D1  | H-2 class I histocompatibility antigen, D-D alpha chain | 393.694  | 33.42 | 41110  | 12 | 0 | 1.27314072 | 0.01032  | 9.1968549E-259 | 0              |
| P01901 | H2-K1  | H-2 class I histocompatibility antigen, K-B alpha chain | 85.959   | 9.21  | 41302  | 4  | 0 | 1.31820789 | 0.010247 | 1.888527E-259  | 0              |
| P01902 | H2-K1  | H-2 class I histocompatibility antigen, K-D alpha chain | 345.838  | 33.15 | 41490  | 11 | 0 | 1.42907365 | 0.001905 | 0              | 0              |
| P02262 |        | Histone H2A type 1                                      | 466.815  | 63.85 | 14077  | 10 | 0 | 1.09853146 | 0.037286 | 3.4314231E-95  | 1.6464505E-148 |
| P04441 | Cd74   | H-2 class II histocompatibility antigen gamma chain     | 251.246  | 21.51 | 31557  | 6  | 0 | 1.09325279 | 0.048897 | 1.9817453E-64  | 4.6972975E-105 |
| P05063 | Aldoc  | Fructose-bisphosphate aldolase C                        | 1174.329 | 80.17 | 39395  | 30 | 0 | 0.81567825 | 0.004996 | 0              | 0              |
| P05064 | Aldoa  | Fructose-bisphosphate aldolase A                        | 1657.605 | 92.31 | 39356  | 40 | 0 | 0.85526035 | 0.004841 | 0              | 0              |
| P05555 | Itgam  | Integrin alpha-M CD11b                                  | 968.769  | 29.31 | 127481 | 23 | 0 | 0.88841505 | 0.009994 | 6.887236E-277  | 0              |

|        |          |                                                          |          |       |        |    |   |            |          |                |                |
|--------|----------|----------------------------------------------------------|----------|-------|--------|----|---|------------|----------|----------------|----------------|
| P06151 | Ldha     | L-lactate dehydrogenase A chain                          | 1682.741 | 84.64 | 36499  | 35 | 0 | 0.90082785 | 0.008063 | 1.5653415E-295 | 0              |
| P06339 | H2-T23   | H-2 class I histocompatibility antigen, D-37 alpha chain | 147.539  | 8.68  | 40875  | 3  | 0 | 1.47266368 | 0.00272  | 0              | 0              |
| P06745 | Gpi      | Glucose-6-phosphate isomerase                            | 1529.065 | 69.53 | 62767  | 39 | 0 | 0.88373383 | 0.002581 | 0              | 0              |
| P06761 | Hspa5    | Endoplasmic reticulum chaperone BiP                      | 1805.756 | 54.59 | 72347  | 39 | 0 | 1.2330325  | 0.018526 | 6.4139631E-185 | 3.6683803E-287 |
| P07091 | S100a4   | Protein S100-A4                                          | 293.402  | 51.49 | 11721  | 8  | 0 | 0.74607229 | 0.041148 | 1.1211458E-81  | 3.3760221E-129 |
| P07901 | Hsp90aa1 | Heat shock protein HSP 90-alpha                          | 1880.892 | 60.3  | 84788  | 51 | 0 | 1.12848265 | 0.038678 | 1.2818026E-91  | 2.3060817E-143 |
| P08003 | Pdia4    | Protein disulfide-isomerase A4                           | 868.491  | 44.04 | 71982  | 24 | 0 | 1.18278331 | 0.009488 | 3.8154148E-281 | 0              |
| P08101 | Fcgr2    | Low affinity immunoglobulin gamma Fc region receptor II  | 293.703  | 39.7  | 36695  | 9  | 0 | 0.77335257 | 0.014276 | 5.1273742E-217 | 0              |
| P08113 | Hsp90b1  | Endoplasmic                                              | 1785.373 | 54.49 | 92476  | 49 | 0 | 1.17504432 | 0.001754 | 0              | 0              |
| P08228 | Sod1     | Superoxide dismutase [Cu-Zn]                             | 173.22   | 34.42 | 15943  | 4  | 0 | 0.75623393 | 0.004489 | 0              | 0              |
| P08508 | Fcgr3    | Low affinity immunoglobulin gamma Fc region receptor III | 55.362   | 8.05  | 30036  | 2  | 0 | 0.721257   | 0.008063 | 5.4846854E-297 | 0              |
| P08752 | Gnai2    | Guanine nucleotide-binding protein G(i) subunit alpha-2  | 1256.755 | 69.86 | 40489  | 26 | 0 | 0.83641181 | 0.006731 | 1.9671421e-318 | 0              |
| P08775 | Polr2a   | DNA-directed RNA polymerase II subunit RPB1              | 350.364  | 7.41  | 217176 | 10 | 0 | 0.8373587  | 0.005977 | 0              | 0              |
| P09103 | P4hb     | Protein disulfide-isomerase                              | 1539.052 | 66.6  | 57058  | 38 | 0 | 1.33211212 | 0.005367 | 0              | 0              |
| P09528 | Fth1     | Ferritin heavy chain                                     | 222.436  | 41.21 | 21067  | 6  | 0 | 1.97155513 | 0.007657 | 1.0410799e-311 | 0              |
| P09581 | Csf1r    | Macrophage colony-stimulating factor 1 receptor          | 258.036  | 13    | 109179 | 11 | 0 | 0.70849846 | 0.005135 | 0              | 0              |
| P09671 | Sod2     | Superoxide dismutase [Mn], mitochondrial                 | 338.067  | 51.35 | 24603  | 8  | 0 | 1.3323457  | 0.016728 | 5.2250241E-197 | 7.40343e-308   |
| P0C0S6 | H2afz    | Histone H2A.Z                                            | 301.957  | 53.91 | 13553  | 6  | 0 | 1.11299771 | 0.04608  | 3.034856E-70   | 4.3544226E-113 |

|        |            |                                                                   |          |       |        |    |   |            |          |                |                |
|--------|------------|-------------------------------------------------------------------|----------|-------|--------|----|---|------------|----------|----------------|----------------|
| P0CC09 | Hist2h2aa3 | Histone H2A type 2-A                                              | 539.504  | 63.85 | 14095  | 11 | 0 | 1.08375735 | 0.042765 | 6.3904228E-78  | 7.0531385E-124 |
| P10126 | Eef1a1     | Elongation factor 1-alpha 1                                       | 1368.036 | 67.53 | 50114  | 40 | 0 | 1.09470744 | 0.019838 | 5.3753383E-179 | 3.2752178E-277 |
| P10605 | Ctsb       | Cathepsin B                                                       | 1041.968 | 69.32 | 37280  | 22 | 0 | 0.73515917 | 0.016096 | 4.4218731E-200 | 3.2756004E-313 |
| P10711 | Tcea1      | Transcription elongation factor A protein 1                       | 175.251  | 20.93 | 33880  | 4  | 0 | 0.58802858 | 0.097041 | 5.2105243E-10  | 3.9952221E-31  |
| P11030 | Dbi        | Acyl-CoA-binding protein                                          | 123.494  | 39.08 | 10027  | 2  | 0 | 0.63898258 | 0.058177 | 1.1703906E-48  | 1.2663725E-83  |
| P11103 | Parp1      | Poly [ADP-ribose] polymerase 1                                    | 499.094  | 19.94 | 113100 | 14 | 0 | 0.72860564 | 0.012682 | 5.025984E-226  | 0              |
| P11499 | Hsp90ab1   | Heat shock protein HSP 90-beta                                    | 1898.325 | 58.01 | 83281  | 49 | 0 | 1.11023126 | 0.036697 | 1.9280103E-103 | 2.0578361E-160 |
| P11506 | Atp2b2     | Plasma membrane calcium-transporting ATPase 2                     | 135.354  | 5.63  | 136811 | 6  | 0 | 1.53222942 | 0.017223 | 9.6802208E-193 | 1.7463861E-300 |
| P11598 | Pdia3      | Protein disulfide-isomerase A3                                    | 945.818  | 52.28 | 56623  | 26 | 0 | 1.13792224 | 0.007943 | 5.3253421E-308 | 0              |
| P11688 | Itga5      | Integrin alpha-5                                                  | 144.39   | 8.64  | 115043 | 8  | 0 | 1.37739716 | 0.039706 | 2.0452251E-89  | 3.2164616E-140 |
| P11730 | Camk2g     | Calcium/calmodulin-dependent protein kinase type II subunit gamma | 105.492  | 8.92  | 59038  | 4  | 0 | 0.87805961 | 0.041279 | 5.3499752E-80  | 8.1445146E-127 |
| P11835 | Itgb2      | Integrin beta-2                                                   | 1205.242 | 41.76 | 85026  | 25 | 0 | 0.8640331  | 0.008574 | 7.30108E-287   | 0              |
| P12001 | Rpl18      | 60S ribosomal protein L18                                         | 125.06   | 22.34 | 21659  | 5  | 0 | 1.55549103 | 0.010109 | 9.2429203E-268 | 0              |
| P12265 | Gusb       | Beta-glucuronidase                                                | 922.641  | 47.69 | 74195  | 24 | 0 | 0.69189001 | 0.014663 | 1.1217639E-210 | 0              |
| P12815 | Pdcd6      | Programmed cell death protein 6                                   | 164.125  | 42.41 | 21867  | 4  | 0 | 0.81598601 | 0.014254 | 1.1790799E-217 | 0              |
| P13020 | Gsn        | Gelsolin                                                          | 1819.541 | 61.03 | 85942  | 44 | 0 | 0.73387199 | 0.001754 | 0              | 0              |
| P14069 | S100a6     | Protein S100-A6                                                   | 189.18   | 78.65 | 10051  | 6  | 0 | 0.63064077 | 0.005135 | 0              | 0              |
| P14115 | Rpl27a     | 60S ribosomal protein L27a                                        | 165.384  | 22.3  | 16605  | 4  | 0 | 1.17762372 | 0.016096 | 2.5763983E-201 | 2.2744158E-315 |
| P14131 | Rps16      | 40S ribosomal protein S16                                         | 263.487  | 52.05 | 16445  | 10 | 0 | 1.14364855 | 0.008078 | 9.6825185E-290 | 0              |
| P14148 | Rpl7       | 60S ribosomal protein L7                                          | 220.793  | 31.48 | 31420  | 8  | 0 | 2.19264458 | 0.002645 | 0              | 0              |
| P14152 | Mdh1       | Malate dehydrogenase, cytoplasmic                                 | 618.435  | 47.6  | 36511  | 13 | 0 | 0.8610661  | 0.001754 | 0              | 0              |
| P14206 | Rpsa       | 40S ribosomal protein SA                                          | 721.327  | 57.63 | 32838  | 16 | 0 | 0.77006492 | 0.006427 | 6.1857019E-320 | 0              |
| P14211 | Calr       | Calreticulin                                                      | 725.785  | 58.41 | 47995  | 23 | 0 | 1.13393898 | 0.010214 | 2.766416E-264  | 0              |

|        |          |                                                              |          |       |        |    |   |            |          |                |                |
|--------|----------|--------------------------------------------------------------|----------|-------|--------|----|---|------------|----------|----------------|----------------|
| P14685 | Psmc3    | 26S proteasome non-ATPase regulatory subunit 3               | 410.713  | 25.66 | 60718  | 11 | 0 | 1.12571745 | 0.033915 | 1.9615411E-113 | 5.5276351E-175 |
| P14733 | Lmnb1    | Lamin-B1                                                     | 1089.586 | 57.99 | 66786  | 32 | 0 | 0.87205419 | 0.002232 | 0              | 0              |
| P15702 | Spn      | Leukosialin                                                  | 103.556  | 9.62  | 40038  | 2  | 0 | 2.15663744 | 0.059338 | 5.4773405E-48  | 9.9830246E-83  |
| P15864 | Hist1h1c | Histone H1.2                                                 | 41.584   | 16.04 | 21267  | 3  | 0 | 1.63581744 | 0.127722 | 0.17942049     | 6.7073405E-15  |
| P16045 | Lgals1   | Galectin-1                                                   | 739.544  | 94.81 | 14866  | 15 | 0 | 0.74552845 | 0.04527  | 4.9017272E-71  | 3.4216834E-114 |
| P16110 | Lgals3   | Galectin-3                                                   | 576.284  | 30.68 | 27515  | 12 | 0 | 0.67572795 | 0.0147   | 2.0341904E-209 | 0              |
| P16446 | Pitpna   | Phosphatidylinositol transfer protein alpha isoform          | 125.049  | 40.96 | 31907  | 8  | 0 | 0.71887062 | 0.002897 | 0              | 0              |
| P16460 | Ass1     | Argininosuccinate synthase                                   | 229.08   | 26.21 | 46584  | 10 | 0 | 6.50898018 | 0.00966  | 2.6440654E-278 | 0              |
| P16546 | Sptan1   | Spectrin alpha chain, non-erythrocytic 1                     | 408.587  | 7.2   | 284597 | 13 | 0 | 0.75374462 | 0.024136 | 2.7928663E-162 | 6.254734E-250  |
| P16675 | Ctsa     | Lysosomal protective protein                                 | 740.128  | 35.65 | 53844  | 18 | 0 | 0.79336391 | 0.012716 | 1.9537882E-223 | 0              |
| P17078 | Rpl35    | 60S ribosomal protein L35                                    | 42.539   | 18.7  | 14553  | 2  | 0 | 2.04972731 | 0.0034   | 0              | 0              |
| P17182 | Eno1     | Alpha-enolase                                                | 1915.87  | 79.26 | 47141  | 40 | 0 | 0.88935395 | 0.010593 | 2.7287213E-253 | 0              |
| P17225 | Ptbp1    | Polypyrimidine tract-binding protein 1                       | 1128.374 | 66.98 | 56478  | 21 | 0 | 0.83076123 | 0.042795 | 1.0977251E-76  | 3.8685187E-122 |
| P17742 | Ppia     | Peptidyl-prolyl cis-trans isomerase A                        | 1008.804 | 71.34 | 17971  | 20 | 0 | 0.7955285  | 0.001905 | 0              | 0              |
| P18242 | Ctsd     | Cathepsin D                                                  | 859.885  | 54.39 | 44954  | 24 | 0 | 0.71539651 | 0.033979 | 1.6831324E-111 | 3.8133636E-172 |
| P18572 | Bsg      | Basigin                                                      | 59.597   | 9.77  | 42445  | 3  | 0 | 1.2433021  | 0.02442  | 8.616213E-158  | 8.0294103E-243 |
| P18760 | Cfl1     | Cofilin-1                                                    | 690.857  | 73.49 | 18560  | 14 | 0 | 0.79858187 | 0.02063  | 6.7344247E-175 | 2.0354326E-270 |
| P19096 | Fasn     | Fatty acid synthase                                          | 3301.881 | 53.55 | 272428 | 87 | 0 | 0.8832528  | 0.022455 | 5.7549382E-168 | 4.558205E-259  |
| P19253 | Rpl13a   | 60S ribosomal protein L13a                                   | 144.874  | 27.59 | 23464  | 6  | 0 | 1.38421736 | 0.001628 | 0              | 0              |
| P19783 | Cox4i1   | Cytochrome c oxidase subunit 4 isoform 1, mitochondrial      | 181.422  | 30.77 | 19530  | 5  | 0 | 1.10709563 | 0.018274 | 6.5328044E-188 | 3.1068274E-292 |
| P19973 | Lsp1     | Lymphocyte-specific protein 1                                | 598.308  | 46.06 | 36714  | 12 | 0 | 0.73542697 | 0.014663 | 4.7812723E-210 | 0              |
| P20060 | Hexb     | Beta-hexosaminidase subunit beta                             | 453.303  | 38.06 | 61116  | 16 | 0 | 0.76276347 | 0.033979 | 5.547066E-112  | 7.471955E-173  |
| P20108 | Prdx3    | Thioredoxin-dependent peroxide reductase, mitochondrial Prx3 | 201.247  | 42.8  | 28127  | 8  | 0 | 1.15747552 | 0.018046 | 1.0237401E-189 | 2.6565419E-295 |
| P21575 | Dnm1     | Dynamin-1                                                    | 42.89    | 3.94  | 97295  | 4  | 0 | 1.12425483 | 0.004809 | 0              | 0              |

|        |        |                                                            |          |       |        |     |   |            |          |                |                |
|--------|--------|------------------------------------------------------------|----------|-------|--------|-----|---|------------|----------|----------------|----------------|
| P23198 | Cbx3   | Chromobox protein homolog 3                                | 366.566  | 42.62 | 20855  | 7   | 0 | 0.82238848 | 0.028962 | 1.4025549E-134 | 1.1303804E-206 |
| P24051 | Rps27l | 40S ribosomal protein S27-like                             | 146.25   | 25    | 9477   | 3   | 0 | 0.85140594 | 0.018984 | 1.5352435E-182 | 3.8127704E-283 |
| P24270 | Cat    | Catalase                                                   | 342.177  | 24.1  | 59795  | 9   | 0 | 1.20464178 | 0.010474 | 1.1817281E-254 | 0              |
| P24369 | Ppib   | Peptidyl-prolyl cis-trans isomerase B                      | 393.827  | 43.06 | 23713  | 11  | 0 | 1.09790244 | 0.042049 | 1.3985353E-79  | 3.1879681E-126 |
| P24452 | Capg   | Macrophage-capping protein                                 | 858.851  | 52.56 | 39240  | 17  | 0 | 0.83609508 | 0.003961 | 0              | 0              |
| P25113 | Pgam1  | Phosphoglycerate mutase 1                                  | 1015.485 | 74.02 | 28832  | 21  | 0 | 0.83022014 | 0.039706 | 1.5327178E-88  | 5.6623196E-139 |
| P25976 | Ubtf   | Nucleolar transcription factor 1                           | 64.217   | 6.54  | 89509  | 4   | 0 | 0.80211235 | 0.020325 | 4.587242E-176  | 2.400759E-272  |
| P26039 | Tln1   | Talin-1                                                    | 5661.689 | 64.62 | 269821 | 120 | 0 | 0.92799632 | 0.081312 | 1.1775164E-20  | 2.3681193E-46  |
| P26883 | Fkbp1a | Peptidyl-prolyl cis-trans isomerase FKBP1A                 | 125.15   | 25    | 11923  | 2   | 0 | 0.73125356 | 0.010816 | 6.7766544E-250 | 0              |
| P27008 | Parp1  | Poly [ADP-ribose] polymerase 1                             | 679.782  | 24.85 | 112660 | 16  | 0 | 0.75362268 | 0.024636 | 1.4454916E-155 | 2.6702606E-239 |
| P27659 | Rpl3   | 60S ribosomal protein L3                                   | 722.272  | 44.42 | 46110  | 23  | 0 | 1.23045443 | 0.007943 | 9.6847911E-309 | 0              |
| P27661 | H2afx  | Histone H2AX                                               | 358.821  | 52.45 | 15143  | 7   | 0 | 1.11648757 | 0.046927 | 6.8285766E-68  | 7.9071518E-110 |
| P27773 | Pdia3  | Protein disulfide-isomerase A3                             | 1310.895 | 67.33 | 56678  | 34  | 0 | 1.09864325 | 0.005541 | 0              | 0              |
| P29066 | Arrb1  | Beta-arrestin-1                                            | 207.183  | 21.77 | 47020  | 7   | 0 | 0.84166995 | 0.010878 | 1.5262062E-248 | 0              |
| P29351 | Ptpn6  | Tyrosine-protein phosphatase non-receptor type 6           | 1259.199 | 70.42 | 67559  | 36  | 0 | 1.21026869 | 0.018291 | 2.6008886E-187 | 3.2429935E-291 |
| P29391 | Ftl1   | Ferritin light chain 1                                     | 365.894  | 55.74 | 20802  | 7   | 0 | 1.62070185 | 0.018701 | 2.5299075E-184 | 3.7383743E-286 |
| P29758 | Oat    | Ornithine aminotransferase, mitochondrial                  | 625.5    | 51.94 | 48355  | 17  | 0 | 1.26763319 | 0.002581 | 0              | 0              |
| P30681 | Hmgb2  | High mobility group protein B2                             | 399.936  | 29.05 | 24162  | 10  | 0 | 0.72365943 | 0.000398 | 0              | 0              |
| P30993 | C5ar1  | C5a anaphylatoxin chemotactic receptor 1                   | 103.201  | 11.68 | 39023  | 4   | 0 | 0.74919896 | 0.006427 | 0              | 0              |
| P31938 | Map2k1 | Dual specificity mitogen-activated protein kinase kinase 1 | 480.979  | 39.95 | 43474  | 11  | 0 | 0.84707131 | 0.039396 | 9.8117821E-91  | 4.2463805E-142 |
| P32020 | Scp2   | Non-specific lipid-transfer protein                        | 78.683   | 5.3   | 59126  | 3   | 0 | 0.71911348 | 0.036655 | 6.5794893E-104 | 4.3580767E-161 |



|        |        |                                                                              |          |       |       |    |   |            |          |                |                |
|--------|--------|------------------------------------------------------------------------------|----------|-------|-------|----|---|------------|----------|----------------|----------------|
| P32577 | Csk    | Tyrosine-protein kinase CSK                                                  | 379.565  | 33.56 | 50746 | 12 | 0 | 0.90721345 | 0.017745 | 6.3516139E-191 | 2.3061935E-297 |
| P34884 | Mif    | Macrophage migration inhibitory factor                                       | 364.546  | 71.3  | 12504 | 8  | 0 | 0.71538462 | 0.01119  | 7.9435728E-242 | 0              |
| P34960 | Mmp12  | Macrophage metalloelastase                                                   | 124.013  | 12.26 | 54971 | 5  | 0 | 1.74335443 | 0.008524 | 1.3969525E-287 | 0              |
| P35293 | Rab18  | Ras-related protein Rab-18                                                   | 80.318   | 18.93 | 23035 | 3  | 0 | 1.4985006  | 0.005465 | 0              | 0              |
| P35564 | Canx   | Calnexin                                                                     | 771.865  | 29.1  | 67278 | 17 | 0 | 1.23001742 | 0.001188 | 0              | 0              |
| P35700 | Prdx1  | Peroxiredoxin-1                                                              | 593.265  | 64.82 | 22176 | 20 | 0 | 1.15915024 | 0.001754 | 0              | 0              |
| P36552 | Cpox   | Oxygen-dependent coproporphyrinogen-III oxidase, mitochondrial               | 58.206   | 7.45  | 49715 | 2  | 0 | 0.67622473 | 0.032052 | 2.5968408E-120 | 3.86946E-185   |
| P38060 | Hmgcl  | Hydroxymethylglutaryl-CoA lyase, mitochondrial                               | 443.427  | 42.46 | 34239 | 10 | 0 | 0.81981376 | 0.026623 | 3.5050503E-145 | 5.3404203E-223 |
| P38647 | Hspa9  | Stress-70 protein, mitochondrial                                             | 1481.185 | 53.31 | 73461 | 32 | 0 | 1.26373687 | 0.027703 | 8.8470931E-139 | 4.2233638E-213 |
| P40124 | Cap1   | Adenylyl cyclase-associated protein 1                                        | 1729.781 | 73.42 | 51565 | 40 | 0 | 0.80410376 | 0.002646 | 0              | 0              |
| P41105 | Rpl28  | 60S ribosomal protein L28                                                    | 142.453  | 39.42 | 15733 | 6  | 0 | 1.20822692 | 0.01968  | 3.5665409E-180 | 3.5661251E-279 |
| P41123 | Rpl13  | 60S ribosomal protein L13                                                    | 166.598  | 28.44 | 24309 | 6  | 0 | 1.4788861  | 0.010214 | 1.1318334E-265 | 0              |
| P41216 | Acs11  | Long-chain-fatty-acid--CoA ligase 1                                          | 279.735  | 22.46 | 77951 | 14 | 0 | 1.19771273 | 0.033979 | 5.9882813E-113 | 2.8464704E-174 |
| P42082 | Cd86   | T-lymphocyte activation antigen CD86                                         | 79.02    | 10.68 | 34666 | 3  | 0 | 1.22754843 | 0.011436 | 7.5548813E-236 | 0              |
| P42667 | Sec11a | Signal peptidase complex catalytic subunit SEC11A                            | 70.665   | 16.2  | 20599 | 4  | 0 | 1.2643091  | 0.001754 | 0              | 0              |
| P43883 | Plin2  | Perilipin-2                                                                  | 41.644   | 6.35  | 46646 | 2  | 0 | 3.39576324 | 0.083273 | 5.5821718E-20  | 2.0220204E-45  |
| P45376 | Akr1b1 | Aldose reductase                                                             | 575.159  | 56.65 | 35732 | 20 | 0 | 0.88181047 | 0.008576 | 3.8091621E-286 | 0              |
| P46978 | Stt3a  | Dolichyl-diphosphooligosaccharide--protein glycosyltransferase subunit STT3A | 246.339  | 18.44 | 80598 | 11 | 0 | 1.20627168 | 0.010807 | 6.2561212E-252 | 0              |

|        |         |                                                           |          |       |       |    |   |            |          |                |                |
|--------|---------|-----------------------------------------------------------|----------|-------|-------|----|---|------------|----------|----------------|----------------|
| P47753 | Capza1  | F-actin-capping protein subunit alpha-1                   | 366.653  | 55.94 | 32940 | 11 | 0 | 0.90437112 | 0.015006 | 4.8760759E-205 | 5.9781943e-322 |
| P47754 | Capza2  | F-actin-capping protein subunit alpha-2                   | 660.331  | 70.28 | 32967 | 14 | 0 | 0.89958584 | 0.040894 | 1.6020949E-82  | 2.133256E-130  |
| P47757 | Capzb   | F-actin-capping protein subunit beta                      | 867.592  | 66.79 | 31345 | 21 | 0 | 0.76325169 | 0.008063 | 1.9083243E-298 | 0              |
| P47911 | Rpl6    | 60S ribosomal protein L6                                  | 224.616  | 24.32 | 33510 | 7  | 0 | 2.34611915 | 0.00277  | 0              | 0              |
| P48036 | Anxa5   | Annexin A5                                                | 1571.408 | 83.39 | 35752 | 38 | 0 | 1.09533771 | 0.026404 | 1.0131883E-145 | 7.7507253E-224 |
| P48441 | Idua    | Alpha-L-iduronidase                                       | 73.994   | 3.31  | 71254 | 2  | 0 | 0.75673042 | 0.024638 | 5.177361E-155  | 2.0068537E-238 |
| P48758 | Cbr1    | Carbonyl reductase [NADPH] 1                              | 110.481  | 25.99 | 30641 | 4  | 0 | 0.65104702 | 0.052965 | 6.0782462E-56  | 1.7340564E-93  |
| P48962 | Slc25a4 | ADP/ATP translocase 1                                     | 705.604  | 58.39 | 32904 | 22 | 0 | 1.17674934 | 0.010549 | 5.6836222E-254 | 0              |
| P49717 | Mcm4    | DNA replication licensing factor MCM4                     | 823.128  | 32.48 | 96736 | 22 | 0 | 0.80365756 | 0.001905 | 0              | 0              |
| P50247 | Ahcy    | Adenosylhomocysteinase                                    | 813.817  | 58.33 | 47688 | 23 | 0 | 0.87297604 | 0.00318  | 0              | 0              |
| P50396 | Gdi1    | Rab GDP dissociation inhibitor alpha                      | 659.795  | 46.31 | 50522 | 16 | 0 | 0.71990621 | 0.122148 | 0.043881312    | 1.2164954E-16  |
| P50399 | Gdi2    | Rab GDP dissociation inhibitor beta                       | 1482.039 | 80    | 50537 | 37 | 0 | 0.83150433 | 0.021369 | 7.6941925E-171 | 9.3650834E-264 |
| P50429 | Arsb    | Arylsulfatase B                                           | 484.17   | 37.83 | 59647 | 14 | 0 | 0.53141643 | 0.002645 | 0              | 0              |
| P50543 | S100a11 | Protein S100-A11                                          | 164.439  | 71.43 | 11083 | 4  | 0 | 0.69434345 | 0.0147   | 3.6618863E-208 | 0              |
| P51174 | Acadl   | Long-chain specific acyl-CoA dehydrogenase, mitochondrial | 859.062  | 52.09 | 47908 | 20 | 0 | 1.11623109 | 0.026044 | 2.4189286E-147 | 2.2914015E-226 |
| P51569 | Gla     | Alpha-galactosidase A                                     | 333.553  | 26.25 | 47643 | 9  | 0 | 0.68351814 | 0.008063 | 4.1792951E-302 | 0              |
| P51859 | Hdgf    | Hepatoma-derived growth factor                            | 165.045  | 31.22 | 26269 | 7  | 0 | 0.71447577 | 0.010807 | 1.3077335E-252 | 0              |
| P51881 | Slc25a5 | ADP/ATP translocase 2                                     | 804.91   | 58.72 | 32931 | 23 | 0 | 1.21865417 | 0.004574 | 0              | 0              |
| P52293 | Kpna2   | Importin subunit alpha-1                                  | 562.347  | 37.05 | 57928 | 10 | 0 | 1.23022806 | 0.019505 | 9.1611116E-181 | 3.6776048E-280 |
| P52875 | Tmem165 | Transmembrane protein 165                                 | 69.156   | 13.62 | 34791 | 2  | 0 | 1.30791907 | 0.029029 | 4.6568713E-134 | 7.0190038E-206 |

|        |         |                                                    |          |       |       |    |   |            |          |                |                |
|--------|---------|----------------------------------------------------|----------|-------|-------|----|---|------------|----------|----------------|----------------|
| P53811 | Pitpnb  | Phosphatidylinositol transfer protein beta isoform | 114.69   | 34.69 | 31487 | 7  | 0 | 0.80690335 | 0.001974 | 0              | 0              |
| P53986 | Slc16a1 | Monocarboxylate transporter 1                      | 98.015   | 6.49  | 53267 | 3  | 0 | 1.57531638 | 0.147048 | 1              | 4.4458464E-07  |
| P54116 | Stom    | Erythrocyte band 7 integral membrane protein       | 430.834  | 47.18 | 31375 | 11 | 0 | 0.61535642 | 0.227397 | 1              | 0.99976338     |
| P54822 | Adsl    | Adenylosuccinate lyase                             | 453.506  | 35.12 | 54866 | 11 | 0 | 0.82958046 | 0.01382  | 2.7064606E-218 | 0              |
| P55264 | Adk     | Adenosine kinase                                   | 112.439  | 13.57 | 40149 | 4  | 0 | 0.77204533 | 0.080352 | 6.9714041E-21  | 1.1489478E-46  |
| P55302 | Lrpap1  | Alpha-2-macroglobulin receptor-associated protein  | 230.143  | 22.5  | 42215 | 7  | 0 | 1.30585562 | 0.004996 | 0              | 0              |
| P56135 | Atp5mf  | ATP synthase subunit f, mitochondrial              | 50.03    | 34.09 | 10344 | 4  | 0 | 1.22139303 | 0.008063 | 2.9326536E-296 | 0              |
| P56959 | Fus     | RNA-binding protein FUS                            | 350.781  | 22.2  | 52673 | 10 | 0 | 0.87144626 | 0.006261 | 0              | 0              |
| P57716 | Ncstn   | Nicastrin                                          | 174.822  | 12.01 | 78492 | 6  | 0 | 1.26846882 | 0.006427 | 1.0938613e-320 | 0              |
| P58389 | Ptpa    | Serine/threonine-protein phosphatase 2A activator  | 250.352  | 36.53 | 36710 | 8  | 0 | 0.7189622  | 0.02442  | 4.9810084E-160 | 2.3144257E-246 |
| P59017 | Bcl2l13 | Bcl-2-like protein 13                              | 170.758  | 15.9  | 46719 | 4  | 0 | 0.33969098 | 0.070372 | 1.8252184E-35  | 3.8344508E-66  |
| P59325 | Eif5    | Eukaryotic translation initiation factor 5         | 111.347  | 7.46  | 48968 | 4  | 0 | 0.81931174 | 0.010913 | 1.6702475E-244 | 0              |
| P60335 | Pcbp1   | Poly(rC)-binding protein 1                         | 636.305  | 63.48 | 37498 | 14 | 0 | 0.8725778  | 0.04313  | 4.7187444E-75  | 7.7383729E-120 |
| P60710 | Actb    | Actin, cytoplasmic 1                               | 3245.62  | 90.93 | 41737 | 62 | 0 | 1.06002161 | 0.054418 | 2.03509E-52    | 1.0969394E-88  |
| P60766 | Cdc42   | Cell division control protein 42 homolog           | 384.278  | 58.12 | 21259 | 9  | 0 | 0.82556444 | 0.039706 | 2.2703259E-86  | 7.0557667E-136 |
| P60843 | Eif4a1  | Eukaryotic initiation factor 4A-I                  | 1018.101 | 54.93 | 46154 | 24 | 0 | 1.25857338 | 0.008078 | 5.0872379E-289 | 0              |
| P60867 | Rps20   | 40S ribosomal protein S20                          | 130.94   | 28.57 | 13373 | 4  | 0 | 0.85008882 | 0.00274  | 0              | 0              |
| P61161 | Actr2   | Actin-related protein 2                            | 1171.859 | 58.38 | 44761 | 26 | 0 | 0.86873201 | 0.007943 | 1.6017244E-306 | 0              |
| P61211 | Arl1    | ADP-ribosylation factor-like protein 1             | 127.795  | 19.89 | 20412 | 3  | 0 | 1.29382878 | 0.008063 | 3.5502754E-299 | 0              |
| P61314 | Rpl15   | 60S ribosomal protein L15                          | 216.757  | 38.73 | 24146 | 8  | 0 | 1.53441236 | 0.001974 | 0              | 0              |
| P61354 | Rpl27   | 60S ribosomal protein L27                          | 150.104  | 36.03 | 15798 | 5  | 0 | 1.2454984  | 0.006115 | 0              | 0              |

|        |        |                                                                   |          |       |       |    |   |            |          |                |                |
|--------|--------|-------------------------------------------------------------------|----------|-------|-------|----|---|------------|----------|----------------|----------------|
| P61971 | Nutf2  | Nuclear transport factor 2                                        | 149.849  | 71.65 | 14478 | 4  | 0 | 0.5349008  | 0.014663 | 2.6270356E-211 | 0              |
| P61979 | Hnrnpk | Heterogeneous nuclear ribonucleoprotein K                         | 846.419  | 50.76 | 50976 | 21 | 0 | 0.88000571 | 0.037005 | 4.0385336E-101 | 4.6122606E-157 |
| P62242 | Rps8   | 40S ribosomal protein S8                                          | 343.425  | 45.67 | 24205 | 8  | 0 | 1.57592642 | 0.008063 | 1.023958E-297  | 0              |
| P62267 | Rps23  | 40S ribosomal protein S23                                         | 229.807  | 42.66 | 15808 | 5  | 0 | 1.17465397 | 0.010099 | 9.0356385E-275 | 0              |
| P62702 | Rps4x  | 40S ribosomal protein S4, X isoform                               | 648.212  | 53.23 | 29598 | 17 | 0 | 1.10950181 | 0.008052 | 7.7075176E-303 | 0              |
| P62751 | Rpl23a | 60S ribosomal protein L23a                                        | 84.407   | 24.36 | 17695 | 3  | 0 | 1.42881343 | 0.019086 | 2.3487487E-181 | 3.7385879E-281 |
| P62774 | Mtpn   | Myotrophin                                                        | 279.736  | 75.42 | 12861 | 5  | 0 | 0.69862956 | 0.039706 | 3.0946763E-87  | 4.1075381E-137 |
| P62830 | Rpl23  | 60S ribosomal protein L23                                         | 191.96   | 50    | 14865 | 7  | 0 | 0.92280147 | 0.01319  | 3.8105351E-222 | 0              |
| P62855 | Rps26  | 40S ribosomal protein S26                                         | 110.364  | 31.3  | 13015 | 3  | 0 | 1.10491249 | 0.010214 | 1.6178783E-261 | 0              |
| P62908 | Rps3   | 40S ribosomal protein S3                                          | 525.947  | 70.78 | 26674 | 19 | 0 | 1.12332808 | 0.018291 | 1.0335605E-186 | 3.3702047E-290 |
| P62918 | Rpl8   | 60S ribosomal protein L8                                          | 246.047  | 45.14 | 28025 | 11 | 0 | 1.24937443 | 0.005465 | 0              | 0              |
| P63001 | Rac1   | Ras-related C3 botulinum toxin substrate 1                        | 404.337  | 54.17 | 21450 | 9  | 0 | 0.76942349 | 0.01119  | 1.7138145E-240 | 0              |
| P63024 | Vamp3  | Vesicle-associated membrane protein 3                             | 185.691  | 54.37 | 11480 | 3  | 0 | 0.69577243 | 0.012552 | 1.2560175E-228 | 0              |
| P63038 | Hspd1  | 60 kDa heat shock protein, mitochondrial                          | 2093.763 | 71.38 | 60955 | 46 | 0 | 1.12524427 | 0.006313 | 0              | 0              |
| P63087 | Ppp1cc | Serine/threonine-protein phosphatase PP1-gamma catalytic subunit  | 538.526  | 44.58 | 36984 | 11 | 0 | 0.84074336 | 0.030596 | 8.1495432E-124 | 2.2113395E-190 |
| P63158 | Hmgb1  | High mobility group protein B1                                    | 259.891  | 35.81 | 24894 | 9  | 0 | 0.73703062 | 0.006427 | 9.8813129e-324 | 0              |
| P63213 | Gng2   | Guanine nucleotide-binding protein G(I)/G(S)/G(O) subunit gamma-2 | 99.828   | 49.3  | 7850  | 3  | 0 | 0.72270714 | 0.010913 | 3.6555619E-243 | 0              |
| P63259 | Actg1  | Actin, cytoplasmic 2                                              | 3229.127 | 90.93 | 41793 | 61 | 0 | 1.06162827 | 0.052867 | 5.0895425E-57  | 5.9729905E-95  |

|        |         |                                                                            |          |       |        |    |   |            |          |                |                |
|--------|---------|----------------------------------------------------------------------------|----------|-------|--------|----|---|------------|----------|----------------|----------------|
| P63328 | Ppp3ca  | Serine/threonine-protein phosphatase 2B catalytic subunit alpha isoform    | 225.344  | 23.22 | 58644  | 9  | 0 | 0.8474695  | 0.016394 | 3.1009702E-198 | 5.482952e-310  |
| P67778 | Phb     | Prohibitin                                                                 | 743.077  | 79.04 | 29820  | 18 | 0 | 1.12395878 | 0.04313  | 7.2287157E-76  | 5.5170974E-121 |
| P68037 | Ube2l3  | Ubiquitin-conjugating enzyme E2 L3                                         | 192.778  | 51.95 | 17862  | 4  | 0 | 0.83694926 | 0.009488 | 1.9627815E-280 | 0              |
| P68101 | Eif2s1  | Eukaryotic translation initiation factor 2 subunit 1                       | 535.04   | 54.6  | 36108  | 15 | 0 | 0.88157769 | 0.092764 | 2.3137217E-12  | 1.1284038E-34  |
| P68372 | Tubb4b  | Tubulin beta-4B chain                                                      | 2065.138 | 82.92 | 49831  | 45 | 0 | 0.86134606 | 0.010816 | 1.4241426E-250 | 0              |
| P69897 | Tubb5   | Tubulin beta-5 chain                                                       | 2252.156 | 83.11 | 49671  | 46 | 0 | 0.86381007 | 0.010214 | 6.7138646E-263 | 0              |
| P70158 | Smpdl3a | sphingomyelinase-like phosphodiesterase 3a                                 | 75.152   | 8.99  | 49858  | 2  | 0 | 0.51911478 | 0.021369 | 2.9012205E-170 | 8.1976948E-263 |
| P70168 | Kpnb1   | Reportin subunit beta-1                                                    | 1005.834 | 39.84 | 97184  | 26 | 0 | 0.87036258 | 0.032457 | 2.555936E-119  | 1.1596862E-183 |
| P70206 | Plxna1  | Plexin-A1                                                                  | 150.334  | 3.59  | 211099 | 6  | 0 | 1.25898111 | 0.025399 | 5.6752531E-149 | 6.3688984E-229 |
| P70315 | Was     | Wiskott-Aldrich syndrome protein homolog                                   | 167.146  | 14.04 | 54192  | 4  | 0 | 0.75906982 | 0.037867 | 2.1328609E-93  | 6.3909443E-146 |
| P70340 | Smad1   | Mothers against decapentaplegic homolog 1                                  | 42.288   | 8.17  | 52157  | 2  | 0 | 0.66080207 | 0.008034 | 1.4189492E-303 | 0              |
| P70665 | Siae    | Sialate O-acetyltransferase                                                | 82.931   | 7.39  | 60775  | 3  | 0 | 0.67495208 | 0.001905 | 0              | 0              |
| P70670 | Naca    | Nascent polypeptide-associated complex subunit alpha, muscle-specific form | 297.931  | 3.2   | 220499 | 6  | 0 | 1.18116453 | 0.037231 | 1.8755128E-97  | 8.9387935E-152 |
| P80317 | Cct6a   | T-complex protein 1 subunit zeta                                           | 846.636  | 56.12 | 58004  | 24 | 0 | 1.1009306  | 0.024871 | 6.6037752E-154 | 1.1218333E-236 |
| P81155 | Vdac2   | Voltage-dependent anion-selective channel protein 2                        | 562.666  | 50.51 | 31746  | 12 | 0 | 1.31038855 | 0.003833 | 0              | 0              |
| P83732 | Rpl24   | 60S ribosomal protein L24                                                  | 113.715  | 24.2  | 17779  | 4  | 0 | 1.52791466 | 0.007992 | 2.6077153E-304 | 0              |
| P83870 | Phf5a   | PHD finger-like domain-containing protein 5A                               | 32.466   | 21.82 | 12405  | 2  | 0 | 0.43978365 | 0.100378 | 3.13338E-09    | 6.3291479E-30  |
| P83917 | Cbx1    | Chromobox protein homolog 1                                                | 135.822  | 18.92 | 21418  | 3  | 0 | 0.79687447 | 0.007992 | 8.7613389E-306 | 0              |
| P83940 | Eloc    | Elongin-C                                                                  | 181.167  | 37.5  | 12473  | 3  | 0 | 0.74995964 | 0.005367 | 0              | 0              |

|        |          |                                                                        |          |       |        |    |   |            |          |                |                |
|--------|----------|------------------------------------------------------------------------|----------|-------|--------|----|---|------------|----------|----------------|----------------|
| P84099 | Rpl19    | 60S ribosomal protein L19                                              | 89.065   | 13.27 | 23466  | 2  | 0 | 2.09790193 | 0.003833 | 0              | 0              |
| P85108 | Tubb2a   | Tubulin beta-2A chain                                                  | 1611.259 | 58.2  | 49907  | 36 | 0 | 0.85574711 | 0.01245  | 1.3774954E-230 | 0              |
| P97429 | Anxa4    | Annexin A4                                                             | 866.33   | 67.71 | 35916  | 20 | 0 | 1.37702407 | 0.003303 | 0              | 0              |
| P97821 | Ctsc     | Dipeptidyl peptidase 1                                                 | 238.605  | 18.18 | 52376  | 7  | 0 | 0.6424995  | 0.002645 | 0              | 0              |
| P99026 | Psmb4    | Proteasome subunit beta type-4                                         | 360.035  | 40.91 | 29116  | 9  | 0 | 0.88372202 | 0.025363 | 1.0498757E-151 | 3.2901466E-233 |
| P99029 | Prdx5    | Peroxiredoxin-5, mitochondrial                                         | 406.2    | 56.67 | 21897  | 11 | 0 | 0.75888946 | 0.02442  | 1.8115994E-159 | 1.7821644E-245 |
| Q00519 | Xdh      | Xanthine dehydrogenase/oxidase                                         | 800.625  | 23.52 | 146562 | 19 | 0 | 0.87936125 | 0.078196 | 9.5452171E-23  | 3.2019321E-49  |
| Q00612 | G6pdx    | Glucose-6-phosphate 1-dehydrogenase X                                  | 931.64   | 55.92 | 59263  | 28 | 0 | 1.15374874 | 0.03319  | 7.4991131E-117 | 5.1994323E-180 |
| Q01405 | Sec23a   | Protein transport protein Sec23A                                       | 135.088  | 7.32  | 86162  | 4  | 0 | 0.56969317 | 0.137788 | 1              | 1.2669836E-10  |
| Q01730 | Rsu1     | Ras suppressor protein 1                                               | 225.544  | 37.18 | 31550  | 7  | 0 | 0.83681699 | 0.017018 | 1.4509335E-194 | 1.2496147E-303 |
| Q03265 | Atp5f1a  | ATP synthase subunit alpha, mitochondrial                              | 1612.934 | 62.39 | 59753  | 35 | 0 | 1.1011114  | 0.020325 | 1.1938586E-176 | 2.5903655E-273 |
| Q04447 | Ckb      | Creatine kinase B-type                                                 | 1299.978 | 64.04 | 42713  | 23 | 0 | 0.87382301 | 0.006381 | 0              | 0              |
| Q04750 | Top1     | DNA topoisomerase 1                                                    | 324.79   | 22.69 | 90876  | 14 | 0 | 0.64629325 | 0.002565 | 0              | 0              |
| Q04899 | Cdk18    | Cyclin-dependent kinase 18                                             | 112.94   | 10.64 | 51848  | 4  | 0 | 1.81107392 | 0.001851 | 0              | 0              |
| Q06138 | Cab39    | Calcium-binding protein 39                                             | 276.569  | 24.63 | 39843  | 9  | 0 | 1.21865246 | 0.01245  | 2.7956175E-229 | 0              |
| Q09014 | Ncf1     | Neutrophil cytosol factor 1                                            | 176.654  | 15.9  | 44667  | 6  | 0 | 0.9276363  | 0.031688 | 8.2524725E-121 | 7.0004459E-186 |
| Q11136 | Pepd     | Xaa-Pro dipeptidase                                                    | 322.341  | 29.21 | 55029  | 11 | 0 | 0.78464705 | 0.027121 | 6.7037659E-141 | 2.2484049E-216 |
| Q14C51 | Ptcd3    | Pentatricopeptide repeat domain-containing protein 3, mitochondrial    | 73.369   | 6.13  | 77796  | 4  | 0 | 1.35400099 | 0.102141 | 4.7293022E-08  | 4.5745683E-28  |
| Q1AAU6 | Asap1    | Arf-GAP with SH3 domain, ANK repeat and PH domain-containing protein 1 | 376.54   | 17.92 | 127088 | 13 | 0 | 0.85051363 | 0.010913 | 3.5606395E-245 | 0              |
| Q3KRE8 | Tubb2b   | Tubulin beta-2B chain                                                  | 1629.306 | 64.27 | 49953  | 36 | 0 | 0.85578097 | 0.012617 | 1.1267883E-226 | 0              |
| Q3TBD2 | Arhgap45 | Rho GTPase-activating protein 45                                       | 339.323  | 15.77 | 122902 | 11 | 0 | 0.763648   | 0.030558 | 7.7648706E-126 | 2.0270493E-193 |

|        |         |                                                                          |         |       |        |    |   |            |          |                |                |
|--------|---------|--------------------------------------------------------------------------|---------|-------|--------|----|---|------------|----------|----------------|----------------|
| Q3TCN2 | Plbd2   | Putative phospholipase B-like 2                                          | 263.875 | 17    | 66289  | 8  | 0 | 0.57279741 | 0.02057  | 1.7592775E-175 | 2.2208533E-271 |
| Q3U0V1 | Khsrp   | Far upstream element-binding protein 2                                   | 709.8   | 30.48 | 76775  | 19 | 0 | 0.88023471 | 0.014633 | 7.7588194E-214 | 0              |
| Q3U4I7 | Pyroxd2 | Pyridine nucleotide-disulfide oxidoreductase domain-containing protein 2 | 48.518  | 3.79  | 62940  | 2  | 0 | 0.80994137 | 0.13158  | 0.39584153     | 1.0343647E-13  |
| Q3U9G9 | Lbr     | Lamin-B receptor                                                         | 489.882 | 25.56 | 71440  | 14 | 0 | 1.36741542 | 0.010214 | 1.3640495E-263 | 0              |
| Q3UFY7 | Nt5c3b  | 7-methylguanosine phosphate-specific 5'-nucleotidase                     | 19.393  | 6.67  | 34425  | 2  | 0 | 0.79922275 | 0.052965 | 1.3829367E-55  | 5.304216E-93   |
| Q3UGP9 | Lrrc58  | Leucine-rich repeat-containing protein 58                                | 61.816  | 12.84 | 40139  | 2  | 0 | 0.76261216 | 0.074415 | 9.1347569E-32  | 2.7529402E-61  |
| Q3URQ0 | Tex10   | Testis-expressed protein 10                                              | 104.337 | 5.71  | 105209 | 4  | 0 | 1.18378932 | 0.037113 | 3.3757367E-100 | 9.8583747E-156 |
| Q3USZ8 |         | Deleted in autism protein 1 homolog                                      | 77.072  | 5.35  | 49463  | 2  | 0 | 1.51547194 | 0.006069 | 0              | 0              |
| Q3UW53 | Fam129a | Protein Niban                                                            | 737.731 | 34.99 | 102649 | 25 | 0 | 0.84527425 | 0.004489 | 0              | 0              |
| Q3UZA1 | Rcsd1   | CapZ-interacting protein                                                 | 48.015  | 7.28  | 44114  | 2  | 0 | 0.38494613 | 0.022243 | 1.5378297E-168 | 5.3743896E-260 |
| Q3V0K9 | Pls1    | Plastin-1                                                                | 323.882 | 11.59 | 70408  | 9  | 0 | 1.12962005 | 0.024898 | 2.3517016E-153 | 8.3171126E-236 |
| Q4FZY0 | Efh2    | EF-hand domain-containing protein D2                                     | 624.41  | 58.16 | 26759  | 16 | 0 | 0.86521885 | 0.01119  | 3.6929991E-241 | 0              |
| Q4G009 | Mcts1   | Malignant T-cell-amplified sequence 1                                    | 100.927 | 20.33 | 20550  | 2  | 0 | 0.63446034 | 0.013313 | 7.3781004E-221 | 0              |
| Q4KLL4 | Tm9sf4  | Transmembrane 9 superfamily member 4                                     | 85.689  | 4.35  | 74675  | 2  | 0 | 1.41173671 | 0.005465 | 0              | 0              |
| Q4KM65 | Nudt21  | Cleavage and polyadenylation specificity factor subunit 5                | 267.979 | 46.26 | 26240  | 7  | 0 | 0.77381383 | 0.004489 | 0              | 0              |
| Q4QRB4 | Tubb3   | Tubulin beta-3 chain                                                     | 1113.19 | 33.11 | 50419  | 24 | 0 | 0.83473383 | 0.009488 | 1.0079459E-279 | 0              |
| Q4V7C7 | Actr3   | Actin-related protein 3                                                  | 974.506 | 76.56 | 47357  | 29 | 0 | 0.84660212 | 0.00741  | 6.0684493e-314 | 0              |

|        |          |                                                         |          |       |        |    |   |            |          |                |                |
|--------|----------|---------------------------------------------------------|----------|-------|--------|----|---|------------|----------|----------------|----------------|
| Q501J6 | Ddx17    | Probable ATP-dependent RNA helicase DDX17               | 518.414  | 21.23 | 72399  | 11 | 0 | 0.87588988 | 0.010913 | 1.7055879E-242 | 0              |
| Q568Z6 | Ist1     | IST1 homolog                                            | 30.577   | 4.37  | 39942  | 2  | 0 | 0.78161266 | 0.002036 | 0              | 0              |
| Q571I9 | Aldh16a1 | Aldehyde dehydrogenase family 16 member A1              | 241.958  | 13.47 | 84756  | 7  | 0 | 0.8099287  | 0.001628 | 0              | 0              |
| Q5FWK3 | Arhgap1  | Rho GTPase-activating protein 1                         | 222.831  | 31.89 | 50411  | 9  | 0 | 0.68468955 | 0.045336 | 1.2210269E-70  | 1.2224753E-113 |
| Q5I0H4 | Tmco1    | Calcium load-activated calcium channel                  | 107.898  | 19.68 | 21175  | 3  | 0 | 1.13118411 | 0.082036 | 3.3320407E-20  | 9.92958E-46    |
| Q5RK09 | Eif3g    | Eukaryotic translation initiation factor 3 subunit G    | 45.846   | 9.69  | 35651  | 3  | 0 | 1.55542866 | 0.116754 | 0.008764224    | 2.3554255E-18  |
| Q5SSL4 | Abr      | Active breakpoint cluster region-related protein        | 138.765  | 8.5   | 97667  | 5  | 0 | 0.66174964 | 0.045063 | 1.9634089E-71  | 9.5367115E-115 |
| Q5SUR0 | Pfas     | Phosphoribosylformylglycinamide synthase                | 587.731  | 26.78 | 144629 | 19 | 0 | 0.72356688 | 0.008063 | 1.248509E-292  | 0              |
| Q5U2R0 | Mat2b    | Methionine adenosyltransferase 2 subunit beta           | 219.535  | 23.65 | 37375  | 5  | 0 | 0.87970741 | 0.0147   | 8.6386429E-209 | 0              |
| Q5XI73 | Arhgdia  | Rho GDP-dissociation inhibitor 1                        | 574.961  | 77.94 | 23407  | 15 | 0 | 0.78308913 | 0.004708 | 0              | 0              |
| Q5XIP6 | Fen1     | Flap endonuclease 1                                     | 128.983  | 21.32 | 42609  | 5  | 0 | 0.83539885 | 0.014806 | 2.758747E-206  | 4.9406565E-324 |
| Q60591 | Nfatc2   | Nuclear factor of activated T-cells, cytoplasmic 2      | 116.59   | 6.15  | 100020 | 3  | 0 | 0.71169797 | 0.026991 | 1.210194E-144  | 3.6545373E-222 |
| Q60597 | Ogdh     | 2-oxoglutarate dehydrogenase, mitochondrial             | 708.109  | 30.6  | 116449 | 22 | 0 | 1.14091725 | 0.003961 | 0              | 0              |
| Q60605 | Myl6     | Myosin light polypeptide 6                              | 651.916  | 66.23 | 16930  | 13 | 0 | 0.78613413 | 0.0109   | 7.5770144E-246 | 0              |
| Q60668 | Hnrnpd   | Heterogeneous nuclear ribonucleoprotein D0              | 240.764  | 22.54 | 38354  | 7  | 0 | 0.79696227 | 0.011481 | 3.4559873E-235 | 0              |
| Q60710 | Samhd1   | Deoxynucleoside triphosphate triphosphohydrolase SAMHD1 | 668.224  | 44.38 | 75893  | 21 | 0 | 0.69007046 | 0.017063 | 5.8956328E-194 | 1.4056842E-302 |
| Q60854 | Serpinb6 | Serpin B6                                               | 1109.272 | 64.81 | 42599  | 24 | 0 | 0.64178853 | 0.003961 | 0              | 0              |



|        |         |                                                        |          |       |        |    |   |            |          |                |                |
|--------|---------|--------------------------------------------------------|----------|-------|--------|----|---|------------|----------|----------------|----------------|
| Q60855 | Ripk1   | Receptor-interacting serine/threonine-protein kinase 1 | 56.794   | 3.2   | 74854  | 2  | 0 | 0.78071621 | 0.064173 | 7.9110117E-42  | 1.5471527E-74  |
| Q60872 | Eif1a   | Eukaryotic translation initiation factor 1A            | 127.34   | 18.06 | 16502  | 2  | 0 | 0.58219867 | 0.004421 | 0              | 0              |
| Q60931 | Vdac3   | Voltage-dependent anion-selective channel protein 3    | 444.29   | 43.11 | 30753  | 9  | 0 | 1.15267527 | 0.01245  | 6.2112042E-230 | 0              |
| Q61036 | Pak3    | Serine/threonine-protein kinase PAK 3                  | 120.297  | 10.38 | 62398  | 5  | 0 | 0.89673424 | 0.011436 | 1.64855E-236   | 0              |
| Q61093 | Cybb    | Cytochrome b-245 heavy chain                           | 329.147  | 37.89 | 65305  | 13 | 0 | 1.38097561 | 0.01089  | 1.6095016E-246 | 0              |
| Q61191 | Hcfc1   | Host cell factor 1                                     | 498.608  | 10.12 | 210437 | 13 | 0 | 0.83301378 | 0.006955 | 1.1064531e-317 | 0              |
| Q61207 | Psap    | Prosaposin                                             | 294.177  | 14.54 | 61422  | 7  | 0 | 0.48399718 | 0.010214 | 3.2987132E-262 | 0              |
| Q61210 | Arhgef1 | Rho guanine nucleotide exchange factor 1               | 557.637  | 26.09 | 102805 | 17 | 0 | 0.8861993  | 0.037439 | 7.6200873E-94  | 1.4456544E-146 |
| Q61263 | Soat1   | Sterol O-acyltransferase 1                             | 202.63   | 14.26 | 63799  | 6  | 0 | 1.21137853 | 0.010447 | 5.0813884E-256 | 0              |
| Q61545 | Ewsr1   | RNA-binding protein EWS                                | 59.664   | 4.43  | 68462  | 2  | 0 | 0.85119539 | 0.032545 | 2.4955126E-118 | 3.4005702E-182 |
| Q61686 | Cbx5    | Chromobox protein homolog 5                            | 139.648  | 18.85 | 22186  | 3  | 0 | 0.68645357 | 0.029274 | 1.6845441E-132 | 1.6360212E-203 |
| Q61879 | Myh10   | Myosin-10                                              | 1972.797 | 32.44 | 228996 | 54 | 0 | 0.91831557 | 0.10173  | 2.4432757E-08  | 1.5925377E-28  |
| Q61990 | Pcbp2   | Poly(rC)-binding protein 2                             | 555.288  | 49.17 | 38222  | 13 | 0 | 0.89903175 | 0.025399 | 1.6184257E-149 | 8.8953856E-230 |
| Q62188 | Dpysl3  | Dihydropyrimidinase-related protein 3                  | 260.334  | 8.95  | 61936  | 6  | 0 | 0.76514525 | 0.010099 | 3.5057626E-276 | 0              |
| Q62193 | Rpa2    | Replication protein A 32 kDa subunit                   | 79.469   | 13.7  | 29718  | 2  | 0 | 0.70363933 | 0.003679 | 0              | 0              |
| Q62318 | Trim28  | Transcription intermediary factor 1-beta               | 935.768  | 42.21 | 88847  | 22 | 0 | 0.89467382 | 0.018235 | 4.0985781E-189 | 2.8197188E-294 |
| Q62418 | Dbnl    | Drebrin-like protein                                   | 465.119  | 31.19 | 48700  | 10 | 0 | 0.81996042 | 0.10458  | 1.0702299E-06  | 7.7509027E-26  |
| Q62433 | Ndrp1   | Protein NDRG1                                          | 888.864  | 60.91 | 43009  | 18 | 0 | 0.60950211 | 0.003688 | 0              | 0              |
| Q62465 | Vat1    | Synaptic vesicle membrane protein VAT-1 homolog        | 373.432  | 35.47 | 43097  | 9  | 0 | 0.732685   | 0.015006 | 2.044348E-204  | 7.6283736e-321 |
| Q62523 | Zyx     | Zyxin                                                  | 273.581  | 18.62 | 60546  | 8  | 0 | 0.83470364 | 0.038313 | 1.6604424E-92  | 1.2255549E-144 |
| Q63799 | Tcea2   | Transcription elongation factor A protein 2            | 53.729   | 7.69  | 33528  | 2  | 0 | 0.7452502  | 0.007943 | 2.9231207E-307 | 0              |

|        |           |                                                            |          |       |        |    |   |            |          |                |                |
|--------|-----------|------------------------------------------------------------|----------|-------|--------|----|---|------------|----------|----------------|----------------|
| Q63921 | Ptgs1     | Prostaglandin G/H synthase 1                               | 208.36   | 22.43 | 69032  | 9  | 0 | 0.76632108 | 0.030596 | 2.5954644E-123 | 1.2615957E-189 |
| Q63945 | Set       | Protein SET                                                | 264.432  | 39.79 | 33406  | 8  | 0 | 0.87616703 | 0.065132 | 6.8567908E-41  | 2.692681E-73   |
| Q64012 | Raly      | RNA-binding protein Raly                                   | 231.157  | 32.05 | 33188  | 10 | 0 | 0.86909378 | 0.012946 | 8.6362518E-223 | 0              |
| Q640N3 | Arhgap30  | Rho GTPase-activating protein 30                           | 48.964   | 5.18  | 120114 | 3  | 0 | 0.71962334 | 0.00391  | 0              | 0              |
| Q641Z6 | Ehd1      | EH domain-containing protein 1                             | 626.153  | 65.73 | 60603  | 27 | 0 | 1.15473907 | 0.010103 | 2.9544748E-271 | 0              |
| Q64232 | Tecr      | Very-long-chain enoyl-CoA reductase                        | 127.618  | 13.96 | 36123  | 6  | 0 | 1.27307619 | 0.008997 | 1.4341263E-282 | 0              |
| Q64430 | Atp7a     | Copper-transporting ATPase 1                               | 60.924   | 2.88  | 161959 | 3  | 0 | 1.27813191 | 0.026991 | 4.9234707E-143 | 1.1271584E-219 |
| Q64514 | Tpp2      | Tripeptidyl-peptidase 2                                    | 740.218  | 25.91 | 139879 | 24 | 0 | 0.89905788 | 0.014911 | 1.1608854E-205 | 4.4465908E-323 |
| Q64522 | Hist2h2ab | Histone H2A type 2-B                                       | 380.051  | 57.69 | 14013  | 7  | 0 | 1.11488153 | 0.053703 | 4.089987E-53   | 1.2362474E-89  |
| Q66H50 | Far1      | Fatty acyl-CoA reductase 1                                 | 225.411  | 18.45 | 59268  | 6  | 0 | 1.25181431 | 0.019068 | 6.0105301E-182 | 3.7860781E-282 |
| Q66HA6 | Arl8b     | ADP-ribosylation factor-like protein 8B                    | 360.396  | 53.76 | 21539  | 11 | 0 | 0.82833398 | 0.036235 | 7.6149946E-105 | 1.9249292E-162 |
| Q68FD5 | Cltc      | Clathrin heavy chain 1                                     | 4079.117 | 65.73 | 191557 | 96 | 0 | 0.88023033 | 0.010447 | 2.16948E-257   | 0              |
| Q6A0D4 | Rftn1     | Raftlin                                                    | 82.367   | 11.91 | 61537  | 4  | 0 | 0.77265081 | 0.011223 | 3.6710954E-239 | 0              |
| Q6AXS3 | Dek       | Protein DEK                                                | 232.107  | 21.16 | 42892  | 7  | 0 | 0.67475074 | 0.043308 | 1.9584821E-73  | 1.4778192E-117 |
| Q6AXY7 | Prpf38b   | Pre-mRNA-splicing factor 38B                               | 55.077   | 3.32  | 63932  | 2  | 0 | 0.65224841 | 0.303439 | 1              | 1              |
| Q6AYE2 | Sh3glb1   | Endophilin-B1                                              | 166.687  | 16.16 | 40787  | 5  | 0 | 0.79960727 | 0.081312 | 1.9834942E-20  | 4.8538761E-46  |
| Q6DFW4 | Nop58     | Nucleolar protein 58                                       | 431.638  | 23.51 | 60343  | 9  | 0 | 0.85035158 | 0.008623 | 1.9838484E-285 | 0              |
| Q6GQT9 | Nomo1     | Nodal modulator 1                                          | 253.918  | 11.2  | 133420 | 9  | 0 | 1.40831648 | 0.001905 | 0              | 0              |
| Q6IMY8 | Hnrnpu    | Heterogeneous nuclear ribonucleoprotein U                  | 1237.314 | 46.87 | 87732  | 34 | 0 | 0.89543776 | 0.024703 | 1.8508342E-154 | 1.503669E-237  |
| Q6NSR8 | Npepl1    | Probable aminopeptidase NPEPL1                             | 194.656  | 18.89 | 55940  | 7  | 0 | 0.73730998 | 0.012682 | 4.4120745E-224 | 0              |
| Q6P3A8 | Bckdhb    | 2-oxoisovalerate dehydrogenase subunit beta, mitochondrial | 28.169   | 9.49  | 42880  | 2  | 0 | 0.56317763 | 0.032486 | 7.994514E-119  | 6.2895623E-183 |
| Q6P5F9 | Xpo1      | Exportin-1                                                 | 972.08   | 36.79 | 123093 | 28 | 0 | 0.87718911 | 0.016096 | 1.0683395E-200 | 2.7345965E-314 |
| Q6PCT3 | Tpd52l2   | Tumor protein D54                                          | 38.425   | 9.55  | 23992  | 2  | 0 | 0.74963305 | 0.035732 | 9.9515848E-107 | 3.5636396E-165 |

|        |         |                                                      |          |       |        |    |   |            |          |                |                |
|--------|---------|------------------------------------------------------|----------|-------|--------|----|---|------------|----------|----------------|----------------|
| Q6PDG5 | Smarcc2 | SWI/SNF complex subunit SMARCC2                      | 128.747  | 5.94  | 132604 | 5  | 0 | 0.83012269 | 0.005135 | 0              | 0              |
| Q6PDM2 | Srsf1   | Serine/arginine-rich splicing factor 1               | 185.744  | 32.66 | 27745  | 7  | 0 | 0.7980103  | 0.051273 | 2.6387651E-60  | 2.0185921E-99  |
| Q6Q0N3 | Nt5dc2  | 5'-nucleotidase domain-containing protein 2          | 130.949  | 10.49 | 63653  | 4  | 0 | 0.69456725 | 0.017933 | 2.5523478E-190 | 2.4862031E-296 |
| Q6Q899 | Ddx58   | Probable ATP-dependent RNA helicase DDX58            | 113.886  | 6.59  | 105975 | 4  | 0 | 1.50297929 | 0.057716 | 2.3698281E-50  | 6.7981065E-86  |
| Q6TUG0 | Dnajb11 | DnaJ homolog subfamily B member 11                   | 290.148  | 30.17 | 40495  | 7  | 0 | 1.27209039 | 0.012556 | 2.521612E-227  | 0              |
| Q6URK4 | Hnrnpa3 | Heterogeneous nuclear ribonucleoprotein A3           | 923.97   | 41.42 | 39652  | 20 | 0 | 0.83483471 | 0.002283 | 0              | 0              |
| Q6WVG3 | Kctd12  | BTB/POZ domain-containing protein KCTD12             | 340.99   | 40.06 | 35892  | 8  | 0 | 0.828796   | 0.01585  | 1.4901293E-202 | 1.5399833e-317 |
| Q6ZQI3 | Mlec    | Malectin                                             | 104.181  | 12.37 | 32342  | 3  | 0 | 1.18089517 | 0.007882 | 3.1864146e-310 | 0              |
| Q6ZWQ7 | Spcs3   | Signal peptidase complex subunit 3                   | 55.049   | 17.78 | 20313  | 3  | 0 | 1.37935962 | 0.004996 | 0              | 0              |
| Q71LX4 | Tln2    | Talin-2                                              | 478.82   | 5.35  | 253621 | 15 | 0 | 0.922664   | 0.03692  | 1.3925139E-101 | 9.9257345E-158 |
| Q78IK2 | Atp5md  | Up-regulated during skeletal muscle growth protein 5 | 166.998  | 44.83 | 6382   | 3  | 0 | 1.14467686 | 0.02442  | 2.382661E-158  | 1.0501669E-243 |
| Q78P75 | Dynl12  | Dynein light chain 2, cytoplasmic                    | 86.955   | 25.84 | 10350  | 2  | 0 | 0.65425814 | 0.011223 | 1.6945031E-238 | 0              |
| Q7TPJ0 | Ssr1    | Translocon-associated protein subunit alpha          | 59.898   | 10.66 | 35629  | 3  | 0 | 1.34199657 | 0.040089 | 4.4395281E-85  | 4.91991E-134   |
| Q7TPR4 | Actn1   | Alpha-actinin-1                                      | 1341.234 | 44.73 | 103068 | 32 | 0 | 0.84834479 | 0.014633 | 1.4328996E-212 | 0              |
| Q80SW1 | Ahcy11  | S-adenosylhomocysteine hydrolase-like protein 1      | 265.391  | 25.28 | 58951  | 10 | 0 | 0.87551117 | 0.023429 | 2.0675259E-163 | 9.7627754E-252 |
| Q80VA0 | Galnt7  | N-acetylgalactosaminyltransferase 7                  | 30.194   | 5.02  | 75419  | 2  | 0 | 1.28460698 | 0.022823 | 8.0137836E-167 | 3.1945228E-257 |
| Q80VD1 | Fam98b  | Protein FAM98B                                       | 80.732   | 6.76  | 45349  | 2  | 0 | 0.70531475 | 0.022929 | 1.5189608E-164 | 1.4749478E-253 |
| Q80X41 | Vrk1    | Serine/threonine-protein kinase VRK1                 | 196.372  | 25    | 49741  | 8  | 0 | 0.86481896 | 0.014276 | 2.225649E-216  | 0              |

|        |        |                                                            |          |       |        |    |   |            |          |                |                |
|--------|--------|------------------------------------------------------------|----------|-------|--------|----|---|------------|----------|----------------|----------------|
| Q811U4 | Mfn1   | Mitofusin-1                                                | 14.964   | 2.43  | 83726  | 2  | 0 | 1.7580448  | 0.026075 | 8.4169356E-147 | 1.6032954E-225 |
| Q8BG07 | Pld4   | Phospholipase D4                                           | 660.298  | 46.52 | 56154  | 18 | 0 | 0.75784231 | 0.010214 | 3.8711092E-260 | 0              |
| Q8BGH2 | Samm50 | Sorting and assembly machinery component 50 homolog        | 237.323  | 22.81 | 51864  | 8  | 0 | 1.17294611 | 0.022921 | 1.1074926E-165 | 2.1889831E-255 |
| Q8BH61 | F13a1  | Coagulation factor XIII A chain                            | 164.935  | 14.48 | 83207  | 9  | 0 | 0.33486593 | 0.037005 | 1.1688182E-100 | 2.1346473E-156 |
| Q8BH86 | Dglucy | D-glutamate cyclase, mitochondrial                         | 162.102  | 14.42 | 66366  | 5  | 0 | 0.63589418 | 0.010863 | 3.2188595E-249 | 0              |
| Q8BH95 | Echs1  | Enoyl-CoA hydratase, mitochondrial                         | 206.452  | 23.1  | 31474  | 5  | 0 | 0.81513449 | 0.028103 | 1.0044837E-137 | 1.7647169E-211 |
| Q8BHN3 | Ganab  | Neutral alpha-glucosidase AB                               | 999.162  | 43.64 | 106911 | 31 | 0 | 1.17099724 | 0.003128 | 0              | 0              |
| Q8BHZ0 | Fam49a | Protein FAM49A                                             | 122.261  | 18.58 | 37343  | 4  | 0 | 0.6425975  | 0.022921 | 4.1054063E-165 | 1.7985393E-254 |
| Q8BK67 | Rcc2   | Protein RCC2                                               | 650.406  | 48.27 | 55983  | 19 | 0 | 0.79109885 | 0.010099 | 1.7813689E-275 | 0              |
| Q8BLF1 | Nceh1  | Neutral cholesterol ester hydrolase 1                      | 471.958  | 49.51 | 45740  | 12 | 0 | 1.25090458 | 0.012164 | 6.7385886E-232 | 0              |
| Q8BMJ3 | Eif1ax | Eukaryotic translation initiation factor 1A, X-chromosomal | 158.528  | 18.75 | 16460  | 3  | 0 | 0.71586333 | 0.020981 | 9.8125402E-174 | 1.6738047E-268 |
| Q8BMK4 | Ckap4  | Cytoskeleton-associated protein 4                          | 910.017  | 51.48 | 63692  | 24 | 0 | 1.2708903  | 0.002645 | 0              | 0              |
| Q8BMS1 | Hadha  | Trifunctional enzyme subunit alpha, mitochondrial          | 1127.238 | 47.44 | 82670  | 24 | 0 | 0.88411555 | 0.016728 | 1.2740708E-197 | 6.4235631e-309 |
| Q8BPU7 | Elmo1  | Engulfment and cell motility protein 1                     | 416.403  | 28.61 | 83936  | 16 | 0 | 0.63874326 | 0.01089  | 3.4127792E-247 | 0              |
| Q8BTI8 | Srrm2  | Serine/arginine repetitive matrix protein 2                | 362.852  | 6.4   | 294840 | 11 | 0 | 0.10393214 | 0.004071 | 0              | 0              |
| Q8BUM3 | Ptpn7  | Tyrosine-protein phosphatase non-receptor type 7           | 193.124  | 21.73 | 40351  | 5  | 0 | 0.68376691 | 0.0034   | 0              | 0              |
| Q8BYI6 | Lpcat2 | Lysophosphatidylcholine acyltransferase 2                  | 90.418   | 10.11 | 60254  | 4  | 0 | 1.62363762 | 0.010109 | 7.4287632E-270 | 0              |
| Q8C2Q3 | Rbm14  | RNA-binding protein 14                                     | 241.333  | 13.75 | 69449  | 7  | 0 | 0.80845939 | 0.008063 | 2.2622063E-301 | 0              |
| Q8C9B9 | Dido1  | Death-inducer obliterator 1                                | 38.162   | 1.37  | 247176 | 2  | 0 | 0.78660403 | 0.020981 | 2.5730587E-174 | 1.8567014E-269 |
| Q8CCF0 | Prpf31 | U4/U6 small nuclear ribonucleoprotein Prp31                | 53.378   | 7.62  | 55430  | 2  | 0 | 0.55106488 | 0.002916 | 0              | 0              |

|        |          |                                                                                  |         |       |        |    |   |            |          |                |                |
|--------|----------|----------------------------------------------------------------------------------|---------|-------|--------|----|---|------------|----------|----------------|----------------|
| Q8CGY8 | Ogt      | UDP-N-acetylglucosamine--peptide N-acetylglucosaminyltransferase 110 kDa subunit | 158.065 | 6.41  | 116952 | 5  | 0 | 0.6859119  | 0.1436   | 1              | 8.8880854E-08  |
| Q8CI94 | Pygb     | Glycogen phosphorylase, brain form                                               | 767.631 | 34.4  | 96730  | 24 | 0 | 0.87121218 | 0.013735 | 1.4182431E-219 | 0              |
| Q8CIM5 | Gpr84    | G-protein coupled receptor 84                                                    | 233.413 | 22.22 | 43717  | 6  | 0 | 1.95619714 | 0.004996 | 0              | 0              |
| Q8CIN7 | Impa2    | Inositol monophosphatase 2                                                       | 46.609  | 11.38 | 31796  | 2  | 0 | 0.74267965 | 0.016096 | 1.8268529E-199 | 3.9119852e-312 |
| Q8CIZ9 | Nox1     | NADPH oxidase 1                                                                  | 27.213  | 2.54  | 68193  | 2  | 0 | 1.41721077 | 0.02126  | 2.0366913E-171 | 1.0625714E-264 |
| Q8JZR0 | AcsI5    | Long-chain-fatty-acid--CoA ligase 5                                              | 333.003 | 24.6  | 76206  | 12 | 0 | 1.11085515 | 0.042052 | 3.6479845E-79  | 1.2354719E-125 |
| Q8JZX4 | Rbm17    | Splicing factor 45                                                               | 45.392  | 7.41  | 45304  | 2  | 0 | 0.54532392 | 0.010103 | 5.8763887E-272 | 0              |
| Q8K183 | Pdxk     | Pyridoxal kinase                                                                 | 413.942 | 39.42 | 35015  | 9  | 0 | 0.67496115 | 0.003679 | 0              | 0              |
| Q8K297 | Colgalt1 | Procollagen galactosyltransferase 1                                              | 282.896 | 14.59 | 71061  | 9  | 0 | 1.30789365 | 0.003303 | 0              | 0              |
| Q8K2C9 | Hacd3    | Very-long-chain (3R)-3-hydroxyacyl-CoA dehydratase 3                             | 128.075 | 17.68 | 43131  | 4  | 0 | 1.21371879 | 0.085409 | 3.1376933E-18  | 5.1951958E-43  |
| Q8K3G9 | Appl2    | DCC-interacting protein 13-beta                                                  | 215.632 | 25.23 | 73854  | 10 | 0 | 0.71027757 | 0.010214 | 2.2832875E-266 | 0              |
| Q8QZT1 | Acat1    | Acetyl-CoA acetyltransferase, mitochondrial                                      | 549.109 | 47.88 | 44816  | 11 | 0 | 0.85669917 | 0.016096 | 6.2018E-202    | 1.8830886e-316 |
| Q8QZY1 | Eif3l    | Eukaryotic translation initiation factor 3 subunit L                             | 688.491 | 35.64 | 66613  | 16 | 0 | 1.18335008 | 0.053031 | 1.6063142E-54  | 1.498696E-91   |
| Q8R180 | Ero1a    | ERO1-like protein alpha                                                          | 524.829 | 53.88 | 54084  | 17 | 0 | 1.42675172 | 0.007992 | 4.7840385E-305 | 0              |
| Q8R1S4 | Mtss1    | Metastasis suppressor protein 1                                                  | 214.905 | 13.31 | 82408  | 7  | 0 | 0.81628643 | 0.008063 | 3.4891046E-291 | 0              |
| Q8R491 | Ehd3     | EH domain-containing protein 3                                                   | 259.129 | 23.55 | 60791  | 13 | 0 | 1.11414094 | 0.011481 | 1.5781029E-234 | 0              |
| Q8R5J9 | Arl6ip5  | PRA1 family protein 3                                                            | 153.183 | 23.94 | 21558  | 5  | 0 | 1.35304727 | 0.025326 | 2.9652105E-152 | 4.517346E-234  |
| Q8VBT0 | Tmx1     | Thioredoxin-related transmembrane protein 1                                      | 168.028 | 16.91 | 31396  | 4  | 0 | 1.19003574 | 0.00741  | 3.3778227e-313 | 0              |

|        |         |                                                                                        |          |       |        |     |   |            |          |                |                |
|--------|---------|----------------------------------------------------------------------------------------|----------|-------|--------|-----|---|------------|----------|----------------|----------------|
| Q8VBT9 | Aspscr1 | Tether containing<br>UBX domain for<br>GLUT4                                           | 60.7     | 6.91  | 59796  | 2   | 0 | 0.7523823  | 0.014602 | 4.1706945E-215 | 0              |
| Q8VCN5 | Cth     | Cystathionine<br>gamma-lyase                                                           | 349.244  | 29.9  | 43567  | 8   | 0 | 1.66872057 | 0.006261 | 0              | 0              |
| Q8VCT3 | Rnpep   | Aminopeptidase B                                                                       | 1034.075 | 55.85 | 72416  | 27  | 0 | 0.82494866 | 0.005135 | 0              | 0              |
| Q8VDD5 | Myh9    | Myosin-9                                                                               | 6108.517 | 65.77 | 226372 | 143 | 0 | 0.9043874  | 0.025399 | 3.7100801E-151 | 2.3875547E-232 |
| Q8VDK1 | Nit1    | Deaminated<br>glutathione amidase                                                      | 137.33   | 25.08 | 35705  | 4   | 0 | 0.600417   | 0.029465 | 2.0897637E-129 | 8.066379E-199  |
| Q8VDL4 | Adpgk   | ADP-dependent<br>glucokinase                                                           | 153.351  | 11.69 | 53902  | 4   | 0 | 1.33746085 | 0.011481 | 7.1931128E-234 | 0              |
| Q8VE37 | Rcc1    | Regulator of<br>chromosome<br>condensation                                             | 276.016  | 30.64 | 44931  | 7   | 0 | 0.83645968 | 0.008063 | 1.2223677E-300 | 0              |
| Q8VEB4 | Pla2g15 | Group XV<br>phospholipase A2                                                           | 146.52   | 21.84 | 47307  | 6   | 0 | 0.7071917  | 0.025399 | 1.3085528E-150 | 1.7241376E-231 |
| Q8VEH3 | Arl8a   | ADP-ribosylation<br>factor-like protein 8A                                             | 273.771  | 44.09 | 21390  | 7   | 0 | 0.7723031  | 0.02442  | 1.3669201E-160 | 2.9917284E-247 |
| Q8VIJ6 | Sfpq    | Splicing factor,<br>proline- and<br>glutamine-rich                                     | 665.644  | 31.9  | 75442  | 18  | 0 | 0.86427596 | 0.052133 | 7.7891519E-59  | 2.0230343E-97  |
| Q8WTY4 | Ciapi1  | Anamorsin                                                                              | 142.093  | 29.77 | 33429  | 5   | 0 | 0.41999251 | 0.001754 | 0              | 0              |
| Q91V04 | Tram1   | Translocating chain-<br>associated membrane<br>protein 1                               | 171.159  | 19.25 | 43039  | 6   | 0 | 1.20510236 | 0.093025 | 2.530448E-11   | 3.9977584E-33  |
| Q91V76 |         | Ester hydrolase<br>C11orf54 homolog                                                    | 97.997   | 18.1  | 34996  | 3   | 0 | 0.5756321  | 0.011436 | 3.5908387E-237 | 0              |
| Q91XU1 | Qki     | Protein quaking                                                                        | 203.341  | 23.75 | 37643  | 5   | 0 | 0.67876751 | 0.008239 | 2.6681682E-288 | 0              |
| Q91YQ5 | Rpn1    | Dolichyl-<br>diphosphooligosacch<br>aride--protein<br>glycosyltransferase<br>subunit 1 | 874.429  | 46.71 | 68528  | 22  | 0 | 1.21993176 | 0.001188 | 0              | 0              |
| Q91YR9 | Ptgr1   | Prostaglandin<br>reductase 1                                                           | 329.123  | 36.47 | 35560  | 9   | 0 | 0.76224778 | 0.002654 | 0              | 0              |
| Q91ZX7 | Lrp1    | Prolow-density<br>lipoprotein receptor-<br>related protein 1                           | 2764.038 | 22.4  | 504742 | 73  | 0 | 0.74962365 | 0.003961 | 0              | 0              |
| Q921F4 | HnrnpII | Heterogeneous<br>nuclear<br>ribonucleoprotein L-<br>like                               | 394.855  | 33.84 | 64125  | 13  | 0 | 0.80096617 | 0.00741  | 1.8768908e-312 | 0              |
| Q921M7 | Fam49b  | Protein FAM49B                                                                         | 581.935  | 58.64 | 36776  | 15  | 0 | 0.84146784 | 0.030363 | 2.4139024E-126 | 3.4893544E-194 |

|        |         |                                                                    |          |       |        |    |   |            |          |                |                |
|--------|---------|--------------------------------------------------------------------|----------|-------|--------|----|---|------------|----------|----------------|----------------|
| Q922B2 | Dars    | Aspartate--tRNA<br>ligase, cytoplasmic                             | 547.159  | 46.51 | 57147  | 22 | 0 | 1.24136346 | 0.014276 | 9.6433497E-216 | 0              |
| Q922D4 | Ppp6r3  | Serine/threonine-<br>protein phosphatase<br>6 regulatory subunit 3 | 123.538  | 4.15  | 94653  | 4  | 0 | 1.31510251 | 0.055914 | 4.8988124E-51  | 8.1521557E-87  |
| Q922F4 | Tubb6   | Tubulin beta-6 chain                                               | 1199.02  | 64.65 | 50090  | 27 | 0 | 0.9182704  | 0.051189 | 1.1256316E-60  | 6.3173719E-100 |
| Q922R8 | Pdia6   | Protein disulfide-<br>isomerase A6                                 | 791.765  | 48.64 | 48100  | 16 | 0 | 1.13373465 | 0.010109 | 3.7152028E-269 | 0              |
| Q924Z4 | Cers2   | Ceramide synthase 2                                                | 118.544  | 11.84 | 45024  | 3  | 0 | 1.68581727 | 0.017223 | 2.3911665E-193 | 1.5735532E-301 |
| Q93092 | Taldo1  | Transaldolase                                                      | 956.355  | 77.74 | 37387  | 28 | 0 | 0.84203906 | 0.001188 | 0              | 0              |
| Q99JX4 | Eif3m   | Eukaryotic translation<br>initiation factor 3<br>subunit M         | 280.026  | 29.14 | 42517  | 7  | 0 | 0.70092107 | 0.020285 | 3.1012621E-177 | 2.7792793E-274 |
| Q99KC8 | Vwa5a   | von Willebrand factor<br>A domain-containing<br>protein 5A         | 1382.493 | 55.23 | 87143  | 31 | 0 | 0.83808105 | 0.006193 | 0              | 0              |
| Q99KH8 | Stk24   | Serine/threonine-<br>protein kinase 24                             | 344.392  | 27.15 | 47954  | 10 | 0 | 0.76387524 | 0.006427 | 0              | 0              |
| Q99KP3 | Cryl1   | Lambda-crystallin<br>homolog                                       | 80.371   | 14.42 | 35209  | 3  | 0 | 0.64093997 | 0.01378  | 6.2011288E-219 | 0              |
| Q99L20 | Gstt3   | Glutathione S-<br>transferase theta-3                              | 18.425   | 9.13  | 27403  | 2  | 0 | 0.82952936 | 0.008063 | 2.3555266E-293 | 0              |
| Q99LQ7 | Tmem189 | Transmembrane<br>protein 189                                       | 104.394  | 21.77 | 31134  | 3  | 0 | 0.61705299 | 0.062191 | 4.7080998E-44  | 1.7206606E-77  |
| Q99LX0 | Park7   | Protein/nucleic acid<br>deglycase DJ-1                             | 481.906  | 74.6  | 20021  | 12 | 0 | 0.68348455 | 0.027136 | 2.2788329E-140 | 1.4901236E-215 |
| Q99MR3 | Slc12a9 | Solute carrier family<br>12 member 9                               | 175.845  | 8.42  | 96330  | 6  | 0 | 0.76196615 | 0.004489 | 0              | 0              |
| Q99N69 | Lpxn    | Leupaxin                                                           | 478.931  | 30.57 | 43478  | 11 | 0 | 0.78410735 | 0.010103 | 1.1667378E-272 | 0              |
| Q99PL5 | Rrbp1   | Ribosome-binding<br>protein 1                                      | 1019.678 | 26.48 | 172879 | 33 | 0 | 0.85953527 | 0.007057 | 6.2126191e-317 | 0              |
| Q9CPQ1 | Cox6c   | Cytochrome c<br>oxidase subunit 6C                                 | 35.183   | 19.74 | 8469   | 2  | 0 | 1.21305862 | 0.006427 | 5.9287878e-323 | 0              |
| Q9CPU0 | Glo1    | Lactoylglutathione<br>lyase                                        | 134.222  | 36.96 | 20810  | 6  | 0 | 0.77116018 | 0.001754 | 0              | 0              |
| Q9CPV4 | Glod4   | Glyoxalase domain-<br>containing protein 4                         | 452.641  | 66.78 | 33317  | 15 | 0 | 0.81071735 | 0.008063 | 6.6059266E-292 | 0              |
| Q9CPW4 | Arpc5   | Actin-related protein<br>2/3 complex subunit 5                     | 182.71   | 39.07 | 16288  | 5  | 0 | 0.84640021 | 0.010214 | 4.5980049E-267 | 0              |
| Q9CQI6 | Cotl1   | Coactosin-like protein                                             | 340.221  | 71.83 | 15944  | 12 | 0 | 0.85389443 | 0.005135 | 0              | 0              |
| Q9CQM5 | Txndc17 | Thioredoxin domain-<br>containing protein 17                       | 67.76    | 18.7  | 14015  | 2  | 0 | 0.7657042  | 0.030558 | 2.4927773E-125 | 1.1695525E-192 |

|        |         |                                                                                     |          |       |        |    |   |            |          |                |                |
|--------|---------|-------------------------------------------------------------------------------------|----------|-------|--------|----|---|------------|----------|----------------|----------------|
| Q9CQN1 | Trap1   | Heat shock protein 75 kDa, mitochondrial                                            | 264.616  | 17.28 | 80209  | 10 | 0 | 1.44078991 | 0.010099 | 4.5750644E-274 | 0              |
| Q9CQW9 | Ifitm3  | Interferon-induced transmembrane protein 3                                          | 116.3    | 36.5  | 14954  | 3  | 0 | 1.46079142 | 0.021219 | 5.3810579E-172 | 1.2005988E-265 |
| Q9CR57 | Rpl14   | 60S ribosomal protein L14                                                           | 119.827  | 21.66 | 23564  | 4  | 0 | 1.44407987 | 0.004686 | 0              | 0              |
| Q9CSN1 | Snw1    | SNW domain-containing protein 1                                                     | 136.612  | 9.33  | 61475  | 3  | 0 | 0.81619677 | 0.014633 | 3.3373501E-213 | 0              |
| Q9CT10 | Ranbp3  | Ran-binding protein 3                                                               | 155.084  | 15.07 | 52573  | 5  | 0 | 0.85462172 | 0.033895 | 6.4122543E-114 | 1.0702965E-175 |
| Q9CU62 | Smc1a   | Structural maintenance of chromosomes protein 1A                                    | 329.71   | 14.19 | 143235 | 15 | 0 | 0.90085107 | 0.046927 | 2.7843134E-68  | 2.2836832E-110 |
| Q9CW03 | Smc3    | Structural maintenance of chromosomes protein 3                                     | 732.012  | 24.08 | 141556 | 22 | 0 | 0.85802055 | 0.020981 | 1.4190278E-172 | 1.344572E-266  |
| Q9CWJ9 | Atic    | Bifunctional purine biosynthesis protein PURH                                       | 1231.219 | 73.14 | 64217  | 30 | 0 | 0.91858341 | 0.039849 | 1.6513909E-85  | 1.1989933E-134 |
| Q9CWK8 | Snx2    | Sorting nexin-2                                                                     | 876.156  | 52.22 | 58471  | 23 | 0 | 0.77914448 | 0.002645 | 0              | 0              |
| Q9CX86 | Hnrnpa0 | Heterogeneous nuclear ribonucleoprotein A0                                          | 472.942  | 32.79 | 30530  | 10 | 0 | 0.75632042 | 0.00381  | 0              | 0              |
| Q9CXY9 | Pigk    | GPI-anchor transamidase                                                             | 60.615   | 5.82  | 44895  | 2  | 0 | 1.3172183  | 0.162736 | 1              | 0.0073283356   |
| Q9CY64 | Blvra   | Biliverdin reductase A                                                              | 693.431  | 62.37 | 33525  | 17 | 0 | 0.89607671 | 0.010447 | 4.4707827E-258 | 0              |
| Q9CZU6 | Cs      | Citrate synthase, mitochondrial                                                     | 529.968  | 37.93 | 51737  | 16 | 0 | 1.16536972 | 0.009571 | 5.1669872E-279 | 0              |
| Q9CZY3 | Ube2v1  | Ubiquitin-conjugating enzyme E2 variant 1                                           | 106.734  | 28.57 | 16355  | 4  | 0 | 0.90897518 | 0.04219  | 9.4948799E-79  | 4.7759037E-125 |
| Q9D0F3 | Lman1   | Protein ERGIC-53                                                                    | 302.23   | 32.3  | 57789  | 9  | 0 | 1.25585799 | 0.209901 | 1              | 0.96966329     |
| Q9D172 | Gatd3a  | Glutamine amidotransferase-like class 1 domain-containing protein 3A, mitochondrial | 48.883   | 12.41 | 28090  | 3  | 0 | 0.81382263 | 0.024994 | 8.3586628E-153 | 6.1444858E-235 |
| Q9D2V7 | Coro7   | Coronin-7                                                                           | 315.235  | 17.25 | 100812 | 9  | 0 | 0.76863846 | 0.011422 | 7.80745E-238   | 0              |
| Q9D6F9 | Tubb4a  | Tubulin beta-4A chain                                                               | 1728.708 | 70.95 | 49586  | 37 | 0 | 0.82142871 | 0.011741 | 3.2727779E-233 | 0              |
| Q9D6K9 | Cers5   | Ceramide synthase 5                                                                 | 94.804   | 12.56 | 48167  | 4  | 0 | 1.21242112 | 0.010447 | 1.0508854E-256 | 0              |
| Q9D6U8 | Fam162a | Protein FAM162A                                                                     | 163.641  | 36.13 | 17725  | 6  | 0 | 1.34741162 | 0.017648 | 1.5776941E-191 | 2.1258185E-298 |



|        |         |                                                                          |          |       |        |    |   |            |          |                |                |
|--------|---------|--------------------------------------------------------------------------|----------|-------|--------|----|---|------------|----------|----------------|----------------|
| Q9D7S7 | Rpl22l1 | 60S ribosomal protein L22-like 1                                         | 159.879  | 45.08 | 14467  | 4  | 0 | 1.19844728 | 0.02442  | 1.1202902E-156 | 4.6491615E-241 |
| Q9D8E6 | Rpl4    | 60S ribosomal protein L4                                                 | 384.919  | 37.47 | 47154  | 12 | 0 | 2.2042643  | 0.006261 | 0              | 0              |
| Q9D8U8 | Snx5    | Sorting nexin-5                                                          | 756.615  | 58.66 | 46797  | 23 | 0 | 0.80640699 | 0.004721 | 0              | 0              |
| Q9D964 | Gatm    | Glycine amidinotransferase, mitochondrial                                | 445.082  | 51.54 | 48297  | 15 | 0 | 0.81327482 | 0.010447 | 2.4526555E-255 | 0              |
| Q9DAR7 | Dcps    | m7GpppX diphosphatase                                                    | 396.432  | 47.93 | 38988  | 11 | 0 | 0.75969358 | 0.002645 | 0              | 0              |
| Q9DBB8 | Dhdh    | Trans-1,2-dihydrobenzene-1,2-diol dehydrogenase                          | 222.785  | 20.12 | 36301  | 4  | 0 | 0.75208056 | 0.033025 | 7.7741413E-118 | 1.8321203E-181 |
| Q9DBC7 | Prkar1a | cAMP-dependent protein kinase type I- $\alpha$ regulatory subunit        | 390.797  | 36.48 | 43185  | 11 | 0 | 0.87221557 | 0.027279 | 7.7313923E-140 | 9.8446908E-215 |
| Q9DBD5 | Pelp1   | Proline-, glutamic acid- and leucine-rich protein 1                      | 106.259  | 4.1   | 118069 | 4  | 0 | 1.19102403 | 0.069628 | 1.2186769E-36  | 1.1055574E-67  |
| Q9DBG6 | Rpn2    | Dolichyl-diphosphooligosaccharide--protein glycosyltransferase subunit 2 | 1215.901 | 54.36 | 69063  | 23 | 0 | 1.16949227 | 0.005033 | 0              | 0              |
| Q9DBP5 | Cmpk1   | UMP-CMP kinase                                                           | 274.558  | 42.86 | 22165  | 8  | 0 | 0.82162955 | 0.010214 | 5.600604E-265  | 0              |
| Q9DBR1 | Xrn2    | 5'-3' exoribonuclease 2                                                  | 356.657  | 18.72 | 108687 | 13 | 0 | 0.79756366 | 0.008063 | 6.5934373E-300 | 0              |
| Q9DC53 | Cpne8   | Copine-8                                                                 | 25.264   | 5.2   | 64667  | 2  | 0 | 1.21405434 | 0.07505  | 8.8065801E-29  | 2.3450457E-57  |
| Q9DCG9 | Trmt112 | Multifunctional methyltransferase subunit TRM112-like protein            | 42.929   | 20    | 14141  | 2  | 0 | 0.76626947 | 0.147285 | 1              | 8.6020227E-07  |
| Q9DCL9 | Paics   | Multifunctional protein ADE2                                             | 428.915  | 45.41 | 47006  | 13 | 0 | 0.83356645 | 0.008063 | 8.3405856E-295 | 0              |
| Q9DCN2 | Cyb5r3  | NADH-cytochrome b5 reductase 3                                           | 497.727  | 52.82 | 34128  | 14 | 0 | 1.21038842 | 0.023223 | 5.6093389E-164 | 1.2056291E-252 |
| Q9EPB4 | Pycard  | Apoptosis-associated speck-like protein containing a CARD                | 197.84   | 36.79 | 21459  | 6  | 0 | 0.88387968 | 0.012682 | 2.2377642E-225 | 0              |
| Q9EQ32 | Pik3ap1 | Phosphoinositide 3-kinase adapter protein 1                              | 749.784  | 26.63 | 90928  | 18 | 0 | 0.65380223 | 0.001905 | 0              | 0              |

|        |         |                                                      |          |       |        |    |   |            |          |                |                |
|--------|---------|------------------------------------------------------|----------|-------|--------|----|---|------------|----------|----------------|----------------|
| Q9EQK5 | Mvp     | Major vault protein                                  | 1063.413 | 46.34 | 95924  | 28 | 0 | 1.46390192 | 0.003961 | 0              | 0              |
| Q9EQP2 | Ehd4    | EH domain-containing protein 4                       | 669.126  | 44.92 | 61481  | 20 | 0 | 0.89002856 | 0.017285 | 3.9116176E-192 | 1.9319502E-299 |
| Q9EQV6 | Tpp1    | Tripeptidyl-peptidase 1                              | 73.575   | 6.22  | 61332  | 2  | 0 | 0.32350491 | 0.018701 | 3.9140869E-183 | 3.7976652E-284 |
| Q9ER00 | Stx12   | Syntaxin-12                                          | 150.501  | 23.72 | 31195  | 5  | 0 | 0.61504035 | 0.006427 | 1.9317967e-321 | 0              |
| Q9ERL7 | Gmfg    | Glia maturation factor gamma                         | 94.209   | 30.28 | 16748  | 4  | 0 | 0.76793392 | 0.012556 | 5.6328643E-228 | 0              |
| Q9ESY9 | Ifi30   | Gamma-interferon-inducible lysosomal thiol reductase | 195.149  | 20.97 | 27784  | 6  | 0 | 0.40493894 | 0.000398 | 0              | 0              |
| Q9JHF7 | Hpgds   | Hematopoietic prostaglandin D synthase               | 113.844  | 22.11 | 23227  | 3  | 0 | 0.67667753 | 0.007943 | 1.7582277e-309 | 0              |
| Q9JHJ3 | Gimp    | Glycosylated lysosomal membrane protein              | 116.49   | 13.12 | 43804  | 3  | 0 | 0.70883403 | 0.028622 | 4.2159035E-135 | 1.8052967E-207 |
| Q9JHS3 | Lamtor2 | Ragulator complex protein LAMTOR2                    | 122.42   | 21.6  | 13480  | 2  | 0 | 0.61974737 | 0.017008 | 8.7392192E-196 | 9.7680014E-306 |
| Q9JJU8 | Sh3bgrl | SH3 domain-binding glutamic acid-rich-like protein   | 216.988  | 70.18 | 12811  | 6  | 0 | 0.77278647 | 0.021472 | 1.0918873E-169 | 7.1608017E-262 |
| Q9JJZ4 | Ube2j1  | Ubiquitin-conjugating enzyme E2 J1                   | 38.103   | 6.92  | 34990  | 2  | 0 | 1.58512159 | 0.001628 | 0              | 0              |
| Q9JK81 | Myg1    | UPF0160 protein MYG1, mitochondrial                  | 343.682  | 30.53 | 42723  | 8  | 0 | 0.80861539 | 0.004722 | 0              | 0              |
| Q9JKP5 | Mbnl1   | Muscleblind-like protein 1                           | 28.027   | 6.45  | 36976  | 2  | 0 | 0.75000913 | 0.010807 | 2.9875601E-251 | 0              |
| Q9JKR6 | Hyou1   | Hypoxia up-regulated protein 1                       | 1066.388 | 39.14 | 111181 | 29 | 0 | 1.31654352 | 0.006069 | 0              | 0              |
| Q9JL26 | Fmn1    | Formin-like protein 1                                | 999.021  | 31.9  | 122060 | 29 | 0 | 0.90223488 | 0.016373 | 7.5335696E-199 | 4.6603188e-311 |
| Q9JLJ2 | Aldh9a1 | 4-trimethylaminobutyraldehyde dehydrogenase          | 687.374  | 69.64 | 53515  | 21 | 0 | 0.91014628 | 0.060842 | 2.4892117E-46  | 1.6253582E-80  |
| Q9JM14 | Nt5c    | 5'(3')-deoxyribonucleotidase, cytosolic type         | 114.573  | 27.5  | 23076  | 3  | 0 | 0.77068709 | 0.029539 | 7.1662314E-128 | 1.7172618E-196 |
| Q9JM76 | Arpc3   | Actin-related protein 2/3 complex subunit 3          | 357.381  | 69.1  | 20525  | 13 | 0 | 0.8404013  | 0.005793 | 0              | 0              |
| Q9JM90 | Stap1   | Signal-transducing adaptor protein 1                 | 483.469  | 61.28 | 34628  | 14 | 0 | 1.37551934 | 0.049928 | 6.4655396E-63  | 5.5779284E-103 |

|        |         |                                                                      |          |       |       |    |   |            |          |                |                |
|--------|---------|----------------------------------------------------------------------|----------|-------|-------|----|---|------------|----------|----------------|----------------|
| Q9JMH6 | Txnrd1  | Thioredoxin reductase 1, cytoplasmic                                 | 304.448  | 20.23 | 67084 | 7  | 0 | 1.30055549 | 0.036213 | 2.5826507E-105 | 4.0236621E-163 |
| Q9QWR8 | Naga    | Alpha-N-acetylgalactosaminidase                                      | 268.096  | 27.47 | 47235 | 10 | 0 | 0.63423713 | 0.029468 | 2.2101489E-128 | 2.8834339E-197 |
| Q9QYL8 | Lypla2  | Acyl-protein thioesterase 2                                          | 65.824   | 31.17 | 24807 | 3  | 0 | 0.5165359  | 0.018526 | 1.6230753E-185 | 3.5876897E-288 |
| Q9QZ88 | Vps29   | Vacuolar protein sorting-associated protein 29                       | 189.181  | 40.66 | 20496 | 6  | 0 | 0.82874225 | 0.004686 | 0              | 0              |
| Q9R0Q8 | Clec4e  | C-type lectin domain family 4 member E                               | 43.575   | 12.15 | 24431 | 2  | 0 | 5.52556332 | 0.014633 | 6.1409741E-212 | 0              |
| Q9R0X4 | Acot9   | Acyl-coenzyme A thioesterase 9, mitochondrial                        | 118.054  | 18.22 | 50560 | 6  | 0 | 1.23601496 | 0.049875 | 2.7144944E-63  | 1.7004053E-103 |
| Q9R1P4 | Psma1   | Proteasome subunit alpha type-1                                      | 404.874  | 72.24 | 29547 | 15 | 0 | 0.88124919 | 0.015112 | 8.5554355E-204 | 9.7074018E-320 |
| Q9R1T2 | Sae1    | SUMO-activating enzyme subunit 1                                     | 585.544  | 59.71 | 38620 | 16 | 0 | 0.83551501 | 0.006427 | 3.409053E-322  | 0              |
| Q9R233 | Tapbp   | Tapasin                                                              | 125.12   | 16.56 | 49736 | 6  | 0 | 1.4209438  | 0.010109 | 1.8547277E-268 | 0              |
| Q9WTK5 | Nfkb2   | Nuclear factor NF-kappa-B p100 subunit                               | 69.018   | 2.89  | 96832 | 2  | 0 | 1.64013063 | 0.00274  | 0              | 0              |
| Q9WTP6 | Ak2     | Adenylate kinase 2, mitochondrial                                    | 334.009  | 47.28 | 26469 | 8  | 0 | 0.87741877 | 0.075898 | 5.9293603E-27  | 6.43545E-55    |
| Q9WU78 | Pdcd6ip | Programmed cell death 6-interacting protein                          | 1224.259 | 53.39 | 96024 | 35 | 0 | 0.8338587  | 0.0034   | 0              | 0              |
| Q9WU81 | Slc37a2 | Glucose-6-phosphate exchanger SLC37A2                                | 189.923  | 12.38 | 55073 | 4  | 0 | 0.74221806 | 0.008623 | 1.0313925E-284 | 0              |
| Q9WUA3 | Pfkip   | ATP-dependent 6-phosphofructokinase, platelet type                   | 1753.233 | 65.31 | 85455 | 44 | 0 | 1.08061681 | 0.016728 | 2.1388555E-196 | 8.5158207E-307 |
| Q9WUM3 | Coro1b  | Coronin-1B                                                           | 170.612  | 30.17 | 53912 | 7  | 0 | 0.81308873 | 0.046786 | 4.5981909E-69  | 1.8856168E-111 |
| Q9WUM5 | Suc1g1  | Succinate--CoA ligase [ADP/GDP-forming] subunit alpha, mitochondrial | 257.113  | 25.72 | 36155 | 7  | 0 | 0.88878574 | 0.01089  | 7.2235172E-248 | 0              |
| Q9WUU7 | Ctsz    | Cathepsin Z                                                          | 406.55   | 49.67 | 33996 | 11 | 0 | 0.7994102  | 0.007368 | 3.4822518E-316 | 0              |
| Q9WV54 | Asah1   | Acid ceramidase                                                      | 610.897  | 45.18 | 44670 | 17 | 0 | 0.72885311 | 0.029269 | 5.1035937E-133 | 2.670168E-204  |
| Q9WVA4 | Tagln2  | Transgelin-2                                                         | 924.244  | 84.42 | 22395 | 24 | 0 | 0.84456508 | 0.044248 | 1.2451795E-72  | 1.9939039E-116 |

|        |          |                                                            |          |       |        |    |   |            |          |                |                |
|--------|----------|------------------------------------------------------------|----------|-------|--------|----|---|------------|----------|----------------|----------------|
| Q9WVQ5 | Apip     | Methylthioribulose-1-phosphate dehydratase                 | 113.666  | 9.13  | 26949  | 2  | 0 | 0.62272704 | 0.090111 | 5.8101445E-15  | 1.9631592E-38  |
| Q9Z0J0 | Npc2     | NPC intracellular cholesterol transporter 2                | 140.289  | 41.61 | 16442  | 5  | 0 | 0.67635301 | 0.026991 | 1.4343135E-143 | 1.6726267E-220 |
| Q9Z0P5 | Twf2     | Twinfilin-2                                                | 458.829  | 52.44 | 39471  | 11 | 0 | 0.84649057 | 0.010913 | 7.8208921E-244 | 0              |
| Q9Z110 | Aldh18a1 | Delta-1-pyrroline-5-carboxylate synthase                   | 631.966  | 28.43 | 87266  | 17 | 0 | 1.26538525 | 0.004489 | 0              | 0              |
| Q9Z1F9 | Uba2     | SUMO-activating enzyme subunit 2                           | 577.522  | 38.09 | 70569  | 16 | 0 | 0.79487429 | 0.033468 | 7.1756142E-116 | 1.4542307E-178 |
| Q9Z277 | Baz1b    | Tyrosine-protein kinase BAZ1B                              | 36.765   | 1.89  | 170651 | 2  | 0 | 0.75517913 | 0.076797 | 3.4126496E-24  | 3.4312438E-51  |
| Q9Z2L0 | Vdac1    | Voltage-dependent anion-selective channel protein 1        | 927.384  | 69.61 | 30756  | 16 | 0 | 1.20646332 | 0.007399 | 1.088333e-314  | 0              |
| A2AGT5 | Ckap5    | Cytoskeleton-associated protein 5                          | 272.831  | 6.55  | 225635 | 12 | 1 | 1.07867675 | 0.10644  | 6.000189E-06   | 1.4953944E-24  |
| A2RSY6 | Trmt1l   | TRMT1-like protein                                         | 90.625   | 4.4   | 80861  | 2  | 1 | 0.71207349 | 0.209969 | 1              | 0.97229942     |
| B0BNG0 | Emc2     | ER membrane protein complex subunit 2                      | 111.856  | 8.42  | 34870  | 2  | 1 | 1.24121831 | 0.04313  | 3.0533869E-74  | 1.0743056E-118 |
| B2RX12 | Abcc3    | Canalicular multispecific organic anion transporter 2      | 272.445  | 7.88  | 169124 | 7  | 1 | 0.77565525 | 0.104211 | 7.9432841E-07  | 4.6905056E-26  |
| E9Q1P8 | Irf2bp2  | Interferon regulatory factor 2-binding protein 2           | 130.928  | 11.58 | 59292  | 4  | 1 | 0.86138203 | 0.027937 | 2.9839883E-138 | 2.7393445E-212 |
| O35130 | Emg1     | Ribosomal RNA small subunit methyltransferase NEP1         | 98.513   | 18.85 | 26974  | 3  | 1 | 1.81666168 | 0.018701 | 9.9603082E-184 | 3.7734571E-285 |
| O35239 | Ptpn9    | Tyrosine-protein phosphatase non-receptor type 9           | 99.563   | 10.29 | 67970  | 4  | 1 | 0.48086682 | 0.015112 | 3.573814E-203  | 1.223855e-318  |
| O35264 | Pafah1b2 | Platelet-activating factor acetylhydrolase IB subunit beta | 163.641  | 36.68 | 25581  | 4  | 1 | 0.70881927 | 0.04313  | 1.201658E-74   | 2.8869889E-119 |
| O35286 | Dhx15    | Pre-mRNA-splicing factor ATP-dependent RNA helicase DHX15  | 433.044  | 24.91 | 91007  | 16 | 1 | 1.03264499 | 0.051189 | 4.7907242E-61  | 1.9735819E-100 |
| O35639 | Anxa3    | Annexin A3                                                 | 1159.261 | 73.99 | 36384  | 27 | 1 | 0.9106291  | 0.047765 | 9.9389397E-67  | 3.1990613E-108 |

|        |         |                                                                   |         |       |        |    |   |            |          |                |                |
|--------|---------|-------------------------------------------------------------------|---------|-------|--------|----|---|------------|----------|----------------|----------------|
| O35643 | Ap1b1   | AP-1 complex subunit beta-1                                       | 982.506 | 39.45 | 103935 | 25 | 1 | 0.89244327 | 0.02442  | 6.5762352E-159 | 1.3699479E-244 |
| O35685 | Nudc    | Nuclear migration protein nudC                                    | 347.061 | 32.83 | 38358  | 9  | 1 | 1.16864366 | 0.055167 | 4.5236527E-52  | 3.2480443E-88  |
| O54924 | Exoc8   | Exocyst complex component 8                                       | 44.609  | 5.03  | 81043  | 2  | 1 | 0.86180525 | 0.084476 | 2.581931E-19   | 1.6586653E-44  |
| O70251 | Eef1b   | Elongation factor 1-beta                                          | 229.088 | 40.89 | 24694  | 6  | 1 | 1.17876384 | 0.053405 | 3.6209404E-54  | 4.5423729E-91  |
| O70435 | Psma3   | Proteasome subunit alpha type-3                                   | 399.733 | 37.25 | 28405  | 8  | 1 | 0.94088869 | 0.066408 | 2.3878162E-39  | 2.9312176E-71  |
| O88342 | Wdr1    | WD repeat-containing protein 1                                    | 1015.99 | 62.38 | 66407  | 24 | 1 | 0.89773927 | 0.036757 | 1.6453248E-102 | 4.5463082E-159 |
| O88531 | Ppt1    | Palmitoyl-protein thioesterase 1                                  | 424.343 | 35.29 | 34490  | 10 | 1 | 0.73692126 | 0.08022  | 2.4237391E-21  | 2.6854219E-47  |
| O89044 | Prim2   | DNA primase large subunit                                         | 90.342  | 4.93  | 58603  | 2  | 1 | 0.8141836  | 0.089294 | 1.4974319E-15  | 2.8701841E-39  |
| P01896 |         | H-2 class I histocompatibility antigen, alpha chain Heterogeneous | 107.51  | 27.03 | 20454  | 4  | 1 | 1.21040437 | 0.042364 | 2.4659371E-78  | 1.8391694E-124 |
| P04256 | Hnrnpa1 | nuclear ribonucleoprotein A1                                      | 841.217 | 49.38 | 34212  | 18 | 1 | 0.87995225 | 0.076016 | 1.108623E-25   | 3.2980694E-53  |
| P09527 | Rab7a   | Ras-related protein Rab-7a                                        | 710.488 | 74.88 | 23504  | 17 | 1 | 0.93000795 | 0.027077 | 1.9682367E-141 | 3.3801467E-217 |
| P10810 | Cd14    | Monocyte differentiation antigen CD14                             | 612.498 | 50.55 | 39204  | 14 | 1 | 1.11535345 | 0.061285 | 1.1266516E-45  | 1.207931E-79   |
| P16332 | Mut     | Methylmalonyl-CoA mutase, mitochondrial                           | 107.713 | 7.35  | 82844  | 4  | 1 | 1.17406184 | 0.029207 | 1.5431679E-133 | 4.3414561E-205 |
| P21708 | Mapk3   | Mitogen-activated protein kinase 3                                | 616.377 | 62.37 | 43081  | 17 | 1 | 0.82574926 | 0.037117 | 9.7294378E-100 | 4.5354224E-155 |
| P22437 | Ptgs1   | Prostaglandin G/H synthase 1                                      | 696.456 | 49.17 | 69042  | 19 | 1 | 0.80679997 | 0.033979 | 1.8244182E-112 | 1.4603972E-173 |
| P23492 | Pnp     | Purine nucleoside phosphorylase                                   | 251.547 | 31.49 | 32277  | 7  | 1 | 0.85494088 | 0.055562 | 2.2194434E-51  | 2.7930813E-87  |
| P24668 | M6pr    | Cation-dependent mannose-6-phosphate receptor                     | 311.197 | 29.86 | 31172  | 8  | 1 | 1.0702246  | 0.054383 | 9.133995E-53   | 3.6951805E-89  |
| P26151 | Fcgr1   | High affinity immunoglobulin gamma Fc receptor I                  | 103.29  | 10.4  | 44888  | 3  | 1 | 0.80731859 | 0.02442  | 3.1098494E-157 | 6.1158854E-242 |

|        |          |                                                                                   |          |       |        |    |   |            |          |                |                |
|--------|----------|-----------------------------------------------------------------------------------|----------|-------|--------|----|---|------------|----------|----------------|----------------|
| P27867 | Sord     | Sorbitol dehydrogenase                                                            | 47.078   | 7.28  | 38235  | 2  | 1 | 0.79666368 | 0.032106 | 8.1551917E-120 | 2.1220275E-184 |
| P27870 | Vav1     | Proto-oncogene vav                                                                | 714.634  | 30.77 | 98137  | 20 | 1 | 1.13311384 | 0.061997 | 1.0655178E-44  | 2.3959637E-78  |
| P28271 | Aco1     | Cytoplasmic aconitate hydratase                                                   | 290.564  | 15.86 | 98126  | 8  | 1 | 0.81973226 | 0.018481 | 4.0996018E-186 | 3.4923688E-289 |
| P28667 | Marcksl1 | MARCKS-related protein                                                            | 68.906   | 17.5  | 20165  | 3  | 1 | 1.55010246 | 0.029274 | 5.5492139E-132 | 9.9698887E-203 |
| P29314 | Rps9     | 40S ribosomal protein S9                                                          | 270.149  | 44.85 | 22591  | 13 | 1 | 1.20400384 | 0.040894 | 2.2697149E-83  | 1.3326255E-131 |
| P29418 | Atp5f1e  | ATP synthase subunit epsilon, mitochondrial                                       | 2.148    | 29.41 | 5767   | 2  | 1 | 0.62587349 | 0.042765 | 1.6524615E-77  | 2.6851238E-123 |
| P30204 | Msr1     | Macrophage scavenger receptor types I and II CD204                                | 167.547  | 11.79 | 50170  | 6  | 1 | 1.38884586 | 0.019838 | 1.3859043E-179 | 3.4309988E-278 |
| P32067 | Ssb      | Lupus La protein homolog                                                          | 467.172  | 32.29 | 47756  | 13 | 1 | 0.92837705 | 0.115695 | 0.0042094699   | 4.542893E-19   |
| P35285 | Rab22a   | Ras-related protein Rab-22A                                                       | 73.206   | 22.16 | 21802  | 3  | 1 | 0.87045196 | 0.074341 | 4.8165308E-32  | 1.191176E-61   |
| P36876 | Ppp2r2a  | Serine/threonine-protein phosphatase 2A 55 kDa regulatory subunit B alpha isoform | 291.297  | 21.92 | 51678  | 8  | 1 | 1.12963964 | 0.034563 | 4.644855E-110  | 4.9189659E-170 |
| P42932 | Cct8     | T-complex protein 1 subunit theta                                                 | 1318.426 | 61.86 | 59555  | 32 | 1 | 1.10871898 | 0.071286 | 2.6262049E-34  | 1.2733295E-64  |
| P46413 | Gss      | Glutathione synthetase                                                            | 90.551   | 11.6  | 52345  | 4  | 1 | 0.70146263 | 0.078828 | 1.6475141E-22  | 6.7628213E-49  |
| P50408 | Atp6v1f  | V-type proton ATPase subunit F                                                    | 178.96   | 57.98 | 13370  | 5  | 1 | 0.67647276 | 0.143349 | 1              | 3.389151E-08   |
| P50428 | Arsa     | Arylsulfatase A                                                                   | 16.653   | 8.89  | 53748  | 2  | 1 | 0.47864197 | 0.065553 | 5.8136309E-40  | 4.535092E-72   |
| P52019 | Sqle     | Squalene monooxygenase                                                            | 95.834   | 4.9   | 63770  | 2  | 1 | 1.27542822 | 0.037233 | 4.2979393E-96  | 8.1983737E-150 |
| P52431 | Pold1    | DNA polymerase delta catalytic subunit                                            | 339.844  | 14.03 | 123790 | 12 | 1 | 0.87357979 | 0.030301 | 7.4892881E-127 | 5.984354E-195  |
| P58044 | Idi1     | Isopentenyl-diphosphate Delta-isomerase 1                                         | 119.261  | 24.67 | 26289  | 4  | 1 | 0.8109032  | 0.034907 | 4.1986387E-109 | 1.2309982E-168 |
| P61028 | Rab8b    | Ras-related protein Rab-8B                                                        | 303.135  | 44.44 | 23603  | 9  | 1 | 1.17323971 | 0.017016 | 3.5641949E-195 | 1.1069035E-304 |
| P61107 | Rab14    | Ras-related protein Rab-14                                                        | 457.453  | 73.02 | 23927  | 13 | 1 | 0.84012067 | 0.041148 | 4.2427115E-82  | 8.5094746E-130 |

|        |         |                                                                                                                  |         |       |       |    |   |            |          |                |                |
|--------|---------|------------------------------------------------------------------------------------------------------------------|---------|-------|-------|----|---|------------|----------|----------------|----------------|
| P61255 | Rpl26   | 60S ribosomal protein L26                                                                                        | 205.138 | 39.31 | 17258 | 8  | 1 | 1.12379508 | 0.037231 | 5.3383653E-97  | 4.0387835E-151 |
| P61804 | Dad1    | Dolichyl-diphosphooligosaccharide--protein glycosyltransferase subunit DAD1                                      | 80.636  | 19.47 | 12497 | 3  | 1 | 1.21269414 | 0.03144  | 2.6168126E-122 | 4.0665034E-188 |
| P62141 | Ppp1cb  | Serine/threonine-protein phosphatase PP1-beta catalytic subunit                                                  | 490.999 | 33.94 | 37187 | 9  | 1 | 0.86342144 | 0.05209  | 3.3531989E-59  | 6.4326053E-98  |
| P62309 | Snrpg   | Small nuclear ribonucleoprotein G                                                                                | 56.483  | 26.32 | 8496  | 2  | 1 | 0.54437178 | 0.040894 | 6.0366668E-83  | 5.3371172E-131 |
| P62317 | Snrpd2  | Small nuclear ribonucleoprotein Sm D2                                                                            | 180.707 | 52.54 | 13527 | 7  | 1 | 0.83642344 | 0.102192 | 9.0437144E-08  | 1.3022141E-27  |
| P62843 | Rps15   | 40S ribosomal protein S15                                                                                        | 111.328 | 28.28 | 17040 | 3  | 1 | 0.4124668  | 0.086871 | 8.3573121E-18  | 2.0198981E-42  |
| P62869 | Elob    | Elongin-B                                                                                                        | 274.104 | 59.32 | 13170 | 7  | 1 | 0.86264413 | 0.042765 | 4.2636969E-77  | 1.020146E-122  |
| P62962 | Pfn1    | Profilin-1                                                                                                       | 700.956 | 91.43 | 14957 | 16 | 1 | 0.90043415 | 0.066408 | 1.9512214E-38  | 4.6978742E-70  |
| P63081 | Atp6v0c | V-type proton ATPase 16 kDa proteolipid subunit c                                                                | 144.756 | 31.61 | 15808 | 2  | 1 | 0.32211682 | 0.034563 | 1.5401868E-110 | 9.7912577E-171 |
| P63085 | Mapk1   | Mitogen-activated protein kinase 1                                                                               | 445.944 | 63.69 | 41276 | 15 | 1 | 0.8443241  | 0.04762  | 1.6709824E-67  | 2.7322453E-109 |
| P63276 | Rps17   | 40S ribosomal protein S17                                                                                        | 395.75  | 59.26 | 15524 | 10 | 1 | 0.82002543 | 0.024382 | 1.02355E-161   | 4.9238776E-249 |
| P63280 | Ube2i   | SUMO-conjugating enzyme UBC9                                                                                     | 104.874 | 34.18 | 18007 | 4  | 1 | 0.84553714 | 0.049632 | 4.7523609E-64  | 1.5636067E-104 |
| P84096 | Rhog    | Rho-related GTP-binding protein RhoG                                                                             | 411.779 | 51.83 | 21309 | 9  | 1 | 0.86901807 | 0.046522 | 7.5263892E-70  | 1.5374681E-112 |
| P97315 | Csrp1   | Cysteine and glycine-rich protein 1                                                                              | 254.274 | 50.78 | 20583 | 6  | 1 | 0.87918395 | 0.07505  | 4.7766156E-29  | 1.0417191E-57  |
| Q01205 | Dlst    | Dihydrolipoyllysine-residue succinyltransferase component of 2-oxoglutarate dehydrogenase complex, mitochondrial | 264.324 | 19.16 | 48925 | 8  | 1 | 1.1986916  | 0.066408 | 9.7112801E-39  | 1.8668166E-70  |
| Q02765 | Ctss    | Cathepsin S                                                                                                      | 37.975  | 6.97  | 36833 | 2  | 1 | 0.71999641 | 0.078053 | 3.1783484E-23  | 7.1316289E-50  |

|        |         |                                                         |         |       |        |    |   |            |          |                |                |
|--------|---------|---------------------------------------------------------|---------|-------|--------|----|---|------------|----------|----------------|----------------|
| Q3U7R1 | Esyt1   | Extended synaptotagmin-1                                | 422.369 | 14.65 | 121554 | 11 | 1 | 1.14656726 | 0.035732 | 3.3474674E-107 | 7.3307636E-166 |
| Q4V8K5 | Brox    | BRO1 domain-containing protein                          | 159.807 | 18.98 | 46192  | 6  | 1 | 0.77399809 | 0.030558 | 7.98669E-125   | 6.7256401E-192 |
| Q4VA53 | Pds5b   | Sister chromatid cohesion protein PDS5 homolog B        | 468.027 | 10.44 | 164419 | 11 | 1 | 0.85796872 | 0.022784 | 2.1495652E-167 | 3.8356876E-258 |
| Q571E4 | Galns   | N-acetylgalactosamine-6-sulfatase                       | 163.699 | 25.77 | 57673  | 7  | 1 | 0.56485818 | 0.085321 | 1.1650402E-18  | 1.3204172E-43  |
| Q5BJS0 | Dhx30   | ATP-dependent RNA helicase DHX30                        | 86.006  | 3.02  | 133997 | 3  | 1 | 1.29813725 | 0.232579 | 1              | 0.99995601     |
| Q5SF07 | Igf2bp2 | Insulin-like growth factor 2 mRNA-binding protein 2     | 92.866  | 4.56  | 65584  | 2  | 1 | 0.82227161 | 0.101221 | 1.2470658E-08  | 5.4927386E-29  |
| Q5XI72 | Eif4h   | Eukaryotic translation initiation factor 4H             | 172.757 | 27.02 | 27324  | 5  | 1 | 0.82820952 | 0.038013 | 5.9573176E-93  | 2.8045227E-145 |
| Q5XI81 | Fxr1    | Fragile X mental retardation syndrome-related protein 1 | 163.162 | 6.16  | 63947  | 3  | 1 | 1.13223172 | 0.096954 | 3.6072061E-10  | 2.2743422E-31  |
| Q60770 | Stxbp3  | Syntaxin-binding protein 3                              | 185.306 | 17.74 | 67942  | 8  | 1 | 0.81712725 | 0.024416 | 3.7440378E-161 | 3.8452293E-248 |
| Q61187 | Tsg101  | Tumor susceptibility gene 101 protein                   | 84.606  | 12.28 | 44124  | 4  | 1 | 0.82053754 | 0.04313  | 1.8489261E-75  | 2.0684639E-120 |
| Q62048 | Pea15   | Astrocytic phosphoprotein PEA-15                        | 224.718 | 70.77 | 15054  | 6  | 1 | 0.61998911 | 0.026991 | 4.170343E-144  | 2.475601E-221  |
| Q62261 | Sptbn1  | Spectrin beta chain, non-erythrocytic 1                 | 232.782 | 5.46  | 274223 | 9  | 1 | 0.8169848  | 0.040257 | 1.1909494E-84  | 2.008736E-133  |
| Q63060 | Gk      | Glycerol kinase                                         | 23.058  | 3.82  | 57477  | 2  | 1 | 1.47420195 | 0.037231 | 1.5163122E-96  | 1.82167E-150   |
| Q63584 | Tmed10  | Transmembrane emp24 domain-containing protein 10        | 373.401 | 35.16 | 24858  | 7  | 1 | 1.13917231 | 0.044248 | 3.1293287E-72  | 7.2578626E-116 |
| Q642C0 | Dnajc8  | DnaJ homolog subfamily C member 8                       | 90.595  | 27.67 | 29813  | 4  | 1 | 0.84375189 | 0.029996 | 2.318982E-127  | 1.0187497E-195 |
| Q64578 | Atp2a1  | Sarcoplasmic/endoplasmic reticulum calcium ATPase 1     | 254.77  | 9.76  | 109409 | 6  | 1 | 1.15304747 | 0.062616 | 4.2944043E-43  | 3.2531806E-76  |
| Q68FH4 | Galk2   | N-acetylgalactosamine kinase                            | 137.369 | 16.38 | 50503  | 4  | 1 | 0.72804811 | 0.037233 | 1.2156888E-95  | 3.6774616E-149 |



|        |          |                                                                                                          |         |       |        |    |   |            |          |                |                |
|--------|----------|----------------------------------------------------------------------------------------------------------|---------|-------|--------|----|---|------------|----------|----------------|----------------|
| Q6DVA0 | Lemd2    | LEM domain-containing protein 2                                                                          | 35.137  | 4.5   | 57507  | 2  | 1 | 1.37632587 | 0.071651 | 5.0827666E-34  | 3.0326748E-64  |
| Q6NS46 | Pdcd11   | Protein RRP5 homolog                                                                                     | 162.864 | 4.51  | 207779 | 7  | 1 | 1.10250993 | 0.089079 | 9.4756112E-16  | 1.5040482E-39  |
| Q6P8X1 | Snx6     | Sorting nexin-6                                                                                          | 162.194 | 18.47 | 46649  | 8  | 1 | 0.63450878 | 0.039706 | 5.6048372E-89  | 1.3515347E-139 |
| Q6PE01 | Snrnp40  | U5 small nuclear ribonucleoprotein 40 kDa protein                                                        | 172.828 | 19.55 | 39276  | 4  | 1 | 0.86794205 | 0.019838 | 2.0809636E-178 | 3.116988E-276  |
| Q6PGH2 | Jpt2     | Jupiter microtubule associated homolog 2                                                                 | 33.619  | 14.74 | 20020  | 2  | 1 | 0.7231985  | 0.163964 | 1              | 0.013036864    |
| Q794E4 | Hnrnpf   | Heterogeneous nuclear ribonucleoprotein F                                                                | 906.329 | 65.78 | 45730  | 19 | 1 | 0.91455078 | 0.025399 | 4.606396E-150  | 1.2401414E-230 |
| Q7TMR0 | Prpc     | Lysosomal Pro-X carboxypeptidase                                                                         | 92.213  | 13.85 | 55027  | 3  | 1 | 0.73960435 | 0.039645 | 2.7060308E-90  | 1.8048063E-141 |
| Q7TSV4 | Pgm2     | Phosphoglucomutase -2                                                                                    | 82.058  | 12.42 | 68748  | 4  | 1 | 0.56205647 | 0.041187 | 2.9562635E-81  | 1.3365445E-128 |
| Q80TH2 | Erbin    | Erbin                                                                                                    | 56.959  | 3.64  | 157248 | 3  | 1 | 0.78645066 | 0.041187 | 7.7783181E-81  | 5.2720122E-128 |
| Q80W54 | Zmpste24 | CAAX prenyl protease 1 homolog                                                                           | 94.956  | 13.26 | 54735  | 4  | 1 | 1.28830192 | 0.03467  | 1.3979257E-109 | 2.4656611E-169 |
| Q810B6 | Ankfy1   | Rabankyrin-5                                                                                             | 529.491 | 16.6  | 128653 | 12 | 1 | 0.87435635 | 0.039706 | 4.1825185E-88  | 2.3675902E-138 |
| Q8BMF4 | Dlat     | Dihydrolipoyllysine-residue acetyltransferase component of pyruvate dehydrogenase complex, mitochondrial | 477.868 | 30.53 | 67942  | 12 | 1 | 1.11997786 | 0.057492 | 1.0787368E-50  | 2.3685473E-86  |
| Q8BP40 | Acp6     | Lysophosphatidic acid phosphatase type 6                                                                 | 157.119 | 18.9  | 47625  | 5  | 1 | 0.74473339 | 0.036801 | 4.7915418E-102 | 2.1275822E-158 |
| Q8BQZ4 | Ralgapb  | Ral GTPase-activating protein subunit beta                                                               | 89.737  | 4.25  | 165200 | 3  | 1 | 1.51203888 | 0.141964 | 1              | 1.2516375E-08  |
| Q8BV66 | Ifi44    | Interferon-induced protein 44                                                                            | 59.537  | 5.92  | 47852  | 2  | 1 | 1.63881176 | 0.155368 | 1              | 0.00025260713  |
| Q8BVI4 | Qdpr     | Dihydropteridine reductase                                                                               | 216.144 | 31.12 | 25570  | 5  | 1 | 0.81070874 | 0.028622 | 3.7867806E-136 | 4.5685089E-209 |
| Q8BYA0 | Tbcd     | Tubulin-specific chaperone D                                                                             | 47.165  | 1.59  | 133321 | 2  | 1 | 1.18291059 | 0.0294   | 1.9603303E-130 | 2.229177E-200  |
| Q8BZW8 | Nhlrc2   | NHL repeat-containing protein 2                                                                          | 86.826  | 3.17  | 78430  | 2  | 1 | 1.50029258 | 0.095966 | 1.7134936E-10  | 7.2983064E-32  |

|        |          |                                                                                 |         |       |        |    |   |            |          |                |                |
|--------|----------|---------------------------------------------------------------------------------|---------|-------|--------|----|---|------------|----------|----------------|----------------|
| Q8CCH2 | Nhlrc3   | NHL repeat-containing protein 3                                                 | 234.33  | 30.55 | 38195  | 6  | 1 | 0.75879899 | 0.035202 | 1.1236972E-107 | 1.4938511E-166 |
| Q8CGK3 | Lonp1    | Lon protease homolog, mitochondrial                                             | 813.421 | 32.67 | 105843 | 22 | 1 | 1.1532312  | 0.036734 | 5.6380564E-103 | 9.6870684E-160 |
| Q8CHP8 | Pgp      | Glycerol-3-phosphate phosphatase                                                | 163.498 | 22.43 | 34541  | 4  | 1 | 0.59455365 | 0.0147   | 1.5494204E-207 | 0              |
| Q8CI43 | Myl6b    | Myosin light chain 6B                                                           | 57.825  | 11.59 | 22749  | 2  | 1 | 0.78142546 | 0.021565 | 4.1016046E-169 | 6.2202077E-261 |
| Q8K0F1 | Tbc1d23  | TBC1 domain family member 23                                                    | 84.48   | 7.02  | 76426  | 2  | 1 | 0.56529094 | 0.101721 | 1.7481843E-08  | 9.3671433E-29  |
| Q8K2I4 | Manba    | Beta-mannosidase                                                                | 232.516 | 13.54 | 100831 | 8  | 1 | 0.56414211 | 0.039706 | 8.3910285E-87  | 1.7047363E-136 |
| Q8R0H9 | Gga1     | ADP-ribosylation factor-binding protein GGA1                                    | 67.638  | 9.76  | 69972  | 2  | 1 | 0.67697231 | 0.08503  | 4.2783188E-19  | 3.3227057E-44  |
| Q8R1I1 | Uqcr10   | Cytochrome b-c1 complex subunit 9                                               | 85.36   | 37.5  | 7446   | 2  | 1 | 1.22211378 | 0.026222 | 2.9230969E-146 | 1.1178919E-224 |
| Q8R5A3 | Apbb1ip  | Amyloid beta A4 precursor protein-binding family B member 1-interacting protein | 44.92   | 5.22  | 74319  | 3  | 1 | 0.7184927  | 0.052133 | 9.6294393E-58  | 6.1928177E-96  |
| Q8VDM6 | Hnnpul1  | Heterogeneous nuclear ribonucleoprotein U-like protein 1                        | 336.085 | 17.23 | 96002  | 11 | 1 | 0.78100228 | 0.057717 | 2.477244E-49   | 1.5779496E-84  |
| Q8VDV3 | Rab3il1  | Guanine nucleotide exchange factor for Rab-3A                                   | 81.456  | 10.97 | 42713  | 2  | 1 | 0.610927   | 0.074914 | 6.1366358E-31  | 3.3399401E-60  |
| Q99KN9 | Clint1   | Clathrin interactor 1                                                           | 207.204 | 12.68 | 68513  | 6  | 1 | 0.86355841 | 0.156618 | 1              | 0.00064660191  |
| Q99PD4 | Arpc1a   | Actin-related protein 2/3 complex subunit 1A                                    | 94.403  | 9.46  | 41599  | 3  | 1 | 0.70252964 | 0.105953 | 3.4196473E-06  | 5.635273E-25   |
| Q9CQ22 | Lamtor1  | Regulator complex protein LAMTOR1                                               | 139.49  | 52.8  | 17749  | 6  | 1 | 0.79491293 | 0.049666 | 1.1370777E-63  | 5.163113E-104  |
| Q9CQE8 | RTRAF    | RNA transcription, translation and transport factor protein                     | 265.853 | 27.46 | 28152  | 5  | 1 | 0.74750699 | 0.033122 | 2.4169594E-117 | 9.7796671E-181 |
| Q9CQN6 | Tmem14c  | Transmembrane protein 14C                                                       | 81.653  | 35.09 | 11642  | 2  | 1 | 1.2700383  | 0.037439 | 2.7167135E-94  | 3.2636762E-147 |
| Q9CR51 | Atp6v1g1 | V-type proton ATPase subunit G 1                                                | 167.366 | 22.88 | 13724  | 3  | 1 | 0.67643385 | 0.061315 | 2.3883102E-45  | 3.2778334E-79  |

|        |          |                                                                   |         |       |        |    |   |            |          |                |                |
|--------|----------|-------------------------------------------------------------------|---------|-------|--------|----|---|------------|----------|----------------|----------------|
| Q9CR62 | Slc25a11 | Mitochondrial 2-oxoglutarate/malate carrier protein               | 437.786 | 57.01 | 34155  | 15 | 1 | 1.13550691 | 0.050448 | 1.536514E-62   | 1.8247058E-102 |
| Q9CX56 | Psmid8   | 26S proteasome non-ATPase regulatory subunit 8                    | 192.496 | 34.28 | 39930  | 10 | 1 | 1.19650552 | 0.059966 | 1.1658366E-46  | 5.90501E-81    |
| Q9CXT8 | Pmpcb    | Mitochondrial-processing peptidase subunit beta                   | 57.009  | 6.34  | 54614  | 3  | 1 | 1.20617187 | 0.013202 | 1.6782597E-221 | 0              |
| Q9CZD3 | Gars     | Glycine--tRNA ligase                                              | 803.059 | 36.63 | 81878  | 22 | 1 | 1.16120729 | 0.063908 | 1.852161E-42   | 2.2652086E-75  |
| Q9D4H1 | Exoc2    | Exocyst complex component 2                                       | 32.172  | 2.06  | 103959 | 2  | 1 | 1.17644231 | 0.051189 | 2.0343073E-61  | 6.1550633E-101 |
| Q9D6K5 | Synj2bp  | Synaptojanin-2-binding protein                                    | 154.513 | 33.79 | 15815  | 4  | 1 | 1.27092642 | 0.051011 | 3.6432011E-62  | 5.9317907E-102 |
| Q9DBS1 | Tmem43   | Transmembrane protein 43                                          | 323.038 | 39    | 44783  | 12 | 1 | 1.23114194 | 0.039706 | 1.1389094E-87  | 9.8732656E-138 |
| Q9DC16 | Ergic1   | Endoplasmic reticulum-Golgi intermediate compartment protein 1    | 128.824 | 17.59 | 32562  | 4  | 1 | 1.30836558 | 0.028103 | 3.3747173E-137 | 1.1301291E-210 |
| Q9DC50 | Crot     | Peroxisomal carnitine O-octanoyltransferase                       | 63.466  | 6.54  | 70264  | 2  | 1 | 0.59539578 | 0.037174 | 8.0318525E-99  | 9.5115734E-154 |
| Q9EPK6 | Sil1     | Nucleotide exchange factor SIL1                                   | 144.397 | 13.98 | 52430  | 4  | 1 | 1.37542004 | 0.079257 | 2.8359867E-22  | 1.4220649E-48  |
| Q9ES52 | Inpp5d   | Phosphatidylinositol 3,4,5-trisphosphate 5-phosphatase 1          | 932.081 | 33.59 | 133542 | 29 | 1 | 0.93926367 | 0.052133 | 1.8051979E-58  | 6.3435121E-97  |
| Q9ESU6 | Brd4     | Bromodomain-containing protein 4                                  | 39.623  | 2.36  | 155895 | 3  | 1 | 0.72715427 | 0.092764 | 1.0183332E-12  | 3.3843039E-35  |
| Q9JHR7 | Ide      | Insulin-degrading enzyme                                          | 144.95  | 10.7  | 117772 | 7  | 1 | 0.82882629 | 0.037439 | 9.6652927E-95  | 7.3479639E-148 |
| Q9JII6 | Akr1a1   | Alcohol dehydrogenase [NADP(+)]                                   | 477.043 | 65.85 | 36587  | 17 | 1 | 0.88978403 | 0.035927 | 8.7411313E-106 | 8.3598418E-164 |
| Q9JK23 | Psmg1    | Proteasome assembly chaperone 1                                   | 110.485 | 12.8  | 33104  | 3  | 1 | 1.0598174  | 0.07505  | 2.5841E-29     | 4.6173682E-58  |
| Q9QUN7 | Tlr2     | Toll-like receptor 2                                              | 67.488  | 2.93  | 89449  | 2  | 1 | 1.29794238 | 0.033707 | 2.2129233E-115 | 7.6340487E-178 |
| Q9QY17 | Pacsin2  | Protein kinase C and casein kinase substrate in neurons 2 protein | 45.468  | 4.1   | 55978  | 2  | 1 | 0.61354344 | 0.075971 | 1.9281528E-26  | 3.1284536E-54  |

|        |          |                                                                            |          |       |        |    |   |            |          |                |                |
|--------|----------|----------------------------------------------------------------------------|----------|-------|--------|----|---|------------|----------|----------------|----------------|
| Q9Z0M5 | Lipa     | Lysosomal acid lipase/cholesteryl ester hydrolase                          | 246.757  | 32.75 | 45325  | 11 | 1 | 1.68498212 | 0.029468 | 6.8028377E-129 | 4.8312654E-198 |
| Q9Z1Q5 | Clic1    | Chloride intracellular channel protein 1                                   | 697.267  | 82.99 | 27013  | 16 | 1 | 0.93544533 | 0.031688 | 8.2841334E-122 | 2.2743116E-187 |
| A2AAY5 | Sh3pxd2b | SH3 and PX domain-containing protein 2B                                    | 31.872   | 3.96  | 101517 | 3  | 2 | 1.07477241 | 0.074901 | 3.2605928E-31  | 1.4575771E-60  |
| B0BNM1 | Naxe     | NAD(P)H-hydrate epimerase                                                  | 199.691  | 29.43 | 30891  | 4  | 2 | 0.58233722 | 0.040593 | 8.515525E-84   | 3.3056619E-132 |
| B2RQC6 | Cad      | CAD protein                                                                | 670.669  | 12.18 | 243238 | 18 | 2 | 1.13239778 | 0.092764 | 1.1534038E-11  | 1.2259433E-33  |
| B2RXR6 | Ankrd44  | Serine/threonine-protein phosphatase 6 regulatory ankyrin repeat subunit B | 292.332  | 9.87  | 107385 | 6  | 2 | 0.78993584 | 0.091781 | 1.905273E-13   | 2.9502505E-36  |
| D3ZLZ7 | Impdh1   | Inosine-5'-monophosphate dehydrogenase 1                                   | 75.457   | 5.06  | 55293  | 3  | 2 | 1.08493037 | 0.23935  | 1              | 0.99999763     |
| D4AE41 | Rbmx1    | RNA binding motif protein, X-linked-like-1                                 | 209.356  | 15.98 | 42250  | 7  | 2 | 0.91005714 | 0.088194 | 2.3606721E-16  | 2.1321576E-40  |
| F1M775 | Diaph1   | Protein diaphanous homolog 1                                               | 461.72   | 12.65 | 140409 | 12 | 2 | 1.162121   | 0.066408 | 4.8214107E-39  | 7.4047901E-71  |
| O08788 | Dctn1    | Dynactin subunit 1                                                         | 292.672  | 10.62 | 141676 | 9  | 2 | 0.86197908 | 0.078053 | 5.985596E-24   | 7.3773737E-51  |
| O08992 | Sdcbp    | Syntenin-1                                                                 | 99.91    | 21.07 | 32379  | 3  | 2 | 1.35209256 | 0.107451 | 1.3624285E-05  | 6.3534826E-24  |
| O35381 | Anp32a   | Acidic leucine-rich nuclear phosphoprotein 32 family member A              | 234.908  | 25.51 | 28538  | 8  | 2 | 0.78141831 | 0.039038 | 3.5501259E-91  | 9.9275776E-143 |
| O35593 | Psm14    | 26S proteasome non-ATPase regulatory subunit 14                            | 213.025  | 36.13 | 34577  | 5  | 2 | 1.06662868 | 0.093739 | 5.4867101E-11  | 1.2902186E-32  |
| O55125 | Nipsnap1 | Protein NipSnap homolog 1                                                  | 182.332  | 33.45 | 33363  | 5  | 2 | 0.85452189 | 0.047747 | 4.0798311E-67  | 9.3651469E-109 |
| O55142 | Rpl35a   | 60S ribosomal protein L35a                                                 | 50.285   | 27.27 | 12554  | 5  | 2 | 1.14233122 | 0.052965 | 1.1660451E-56  | 1.8422428E-94  |
| O55143 | Atp2a2   | Sarcoplasmic/endoplasmic reticulum calcium ATPase 2                        | 625.662  | 20.69 | 114858 | 16 | 2 | 1.17598738 | 0.070794 | 3.5682429E-35  | 9.248163E-66   |
| O70133 | Dhx9     | ATP-dependent RNA helicase A                                               | 1082.594 | 27.17 | 149475 | 30 | 2 | 0.8657253  | 0.027491 | 2.6179053E-139 | 6.4692055E-214 |

|        |         |                                                        |         |       |        |    |   |            |          |                |                |
|--------|---------|--------------------------------------------------------|---------|-------|--------|----|---|------------|----------|----------------|----------------|
| O70145 | Ncf2    | Neutrophil cytosol factor 2                            | 441.898 | 43.62 | 59485  | 17 | 2 | 0.85629811 | 0.067443 | 1.5593683E-37  | 7.3528153E-69  |
| O70172 | Pip4k2a | Phosphatidylinositol 5-phosphate 4-kinase type-2 alpha | 73.489  | 8.64  | 46152  | 3  | 2 | 0.66663557 | 0.289103 | 1              | 1              |
| O70200 | Aif1    | Allograft inflammatory factor 1                        | 194.268 | 21.77 | 16911  | 2  | 2 | 0.75021553 | 0.139945 | 1              | 3.4439099E-09  |
| O70311 | Nmt2    | Glycylpeptide N-tetradecanoyltransferase 2             | 138.266 | 12.1  | 60484  | 5  | 2 | 1.08690138 | 0.107451 | 2.3172592E-05  | 1.6443972E-23  |
| O70404 | Vamp8   | Vesicle-associated membrane protein 8                  | 106.163 | 30.69 | 11451  | 3  | 2 | 0.73822574 | 0.189836 | 1              | 0.48689244     |
| O88543 | Cops3   | COP9 signalosome complex subunit 3                     | 188.945 | 25.3  | 47832  | 6  | 2 | 0.89932029 | 0.103945 | 4.3354917E-07  | 1.7060041E-26  |
| O89086 | Rbm3    | RNA-binding protein 3                                  | 157.678 | 43.79 | 16605  | 5  | 2 | 0.65429422 | 0.047986 | 2.4158194E-66  | 1.0899968E-107 |
| P00173 | Cyb5a   | Cytochrome b5                                          | 126.291 | 41.04 | 15355  | 4  | 2 | 1.16188844 | 0.027077 | 5.7675125E-142 | 5.0683403E-218 |
| P00405 | Mtco2   | Cytochrome c oxidase subunit 2                         | 186.311 | 40.53 | 25976  | 7  | 2 | 0.73539259 | 0.058177 | 5.3909408E-49  | 4.4819358E-84  |
| P08207 | S100a10 | Protein S100-A10                                       | 70.036  | 27.84 | 11186  | 2  | 2 | 0.7634433  | 0.224396 | 1              | 0.99927289     |
| P08905 | Lyz2    | Lysozyme C-2                                           | 74.868  | 16.22 | 16689  | 2  | 2 | 1.49982537 | 0.10076  | 8.8691289E-09  | 3.2112091E-29  |
| P10649 | Gstm1   | Glutathione S-transferase Mu 1                         | 172.837 | 32.57 | 25970  | 6  | 2 | 0.80917902 | 0.126248 | 0.11230398     | 1.6139892E-15  |
| P11497 | Acaca   | Acetyl-CoA carboxylase 1                               | 257.096 | 4.65  | 265194 | 7  | 2 | 1.13145975 | 0.051856 | 1.4402351E-59  | 2.0371644E-98  |
| P11928 | Oas1a   | 2'-5'-oligoadenylate synthase 1A                       | 199.408 | 26.43 | 42429  | 6  | 2 | 1.28544556 | 0.087632 | 1.4770698E-16  | 1.1035589E-40  |
| P17439 | Gba     | Glucosylceramidase                                     | 172.323 | 19.61 | 57622  | 5  | 2 | 0.73599209 | 0.093488 | 3.7315858E-11  | 7.1935142E-33  |
| P21956 | Mfge8   | Lactadherin                                            | 107.297 | 12.31 | 51241  | 4  | 2 | 1.26826029 | 0.090111 | 9.0782127E-15  | 3.7042701E-38  |
| P23780 | Glb1    | Beta-galactosidase                                     | 558.879 | 27.36 | 73121  | 14 | 2 | 0.81655468 | 0.052965 | 2.6653173E-56  | 5.6573634E-94  |
| P25322 | Ccnd1   | G1/S-specific cyclin-D1                                | 26.402  | 7.46  | 33429  | 2  | 2 | 0.8954447  | 0.136431 | 1              | 2.1943979E-11  |
| P25799 | Nfkb1   | Nuclear factor NF-kappa-B p105 subunit                 | 127.435 | 8.34  | 105615 | 7  | 2 | 1.14646492 | 0.059212 | 2.5349319E-48  | 3.5706725E-83  |
| P26638 | Sars    | Serine--tRNA ligase, cytoplasmic                       | 962.88  | 54.3  | 58389  | 23 | 2 | 0.91515324 | 0.153223 | 1              | 7.7586462E-05  |
| P27546 | Map4    | Microtubule-associated protein 4                       | 360.388 | 16.8  | 117429 | 13 | 2 | 0.90454064 | 0.044381 | 7.8471348E-72  | 2.6356981E-115 |
| P28352 | Apex1   | DNA-(apurinic or apyrimidinic site) lyase              | 249.51  | 38.8  | 35490  | 8  | 2 | 0.81942804 | 0.092764 | 3.4723885E-12  | 2.0546485E-34  |

|        |          |                                                 |          |       |        |    |   |            |          |                |                |
|--------|----------|-------------------------------------------------|----------|-------|--------|----|---|------------|----------|----------------|----------------|
| P28650 | Adssl1   | Adenylosuccinate synthetase isozyme 1           | 216.936  | 24.07 | 50254  | 7  | 2 | 0.72875248 | 0.07025  | 2.4064253E-36  | 2.6983753E-67  |
| P28798 | Grn      | Granulins                                       | 274.292  | 20.54 | 63458  | 9  | 2 | 0.68462203 | 0.070807 | 6.9583173E-35  | 2.2215254E-65  |
| P29416 | Hexa     | Beta-hexosaminidase subunit alpha               | 457.711  | 32.95 | 60613  | 14 | 2 | 0.82144242 | 0.025528 | 6.9382656E-148 | 3.2340587E-227 |
| P40142 | Tkt      | Transketolase                                   | 1581.91  | 65.17 | 67630  | 37 | 2 | 0.8932322  | 0.03319  | 2.3220596E-116 | 2.7524967E-179 |
| P42346 | Mtor     | Serine/threonine-protein kinase mTOR            | 86.655   | 2.28  | 288794 | 4  | 2 | 0.79122841 | 0.208456 | 1              | 0.96048335     |
| P46462 | Vcp      | Transitional endoplasmic reticulum ATPase       | 1627.367 | 63.28 | 89349  | 43 | 2 | 0.906469   | 0.072513 | 3.6293945E-33  | 4.0160666E-63  |
| P49300 | Clec10a  | C-type lectin domain family 10 member A         | 363.302  | 46.05 | 34596  | 10 | 2 | 0.86066962 | 0.062191 | 2.2424717E-44  | 6.4329304E-78  |
| P50518 | Atp6v1e1 | V-type proton ATPase subunit E 1                | 214.308  | 36.73 | 26157  | 7  | 2 | 0.62141552 | 0.037231 | 6.5754376E-98  | 1.973636E-152  |
| P51660 | Hsd17b4  | Peroxisomal multifunctional enzyme type 2       | 224.389  | 12.11 | 79482  | 6  | 2 | 1.32952612 | 0.095694 | 1.1757327E-10  | 4.1171246E-32  |
| P51863 | Atp6v0d1 | V-type proton ATPase subunit d 1                | 379.805  | 36.75 | 40301  | 11 | 2 | 1.05751005 | 0.092341 | 2.9095214E-13  | 5.4546895E-36  |
| P52480 | Pkm      | Pyruvate kinase PKM                             | 3430.515 | 82.86 | 57845  | 65 | 2 | 0.93706156 | 0.06328  | 8.9293114E-43  | 8.6092819E-76  |
| P56399 | Usp5     | Ubiquitin carboxyl-terminal hydrolase 5         | 937.149  | 46.39 | 95833  | 25 | 2 | 0.88043176 | 0.046786 | 1.1327569E-68  | 6.5695095E-111 |
| P56480 | Atp5f1b  | ATP synthase subunit beta, mitochondrial        | 1842.881 | 74.86 | 56300  | 37 | 2 | 1.10401651 | 0.087495 | 9.216109E-17   | 5.6979792E-41  |
| P57780 | Actn4    | Alpha-actinin-4                                 | 2225.24  | 66.01 | 104977 | 51 | 2 | 0.90060905 | 0.064741 | 3.3462001E-41  | 1.0426725E-73  |
| P58021 | Tm9sf2   | Transmembrane 9 superfamily member 2            | 163.342  | 11.18 | 75330  | 5  | 2 | 1.16830776 | 0.07036  | 4.7399345E-36  | 6.5530337E-67  |
| P58242 | Smpdl3b  | Acid sphingomyelinase-like phosphodiesterase 3b | 120.72   | 14.69 | 51600  | 4  | 2 | 0.78076173 | 0.146939 | 1              | 3.5547603E-07  |
| P61021 | Rab5b    | Ras-related protein Rab-5B                      | 133.178  | 21.4  | 23707  | 4  | 2 | 1.0698975  | 0.059777 | 2.5390744E-47  | 7.7378331E-82  |
| P61078 | Ube2d3   | Ubiquitin-conjugating enzyme E2 D3              | 106.186  | 40.82 | 16687  | 4  | 2 | 0.80895027 | 0.090385 | 1.4144161E-14  | 6.9777465E-38  |
| P61589 | Rhoa     | Transforming protein RhoA                       | 508.556  | 64.77 | 21782  | 11 | 2 | 0.79270649 | 0.033895 | 2.0919094E-114 | 2.0670387E-176 |
| P61924 | Copz1    | Coatomer subunit zeta-1                         | 149.625  | 21.47 | 20198  | 3  | 2 | 0.76061284 | 0.11809  | 0.017341406    | 1.1764219E-17  |

|        |          |                                                      |          |       |       |    |   |            |          |                |                |
|--------|----------|------------------------------------------------------|----------|-------|-------|----|---|------------|----------|----------------|----------------|
| P62305 | Snrpe    | Small nuclear ribonucleoprotein E                    | 145.962  | 39.13 | 10804 | 3  | 2 | 0.75332173 | 0.053425 | 8.1433112E-54  | 1.3700268E-90  |
| P62307 | Snrpf    | Small nuclear ribonucleoprotein F                    | 87.878   | 33.72 | 9725  | 2  | 2 | 0.5365205  | 0.147285 | 1              | 1.6383435E-06  |
| P62329 | Tmsb4x   | Thymosin beta-4                                      | 113.415  | 79.55 | 5053  | 5  | 2 | 0.67167925 | 0.11002  | 0.00010575655  | 2.6902806E-22  |
| P62331 | Arf6     | ADP-ribosylation factor 6                            | 304.954  | 65.71 | 20082 | 7  | 2 | 0.86317027 | 0.029465 | 6.4068323E-130 | 1.3440194E-199 |
| P62482 | Kcnab2   | Voltage-gated potassium channel subunit beta-2       | 87.277   | 15.8  | 41021 | 4  | 2 | 0.85491305 | 0.091781 | 1.2440624E-13  | 1.5926019E-36  |
| P62804 | Hist1h4b | Histone H4                                           | 791.118  | 58.25 | 11367 | 16 | 2 | 1.11630314 | 0.061315 | 5.0506607E-45  | 8.8701775E-79  |
| P62849 | Rps24    | 40S ribosomal protein S24                            | 122.541  | 20.3  | 15423 | 3  | 2 | 1.32480292 | 0.059966 | 5.4472227E-47  | 2.1417385E-81  |
| P62959 | Hint1    | Histidine triad nucleotide-binding protein 1         | 96.715   | 58.73 | 13777 | 5  | 2 | 0.80781883 | 0.037174 | 2.7983609E-99  | 2.081069E-154  |
| P63036 | Dnaja1   | DnaJ homolog subfamily A member 1                    | 114.421  | 14.36 | 44868 | 3  | 2 | 1.44678892 | 0.039645 | 7.4472755E-90  | 7.6261736E-141 |
| P63323 | Rps12    | 40S ribosomal protein S12                            | 225.662  | 45.45 | 14525 | 6  | 2 | 0.87063972 | 0.044023 | 4.9437267E-73  | 5.4525947E-117 |
| P68033 | Actc1    | Actin, alpha cardiac muscle 1                        | 1232.137 | 40.58 | 42019 | 30 | 2 | 1.06671008 | 0.085321 | 1.9145929E-18  | 2.6216228E-43  |
| P68181 | Prkacb   | cAMP-dependent protein kinase catalytic subunit beta | 264.71   | 23.65 | 40708 | 8  | 2 | 1.08359375 | 0.036444 | 2.2406741E-104 | 9.182561E-162  |
| P70195 | Psmb7    | Proteasome subunit beta type-7                       | 53.644   | 29.96 | 29891 | 3  | 2 | 0.68504037 | 0.076598 | 1.1005108E-24  | 7.3677029E-52  |
| P70296 | Pebp1    | Phosphatidylethanolamine-binding protein 1           | 253.167  | 62.03 | 20830 | 6  | 2 | 0.82429493 | 0.087462 | 5.7342593E-17  | 2.9358681E-41  |
| P70333 | Hnrnph2  | Heterogeneous nuclear ribonucleoprotein H2           | 330.103  | 25.17 | 49280 | 8  | 2 | 0.90987908 | 0.092569 | 4.4303E-13     | 1.0049399E-35  |
| P80315 | Cct4     | T-complex protein 1 subunit delta                    | 953.883  | 60.48 | 58066 | 27 | 2 | 1.0939328  | 0.076598 | 6.2246662E-25  | 3.4029384E-52  |
| P81117 | Nucb2    | Nucleobindin-2                                       | 156.708  | 12.38 | 50304 | 4  | 2 | 1.34450548 | 0.092764 | 7.7529233E-12  | 6.7717256E-34  |
| P83868 | Ptges3   | Prostaglandin E synthase 3                           | 136.366  | 26.25 | 18721 | 3  | 2 | 0.78520099 | 0.165359 | 1              | 0.018045591    |
| P98078 | Dab2     | Disabled homolog 2                                   | 586.553  | 34.6  | 82312 | 19 | 2 | 0.94979695 | 0.123806 | 0.058303623    | 2.5830734E-16  |
| Q05921 | Rnase1   | 2-5A-dependent ribonuclease                          | 45.813   | 4.63  | 83275 | 2  | 2 | 0.68372141 | 0.04817  | 5.8588766E-66  | 3.6984078E-107 |

|        |         |                                                                    |         |       |        |    |   |            |          |               |                |
|--------|---------|--------------------------------------------------------------------|---------|-------|--------|----|---|------------|----------|---------------|----------------|
| Q07984 | Ssr4    | Translocon-associated protein subunit delta                        | 153.742 | 30.64 | 18980  | 4  | 2 | 1.24763676 | 0.07505  | 2.9703175E-28 | 1.1818335E-56  |
| Q2PQA9 | Kif5b   | Kinesin-1 heavy chain                                              | 506.963 | 21.39 | 109531 | 16 | 2 | 0.89517316 | 0.152364 | 1             | 1.8166859E-05  |
| Q3THG9 | Aarsd1  | Alanyl-tRNA editing protein Aarsd1                                 | 47.018  | 6.55  | 44971  | 2  | 2 | 1.20956357 | 0.118235 | 0.020404482   | 1.7476749E-17  |
| Q3TL44 | Nlr1    | NLR family member X1                                               | 96.774  | 7.18  | 107831 | 4  | 2 | 0.84141849 | 0.192235 | 1             | 0.60045065     |
| Q3TLH4 | Prrc2c  | Protein PRRC2C                                                     | 39.129  | 0.91  | 310892 | 2  | 2 | 0.78473813 | 0.189019 | 1             | 0.47052648     |
| Q4VSI4 | Usp7    | Ubiquitin carboxyl-terminal hydrolase 7                            | 111.74  | 7.62  | 128431 | 5  | 2 | 0.83259159 | 0.067378 | 7.8188716E-38 | 2.9548286E-69  |
| Q5M7W1 | Txnip   | Thioredoxin-interacting protein                                    | 103.107 | 7.11  | 44018  | 3  | 2 | 0.63245578 | 0.065265 | 1.4016107E-40 | 6.9246368E-73  |
| Q5PPJ9 | Sh3glb2 | Endophilin-B2                                                      | 17.669  | 5.69  | 44853  | 2  | 2 | 0.82383189 | 0.048897 | 8.2453004E-65 | 1.4082176E-105 |
| Q5RJQ8 | Calhm2  | Calcium homeostasis modulator protein 2                            | 80.793  | 9.6   | 35931  | 3  | 2 | 0.58292436 | 0.062232 | 2.0603214E-43 | 1.223984E-76   |
| Q5XI31 | Pigs    | GPI transamidase component PIG-S                                   | 251.113 | 17.84 | 61724  | 6  | 2 | 1.14419964 | 0.075848 | 1.8043702E-27 | 1.3120875E-55  |
| Q5XIG8 | Strap   | Serine-threonine kinase receptor-associated protein                | 433.385 | 52.86 | 38456  | 12 | 2 | 1.09582414 | 0.053547 | 1.8271251E-53 | 4.1219577E-90  |
| Q60631 | Grb2    | Growth factor receptor-bound protein 2                             | 219.982 | 46.54 | 25238  | 8  | 2 | 1.06697543 | 0.096385 | 2.4898353E-10 | 1.2903167E-31  |
| Q61029 | Tmpo    | Lamina-associated polypeptide 2, isoforms beta/delta/epsilon/gamma | 868.001 | 53.98 | 50373  | 17 | 2 | 0.90564175 | 0.038313 | 4.6182866E-92 | 5.3218676E-144 |
| Q61164 | Ctcf    | Transcriptional repressor CTCF                                     | 76.872  | 4.76  | 83745  | 3  | 2 | 0.83445233 | 0.076598 | 3.511455E-25  | 1.5689124E-52  |
| Q61390 | Cct6b   | T-complex protein 1 subunit zeta-2                                 | 159.704 | 11.11 | 58185  | 5  | 2 | 1.13789346 | 0.064561 | 1.6290028E-41 | 4.0249258E-74  |
| Q61599 | Arhgdib | Rho GDP-dissociation inhibitor 2                                   | 626.533 | 76.5  | 22851  | 15 | 2 | 0.79328312 | 0.042823 | 2.8200199E-76 | 1.4629318E-121 |
| Q61820 | Rasl2-9 | GTP-binding nuclear protein Ran, testis-specific isoform           | 154.659 | 25    | 24452  | 6  | 2 | 0.93928663 | 0.138271 | 1             | 1.1784911E-09  |
| Q62159 | Rhoc    | Rho-related GTP-binding protein RhoC                               | 544.859 | 65.8  | 22006  | 11 | 2 | 0.80086951 | 0.040441 | 3.1880011E-84 | 8.1666616E-133 |
| Q64105 | Spr     | Sepiapterin reductase                                              | 408.648 | 41.76 | 27883  | 8  | 2 | 0.8595088  | 0.052133 | 4.1740932E-58 | 1.9842493E-96  |



|        |          |                                                          |         |       |        |    |   |            |          |                |                |
|--------|----------|----------------------------------------------------------|---------|-------|--------|----|---|------------|----------|----------------|----------------|
| Q64378 | Fkbp5    | Peptidyl-prolyl cis-trans isomerase FKBP5                | 145.766 | 17.11 | 50966  | 6  | 2 | 1.18442696 | 0.030558 | 2.5537809E-124 | 3.860205E-191  |
| Q6AYK3 | Isyna1   | Inositol-3-phosphate synthase 1                          | 209.782 | 17.59 | 60884  | 7  | 2 | 0.8897299  | 0.139945 | 1              | 4.4768134E-09  |
| Q6P7S1 | Asah1    | Acid ceramidase                                          | 149.889 | 12.44 | 44443  | 5  | 2 | 0.83315493 | 0.089604 | 2.3597082E-15  | 5.4628121E-39  |
| Q6PB66 | Lrp6     | Leucine-rich PPR motif-containing protein, mitochondrial | 863.426 | 30.24 | 156615 | 29 | 2 | 1.18442336 | 0.022823 | 2.9819556E-166 | 2.6470113E-256 |
| Q6PB93 | Galnt2   | Polypeptide N-acetylgalactosaminyltransferase 2          | 49.663  | 5.79  | 64514  | 3  | 2 | 1.39771173 | 0.110141 | 0.00021653683  | 1.0513923E-21  |
| Q6PCN7 | Hltf     | Helicase-like transcription factor                       | 55.908  | 2.69  | 113317 | 2  | 2 | 0.62094951 | 0.123607 | 0.050660747    | 1.7762081E-16  |
| Q6PFQ7 | Rasa4    | Ras GTPase-activating protein 4                          | 83.052  | 3.87  | 90060  | 3  | 2 | 1.20409818 | 0.097788 | 7.5041231E-10  | 7.003024E-31   |
| Q6ZPF4 | Fmn13    | Formin-like protein 3                                    | 410.717 | 14.4  | 117169 | 10 | 2 | 0.85941368 | 0.041279 | 2.0421558E-80  | 2.0758825E-127 |
| Q6ZQA0 | Nbeal2   | Neurobeachin-like protein 2                              | 119.261 | 1.5   | 301924 | 3  | 2 | 0.63781525 | 0.147285 | 1              | 2.0244086E-06  |
| Q78IK4 | Apool    | MICOS complex subunit Mic27                              | 230.272 | 26.42 | 29261  | 5  | 2 | 0.91885593 | 0.074914 | 7.5045031E-30  | 9.0018381E-59  |
| Q792H5 | Celf2    | CUGBP Elav-like family member 2                          | 155.568 | 10.24 | 54271  | 5  | 2 | 0.72013152 | 0.136169 | 1              | 1.2050884E-11  |
| Q7M6Y3 | Picalm   | Phosphatidylinositol-binding clathrin assembly protein   | 553.799 | 26.52 | 71543  | 12 | 2 | 0.86662717 | 0.066497 | 3.9107755E-38  | 1.1797312E-69  |
| Q80UM7 | Mogs     | Mannosyl-oligosaccharide glucosidase                     | 495.036 | 21.82 | 91831  | 11 | 2 | 1.15682727 | 0.07613  | 1.9756461E-25  | 7.2024719E-53  |
| Q80XQ2 | Tbc1d5   | TBC1 domain family member 5                              | 48.421  | 3.07  | 91837  | 2  | 2 | 0.84196856 | 0.034493 | 5.0966938E-111 | 1.9412948E-171 |
| Q810A7 | Ddx42    | ATP-dependent RNA helicase DDX42                         | 69.43   | 3.55  | 101965 | 2  | 2 | 0.59999449 | 0.092764 | 1.5372021E-12  | 6.1849248E-35  |
| Q8BFR4 | Gns      | N-acetylglucosamine-6-sulfatase                          | 106.863 | 16.36 | 61175  | 7  | 2 | 0.68880793 | 0.079773 | 4.8686571E-22  | 2.9793769E-48  |
| Q8BMG7 | Rab3gap2 | Rab3 GTPase-activating protein non-catalytic subunit     | 136.472 | 7.69  | 152535 | 8  | 2 | 1.09729127 | 0.089671 | 3.7079931E-15  | 1.0367139E-38  |
| Q8BMJ2 | Lars     | Leucine--tRNA ligase, cytoplasmic                        | 855.886 | 30.14 | 134192 | 26 | 2 | 1.11006931 | 0.063945 | 3.8325151E-42  | 5.9270325E-75  |

|        |          |                                                                   |          |       |        |    |   |            |          |                |                |
|--------|----------|-------------------------------------------------------------------|----------|-------|--------|----|---|------------|----------|----------------|----------------|
| Q8BRN9 | Cc2d1b   | Coiled-coil and C2 domain-containing protein 1B                   | 135.932  | 6.96  | 93091  | 4  | 2 | 0.70361393 | 0.110118 | 0.00013471571  | 4.2462474E-22  |
| Q8BT60 | Cpne3    | Copine-3                                                          | 129.342  | 10.32 | 59585  | 4  | 2 | 1.08698153 | 0.100256 | 2.2018264E-09  | 3.6676415E-30  |
| Q8BXQ2 | Pigt     | GPI transamidase component PIG-T                                  | 62.931   | 7.73  | 65705  | 3  | 2 | 1.40501471 | 0.099964 | 1.5425983E-09  | 2.1197883E-30  |
| Q8BYW1 | Arhgap25 | Rho GTPase-activating protein 25                                  | 346.993  | 21.91 | 73383  | 10 | 2 | 0.84144811 | 0.034907 | 1.2584752E-108 | 6.1111531E-168 |
| Q8C0L6 | Paox     | Peroxisomal N(1)-acetyl-spermine/spermidine oxidase               | 163.299  | 11.31 | 55447  | 5  | 2 | 0.73234132 | 0.137931 | 1              | 2.2370707E-10  |
| Q8C2E7 | Washc5   | WASH complex subunit 5                                            | 200.055  | 8.54  | 134110 | 7  | 2 | 0.79727184 | 0.074876 | 1.7280313E-31  | 6.3472524E-61  |
| Q8C3J5 | Dock2    | Dedicator of cytokinesis protein 2                                | 1416.391 | 27.79 | 211704 | 40 | 2 | 0.91260321 | 0.079773 | 8.335705E-22   | 6.2159761E-48  |
| Q8CB77 | Eloa     | Elongin-A                                                         | 63.24    | 5.43  | 87161  | 2  | 2 | 0.76883239 | 0.084156 | 1.553897E-19   | 8.2544104E-45  |
| Q8CIH5 | Plcg2    | 1-phosphatidylinositol 4,5-bisphosphate phosphodiesterase gamma-2 | 681.111  | 21.5  | 147592 | 18 | 2 | 0.91856938 | 0.118444 | 0.027981648    | 3.8338037E-17  |
| Q8K482 | Emilin2  | EMILIN-2                                                          | 48.044   | 3.72  | 117310 | 2  | 2 | 0.80207893 | 0.062191 | 9.8608747E-44  | 4.5939435E-77  |
| Q8R050 | Gspt1    | Eukaryotic peptide chain release factor GTP-binding subunit ERF3A | 258.743  | 20.75 | 68625  | 9  | 2 | 0.83593929 | 0.108133 | 3.8922651E-05  | 4.222301E-23   |
| Q8VDQ8 | Sirt2    | NAD-dependent protein deacetylase sirtuin-2                       | 92.204   | 9.51  | 43256  | 2  | 2 | 0.85678487 | 0.121235 | 0.032612376    | 5.6610485E-17  |
| Q8VE99 | Ccdc115  | Coiled-coil domain-containing protein 115                         | 70.489   | 22.78 | 19743  | 2  | 2 | 0.7700426  | 0.04313  | 7.7415587E-74  | 3.9888646E-118 |
| Q8VHR5 | Gatad2b  | Transcriptional repressor p66-beta                                | 34.843   | 5.89  | 65411  | 2  | 2 | 0.72940316 | 0.059338 | 1.1807009E-47  | 2.782128E-82   |
| Q91VW3 | Sh3bgrl3 | SH3 domain-binding glutamic acid-rich-like protein 3              | 104.967  | 55.91 | 10477  | 4  | 2 | 0.73807937 | 0.099964 | 1.0775178E-09  | 1.2228496E-30  |
| Q91W89 | Man2c1   | Alpha-mannosidase 2C1                                             | 128.331  | 5.29  | 115688 | 4  | 2 | 0.88010849 | 0.090385 | 2.1974319E-14  | 1.3102678E-37  |
| Q920A5 | Scpep1   | Retinoid-inducible serine carboxypeptidase                        | 437.629  | 27.43 | 50965  | 14 | 2 | 0.74162049 | 0.02849  | 1.1315663E-136 | 7.2187505E-210 |
| Q922Q8 | Lrrc59   | Leucine-rich repeat-containing protein 59                         | 337.106  | 39.74 | 34877  | 9  | 2 | 1.16991326 | 0.034931 | 3.7643659E-108 | 3.0258852E-167 |

|        |        |                                                                    |          |       |        |    |   |            |          |                |                |
|--------|--------|--------------------------------------------------------------------|----------|-------|--------|----|---|------------|----------|----------------|----------------|
| Q922U1 | Prpf3  | U4/U6 small nuclear ribonucleoprotein Prp3                         | 89.173   | 12.3  | 77455  | 5  | 2 | 0.81992845 | 0.075971 | 3.4633657E-26  | 6.8724141E-54  |
| Q99K23 | Ufsp2  | Ufm1-specific protease 2                                           | 49.549   | 6.29  | 52515  | 3  | 2 | 1.22234498 | 0.174751 | 1              | 0.13218977     |
| Q99KP6 | Prpf19 | Pre-mRNA-processing factor 19                                      | 539.892  | 46.23 | 55239  | 14 | 2 | 0.89472935 | 0.048708 | 3.4228386E-65  | 4.204158E-106  |
| Q99NB9 | Sf3b1  | Splicing factor 3B subunit 1                                       | 1219.249 | 29.6  | 145816 | 30 | 2 | 0.92605133 | 0.048496 | 1.4177142E-65  | 1.2500461E-106 |
| Q9CPQ3 | Tomm22 | Mitochondrial import receptor subunit TOM22 homolog                | 166.177  | 30.99 | 15537  | 3  | 2 | 0.84959129 | 0.106549 | 7.911033E-06   | 2.4269756E-24  |
| Q9CPU4 | Mgst3  | Microsomal glutathione S-transferase 3                             | 204.663  | 49.67 | 16958  | 4  | 2 | 0.82892828 | 0.046721 | 1.8623872E-69  | 5.3952927E-112 |
| Q9CYG7 | Tomm34 | Mitochondrial import receptor subunit TOM34                        | 221.466  | 24.27 | 34278  | 5  | 2 | 0.83073798 | 0.074914 | 2.1570391E-30  | 1.7409822E-59  |
| Q9CZN7 | Shmt2  | Serine hydroxymethyltransferase, mitochondrial                     | 867.461  | 60.52 | 55759  | 23 | 2 | 1.14247857 | 0.031688 | 2.6172856E-121 | 1.2630835E-186 |
| Q9D662 | Sec23b | Protein transport protein Sec23B                                   | 641.768  | 33.25 | 86437  | 15 | 2 | 0.84238765 | 0.08503  | 7.0697795E-19  | 6.6301025E-44  |
| Q9D7N9 | Apmap  | Adipocyte plasma membrane-associated protein                       | 144.322  | 16.39 | 46434  | 4  | 2 | 1.31112896 | 0.190704 | 1              | 0.56842729     |
| Q9D880 | Timm50 | Mitochondrial import inner membrane translocase subunit TIM50      | 274.972  | 18.41 | 39776  | 5  | 2 | 0.93811362 | 0.089002 | 5.9791677E-16  | 7.864149E-40   |
| Q9DAS9 | Gng12  | Guanine nucleotide-binding protein G(I)/G(S)/G(O) subunit gamma-12 | 95.198   | 37.5  | 7997   | 2  | 2 | 0.84425691 | 0.118235 | 0.023932505    | 2.5907287E-17  |
| Q9DBG5 | Plin3  | Perilipin-3                                                        | 782.967  | 66.82 | 47262  | 19 | 2 | 0.70341271 | 0.092764 | 5.1961352E-12  | 3.7342867E-34  |
| Q9DCD0 | Pgd    | 6-phosphogluconate dehydrogenase, decarboxylating                  | 927.981  | 65.63 | 53247  | 26 | 2 | 0.91605362 | 0.074914 | 1.151997E-30   | 7.6328387E-60  |
| Q9JIK9 | Mrps34 | 28S ribosomal protein S34, mitochondrial                           | 30.133   | 10.55 | 25827  | 3  | 2 | 1.1374721  | 0.057716 | 5.1939012E-50  | 1.9428047E-85  |
| Q9QWT9 | Kifc1  | Kinesin-like protein KIFC1                                         | 85.723   | 8.46  | 74153  | 4  | 2 | 0.79207809 | 0.12864  | 0.20017377     | 9.5272872E-15  |

|        |        |                                                 |         |       |       |    |   |            |          |               |                |
|--------|--------|-------------------------------------------------|---------|-------|-------|----|---|------------|----------|---------------|----------------|
| Q9QYR9 | Acot2  | Acyl-coenzyme A thioesterase 2, mitochondrial   | 162.512 | 13.25 | 49657 | 4  | 2 | 0.82923186 | 0.08022  | 1.4233176E-21 | 1.2945045E-47  |
| Q9R1P3 | Psmb2  | Proteasome subunit beta type-2                  | 225.423 | 55.22 | 22906 | 7  | 2 | 0.83269293 | 0.053031 | 7.1093446E-55 | 4.9333942E-92  |
| Q9WUM4 | Coro1c | Coronin-1C                                      | 654.857 | 39.87 | 53121 | 16 | 2 | 0.89271048 | 0.052632 | 2.2163597E-57 | 1.9289042E-95  |
| Q9WVA3 | Bub3   | Mitotic checkpoint protein BUB3                 | 206.598 | 23.62 | 36955 | 6  | 2 | 0.92114478 | 0.115695 | 0.0050806949  | 6.8741582E-19  |
| Q9WVJ2 | Psmd13 | 26S proteasome non-ATPase regulatory subunit 13 | 718.896 | 59.31 | 42809 | 18 | 2 | 1.13494173 | 0.051189 | 8.6187346E-62 | 1.9157601E-101 |
| Q9Z0S1 | Bpnt1  | 3'(2'),5'-bisphosphate nucleotidase 1           | 96.983  | 13.64 | 33196 | 3  | 2 | 0.83278039 | 0.090385 | 3.4041842E-14 | 2.4558208E-37  |
| Q9Z2W0 | Dnpep  | Aspartyl aminopeptidase                         | 583.343 | 48.2  | 52207 | 13 | 2 | 0.87595055 | 0.078053 | 1.0470452E-23 | 1.5751407E-50  |
