# Supplementary material for: Repeated Exposure of Macrophages to Synthetic Amorphous Silica Induces Adaptive Proteome Changes and a Moderate Cell Activation
Source: MDPI journal article supplement (doi:10.3390/nano12091424), 2022-04-22
Supplement: s1 [file s1]

Table S5: results of the pathway analysis by the DAVID tool using proteins modulated by fumed silica  
cutoff value for cluster selection: FDR≤0.1

| <b>Annotation Cluster 1</b> |                                                            | Enrichment Score: 4.729766471127018 |                      |                                                                                                                                                                                |                  |                      |
|-----------------------------|------------------------------------------------------------|-------------------------------------|----------------------|--------------------------------------------------------------------------------------------------------------------------------------------------------------------------------|------------------|----------------------|
| Category                    | Term                                                       | Count                               | PValue               | Genes                                                                                                                                                                          | Fold Enrichment  | FDR                  |
| GOTERM_MF_DIRECT            | GO:0098641~cadherin binding involved in cell-cell adhesion | 16                                  | 4.65662105374771E-06 | Q8BK64, Q9JKF1, P59325, P35700, Q9DCL9, Q6A028, Q61191, P09055, P06151, P60335, Q5FWK3, O54988, P05064, P17182, P47911, P26039                                                 | 4.33111452466291 | 0.001145528779222    |
| GOTERM_CC_DIRECT            | GO:0005913~cell-cell adherens junction                     | 16                                  | 7.68227002605324E-06 | Q8BK64, Q9JKF1, P59325, P35700, Q9DCL9, Q6A028, Q61191, P09055, P06151, P60335, Q5FWK3, O54988, P05064, P17182, P47911, P26039                                                 | 4.16545733806472 | 0.000187118148492    |
| GOTERM_BP_DIRECT            | GO:0098609~cell-cell adhesion                              | 11                                  | 0.000180775728776    | Q8BK64, Q61191, P06151, Q5FWK3, O54988, P05064, P17182, P59325, P35700, P26039, Q9DCL9                                                                                         | 4.47826184847461 | 0.052200172511695    |
| <b>Annotation Cluster 2</b> |                                                            | Enrichment Score: 4.34692497528786  |                      |                                                                                                                                                                                |                  |                      |
| Category                    | Term                                                       | Count                               | PValue               | Genes                                                                                                                                                                          | Fold Enrichment  | FDR                  |
| KEGG_PATHWAY                | mmu01130:Biosynthesis of antibiotics                       | 22                                  | 4.63260550456338E-10 | P06745, Q3TRM8, Q8BH95, Q8VDL4, O08528, Q9WUM5, Q9JLJ2, P54822, Q8VCN5, Q9DCL9, Q9WTP6, O35855, P14152, P16460, P06151, P05063, Q9Z0S1, P05064, P09411, P17182, Q9CZU6, Q9QXG4 | 5.3786636149787  | 9.07990678894422E-08 |
| UP_KEYWORDS                 | Glycolysis                                                 | 8                                   | 7.52692254316195E-08 | P06745, Q3TRM8, P05063, Q8VDL4, P05064, O08528, P09411, P17182                                                                                                                 | 21.3333333333333 | 2.60933314829614E-06 |
| GOTERM_BP_DIRECT            | GO:0006096~glycolytic process                              | 8                                   | 3.36980156341036E-07 | P06745, Q3TRM8, P05063, Q8VDL4, P05064, O08528, P09411, P17182                                                                                                                 | 17.0988179669031 | 0.000446835687308    |
| KEGG_PATHWAY                | mmu00010:Glycolysis / Gluconeogenesis                      | 11                                  | 3.79518606084664E-07 | P06745, Q3TRM8, P06151, P05063, Q8VDL4, P05064, O08528, P09411, P17182, Q9JLJ2, Q9QXG4                                                                                         | 8.71995464852608 | 3.7192823396297E-05  |
| KEGG_PATHWAY                | mmu01200:Carbon metabolism                                 | 13                                  | 1.76165161540288E-06 | P06745, Q3TRM8, Q8BH95, Q8VDL4, O08528, Q9WUM5, P14152, P05063, P05064, P09411, P17182, Q9CZU6, Q9QXG4                                                                         | 5.86341778090547 | 0.000115094572206    |
| GOTERM_BP_DIRECT            | GO:0005975~carbohydrate metabolic process                  | 11                                  | 0.000360575512936    | O09159, P06745, Q3TRM8, P14152, P06151, Q8VDL4, O08528, P09411, Q9CPU0, Q9CZU6, Q8BHN3                                                                                         | 4.10869655029953 | 0.053124792239309    |
| KEGG_PATHWAY                | mmu00051:Fructose and mannose metabolism                   | 5                                   | 0.003712513945938    | Q3TRM8, P05063, P05064, O08528, P21300                                                                                                                                         | 7.69407763105242 | 0.066150248491267    |

**Annotation Cluster 3** Enrichment Score: 3.40900541367469

| Category    | Term               | Count | PValue               | Genes                                                                                                                                                                                                                                                                                                                                                          | Fold Enrichment  | FDR                  |
|-------------|--------------------|-------|----------------------|----------------------------------------------------------------------------------------------------------------------------------------------------------------------------------------------------------------------------------------------------------------------------------------------------------------------------------------------------------------|------------------|----------------------|
| UP_KEYWORDS | Nucleotide-binding | 44    | 2.32385735814229E-07 | P32921, Q61699, P28740, Q61316, Q501J6, O08528, P59325, Q91YH5, Q9DCL9, Q9WTP6, Q9JM14, P63001, Q8C878, Q9QWT9, P49717, P68037, P16460, Q04899, P61028, O54988, P09411, Q8CGK3, P61205, P60710, Q9D0F6, Q62159, Q2TBE6, Q61820, Q3TRM8, P68033, Q61183, Q9WUM5, Q3THK7, P36536, Q04692, P84096, Q68FL6, O55143, P51859, P08113, Q9QXG4, P08752, P60843, P60766 | 2.34131508931965 | 6.90517614990853E-06 |

|                  |                               |    |                     |                                                                                                                                                                                                                                                                                                                                                                                        |                  |                   |
|------------------|-------------------------------|----|---------------------|----------------------------------------------------------------------------------------------------------------------------------------------------------------------------------------------------------------------------------------------------------------------------------------------------------------------------------------------------------------------------------------|------------------|-------------------|
| GOTERM_MF_DIRECT | GO:0000166~nucleotide binding | 47 | 5.1276111626207E-05 | Q9CX86, P32921, Q61699, P28740, Q61316, Q501J6, O08528, P59325, Q91YH5, Q9DCL9, Q9WTP6, Q9JM14, P63001, Q8C878, P49717, Q8VIJ6, P68037, P16460, Q04899, P61028, O54988, Q8CGK3, P61205, P60710, Q9D0F6, Q62159, Q2TBE6, Q61820, Q3TRM8, P68033, Q61183, Q9WUM5, P70333, Q3THK7, P36536, Q04692, P17225, P84096, Q68FL6, O55143, P51859, P08113, O35737, Q9QXG4, P08752, P60843, P60766 | 1.83348091302637 | 0.006306961730023 |
|------------------|-------------------------------|----|---------------------|----------------------------------------------------------------------------------------------------------------------------------------------------------------------------------------------------------------------------------------------------------------------------------------------------------------------------------------------------------------------------------------|------------------|-------------------|

|             |             |    |                   |                                                                                                                                                                                                                                                |                 |                   |
|-------------|-------------|----|-------------------|------------------------------------------------------------------------------------------------------------------------------------------------------------------------------------------------------------------------------------------------|-----------------|-------------------|
| UP_KEYWORDS | ATP-binding | 30 | 0.000313616958195 | P32921, Q61699, P28740, Q61316, Q501J6, O08528, Q9DCL9, Q9WTP6, Q8C878, Q9QWT9, P49717, P68037, P16460, Q04899, O54988, P09411, Q8CGK3, P60710, Q9D0F6, Q2TBE6, Q3TRM8, P68033, Q61183, Q3THK7, Q04692, Q68FL6, O55143, P08113, Q9QXG4, P60843 | 2.0542920029347 | 0.004077020456537 |
|-------------|-------------|----|-------------------|------------------------------------------------------------------------------------------------------------------------------------------------------------------------------------------------------------------------------------------------|-----------------|-------------------|

**Annotation Cluster 4** Enrichment Score: 2.7113522154185365

| Category         | Term                | Count | PValue            | Genes                                                                                          | Fold Enrichment  | FDR               |
|------------------|---------------------|-------|-------------------|------------------------------------------------------------------------------------------------|------------------|-------------------|
| GOTERM_CC_DIRECT | GO:0005623~cell     | 12    | 0.000123828148036 | P27773, O55143, Q3TRM8, O08807, P47791, P09103, O08528, P29391, P30681, Q8BZW8, Q8K2V6, P35700 | 4.27365103515731 | 0.002483846969423 |
| UP_KEYWORDS      | Redox-active center | 6     | 0.000141239183041 | P27773, O08807, P47791, P09103, Q9ESY9, P35700                                                 | 11.9148936170213 | 0.00225982692866  |

| <b>Annotation Cluster 5</b> |                                         | Enrichment Score: 2.5374635408989508 |                      |                                                                                                                                |                  |                      |
|-----------------------------|-----------------------------------------|--------------------------------------|----------------------|--------------------------------------------------------------------------------------------------------------------------------|------------------|----------------------|
| Category                    | Term                                    | Count                                | PValue               | Genes                                                                                                                          | Fold Enrichment  | FDR                  |
| UP_KEYWORDS                 | mRNA splicing                           | 12                                   | 5.75080583517719E-05 | Q9CSN1, P17225, Q9JKP5, Q9DAR7, Q99NB9, Q8VIJ6, Q8BTI8, Q99KP6, P83870, P62317, O35691, O35737                                 | 4.66666666666667 | 0.001087425103379    |
| UP_KEYWORDS                 | mRNA processing                         | 13                                   | 0.000122590951395    | Q9CSN1, Q99NB9, Q8BTI8, Q61183, O35691, P17225, Q9JKP5, Q9DAR7, Q8VIJ6, Q99KP6, P83870, P62317, O35737                         | 3.95222584147666 | 0.002124909824183    |
| GOTERM_CC_DIRECT            | GO:0071013~catalytic step 2 spliceosome | 8                                    | 0.000166506607858    | Q9CSN1, Q99NB9, Q8BTI8, Q99KP6, P83870, P62317, O35691, O35737                                                                 | 6.85564853556485 | 0.003154375182189    |
| UP_KEYWORDS                 | Spliceosome                             | 8                                    | 0.000264570776243    | Q9CSN1, Q99NB9, Q8BTI8, Q99KP6, P83870, P62317, O35691, O35737                                                                 | 6.38176638176638 | 0.003668714763897    |
| GOTERM_BP_DIRECT            | GO:0006397~mRNA processing              | 14                                   | 0.000304163224326    | Q9CSN1, Q99NB9, Q8BTI8, Q61183, O35691, P17225, Q9JKP5, Q9DAR7, Q8VIJ6, Q99KP6, P83870, P60335, P62317, O35737                 | 3.34542090656799 | 0.052200172511695    |
| GOTERM_BP_DIRECT            | GO:0008380~RNA splicing                 | 12                                   | 0.000314933167491    | Q9CSN1, P17225, Q9JKP5, Q9DAR7, Q99NB9, Q8VIJ6, Q8BTI8, Q99KP6, P83870, P62317, O35691, O35737                                 | 3.83127041582061 | 0.052200172511695    |
| GOTERM_CC_DIRECT            | GO:0005681~spliceosomal complex         | 8                                    | 0.001356831203338    | Q9CSN1, Q99NB9, Q8BTI8, Q99KP6, P83870, P62317, O35691, O35737                                                                 | 4.83928131922225 | 0.019278310014091    |
| <b>Annotation Cluster 6</b> |                                         | Enrichment Score: 2.5373357739990734 |                      |                                                                                                                                |                  |                      |
| Category                    | Term                                    | Count                                | PValue               | Genes                                                                                                                          | Fold Enrichment  | FDR                  |
| UP_KEYWORDS                 | Ribonucleoprotein                       | 16                                   | 1.23943400251192E-06 | Q9CX86, Q9D0G0, P19253, P70333, P62270, Q8VDM6, Q61990, P63323, P62245, Q6DFW4, P60335, P62317, P60867, O35737, P47911, P62830 | 4.84848484848485 | 2.86446969469422E-05 |
| GOTERM_BP_DIRECT            | GO:0006412~translation                  | 16                                   | 0.000241783752088    | P32921, P05555, Q9D0G0, P19253, Q9CR62, P59325, P62270, Q68FL6, P63323, P62245, Q61749, Q8QZY1, P60867, P47911, P62830, P60843 | 3.07011195415716 | 0.052200172511695    |
| GOTERM_CC_DIRECT            | GO:0005840~ribosome                     | 9                                    | 0.002115115799313    | P05555, P62245, Q9D0G0, P19253, P35564, P62270, P60867, P47911, P62830                                                         | 3.93835128638832 | 0.028850179502623    |
| UP_KEYWORDS                 | Ribosomal protein                       | 8                                    | 0.006255720337146    | P63323, P62245, Q9D0G0, P19253, P62270, P60867, P47911, P62830                                                                 | 3.67816091954023 | 0.048192215930604    |
| <b>Annotation Cluster 7</b> |                                         | Enrichment Score: 2.400163403951474  |                      |                                                                                                                                |                  |                      |
| Category                    | Term                                    | Count                                | PValue               | Genes                                                                                                                          | Fold Enrichment  | FDR                  |

|                                                                   |                                                    |       |                   |                                                                                                                        |                  |                   |
|-------------------------------------------------------------------|----------------------------------------------------|-------|-------------------|------------------------------------------------------------------------------------------------------------------------|------------------|-------------------|
| GOTERM_BP_DIRECT                                                  | GO:0006457~protein folding                         | 9     | 0.000263164484311 | P27773, Q8BK64, Q9WU28, P24369, P09103, P08113, P35564, P04441, P17742                                                 | 5.41017287234043 | 0.052200172511695 |
| GOTERM_CC_DIRECT                                                  | GO:0005790~smooth endoplasmic reticulum            | 5     | 0.000391902521897 | P27773, O08807, P24369, P08113, P35564                                                                                 | 14.18410041841   | 0.006074489089406 |
| GOTERM_CC_DIRECT                                                  | GO:0034663~endoplasmic reticulum chaperone complex | 3     | 0.008889852004786 | P24369, P09103, P08113                                                                                                 | 20.5669456066946 | 0.091861804049457 |
| <b>Annotation Cluster 8</b> Enrichment Score: 2.294322822731369   |                                                    |       |                   |                                                                                                                        |                  |                   |
| Category                                                          | Term                                               | Count | PValue            | Genes                                                                                                                  | Fold Enrichment  | FDR               |
| UP_KEYWORDS                                                       | Lyase                                              | 9     | 0.000178055014714 | Q8BH95, P05063, P05064, P17182, Q9CPU0, P54822, Q8VCN5, Q9WVQ5, Q9DCL9                                                 | 5.75342465753425 | 0.002645388790031 |
| <b>Annotation Cluster 9</b> Enrichment Score: 1.9848897071203018  |                                                    |       |                   |                                                                                                                        |                  |                   |
| Category                                                          | Term                                               | Count | PValue            | Genes                                                                                                                  | Fold Enrichment  | FDR               |
| UP_KEYWORDS                                                       | Isomerase                                          | 7     | 0.002002568759485 | P27773, P06745, Q04750, P24369, P09103, P34884, P17742                                                                 | 5.3551912568306  | 0.019834966760612 |
| <b>Annotation Cluster 10</b> Enrichment Score: 1.9641236439846836 |                                                    |       |                   |                                                                                                                        |                  |                   |
| Category                                                          | Term                                               | Count | PValue            | Genes                                                                                                                  | Fold Enrichment  | FDR               |
| UP_KEYWORDS                                                       | GTP-binding                                        | 12    | 0.000932756438286 | P84096, P63001, Q62159, Q61820, P61028, Q9WUM5, P59325, P36536, Q91YH5, P08752, P60766, P61205                         | 3.37349397590361 | 0.009700666958174 |
| UP_KEYWORDS                                                       | Prenylation                                        | 7     | 0.006852619317892 | P84096, P63001, Q62159, P63213, P61028, P14733, P60766                                                                 | 4.16135881104034 | 0.050905172075767 |
| <b>Annotation Cluster 11</b> Enrichment Score: 1.903782710156112  |                                                    |       |                   |                                                                                                                        |                  |                   |
| Category                                                          | Term                                               | Count | PValue            | Genes                                                                                                                  | Fold Enrichment  | FDR               |
| UP_KEYWORDS                                                       | Oxidoreductase                                     | 15    | 0.009007246765578 | P09528, P08228, Q8BSY0, Q91YR9, O08807, P47791, Q9ESY9, Q8BVI4, Q99KP3, Q9JLJ2, P35700, P14152, P06151, Q9JI75, P21300 | 2.19092331768388 | 0.058547103976259 |
| <b>Annotation Cluster 12</b> Enrichment Score: 1.6829498804963494 |                                                    |       |                   |                                                                                                                        |                  |                   |
| Category                                                          | Term                                               | Count | PValue            | Genes                                                                                                                  | Fold Enrichment  | FDR               |
| KEGG_PATHWAY                                                      | mmu05100:Bacterial invasion of epithelial cells    | 8     | 0.00065931075651  | Q8BUR4, P84096, P63001, P09055, Q68FD5, Q8BPU7, P60766, P60710                                                         | 5.36612593755451 | 0.016153113534495 |
| <b>Annotation Cluster 13</b> Enrichment Score: 1.6151610292545608 |                                                    |       |                   |                                                                                                                        |                  |                   |
| Category                                                          | Term                                               | Count | PValue            | Genes                                                                                                                  | Fold Enrichment  | FDR               |

|                                                                   |                                                                                 |       |                   |                                                                                                                                |                  |                   |
|-------------------------------------------------------------------|---------------------------------------------------------------------------------|-------|-------------------|--------------------------------------------------------------------------------------------------------------------------------|------------------|-------------------|
| UP_KEYWORDS                                                       | RNA-binding                                                                     | 16    | 0.002098302718874 | Q80SW1, Q9CX86, Q501J6, Q61183, P70333, P62270, Q8VDM6, Q61990, P17225, Q9JKP5, Q68FL6, Q8VIJ6, P60335, O35737, A2RSY6, P60843 | 2.48474764281753 | 0.019838498432995 |
| <b>Annotation Cluster 14</b> Enrichment Score: 1.5187892501433913 |                                                                                 |       |                   |                                                                                                                                |                  |                   |
| Category                                                          | Term                                                                            | Count | PValue            | Genes                                                                                                                          | Fold Enrichment  | FDR               |
| UP_KEYWORDS                                                       | Purine biosynthesis                                                             | 3     | 0.008184301375907 | Q3THK7, P54822, Q9DCL9                                                                                                         | 21.5384615384615 | 0.056744489539622 |
| <b>Annotation Cluster 15</b> Enrichment Score: 1.4432081195169078 |                                                                                 |       |                   |                                                                                                                                |                  |                   |
| Category                                                          | Term                                                                            | Count | PValue            | Genes                                                                                                                          | Fold Enrichment  | FDR               |
| UP_KEYWORDS                                                       | Protein biosynthesis                                                            | 7     | 0.005029622450828 | P32921, Q68FL6, P10711, Q61749, Q8QZY1, P59325, P60843                                                                         | 4.44444444444444 | 0.040236979606625 |
| <b>Annotation Cluster 16</b> Enrichment Score: 1.4185799608286274 |                                                                                 |       |                   |                                                                                                                                |                  |                   |
| Category                                                          | Term                                                                            | Count | PValue            | Genes                                                                                                                          | Fold Enrichment  | FDR               |
| GOTERM_CC_DIRECT                                                  | GO:0036464~cytoplasmic ribonucleoprotein granule                                | 5     | 0.000341066169004 | P63001, Q9JKF1, P47911, P60766, P60710                                                                                         | 14.6906754333533 | 0.005538264934785 |
| KEGG_PATHWAY                                                      | mmu04670:Leukocyte transendothelial migration                                   | 8     | 0.007024367631151 | P05555, P63001, P09055, O70145, P11835, P08752, P60766, P60710                                                                 | 3.54710019601061 | 0.093891157632156 |
| KEGG_PATHWAY                                                      | mmu04810:Regulation of actin cytoskeleton                                       | 11    | 0.007185547777971 | Q8BUR4, P05555, P63001, Q3UQ44, P13020, P09055, P11835, Q9JKF1, Q61210, P60766, P60710                                         | 2.70195777841653 | 0.093891157632156 |
| <b>Annotation Cluster 17</b> Enrichment Score: 1.4097499508569125 |                                                                                 |       |                   |                                                                                                                                |                  |                   |
| Category                                                          | Term                                                                            | Count | PValue            | Genes                                                                                                                          | Fold Enrichment  | FDR               |
| UP_KEYWORDS                                                       | DNA replication                                                                 | 5     | 0.018912063937907 | Q60973, P49717, Q62193, Q99MD9, Q9D0F6                                                                                         | 4.91228070175439 | 0.103909960698105 |
| <b>Annotation Cluster 18</b> Enrichment Score: 1.292265533056753  |                                                                                 |       |                   |                                                                                                                                |                  |                   |
| Category                                                          | Term                                                                            | Count | PValue            | Genes                                                                                                                          | Fold Enrichment  | FDR               |
| KEGG_PATHWAY                                                      | mmu04612:Antigen processing and presentation                                    | 9     | 0.000151506589805 | P27773, P06339, Q61316, P01902, P01901, P01900, P01899, Q9R233, Q9ESY9, P35564, P04441                                         | 5.74240915878547 | 0.004949215266978 |
| GOTERM_CC_DIRECT                                                  | GO:0030670~phagocytic vesicle membrane                                          | 6     | 0.000252507931086 | P06339, P17047, P01902, P01901, P01900, P61028, P01899, Q9R233                                                                 | 10.5022700970355 | 0.00430526022501  |
| GOTERM_CC_DIRECT                                                  | GO:0071556~integral component of lumenal side of endoplasmic reticulum membrane | 4     | 0.00071555813496  | P06339, P01902, P01901, P01900, P01899, P35564                                                                                 | 21.9380753138075 | 0.010608927131367 |
| UP_KEYWORDS                                                       | MHC I                                                                           | 3     | 0.008184301375907 | P06339, P01902, P01901, P01900, P01899                                                                                         | 21.5384615384615 | 0.056744489539622 |

**Annotation Cluster 19** Enrichment Score: 1.270307085208816

| Category    | Term          | Count | PValue            | Genes                                                                                                                                                          | Fold Enrichment | FDR               |
|-------------|---------------|-------|-------------------|----------------------------------------------------------------------------------------------------------------------------------------------------------------|-----------------|-------------------|
| UP_KEYWORDS | Mitochondrion | 20    | 0.018964113955634 | Q8K411, Q2TBE6, Q9R0X4, P56135, Q8BH95, Q9D0G0, P47791, Q8BH86, Q9CR62, Q8WTY4, Q9WUM5, P19783, Q9WTP6, O35855, P32020, Q9EPB4, Q9DCX2, Q9CZU6, Q9JK81, Q8CGK3 | 1.7643352236925 | 0.103909960698105 |

**Annotation Cluster 20** Enrichment Score: 1.2182827387595705

| Category     | Term               | Count | PValue               | Genes                                                                                                                  | Fold Enrichment  | FDR               |
|--------------|--------------------|-------|----------------------|------------------------------------------------------------------------------------------------------------------------|------------------|-------------------|
| KEGG_PATHWAY | mmu04145:Phagosome | 13    | 9.21276543953499E-05 | P05555, P06339, O70145, P08508, P11835, P35564, P63001, P17047, P09055, P01902, P01901, P01900, P01899, O70439, P60710 | 3.97752317301189 | 0.004514255065372 |

**Annotation Cluster 21** Enrichment Score: 1.1657249375558902

| Category     | Term                         | Count | PValue           | Genes                                  | Fold Enrichment  | FDR               |
|--------------|------------------------------|-------|------------------|----------------------------------------|------------------|-------------------|
| KEGG_PATHWAY | mmu00620:Pyruvate metabolism | 5     | 0.00612016870271 | P14152, P06151, Q9CPU0, Q9JLJ2, Q9QXG4 | 6.70765742194314 | 0.093891157632156 |

**Annotation Cluster 32** Enrichment Score: 0.8933160367706657

| Category    | Term     | Count | PValue            | Genes                                                                                                          | Fold Enrichment | FDR               |
|-------------|----------|-------|-------------------|----------------------------------------------------------------------------------------------------------------|-----------------|-------------------|
| UP_KEYWORDS | Immunity | 12    | 0.004031995046468 | P06339, Q9CQW9, P34884, Q9ESY9, P30681, Q61990, P63158, P01902, P01901, P01900, P01899, Q9EPB4, Q6P549, P04441 | 2.7930174563591 | 0.034943957069393 |
