# Supplementary material for: Repeated Exposure of Macrophages to Synthetic Amorphous Silica Induces Adaptive Proteome Changes and a Moderate Cell Activation
Source: MDPI journal article supplement (doi:10.3390/nano12091424), 2022-04-22
Supplement: s1 [file s1]

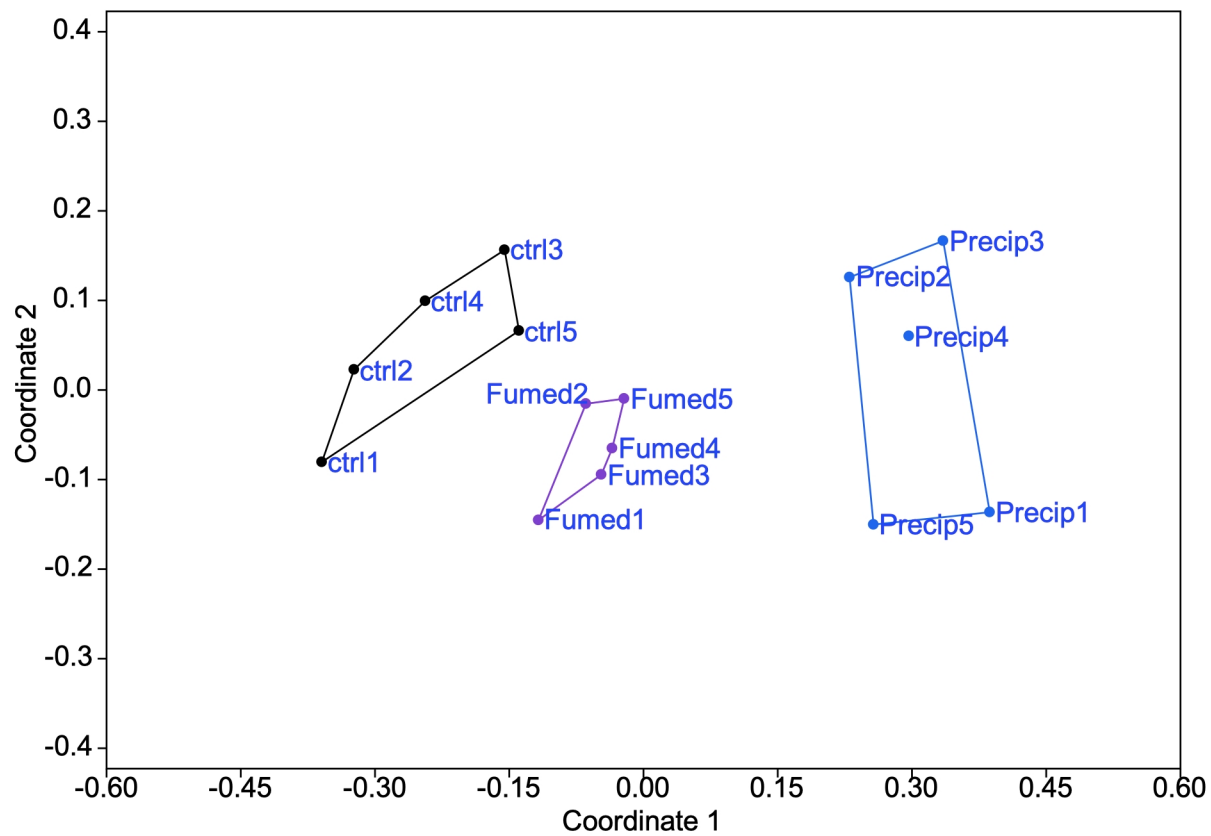

**Figure S4:** Analysis of the proteomic results obtained on J774A.1 cells after a 10 days exposure to silica by the non-metric multidimensional scaling approach. CTL: control, cells without nanomaterials, Pr: precipitated silica 220 m<sup>2</sup>/g, Fu: fumed silica 200 m<sup>2</sup>/g. The results show that 1) the groups are consistent (no interpenetration of the groups) and 2) that precipitated silica induced more changes of the proteome than fumed silica.
